# Supplementary material for: Matrisomal components involved in regenerative wound healing in axolotl and Acomys: implications for biomaterial development
Source: Royal Society of Chemistry journal article supplement (doi:10.1039/d3bm00835e), 2023-01-01
Supplement: d3bm00835e1.pdf [file d3bm00835e1.pdf]

### Table S1

List of the full mouse matrisome used in the comparison was downloaded from the [The Matrisome Project](#). The genes are ordered in columns by division, category, gene symbol, gene name, synonym, MGI\_IDs, UniProt\_IDs, Refseq\_IDs and notes.

### Table S2

List of all GAG related genes used in the comparison. The genes are ordered by category and organized in column by gene symbol, gene name and gene function.

### Table S3

FW = flank wound

The excel file shows the results of our own analysis with the microarray performed by Monaghan (2012). Column A is Affymetrix gene ID, column B contains the gene expression value on day 7, column C contains the gene expression value on day 0. Column D contains the calculated fold change of day 7 compared to day 0. Column E = P-value and column F = FDR P-value. Column G and H display the gene symbol (human) and associated gene name.

### Table S4

Sheet 1. 'Matrisome d7 vs d14'

Column A contains the gene symbols of the mouse matrisome master list and column B the associated gene names. The remaining columns display the matrisome categories; collagens (C-F), ECM glycoproteins (I-M), proteoglycans (O-T), ECM affiliated genes (V-AA), secreted factors (AC-AH) and regulators (AJ-AN). Each set of columns is organized as follows: gene symbol – gene name – fold change on day 7 – gene symbol – gene name – fold change on day 14. Only genes with  $P < 0.05$  were used for matching.

Sheet 2. 'GAG genes day 7 vs d14'

Column A contains the GAG subgroup name and the gene symbols, column B displays the gene name and column C displays the function of the encoded protein. Column D-G display the fold change and adjusted P-value for day 7 (D-E) and day 14 (F-G). Only genes with  $P < 0.05$  were used for matching.

### Table S5

Sheet 1. 'matrisome and GAG matches'

Column A (gene symbol) and column D (fold change) were extracted from S1. The remaining columns are clustered per matrisome or GAG category: column F-H = collagens, J-L = ECM glycoproteins, N-P = proteoglycans, R-T = ECM affiliated, V-X = secreted factors, Z-AB = regulators, AE-AG = preparation of linkage region, AI-AK = glycosaminoglycan chain polymerization, AM-AO = glycosaminoglycan chain modification and AQ-AS = glycosaminoglycan chain degradation. All categories are organized by: gene symbol – gene name – fold change (of the matching gene). N/A indicates no match was found in the dataset.

## Table S6

### Sheet 1. 'Brant vs Monaghan match'

Column A-C contain the matrisome and GAG matches identified in *Acomys* skin wounds on day 7. Column A = gene symbol, column B = gene name, column C = fold change. The matrisome and GAG categories are divided by rows: row 2-32 = collagens, row 35-142 = ECM glycoproteins, row 145-162 = proteoglycans, row 165-251 = ECM affiliated, row 254-412 = secreted factors, row 415-552 = regulators, row 556-567 = glycosaminoglycan chain modification. Column E-G displays the matrisome and GAG matches identified in *Axolotl* skin wounds on day 7 (column E = gene symbol, column F = gene name, column G = fold change on day 7). Row H displays whether a match was found in the *Acomys* list using the VLOOKUP function, the fold change is present when a gene matched and N/A indicates the gene was not present.

## Table S7

### Sheet 1. 'Raw data acomys'

Contains the extracted raw data for *Acomys* only from the Gawriluk et al. dataset. Column A = gene symbol, column B = sequence ID, columns C-F = fold change on day 5, 10, 15 and 20.

### Sheet 2. 'Matrisome matches'

Column A (gene symbol) and B (gene name) display the matrisome list used for the gene extraction. The following columns contain the matrisome genes identified in the dataset, organized per category: column D-H = collagens, J-N = ECM glycoproteins, P-T = proteoglycans, V-Z = ECM affiliated, AB-AF = secreted factors, AH-AL = regulators. All categories are organized by gene symbol – gene name – day 5 fold change – day 10 fold change – day 15 fold change.

### Sheet 3. 'GAG matches'

Column A-D contains the raw data (also see sheet 1). Columns G-K contain the GAG genes extracted from the dataset: column G = gene symbol, column H = gene function, column I-K = fold change on day 5 – 10 – 15. The four categories of GAG genes are divided over the rows: row 1-10 = preparation of linkage region, row 12-26 = glycosaminoglycan chain polymerization, row 28-61 = glycosaminoglycan chain modification, row 63-83 = glycosaminoglycan chain degradation/

## Table S8

### Sheet 1. 'Fold change calculation'

Column A-F raw data from the Stewart dataset. Column A = gene symbol, column B = raw data timepoint 0, column C = datapoints from column B were converted from 0 to 1. Column D-F = raw data for timepoint 5 – 10 – 14. Column H-K = fold changes for day 5 – 10 – 14 compared to day 0.

### Sheet 2. 'Matrisome matches'

Matrisome genes extracted from the data, when fold change = 0-1 the value was converted using  $1/FC$ . Matrisome categories are ordered by columns with column A-E = collagens, G-K = ECM glycoproteins, M-Q = proteoglycans, S-W = ECM affiliated, Y-AC = secreted factors, AE-AI = regulators.

All categories are organized by gene symbol – gene name – day 5 fold change – day 10 fold change – day 14 fold change.

### Sheet 3. 'GAG matches'

GAG matches extracted from the data, when fold change = 0-1 the value was converted using  $-1/FC$ . GAG categories are ordered by rows: row 1-4 = preparation of linkage region, 8-18 = glycosaminoglycan chain polymerization, 20-40 = glycosaminoglycan chain modification, 42-58 = glycosaminoglycan chain degradation. All categories are organized by column, column A = gene symbol, column B = gene name, columns C-D-E = fold change on day 5-10-14.

## Table S9

### Sheet 1. 'Matrisome: Stewart vs Gawriluk'

Columns A-E contain the matrisome matches identified in *Acomys* from the Gawriluk dataset. Column F and G are the gene symbol and gene name, respectively. Column H-J are the fold changes for these genes in Axolotl (Stewart data). In column K-M the fold change of *Acomys* was matched to these genes, in case of N/A no matching gene was present in the *acomys* dataset. The matrisome categories are ordered by rows: row 2-37 = collagens, row 42-184 = ECM glycoproteins, row 187 – 216 = proteoglycans, row 219-317 = ECM affiliated, row 320-500 = secreted factors, row 503-654 = regulators.

### Sheet 2. 'GAG: Stewart vs Gawriluk'

Matching GAG genes between Stewart and Gawriluk. GAG gene categories are organized by row: row 1-5 = preparation of linkage region, row 7-17 = glycosaminoglycan chain polymerization, row 19-36 = glycosaminoglycan chain modification, row 38-53 = glycosaminoglycan chain degradation. Categories are organized by columns. Column A = gene symbol, column B = gene name, column C-E = fold change in axolotl, column F-H = fold change in axolotl.
