# Supplementary material for: Matrisomal components involved in regenerative wound healing in axolotl and Acomys: implications for biomaterial development
Source: Royal Society of Chemistry journal article supplement (doi:10.1039/d3bm00835e), 2023-01-01
Supplement: d3bm00835e3.xlsx [file d3bm00835e3.xlsx]

## Sheet: Sheet1
Preparation of Linkage region
Gene symbol	Gene name	Function
B3galt6	Beta-1,3-galactosyltransferase 6	Transferring UDP‐galactose to galactose‐xylose on proteoglycan
B3gat1	3-beta-glucoronosyltransferase 1	Transferring UDP‐GlcA to galactose‐galactose‐xylose on proteoglycan
B3gat2	3-beta-glucoronosyltransferase 2	Transferring UDP‐GlcA to galactose‐galactose‐xylose on proteoglycan
B3gat3	3-beta-glucoronosyltransferase 3	Transferring UDP‐GlcA to galactose‐galactose‐xylose on proteoglycan
B4galt2	Beta-1,4-galactosyltransferase 2	Transfering UDP‐galactose to GlcNAc, Glc, and Xyl.
B4galt7	Beta-1,4-galactosyltransferase 7	Transferring UDP‐galactose to xylose on proteoglycan
Xylt1	Xylosyltransferase 1	Transferring UDP‐xylose to proteoglycan
Xylt2	Xylosyltransferase 2	Transferring UDP‐xylose to proteoglycan
Glycosaminoglycan chain polimerisation
Gene symbol	Gene name	Function
Chpf	Chondroitin polymerizing factor	Transferring UDP‐GlcA to GalNAc at end of sugar chain (CS)
Chsy1	Chondroitin sulfate synthase 1	Transferring UDP‐GlcA to GalNAc at end of sugar chain (CS)
Chsy3	Chondroitin sulfate synthase 3	Transferring UDP‐GlcA to GalNAc at end of sugar chain (CS)
Csgalnact1	Chondroitin sulfate N-acetylgalactosaminyltransferase 1	Transferring UDP‐GalNAc to GlcA at end of sugar chain (CS)
Csgalnact2	Chondroitin sulfate N-acetylgalactosaminyltransferase 2	Transferring UDP‐GalNAc to GlcA at end of sugar chain (CS)
Ext1	Exostosin glycosyltransferase 1	Transferring UDP‐GlcNAc to GlcA at end of sugar chain (HS)
Ext2	Exostosin glycosyltransferase 2	Transferring UDP‐GlcNAc to GlcA at end of sugar chain (HS)
Extl1	Exostosin like glycosyltransferase 1	Transferring UDP‐GlcA to GlcNAc at end of sugar chain (HS)
Extl2	Exostosin like glycosyltransferase 2	Transferring UDP‐GlcA to GlcNAc at end of sugar chain (HS)
Extl3	Exostosin like glycosyltransferase 3	Transferring UDP‐GlcA to GlcNAc at end of sugar chain (HS)
Has1	Hyaluronan synthase 1	Polymerisation of hyaluronic acid
Has2	Hyaluronan synthase 2	Polymerisation of hyaluronic acid
Has3	Hyaluronan synthase 3	Polymerisation of hyaluronic acid
Glycsaminoglycan chain modification
Gene symbol	Gene name	Function
Chst11	Carbohydrate sulfotransferase 11	Sulfation at the 4‐O postion of GalNAc untis (CS)
Chst12	Carbohydrate sulfotransferase 12	Sulfation at the 4‐O postion of GalNAc untis (CS)
Chst13	Carbohydrate sulfotransferase 13	Sulfation at the 4‐O postion of GalNAc untis (CS)
Chst14	Carbohydrate sulfotransferase 14	Sulfation at the 4‐O postion of GalNAc untis (CS)
Chst15	Carbohydrate sulfotransferase 15	Sulfation at the 6‐O postion of GalNAc untis (CS)
Chst2	Carbohydrate sulfotransferase 2	Sulfation at the 6‐O postion of GalNAc untis (CS)
Chst3	Carbohydrate sulfotransferase 3	Sulfation at the 6‐O postion of GalNAc untis (CS)
Chst4	Carbohydrate sulfotransferase 4	Sulfation at the 6‐O postion of GalNAc untis (CS)
Chst5	Carbohydrate sulfotransferase 5	Sulfation at the 6‐O postion of GalNAc untis (CS)
Chst7	Carbohydrate sulfotransferase 7	Sulfation at the 6‐O postion of GalNAc untis (CS)
Chst8	Carbohydrate sulfotransferase 8	Sulfation at the 4‐O postion of GalNAc untis (CS)
Chst9	Carbohydrate sulfotransferase 9	Sulfation at the 4‐O postion of GalNAc untis (CS)
Dse	Dermatan sulfate epimerase	Epimerisation of GlcA unit into iduronic acid unit (IdoA) (CS)
Glce	Glucuronic acid epimerase	pimerisation of GlcA unit into iduronic acid unit (IdoA) (HS)
Hs2st1	Heparan sulfate 2-O-sulfotransferase 1	Sulfation at the 2‐O position of GlcA and IdoA units (HS)
Hs3st1	Heparan sulfate 3-O-sulfotransferase 1	Sulfation at the 3‐O position of GlcNAc and GlcNS units sulfated at the 6‐O position (HS)
Hs3st2	Heparan sulfate 3-O-sulfotransferase 2	Sulfation at the 3‐O position of GlcNAc and GlcNS units sulfated at the 6‐O position (HS)
Hs3st3a1	Heparan sulfate-glucosamine 3-sulfotransferase 3A1	Sulfation at the 3‐O position of GlcNAc and GlcNS units sulfated at the 6‐O position (HS)
Hs3st3b1	Heparan sulfate-glucosamine 3-sulfotransferase 3B1	Sulfation at the 3‐O position of GlcNAc and GlcNS units sulfated at the 6‐O position (HS)
Hs3st6	Heparan sulfate-glucosamine 3-sulfotransferase 6	Sulfation at the 3‐O position of GlcNAc and GlcNS units sulfated at the 6‐O position (HS)
Hs6st1	Heparan sulfate-glucosamine 6-sulfotransferase 1	Sulfation at the 6‐O position of GlcNAc and N‐sulfated‐glucuronic acid units (GlcNS) (HS)
Hs6st2	Heparan sulfate-glucosamine 6-sulfotransferase 2	Sulfation at the 6‐O position of GlcNAc and GlcNS units (HS)
Hs6st3	Heparan sulfate-glucosamine 6-sulfotransferase 3	Sulfation at the 6‐O position of GlcNAc and GlcNS units (HS)
Ndst1	N-deacetylase and N-sulfotransferase 1	N‐de‐acetylation and N‐sulfation of GlcNAc unit (HS)
Ndst2	N-deacetylase and N-sulfotransferase 2	N‐de‐acetylation and N‐sulfation of GlcNAc unit (HS)
Ndst3	N-deacetylase and N-sulfotransferase 3	N‐de‐acetylation and N‐sulfation of GlcNAc unit (HS)
Ndst4	N-deacetylase and N-sulfotransferase 4	N‐de‐acetylation and N‐sulfation of GlcNAc unit (HS)
Sulf1	Sulfatase 1	Desulfation of the 6‐O positon of 6‐O sulfated GlcNAc and GlcNS units (HS)
Sulf2	Sulfatase 2	Desulfation of the 6‐O positon of 6‐O sulfated GlcNAc and GlcNS units (HS)
Sumf1	Sulfatase modifying factor 1	Cofactor for Sulf1 and Sulf 2 (HS)
Sumf2	Sulfatase modifying factor 2	Cofactor for Sulf1 and Sulf 2 (HS)
Ust	Uronyl 2-sulfotransferase	Sulfation at the 2‐O position of GlcA and IdoA units (CS)
Glycosaminoglycan chain degradation
Gene symbol	Gene name	function
Arsb	Arylsulfatase A	Desulfation of the 4‐O position of 4‐O sulfated GalNAc units (CS)
Arsj	Arylsulfatse family member J	Desulfation of the 4‐O position of 4‐O sulfated GalNAc units (CS)
Arsk	Arylsulfatse family member K	Desulfation of proteoglycans, paralog of IDS
Galns	Galactosamine (N-acetyl)-6-sulfatase	Desulfation of the 6‐O positon of 6‐O sulfated GalNAc units (CS)
Gns	Glucosamine (N-acetyl)-6-sulfatase	Desulfation of the 6‐O positon of 6‐O sulfated GlcNAc and GlcNS units (HS)
Gusb	Glucoronidase beta	Hydrolysation of GlcA from sugar chain (HS and Hyaluronic acid and CS)
Hexa	Hexosaminidase subunit alpha	Hydrolysation of GalNAc units (CS) and GlcNAc untis (hyaluronic acid) from sugar chain
Hexb	Hexosaminidase subunit beta	Hydrolysation of GalNAc units (CS) and GlcNAc untis (hyaluronic acid) from sugar chain
Hgsnat	Heparan-alpha-glucosaminide N-acetyltransferase	Acetylation of desulfated GlcNS units (HS)
Hpse	Heparanase	Degradation of HS chains extracellularly
Hyal1	Hyaluronidase 1	Degradation of hyaluronic acid chain
Hyal2	Hyaluronidase 2	Degradation of hyaluronic acid chain
Hyal3	Hyaluronidase 3	Degradation of hyaluronic acid chain
Ids	Iduronate 2-sulfatase	Desulfation of 2‐O sulfated IdoA and GlcA units (HS and CS)
Idua	Alpha-L-iduronidase	Hydrolysation of IdoA unit from sugar chain (HS and CS)
Mgea5	Protein O-GlcNAcase	Degradation of hyaluronic acid chain
Naga	Alpha-N-Acetylgalactosaminidase	Hydrolysis N‐GalNAc moieties from glycoconjugates.
Naglu	N-Acetyl-Alpha-Glucosaminidase	Hydrolysation of GlcNAc from sugar chain (HS)
Sgsh	N-Sulfoglucosamine Sulfohydrolase	Desulfation of GlcNS units (HS)
