# Supplementary material for: Matrisomal components involved in regenerative wound healing in axolotl and Acomys: implications for biomaterial development
Source: Royal Society of Chemistry journal article supplement (doi:10.1039/d3bm00835e), 2023-01-01
Supplement: d3bm00835e4.xlsx [file d3bm00835e4.xlsx]

## Sheet: 1. data export
#%result_name=Analysis_2
#%array_type=AMBY_002a520748F
#%annotation=AMBY_002a520748F.annot.csv
#%comparison=10 vs 11
ID	Day 7 FW	Day 0 FW	Fold Change	P-val	FDR P-val	GeneSymbol	GeneName
axo19472-f_at	12.17	4.26	241.9	1.05e-22	1.5e-19	KAZALD1	Kazal-type serine peptidase inhibitor domain 1 precursor [Homo sapiens]
axo31558-f_at	12.61	5.39	148.38	1.47e-21	1.74e-18		No Hit
axo30030-f_at	10.15	3.25	119.68	2.25e-20	1.51e-17		No Hit
axo08175-f_at	12.55	5.76	110.45	1.78e-22	2.38e-19	MMP1	matrix metalloproteinase 1 isoform 1 preproprotein [Homo sapiens]
axo00376-f_at	11.34	4.95	83.85	5.95e-30	1.2e-25	COL11A1	alpha 1 type XI collagen isoform B preproprotein [Homo sapiens]
axo29961-f_at	9.83	3.71	69.92	3.48e-12	2.95e-10		No Hit
axo12021-r_at	9.94	3.86	67.96	1.02e-22	1.5e-19	PAMR1	regeneration associated muscle protease isoform b [Homo sapiens]
axo11147-f_at	9.84	3.78	66.75	1.65e-14	2.71e-12	HMGCS2	hydroxymethylglutaryl-CoA synthase 2 [Homo sapiens]
axo19057-f_at	12.46	6.51	61.74	9.73e-16	2.38e-13	PLBD1	phospholipase B domain containing 1 [Homo sapiens]
axo07949-f_at	14.07	8.2	58.6	1.19e-27	5.99e-24	TNC	tenascin C precursor [Homo sapiens]
axo07790-r_at	10.35	4.83	45.86	2.95e-18	1.38e-15	F13B	coagulation factor XIII B subunit precursor [Homo sapiens]
axo06014-r_at	14.41	8.96	43.45	2.5e-22	3.13e-19	KRT17	keratin 17 [Homo sapiens]
axo03591-f_at	11.79	6.48	39.7	4.17e-19	2.15e-16	FN1	fibronectin 1 isoform 1 preproprotein [Homo sapiens]
axo17557-f_at	9.51	4.2	39.56	8.07e-28	5.99e-24	SALL4	sal-like 4 [Homo sapiens]
axo10787-f_at	12.88	7.68	36.69	2.49e-24	5.56e-21	COL7A1	alpha 1 type VII collagen precursor [Homo sapiens]
axo03236-f_at	10.67	5.65	32.45	1.55e-20	1.2e-17	COL28A1	collagen, type XXVIII precursor [Homo sapiens]
axo24990-f_at	9.09	4.18	30.14	1.72e-15	3.84e-13		No Hit
axo24047-f_at	10.83	5.94	29.76	7.14e-14	1.01e-11		Prod 1 [Notophthalmus viridescens]
axo08969-f_at	12.03	7.25	27.53	1.38e-18	6.62e-16	THBS2	thrombospondin 2 precursor [Homo sapiens]
axo15921-f_at	9.27	4.53	26.81	8.64e-21	6.94e-18	DACT1	dapper 1 isoform 1 [Homo sapiens]
axo02795-f_at	9.72	5.05	25.45	1.09e-19	6.25e-17	FILIP1L	filamin A interacting protein 1-like isoform 1 [Homo sapiens]
axo29842-f_at	10.8	6.16	24.92	1.29e-13	1.69e-11		No Hit
axo11376-f_at	10.75	6.23	22.88	1.48e-08	4.37e-07	TAGLN	transgelin [Homo sapiens]
axo26232-f_at	8.65	4.24	21.31	3.82e-21	3.6e-18		No Hit
axo11181-f_at	8.65	4.24	21.21	1.16e-18	5.69e-16	LAMA1	laminin, alpha 1 precursor [Homo sapiens]
axo31329-f_at	8.96	4.59	20.76	2.23e-12	2.06e-10		No Hit
axo04310-f_at	10.08	5.8	19.47	6.79e-20	4.26e-17	FILIP1L	filamin A interacting protein 1-like isoform 3 [Homo sapiens]
axo08174-f_at	8.95	4.69	19.11	2.44e-17	9.25e-15	MMP1	matrix metalloproteinase 1 isoform 1 preproprotein [Homo sapiens]
axo16342-r_at	9.72	5.47	19.09	2.34e-27	9.4e-24	TMEM132A	transmembrane protein 132A isoform a [Homo sapiens]
axo04312-f_at	7.87	3.62	19.08	1.2e-09	4.88e-08	FILIP1L	filamin A interacting protein 1-like isoform 3 [Homo sapiens]
axo28400-f_at	9.26	5.07	18.21	1.38e-24	3.47e-21		No Hit
axo09896-f_at	8.57	4.4	17.97	5.86e-21	4.91e-18	CHST2	carbohydrate (N-acetylglucosamine-6-O) sulfotransferase 2 [Homo sapiens]
axo08967-f_at	7.95	3.97	15.78	1.52e-17	6.23e-15	THBS1	thrombospondin 1 precursor [Homo sapiens]
axo08099-f_at	11.43	7.45	15.77	1.82e-15	4.02e-13	LOXL2	lysyl oxidase-like 2 precursor [Homo sapiens]
axo27892-f_at	9.05	5.09	15.61	4.63e-16	1.25e-13		No Hit
axo29485-f_at	10.14	6.19	15.44	1.63e-20	1.21e-17		No Hit
axo00253-r_at	8.34	4.41	15.32	4.08e-19	2.15e-16	VIT	vitrin [Homo sapiens]
axo05681-f_at	9	5.08	15.21	4.23e-15	8.41e-13	SULF1	sulfatase 1 [Homo sapiens]
axo29356-f_at	10.21	6.29	15.18	7.85e-20	4.65e-17		No Hit
axo21601-r_at	7.12	3.2	15.04	1.89e-13	2.39e-11		conserved hypothetical protein [Culex quinquefasciatus]
axo14998-f_at	8.37	4.48	14.76	5.61e-14	8.22e-12	MXRA5	adlican [Homo sapiens]
axo22435-f_at	9.62	5.74	14.71	6.87e-06	8.99e-05		avidin [Xenopus (Silurana) tropicalis]
axo15507-f_at	13.09	9.23	14.5	1.6e-25	5.34e-22	PALLD	palladin [Homo sapiens]
axo03439-f_at	9.09	5.28	14.1	1.51e-16	4.75e-14	EFEMP1	EGF-containing fibulin-like extracellular matrix protein 1 precursor [Homo sapiens]
axo15793-f_at	8.81	5.03	13.73	2.3e-10	1.14e-08	PLEK2	pleckstrin 2 [Homo sapiens]
axo10788-r_at	10.06	6.31	13.46	4.28e-25	1.23e-21	COL7A1	alpha 1 type VII collagen precursor [Homo sapiens]
axo08179-f_at	11.97	8.23	13.34	1.59e-13	2.03e-11	MMP3	matrix metalloproteinase 3 preproprotein [Homo sapiens]
axo19330-f_at	8.75	5.02	13.29	5.43e-14	8.01e-12	ITIH5	inter-alpha trypsin inhibitor heavy chain precursor 5 isoform 1 [Homo sapiens]
axo30238-f_at	8.47	4.76	13.14	1.47e-15	3.4e-13		No Hit
axo28265-f_at	8.8	5.2	12.14	2.44e-21	2.45e-18		No Hit
axo04921-f_at	11.25	7.67	11.96	3.41e-20	2.21e-17	ENTPD1	ectonucleoside triphosphate diphosphohydrolase 1 isoform 2 [Homo sapiens]
axo31364-f_at	7.8	4.24	11.76	3.48e-11	2.19e-09		No Hit
axo07069-r_at	8.3	4.78	11.47	1.78e-10	9.11e-09	CHGA	chromogranin A precursor [Homo sapiens]
axo30211-f_at	9.98	6.46	11.45	4.66e-17	1.57e-14		No Hit
axo20743-f_at	11.83	8.32	11.42	1.21e-11	8.81e-10	FABP3	fatty acid binding protein 3 [Homo sapiens]
axo25042-f_at	12.22	8.71	11.36	7.26e-23	1.22e-19		No Hit
axo05123-f_at	8.68	5.18	11.31	1.6e-12	1.57e-10	SPATS2L	SPATS2-like protein isoform b [Homo sapiens]
axo07929-r_at	11.95	8.45	11.3	5.43e-14	8.01e-12	HMOX1	heme oxygenase (decyclizing) 1 [Homo sapiens]
axo19323-f_at	11.16	7.67	11.25	3.98e-08	1.04e-06	C6orf27	G7c protein [Homo sapiens]
axo01796-r_at	7.33	3.89	10.79	4.69e-17	1.57e-14	MAMDC2	MAM domain containing 2 [Homo sapiens]
axo06677-f_at	8.16	4.77	10.5	4.82e-16	1.27e-13	RAB34	Ras-related protein RAB34 isoform 5 [Homo sapiens]
axo03238-f_at	8.07	4.68	10.5	2.15e-19	1.2e-16	PMEPA1	transmembrane prostate androgen-induced protein isoform c [Homo sapiens]
axo09110-f_at	8.08	4.7	10.43	1.54e-13	1.98e-11	VIM	vimentin [Homo sapiens]
axo03196-f_at	10.09	6.73	10.24	4e-13	4.49e-11	PTHLH	parathyroid hormone-like hormone isoform 1 preproprotein [Homo sapiens]
axo21314-f_at	9.21	5.89	10	2.19e-07	4.56e-06	KRTAP9-2	keratin associated protein 9.2 [Homo sapiens]
axo18635-r_at	8.33	5.02	9.97	2.35e-08	6.53e-07	SIGLEC1	sialoadhesin precursor [Homo sapiens]
axo04567-r_at	7.84	4.53	9.93	8.88e-15	1.61e-12	CUBN	cubilin [Homo sapiens]
axo03136-f_at	8.93	5.64	9.81	4.81e-21	4.2e-18		sulfatase 2 isoform b precursor [Homo sapiens]
axo07680-f_at	10.37	7.1	9.65	2.78e-17	9.97e-15	CRABP2	cellular retinoic acid binding protein 2 [Homo sapiens]
axo14857-r_at	11.81	8.55	9.58	4.88e-12	3.95e-10	FABP2	intestinal fatty acid binding protein 2 [Homo sapiens]
axo08186-f_at	7.4	4.14	9.55	3.72e-13	4.29e-11	MMP13	matrix metalloproteinase 13 preproprotein [Homo sapiens]
axo24762-f_at	9.73	6.48	9.51	2.83e-19	1.54e-16		No Hit
axo21579-f_at	10.74	7.5	9.47	1.48e-07	3.24e-06		DNA topoisomerase IV subunit A [Mycoplasma penetrans HF-2]
axo08503-r_at	9.72	6.48	9.44	1.34e-17	5.6e-15	HTRA1	HtrA serine peptidase 1 precursor [Homo sapiens]
axo07743-r_at	9.45	6.22	9.36	3.7e-17	1.3e-14	ADH1B	class I alcohol dehydrogenase, beta subunit [Homo sapiens]
axo25693-f_at	10.68	7.45	9.35	5.32e-12	4.27e-10		No Hit
axo08759-r_at	7.38	4.18	9.19	2.44e-12	2.21e-10	SFRP4	secreted frizzled-related protein 4 [Homo sapiens]
axo03170-f_at	7.68	4.49	9.11	1.98e-12	1.87e-10	PRICKLE2	prickle-like 2 [Homo sapiens]
axo03134-r_at	11.12	7.95	9.01	7.33e-16	1.84e-13	C1QTNF1	C1q and tumor necrosis factor related protein 1 [Homo sapiens]
axo25727-f_at	7.84	4.68	8.98	1.63e-15	3.67e-13		No Hit
axo27672-f_at	11.3	8.15	8.9	4.24e-17	1.47e-14		No Hit
axo19929-f_at	10.86	7.74	8.69	7.48e-13	7.83e-11	C2orf40	esophageal cancer related gene 4 protein [Homo sapiens]
axo00028-f_at	9.82	6.7	8.68	1.96e-17	7.83e-15	COL4A5	type IV collagen alpha 5 isoform 2 precursor [Homo sapiens]
axo13080-f_at	10.72	7.6	8.67	1.25e-15	2.96e-13	PXDN	peroxidasin [Homo sapiens]
axo30173-f_at	8.62	5.53	8.51	2.51e-07	5.1e-06		No Hit
axo09747-f_at	9.83	6.75	8.41	6.22e-06	8.32e-05	CRY1	cryptochrome 1 (photolyase-like) [Homo sapiens]
axo12750-f_at	9.06	6	8.29	5.76e-08	1.44e-06	PRSS23	protease, serine, 23 precursor [Homo sapiens]
axo31729-f_at	13.17	10.12	8.26	1.77e-07	3.79e-06		No Hit
axo10594-f_at	6.72	3.69	8.18	5.84e-08	1.45e-06	CDH15	cadherin 15 preproprotein [Homo sapiens]
axo00770-f_at	12.67	9.64	8.15	2.05e-13	2.54e-11	CTHRC1	collagen triple helix repeat containing 1 [Homo sapiens]
axo31342-f_at	8.12	5.09	8.15	1.95e-20	1.4e-17		No Hit
axo08178-f_at	7.93	4.93	8.02	1.29e-10	7.04e-09	MMP3	matrix metalloproteinase 3 preproprotein [Homo sapiens]
axo24024-r_at	12.4	9.41	7.96	3.34e-11	2.13e-09		PREDICTED: similar to collagen, type XII, alpha 1 [Taeniopygia guttata]
axo29789-f_at	6.56	3.58	7.92	2.71e-13	3.26e-11		No Hit
axo05430-f_at	12.78	9.8	7.91	8.17e-16	2.03e-13	ADFP	adipose differentiation-related protein [Homo sapiens]
axo05828-f_at	10.05	7.11	7.71	1.96e-15	4.25e-13	LTBP3	latent transforming growth factor beta binding protein 3 isoform 1 [Homo sapiens]
axo10057-f_at	8.17	5.25	7.54	1.25e-17	5.35e-15	ECM1	extracellular matrix protein 1 isoform 1 precursor [Homo sapiens]
axo08089-r_at	12.71	9.83	7.37	2.36e-12	2.15e-10	LGALS9	galectin-9 isoform short [Homo sapiens]
axo29423-f_at	7.48	4.61	7.31	2.16e-09	8.09e-08		No Hit
axo15971-f_at	7.27	4.4	7.29	6.04e-14	8.73e-12	BCMO1	beta-carotene 15, 15'-monooxygenase 1 [Homo sapiens]
axo07343-r_at	10.29	7.43	7.25	2.39e-17	9.24e-15	IGFBP2	insulin-like growth factor binding protein 2, 36kDa [Homo sapiens]
axo11819-f_at	8.95	6.09	7.24	2.52e-17	9.37e-15	PCSK5	proprotein convertase subtilisinkexin type 5 preproprotein [Homo sapiens]
axo10063-r_at	7.98	5.12	7.22	2.47e-07	5.03e-06	EFNA1	ephrin A1 isoform a precursor [Homo sapiens]
axo29410-f_at	8.37	5.55	7.08	4e-08	1.04e-06		No Hit
axo29074-f_at	11.84	9.03	7.02	8.03e-17	2.64e-14		No Hit
axo00296-f_at	6.93	4.14	6.89	0.0002	0.0017	ANTXR2	anthrax toxin receptor 2 isoform 1 [Homo sapiens]
axo05645-r_at	9.63	6.92	6.54	1.68e-10	8.68e-09	MMP2	matrix metalloproteinase 2 isoform b [Homo sapiens]
axo10111-f_at	6.48	3.77	6.52	1.22e-08	3.69e-07	FIGF	vascular endothelial growth factor D preproprotein [Homo sapiens]
axo08743-f_at	11.56	8.88	6.44	2.4e-21	2.45e-18	SDC2	syndecan 2 precursor [Homo sapiens]
axo05348-r_at	13.33	10.67	6.33	2.68e-17	9.79e-15	TGFBI	transforming growth factor, beta-induced, 68kDa precursor [Homo sapiens]
axo27841-f_at	8.06	5.41	6.29	3.47e-15	6.97e-13		No Hit
axo01819-f_at	10.25	7.61	6.26	2.29e-14	3.62e-12	TMEM86A	transmembrane protein 86A [Homo sapiens]
axo25907-f_at	8.49	5.85	6.25	5.31e-13	5.73e-11		No Hit
axo23458-r_at	6.9	4.26	6.25	2.1e-07	4.4e-06		PREDICTED: hypothetical protein isoform 2 [Gallus gallus]
axo08051-f_at	8.31	5.67	6.2	7.17e-11	4.14e-09	KRT15	keratin 15 [Homo sapiens]
axo09244-f_at	8.08	5.46	6.16	1.28e-11	9.22e-10	BCAR3	breast cancer antiestrogen resistance 3 [Homo sapiens]
axo06656-f_at	8.14	5.54	6.09	3.45e-11	2.18e-09	PRICKLE1	prickle homolog 1 [Homo sapiens]
axo05760-r_at	7.58	4.98	6.07	2.22e-06	3.35e-05	CTSK	cathepsin K preproprotein [Homo sapiens]
axo06258-f_at	8.81	6.21	6.07	1.72e-08	4.95e-07	VWDE	von Willebrand factor D and EGF domains [Homo sapiens]
axo27455-f_at	7.34	4.74	6.06	1e-13	1.34e-11		No Hit
axo11612-r_at	9.18	6.59	6.02	1.13e-12	1.14e-10	TUBA1A	tubulin, alpha 1a [Homo sapiens]
axo28115-f_at	13.22	10.64	5.97	5.31e-23	9.69e-20		No Hit
axo12695-r_at	9.09	6.52	5.94	4.89e-11	2.97e-09	THBS3	thrombospondin 3 precursor [Homo sapiens]
axo20305-r_at	8.66	6.09	5.93	2.27e-09	8.4e-08	CALD1	caldesmon 1 isoform 5 [Homo sapiens]
axo07751-r_at	10.2	7.64	5.92	1.42e-14	2.4e-12	EDNRA	endothelin receptor type A [Homo sapiens]
axo22635-f_at	9.52	6.96	5.91	1.01e-15	2.46e-13		predicted protein [Nematostella vectensis]
axo00381-f_at	8.6	6.06	5.84	1.48e-08	4.37e-07	COL12A1	collagen, type XII, alpha 1 short isoform precursor [Homo sapiens]
axo27168-f_at	8.89	6.34	5.84	5.21e-15	1.01e-12		No Hit
axo09391-f_at	8.13	5.59	5.81	1.11e-11	8.18e-10	TMEFF1	transmembrane protein with EGF-like and two follistatin-like domains 1 [Homo sapiens]
axo04606-f_at	8.01	5.48	5.77	1.44e-10	7.69e-09	ITGA6	integrin alpha chain, alpha 6 isoform a precursor [Homo sapiens]
axo09888-f_at	8.41	5.89	5.75	3.16e-07	6.17e-06	PLOD2	procollagen-lysine, 2-oxoglutarate 5-dioxygenase 2 isoform b precursor [Homo sapiens]
axo04192-f_at	8.52	6.02	5.68	5.55e-11	3.3e-09	CD68	CD68 antigen isoform B [Homo sapiens]
axo08059-r_at	11.59	9.09	5.66	1.09e-08	3.33e-07	LAMB1	laminin, beta 1 precursor [Homo sapiens]
axo24017-f_at	7.75	5.27	5.56	2.12e-05	0.0002		A Chain A, Avidin Complexed With 8-Oxodeoxyguanosine
axo16915-f_at	9.49	7.02	5.53	3.68e-16	1.03e-13	PAG1	phosphoprotein associated with glycosphingolipid microdomains 1 [Homo sapiens]
axo17748-f_at	8.1	5.64	5.51	1.16e-14	2.03e-12	SEMA6A	sema domain, transmembrane domain (TM), and cytoplasmic domain, (semaphorin) 6A [Homo sapiens]
axo31698-f_at	14.18	11.71	5.51	2.65e-07	5.36e-06		No Hit
axo22098-r_at	7.99	5.53	5.49	2.33e-08	6.5e-07		PREDICTED: hypothetical protein [Strongylocentrotus purpuratus]
axo11002-f_at	7.98	5.53	5.47	6.4e-13	6.84e-11	ITGAD	integrin, alpha D precursor [Homo sapiens]
axo06182-f_at	12.86	10.41	5.46	5.06e-16	1.32e-13	MFAP2	microfibrillar-associated protein 2 isoform b precursor [Homo sapiens]
axo12948-f_at	7.97	5.52	5.43	3.25e-09	1.14e-07	ANGPTL2	angiopoietin-like 2 precursor [Homo sapiens]
axo12401-f_at	7.69	5.26	5.39	6.74e-11	3.94e-09	MARCO	macrophage receptor with collagenous structure [Homo sapiens]
axo08756-f_at	9.41	6.98	5.39	3.42e-14	5.28e-12	SFRP2	secreted frizzled-related protein 2 precursor [Homo sapiens]
axo11926-f_at	7.99	5.56	5.38	1.24e-10	6.78e-09	TLN1	talin 1 [Homo sapiens]
axo10235-r_at	6.9	4.47	5.38	6.43e-11	3.79e-09	PPP2R2B	beta isoform of regulatory subunit B55, protein phosphatase 2 isoform a [Homo sapiens]
axo14754-r_at	7.33	4.92	5.32	4.24e-09	1.43e-07	DENND5A	RAB6 interacting protein 1 [Homo sapiens]
axo08956-r_at	13.13	10.72	5.3	5.72e-06	7.74e-05	TFF3	trefoil factor 3 precursor [Homo sapiens]
axo31418-f_at	9.71	7.31	5.29	1.02e-08	3.14e-07		No Hit
axo07809-r_at	10.47	8.08	5.27	1.03e-07	2.37e-06	FBN2	fibrillin 2 precursor [Homo sapiens]
axo26372-f_at	7.07	4.68	5.24	1.45e-09	5.72e-08		No Hit
axo25001-f_at	6.44	4.06	5.23	4.76e-09	1.59e-07		No Hit
axo27244-f_at	10.04	7.66	5.22	3.33e-12	2.84e-10		No Hit
axo26383-f_at	7.55	5.17	5.2	7.11e-07	1.25e-05		No Hit
axo00377-f_at	7.58	5.21	5.18	4.03e-12	3.36e-10	COL11A1	alpha 1 type XI collagen isoform B preproprotein [Homo sapiens]
axo07990-f_at	11.71	9.34	5.17	3.49e-18	1.59e-15	ITGB1	integrin beta 1 isoform 1A precursor [Homo sapiens]
axo29778-f_at	9.65	7.29	5.14	2.34e-09	8.62e-08		No Hit
axo03497-f_at	9.21	6.85	5.13	2.32e-08	6.5e-07	LTBP1	latent transforming growth factor beta binding protein 1 isoform LTBP-1L [Homo sapiens]
axo31580-f_s_at	13.15	10.79	5.12	7.33e-11	4.2e-09		No Hit
axo10076-f_at	7.06	4.7	5.11	5.73e-11	3.4e-09	EPHA7	ephrin receptor EphA7 [Homo sapiens]
axo06259-r_s_at	8.51	6.15	5.1	4.98e-08	1.26e-06	POSTN	periostin, osteoblast specific factor isoform 2 [Homo sapiens]
axo08199-f_at	8.8	6.46	5.07	1.9e-07	4.01e-06	MRC1	mannose receptor C type 1 precursor [Homo sapiens]
axo09287-f_at	9.22	6.88	5.06	3.68e-10	1.69e-08	KLF11	Kruppel-like factor 11 [Homo sapiens]
axo18380-f_at	9.93	7.6	5.04	4.14e-13	4.58e-11	LEPRE1	leprecan 1 isoform 1 [Homo sapiens]
axo12174-f_at	8.15	5.85	4.93	5.19e-13	5.63e-11	TFPI2	tissue factor pathway inhibitor 2 [Homo sapiens]
axo05779-r_at	9.99	7.69	4.92	1.77e-10	9.11e-09	CYBB	cytochrome b-245 beta polypeptide [Homo sapiens]
axo25024-f_at	9.86	7.57	4.92	1.87e-09	7.08e-08		No Hit
axo13581-r_at	12.67	10.38	4.91	2.49e-11	1.67e-09	GPNMB	glycoprotein (transmembrane) nmb isoform a precursor [Homo sapiens]
axo08849-f_at	13.18	10.89	4.89	3.51e-16	9.93e-14	SPARC	secreted protein, acidic, cysteine-rich [Homo sapiens]
axo31404-f_at	8.23	5.94	4.86	1.65e-08	4.8e-07		No Hit
axo19616-f_at	6.65	4.38	4.85	2.44e-11	1.64e-09	ESPN	espin [Homo sapiens]
axo03268-f_at	11.81	9.53	4.85	2.69e-12	2.43e-10	KRT12	keratin 12 [Homo sapiens]
axo01710-f_at	7.54	5.26	4.85	9.68e-14	1.32e-11	COL24A1	collagen, type XXIV, alpha 1 [Homo sapiens]
axo07379-f_at	11.27	8.99	4.84	1.28e-08	3.87e-07	IL10RA	interleukin 10 receptor, alpha precursor [Homo sapiens]
axo24396-f_at	10.18	7.91	4.82	1.07e-07	2.44e-06		alpha-aspartyl dipeptidase (gene D) [Xenopus laevis]
axo03628-r_at	11.76	9.5	4.79	2e-16	5.82e-14	TPM2	tropomyosin 2 (beta) isoform 2 [Homo sapiens]
axo18209-f_at	13.31	11.06	4.77	5.74e-13	6.17e-11	FKBP10	FK506 binding protein 10, 65 kDa [Homo sapiens]
axo10583-f_at	11.85	9.61	4.73	7.35e-10	3.16e-08	COL5A1	alpha 1 type V collagen preproprotein [Homo sapiens]
axo12606-r_at	8.05	5.82	4.7	4.45e-10	2e-08	RASA4	RAS p21 protein activator 4 isoform 1 [Homo sapiens]
axo02775-f_at	7.41	5.18	4.67	1.42e-10	7.58e-09	CREM	cAMP responsive element modulator isoform h [Homo sapiens]
axo14290-r_at	10.96	8.74	4.66	0.0002	0.0014	F13A1	coagulation factor XIII A1 subunit precursor [Homo sapiens]
axo07131-f_at	11.28	9.07	4.62	3.05e-12	2.7e-10	CD53	CD53 antigen [Homo sapiens]
axo28223-f_at	9.21	7.01	4.6	2.1e-12	1.96e-10		No Hit
axo12107-f_at	9.35	7.15	4.58	1.47e-14	2.46e-12	SC65	synaptonemal complex protein SC65 [Homo sapiens]
axo20306-f_at	11.48	9.3	4.56	7.09e-11	4.1e-09	CALD1	caldesmon 1 isoform 5 [Homo sapiens]
axo07699-r_at	8.2	6.01	4.55	1.1e-05	0.0001	CTGF	connective tissue growth factor [Homo sapiens]
axo12831-f_at	8.51	6.33	4.54	1.04e-11	7.77e-10	FKBP9	FK506 binding protein 9 [Homo sapiens]
axo11920-f_at	11.87	9.69	4.53	5.65e-18	2.52e-15	TFPI	tissue factor pathway inhibitor isoform a precursor [Homo sapiens]
axo07436-f_at	11.4	9.22	4.53	2.72e-09	9.76e-08	AIF1	allograft inflammatory factor 1 isoform 3 [Homo sapiens]
axo08941-f_at	8.15	5.98	4.49	6.12e-05	0.0006	TCF3	transcription factor 3 isoform E12 [Homo sapiens]
axo30782-f_at	5.99	3.82	4.48	0.0065	0.0308		No Hit
axo24883-f_at	8.18	6.03	4.47	2.05e-14	3.33e-12		No Hit
axo05705-r_at	7.87	5.72	4.46	9.62e-07	1.63e-05	C4orf18	hypothetical protein LOC51313 isoform 2 [Homo sapiens]
axo29346-f_at	10.56	8.42	4.41	2.1e-06	3.2e-05		No Hit
axo07530-f_at	7.71	5.57	4.4	4.82e-14	7.28e-12	BNC1	basonuclin 1 [Homo sapiens]
axo10653-f_at	6.55	4.41	4.4	3.66e-13	4.25e-11	MMP14	matrix metalloproteinase 14 preproprotein [Homo sapiens]
axo27222-f_at	8.09	5.95	4.4	7.43e-10	3.18e-08		No Hit
axo08505-f_at	6.81	4.68	4.39	2.81e-07	5.62e-06	PRTN3	proteinase 3 (serine proteinase, neutrophil, Wegener granulomatosis autoantigen) [Homo sapiens]
axo28076-f_at	8.29	6.16	4.39	0.0004	0.0031		No Hit
axo06518-r_at	14.16	12.02	4.38	7.87e-20	4.65e-17	COL17A1	alpha 1 type XVII collagen [Homo sapiens]
axo24112-r_at	8.61	6.48	4.37	1.43e-05	0.0002		Ly-6uPAR-related protein-1 [Xenopus laevis]
axo09019-r_at	9.27	7.15	4.35	2.1e-15	4.48e-13	TPM4	tropomyosin 4 isoform 2 [Homo sapiens]
axo10481-r_at	9.06	6.94	4.35	2.14e-15	4.52e-13	CYP7B1	cytochrome P450, family 7, subfamily B, polypeptide 1 [Homo sapiens]
axo10695-f_at	11.87	9.75	4.34	6.92e-12	5.4e-10	SERPINB10	serine (or cysteine) proteinase inhibitor, clade B (ovalbumin), member 10 [Homo sapiens]
axo12645-r_at	6.12	4.02	4.3	9.24e-07	1.57e-05	ESM1	endothelial cell-specific molecule 1 isoform a precursor [Homo sapiens]
axo10398-f_at	8.92	6.82	4.27	1.11e-10	6.15e-09	COL3A1	collagen type III alpha 1 preproprotein [Homo sapiens]
axo00893-r_at	7.23	5.15	4.25	2.9e-09	1.03e-07	CD300LF	NK inhibitory receptor precursor [Homo sapiens]
axo11946-f_at	11.83	9.75	4.22	3.56e-12	3e-10	SRPX	sushi-repeat-containing protein, X-linked [Homo sapiens]
axo10176-f_at	9.27	7.19	4.22	6.91e-05	0.0007	MMP2	matrix metalloproteinase 2 isoform a preproprotein [Homo sapiens]
axo16422-r_at	8.66	6.59	4.21	7.58e-10	3.23e-08	FKBP14	FK506 binding protein 14 [Homo sapiens]
axo29167-f_at	11.13	9.06	4.21	1.7e-16	5.27e-14		No Hit
axo27228-f_at	6.48	4.41	4.2	7.31e-07	1.28e-05		No Hit
axo08501-f_at	8.03	5.97	4.17	5.57e-09	1.81e-07	HTRA1	HtrA serine peptidase 1 precursor [Homo sapiens]
axo05637-f_at	9.54	7.49	4.14	3e-07	5.91e-06	PRG4	proteoglycan 4 isoform D [Homo sapiens]
axo03396-r_at	7.16	5.12	4.12	3.22e-11	2.06e-09	FIBIN	fin bud initiation factor homolog [Homo sapiens]
axo12175-f_at	8.22	6.18	4.11	4.04e-10	1.83e-08	TFPI2	tissue factor pathway inhibitor 2 [Homo sapiens]
axo04565-f_at	5.98	3.94	4.11	1.26e-09	5.06e-08	CUBN	cubilin [Homo sapiens]
axo25415-f_at	7.47	5.44	4.09	4.66e-12	3.79e-10		No Hit
axo29487-f_at	7.82	5.79	4.07	1.57e-10	8.27e-09		No Hit
axo12522-f_at	6.09	4.07	4.05	1.25e-10	6.79e-09	STON1	stonin 1 [Homo sapiens]
axo10311-f_at	10.93	8.91	4.05	1.38e-08	4.13e-07	SDPR	serum deprivation response protein [Homo sapiens]
axo17341-f_at	7.26	5.25	4.04	7.29e-11	4.2e-09		UDP-glucose ceramide glucosyltransferase-like 2 [Homo sapiens]
axo19468-r_at	7.89	5.89	4.01	7.76e-07	1.35e-05	ITM2C	integral membrane protein 2C isoform 1 [Homo sapiens]
axo01335-f_at	8.35	6.35	4.01	0.0114	0.0485	EVC2	limbin [Homo sapiens]
axo08144-f_at	6.73	4.74	3.97	1.95e-13	2.44e-11	MAS1	MAS1 oncogene [Homo sapiens]
axo30519-f_at	6.43	4.44	3.96	1.31e-14	2.25e-12		No Hit
axo10959-r_at	7.92	5.94	3.94	2.78e-10	1.33e-08	GPR35	G protein-coupled receptor 35 [Homo sapiens]
axo05729-f_at	11.98	10.01	3.92	2.64e-10	1.27e-08	COL5A2	alpha 2 type V collagen preproprotein [Homo sapiens]
axo00388-f_at	9.46	7.49	3.91	7.58e-10	3.23e-08	ACY3	aspartoacylase (aminocyclase) 3 [Homo sapiens]
axo08767-f_at	9.88	7.93	3.87	0.0083	0.0373	SFTPD	pulmonary surfactant-associated protein D precursor [Homo sapiens]
axo13263-f_at	9.04	7.09	3.86	5.79e-10	2.52e-08	FLRT2	fibronectin leucine rich transmembrane protein 2 [Homo sapiens]
axo24921-f_at	7.19	5.25	3.85	7.71e-06	9.92e-05		No Hit
axo21139-f_at	8.21	6.27	3.83	2.91e-10	1.38e-08	LOC729085	hypothetical protein LOC729085 [Homo sapiens]
axo16423-f_at	8.26	6.32	3.82	1.31e-14	2.25e-12	FKBP14	FK506 binding protein 14 [Homo sapiens]
axo27123-f_at	8.79	6.86	3.82	4.66e-16	1.25e-13		No Hit
axo07031-f_at	7.84	5.91	3.82	3.38e-10	1.57e-08	SERPINH1	serine (or cysteine) proteinase inhibitor, clade H, member 1 precursor [Homo sapiens]
axo18073-r_at	7.74	5.81	3.81	5.69e-10	2.48e-08	RHOU	ras homolog gene family, member U [Homo sapiens]
axo26418-f_at	8.85	6.92	3.8	6.98e-12	5.43e-10		No Hit
axo20022-f_at	6.25	4.32	3.8	4.43e-07	8.29e-06	DGAT2	diacylglycerol O-acyltransferase homolog 2 [Homo sapiens]
axo25819-f_at	5.59	3.66	3.8	1.25e-12	1.25e-10		No Hit
axo04452-f_at	6.12	4.2	3.78	3.24e-08	8.7e-07	NCF1	neutrophil cytosolic factor 1 [Homo sapiens]
axo19386-f_at	11.95	10.03	3.78	4.77e-13	5.2e-11	SERPINB1	serine (or cysteine) proteinase inhibitor, clade B (ovalbumin), member 1 [Homo sapiens]
axo02319-f_at	8.24	6.33	3.76	7.26e-12	5.63e-10	C8orf42	hypothetical protein LOC157695 [Homo sapiens]
axo13240-f_at	9.03	7.12	3.76	8.18e-07	1.41e-05	TLL1	tolloid-like 1 [Homo sapiens]
axo11192-r_at	12.31	10.4	3.74	3.66e-12	3.07e-10	LGALS3BP	galectin 3 binding protein [Homo sapiens]
axo22108-r_at	6.91	5.01	3.73	0.0014	0.0088		sodefrin precursor-like factor [Desmognathus monticola]
axo07993-r_at	10.16	8.26	3.72	2.04e-20	1.41e-17	ITGB5	integrin, beta 5 [Homo sapiens]
axo24546-f_at	8.99	7.1	3.71	1.99e-17	7.83e-15		No Hit
axo28240-f_at	7.99	6.1	3.71	1.37e-16	4.38e-14		No Hit
axo27795-f_at	6.13	4.24	3.7	0.0005	0.0036		No Hit
axo30728-f_at	6.82	4.94	3.68	1.74e-09	6.64e-08		No Hit
axo01935-f_at	6.95	5.07	3.67	3.46e-10	1.6e-08	TGIF1	TG-interacting factor isoform a [Homo sapiens]
axo31371-f_at	10.51	8.63	3.67	2.98e-16	8.56e-14		No Hit
axo01022-f_at	7.18	5.31	3.65	5.39e-10	2.37e-08	RFTN2	raftlin family member 2 [Homo sapiens]
axo17387-f_at	7.2	5.34	3.63	5.9e-12	4.66e-10	PMEPA1	transmembrane prostate androgen-induced protein isoform a [Homo sapiens]
axo27294-f_at	10.16	8.3	3.62	1.4e-07	3.09e-06		No Hit
axo04224-f_at	13.58	11.72	3.62	7.72e-09	2.45e-07	LYZ	lysozyme precursor [Homo sapiens]
axo24039-f_at	7.59	5.74	3.6	0.0041	0.0209		PREDICTED: similar to histone H4 [Ornithorhynchus anatinus]
axo00389-f_at	7.23	5.39	3.6	9.19e-10	3.85e-08	ACY3	aspartoacylase (aminocyclase) 3 [Homo sapiens]
axo11131-f_at	8.36	6.51	3.6	7.72e-11	4.4e-09	ABCA1	ATP-binding cassette, sub-family A member 1 [Homo sapiens]
axo10923-f_at	9.22	7.38	3.58	1.08e-14	1.92e-12	FAT1	FAT tumor suppressor 1 precursor [Homo sapiens]
axo06171-r_at	11.65	9.82	3.57	9.17e-14	1.27e-11	FKBP7	FK506 binding protein 7 isoform b precursor [Homo sapiens]
axo27577-f_at	8.98	7.15	3.56	5.83e-06	7.88e-05		No Hit
axo12675-r_at	12.96	11.13	3.54	3.17e-12	2.77e-10	FSTL1	follistatin-like 1 precursor [Homo sapiens]
axo10444-f_at	8.49	6.67	3.53	1.25e-07	2.81e-06	SLIT2	slit homolog 2 [Homo sapiens]
axo28284-f_at	5.61	3.79	3.53	4.46e-09	1.5e-07		No Hit
axo06635-f_at	6.31	4.5	3.52	2.52e-05	0.0003	DST	dystonin isoform 4 [Homo sapiens]
axo23311-r_at	8.31	6.49	3.52	2.93e-15	6e-13		PREDICTED: hypothetical protein [Taeniopygia guttata]
axo07377-r_at	8.25	6.44	3.52	2.23e-05	0.0002	IGFBP5	insulin-like growth factor binding protein 5 [Homo sapiens]
axo20130-f_at	7.74	5.93	3.51	1.61e-10	8.43e-09	SH3KBP1	SH3-domain kinase binding protein 1 isoform b [Homo sapiens]
axo08487-r_at	10.92	9.11	3.51	1.66e-13	2.12e-11	MAPK6	mitogen-activated protein kinase 6 [Homo sapiens]
axo11843-r_at	10.31	8.51	3.49	4.6e-09	1.54e-07	PLTP	phospholipid transfer protein isoform a precursor [Homo sapiens]
axo01092-f_at	9.25	7.46	3.48	7.49e-15	1.41e-12	2022-09-10	septin 10 isoform 1 [Homo sapiens]
axo06840-f_at	7.65	5.85	3.48	9.87e-07	1.66e-05	ROBO1	roundabout 1 isoform d [Homo sapiens]
axo24100-f_at	6.4	4.6	3.47	1.73e-05	0.0002		PREDICTED: similar to leucine rich repeat containing 32 [Taeniopygia guttata]
axo15270-f_at	8.52	6.73	3.47	2.9e-06	4.26e-05	CD207	CD207 antigen, langerin [Homo sapiens]
axo27164-f_at	10.78	8.99	3.47	1.08e-11	8.02e-10		No Hit
axo11193-r_at	8.49	6.71	3.44	1.39e-09	5.51e-08	LGALS3BP	galectin 3 binding protein [Homo sapiens]
axo25036-f_at	11.09	9.31	3.44	8.25e-15	1.52e-12		No Hit
axo11014-r_at	6.76	4.98	3.43	4.77e-10	2.12e-08	MYCN	v-myc myelocytomatosis viral related oncogene, neuroblastoma derived [Homo sapiens]
axo16956-r_at	8.74	6.96	3.42	1.34e-10	7.25e-09	ASAP1	development and differentiation enhancing factor 1 [Homo sapiens]
axo07201-f_at	9.51	7.74	3.41	7.84e-09	2.48e-07	ECM2	extracellular matrix protein 2 precursor [Homo sapiens]
axo28051-f_at	10.39	8.62	3.4	1.09e-14	1.92e-12		No Hit
axo08196-f_at	6.63	4.87	3.39	1.46e-05	0.0002	MRC1	mannose receptor C type 1 precursor [Homo sapiens]
axo19712-f_at	8.26	6.5	3.39	0.0003	0.002	EMILIN2	elastin microfibril interfacer 2 [Homo sapiens]
axo24588-f_at	9.05	7.29	3.38	5.66e-05	0.0006		No Hit
axo17780-f_s_at	8.92	7.16	3.38	2.25e-13	2.76e-11	LSP1	lymphocyte-specific protein 1 isoform 2 [Homo sapiens]
axo08979-f_at	8.5	6.75	3.37	3.75e-05	0.0004	TIMP1	tissue inhibitor of metalloproteinase 1 precursor [Homo sapiens]
axo12165-f_at	7.2	5.44	3.37	0.0002	0.0018	ASTL	astacin-like metalloendopeptidase [Homo sapiens]
axo10696-r_at	8.32	6.57	3.37	1.52e-06	2.43e-05	SERPINB10	serine (or cysteine) proteinase inhibitor, clade B (ovalbumin), member 10 [Homo sapiens]
axo01279-f_at	10.22	8.48	3.34	4.66e-06	6.47e-05	UCMA	upper zone of growth plate and cartilage matrix associated [Homo sapiens]
axo30941-f_at	8.66	6.92	3.34	8.06e-05	0.0008		No Hit
axo20128-f_at	6.75	5.02	3.33	2.09e-09	7.83e-08	SH3KBP1	SH3-domain kinase binding protein 1 isoform b [Homo sapiens]
axo12103-f_at	6.12	4.38	3.32	1.15e-09	4.68e-08	CDC42EP3	Cdc42 effector protein 3 [Homo sapiens]
axo24880-f_at	10.04	8.31	3.32	1.73e-12	1.67e-10		No Hit
axo19969-f_at	7.94	6.21	3.32	0.0042	0.0215	PHF6	PHD finger protein 6 isoform 1 [Homo sapiens]
axo08961-f_at	8.02	6.29	3.31	2.43e-08	6.73e-07	TGFBR2	transforming growth factor, beta receptor II isoform B precursor [Homo sapiens]
axo08309-f_at	8.85	7.13	3.3	2.47e-07	5.03e-06	ODC1	ornithine decarboxylase 1 [Homo sapiens]
axo16074-f_at	6.07	4.35	3.29	0.0102	0.0442	DIRAS2	Di-Ras2 [Homo sapiens]
axo10222-r_at	6.1	4.39	3.29	5.86e-07	1.06e-05	ROR2	receptor tyrosine kinase-like orphan receptor 2 precursor [Homo sapiens]
axo02443-f_at	9.7	7.99	3.28	3.22e-05	0.0003	TUBB2B	tubulin, beta 2B [Homo sapiens]
axo08202-f_at	6.72	5.01	3.26	2.69e-10	1.29e-08	MSI1	musashi 1 [Homo sapiens]
axo12644-f_at	6.27	4.56	3.26	3.61e-07	6.97e-06	KERA	keratocan [Homo sapiens]
axo02347-f_at	9.79	8.08	3.26	9.75e-12	7.31e-10	SMOX	polyamine oxidase isoform 1 [Homo sapiens]
axo03042-r_at	7.04	5.34	3.24	2.65e-09	9.57e-08	FLRT3	fibronectin leucine rich transmembrane protein 3 precursor [Homo sapiens]
axo10697-f_at	11.68	9.98	3.24	6.55e-13	6.95e-11	SERPINB10	serine (or cysteine) proteinase inhibitor, clade B (ovalbumin), member 10 [Homo sapiens]
axo08200-f_at	8.52	6.82	3.24	0.0067	0.0313	MRC1	mannose receptor C type 1 precursor [Homo sapiens]
axo28080-f_at	6.65	4.96	3.23	3.88e-11	2.39e-09		No Hit
axo28043-f_at	10.82	9.13	3.22	3.94e-10	1.79e-08		No Hit
axo28354-f_at	12.08	10.4	3.21	1.46e-12	1.45e-10		No Hit
axo00809-f_at	9.5	7.82	3.2	1.77e-10	9.11e-09	PPP1R14B	protein phosphatase 1 regulatory subunit 14B [Homo sapiens]
axo23906-f_at	7.91	6.23	3.19	0.0016	0.0095		unnamed protein product [Tetraodon nigroviridis]
axo29432-f_at	9.23	7.56	3.17	8.03e-14	1.13e-11		No Hit
axo31695-f_at	10.88	9.21	3.17	4.34e-12	3.57e-10		No Hit
axo11739-f_at	6	4.34	3.17	2.94e-13	3.49e-11	BMP1	bone morphogenetic protein 1 isoform 3 precursor [Homo sapiens]
axo18150-r_at	7.3	5.64	3.17	9.84e-11	5.55e-09	TMEM35	transmembrane protein 35 [Homo sapiens]
axo08094-f_at	6.87	5.21	3.17	4.13e-10	1.87e-08	LMO1	LIM domain only 1 [Homo sapiens]
axo11707-f_at	6.88	5.21	3.16	0.0344	0.1156	PRG3	proteoglycan 3 [Homo sapiens]
axo10791-f_at	6.96	5.31	3.16	2.72e-15	5.63e-13	COL7A1	alpha 1 type VII collagen precursor [Homo sapiens]
axo07830-f_at	6.92	5.26	3.15	7.1e-08	1.73e-06	FN1	fibronectin 1 isoform 3 preproprotein [Homo sapiens]
axo11262-f_at	10.82	9.17	3.13	6.13e-08	1.52e-06	KLF10	Kruppel-like factor 10 isoform a [Homo sapiens]
axo16835-f_at	7.8	6.16	3.12	2.31e-11	1.56e-09	FGD6	FYVE, RhoGEF and PH domain containing 6 [Homo sapiens]
axo07537-f_at	6.21	4.57	3.12	0.0002	0.0016	DST	dystonin isoform 1e precursor [Homo sapiens]
axo10449-f_at	8.78	7.14	3.12	0.0033	0.0172	ITGBL1	integrin, beta-like 1 (with EGF-like repeat domains) [Homo sapiens]
axo00173-f_at	9.43	7.8	3.1	1.01e-13	1.34e-11	PLEKHG4B	pleckstrin homology domain containing, family G (with RhoGef domain) member 4B [Homo sapiens]
axo05602-f_at	6.57	4.94	3.09	9.23e-10	3.86e-08	ZNF469	zinc finger protein 469 [Homo sapiens]
axo24313-f_at	6.75	5.13	3.08	1.61e-05	0.0002		OTTXETP00000002159 [Xenopus tropicalis]
axo06341-f_at	10.2	8.58	3.08	1.94e-11	1.33e-09	SERPINE2	plasminogen activator inhibitor type 1, member 2 isoform c precursor [Homo sapiens]
axo24073-f_at	12.16	10.54	3.07	2.63e-06	3.92e-05		Placenta-specific gene 8 protein [Oncorhynchus mykiss]
axo29400-f_at	9.85	8.24	3.07	1.1e-13	1.45e-11		No Hit
axo20490-f_s_at	12.48	10.87	3.06	1.76e-05	0.0002	CIRBP	cold inducible RNA binding protein [Homo sapiens]
axo27991-f_at	9.16	7.54	3.06	2.92e-12	2.6e-10		No Hit
axo06340-f_at	10.76	9.15	3.06	3.37e-15	6.83e-13	SERPINE2	plasminogen activator inhibitor type 1, member 2 isoform c precursor [Homo sapiens]
axo16307-f_s_at	9.18	7.57	3.06	4.7e-10	2.1e-08	RNF125	ring finger protein 125 [Homo sapiens]
axo13050-f_at	9.32	7.71	3.06	2.94e-11	1.92e-09	RRAS2	related RAS viral (r-ras) oncogene homolog 2 isoform a [Homo sapiens]
axo19104-r_at	8.96	7.35	3.06	1.82e-08	5.21e-07	GPR177	G protein-coupled receptor 177 isoform 1 [Homo sapiens]
axo13570-r_at	10.35	8.74	3.05	8.48e-15	1.55e-12	RGS10	regulator of G-protein signaling 10 isoform a [Homo sapiens]
axo29759-f_at	12.08	10.48	3.04	2.23e-14	3.58e-12		No Hit
axo04796-f_at	6.48	4.88	3.04	4.05e-08	1.06e-06	ADORA3	adenosine A3 receptor isoform 3 [Homo sapiens]
axo00383-f_at	6.56	4.96	3.04	1.25e-07	2.79e-06	COL12A1	collagen, type XII, alpha 1 short isoform precursor [Homo sapiens]
axo15271-r_at	10.68	9.08	3.03	1.88e-08	5.39e-07	CD207	CD207 antigen, langerin [Homo sapiens]
axo03466-r_at	7.75	6.16	3.02	7.02e-08	1.71e-06	QKI	quaking homolog, KH domain RNA binding isoform HQK-7B [Homo sapiens]
axo11749-r_at	9.54	7.95	3.01	2.77e-12	2.48e-10	PIM3	pim-3 oncogene [Homo sapiens]
axo16955-r_at	9.51	7.94	2.98	1.6e-11	1.13e-09	ASAP1	development and differentiation enhancing factor 1 [Homo sapiens]
axo00098-f_at	6.73	5.16	2.98	6.41e-07	1.14e-05	COL4A6	type IV alpha 6 collagen isoform B precursor [Homo sapiens]
axo13478-f_at	6.38	4.81	2.98	0.0134	0.0549	C13orf15	response gene to complement 32 [Homo sapiens]
axo07098-f_at	11.16	9.59	2.97	1.58e-07	3.43e-06	CLDN4	claudin 4 [Homo sapiens]
axo19273-f_at	6.87	5.3	2.97	0.0002	0.0013	NINL	ninein-like [Homo sapiens]
axo15268-f_at	10.64	9.08	2.95	6.68e-05	0.0006	G0S2	G0G1switch 2 [Homo sapiens]
axo04782-f_at	8.36	6.8	2.95	3.94e-13	4.45e-11	DSE	dermatan sulfate epimerase precursor [Homo sapiens]
axo09996-f_at	6.72	5.16	2.95	5.69e-08	1.42e-06	CEACAM5	carcinoembryonic antigen-related cell adhesion molecule 5 preproprotein [Homo sapiens]
axo08765-f_at	7.75	6.19	2.95	0.0074	0.0339	SFTPD	pulmonary surfactant-associated protein D precursor [Homo sapiens]
axo27711-f_at	4.92	3.37	2.95	1.65e-09	6.34e-08		No Hit
axo19913-r_at	11.48	9.93	2.94	3.61e-09	1.24e-07	C5orf4	hypothetical protein LOC10826 isoform 2 [Homo sapiens]
axo07301-r_at	8.91	7.35	2.94	2.46e-08	6.78e-07	FZD2	frizzled 2 [Homo sapiens]
axo26046-f_at	7.28	5.73	2.94	6.97e-09	2.22e-07		No Hit
axo15874-f_at	8.97	7.42	2.93	1.23e-07	2.76e-06	TLR7	toll-like receptor 7 [Homo sapiens]
axo26905-f_at	11.34	9.79	2.93	7.02e-11	4.09e-09		No Hit
axo27419-f_at	9.8	8.25	2.92	2.28e-12	2.09e-10		No Hit
axo19399-r_at	11.56	10.02	2.92	3.94e-21	3.6e-18	NPL	N-acetylneuraminate pyruvate lyase [Homo sapiens]
axo08148-r_at	5.89	4.35	2.91	5.08e-06	6.99e-05	MATN2	matrilin 2 isoform a precursor [Homo sapiens]
axo31303-f_x_at	6.24	4.7	2.91	2.29e-05	0.0003		No Hit
axo25276-f_at	8.43	6.89	2.9	2.67e-09	9.59e-08		No Hit
axo26086-f_at	6.97	5.44	2.89	8.98e-08	2.11e-06		No Hit
axo06499-f_at	8.92	7.4	2.87	0.0193	0.0736	C1QB	complement component 1, q subcomponent, B chain precursor [Homo sapiens]
axo13794-f_at	5.95	4.44	2.86	2.46e-10	1.2e-08	SRPX2	sushi-repeat-containing protein, X-linked 2 [Homo sapiens]
axo02272-r_at	5.45	3.93	2.86	3.18e-09	1.12e-07	KAL1	Kallmann syndrome 1 protein precursor [Homo sapiens]
axo18832-f_at	11.44	9.93	2.86	4.6e-15	8.97e-13	TNFAIP8L2	tumor necrosis factor, alpha-induced protein 8-like 2 [Homo sapiens]
axo14587-f_at	7.38	5.87	2.86	7.01e-08	1.71e-06	PLXND1	plexin D1 [Homo sapiens]
axo03488-f_at	11.09	9.58	2.86	2.86e-07	5.66e-06	MPEG1	macrophage expressed gene 1 [Homo sapiens]
axo19264-r_at	7.01	5.49	2.85	1.07e-07	2.44e-06	CXorf21	hypothetical protein LOC80231 [Homo sapiens]
axo02098-f_at	10.29	8.78	2.85	1.52e-09	5.95e-08	GLUL	glutamine synthetase [Homo sapiens]
axo03096-r_at	7.08	5.57	2.85	2.4e-08	6.67e-07	GALNTL4	UDP-N-acetyl-alpha-D-galactosamine:polypeptide N-acetylgalactosaminyltransferase-like 4 [Homo sapiens]
axo10775-r_at	8.34	6.84	2.84	0.0018	0.0106	ISG15	ISG15 ubiquitin-like modifier [Homo sapiens]
axo13210-r_s_at	6.85	5.35	2.83	4.06e-07	7.68e-06	RSU1	ras suppressor protein 1 isoform 1 [Homo sapiens]
axo07326-r_at	8.12	6.62	2.82	0.0003	0.0023	GMDS	GDP-mannose 4,6-dehydratase [Homo sapiens]
axo07287-f_at	9.9	8.41	2.82	0.0012	0.0074	FHL1	four and a half LIM domains 1 isoform 2 [Homo sapiens]
axo13183-r_at	6.52	5.03	2.82	0.0101	0.0439	PLXNB2	plexin B2 [Homo sapiens]
axo18911-f_at	6.56	5.06	2.82	2.7e-08	7.41e-07	GAL3ST4	galactose-3-O-sulfotransferase 4 [Homo sapiens]
axo03758-f_at	8.37	6.87	2.81	3.44e-06	4.96e-05		PREDICTED: similar to hCG22561 [Homo sapiens]
axo23985-f_at	12.46	10.97	2.81	0.0002	0.0014		hypothetical protein LOC100005405 [Danio rerio]
axo11554-f_at	7.8	6.31	2.81	1.36e-10	7.3e-09	MTHFR	5,10-methylenetetrahydrofolate reductase (NADPH) [Homo sapiens]
axo25450-f_at	6.98	5.49	2.81	8.94e-09	2.81e-07		No Hit
axo09108-f_at	8.63	7.15	2.8	2.19e-05	0.0002	VIM	vimentin [Homo sapiens]
axo08466-f_at	11.77	10.29	2.8	9.99e-09	3.1e-07	SRGN	serglycin precursor [Homo sapiens]
axo10102-r_at	9.7	8.22	2.8	0.0044	0.0219	FAP	fibroblast activation protein, alpha subunit [Homo sapiens]
axo04732-f_at	8.15	6.67	2.79	2.16e-10	1.08e-08	VWC2L	von Willebrand factor C domain-containing protein 2-like [Homo sapiens]
axo13561-f_at	5.88	4.4	2.78	4.48e-09	1.5e-07	IMPA2	inositol(myo)-1(or 4)-monophosphatase 2 [Homo sapiens]
axo04822-f_at	7.4	5.92	2.77	3.27e-05	0.0003	AADAC	arylacetamide deacetylase [Homo sapiens]
axo04458-f_at	6.12	4.65	2.77	0.0272	0.0965	TOP2B	DNA topoisomerase II, beta isozyme [Homo sapiens]
axo29867-f_at	12.22	10.75	2.77	8.1e-06	0.0001		No Hit
axo10049-r_at	12.25	10.78	2.76	1.63e-05	0.0002	DSP	desmoplakin isoform I [Homo sapiens]
axo00504-f_at	7.11	5.64	2.76	4.25e-09	1.44e-07	PTPRS	protein tyrosine phosphatase, receptor type, sigma isoform 4 precursor [Homo sapiens]
axo29450-f_at	9.9	8.44	2.76	1.33e-10	7.19e-09		No Hit
axo20198-f_at	6.77	5.3	2.76	9.78e-05	0.0009	RERG	RAS-like, estrogen-regulated, growth inhibitor [Homo sapiens]
axo10896-f_at	8.61	7.15	2.75	3.53e-09	1.22e-07	ELK3	ELK3 protein [Homo sapiens]
axo12462-f_at	5.71	4.25	2.74	6.72e-06	8.84e-05	PKIA	cAMP-dependent protein kinase inhibitor alpha isoform 6 [Homo sapiens]
axo01888-r_at	6.49	5.04	2.74	5.56e-08	1.4e-06	EVC	Ellis van Creveld syndrome protein [Homo sapiens]
axo26908-f_at	10.39	8.94	2.73	2e-16	5.82e-14		No Hit
axo12732-f_at	9.57	8.13	2.71	4.43e-15	8.72e-13	SMAD1	Sma- and Mad-related protein 1 [Homo sapiens]
axo09530-f_at	11.7	10.26	2.71	7.09e-15	1.34e-12	LTA4H	leukotriene A4 hydrolase [Homo sapiens]
axo14583-f_at	5.85	4.41	2.71	0.0007	0.0048	GLT25D2	glycosyltransferase 25 domain containing 2 [Homo sapiens]
axo18342-r_at	9.42	7.99	2.69	6.34e-07	1.13e-05	C10orf54	platelet receptor Gi24 [Homo sapiens]
axo29288-f_at	10.17	8.75	2.69	1.99e-05	0.0002		No Hit
axo08692-f_at	5.42	3.99	2.69	4.1e-05	0.0004	CYP26A1	cytochrome P450, family 26, subfamily A, polypeptide 1 isoform 1 [Homo sapiens]
axo06057-r_at	8.54	7.11	2.69	0.0001	0.001	RTL1	retrotransposon-like 1 [Homo sapiens]
axo07231-f_at	10.18	8.75	2.68	2.86e-07	5.66e-06	SLC11A1	natural resistance-associated macrophage protein 1 [Homo sapiens]
axo04909-r_at	7.76	6.33	2.68	1.39e-08	4.15e-07	GPR34	G protein-coupled receptor 34 [Homo sapiens]
axo25133-f_at	8.79	7.37	2.68	1.1e-12	1.11e-10		No Hit
axo16150-f_at	8.55	7.15	2.65	1.77e-06	2.77e-05	FERMT1	kindlin-1 [Homo sapiens]
axo01457-f_at	6.87	5.47	2.65	5.02e-08	1.27e-06	SLC43A2	solute carrier family 43, member 2 [Homo sapiens]
axo06399-f_at	5.64	4.23	2.65	1.26e-07	2.83e-06	TMEM67	meckelin isoform 2 [Homo sapiens]
axo16618-f_at	8.51	7.11	2.64	9.96e-08	2.3e-06	PTPLAD2	protein tyrosine phosphatase-like A domain containing 2 [Homo sapiens]
axo22480-f_at	8.71	7.31	2.64	2e-06	3.06e-05		PREDICTED: similar to RhoGTPase regulating protein variant ARHGAP20-1ad [Gallus gallus]
axo12465-r_at	10.08	8.68	2.64	7.64e-10	3.25e-08	CKAP4	cytoskeleton-associated protein 4 [Homo sapiens]
axo29570-f_at	10.25	8.85	2.64	2e-11	1.37e-09		No Hit
axo28909-f_at	7.22	5.82	2.64	0.0086	0.0383		No Hit
axo20006-r_at	9.93	8.54	2.63	3.8e-07	7.25e-06	TUBB6	tubulin, beta 6 [Homo sapiens]
axo05303-f_at	7.86	6.47	2.62	7.92e-07	1.37e-05	ACP5	acid phosphatase 5, tartrate resistant precursor [Homo sapiens]
axo30648-f_at	6.96	5.57	2.62	4.98e-06	6.85e-05		No Hit
axo20695-f_s_at	14.25	12.86	2.62	6.49e-11	3.81e-09	VIM	vimentin [Homo sapiens]
axo08662-r_at	10	8.62	2.62	2.24e-07	4.63e-06	RCN1	reticulocalbin 1 precursor [Homo sapiens]
axo22243-f_at	5.53	4.15	2.61	0.0034	0.0178		ORF2-encoded protein [Danio rerio]
axo02394-f_at	8.83	7.45	2.61	7.08e-11	4.1e-09	MIDN	midnolin [Homo sapiens]
axo17185-f_at	9.83	8.45	2.6	1.4e-11	1e-09	RHOF	ras homolog gene family, member F [Homo sapiens]
axo28886-f_at	11.32	9.94	2.6	2.31e-08	6.48e-07		No Hit
axo23008-f_at	6.62	5.24	2.6	0.0017	0.0101		LOC100145494 protein [Xenopus tropicalis]
axo29484-f_at	6.79	5.42	2.59	2.29e-07	4.73e-06		No Hit
axo24773-f_at	5.17	3.8	2.58	1.49e-06	2.38e-05		No Hit
axo11616-f_at	7.36	5.99	2.58	0.0002	0.0019	ST8SIA2	ST8 alpha-N-acetyl-neuraminide alpha-2,8-sialyltransferase 2 [Homo sapiens]
axo11320-f_at	10.9	9.53	2.58	3.44e-06	4.97e-05	TSPAN3	transmembrane 4 superfamily member 8 isoform 1 [Homo sapiens]
axo12055-r_at	9.43	8.07	2.58	0.0021	0.0119	GPM6B	glycoprotein M6B isoform 1 [Homo sapiens]
axo18332-r_at	8.22	6.86	2.57	5.26e-06	7.19e-05	SAMSN1	SAM domain, SH3 domain and nuclear localization signals, 1 [Homo sapiens]
axo30895-f_at	4.53	3.17	2.57	0.0281	0.0991		No Hit
axo02424-f_at	9.6	8.24	2.56	1.4e-06	2.27e-05	SULT2B1	sulfotransferase family, cytosolic, 2B, member 1 isoform b [Homo sapiens]
axo15875-f_at	5.76	4.4	2.56	0.0002	0.002	TLR7	toll-like receptor 7 [Homo sapiens]
axo09521-f_at	7.58	6.23	2.56	2.4e-05	0.0003	TNFSF10	tumor necrosis factor (ligand) superfamily, member 10 [Homo sapiens]
axo31320-f_at	6.5	5.14	2.55	8.43e-07	1.45e-05		No Hit
axo08076-r_at	12.69	11.34	2.55	3.36e-07	6.52e-06	ANXA1	annexin I [Homo sapiens]
axo09178-f_at	6.22	4.87	2.55	0.0011	0.0071	SCG2	secretogranin II precursor [Homo sapiens]
axo22273-r_at	9.18	7.83	2.55	3.31e-12	2.83e-10		PREDICTED: similar to Arginineproline rich coiled-coil 1 [Gallus gallus]
axo01840-f_at	7.66	6.32	2.54	5.08e-07	9.36e-06	LRIG3	leucine-rich repeats and immunoglobulin-like domains 3 isoform 2 [Homo sapiens]
axo11691-r_s_at	12.46	11.12	2.53	2.59e-11	1.7e-09	TUBA1B	tubulin, alpha, ubiquitous [Homo sapiens]
axo05852-f_at	7.52	6.18	2.53	2.08e-05	0.0002	VRK2	vaccinia related kinase 2 isoform 1 [Homo sapiens]
axo28778-f_at	8.61	7.27	2.52	9e-08	2.12e-06		No Hit
axo04319-f_at	9.45	8.12	2.51	6.71e-11	3.93e-09	ABHD12	abhydrolase domain containing 12 isoform a [Homo sapiens]
axo08971-f_at	6.92	5.59	2.51	0.0236	0.0864	THBS4	thrombospondin 4 precursor [Homo sapiens]
axo00239-f_at	7.45	6.12	2.51	1.1e-11	8.15e-10	ZNF518B	zinc finger protein 518B [Homo sapiens]
axo09429-f_at	6.44	5.12	2.51	0.0002	0.0014	OASL	2'-5'-oligoadenylate synthetase-like isoform a [Homo sapiens]
axo24828-f_at	11.48	10.15	2.51	3.43e-11	2.18e-09		No Hit
axo18736-f_at	5.62	4.3	2.51	0.0239	0.0874	MMP28	matrix metalloproteinase 28 isoform 1 preproprotein [Homo sapiens]
axo16617-f_at	9.98	8.66	2.5	8.67e-08	2.04e-06	PTPLAD2	protein tyrosine phosphatase-like A domain containing 2 [Homo sapiens]
axo17885-f_at	10.25	8.93	2.5	2.01e-10	1.01e-08	NIN	ninein isoform 2 [Homo sapiens]
axo27697-f_at	6	4.69	2.49	4.52e-06	6.31e-05		No Hit
axo05127-f_at	5.18	3.87	2.48	2.83e-07	5.64e-06	VSIG4	V-set and immunoglobulin domain containing 4 isoform 2 [Homo sapiens]
axo02980-f_at	9.61	8.3	2.48	4.83e-08	1.23e-06	TYROBP	TYRO protein tyrosine kinase binding protein isoform 2 precursor [Homo sapiens]
axo18218-r_at	6.08	4.77	2.48	3.08e-07	6.04e-06	BCAN	brevican isoform 1 [Homo sapiens]
axo30307-f_at	7.13	5.82	2.48	1.71e-06	2.68e-05		No Hit
axo04374-f_at	7.66	6.36	2.46	2.24e-05	0.0002	ARHGAP24	Rho GTPase activating protein 24 isoform 3 [Homo sapiens]
axo31660-f_at	7.35	6.05	2.46	2.01e-07	4.22e-06		No Hit
axo24531-f_at	5.68	4.38	2.46	1.37e-08	4.1e-07		No Hit
axo16523-f_at	8.31	7.02	2.46	1.78e-05	0.0002	XKR8	XK, Kell blood group complex subunit-related family, member 8 [Homo sapiens]
axo30725-f_at	9.21	7.92	2.45	1.02e-06	1.72e-05		No Hit
axo08060-f_at	5.93	4.64	2.45	0.0003	0.0023	LAMB1	laminin, beta 1 precursor [Homo sapiens]
axo27517-f_at	8.02	6.73	2.45	1.39e-05	0.0002		No Hit
axo29349-f_at	7.22	5.93	2.44	0.0388	0.1261		No Hit
axo29893-f_at	7.16	5.87	2.44	2.22e-13	2.73e-11		No Hit
axo09722-f_at	13.6	12.31	2.44	1.24e-13	1.62e-11	ANXA2	annexin A2 isoform 2 [Homo sapiens]
axo15187-r_at	5.86	4.58	2.43	3.57e-10	1.63e-08	C1QTNF5	C1q and tumor necrosis factor related protein 5 precursor [Homo sapiens]
axo06327-f_at	9.63	8.35	2.43	9.88e-08	2.29e-06	LITAF	lipopolysaccharide-induced TNF-alpha factor isoform 1 [Homo sapiens]
axo24045-r_at	7.85	6.57	2.43	5.84e-12	4.63e-10		PREDICTED: similar to LDL receptor related protein 105 [Gallus gallus]
axo18819-f_at	5.6	4.32	2.43	7.61e-06	9.83e-05	RIC3	resistance to inhibitors of cholinesterase 3 homolog isoform a [Homo sapiens]
axo30119-f_at	8.46	7.18	2.42	6.34e-05	0.0006		No Hit
axo24261-f_at	4.86	3.58	2.41	1.49e-05	0.0002		PREDICTED: similar to 2-aminoadipic 6-semialdehyde dehydrogenase [Gallus gallus]
axo03355-f_at	8.1	6.84	2.41	3.07e-13	3.6e-11	IKIP	IKK interacting protein isoform 2 [Homo sapiens]
axo10483-f_at	6.08	4.82	2.41	3.36e-07	6.52e-06	CYP7B1	cytochrome P450, family 7, subfamily B, polypeptide 1 [Homo sapiens]
axo07872-f_at	10.66	9.4	2.4	2.82e-12	2.52e-10	GNAI2	guanine nucleotide binding protein (G protein), alpha inhibiting activity polypeptide 2 [Homo sapiens]
axo27729-f_at	4.73	3.47	2.4	2.19e-10	1.1e-08		No Hit
axo01890-f_at	11.09	9.83	2.4	3.91e-13	4.44e-11	JAG1	jagged 1 precursor [Homo sapiens]
axo01625-f_at	7.77	6.51	2.39	6.43e-10	2.78e-08	TMEM154	transmembrane protein 154 [Homo sapiens]
axo17264-f_at	9.11	7.85	2.39	1.8e-11	1.25e-09	MOSPD1	motile sperm domain containing 1 [Homo sapiens]
axo09579-f_at	5.71	4.46	2.38	1.32e-08	3.96e-07	WISP1	WNT1 inducible signaling pathway protein 1 isoform 1 precursor [Homo sapiens]
axo09901-f_at	8.42	7.17	2.38	1.65e-06	2.61e-05	LY86	MD-1, RP105-associated [Homo sapiens]
axo24975-f_at	7.42	6.17	2.38	3.91e-09	1.33e-07		No Hit
axo28476-f_at	9.98	8.74	2.37	9.52e-12	7.19e-10		No Hit
axo24390-f_at	6.08	4.84	2.36	9.93e-10	4.1e-08		LOC100170625 protein [Xenopus tropicalis]
axo24847-f_at	6.98	5.74	2.36	3.37e-06	4.87e-05		No Hit
axo01351-f_at	9.13	7.89	2.36	6.84e-10	2.95e-08	FAM110B	hypothetical protein LOC90362 [Homo sapiens]
axo05207-f_at	6.46	5.22	2.36	2.16e-08	6.1e-07	NTF3	neurotrophin 3 isoform 1 preproprotein [Homo sapiens]
axo16203-f_at	7.49	6.25	2.36	0.0002	0.0014	MS4A12	membrane-spanning 4-domains, subfamily A, member 12 [Homo sapiens]
axo24541-f_at	5.09	3.86	2.36	2.97e-08	8.05e-07		No Hit
axo18652-f_at	8.5	7.27	2.36	4.46e-07	8.35e-06	GPR87	G protein-coupled receptor 87 [Homo sapiens]
axo04823-f_at	10.74	9.51	2.35	0.0003	0.0024	AADAC	arylacetamide deacetylase [Homo sapiens]
axo29076-f_at	12.12	10.89	2.35	1.63e-11	1.14e-09		No Hit
axo27674-f_at	7.34	6.11	2.35	2.54e-05	0.0003		No Hit
axo15467-r_at	13.15	11.92	2.35	7.4e-13	7.78e-11	LGMN	legumain preproprotein [Homo sapiens]
axo08661-f_at	12.39	11.16	2.35	1.91e-08	5.47e-07	RCN1	reticulocalbin 1 precursor [Homo sapiens]
axo12009-f_at	10.23	9	2.34	7.77e-15	1.44e-12	CRTAP	cartilage associated protein precursor [Homo sapiens]
axo10493-f_at	6.32	5.1	2.34	9.4e-05	0.0009	NCR2	natural cytotoxicity triggering receptor 2 [Homo sapiens]
axo07083-r_at	6.89	5.67	2.34	3.75e-06	5.34e-05	DCX	doublecortin isoform a [Homo sapiens]
axo31597-f_s_at	5.16	3.94	2.33	3.75e-05	0.0004		No Hit
axo01062-f_at	11.02	9.8	2.33	2.18e-08	6.14e-07	OTOA	otoancorin isoform 1 [Homo sapiens]
axo29490-f_at	11.25	10.03	2.33	7.29e-10	3.14e-08		No Hit
axo12896-f_at	8.12	6.9	2.33	4.38e-07	8.21e-06	LAMB4	laminin, beta 4 [Homo sapiens]
axo05289-f_at	8.11	6.89	2.33	0.0014	0.0084	GJB6	gap junction protein, beta 6 [Homo sapiens]
axo27945-f_at	7.91	6.7	2.32	1.88e-07	3.97e-06		No Hit
axo25206-f_at	9.77	8.56	2.32	2.75e-11	1.8e-09		No Hit
axo10115-f_at	10.59	9.38	2.31	8.8e-12	6.74e-10	GALNT2	polypeptide N-acetylgalactosaminyltransferase 2 [Homo sapiens]
axo15825-r_at	10.79	9.58	2.31	4.66e-06	6.47e-05	NT5C3	5'-nucleotidase, cytosolic III isoform 2 [Homo sapiens]
axo15932-r_at	6.02	4.81	2.31	0.0055	0.0267	CLSTN1	calsyntenin 1 isoform 1 [Homo sapiens]
axo01756-f_at	9.9	8.69	2.31	1.1e-10	6.09e-09	FAM26D	hypothetical protein LOC221301 [Homo sapiens]
axo15667-r_at	7.01	5.8	2.31	2.79e-06	4.12e-05	PLEKHO1	pleckstrin homology domain containing, family O member 1 [Homo sapiens]
axo15327-f_at	5.22	4.01	2.31	0.0004	0.0031	STMN3	SCG10-like-protein [Homo sapiens]
axo15974-f_at	6.14	4.94	2.31	3.26e-06	4.74e-05	DUOX1	dual oxidase 1 precursor [Homo sapiens]
axo25672-f_at	6.03	4.83	2.31	0.0002	0.0014		No Hit
axo23122-f_at	6.33	5.12	2.3	0.0491	0.1511		PREDICTED: ras responsive element binding protein 1 [Taeniopygia guttata]
axo31559-f_at	9.86	8.66	2.3	5.74e-12	4.59e-10		No Hit
axo26108-f_at	5.61	4.41	2.3	8.97e-06	0.0001		No Hit
axo17022-f_at	7.82	6.62	2.3	1.04e-11	7.76e-10	ZC4H2	zinc finger, C4H2 domain containing [Homo sapiens]
axo02833-r_at	8.33	7.13	2.3	3.63e-07	6.98e-06	DLGAP4	disks large-associated protein 4 isoform b [Homo sapiens]
axo07286-f_at	9.49	8.29	2.3	1.09e-10	6.04e-09	GPC4	glypican 4 [Homo sapiens]
axo28142-f_at	7.44	6.24	2.3	7.57e-08	1.83e-06		No Hit
axo22371-r_at	8.45	7.25	2.3	0.0007	0.0045		PREDICTED: similar to myeloid cathelicidin 3, partial [Ornithorhynchus anatinus]
axo00380-f_at	8.04	6.85	2.3	0.0001	0.0009	UPF3B	UPF3 regulator of nonsense transcripts homolog B isoform 1 [Homo sapiens]
axo27691-f_at	7.3	6.1	2.29	1.92e-06	2.96e-05		No Hit
axo13859-f_at	7.43	6.23	2.29	2.22e-05	0.0002	SCHIP1	schwannomin interacting protein 1 [Homo sapiens]
axo09000-r_at	8.33	7.13	2.29	5.71e-06	7.74e-05	GPR137B	G protein-coupled receptor 137B [Homo sapiens]
axo10048-f_at	8.78	7.59	2.29	0.0001	0.0009	DSP	desmoplakin isoform I [Homo sapiens]
axo27803-f_at	5.47	4.27	2.29	2.49e-06	3.72e-05		No Hit
axo00682-r_at	5.85	4.66	2.28	0.0001	0.0009	ABHD3	alphabeta hydrolase domain containing protein 3 [Homo sapiens]
axo08555-f_at	5.62	4.43	2.28	0.0128	0.053	CYP2A13	cytochrome P450, family 2, subfamily A, polypeptide 13 [Homo sapiens]
axo03614-f_at	7.21	6.02	2.28	1e-08	3.1e-07	KREMEN1	kringle-containing transmembrane protein 1 isoform 3 precursor [Homo sapiens]
axo04651-f_at	7.8	6.62	2.28	0.0002	0.0016	GLT8D4	glycosyltransferase 8 domain containing 4 [Homo sapiens]
axo19900-f_at	7.05	5.87	2.27	2.92e-05	0.0003	FBLIM1	filamin-binding LIM protein-1 isoform c [Homo sapiens]
axo08726-f_at	8.62	7.44	2.27	9.43e-06	0.0001	MAPK12	mitogen-activated protein kinase 12 [Homo sapiens]
axo11741-r_at	8.8	7.61	2.27	9.06e-07	1.54e-05	BMP1	bone morphogenetic protein 1 isoform 3 precursor [Homo sapiens]
axo04997-r_at	7.98	6.8	2.27	2.33e-11	1.57e-09	FAM89B	family with sequence similarity 89, member B isoform 1 [Homo sapiens]
axo25612-f_at	7.83	6.65	2.27	6.87e-06	8.99e-05		No Hit
axo13227-f_at	9.2	8.03	2.26	9.88e-07	1.66e-05	STEAP1	six transmembrane epithelial antigen of the prostate [Homo sapiens]
axo30043-f_at	5.98	4.8	2.26	4.93e-06	6.79e-05		No Hit
axo30715-f_at	6.82	5.65	2.25	2.64e-09	9.56e-08		No Hit
axo02052-f_at	5.81	4.64	2.25	5.13e-07	9.44e-06	TGIF1	TG-interacting factor isoform b [Homo sapiens]
axo10735-f_at	9.35	8.18	2.25	3.27e-10	1.53e-08	SLC12A4	solute carrier family 12, member 4 isoform a [Homo sapiens]
axo19375-f_at	5.73	4.56	2.24	5.7e-09	1.85e-07	SH3PXD2B	SH3 and PX domains 2B [Homo sapiens]
axo18511-f_at	8.5	7.34	2.24	1.9e-05	0.0002	TNS3	tensin 3 [Homo sapiens]
axo14042-f_at	5.77	4.61	2.24	0.0488	0.1502	SLK	serinethreonine kinase 2 [Homo sapiens]
axo17755-f_at	9.32	8.16	2.24	0.0336	0.1136	ARRDC3	arrestin domain containing 3 [Homo sapiens]
axo11484-f_at	9.98	8.82	2.24	0.0041	0.0206	CD5L	CD5 molecule-like [Homo sapiens]
axo08192-f_at	10.59	9.43	2.23	5.65e-07	1.03e-05	MPP1	palmitoylated membrane protein 1 [Homo sapiens]
axo04863-f_at	8.84	7.68	2.23	9.45e-07	1.6e-05	PLOD1	lysyl hydroxylase 1 precursor [Homo sapiens]
axo30022-f_at	9.41	8.25	2.23	3.82e-10	1.74e-08		No Hit
axo18771-f_at	12.85	11.69	2.22	6.01e-12	4.74e-10	DSC2	desmocollin 2 isoform Dsc2a preproprotein [Homo sapiens]
axo13723-f_at	10.94	9.79	2.22	3.79e-16	1.04e-13	RNF11	ring finger protein 11 [Homo sapiens]
axo10117-f_at	7.86	6.71	2.22	6.42e-08	1.58e-06	GALNT3	polypeptide N-acetylgalactosaminyltransferase 3 [Homo sapiens]
axo02021-r_at	11.29	10.14	2.22	3.64e-06	5.2e-05	C1QC	complement component 1, q subcomponent, C chain precursor [Homo sapiens]
axo26439-f_at	7.34	6.19	2.21	1.61e-06	2.55e-05		No Hit
axo05461-f_at	8.67	7.53	2.21	3.88e-11	2.39e-09	ZBTB1	zinc finger and BTB domain containing 1 isoform 1 [Homo sapiens]
axo28579-f_at	10	8.86	2.21	4.22e-06	5.94e-05		No Hit
axo08566-f_at	8.59	7.45	2.21	3.27e-09	1.15e-07	PTPN6	protein tyrosine phosphatase, non-receptor type 6 isoform 1 [Homo sapiens]
axo08718-f_at	13.68	12.53	2.21	1.34e-14	2.27e-12	S100A10	S100 calcium binding protein A10 [Homo sapiens]
axo18646-f_at	9.12	7.97	2.21	2.24e-09	8.33e-08	FGFR1	fibroblast growth factor receptor 1 isoform 4 precursor [Homo sapiens]
axo31631-f_at	5.75	4.61	2.2	0.0302	0.1044		No Hit
axo26204-f_at	7.79	6.65	2.2	1.91e-07	4.04e-06		No Hit
axo10613-r_at	5.05	3.91	2.2	1.75e-06	2.74e-05	EPYC	dermatan sulfate proteoglycan 3 precursor [Homo sapiens]
axo30756-f_at	11.49	10.35	2.2	0.0003	0.0023		No Hit
axo14751-f_at	9.65	8.52	2.19	1.81e-09	6.89e-08	KIAA0802	hypothetical protein LOC23255 [Homo sapiens]
axo28288-f_at	6.89	5.76	2.19	7.69e-05	0.0007		No Hit
axo31642-f_at	9.17	8.04	2.19	1.29e-09	5.19e-08		No Hit
axo31670-f_at	14.02	12.89	2.19	1.69e-08	4.91e-07		No Hit
axo15910-f_at	9.28	8.16	2.19	8.55e-07	1.47e-05	FAM49B	hypothetical protein LOC51571 [Homo sapiens]
axo14415-r_at	5.67	4.54	2.18	6.9e-05	0.0007	TNIK	TRAF2 and NCK interacting kinase [Homo sapiens]
axo20228-f_at	8.79	7.67	2.18	0.0019	0.0109	TNFRSF6B	tumor necrosis factor receptor superfamily, member 6b [Homo sapiens]
axo26027-f_at	6.34	5.22	2.18	2.85e-06	4.19e-05		No Hit
axo02631-r_at	5.61	4.49	2.18	6.71e-05	0.0006	FAM101A	hypothetical protein LOC144347 [Homo sapiens]
axo19215-f_at	7.86	6.74	2.18	1.23e-06	2.02e-05	ATHL1	ATH1, acid trehalase-like 1 [Homo sapiens]
axo11396-f_at	9.59	8.47	2.17	6.32e-06	8.44e-05	TM6SF2	transmembrane 6 superfamily member 2 [Homo sapiens]
axo08049-f_at	10.57	9.45	2.17	0.0298	0.1035	KRT8	keratin 8 [Homo sapiens]
axo13081-f_at	5.7	4.58	2.17	8.67e-06	0.0001	PXDN	peroxidasin [Homo sapiens]
axo07620-f_at	6.24	5.12	2.17	0.0006	0.004	CHN1	chimerin (chimaerin) 1 isoform a [Homo sapiens]
axo19094-f_at	12.66	11.54	2.17	1.24e-11	9.05e-10	DAPL1	death associated protein-like 1 [Homo sapiens]
axo05485-f_at	8.05	6.94	2.17	7.83e-08	1.88e-06	OSGIN2	oxidative stress induced growth inhibitor family member 2 isoform 1 [Homo sapiens]
axo27310-f_at	6.75	5.64	2.16	7.75e-07	1.35e-05		No Hit
axo25034-f_at	5.13	4.01	2.16	4.32e-08	1.12e-06		No Hit
axo30957-f_at	5.19	4.07	2.16	1.88e-06	2.91e-05		No Hit
axo06752-f_at	10.02	8.91	2.16	3.79e-06	5.4e-05	SLC37A2	solute carrier family 37 (glycerol-3-phosphate transporter), member 2 isoform 2 [Homo sapiens]
axo03504-f_at	6.5	5.39	2.16	1.61e-05	0.0002	RGS19	G protein signalling regulator 19 [Homo sapiens]
axo16896-f_at	5.42	4.31	2.15	0.0146	0.0589	CHST11	carbohydrate sulfotransferase 11 [Homo sapiens]
axo08600-r_at	6.98	5.88	2.15	0.0002	0.0013	RAD1	RAD1 homolog [Homo sapiens]
axo04473-r_at	6.98	5.88	2.15	5.58e-06	7.58e-05	UBTF	upstream binding transcription factor, RNA polymerase I isoform b [Homo sapiens]
axo24666-f_at	8.97	7.87	2.15	0.0014	0.0087		No Hit
axo29567-f_at	9.06	7.96	2.14	1.08e-09	4.42e-08		No Hit
axo05364-r_at	7.29	6.19	2.14	0.0474	0.1471	LIMA1	LIM domain and actin binding 1 isoform a [Homo sapiens]
axo25558-f_at	5.37	4.27	2.14	0.0005	0.0038		No Hit
axo28726-f_at	11.07	9.97	2.14	1.26e-09	5.06e-08		No Hit
axo06472-r_at	8.8	7.7	2.14	3.55e-07	6.87e-06	P4HA2	prolyl 4-hydroxylase, alpha II subunit isoform 1 precursor [Homo sapiens]
axo21339-f_at	11.74	10.64	2.14	1.57e-07	3.41e-06	TUBA1B	tubulin, alpha, ubiquitous [Homo sapiens]
axo21197-f_s_at	14.66	13.57	2.14	2.64e-13	3.19e-11	KRT24	keratin 24 [Homo sapiens]
axo06967-r_at	8.8	7.7	2.13	0.0002	0.0014	CD109	CD109 antigen isoform 3 precursor [Homo sapiens]
axo25834-f_at	8.12	7.03	2.13	0.0042	0.0214		No Hit
axo06111-r_at	8.1	7.01	2.13	0.0089	0.0396	RTL1	retrotransposon-like 1 [Homo sapiens]
axo01363-r_at	13.44	12.35	2.13	4.14e-13	4.58e-11	CTSB	cathepsin B preproprotein [Homo sapiens]
axo12890-f_at	8.33	7.24	2.13	2.56e-11	1.69e-09	GNA12	guanine nucleotide binding protein (G protein) alpha 12 [Homo sapiens]
axo27988-f_at	5.99	4.9	2.13	2.23e-05	0.0002		No Hit
axo08408-f_s_at	9.07	7.98	2.13	2.59e-07	5.24e-06	PKM2	pyruvate kinase, muscle isoform M2 [Homo sapiens]
axo02097-r_at	11.95	10.86	2.12	4.49e-06	6.28e-05	GLUL	glutamine synthetase [Homo sapiens]
axo19494-f_at	6.27	5.19	2.12	1.79e-06	2.8e-05	ADAMTS12	ADAM metallopeptidase with thrombospondin type 1 motif, 12 preproprotein [Homo sapiens]
axo12272-f_s_at	6.58	5.5	2.12	9.96e-06	0.0001	2022-03-08	cellular modulator of immune recognition isoform 7 [Homo sapiens]
axo13918-f_at	4.45	3.37	2.12	2.45e-05	0.0003	ARHGEF10	Rho guanine nucleotide exchange factor 10 [Homo sapiens]
axo03393-f_at	9.66	8.58	2.12	5.02e-07	9.26e-06	PDLIM7	PDZ and LIM domain 7 isoform 2 [Homo sapiens]
axo24725-f_at	6.62	5.54	2.12	5.69e-08	1.42e-06		No Hit
axo08185-f_at	5.41	4.32	2.12	4.77e-05	0.0005	MMP13	matrix metalloproteinase 13 preproprotein [Homo sapiens]
axo13945-f_at	6.58	5.5	2.12	0.0254	0.0916	LPIN2	lipin 2 [Homo sapiens]
axo11397-f_at	8.71	7.63	2.11	8.31e-05	0.0008	TM6SF2	transmembrane 6 superfamily member 2 [Homo sapiens]
axo06700-f_at	9.19	8.11	2.11	9.8e-10	4.06e-08	ITGAV	integrin alpha-V isoform 3 precursor [Homo sapiens]
axo29791-f_at	9.77	8.69	2.11	1.95e-06	2.99e-05		No Hit
axo20014-r_at	8.42	7.35	2.11	7.44e-05	0.0007	C1orf53	hypothetical protein LOC388722 [Homo sapiens]
axo15640-r_at	9.75	8.67	2.11	2.53e-09	9.23e-08	HSD17B14	dehydrogenasereductase (SDR family) member 10 [Homo sapiens]
axo14494-f_at	6.51	5.43	2.11	0.0062	0.0297	PEG10	paternally expressed 10 isoform RF12 [Homo sapiens]
axo21366-f_at	5.14	4.06	2.11	1.06e-08	3.25e-07	HTRA3	HtrA serine peptidase 3 [Homo sapiens]
axo25767-f_at	7.43	6.35	2.11	3.01e-07	5.93e-06		No Hit
axo08940-f_at	6.69	5.62	2.1	1.62e-05	0.0002	TCF3	transcription factor 3 isoform E12 [Homo sapiens]
axo09488-f_at	7.41	6.33	2.1	3.09e-06	4.5e-05	B4GALT3	UDP-Gal:betaGlcNAc beta 1,4- galactosyltransferase 3 [Homo sapiens]
axo05969-f_at	6.07	5	2.1	4.45e-08	1.14e-06	CCNJ	cyclin J isoform 1 [Homo sapiens]
axo25786-f_at	9.93	8.86	2.1	1.66e-06	2.63e-05		No Hit
axo28529-f_at	9.17	8.1	2.1	1.5e-08	4.41e-07		No Hit
axo15444-r_at	7.37	6.3	2.1	8.41e-09	2.65e-07	APH1A	anterior pharynx defective 1 homolog A isoform 2 [Homo sapiens]
axo24339-f_at	9.69	8.62	2.1	3.28e-10	1.53e-08		MGC86483 protein [Xenopus laevis]
axo00641-r_at	8.29	7.23	2.09	2.12e-07	4.43e-06	DCN	decorin isoform a preproprotein [Homo sapiens]
axo29372-f_at	12.85	11.79	2.09	3.16e-12	2.77e-10		No Hit
axo07409-r_at	9.26	8.2	2.09	5.55e-09	1.81e-07	ACTG1	actin, gamma 1 propeptide [Homo sapiens]
axo10491-f_at	8.16	7.1	2.09	6.7e-06	8.83e-05	ABCG2	ATP-binding cassette, sub-family G, member 2 [Homo sapiens]
axo26100-f_at	7.27	6.21	2.09	3.73e-08	9.85e-07		No Hit
axo24870-f_at	9.42	8.35	2.09	6.51e-06	8.63e-05		No Hit
axo28839-f_at	7.81	6.75	2.09	1.75e-06	2.74e-05		No Hit
axo11443-r_at	6.42	5.36	2.09	0.0023	0.0129	IGSF6	immunoglobulin superfamily, member 6 [Homo sapiens]
axo23758-f_at	8.41	7.35	2.08	0.0439	0.1388		LOC100145764 protein [Xenopus tropicalis]
axo30827-f_at	6.73	5.68	2.08	8.8e-07	1.5e-05		No Hit
axo14439-f_at	12.11	11.05	2.08	7.39e-13	7.78e-11	SDC1	syndecan 1 precursor [Homo sapiens]
axo03113-f_at	8.98	7.92	2.08	1.74e-09	6.64e-08	FAM89A	family with sequence similarity 89, member A [Homo sapiens]
axo12003-f_at	9.23	8.18	2.08	1.94e-06	2.98e-05	SEC23A	SEC23-related protein A [Homo sapiens]
axo19888-f_at	6.61	5.55	2.08	3.02e-07	5.93e-06	MXRA8	matrix-remodelling associated 8 [Homo sapiens]
axo20132-r_s_at	7.1	6.05	2.08	2.86e-07	5.66e-06	C9orf3	aminopeptidase O [Homo sapiens]
axo19365-f_at	7.04	5.99	2.08	1.39e-06	2.26e-05	EEPD1	endonucleaseexonucleasephosphatase family domain containing 1 [Homo sapiens]
axo08129-f_at	6.12	5.06	2.08	7.63e-06	9.84e-05	MARCKS	myristoylated alanine-rich protein kinase C substrate [Homo sapiens]
axo23508-f_at	8.59	7.53	2.08	0.0033	0.0176		PREDICTED: hypothetical protein, partial [Ciona intestinalis]
axo20060-f_at	6.38	5.33	2.07	2.99e-06	4.38e-05	TTYH2	tweety 2 isoform 1 [Homo sapiens]
axo15376-r_at	10.22	9.17	2.07	1.39e-09	5.51e-08	GPX8	glutathione peroxidase 8 [Homo sapiens]
axo13375-f_at	7.76	6.71	2.06	9.83e-06	0.0001	PCOLCE2	procollagen C-endopeptidase enhancer 2 [Homo sapiens]
axo16877-f_at	9.34	8.29	2.06	3.85e-08	1.01e-06	PDLIM5	PDZ and LIM domain 5 isoform b [Homo sapiens]
axo13106-f_at	7.91	6.87	2.06	2.82e-06	4.17e-05	EPB41L3	erythrocyte membrane protein band 4.1-like 3 [Homo sapiens]
axo29206-f_at	6.62	5.58	2.05	0.0005	0.0036		No Hit
axo19272-f_at	5.07	4.03	2.05	0.0009	0.0057	NINL	ninein-like [Homo sapiens]
axo25783-f_at	6.1	5.06	2.05	2.31e-05	0.0003		No Hit
axo27454-f_at	9.8	8.77	2.05	4.37e-09	1.47e-07		No Hit
axo02989-r_at	7.65	6.62	2.05	7.09e-05	0.0007	BCO2	beta-carotene dioxygenase 2 isoform b [Homo sapiens]
axo29100-f_at	7.72	6.69	2.04	3.35e-05	0.0004		No Hit
axo25096-f_at	9.21	8.18	2.04	2.85e-07	5.66e-06		No Hit
axo18325-f_at	8.93	7.91	2.04	1.12e-08	3.43e-07	RBKS	ribokinase [Homo sapiens]
axo17600-f_at	7.03	6.01	2.03	0.0419	0.1339	TWSG1	twisted gastrulation [Homo sapiens]
axo06449-f_at	8.22	7.2	2.03	0.0102	0.0443	LUZP1	leucine zipper protein 1 [Homo sapiens]
axo08999-f_at	10.02	9.01	2.02	2.37e-09	8.73e-08	GPR137B	G protein-coupled receptor 137B [Homo sapiens]
axo04102-f_at	9.16	8.15	2.02	2.58e-05	0.0003		PREDICTED: hypothetical protein [Homo sapiens]
axo26988-f_at	10.3	9.29	2.02	1.87e-07	3.96e-06		No Hit
axo23514-f_at	8.76	7.75	2.02	0.0058	0.0278		PREDICTED: similar to programmed cell death ligand 1 [Taeniopygia guttata]
axo29216-f_at	9.46	8.45	2.02	2.27e-05	0.0003		No Hit
axo20065-r_at	8.7	7.69	2.01	0.0011	0.0072	CNDP1	carnosinase 1 [Homo sapiens]
axo11543-f_at	7.11	6.1	2.01	4.73e-08	1.21e-06	CSTB	cystatin B [Homo sapiens]
axo19025-r_at	9.65	8.64	2.01	3.31e-08	8.84e-07	NAT11	N-acetyltransferase 11 [Homo sapiens]
axo05429-r_at	6.76	5.76	2	2.35e-07	4.82e-06	ADFP	adipose differentiation-related protein [Homo sapiens]
axo12351-f_at	10.3	9.3	2	4.71e-08	1.2e-06	ABLIM1	actin-binding LIM protein 1 isoform s [Homo sapiens]
axo27826-f_at	10.73	9.73	2	9.71e-10	4.04e-08		No Hit
axo09380-r_at	9.79	10.79	-2	4.99e-11	3.01e-09	YARS	tyrosyl-tRNA synthetase [Homo sapiens]
axo24180-f_at	7.9	8.91	-2	6.48e-06	8.61e-05		PREDICTED: similar to TCF7L2 [Gallus gallus]
axo13132-r_at	6.87	7.87	-2	0.0002	0.0017	DNAJB9	DnaJ (Hsp40) homolog, subfamily B, member 9 [Homo sapiens]
axo12746-f_at	5.99	6.99	-2	0.0005	0.0037	TESK2	testis-specific protein kinase 2 [Homo sapiens]
axo02902-r_at	4.89	5.89	-2	0.0285	0.1002	RBPMS2	RNA binding protein with multiple splicing 2 [Homo sapiens]
axo29169-f_at	10.53	11.53	-2	1.51e-07	3.3e-06		No Hit
axo12280-f_at	10.66	11.67	-2.01	4.87e-05	0.0005	MTHFD2	methylenetetrahydrofolate dehydrogenase 2 precursor [Homo sapiens]
axo23430-f_at	9.39	10.39	-2.01	0.0011	0.0072		conserved hypothetical protein [Culex quinquefasciatus]
axo05333-r_at	11.17	12.18	-2.01	0.0002	0.0016	RP11-544M22.4	putative thiosulfate sulfurtransferase KAT isoform 1 [Homo sapiens]
axo06608-r_at	9.6	10.61	-2.01	3.49e-06	5.02e-05	FBP1	fructose-1,6-bisphosphatase 1 [Homo sapiens]
axo27684-f_at	9.48	10.48	-2.01	6.47e-05	0.0006		No Hit
axo07392-r_at	5.38	6.39	-2.01	4.65e-07	8.67e-06	ACADS	short-chain acyl-CoA dehydrogenase precursor [Homo sapiens]
axo24423-f_at	5.23	6.24	-2.01	4.59e-06	6.4e-05		unnamed protein product [Homo sapiens]
axo02376-f_at	6.14	7.15	-2.01	3.24e-08	8.7e-07	CCDC125	coiled-coil domain containing 125 [Homo sapiens]
axo08716-f_at	8.75	9.75	-2.01	2.25e-11	1.53e-09	SORT1	sortilin 1 preproprotein [Homo sapiens]
axo12526-r_at	3.32	4.33	-2.01	7.99e-08	1.92e-06	GMPR	guanosine monophosphate reductase [Homo sapiens]
axo15883-f_at	5.92	6.93	-2.01	1.72e-08	4.95e-07	NRN1	neuritin precursor [Homo sapiens]
axo20335-f_at	6.99	8	-2.02	6.53e-07	1.16e-05	SEC11C	SEC11-like 3 [Homo sapiens]
axo15605-f_at	6.61	7.62	-2.02	0.0049	0.024	EML1	echinoderm microtubule associated protein like 1 isoform a [Homo sapiens]
axo24639-f_at	5.2	6.21	-2.02	3.71e-05	0.0004		No Hit
axo17228-f_at	4.59	5.6	-2.02	0.004	0.0202	SGTB	small glutamine-rich tetratricopeptide repeat (TPR)-containing, beta [Homo sapiens]
axo01910-f_at	8.73	9.75	-2.02	3.99e-07	7.57e-06	SIAE	cytosolic sialic acid 9-O-acetylesterase homolog [Homo sapiens]
axo31499-f_s_at	10.02	11.04	-2.02	1.68e-07	3.62e-06		No Hit
axo13634-r_at	9.92	10.93	-2.02	5.29e-07	9.71e-06	GCAT	glycine C-acetyltransferase precursor [Homo sapiens]
axo11228-f_at	10.03	11.05	-2.02	0.0008	0.0053	PYGM	glycogen phosphorylase [Homo sapiens]
axo10181-r_at	11.05	12.07	-2.02	1.56e-09	6.08e-08	NARS	asparaginyl-tRNA synthetase [Homo sapiens]
axo24612-f_at	5.21	6.22	-2.02	0.0013	0.008		No Hit
axo24161-r_at	5.98	7	-2.03	0.0007	0.0048		PREDICTED: hypothetical protein [Taeniopygia guttata]
axo11847-f_at	6.93	7.95	-2.03	0.0013	0.0083	POLE	DNA polymerase epsilon catalytic subunit [Homo sapiens]
axo30262-f_at	11.74	12.76	-2.03	1.59e-09	6.16e-08		No Hit
axo02183-f_at	8.39	9.41	-2.03	3.67e-11	2.28e-09	PDZD8	PDZ domain containing 8 [Homo sapiens]
axo09783-f_at	7.03	8.06	-2.03	1.32e-06	2.15e-05	FGF12	fibroblast growth factor 12 isoform 2 [Homo sapiens]
axo25564-f_at	5.02	6.04	-2.03	0.0033	0.0174		No Hit
axo30329-f_at	8.81	9.84	-2.04	1.5e-10	7.95e-09		No Hit
axo05173-f_at	9.14	10.17	-2.04	0.0003	0.0026	SCNN1B	sodium channel, nonvoltage-gated 1, beta [Homo sapiens]
axo08233-f_at	5.26	6.29	-2.04	0.0023	0.0127	MYH3	myosin, heavy chain 3, skeletal muscle, embryonic [Homo sapiens]
axo08244-f_at	4.29	5.32	-2.04	0.0127	0.0529	MYH6	myosin heavy chain 6 [Homo sapiens]
axo11153-f_at	7.87	8.9	-2.04	0.0005	0.0036	HES1	hairy and enhancer of split 1 [Homo sapiens]
axo18737-f_at	6.42	7.46	-2.04	1.1e-07	2.52e-06	GDPD3	glycerophosphodiester phosphodiesterase domain containing 3 [Homo sapiens]
axo25250-f_at	9.21	10.24	-2.04	7.5e-08	1.81e-06		No Hit
axo10858-f_at	10.19	11.22	-2.05	2.16e-09	8.08e-08	ATP2A3	ATPase, Ca++ transporting, ubiquitous isoform a [Homo sapiens]
axo07917-r_at	9.71	10.74	-2.05	1.07e-10	6e-09	HARS	histidyl-tRNA synthetase [Homo sapiens]
axo18055-f_at	10.09	11.13	-2.05	1.83e-07	3.9e-06	GRHL3	sister-of-mammalian grainyhead protein isoform 1 [Homo sapiens]
axo10648-r_at	7.2	8.23	-2.05	3.9e-05	0.0004	MARS	methionyl-tRNA synthetase [Homo sapiens]
axo24605-f_at	8.55	9.58	-2.05	0.0002	0.002		No Hit
axo07453-f_at	7.39	8.42	-2.05	0.0003	0.0022	AOAH	acyloxyacyl hydrolase precursor [Homo sapiens]
axo31306-f_s_at	11.16	12.2	-2.05	0.0005	0.0037		No Hit
axo16888-f_at	12.27	13.31	-2.05	0.0005	0.0033	MUC4	mucin 4 isoform a [Homo sapiens]
axo02269-f_at	4.55	5.6	-2.06	4.5e-10	2.01e-08	IDH3G	isocitrate dehydrogenase 3 (NAD+) gamma isoform b precursor [Homo sapiens]
axo29738-f_at	8.25	9.3	-2.06	7.44e-08	1.8e-06		No Hit
axo28245-f_at	7.81	8.86	-2.06	5.8e-05	0.0006		No Hit
axo25634-f_at	9.54	10.59	-2.07	4.61e-07	8.61e-06		No Hit
axo19871-r_at	6.95	8	-2.07	1.34e-06	2.18e-05	TMEM79	transmembrane protein 79 [Homo sapiens]
axo24555-f_at	7.66	8.7	-2.07	9.07e-12	6.92e-10		No Hit
axo17249-f_at	9.38	10.44	-2.07	3.31e-08	8.84e-07	GTPBP2	GTP binding protein 2 [Homo sapiens]
axo00638-r_at	7.21	8.26	-2.07	3.78e-06	5.38e-05	SAT2	diamine N-acetyltransferase 2 [Homo sapiens]
axo07707-r_at	5.43	6.48	-2.07	0.0452	0.1421	CTSG	cathepsin G preproprotein [Homo sapiens]
axo13782-r_at	9.55	10.6	-2.07	5.25e-09	1.72e-07	PDCD4	programmed cell death 4 isoform 1 [Homo sapiens]
axo16851-r_at	6.69	7.74	-2.08	0.0013	0.0081	AFMID	arylformamidase isoform 1 [Homo sapiens]
axo15715-r_at	11.31	12.36	-2.08	4.1e-06	5.8e-05	RHCG	Rh family, C glycoprotein [Homo sapiens]
axo11817-f_s_at	3.61	4.66	-2.08	7.86e-05	0.0007	PCP4	Purkinje cell protein 4 [Homo sapiens]
axo25382-f_at	6.51	7.56	-2.08	0.0014	0.0085		No Hit
axo24795-f_at	10.06	11.11	-2.08	5.1e-08	1.29e-06		No Hit
axo25258-f_at	7.37	8.43	-2.08	1.29e-08	3.88e-07		No Hit
axo12214-r_at	3.96	5.02	-2.08	4.04e-06	5.72e-05	CSPG5	chondroitin sulfate proteoglycan 5 (neuroglycan C) precursor [Homo sapiens]
axo26953-f_at	8.23	9.29	-2.09	6.17e-09	1.99e-07		No Hit
axo13266-f_at	9.29	10.35	-2.09	6.21e-10	2.69e-08	STK39	serine threonine kinase 39 (STE20SPS1 homolog, yeast) [Homo sapiens]
axo18314-f_at	9.63	10.7	-2.09	3.13e-08	8.42e-07	CARS	cysteinyl-tRNA synthetase isoform c [Homo sapiens]
axo07092-r_at	4.57	5.64	-2.1	0.0007	0.0047	CNN1	calponin 1, basic, smooth muscle [Homo sapiens]
AFFX-ThrX-3_at	9.06	10.12	-2.1	4.76e-08	1.21e-06
axo12406-f_at	9.83	10.9	-2.1	0.042	0.1341	INMT	indolethylamine N-methyltransferase [Homo sapiens]
axo31686-f_at	12.13	13.2	-2.1	9.74e-05	0.0009		No Hit
axo26199-f_at	8.7	9.77	-2.1	3.81e-07	7.27e-06		No Hit
axo13576-f_at	5.15	6.22	-2.1	1.81e-06	2.82e-05	GNPAT	glyceronephosphate O-acyltransferase [Homo sapiens]
axo17060-f_at	7.07	8.14	-2.1	4.42e-08	1.14e-06	BAIAP2L1	BAI1-associated protein 2-like 1 [Homo sapiens]
axo02374-r_at	10.68	11.75	-2.1	1.29e-05	0.0002	AGR3	breast cancer membrane protein 11 [Homo sapiens]
axo01345-f_at	7.04	8.12	-2.11	0.0002	0.0013	ACOT11	thioesterase, adipose associated isoform BFIT2 [Homo sapiens]
axo01486-f_at	8.96	10.03	-2.11	1.71e-08	4.94e-07	PQLC3	PQ loop repeat containing 3 [Homo sapiens]
axo02331-f_at	5.52	6.59	-2.11	0.0001	0.0011	TJP1	tight junction protein 1 isoform b [Homo sapiens]
axo09379-r_at	5.5	6.57	-2.11	3.52e-06	5.06e-05	YARS	tyrosyl-tRNA synthetase [Homo sapiens]
axo15787-f_at	8.91	9.99	-2.11	1.01e-08	3.12e-07	GLTP	glycolipid transfer protein [Homo sapiens]
axo27306-f_at	11.52	12.6	-2.11	1.37e-11	9.82e-10		No Hit
axo05256-f_at	7.6	8.68	-2.11	1.88e-06	2.92e-05	DGKZ	diacylglycerol kinase zeta isoform 4 [Homo sapiens]
axo18220-r_at	8.56	9.64	-2.11	1.65e-05	0.0002	GNGT1	guanine nucleotide binding protein (G protein), gamma transducing activity polypeptide 1 [Homo sapiens]
axo09382-f_at	5.32	6.4	-2.12	3.3e-12	2.83e-10	PDXK	pyridoxal kinase [Homo sapiens]
axo25919-f_at	8.32	9.41	-2.12	1.5e-07	3.27e-06		No Hit
axo27179-f_at	8.64	9.72	-2.12	2.78e-05	0.0003		No Hit
axo00482-r_at	5.46	6.55	-2.12	0.0004	0.0033	CPNE4	copine IV [Homo sapiens]
axo15889-f_at	4.82	5.9	-2.12	0.0049	0.024	CYP39A1	cytochrome P450, family 39, subfamily A, polypeptide 1 [Homo sapiens]
axo17028-f_at	7.25	8.33	-2.12	3.02e-06	4.41e-05	CMAS	cytidine 5'-monophosphate N-acetylneuraminic acid synthetase [Homo sapiens]
axo13847-f_at	6.66	7.75	-2.13	6.63e-07	1.18e-05	TFCP2L1	LBP-9 [Homo sapiens]
axo01377-r_at	6.46	7.55	-2.13	7.12e-08	1.73e-06	CYB5A	cytochrome b-5 isoform 1 [Homo sapiens]
axo12983-r_at	5.73	6.82	-2.13	0.0067	0.0313	EHF	ets homologous factor [Homo sapiens]
axo28931-f_at	4.49	5.58	-2.13	6.95e-07	1.23e-05		No Hit
axo12856-f_at	5.4	6.49	-2.13	0.0082	0.0369	BRCA1	breast cancer 1, early onset isoform BRCA1-delta9-10-11b [Homo sapiens]
axo03777-f_at	7.26	8.35	-2.14	0.0002	0.0019	hCG_1773238	PREDICTED: similar to hCG1773238 [Homo sapiens]
axo12290-f_at	9.55	10.65	-2.14	1.39e-08	4.13e-07	STARD10	START domain containing 10 [Homo sapiens]
axo28561-f_at	5.86	6.96	-2.14	3.46e-09	1.2e-07		No Hit
axo10624-r_at	4.93	6.03	-2.14	2.39e-10	1.17e-08	IGFALS	insulin-like growth factor binding protein, acid labile subunit isoform 2 precursor [Homo sapiens]
axo01125-f_at	4.92	6.02	-2.15	2.2e-06	3.33e-05	PEBP4	phosphatidylethanolamine-binding protein 4 [Homo sapiens]
axo24714-f_at	10.66	11.76	-2.15	1.56e-12	1.54e-10		No Hit
axo15890-f_at	11.67	12.77	-2.15	9.13e-12	6.92e-10	FKBP11	FK506 binding protein 11 isoform 1 precursor [Homo sapiens]
axo25608-f_at	7.45	8.56	-2.15	3.98e-07	7.57e-06		No Hit
axo13537-f_at	5.78	6.89	-2.15	3.58e-08	9.52e-07	STXBP6	amisyn [Homo sapiens]
axo12378-f_at	6.15	7.25	-2.15	0.0266	0.0949	SC4MOL	sterol-C4-methyl oxidase-like isoform 1 [Homo sapiens]
axo15048-r_at	5.66	6.77	-2.16	0.0028	0.0151	SOSTDC1	sclerostin domain containing 1 precursor [Homo sapiens]
axo19039-f_at	6.9	8.01	-2.16	0.0012	0.0074	C18orf22	hypothetical protein LOC79863 [Homo sapiens]
axo14750-f_at	7.25	8.36	-2.16	0.0015	0.0092	KIAA0802	hypothetical protein LOC23255 [Homo sapiens]
axo30106-f_at	7.37	8.49	-2.16	0.0151	0.0604		No Hit
axo15308-f_at	10.71	11.82	-2.16	1.63e-10	8.5e-09	UMOD	uromodulin precursor [Homo sapiens]
axo15318-f_at	6.76	7.87	-2.17	2.28e-06	3.43e-05	UMOD	uromodulin precursor [Homo sapiens]
axo11067-f_at	11.08	12.2	-2.17	0.0078	0.0356	TECTA	tectorin alpha precursor [Homo sapiens]
axo02500-f_at	7.19	8.31	-2.17	2.65e-05	0.0003	FAM83C	hypothetical protein LOC128876 [Homo sapiens]
axo07893-f_at	8.86	9.98	-2.17	8.27e-12	6.36e-10	GOT1	aspartate aminotransferase 1 [Homo sapiens]
axo12245-f_at	6.44	7.56	-2.17	8.24e-06	0.0001	HSPA8	heat shock 70kDa protein 8 isoform 1 [Homo sapiens]
axo20318-f_at	5.06	6.18	-2.18	9.89e-05	0.0009	KRTAP4-3	keratin associated protein 4-3 [Homo sapiens]
axo18827-r_at	6.87	8	-2.18	0.0001	0.001	NHLRC3	NHL repeat containing 3 isoform b [Homo sapiens]
axo29786-f_at	6.38	7.51	-2.18	1.46e-07	3.21e-06		No Hit
axo30078-f_at	8.95	10.08	-2.18	3.05e-11	1.96e-09		No Hit
axo02170-r_at	5.22	6.35	-2.19	1.21e-07	2.73e-06	PPIL6	peptidylprolyl isomerase-like 6 isoform 1 [Homo sapiens]
axo23634-f_at	12.14	13.27	-2.19	0.0006	0.0042		PREDICTED: hypothetical protein [Danio rerio]
axo28620-f_at	7.2	8.34	-2.19	1.71e-05	0.0002		No Hit
axo18334-f_at	7.38	8.52	-2.19	5.37e-06	7.33e-05	EPB41L4A	erythrocyte protein band 4.1-like 4 [Homo sapiens]
axo16944-r_at	8.53	9.66	-2.2	4.66e-14	7.09e-12	TEX2	testis expressed sequence 2 [Homo sapiens]
axo12244-f_at	8.52	9.66	-2.2	0.0011	0.0068	HSPA8	heat shock 70kDa protein 8 isoform 1 [Homo sapiens]
axo23084-f_at	7.04	8.18	-2.2	1.82e-11	1.26e-09		PREDICTED: similar to ORF2-encoded protein [Strongylocentrotus purpuratus]
axo10934-f_at	5.31	6.45	-2.2	8.57e-06	0.0001	GAK	cyclin G associated kinase [Homo sapiens]
axo23752-r_at	4.22	5.36	-2.2	3.09e-05	0.0003		GDNF family receptor alpha 2 [Gallus gallus]
axo07919-r_at	10.65	11.79	-2.21	6.69e-06	8.83e-05	ALDH1A1	aldehyde dehydrogenase 1A1 [Homo sapiens]
axo19652-f_at	8.04	9.18	-2.21	3.37e-09	1.17e-07	SYT16	synaptotagmin XIV-like [Homo sapiens]
axo09326-r_at	8.79	9.93	-2.21	1.47e-09	5.78e-08	SLC43A1	solute carrier family 43, member 1 [Homo sapiens]
axo25840-f_at	10.93	12.08	-2.21	0.0001	0.0013		No Hit
axo11057-r_at	9.17	10.32	-2.21	2.72e-07	5.46e-06	SHMT2	serine hydroxymethyltransferase 2 (mitochondrial) [Homo sapiens]
axo27891-f_at	5.57	6.72	-2.21	0.0007	0.0045		No Hit
axo08320-r_at	4.97	6.12	-2.21	1.07e-05	0.0001	OSBP	oxysterol binding protein [Homo sapiens]
axo23528-f_at	9.2	10.35	-2.22	0.002	0.0114		ranaspumin-6 [Engystomops pustulosus]
axo00766-r_at	7.62	8.78	-2.22	0.0011	0.0073	ARL11	ADP-ribosylation factor-like 11 [Homo sapiens]
axo22287-f_at	6.59	7.74	-2.22	0.0369	0.1218		PREDICTED: hypothetical protein [Ornithorhynchus anatinus]
axo07124-r_at	8.59	9.74	-2.22	0.0356	0.1184	CTSL2	cathepsin L2 preproprotein [Homo sapiens]
axo03123-f_at	8.8	9.95	-2.22	2.03e-07	4.25e-06	GJB7	gap junction protein, beta 7, 25kDa [Homo sapiens]
axo17774-r_at	5.85	7.01	-2.24	2.12e-08	6.01e-07	TMEM181	G protein-coupled receptor 178 [Homo sapiens]
axo08330-f_at	8.29	9.45	-2.24	6.36e-07	1.13e-05	PEBP1	prostatic binding protein [Homo sapiens]
axo17603-f_at	5.68	6.85	-2.25	1.96e-07	4.14e-06	CBX8	chromobox homolog 8 [Homo sapiens]
axo15328-r_at	8.04	9.21	-2.25	1.95e-06	2.99e-05	GMNN	geminin [Homo sapiens]
axo25752-f_at	5.98	7.15	-2.25	2.66e-06	3.96e-05		No Hit
axo08136-f_at	7.97	9.14	-2.26	0.0066	0.0312	MAL	T-lymphocyte maturation-associated protein isoform a [Homo sapiens]
axo06571-r_at	3.89	5.07	-2.26	5.69e-05	0.0006	RPH3A	rabphilin 3A homolog isoform 1 [Homo sapiens]
axo17184-f_at	8.1	9.27	-2.26	1.56e-05	0.0002	RHOF	ras homolog gene family, member F [Homo sapiens]
axo07206-r_at	8.73	9.9	-2.26	0.0003	0.0021	IL1B	interleukin 1, beta proprotein [Homo sapiens]
axo09176-f_at	7.91	9.09	-2.26	7.22e-06	9.38e-05	CHIT1	chitotriosidase [Homo sapiens]
axo00847-r_at	6.08	7.26	-2.26	4.67e-07	8.7e-06	CANT1	calcium activated nucleotidase 1 [Homo sapiens]
axo20276-r_at	7.22	8.4	-2.27	1.09e-08	3.33e-07	WASF1	Wiskott-Aldrich syndrome protein family member 1 [Homo sapiens]
axo03621-f_at	8.46	9.64	-2.27	1.06e-07	2.44e-06	WARS	tryptophanyl-tRNA synthetase isoform b [Homo sapiens]
axo09607-f_at	7.28	8.46	-2.27	1.01e-08	3.11e-07	NR3C2	nuclear receptor subfamily 3, group C, member 2 [Homo sapiens]
axo17023-f_at	7.27	8.46	-2.28	0.0033	0.0173	ANLN	anillin, actin binding protein [Homo sapiens]
axo00635-r_at	5.42	6.61	-2.28	1.06e-05	0.0001	RAD50	RAD50 homolog isoform 2 [Homo sapiens]
axo18008-f_at	10.19	11.38	-2.28	0.0012	0.0076	PLSCR1	phospholipid scramblase 1 [Homo sapiens]
axo02994-f_at	8.12	9.31	-2.28	1.97e-09	7.43e-08		leader-binding protein 32 isoform 2 [Homo sapiens]
axo24817-f_at	8.46	9.65	-2.28	4.12e-09	1.39e-07		No Hit
axo21623-f_at	6.39	7.58	-2.29	0.0161	0.0637		hypothetical protein M23134_04844 [Microscilla marina ATCC 23134]
axo10086-f_at	4.43	5.63	-2.29	6.08e-06	8.16e-05	EPS8	epidermal growth factor receptor pathway substrate 8 [Homo sapiens]
axo03110-f_at	4.94	6.14	-2.29	7.83e-06	0.0001	FAM73A	hypothetical protein LOC374986 [Homo sapiens]
axo04289-r_at	5.15	6.34	-2.29	1.92e-07	4.05e-06	PREPL	prolyl endopeptidase-like isoform D [Homo sapiens]
axo06308-r_at	6.4	7.6	-2.29	0.0022	0.0123	LOC440498	heat shock factor binding protein 1-like [Homo sapiens]
axo02591-f_at	8.27	9.47	-2.29	1.84e-11	1.26e-09		aldehyde dehydrogenase 1 family, member L2 [Homo sapiens]
axo01423-r_at	8.46	9.66	-2.29	6.92e-07	1.22e-05	TARS	threonyl-tRNA synthetase [Homo sapiens]
axo08588-f_at	7.24	8.44	-2.29	0.0005	0.0035	PTPRJ	protein tyrosine phosphatase, receptor type, J isoform 1 precursor [Homo sapiens]
axo20264-r_at	8.72	9.92	-2.3	2.02e-08	5.73e-07	HIAT1	hippocampus abundant transcript 1 [Homo sapiens]
axo13845-f_at	4.66	5.87	-2.3	2.16e-08	6.11e-07	GRHL1	leader-binding protein 32 isoform 1 [Homo sapiens]
axo27085-f_at	10.06	11.27	-2.31	2.29e-10	1.14e-08		No Hit
axo11876-f_at	7.56	8.77	-2.31	2.6e-09	9.41e-08	DNAJC3	DnaJ (Hsp40) homolog, subfamily C, member 3 [Homo sapiens]
axo05935-f_at	9.53	10.74	-2.31	1.04e-07	2.39e-06	SATB1	special AT-rich sequence binding protein 1 [Homo sapiens]
axo15555-f_at	5.01	6.22	-2.31	6.75e-08	1.66e-06	PGCP	plasma glutamate carboxypeptidase [Homo sapiens]
axo04906-r_at	10.19	11.4	-2.31	0.0002	0.0017	PON2	paraoxonase 2 isoform 1 [Homo sapiens]
axo03873-r_at	5.58	6.79	-2.32	0.0037	0.0191	LOC100131696	PREDICTED: similar to hCG2043352 [Homo sapiens]
axo00987-f_at	5.56	6.78	-2.32	0.0027	0.0148	NEXN	nexilin (F actin binding protein) [Homo sapiens]
axo06035-f_at	6.84	8.06	-2.32	2.61e-05	0.0003	PBX3	pre-B-cell leukemia homeobox 3 isoform 2 [Homo sapiens]
axo16866-f_at	4.79	6	-2.32	4.16e-06	5.87e-05	SLC39A9	solute carrier family 39 (zinc transporter), member 9 [Homo sapiens]
axo04187-r_at	9.76	10.98	-2.33	9.1e-12	6.92e-10	FAM3C	family with sequence similarity 3, member C precursor [Homo sapiens]
axo01466-f_at	6.1	7.32	-2.33	5.99e-06	8.04e-05	KLHDC7A	kelch domain containing 7A [Homo sapiens]
axo17620-f_at	9.54	10.76	-2.33	3.76e-05	0.0004	NMRAL1	NmrA-like family domain containing 1 [Homo sapiens]
axo06594-f_at	4.5	5.72	-2.34	0.0063	0.03	F10	coagulation factor X preproprotein [Homo sapiens]
axo03702-f_at	3.41	4.64	-2.34	1.59e-05	0.0002		PREDICTED: hypothetical protein [Homo sapiens]
axo11065-f_at	13.28	14.5	-2.34	0.03	0.1041	TECTA	tectorin alpha precursor [Homo sapiens]
axo29833-f_at	7.88	9.11	-2.34	1.15e-07	2.61e-06		No Hit
axo11718-f_at	10.17	11.41	-2.36	1.05e-05	0.0001	WFDC2	WAP four-disulfide core domain 2 precursor [Homo sapiens]
axo27045-f_at	10.19	11.43	-2.36	1.7e-07	3.66e-06		No Hit
axo09045-f_at	6.2	7.44	-2.36	0.0492	0.1513	PHLDA2	pleckstrin homology-like domain family A member 2 [Homo sapiens]
axo11082-f_at	9.98	11.22	-2.36	0.0002	0.0018	MALL	mal, T-cell differentiation protein-like [Homo sapiens]
axo08776-f_at	6.41	7.65	-2.36	9.43e-08	2.2e-06	ST8SIA1	alpha-2,8-sialyltransferase 1 [Homo sapiens]
axo31423-f_s_at	6.03	7.27	-2.36	4.2e-07	7.92e-06		No Hit
axo29301-f_at	6.82	8.07	-2.37	7.1e-07	1.25e-05		No Hit
axo10223-f_at	8.16	9.41	-2.37	7.14e-07	1.25e-05	PCK2	mitochondrial phosphoenolpyruvate carboxykinase 2 isoform 1 precursor [Homo sapiens]
axo27335-f_at	10.57	11.81	-2.37	2.43e-14	3.81e-12		No Hit
axo15260-f_at	8.08	9.32	-2.37	9.83e-05	0.0009	FAH	fumarylacetoacetate hydrolase (fumarylacetoacetase) [Homo sapiens]
axo01342-f_at	9.27	10.51	-2.37	2.06e-09	7.73e-08	SGMS1	sphingomyelin synthase 1 [Homo sapiens]
axo07355-f_s_at	10.41	11.65	-2.37	0.0183	0.0706	MR1	major histocompatibility complex, class I-related [Homo sapiens]
axo05497-f_at	7.58	8.83	-2.38	5.08e-09	1.67e-07	LNX1	ligand of numb-protein X 1 isoform a [Homo sapiens]
axo10659-f_at	7.19	8.44	-2.38	1.62e-08	4.72e-07	MYO1E	myosin IE [Homo sapiens]
axo10238-r_at	5.04	6.3	-2.38	1.08e-06	1.8e-05	PSPH	phosphoserine phosphatase [Homo sapiens]
axo10988-r_at	10.61	11.86	-2.38	2.98e-09	1.06e-07	HDLBP	high density lipoprotein binding protein [Homo sapiens]
axo02260-r_at	7.89	9.14	-2.38	4.51e-06	6.31e-05	SLC41A1	solute carrier family 41 member 1 [Homo sapiens]
axo28336-f_at	4.08	5.33	-2.39	7.81e-07	1.36e-05		No Hit
axo29838-f_at	9.96	11.21	-2.39	4.92e-05	0.0005		No Hit
axo09472-r_at	6.8	8.06	-2.39	2.34e-08	6.51e-07	SLC4A4	solute carrier family 4, sodium bicarbonate cotransporter, member 4 isoform 2 [Homo sapiens]
axo16984-f_at	6.91	8.17	-2.39	2.82e-08	7.71e-07	DNAJA4	DnaJ (Hsp40) homolog, subfamily A, member 4 isoform 1 [Homo sapiens]
axo30540-f_at	4.19	5.45	-2.39	0.0371	0.1221		No Hit
axo15758-r_at	9.16	10.42	-2.39	0.0006	0.004	ISYNA1	inositol-3-phosphate synthase 1 [Homo sapiens]
axo27969-f_at	7.91	9.17	-2.4	4.84e-07	8.95e-06		No Hit
axo08764-f_at	5.18	6.44	-2.4	2.57e-08	7.06e-07	DHFR	dihydrofolate reductase [Homo sapiens]
axo04875-r_at	4.88	6.14	-2.4	3.38e-05	0.0004	TMEM213	transmembrane protein 213 [Homo sapiens]
axo27567-f_at	7.04	8.31	-2.41	4.77e-11	2.9e-09		No Hit
axo08723-f_at	6.88	8.15	-2.41	0.0382	0.1249	CYP51A1	cytochrome P450, family 51, subfamily A, polypeptide 1 isoform 1 [Homo sapiens]
axo30858-f_at	6.42	7.69	-2.41	2.93e-07	5.8e-06		No Hit
axo09381-f_at	7.73	9	-2.41	7.29e-10	3.14e-08	YARS	tyrosyl-tRNA synthetase [Homo sapiens]
axo22605-f_at	4.88	6.15	-2.41	3.36e-09	1.17e-07		thyroid hormone down-regulated protein (gene 18) [Xenopus laevis]
axo17962-r_at	8.07	9.34	-2.41	8.96e-10	3.77e-08	SNTB1	basic beta 1 syntrophin [Homo sapiens]
axo21673-f_at	5.79	7.06	-2.42	0.0116	0.049		AF172992_1 urokinase plasminogen activator surface receptor precursor [Cricetulus griseus]
axo01585-f_at	7.44	8.71	-2.42	1.45e-10	7.72e-09	MFSD6L	major facilitator superfamily domain containing 6-like [Homo sapiens]
axo06018-r_at	6.32	7.59	-2.42	7.89e-09	2.49e-07	SARDH	sarcosine dehydrogenase precursor [Homo sapiens]
axo06028-r_at	8.25	9.52	-2.42	0.0093	0.0411	KRT5	keratin 5 [Homo sapiens]
axo24281-f_at	6	7.27	-2.42	1.46e-07	3.21e-06		Flavin reductase [Oncorhynchus mykiss]
axo04142-f_at	10.97	12.25	-2.43	3.65e-06	5.22e-05		PREDICTED: similar to hCG1811042 [Homo sapiens]
axo22754-f_s_at	12.01	13.29	-2.43	1.61e-11	1.13e-09		Unknown (protein for MGC:196824) [Xenopus laevis]
axo05214-f_at	9.77	11.05	-2.43	6.03e-09	1.95e-07	ELOVL7	elongation of very long chain fatty acids-like 7 [Homo sapiens]
axo05927-r_at	7.33	8.62	-2.43	1.69e-06	2.66e-05	HYOU1	hypoxia up-regulated 1 precursor [Homo sapiens]
axo21228-f_at	7.34	8.62	-2.43	0.0172	0.0673	NFKBIA	nuclear factor of kappa light polypeptide gene enhancer in B-cells inhibitor, alpha [Homo sapiens]
axo19026-r_at	6.64	7.92	-2.43	4.98e-08	1.26e-06	PRR5	proline rich 5 (renal) isoform 3 [Homo sapiens]
axo00233-f_at	5.52	6.8	-2.44	5.81e-09	1.89e-07	MYLK	myosin light chain kinase isoform 8 [Homo sapiens]
axo01875-f_at	6.09	7.37	-2.44	0.0012	0.0073	SULT6B1	sulfotransferase family, cytosolic, 6B, member 1 [Homo sapiens]
axo06952-f_at	9.19	10.47	-2.44	0.0028	0.0152	PLA2G4C	phospholipase A2, group IVC isoform 3 [Homo sapiens]
axo01373-f_at	10.21	11.5	-2.44	0.0326	0.1109	PSMB8	proteasome beta 8 subunit isoform E2 proprotein [Homo sapiens]
axo15312-f_at	6.57	7.86	-2.45	0.0014	0.0087	UMOD	uromodulin precursor [Homo sapiens]
axo09975-f_at	10.46	11.76	-2.45	2.17e-09	8.11e-08	CALR	calreticulin precursor [Homo sapiens]
axo07918-r_at	9.07	10.36	-2.45	4.8e-06	6.63e-05	ALDH1A1	aldehyde dehydrogenase 1A1 [Homo sapiens]
axo07952-f_at	10.09	11.39	-2.46	1.52e-09	5.95e-08	IARS	isoleucyl-tRNA synthetase [Homo sapiens]
axo15169-f_at	7.21	8.51	-2.46	1.84e-07	3.91e-06	WSB1	WD repeat and SOCS box-containing 1 isoform 1 [Homo sapiens]
axo03617-f_at	4.13	5.43	-2.46	0.0014	0.0086		5-hydroxytryptamine (serotonin) receptor 3A isoform a precursor [Homo sapiens]
axo12616-f_at	7.73	9.03	-2.46	2.1e-10	1.05e-08	SLC35D2	solute carrier family 35, member D2 [Homo sapiens]
axo06329-f_at	10.63	11.93	-2.47	0.0007	0.0047	LITAF	lipopolysaccharide-induced TNF-alpha factor isoform 1 [Homo sapiens]
axo01202-r_at	5.2	6.5	-2.47	2.85e-08	7.76e-07	C7orf38	hypothetical protein LOC221786 [Homo sapiens]
axo04146-f_at	8.39	9.7	-2.48	1.05e-10	5.89e-09	LOC440335	PREDICTED: hypothetical protein isoform 4 [Homo sapiens]
AFFX-r2-Bs-thr-M_s_at	7.58	8.9	-2.49	3.25e-10	1.53e-08
axo12311-f_at	5.78	7.1	-2.49	7.91e-06	0.0001	CYP46A1	cytochrome P450, family 46 [Homo sapiens]
axo24733-f_at	6.81	8.14	-2.5	1.83e-05	0.0002		No Hit
axo07323-f_at	7.4	8.72	-2.5	7.76e-13	8.07e-11	B4GALT1	UDP-Gal:betaGlcNAc beta 1,4- galactosyltransferase 1, membrane-bound form [Homo sapiens]
axo18661-f_at	7.21	8.54	-2.5	0.0037	0.0191	RASL11B	RAS-like family 11 member B [Homo sapiens]
axo29253-f_at	11.14	12.47	-2.5	1.24e-09	5e-08		No Hit
axo10713-f_at	3.62	4.95	-2.51	0.0022	0.0123	RELN	reelin isoform a [Homo sapiens]
axo12284-r_at	10.26	11.59	-2.51	4.76e-06	6.59e-05	FMO3	flavin containing monooxygenase 3 isoform 2 [Homo sapiens]
axo00390-f_at	7.63	8.96	-2.51	1.06e-06	1.77e-05	ACY3	aspartoacylase (aminocyclase) 3 [Homo sapiens]
axo17089-f_at	10.7	12.03	-2.51	0.0003	0.0026	NANS	N-acetylneuraminic acid phosphate synthase [Homo sapiens]
axo24673-f_at	5.69	7.02	-2.51	8.53e-07	1.47e-05		No Hit
axo01101-f_at	8.21	9.55	-2.52	1.44e-08	4.26e-07	IL20RB	interleukin 20 receptor beta precursor [Homo sapiens]
axo08392-f_at	4.22	5.56	-2.53	2.24e-05	0.0002	PI3	elafin preproprotein [Homo sapiens]
axo06213-f_at	9.55	10.89	-2.53	3.49e-10	1.61e-08	OXCT1	3-oxoacid CoA transferase 1 precursor [Homo sapiens]
axo08844-f_at	6.77	8.11	-2.53	1.32e-05	0.0002	UAP1	UDP-N-acteylglucosamine pyrophosphorylase 1 [Homo sapiens]
axo18920-f_at	5.99	7.33	-2.54	5.46e-07	9.97e-06	GALNT12	UDP-N-acetyl-alpha-D-galactosamine:polypeptide N-acetylgalactosaminyltransferase 12 (GalNAc-T12) [Homo sapiens]
axo08686-r_at	10.64	11.98	-2.54	5.2e-05	0.0005	RGS2	regulator of G-protein signaling 2, 24kDa [Homo sapiens]
axo28253-f_at	5.92	7.26	-2.54	3.23e-07	6.29e-06		No Hit
axo18695-r_at	7.8	9.15	-2.54	0.002	0.0117	TMEM38A	transmembrane protein 38A [Homo sapiens]
axo05554-f_at	6.87	8.21	-2.55	8.97e-07	1.53e-05	XDH	xanthine dehydrogenase [Homo sapiens]
axo06599-r_at	7.24	8.58	-2.55	0.0002	0.0015	OGDHL	oxoglutarate dehydrogenase-like isoform c [Homo sapiens]
axo07506-r_at	8.86	10.21	-2.55	7.58e-05	0.0007	ATP6V1A	ATPase, H+ transporting, lysosomal V1 subunit A [Homo sapiens]
axo21578-f_at	8.32	9.66	-2.55	2.1e-05	0.0002		PREDICTED: similar to MGC84378 protein [Strongylocentrotus purpuratus]
axo12451-f_at	10.45	11.8	-2.55	1.7e-10	8.8e-09	ANXA2	annexin A2 isoform 1 [Homo sapiens]
axo14985-r_at	8.5	9.85	-2.55	3e-11	1.94e-09	DKFZP564O0823	DKFZP564O0823 protein [Homo sapiens]
axo29757-f_at	7.67	9.02	-2.55	2.95e-10	1.4e-08		No Hit
axo31319-f_s_at	10.83	12.18	-2.56	2.14e-05	0.0002		No Hit
axo17960-f_at	9.33	10.68	-2.56	0.0003	0.0025	UBC	ubiquitin C [Homo sapiens]
axo23903-f_at	8.8	10.16	-2.56	6.37e-09	2.04e-07		LOC100126637 protein [Xenopus laevis]
axo00510-f_at	9.15	10.51	-2.57	4.17e-05	0.0004	ATP6V1G3	ATPase, H+ transporting, lysosomal, V1 subunit G3 isoform a [Homo sapiens]
axo27171-f_at	7.58	8.94	-2.57	2.09e-07	4.38e-06		No Hit
axo08554-r_at	7.07	8.43	-2.57	3.6e-07	6.96e-06	CYP2A13	cytochrome P450, family 2, subfamily A, polypeptide 13 [Homo sapiens]
axo13455-f_at	9.48	10.84	-2.58	0.0005	0.0036	METTL7A	methyltransferase like 7A [Homo sapiens]
axo11278-f_at	7.91	9.28	-2.58	0.0001	0.001	PSCA	prostate stem cell antigen preproprotein [Homo sapiens]
axo13130-f_at	6.08	7.45	-2.58	2.94e-06	4.31e-05	MAPRE3	microtubule-associated protein, RPEB family, member 3 [Homo sapiens]
axo06034-f_at	6.47	7.84	-2.58	5.23e-08	1.32e-06	KRT5	keratin 5 [Homo sapiens]
axo06005-r_at	6.35	7.72	-2.58	9.83e-08	2.28e-06	PLCXD2	phosphatidylinositol-specific phospholipase C, X domain containing 2 isoform a [Homo sapiens]
axo20541-f_at	10.54	11.91	-2.58	0.0127	0.0529	HLA-E	major histocompatibility complex, class I, E precursor [Homo sapiens]
axo13177-r_at	4.76	6.14	-2.59	1.39e-07	3.07e-06	CD200	CD200 antigen isoform b [Homo sapiens]
axo04424-f_at	4.88	6.26	-2.6	4.41e-05	0.0004	SSTR2	somatostatin receptor 2 [Homo sapiens]
axo08251-f_at	5.55	6.92	-2.6	0.0019	0.0111	MYH11	smooth muscle myosin heavy chain 11 isoform SM1A [Homo sapiens]
axo29829-f_at	7.86	9.24	-2.6	1.01e-09	4.15e-08		No Hit
axo07251-f_at	10.67	12.05	-2.61	7.1e-09	2.26e-07	GPX1	glutathione peroxidase 1 isoform 1 [Homo sapiens]
axo12581-f_at	10.9	12.28	-2.61	1.2e-07	2.72e-06	UPK3A	uroplakin 3A precursor [Homo sapiens]
axo19741-f_at	8.28	9.66	-2.61	0.0001	0.001	QRICH2	glutamine rich 2 [Homo sapiens]
axo12985-r_at	8.85	10.23	-2.61	3e-13	3.55e-11	EML2	echinoderm microtubule associated protein like 2 [Homo sapiens]
axo10656-f_at	3.13	4.52	-2.62	0.0006	0.004	MYBPH	myosin binding protein H [Homo sapiens]
axo03576-f_at	4.5	5.89	-2.62	4.44e-08	1.14e-06	NAP5	Nck-associated protein 5 isoform 2 [Homo sapiens]
axo31401-f_at	11.03	12.42	-2.62	4.49e-11	2.75e-09		No Hit
axo24686-f_at	6.58	7.98	-2.62	0.0014	0.0085		No Hit
AFFX-ThrX-M_at	7.04	8.44	-2.64	2.42e-08	6.7e-07
axo06328-f_at	9.12	10.53	-2.65	1.32e-06	2.15e-05	LITAF	lipopolysaccharide-induced TNF-alpha factor isoform 1 [Homo sapiens]
axo12023-f_at	7.34	8.75	-2.66	0.0008	0.0054	CIB1	calcium and integrin binding 1 [Homo sapiens]
axo04514-f_at	6.16	7.57	-2.66	4.59e-05	0.0005	DEPDC7	novel 58.3 KDA protein isoform 1 [Homo sapiens]
axo18258-f_at	9.82	11.23	-2.66	6.16e-14	8.84e-12	SDF2L1	stromal cell-derived factor 2-like 1 precursor [Homo sapiens]
axo15546-f_at	7.08	8.49	-2.66	7e-07	1.23e-05	TMEM66	transmembrane protein 66 [Homo sapiens]
axo06991-r_at	7.24	8.66	-2.68	6.85e-06	8.98e-05	ATP6AP1	ATPase, H+ transporting, lysosomal accessory protein 1 precursor [Homo sapiens]
axo25205-f_at	8.62	10.05	-2.69	7.78e-07	1.35e-05		No Hit
axo18136-r_at	7.59	9.02	-2.7	2.55e-11	1.69e-09	ENPP5	ectonucleotide pyrophosphatasephosphodiesterase 5 (putative function) [Homo sapiens]
axo07509-r_at	8.22	9.65	-2.7	8.61e-06	0.0001	ATP6V1B2	vacuolar H+ATPase B2 [Homo sapiens]
axo25979-f_at	10.56	12	-2.71	4.89e-09	1.62e-07		No Hit
axo15716-f_at	5.49	6.94	-2.72	2.81e-07	5.62e-06	RHCG	Rh family, C glycoprotein [Homo sapiens]
axo02706-f_at	6.56	8	-2.72	5.23e-09	1.71e-07	FAM55B	hypothetical protein LOC120406 [Homo sapiens]
axo31486-f_at	8.4	9.85	-2.73	1.45e-08	4.28e-07		No Hit
axo10728-f_at	6.02	7.47	-2.74	3.68e-08	9.73e-07	SCD	stearoyl-CoA desaturase 1 [Homo sapiens]
axo01256-r_at	4.97	6.42	-2.74	2.92e-06	4.29e-05	OSR1	odd-skipped related 1 [Homo sapiens]
axo07325-f_at	9.07	10.53	-2.75	1.59e-11	1.13e-09	GCLC	glutamate-cysteine ligase, catalytic subunit [Homo sapiens]
axo08162-r_at	6.67	8.13	-2.75	2.12e-05	0.0002	CA2	carbonic anhydrase II [Homo sapiens]
axo11234-f_at	4.9	6.36	-2.75	0.0014	0.0087	RTN2	reticulon 2 isoform A [Homo sapiens]
axo21731-f_at	4.97	6.43	-2.75	2.47e-11	1.66e-09		PREDICTED: similar to ORF2-encoded protein [Strongylocentrotus purpuratus]
axo18069-r_at	4.58	6.05	-2.76	0.0038	0.0196	WFDC1	WAP four-disulfide core domain 1 precursor [Homo sapiens]
axo08161-r_at	8.6	10.07	-2.76	2.03e-05	0.0002	CA2	carbonic anhydrase II [Homo sapiens]
axo13803-f_at	5.74	7.21	-2.77	2e-05	0.0002	CPM	carboxypeptidase M precursor [Homo sapiens]
axo24085-f_at	4.33	5.8	-2.77	7.75e-06	9.95e-05		nexin-related serine protease inhibitor [Danio rerio]
axo00011-f_at	8.91	10.39	-2.78	3.14e-05	0.0003	SC5DL	sterol-C5-desaturase [Homo sapiens]
axo27140-f_at	6.73	8.21	-2.79	9.22e-11	5.22e-09		No Hit
axo07348-f_at	6.55	8.03	-2.79	1.54e-09	5.99e-08	HCRTR2	orexin receptor 2 [Homo sapiens]
axo15323-f_at	4.8	6.28	-2.79	1.41e-07	3.12e-06	UMOD	uromodulin precursor [Homo sapiens]
axo04803-r_at	5.51	6.99	-2.79	0.0101	0.0439	DDC	dopa decarboxylase (aromatic L-amino acid decarboxylase) [Homo sapiens]
axo10796-r_at	5.45	6.93	-2.8	0.0012	0.0075	GFPT2	glutamine-fructose-6-phosphate transaminase 2 [Homo sapiens]
axo15324-f_at	6.39	7.88	-2.8	0.0006	0.0043	UMOD	uromodulin precursor [Homo sapiens]
axo13846-f_at	8.49	9.97	-2.8	7.32e-11	4.2e-09	TFCP2L1	LBP-9 [Homo sapiens]
axo09348-f_at	7.66	9.15	-2.81	2.25e-09	8.36e-08	GCM1	glial cells missing homolog a [Homo sapiens]
axo00986-f_at	8.2	9.69	-2.81	4.61e-05	0.0005	NEXN	nexilin (F actin binding protein) [Homo sapiens]
axo17046-r_at	8.47	9.96	-2.82	1.58e-12	1.56e-10	DHTKD1	dehydrogenase E1 and transketolase domain containing protein 1 [Homo sapiens]
axo23973-f_at	8.41	9.9	-2.82	0.0023	0.013		PREDICTED: similar to MGC147117 protein [Taeniopygia guttata]
axo08614-f_at	4.56	6.06	-2.82	9.3e-08	2.18e-06	CYP2C8	cytochrome P450, family 2, subfamily C, polypeptide 8 [Homo sapiens]
axo13091-f_at	5.64	7.15	-2.85	1.5e-07	3.27e-06	CAND2	TBP-interacting protein [Homo sapiens]
axo00222-f_at	11.1	12.61	-2.85	0.0002	0.0014	ENO3	enolase 3 [Homo sapiens]
axo28877-f_at	9.26	10.78	-2.85	4.34e-07	8.15e-06		No Hit
axo14140-f_at	4.55	6.07	-2.85	2.47e-08	6.8e-07	TRIM66	tripartite motif-containing 66 [Homo sapiens]
axo19010-f_at	3.67	5.19	-2.85	5.17e-10	2.28e-08	PRR5	proline rich 5 (renal) isoform 2 [Homo sapiens]
axo28605-f_at	9.71	11.23	-2.87	8.89e-13	9.15e-11		No Hit
axo27383-f_at	7.63	9.16	-2.88	9.42e-09	2.95e-07		No Hit
axo15464-r_at	6.91	8.44	-2.9	9.88e-09	3.08e-07	DERL2	Der1-like domain family, member 2 [Homo sapiens]
axo27671-f_at	7.45	8.99	-2.91	4.11e-10	1.86e-08		No Hit
axo19423-f_at	5.38	6.92	-2.92	1.11e-06	1.85e-05	ECOP	EGFR-coamplified and overexpressed protein [Homo sapiens]
axo06177-f_at	7.72	9.27	-2.93	0.0006	0.0041	NDRG1	N-myc downstream regulated 1 [Homo sapiens]
axo12612-r_at	7.49	9.05	-2.94	7.49e-06	9.69e-05	SCGN	secretagogin precursor [Homo sapiens]
axo12416-f_at	7.61	9.17	-2.94	1.15e-11	8.4e-10	CDC42EP2	Cdc42 effector protein 2 [Homo sapiens]
axo09543-f_at	4.56	6.12	-2.94	0.0259	0.093	FBP2	fructose-1,6-bisphosphatase 2 [Homo sapiens]
axo09742-r_at	7.43	8.99	-2.95	1.97e-08	5.61e-07	CDKN1B	cyclin-dependent kinase inhibitor 1B [Homo sapiens]
axo03089-f_at	10.25	11.81	-2.95	5.62e-07	1.02e-05	KIT	v-kit Hardy-Zuckerman 4 feline sarcoma viral oncogene homolog isoform 1 precursor [Homo sapiens]
axo10687-r_at	5.16	6.73	-2.95	8.02e-08	1.92e-06	PDE1C	phosphodiesterase 1C, calmodulin-dependent 70kDa [Homo sapiens]
axo28854-f_at	8.56	10.12	-2.96	0.0021	0.0122		No Hit
axo25515-f_at	5	6.57	-2.97	2.41e-10	1.18e-08		No Hit
axo11682-f_at	5.06	6.63	-2.97	0.0127	0.0527	TRDN	triadin [Homo sapiens]
axo07495-f_at	11	12.58	-2.98	2.01e-07	4.22e-06	ATP1B2	Na+K+ -ATPase beta 2 subunit [Homo sapiens]
axo19090-f_at	6.76	8.34	-2.99	9.8e-15	1.76e-12	KIAA0319L	dyslexia susceptibility 2-like [Homo sapiens]
axo21661-f_at	6.69	8.27	-2.99	1.18e-08	3.59e-07		PREDICTED: similar to ORF-2, putative RT [Ornithorhynchus anatinus]
axo25825-f_at	3.8	5.38	-2.99	2.87e-05	0.0003		No Hit
axo28658-f_at	6.67	8.26	-3	5.58e-08	1.4e-06		No Hit
axo25995-f_at	9.54	11.13	-3.01	5.88e-07	1.06e-05		No Hit
axo02592-f_at	7.76	9.36	-3.02	2.49e-10	1.21e-08		aldehyde dehydrogenase 1 family, member L2 [Homo sapiens]
axo05057-f_at	10.48	12.08	-3.04	3.13e-08	8.42e-07	HIGD1A	HIG1 domain family, member 1A isoform b [Homo sapiens]
axo17619-f_at	9.49	11.1	-3.05	1.29e-08	3.87e-07	NMRAL1	NmrA-like family domain containing 1 [Homo sapiens]
axo09214-r_at	5.51	7.12	-3.06	0.0011	0.0069	GSTP1	glutathione transferase [Homo sapiens]
axo28583-f_at	4.21	5.82	-3.06	2.39e-09	8.77e-08		No Hit
axo11824-f_at	5.35	6.97	-3.07	0.0088	0.0391	PDGFRL	platelet-derived growth factor receptor-like protein [Homo sapiens]
axo17626-f_at	5.83	7.45	-3.08	8.85e-08	2.09e-06	DSCAML1	Down syndrome cell adhesion molecule like 1 [Homo sapiens]
axo09591-f_at	3.03	4.65	-3.08	4.21e-12	3.48e-10	FCGBP	Fc fragment of IgG binding protein [Homo sapiens]
axo07333-f_at	5.69	7.31	-3.08	1.2e-05	0.0001	GSTA4	glutathione S-transferase alpha 4 [Homo sapiens]
axo11129-r_at	4.98	6.6	-3.09	4.14e-07	7.82e-06	ABCA1	ATP-binding cassette, sub-family A member 1 [Homo sapiens]
axo12238-r_at	7.77	9.4	-3.09	2.72e-09	9.75e-08	SULT1C4	sulfotransferase family, cytosolic, 1C, member 2 [Homo sapiens]
axo28423-f_at	3.82	5.45	-3.1	0.0029	0.0155		No Hit
axo21868-f_at	9.39	11.03	-3.1	0.0013	0.0083		PREDICTED: hypothetical protein [Danio rerio]
axo07516-f_at	4.58	6.21	-3.1	2.51e-07	5.09e-06	BAI1	brain-specific angiogenesis inhibitor 1 precursor [Homo sapiens]
axo04563-f_at	9.23	10.87	-3.11	6.95e-15	1.33e-12	OAT	ornithine aminotransferase precursor [Homo sapiens]
axo03121-f_at	5.26	6.9	-3.11	1.32e-07	2.95e-06	PHYH	phytanoyl-CoA 2-hydroxylase isoform b precursor [Homo sapiens]
axo30304-f_at	10.09	11.72	-3.11	1.16e-06	1.93e-05		No Hit
axo19648-f_at	3.6	5.24	-3.12	0.0002	0.0019	C1QTNF2	C1q and tumor necrosis factor related protein 2 [Homo sapiens]
axo29862-f_at	7.88	9.52	-3.12	0.0066	0.0311		No Hit
axo06904-r_at	6.13	7.77	-3.13	5.91e-14	8.6e-12	AIFM3	apoptosis-inducing factor, mitochondrion-associated, 3 isoform 3 [Homo sapiens]
axo29147-f_at	8.97	10.62	-3.14	2.52e-11	1.68e-09		No Hit
axo10237-r_at	4.46	6.12	-3.16	2.43e-09	8.87e-08	PSPH	phosphoserine phosphatase [Homo sapiens]
axo29870-f_at	5.71	7.37	-3.16	3.25e-07	6.32e-06		No Hit
axo17047-f_at	4.15	5.81	-3.16	1.94e-08	5.52e-07	TMEM55A	transmembrane protein 55A [Homo sapiens]
axo05732-f_at	3.74	5.4	-3.17	0.0009	0.006	TNIP3	TNFAIP3 interacting protein 3 [Homo sapiens]
axo23017-f_at	3.88	5.55	-3.17	3.17e-11	2.03e-09		PREDICTED: hypothetical protein [Pan troglodytes]
axo11135-r_at	4.55	6.22	-3.19	5.05e-10	2.23e-08	BCAT1	branched chain aminotransferase 1, cytosolic [Homo sapiens]
axo19866-f_at	4.78	6.46	-3.19	3e-10	1.42e-08	SLC25A33	mitochondrial carrier protein MGC4399 [Homo sapiens]
axo19971-f_at	4.42	6.1	-3.2	0.0002	0.0017	TNXB	tenascin XB isoform 2 [Homo sapiens]
axo08854-f_at	11.36	13.04	-3.2	1.21e-06	2e-05	SPR	sepiapterin reductase (7,8-dihydrobiopterin:NADP+ oxidoreductase) [Homo sapiens]
axo16899-f_at	4.43	6.12	-3.23	7.42e-05	0.0007	PDLIM5	PDZ and LIM domain 5 isoform e [Homo sapiens]
axo05722-r_at	6.55	8.24	-3.23	0.0006	0.0041	ELFN1	extracellular leucine-rich repeat and fibronectin type III domain containing 1 [Homo sapiens]
axo18300-f_at	8.85	10.54	-3.23	8.45e-08	2e-06	CA7	carbonic anhydrase VII isoform 2 [Homo sapiens]
axo00271-f_at	6.07	7.76	-3.23	0.0012	0.0076	LPAR1	lysophosphatidic acid receptor 1 [Homo sapiens]
axo04894-r_at	6.39	8.09	-3.24	5.09e-11	3.06e-09	ACCN1	amiloride-sensitive cation channel 1, neuronal isoform 2 [Homo sapiens]
axo29182-f_at	8.13	9.83	-3.24	0.0334	0.1129		No Hit
axo08792-f_at	6.32	8.02	-3.24	1.06e-05	0.0001	SLC16A1	solute carrier family 16, member 1 [Homo sapiens]
axo20688-f_at	10.35	12.05	-3.24	1.43e-15	3.34e-13	HSP90B1	heat shock protein 90kDa beta, member 1 [Homo sapiens]
axo02865-r_at	9.44	11.15	-3.27	7.77e-12	6e-10	ASNS	asparagine synthetase [Homo sapiens]
axo01759-f_at	7.58	9.29	-3.27	2.01e-06	3.08e-05	FYN	protein-tyrosine kinase fyn isoform c [Homo sapiens]
axo02571-r_at	3.96	5.67	-3.28	2.18e-12	2.03e-10	PRR5	proline rich 5 (renal) isoform 1 [Homo sapiens]
axo09218-f_at	7.96	9.68	-3.29	7.9e-11	4.49e-09	ACOX3	acyl-Coenzyme A oxidase 3 isoform a [Homo sapiens]
axo29721-f_at	8.57	10.29	-3.3	0.0113	0.0479		No Hit
axo09754-r_s_at	5.16	6.88	-3.3	0.0083	0.0374	CTSS	cathepsin S preproprotein [Homo sapiens]
axo14675-f_at	9.03	10.75	-3.3	3.02e-10	1.43e-08	ACSBG1	lipidosin [Homo sapiens]
axo24946-f_at	3.33	5.07	-3.32	6.68e-05	0.0006		No Hit
axo25292-f_at	5.83	7.56	-3.32	2.71e-07	5.44e-06		No Hit
axo11826-r_at	6.22	7.96	-3.33	9.14e-06	0.0001	ENPP1	ectonucleotide pyrophosphatasephosphodiesterase 1 [Homo sapiens]
axo09663-f_at	4.24	5.97	-3.33	2.24e-07	4.63e-06	SELENBP1	selenium binding protein 1 [Homo sapiens]
axo15216-f_at	7.76	9.49	-3.33	3.67e-14	5.63e-12	SH3YL1	SH3 domain containing, Ysc84-like 1 isoform 1 [Homo sapiens]
axo25179-f_at	5.94	7.67	-3.33	0.0197	0.0748		No Hit
axo25763-f_at	5.77	7.52	-3.35	1.61e-12	1.57e-10		No Hit
axo18390-r_at	4.57	6.31	-3.35	0.0008	0.0051	MLF1	myeloid leukemia factor 1 isoform 1 [Homo sapiens]
axo02551-r_at	7.05	8.79	-3.36	1.28e-11	9.22e-10	SFXN2	sideroflexin 2 [Homo sapiens]
axo26191-f_at	9.4	11.15	-3.36	7.81e-10	3.31e-08		No Hit
axo30464-f_at	7.41	9.16	-3.37	0.0007	0.0048		No Hit
axo07832-r_at	9.11	10.86	-3.37	3.2e-10	1.51e-08	FRK	fyn-related kinase [Homo sapiens]
axo31424-f_at	8.23	9.99	-3.37	1.39e-07	3.08e-06		No Hit
axo29369-f_at	5.73	7.48	-3.38	2.93e-08	7.97e-07		No Hit
axo12277-f_at	8.92	10.69	-3.4	2.32e-10	1.15e-08	IQGAP2	IQ motif containing GTPase activating protein 2 [Homo sapiens]
axo15545-f_at	7.27	9.03	-3.4	2.31e-08	6.48e-07	TMEM66	transmembrane protein 66 [Homo sapiens]
axo14680-f_at	4.88	6.65	-3.42	6.79e-05	0.0007	ACSBG1	lipidosin [Homo sapiens]
axo18486-r_at	6.05	7.84	-3.46	2.05e-10	1.03e-08	ELOVL4	elongation of very long chain fatty acids-like 4 [Homo sapiens]
axo21901-f_at	6.96	8.77	-3.5	5.85e-11	3.46e-09		PREDICTED: similar to Nck-associated protein 5 [Taeniopygia guttata]
axo08615-r_at	6.67	8.48	-3.5	1.54e-08	4.52e-07	CYP2C8	cytochrome P450, family 2, subfamily C, polypeptide 8 [Homo sapiens]
AFFX-ThrX-5_at	4.74	6.55	-3.51	6.27e-16	1.59e-13
axo08375-r_at	9.83	11.64	-3.52	3.84e-06	5.45e-05	PFKFB1	6-phosphofructo-2-kinasefructose-2,6-biphosphatase 1 [Homo sapiens]
axo09629-f_at	7.74	9.55	-3.52	1.37e-10	7.34e-09	NQO1	NAD(P)H menadione oxidoreductase 1, dioxin-inducible isoform a [Homo sapiens]
axo03234-r_at	3.53	5.36	-3.55	0.0242	0.088	ADSSL1	adenylosuccinate synthase like 1 isoform 1 [Homo sapiens]
axo00925-f_at	7.1	8.93	-3.57	0.0001	0.0011	DEPDC7	novel 58.3 KDA protein isoform 2 [Homo sapiens]
axo11883-f_at	11.74	13.58	-3.59	4.81e-06	6.64e-05	PRPH	peripherin [Homo sapiens]
axo19990-f_at	6.18	8.02	-3.59	1.44e-07	3.17e-06	HOPX	HOP homeobox isoform a [Homo sapiens]
axo26183-f_at	8.09	9.93	-3.59	3.49e-10	1.61e-08		No Hit
axo00180-f_at	7.41	9.25	-3.6	4.28e-08	1.11e-06	HK2	hexokinase 2 [Homo sapiens]
axo14677-f_at	6.12	7.97	-3.6	9.63e-09	3.01e-07	ACSBG1	lipidosin [Homo sapiens]
axo31517-f_at	6.86	8.71	-3.6	2.3e-09	8.51e-08		No Hit
axo29856-f_at	5.1	6.95	-3.61	3.64e-06	5.2e-05		No Hit
axo25163-f_at	6.47	8.33	-3.63	3.26e-07	6.33e-06		No Hit
axo01084-r_at	6	7.86	-3.64	0.0003	0.0023	C1orf51	hypothetical protein LOC148523 [Homo sapiens]
axo28206-f_at	6.41	8.28	-3.65	1.52e-10	8.02e-09		No Hit
axo02457-f_at	3.75	5.63	-3.67	4.27e-10	1.92e-08	FADS6	fatty acid desaturase domain family, member 6 [Homo sapiens]
axo29708-f_at	3.8	5.69	-3.71	0.0004	0.0029		No Hit
axo24901-f_at	6.36	8.25	-3.71	5.56e-11	3.3e-09		No Hit
axo08551-f_at	6.45	8.35	-3.74	2.65e-09	9.57e-08	CYP2A13	cytochrome P450, family 2, subfamily A, polypeptide 13 [Homo sapiens]
axo08331-r_at	9.84	11.75	-3.74	1.34e-07	2.98e-06	PEBP1	prostatic binding protein [Homo sapiens]
axo31341-f_at	8.28	10.18	-3.75	4.69e-09	1.57e-07		No Hit
axo03469-r_at	6.85	8.76	-3.76	1.19e-08	3.61e-07	SLC25A29	solute carrier family 25, member 29 [Homo sapiens]
axo02083-f_at	9.15	11.09	-3.85	4.92e-06	6.78e-05	CYP4F22	cytochrome P450, family 4, subfamily F, polypeptide 22 [Homo sapiens]
axo24823-f_at	5.9	7.86	-3.9	0.0022	0.0124		No Hit
axo07273-r_at	4.59	6.55	-3.9	0.0064	0.0301	FAAH	fatty acid amide hydrolase [Homo sapiens]
AFFX-r2-Bs-thr-5_s_at	5.72	7.69	-3.9	2.78e-09	9.93e-08
axo05704-f_at	4.97	6.94	-3.91	0.0241	0.0877	SPON2	spondin 2, extracellular matrix protein [Homo sapiens]
axo03135-r_at	5.03	7.01	-3.95	3.5e-05	0.0004	C1QTNF1	C1q and tumor necrosis factor related protein 1 [Homo sapiens]
axo19438-f_at	5.84	7.82	-3.96	3e-11	1.94e-09	SLC2A11	glucose transporter protein 10 isoform a [Homo sapiens]
axo30922-f_at	6.34	8.35	-4.02	0.0001	0.0009		No Hit
axo04999-f_at	3.75	5.78	-4.08	0.0006	0.0041	AMPD1	adenosine monophosphate deaminase 1 (isoform M) [Homo sapiens]
axo08211-f_at	7.84	9.88	-4.11	0.0006	0.0044	MUC2	mucin 2 precursor [Homo sapiens]
axo30509-f_at	3.42	5.46	-4.11	0.0011	0.0069		No Hit
axo20107-f_at	8.13	10.17	-4.11	3.01e-14	4.68e-12	AIFM2	apoptosis-inducing factor (AIF)-like mitchondrion-associated inducer of death [Homo sapiens]
axo19992-f_at	6.46	8.5	-4.11	4.58e-05	0.0005	ACSS1	acyl-CoA synthetase short-chain family member 1 [Homo sapiens]
axo13377-f_at	3.87	5.92	-4.12	2.66e-06	3.96e-05	PCOLCE2	procollagen C-endopeptidase enhancer 2 [Homo sapiens]
axo18653-f_at	8.39	10.45	-4.15	1.76e-09	6.7e-08	AACS	acetoacetyl-CoA synthetase [Homo sapiens]
axo15017-f_at	5.52	7.58	-4.15	0.0464	0.1448	OLFML2B	olfactomedin-like 2B [Homo sapiens]
axo07367-f_at	6.29	8.35	-4.16	0.0496	0.1522	HSPB1	heat shock protein beta-1 [Homo sapiens]
axo23135-f_at	4.68	6.74	-4.17	1.45e-09	5.72e-08		PREDICTED: hypothetical protein [Danio rerio]
axo06932-f_at	5.75	7.81	-4.17	0.0412	0.1322	SLC25A4	solute carrier family 25 (mitochondrial carrier; adenine nucleotide translocator), member 4 [Homo sapiens]
axo15104-f_at	3.73	5.8	-4.19	2.01e-09	7.59e-08	MOXD1	monooxygenase, DBH-like 1 isoform 2 [Homo sapiens]
axo05165-f_at	4.08	6.14	-4.2	0.0016	0.0098	ACTN3	actinin, alpha 3 [Homo sapiens]
axo13582-f_at	5.49	7.56	-4.21	0.012	0.0505	PTPLA	protein tyrosine phosphatase-like, member A [Homo sapiens]
axo02108-f_at	2.91	5.01	-4.28	3.89e-13	4.44e-11	GABRG1	gamma-aminobutyric acid A receptor, gamma 1 precursor [Homo sapiens]
axo19467-f_at	4.48	6.58	-4.3	2.51e-11	1.67e-09	ACSBG2	bubblegum related protein [Homo sapiens]
axo10844-f_at	5.54	7.68	-4.39	0.0031	0.0166	ACTC1	cardiac muscle alpha actin 1 proprotein [Homo sapiens]
axo31574-f_at	6.41	8.55	-4.4	0.0049	0.024		No Hit
axo31671-f_s_at	8.4	10.54	-4.42	9.96e-05	0.0009		No Hit
axo15309-f_at	8.77	10.93	-4.45	5.28e-07	9.7e-06	UMOD	uromodulin precursor [Homo sapiens]
axo24796-f_at	6.76	8.91	-4.46	2.73e-13	3.26e-11		No Hit
axo08351-f_at	4.93	7.09	-4.46	3.92e-05	0.0004	PCOLCE	procollagen C-endopeptidase enhancer [Homo sapiens]
axo27716-f_at	3.55	5.71	-4.47	0.002	0.0116		No Hit
axo24665-f_at	5.36	7.55	-4.55	0.0034	0.0181		No Hit
axo04639-f_at	3.31	5.5	-4.56	0.0034	0.0179	LDB3	LIM domain binding 3 isoform 4 [Homo sapiens]
axo21582-f_at	4.86	7.06	-4.59	1.91e-05	0.0002		PREDICTED: similar to mucin 17 [Danio rerio]
axo08083-f_at	11.94	14.14	-4.59	7.7e-05	0.0007	LGALS1	galectin-1 [Homo sapiens]
axo05783-r_at	3.74	5.94	-4.59	1.69e-09	6.49e-08	ELMOD1	ELMOCED-12 domain containing 1 isoform 2 [Homo sapiens]
axo31622-f_s_at	8.03	10.24	-4.64	3.33e-06	4.83e-05		No Hit
axo06592-f_at	4.35	6.57	-4.66	5.97e-06	8.02e-05	CHRDL1	chordin-like 1 isoform 2 precursor [Homo sapiens]
axo31568-f_at	6.7	8.92	-4.68	6.53e-09	2.09e-07		No Hit
axo12227-f_at	5.67	7.91	-4.73	3.32e-12	2.83e-10	FUT9	fucosyltransferase 9 (alpha (1,3) fucosyltransferase) [Homo sapiens]
axo23974-f_at	5.49	7.75	-4.77	2.74e-07	5.48e-06		chemokine C-C motif ligand 19 precursor [Anas platyrhynchos]
axo09953-f_s_at	4.75	7.01	-4.79	0.0065	0.0305	ATP2A1	ATPase, Ca++ transporting, fast twitch 1 isoform b [Homo sapiens]
axo28883-f_at	4.5	6.77	-4.84	5.88e-05	0.0006		No Hit
axo27829-f_at	3.82	6.1	-4.85	9.4e-10	3.92e-08		No Hit
axo01385-f_at	5.35	7.63	-4.85	1.28e-11	9.22e-10	GPRC6A	G protein-coupled receptor, family C, group 6, member A [Homo sapiens]
axo15862-f_at	3.16	5.44	-4.88	1.49e-05	0.0002	GNG13	guanine nucleotide binding protein (G protein), gamma 13 [Homo sapiens]
axo07684-f_at	7.2	9.5	-4.92	1.29e-06	2.11e-05	CRYAB	crystallin, alpha B [Homo sapiens]
axo31395-f_at	6.67	8.99	-4.99	0.0051	0.025		No Hit
axo00020-f_at	7.5	9.82	-5.01	0.0188	0.0723	CASP7	caspase 7 isoform delta [Homo sapiens]
axo05926-f_at	6.26	8.6	-5.03	1.82e-16	5.46e-14	HYOU1	hypoxia up-regulated 1 precursor [Homo sapiens]
axo10458-f_at	3.37	5.71	-5.05	0.0265	0.0948	ADIPOQ	adiponectin precursor [Homo sapiens]
axo11787-f_at	9.43	11.77	-5.06	1.49e-05	0.0002	NNMT	nicotinamide N-methyltransferase [Homo sapiens]
axo20196-r_at	4.79	7.15	-5.12	1.03e-09	4.21e-08	TGFBR2	transforming growth factor, beta receptor II isoform A precursor [Homo sapiens]
axo05092-f_at	3.91	6.28	-5.17	0.0002	0.0019	MYH2	myosin, heavy chain 2, skeletal muscle, adult [Homo sapiens]
axo18143-f_at	6.32	8.73	-5.3	1.94e-06	2.99e-05	ALOXE3	arachidonate lipoxygenase 3 [Homo sapiens]
axo17639-f_at	4.1	6.54	-5.43	0.0018	0.0104		hedgehog acyltransferase-like [Homo sapiens]
axo19668-f_at	4.58	7.03	-5.46	1.01e-09	4.15e-08	PRSS27	marapsin [Homo sapiens]
axo15434-f_at	8.32	10.79	-5.53	0.0373	0.1225	FBN1	fibrillin 1 precursor [Homo sapiens]
axo00298-f_at	7.21	9.69	-5.57	1.84e-05	0.0002	PSAT1	phosphoserine aminotransferase isoform 1 [Homo sapiens]
axo12885-f_at	3.86	6.36	-5.65	0.0022	0.0125	MMRN1	multimerin 1 [Homo sapiens]
axo16065-f_at	4.34	6.85	-5.69	2.49e-06	3.72e-05	DMBT1	deleted in malignant brain tumors 1 isoform c precursor [Homo sapiens]
axo11879-f_at	7.94	10.45	-5.72	1.89e-12	1.81e-10	DNAJC3	DnaJ (Hsp40) homolog, subfamily C, member 3 [Homo sapiens]
axo13476-f_at	8.83	11.41	-5.96	0.0171	0.067	OGN	osteoglycin preproprotein [Homo sapiens]
axo22112-f_at	5.02	7.6	-5.97	1.24e-08	3.74e-07		PREDICTED: hypothetical protein [Danio rerio]
axo06261-f_s_at	8.41	11	-6.02	0.0156	0.0619	POSTN	periostin, osteoblast specific factor isoform 3 [Homo sapiens]
axo15275-f_at	3.91	6.5	-6.04	0.0012	0.0075	TRIM72	tripartite motif-containing 72 [Homo sapiens]
axo30218-f_at	4.6	7.2	-6.07	0.0006	0.0044		No Hit
axo07606-f_at	8.5	11.13	-6.16	3.88e-13	4.44e-11	CDO1	cysteine dioxygenase [Homo sapiens]
axo13672-r_at	5.2	7.83	-6.18	0.0163	0.0643	SMPX	small muscle protein, X-linked [Homo sapiens]
axo02691-f_at	4.73	7.39	-6.32	7.7e-08	1.86e-06	EPHA5	ephrin receptor EphA5 isoform b precursor [Homo sapiens]
axo25678-f_at	4.15	6.82	-6.39	1.19e-06	1.95e-05		No Hit
axo11805-f_at	5.04	7.72	-6.41	0.0014	0.0083	OCM2	oncomodulin-like [Homo sapiens]
axo09921-f_at	3.92	6.61	-6.43	1e-07	2.32e-06	CARTPT	cocaine- and amphetamine-regulated transcript [Homo sapiens]
axo02690-f_s_at	4.47	7.17	-6.5	0.0095	0.042	PKM2	pyruvate kinase, muscle isoform M1 [Homo sapiens]
axo07311-f_at	4.21	6.93	-6.6	0.0054	0.0264	GATM	L-arginine:glycine amidinotransferase precursor [Homo sapiens]
axo03266-r_at	8.44	11.21	-6.83	3.48e-06	5.01e-05	KRT12	keratin 12 [Homo sapiens]
axo12130-f_at	7.17	9.96	-6.9	0.0059	0.0283	POSTN	periostin, osteoblast specific factor isoform 1 [Homo sapiens]
axo06029-f_at	7.62	10.41	-6.9	5.13e-09	1.68e-07	KRT5	keratin 5 [Homo sapiens]
axo02299-f_at	6.48	9.27	-6.9	2.12e-06	3.21e-05	PCSK9	proprotein convertase subtilisinkexin type 9 preproprotein [Homo sapiens]
axo16020-f_s_at	3.02	5.82	-6.96	0.0443	0.14	MYH4	myosin, heavy polypeptide 4, skeletal muscle [Homo sapiens]
axo28306-f_at	4.21	7.02	-6.98	2.25e-06	3.4e-05		No Hit
axo11505-f_at	4.06	6.89	-7.1	5.78e-05	0.0006	MAT2A	methionine adenosyltransferase II, alpha [Homo sapiens]
axo00600-f_at	3.52	6.35	-7.11	0.0129	0.0533	TTN	titin isoform novex-3 [Homo sapiens]
axo10548-f_at	7.11	9.97	-7.27	3.86e-09	1.32e-07	PTGES	prostaglandin E synthase [Homo sapiens]
axo25161-f_at	4.59	7.46	-7.34	9.57e-13	9.75e-11		No Hit
axo31590-f_at	5.91	8.79	-7.36	4.96e-11	3e-09		No Hit
axo05262-r_at	4.22	7.14	-7.55	0.0047	0.0233	DHRS7C	dehydrogenasereductase (SDR family) member 7C [Homo sapiens]
axo17318-f_at	4.52	7.44	-7.57	0.0003	0.0025	MYOM1	myomesin 1 isoform b [Homo sapiens]
axo26423-f_at	11.85	14.84	-7.91	0.0003	0.0022		No Hit
axo08081-f_at	7.96	10.97	-8.05	2.74e-07	5.48e-06	LECT2	leukocyte cell-derived chemotaxin 2 precursor [Homo sapiens]
axo00270-f_at	4.01	7.02	-8.07	1.17e-15	2.79e-13	CRYBA2	crystallin, beta A2 [Homo sapiens]
axo24475-f_at	3.71	6.74	-8.16	0.0004	0.0032		capping protein (actin filament) muscle Z-line, beta [Gallus gallus]
axo02697-f_at	4.68	7.77	-8.49	6.44e-07	1.15e-05	OLFML2A	olfactomedin-like 2A [Homo sapiens]
axo09592-f_at	3.7	6.79	-8.49	1.95e-13	2.44e-11	FCGBP	Fc fragment of IgG binding protein [Homo sapiens]
axo06388-r_at	6.69	9.78	-8.54	1e-05	0.0001	AK1	adenylate kinase 1 [Homo sapiens]
axo05917-f_at	4.81	7.95	-8.82	1.97e-15	4.25e-13	PLCH1	phospholipase C-like 3 isoform a [Homo sapiens]
axo02312-f_at	4.84	8.01	-9.03	3.8e-06	5.4e-05	ZPLD1	zona pellucida-like domain containing 1 [Homo sapiens]
axo09517-r_at	4.72	7.91	-9.08	0.0378	0.1237	MYH13	myosin, heavy polypeptide 13, skeletal muscle [Homo sapiens]
axo08084-f_at	11.67	14.86	-9.1	4.53e-05	0.0005	LGALS1	galectin-1 [Homo sapiens]
axo24290-r_at	5.09	8.3	-9.23	1.51e-11	1.07e-09		Peroxisomal trans-2-enoyl-CoA reductase [Esox lucius]
axo09009-f_at	6.54	9.75	-9.29	0.0003	0.0021	CLEC3B	C-type lectin domain family 3, member B [Homo sapiens]
axo11558-r_at	4.76	7.97	-9.29	0.001	0.0067	MYH1	myosin, heavy chain 1, skeletal muscle, adult [Homo sapiens]
axo11675-f_at	5.49	8.71	-9.34	0.0103	0.0446	KBTBD10	kelch repeat and BTB (POZ) domain containing 10 [Homo sapiens]
axo10182-f_at	5.45	8.75	-9.88	3.04e-06	4.44e-05	PTGDS	prostaglandin H2 D-isomerase [Homo sapiens]
axo18125-f_at	5.39	8.72	-10.02	0.0012	0.0078	MYOZ1	myozenin 1 [Homo sapiens]
axo13452-f_at	4.67	8.02	-10.22	1.02e-16	3.29e-14	METTL7A	methyltransferase like 7A [Homo sapiens]
axo22879-f_at	10.51	13.9	-10.46	0.0284	0.1		surfactant, pulmonary-associated protein C [Xenopus (Silurana) tropicalis]
axo26094-f_at	6.05	9.58	-11.6	0.0005	0.0037		No Hit
axo21940-r_at	7.26	10.82	-11.77	9.37e-07	1.59e-05		sodefrin precursor-like factor [Desmognathus monticola]
axo04719-r_at	4.91	8.47	-11.84	0.0008	0.0051	PFKM	phosphofructokinase, muscle [Homo sapiens]
axo12741-f_at	4.36	7.93	-11.87	5.21e-14	7.81e-12	SLC14A2	solute carrier family 14 (urea transporter), member 2 [Homo sapiens]
axo04402-f_s_at	8.47	12.04	-11.87	0.0016	0.0098	TPM3	tropomyosin 3 isoform 5 [Homo sapiens]
axo05008-f_at	5.54	9.11	-11.87	0.0024	0.0133	SRL	sarcalumenin [Homo sapiens]
axo06808-f_at	6.8	10.42	-12.3	3.04e-08	8.22e-07	LDLR	low density lipoprotein receptor precursor [Homo sapiens]
axo11561-f_at	3.15	6.9	-13.47	0.0003	0.0021	MYH1	myosin, heavy chain 1, skeletal muscle, adult [Homo sapiens]
axo04380-f_s_at	4.99	8.75	-13.53	0.0257	0.0923	MYH7	myosin, heavy chain 7, cardiac muscle, beta [Homo sapiens]
axo29550-f_at	4.74	8.5	-13.54	1.6e-10	8.39e-09		No Hit
axo31678-f_at	4.56	8.33	-13.64	0.0104	0.0449		No Hit
axo21387-f_s_at	6.4	10.24	-14.37	0.0008	0.0053	MYL1	fast skeletal myosin alkali light chain 1 isoform 1f [Homo sapiens]
axo07025-f_at	4.22	8.12	-14.97	0.0007	0.0046	CASQ1	calsequestrin 1 [Homo sapiens]
axo02599-f_at	4.62	8.55	-15.32	0.013	0.0537	WFDC8	WAP four-disulfide core domain 8 precursor [Homo sapiens]
axo10178-f_at	5.56	9.5	-15.38	0.0008	0.0055	MYBPC2	myosin binding protein C, fast type [Homo sapiens]
axo07404-f_at	5.45	9.53	-16.94	0.001	0.0067	ACTA2	alpha 2 actin [Homo sapiens]
axo10242-f_at	6.14	10.27	-17.41	2.47e-10	1.2e-08	PTGS1	prostaglandin-endoperoxide synthase 1 isoform 1 precursor [Homo sapiens]
axo01126-f_at	4.73	8.92	-18.3	5.75e-16	1.48e-13	PEBP4	phosphatidylethanolamine-binding protein 4 [Homo sapiens]
axo08238-r_at	8.48	12.68	-18.38	0.0162	0.0639	MYH3	myosin, heavy chain 3, skeletal muscle, embryonic [Homo sapiens]
axo09691-f_at	5.37	9.58	-18.5	0.0004	0.0029	MYOM2	myomesin 2 [Homo sapiens]
axo25988-f_at	3.69	7.92	-18.7	9.34e-14	1.28e-11		No Hit
axo04367-f_at	4.51	8.75	-18.91	2.06e-14	3.33e-12	CAPSL	calcyphosine-like [Homo sapiens]
axo00555-f_at	5.76	10.22	-21.94	0.0051	0.0251	TTN	titin isoform N2-A [Homo sapiens]
axo07781-f_at	6.99	11.5	-22.76	3.56e-08	9.47e-07	ADH4	alcohol dehydrogenase 4 [Homo sapiens]
axo08602-f_at	9.17	13.77	-24.21	0.0036	0.0188	PVALB	parvalbumin [Homo sapiens]
axo00332-r_at	8.93	13.55	-24.63	0.0026	0.0143	MYL1	fast skeletal myosin alkali light chain 1 isoform 3f [Homo sapiens]
axo10191-f_at	5.3	9.96	-25.24	0.0006	0.0044	NEB	nebulin [Homo sapiens]
axo07625-f_at	8	12.67	-25.4	0.0005	0.0036	CKM	muscle creatine kinase [Homo sapiens]
axo18223-r_at	5.78	10.48	-25.91	9.31e-08	2.18e-06	GRIK2	glutamate receptor, ionotropic, kainate 2 isoform 1 precursor [Homo sapiens]
axo08604-f_at	5.35	10.06	-26.16	9.19e-07	1.56e-05	PVALB	parvalbumin [Homo sapiens]
axo19429-f_s_at	6.19	10.92	-26.46	0.0046	0.023	TPM1	tropomyosin 1 alpha chain isoform 4 [Homo sapiens]
axo10842-f_at	7.17	12.1	-30.52	0.001	0.0063	ACTC1	cardiac muscle alpha actin 1 proprotein [Homo sapiens]
axo29542-f_at	5.09	10.06	-31.45	0.0003	0.0022		No Hit
axo04905-f_s_at	8.21	13.22	-32.13	0.0004	0.0029	ACTA1	actin, alpha 1, skeletal muscle [Homo sapiens]
axo07460-f_at	3.69	8.7	-32.16	1.45e-06	2.33e-05	APOD	apolipoprotein D precursor [Homo sapiens]
axo07405-f_s_at	7.93	12.97	-33.07	0.0003	0.0021	ACTA2	alpha 2 actin [Homo sapiens]
axo03633-f_at	4.39	9.44	-33.11	0.0004	0.0028		PREDICTED: similar to MUC19 [Homo sapiens]
axo19410-f_s_at	7.14	12.24	-34.41	0.0018	0.0106	TPM1	tropomyosin 1 alpha chain isoform 1 [Homo sapiens]
axo09010-f_at	7.79	12.91	-34.82	0.0002	0.0019	TNNC2	fast skeletal muscle troponin C [Homo sapiens]
axo08603-f_at	7.88	13.02	-35.28	0.0004	0.0029	PVALB	parvalbumin [Homo sapiens]
axo20945-f_at	3.9	9.05	-35.36	0.005	0.0247	TNNT3	troponin T3, skeletal, fast isoform 2 [Homo sapiens]
axo18124-f_at	4.35	9.56	-37.17	0.0004	0.0029	MYOZ1	myozenin 1 [Homo sapiens]
axo26184-f_at	6.27	11.5	-37.49	0.0005	0.0036		No Hit
axo30154-f_at	3.28	8.53	-38.22	9.69e-28	5.99e-24		No Hit
axo31607-f_at	3.88	9.14	-38.27	0.0002	0.0017		No Hit
axo15011-r_at	4.3	9.63	-40.36	4.38e-10	1.97e-08	ABI3BP	ABI gene family, member 3 (NESH) binding protein [Homo sapiens]
axo08599-f_at	7.04	12.38	-40.44	3.72e-06	5.3e-05	PTX3	pentraxin 3 [Homo sapiens]
axo31635-f_at	5.72	11.08	-41.06	0.0005	0.0033		No Hit
axo13329-f_at	7.9	13.36	-44.11	0.0008	0.0053	MYLPF	myosin light chain, phosphorylatable, fast skeletal muscle [Homo sapiens]
axo09013-r_at	5.98	11.54	-47.16	0.0006	0.0043	TNNI2	fast-twitch skeletal muscle troponin I isoform 1 [Homo sapiens]
axo08601-f_at	7.11	12.7	-48.29	0.0003	0.0021	PVALB	parvalbumin [Homo sapiens]
axo04903-f_x_at	4.85	10.68	-57.07	0.0007	0.0047	ACTA1	actin, alpha 1, skeletal muscle [Homo sapiens]
axo17949-f_at	5.31	11.31	-64	2.98e-11	1.94e-09	DHRS4	peroxisomal short-chain alcohol dehydrogenase [Homo sapiens]
axo31353-f_at	6.63	12.98	-81.7	1.31e-09	5.23e-08		No Hit
axo11785-f_at	3.46	9.91	-87.21	6.08e-19	3.05e-16	NNMT	nicotinamide N-methyltransferase [Homo sapiens]
axo09602-f_at	4.88	12.58	-207.36	1.71e-12	1.65e-10	FCGBP	Fc fragment of IgG binding protein [Homo sapiens]
axo11782-f_at	4.3	12.49	-291.66	1.92e-21	2.14e-18	NNMT	nicotinamide N-methyltransferase [Homo sapiens]
axo09595-f_at	3.85	12.18	-320.57	2.68e-23	5.38e-20	FCGBP	Fc fragment of IgG binding protein [Homo sapiens]
axo08086-f_at	3.77	12.84	-538.23	3.36e-13	3.92e-11	LGALS3	galectin 3 [Homo sapiens]
axo03342-f_at	3.73	13.06	-646.36	6.83e-18	2.98e-15	LGALS8	galectin-8 isoform a [Homo sapiens]
axo08087-f_at	3.92	13.66	-854.33	4.24e-13	4.65e-11	LGALS3	galectin 3 [Homo sapiens]
axo22089-f_at	3.34	14.04	-1662.77	2.28e-14	3.62e-12		hypothetical protein LOC613112 [Xenopus (Silurana) tropicalis]
