# Supplementary material for: Matrisomal components involved in regenerative wound healing in axolotl and Acomys: implications for biomaterial development
Source: Royal Society of Chemistry journal article supplement (doi:10.1039/d3bm00835e), 2023-01-01
Supplement: d3bm00835e5.xlsx [file d3bm00835e5.xlsx]

## Sheet: 1. Matrisome d7 vs d14
Matrisome master list Gene Symbol	Gene Name	Core matrisome - collagens					Core matrisome - ECM glycoproteins							Core matrisome - Proteoglycans							Matrisome associated - ECM affiliated							Matrisome associated - secreted factors							Matrisome associated - regulators
5430419D17Rik	RIKEN cDNA 5430419D17 gene	Day 7	Fold-change	Day 14	fold change		Core Matrisome	gene name	Day 7 FC	Core matrisome	gene name	day 14 FC		Proteoglycans	gene name	Day 7 FC	Proteoglycans	gene name	day 14 FC		ECM-affiliated	gene name	Day 7 FC	ECM-affiliated	gene name	Day 14 FC		Secreted factors	gene name	Day 7 FC	Day 14	gene name	Day 14 FC		Regulators	gene name	Day 7 FC	Day 14	gene name	Day 14 FC
Abi3bp	ABI gene family, member 3 (NESH) binding protein	Col8a2	2.01065	Col8a2	2.97314		Tnn	tenascin N	256.018	Col26a1	EMI domain containing 2	152.359		Prg4	proteoglycan 4 (megakaryocyte stimulating factor, articular superficial zone protein)	136.186	Acan	aggrecan	53.3647		Clec5a	C-type lectin domain family 5, member a	27.5308	C1qtnf3	C1q and tumor necrosis factor related protein 3	111.884		S100a8	S100 calcium binding protein A8 (calgranulin A)	195.254	Mdk	midkine	28.9929		Serpina12	serine (or cysteine) peptidase inhibitor, clade A (alpha-1 antiproteinase, antitrypsin), member 12	-40.3216	Serpinb11	serine (or cysteine) peptidase inhibitor, clade B (ovalbumin), member 11	-7.2546
Adipoq	adiponectin, C1Q and collagen domain containing	Col8a1	2.58387	Col8a1	11.8448		Tnc	tenascin C	177.879	Fbn2	fibrillin 2	92.0719		Srgn	serglycin	16.7988	Hapln3	hyaluronan and proteoglycan link protein 3	20.0636		C1qtnf3	C1q and tumor necrosis factor related protein 3	26.3147	Fcna	ficolin A	15.9724		Wnt2	wingless-related MMTV integration site 2	32.9904	Fgf23	fibroblast growth factor 23	24.5861		Plg	plasminogen	-18.9694	Serpina5	serine (or cysteine) peptidase inhibitor, clade A, member 5	-5.33594
Aebp1	AE binding protein 1	Col7a1	4.09108	Col7a1	2.92618		Cthrc1	collagen triple helix repeat containing 1	67.1379	Cthrc1	collagen triple helix repeat containing 1	39.9805		Hapln3	hyaluronan and proteoglycan link protein 3	14.3407	Vcan	versican	9.43142		Fcna	ficolin A	23.5301	Gpc3	glypican 3	14.8093		Rptn	repetin	20.5217	Ptn	pleiotrophin	21.486		Kng1	kininogen 1	-18.0972	Serpina12	serine (or cysteine) peptidase inhibitor, clade A (alpha-1 antiproteinase, antitrypsin), member 12	-4.58497
Agrn	agrin	Col6a6	2.29801	Col6a6	14.1501		Lama1	laminin, alpha 1	41.3316	Tnc	tenascin C	32.7711		Vcan	versican	13.2199	Bgn	biglycan	8.64144		C1qb	complement component 1, q subcomponent, beta polypeptide	14.0285	Clec5a	C-type lectin domain family 5, member a	5.48761		Ptn	pleiotrophin	19.061	Tchh	trichohyalin	13.2535		Serpina5	serine (or cysteine) peptidase inhibitor, clade A, member 5	-14.6445	Kng1	kininogen 1	-3.48897
Ambn	ameloblastin	Col6a3	3.94764	Col6a3	4.2029		Col26a1	EMI domain containing 2	36.8954	Tnn	tenascin N	31.2729		Acan	aggrecan	11.9475	Prg4	proteoglycan 4 (megakaryocyte stimulating factor, articular superficial zone protein)	7.97654		Fcnb	ficolin B	11.7998	Plxnc1	plexin C1	5.09125		Mdk	midkine	17.6197	Sfrp2	secreted frizzled-related protein 2	9.74745		Serpinb11	serine (or cysteine) peptidase inhibitor, clade B (ovalbumin), member 11	-14.5289	Ctsw	cathepsin W	-3.4563
Amelx	amelogenin X chromosome	Col6a2	4.42604	Col6a2	4.69856		Fbn2	fibrillin 2	28.2026	Spp1	secreted phosphoprotein 1	23.6969		Bgn	biglycan	11.5771	Lum	lumican	6.57931		C1qa	complement component 1, q subcomponent, alpha polypeptide	11.6061	Clec4a4	C-type lectin domain family 4, member a4	4.74728		Nrg1	neuregulin 1	15.6588	Megf6	multiple EGF-like-domains 6	7.87769		Serpinb7	serine (or cysteine) peptidase inhibitor, clade B, member 7	-13.1522	Serpinb7	serine (or cysteine) peptidase inhibitor, clade B, member 7	-3.08096
AW551984	expressed sequence AW551984	Col6a1	5.20392	Col6a1	5.45387		Fn1	fibronectin 1	23.9623	Nov	nephroblastoma overexpressed gene	17.6138		Spock3	sparc/osteonectin, cwcv and kazal-like domains proteoglycan 3	9.4885	Aspn	asporin	4.56758		C1qc	complement component 1, q subcomponent, C chain	11.0076	C1qtnf6	C1q and tumor necrosis factor related protein 6	4.38542		Wnt2b	wingless related MMTV integration site 2b	14.9629	Scube2	signal peptide, CUB domain, EGF-like 2	7.8538		Ctsw	cathepsin W	-11.8538	Cst6	cystatin E/M	-2.87341
Bglap2	bone gamma-carboxyglutamate protein 2	Col5a3	6.70184	Col5a3	3.54137		Spp1	secreted phosphoprotein 1	20.4999	Fn1	fibronectin 1	12.7355		Hspg2	perlecan (heparan sulfate proteoglycan 2)	2.99622	Spock3	sparc/osteonectin, cwcv and kazal-like domains proteoglycan 3	3.56132		Clec4a4	C-type lectin domain family 4, member a4	9.91514	C1qb	complement component 1, q subcomponent, beta polypeptide	4.2784		Fgf23	fibroblast growth factor 23	12.9915	Wnt2	wingless-related MMTV integration site 2	6.73432		Kazald1	Kazal-type serine peptidase inhibitor domain 1	-7.84175	Mmp28	matrix metallopeptidase 28 (epilysin)	-2.82726
Bglap3	bone gamma-carboxyglutamate protein, related sequence 1	Col5a2	5.30423	Col5a2	4.8157		Thbs4	thrombospondin 4	16.0695	Pxdn	peroxidasin homolog (Drosophila)	10.8408		Fmod	fibromodulin	2.98253	Ogn	osteoglycin	3.55575		Plxnc1	plexin C1	6.36447	Frem1	Fras1 related extracellular matrix protein 1	4.24995		Sfrp2	secreted frizzled-related protein 2	12.9269	Fstl1	follistatin-like 1	6.65465		Timp3	tissue inhibitor of metalloproteinase 3	-6.29429	Plg	plasminogen	-2.72892
Bmper	BMP-binding endothelial regulator	Col5a1	4.91626	Col5a1	4.48517		Pxdn	peroxidasin homolog (Drosophila)	15.2411	Thbs4	thrombospondin 4	8.95776		Lum	lumican	2.10892	Fmod	fibromodulin	3.25658		Clec4b2	C-type lectin domain family 4, member b2	5.3275	Clec4a1	C-type lectin domain family 4, member a1	4.0189		Fstl1	follistatin-like 1	9.20339	Fgf16	fibroblast growth factor 16	6.36516		Adamts20	a disintegrin-like and metallopeptidase (reprolysin type) with thrombospondin type 1 motif, 20	-5.24097	Adamtsl5	ADAMTS-like 5	-2.50803
Bsph1	binder of sperm protein homolog 1	Col4a6	-8.48391	Col4a6	-2.27638		Nov	nephroblastoma overexpressed gene	13.6224	Matn4	matrilin 4	7.87458		Dcn	decorin	1.88465	Hspg2	perlecan (heparan sulfate proteoglycan 2)	2.44593		Clec3b	C-type lectin domain family 3, member b	5.10031	C1qc	complement component 1, q subcomponent, C chain	3.90134		Angptl4	angiopoietin-like 4	6.3771	Crnn	cornulin	5.99643		Timp4	tissue inhibitor of metalloproteinase 4	-5.02362	Adam11	a disintegrin and metallopeptidase domain 11	-2.36152
Bsph2	RIKEN cDNA 9230107M04 gene	Col4a4	-11.7303	Col4a4	-1.66019		Emilin1	elastin microfibril interfacer 1	13.0691	Ibsp	integrin binding sialoprotein	7.05708		Aspn	asporin	1.51656	Dcn	decorin	1.91078		Gpc3	glypican 3	4.94415	Clec4b2	C-type lectin domain family 4, member b2	3.63396		Sfrp4	secreted frizzled-related protein 4	6.25665	Shh	sonic hedgehog	5.68176		Adam11	a disintegrin and metallopeptidase domain 11	-4.47774	Pcsk6	proprotein convertase subtilisin/kexin type 6	-2.33137
Cdcp2	CUB domain containing protein 2	Col4a3	-15.7111	Col4a3	-2.03972		Wisp1	WNT1 inducible signaling pathway protein 1	10.7791	Emilin1	elastin microfibril interfacer 1	7.00425		Ogn	osteoglycin	-3.52376	Srgn	serglycin	1.84293		Clec4a1	C-type lectin domain family 4, member a1	4.33117	C1qa	complement component 1, q subcomponent, alpha polypeptide	3.46986		Ccl2	chemokine (C-C motif) ligand 2	5.23151	Wnt2b	wingless related MMTV integration site 2b	5.45743		Adamtsl5	ADAMTS-like 5	-4.44578	Timp3	tissue inhibitor of metalloproteinase 3	-2.27473
Cilp	cartilage intermediate layer protein, nucleotide pyrophosphohydrolase	Col4a2	1.76898	Col4a2	1.30927		Srpx2	sushi-repeat-containing protein, X-linked 2	7.61526	Wisp1	WNT1 inducible signaling pathway protein 1	6.14683		Spock2	sparc/osteonectin, cwcv and kazal-like domains proteoglycan 2	-4.14433	Spock2	sparc/osteonectin, cwcv and kazal-like domains proteoglycan 2	-1.54959		C1qtnf6	C1q and tumor necrosis factor related protein 6	4.24872	Fcnb	ficolin B	3.09592		Scube2	signal peptide, CUB domain, EGF-like 2	4.88488	Megf10	multiple EGF-like-domains 10	5.11154		Cst6	cystatin E/M	-3.91174	Tgm4	transglutaminase 4 (prostate)	-2.04334
Cilp2	cartilage intermediate layer protein 2	Col4a1	1.6243	Col4a1	1.39146		Fbln2	fibulin 2	7.27943	AW551984	expressed sequence AW551984	6.02623		Hapln1	hyaluronan and proteoglycan link protein 1	-67.857	Hapln1	hyaluronan and proteoglycan link protein 1	-3.7797		C1qtnf1	C1q and tumor necrosis factor related protein 1	4.19706	C1qtnf2	C1q and tumor necrosis factor related protein 2	2.99645		S100a4	S100 calcium binding protein A4	4.30567	Igf2	insulin-like growth factor 2	5.01838		Tgm4	transglutaminase 4 (prostate)	-3.47243	St14	suppression of tumorigenicity 14 (colon carcinoma)	-1.9264
Coch	coagulation factor C homolog (Limulus polyphemus)	Col3a1	1.90958	Col3a1	2.96501		Fbn1	fibrillin 1	6.601	Slamf6	SLAM family member 6	5.82947		Podn	podocan	-1.53759	Kera	keratocan	45.4964		Clec4a2	C-type lectin domain family 4, member a2	4.15625	Gpc6	glypican 6	2.73902		Fgf16	fibroblast growth factor 16	4.26054	Tgfb3	transforming growth factor, beta 3	4.35457		St14	suppression of tumorigenicity 14 (colon carcinoma)	-2.93767	Kazald1	Kazal-type serine peptidase inhibitor domain 1	-1.91772
Colq	collagen-like tail subunit (single strand of homotrimer) of asymmetric acetylcholinesterase	Col27a1	7.60558	Col27a1	3.70236		Efemp2	epidermal growth factor-containing fibulin-like extracellular matrix protein 2	5.97015	Lama1	laminin, alpha 1	5.38539		Chadl	chondroadherin-like	-2.08724	Omd	osteomodulin	2.72119		Gpc6	glypican 6	3.95863	Plxdc1	plexin domain containing 1	2.32399		Vegfc	vascular endothelial growth factor C	3.30192	Nrg1	neuregulin 1	3.82579		Adam22	a disintegrin and metallopeptidase domain 22	-2.44306	Serpinb5	serine (or cysteine) peptidase inhibitor, clade B, member 5	-1.78936
Comp	cartilage oligomeric matrix protein	Col24a1	14.0743	Col24a1	7.00708		Mfap5	microfibrillar associated protein 5	5.20243	Edil3	EGF-like repeats and discoidin I-like domains 3	5.35101									Colec12	collectin sub-family member 12	2.96676	Clec3b	C-type lectin domain family 3, member b	2.28712		Igf2	insulin-like growth factor 2	3.02754	Sfrp4	secreted frizzled-related protein 4	3.68763		Mmp15	matrix metallopeptidase 15	-2.10524	Serpinb8	serine (or cysteine) peptidase inhibitor, clade B, member 8	-1.68374
Creld1	cysteine-rich with EGF-like domains 1	Col23a1	-2.08014	Col23a1	-1.46455		Thbs3	thrombospondin 3	4.25326	Mfap2	microfibrillar-associated protein 2	5.1091									Clec4a3	C-type lectin domain family 4, member a3	2.24919	Clec4a2	C-type lectin domain family 4, member a2	2.28639		Tgfb1	transforming growth factor, beta 1	2.98494	Pdgfd	platelet-derived growth factor, D polypeptide	3.43988		Mmp17	matrix metallopeptidase 17	-1.99687	Timp4	tissue inhibitor of metalloproteinase 4	-1.63355
Creld2	cysteine-rich with EGF-like domains 2	Col19a1	2.65193	Col19a1	10.0726		Mfap2	microfibrillar-associated protein 2	4.1652	Postn	periostin, osteoblast specific factor	5.02402									Emcn	endomucin	2.24342	Colec12	collectin sub-family member 12	2.2169		S100a6	S100 calcium binding protein A6 (calcyclin)	2.66198	Angptl1	angiopoietin-like 1	3.39155		Adamts18	a disintegrin-like and metallopeptidase (reprolysin type) with thrombospondin type 1 motif, 18	-1.97336	Tgm1	transglutaminase 1, K polypeptide	-1.55574
Crim1	cysteine rich transmembrane BMP regulator 1 (chordin like)	Col17a1	-2.27269	Col17a1	-2.16196		AW551984	expressed sequence AW551984	4.11591	Fbn1	fibrillin 1	4.99807									C1qtnf5	C1q and tumor necrosis factor related protein 5	2.01121	Clec4a3	C-type lectin domain family 4, member a3	2.10425		Tgfb3	transforming growth factor, beta 3	2.64545	Wnt9a	wingless-type MMTV integration site 9A	3.08769		Serpinb8	serine (or cysteine) peptidase inhibitor, clade B, member 8	-1.71553	Mmp15	matrix metallopeptidase 15	-1.48157
Crispld1	cysteine-rich secretory protein LCCL domain containing 1	Col12a1	14.9776	Col12a1	4.09542		Pcolce	procollagen C-endopeptidase enhancer protein	3.81246	Thbs2	thrombospondin 2	4.74723									Lman1	lectin, mannose-binding, 1	2.01112	Lman1	lectin, mannose-binding, 1	2.09434		Pdgfc	platelet-derived growth factor, C polypeptide	2.28146	Ccl2	chemokine (C-C motif) ligand 2	2.99801		Serpinb5	serine (or cysteine) peptidase inhibitor, clade B, member 5	-1.60314	Fam20b	family with sequence similarity 20, member b	-1.48067
Crispld2	cysteine-rich secretory protein LCCL domain containing 2	Col11a2	-14.5951	Col11a2	-1.71653		Tsku	tsukushin	3.77592	Srpx2	sushi-repeat-containing protein, X-linked 2	4.6763									Lgals3	lectin, galactose binding, soluble 3	1.91285	C1qtnf1	C1q and tumor necrosis factor related protein 1	2.07522		Hgf	hepatocyte growth factor	2.26793	S100a8	S100 calcium binding protein A8 (calgranulin A)	2.4519		Adam33	a disintegrin and metallopeptidase domain 33	-1.57655	Ogfod1	2-oxoglutarate and iron-dependent oxygenase domain containing 1	-1.30661
Ctgf	connective tissue growth factor	Col11a1	1.99485	Col11a1	4.77038		Spon1	spondin 1, (f-spondin) extracellular matrix protein	3.61295	Dpt	dermatopontin	4.43671									Lgals8	lectin, galactose binding, soluble 8	1.90995	C1qtnf5	C1q and tumor necrosis factor related protein 5	2.06167		Megf10	multiple EGF-like-domains 10	2.19851	Figf	c-fos induced growth factor	2.4318		Mmp28	matrix metallopeptidase 28 (epilysin)	-1.5607	Ctsa	cathepsin A	1.40383
Cthrc1	collagen triple helix repeat containing 1	Col6a5	-13.9782	Col25a1	5.16522		Postn	periostin, osteoblast specific factor	3.5656	Sparcl1	SPARC-like 1	4.27003									Plxnd1	plexin D1	1.89348	Emcn	endomucin	1.96607		Wnt9a	wingless-type MMTV integration site 9A	1.99916	Hhip	Hedgehog-interacting protein	2.37307		Ogfod1	2-oxoglutarate and iron-dependent oxygenase domain containing 1	-1.53653	Adam9	a disintegrin and metallopeptidase domain 9 (meltrin gamma)	1.4459
Cyr61	cysteine rich protein 61	Col4a5	-1.59211	Col1a2	2.25402		Lamb1	laminin B1 subunit 1	3.5389	Mfap5	microfibrillar associated protein 5	4.03533									Anxa6	annexin A6	1.83822	Plxna3	plexin A3	1.9321		Angptl1	angiopoietin-like 1	1.97755	Angptl4	angiopoietin-like 4	2.28065		Pcsk6	proprotein convertase subtilisin/kexin type 6	-1.47872	Adam33	a disintegrin and metallopeptidase domain 33	1.45156
Ddx26b	DEAD/H (Asp-Glu-Ala-Asp/His) box polypeptide 26B	Col28a1	-6.3835	Col1a1	2.05226		Edil3	EGF-like repeats and discoidin I-like domains 3	3.42064	Fbln5	fibulin 5	3.90265									Anxa4	annexin A4	1.79953	Sema6c	sema domain, transmembrane domain (TM), and cytoplasmic domain, (semaphorin) 6C	1.85092		Tnf	tumor necrosis factor	1.96648	Rptn	repetin	2.26616		Fam20b	family with sequence similarity 20, member b	-1.45366	Serpinb9	serine (or cysteine) peptidase inhibitor, clade B, member 9	1.45214
Dmbt1	deleted in malignant brain tumors 1	Col20a1	-5.26601	Col16a1	2.31135		Slamf6	SLAM family member 6	3.40021	Fbln2	fibulin 2	3.64066									Sema6c	sema domain, transmembrane domain (TM), and cytoplasmic domain, (semaphorin) 6C	1.70782	Sdc2	syndecan 2	1.63905		Wnt10b	wingless related MMTV integration site 10b	1.92107	S100a1	S100 calcium binding protein A1	2.13944		Loxl4	lysyl oxidase-like 4	1.34719	Ctsd	cathepsin D	1.51545
Dmp1	dentin matrix protein 1	Col18a1	2.54543	Col14a1	2.41099		Lama4	laminin, alpha 4	3.24819	Efemp2	epidermal growth factor-containing fibulin-like extracellular matrix protein 2	3.47808									Anxa5	annexin A5	1.55067	Lgals3	lectin, galactose binding, soluble 3	1.59936		Angpt2	angiopoietin 2	1.88805	Hgf	hepatocyte growth factor	2.06716		Cd109	CD109 antigen	1.38231	Adamts12	a disintegrin-like and metallopeptidase (reprolysin type) with thrombospondin type 1 motif, 12	1.5446
Dpt	dermatopontin	Col15a1	-1.75769				Dpt	dermatopontin	3.21676	Thbs3	thrombospondin 3	3.21643									Plxna3	plexin A3	1.52742	Anxa4	annexin A4	1.57811		Ccbe1	collagen and calcium binding EGF domains 1	1.70959	Angpt2	angiopoietin 2	2.03462		Pappa	pregnancy-associated plasma protein A	1.47671	Cd109	CD109 antigen	1.56654
Dspp	dentin sialophosphoprotein						Emilin2	elastin microfibril interfacer 2	3.12242	Igfbp6	insulin-like growth factor binding protein 6	3.07464									Sdc3	syndecan 3	1.44117	Sdc3	syndecan 3	1.57294		Megf6	multiple EGF-like-domains 6	1.62374	Vegfc	vascular endothelial growth factor C	2.00585		Ctsa	cathepsin A	1.50407	P4ha2	procollagen-proline, 2-oxoglutarate 4-dioxygenase (proline 4-hydroxylase), alpha II polypeptide	1.58043
Ecm1	extracellular matrix protein 1						Kcp	kielin/chordin-like protein	3.12167	Kcp	kielin/chordin-like protein	3.01769									Sdc2	syndecan 2	1.37823	Anxa5	annexin A5	1.56471		Wnt5a	wingless-related MMTV integration site 5A	1.55281	Angptl2	angiopoietin-like 2	1.92644		Ctsd	cathepsin D	1.69906	Mmp17	matrix metallopeptidase 17	1.5889
Ecm2	extracellular matrix protein 2, female organ and adipocyte specific						Matn4	matrilin 4	3.06484	Nid1	nidogen 1	3.01043									Sdc1	syndecan 1	1.29508	Anxa6	annexin A6	1.50554		Pdgfd	platelet-derived growth factor, D polypeptide	1.52801	Wif1	Wnt inhibitory factor 1	1.89966		Serpinb9	serine (or cysteine) peptidase inhibitor, clade B, member 9	1.72738	Ctsh	cathepsin H	1.62033
Edil3	EGF-like repeats and discoidin I-like domains 3						Tgfbi	transforming growth factor, beta induced	3.03302	Nid2	nidogen 2	3.00784									Sema4b	sema domain, immunoglobulin domain (Ig), transmembrane domain (TM) and short cytoplasmic domain, (semaphorin) 4B	-1.64009	Plxnd1	plexin D1	1.49178		Angptl2	angiopoietin-like 2	1.51	Wnt10b	wingless related MMTV integration site 10b	1.74481		Adamts12	a disintegrin-like and metallopeptidase (reprolysin type) with thrombospondin type 1 motif, 12	1.84941	Loxl4	lysyl oxidase-like 4	1.68697
Efemp1	epidermal growth factor-containing fibulin-like extracellular matrix protein 1						Igfbp4	insulin-like growth factor binding protein 4	3.02465	Spon1	spondin 1, (f-spondin) extracellular matrix protein	2.98763									Clec2g	C-type lectin domain family 2, member g	-1.80209	Lgals8	lectin, galactose binding, soluble 8	1.28433		Sfrp1	secreted frizzled-related protein 1	1.41387	Angpt1	angiopoietin 1	1.7244		Adamts2	a disintegrin-like and metallopeptidase (reprolysin type) with thrombospondin type 1 motif, 2	1.84972	Plod3	procollagen-lysine, 2-oxoglutarate 5-dioxygenase 3	1.77969
Efemp2	epidermal growth factor-containing fibulin-like extracellular matrix protein 2						Crispld2	cysteine-rich secretory protein LCCL domain containing 2	2.85729	Emilin2	elastin microfibril interfacer 2	2.9453									Cspg4	chondroitin sulfate proteoglycan 4	-1.93196	Sema5a	sema domain, seven thrombospondin repeats (type 1 and type 1-like), transmembrane domain (TM) and short cytoplasmic domain, (semaphorin) 5A	-1.43861		Egfl7	EGF-like domain 7	-1.35863	Tgfb1	transforming growth factor, beta 1	1.69278		Ctsl	cathepsin L	1.87229	Adamts2	a disintegrin-like and metallopeptidase (reprolysin type) with thrombospondin type 1 motif, 2	1.82292
Egfem1	RIKEN cDNA 6130401L20 gene						Nid1	nidogen 1	2.79763	Lamb1	laminin B1 subunit 1	2.83392									Clec2h	C-type lectin domain family 2, member h	-2.02908	Clec2g	C-type lectin domain family 2, member g	-1.54527		S100a1	S100 calcium binding protein A1	-1.59523	Pdgfc	platelet-derived growth factor, C polypeptide	1.63596		A2m	alpha-2-macroglobulin	2.02104	Ctsb	cathepsin B	1.82452
Egflam	EGF-like, fibronectin type III and laminin G domains						Igfbp6	insulin-like growth factor binding protein 6	2.71606	Pcolce	procollagen C-endopeptidase enhancer protein	2.71738									Clec2i	C-type lectin domain family 2, member i	-2.18826	Clec2h	C-type lectin domain family 2, member h	-1.62461		Fam132a	family with sequence similarity 132, member A	-1.61592	Ccbe1	collagen and calcium binding EGF domains 1	1.61705		Adam9	a disintegrin and metallopeptidase domain 9 (meltrin gamma)	2.09107	Plau	plasminogen activator, urokinase	1.83078
Eln	elastin						Thbs2	thrombospondin 2	2.66197	Ltbp2	latent transforming growth factor beta binding protein 2	2.66279									Lgalsl	RIKEN cDNA 1110067D22 gene	-2.21066	Anxa9	annexin A9	-1.64749		Fgf18	fibroblast growth factor 18	-1.63587	Sfrp1	secreted frizzled-related protein 1	1.56622		Adamtsl1	ADAMTS-like 1	2.11349	Ctsl	cathepsin L	1.8341
Emid1	EMI domain containing 1						Ecm1	extracellular matrix protein 1	2.4542	Rspo1	R-spondin homolog (Xenopus laevis)	2.56019									Anxa9	annexin A9	-2.59362	Clec2i	C-type lectin domain family 2, member i	-1.65146		Il1f5	interleukin 1 family, member 5 (delta)	-1.67769	S100a6	S100 calcium binding protein A6 (calcyclin)	1.52977		Serpinf1	serine (or cysteine) peptidase inhibitor, clade F, member 1	2.13929	Ctsc	cathepsin C	1.84043
Emilin1	elastin microfibril interfacer 1						Nid2	nidogen 2	2.42498	Ntn1	netrin 1	2.42036									Anxa8	annexin A8	-2.83875	Cspg4	chondroitin sulfate proteoglycan 4	-1.67848		Angpt1	angiopoietin 1	-1.7686	Bmp6	bone morphogenetic protein 6	1.51573		Adamts9	a disintegrin-like and metallopeptidase (reprolysin type) with thrombospondin type 1 motif, 9	2.18165	Serpinf1	serine (or cysteine) peptidase inhibitor, clade F, member 1	1.87941
Emilin2	elastin microfibril interfacer 2						Ltbp1	latent transforming growth factor beta binding protein 1	2.35557	Crispld2	cysteine-rich secretory protein LCCL domain containing 2	2.36698									C1qtnf2	C1q and tumor necrosis factor related protein 2	-3.10156	Sema4b	sema domain, immunoglobulin domain (Ig), transmembrane domain (TM) and short cytoplasmic domain, (semaphorin) 4B	-1.71017		Wnt10a	wingless related MMTV integration site 10a	-1.83131	Wnt5a	wingless-related MMTV integration site 5A	1.46852		Timp2	tissue inhibitor of metalloproteinase 2	2.27988	Htra3	HtrA serine peptidase 3	1.91238
Emilin3	elastin microfibril interfacer 3						Fbln5	fibulin 5	2.19232	Ndnf	RIKEN cDNA A930038C07 gene	2.31606									Sema3d	sema domain, immunoglobulin domain (Ig), short basic domain, secreted, (semaphorin) 3D	-3.22701	Plxnb1	plexin B1	-1.82549		Il7	interleukin 7	-1.83828	Ism1	isthmin 1 homolog (zebrafish)	-1.34694		Htra1	HtrA serine peptidase 1	2.38291	Adamts15	a disintegrin-like and metallopeptidase (reprolysin type) with thrombospondin type 1 motif, 15	1.9532
Fbln1	fibulin 1						Aebp1	AE binding protein 1	2.13382	Igfbp4	insulin-like growth factor binding protein 4	2.25929									Plxdc1	plexin domain containing 1	-3.3898	Sdc1	syndecan 1	-1.94464		Megf9	multiple EGF-like-domains 9	-1.85201	Ccl24	chemokine (C-C motif) ligand 24	-1.51262		Plau	plasminogen activator, urokinase	2.43457	P4ha1	procollagen-proline, 2-oxoglutarate 4-dioxygenase (proline 4-hydroxylase), alpha 1 polypeptide	2.05441
Fbln2	fibulin 2						Lamc1	laminin, gamma 1	1.95527	Lama4	laminin, alpha 4	2.25795									Plxnb1	plexin B1	-3.73792	Lgalsl	RIKEN cDNA 1110067D22 gene	-1.94938		Il34	interleukin 34	-1.91597	Il1f5	interleukin 1 family, member 5 (delta)	-1.55516		Serpinb3a	serine (or cysteine) peptidase inhibitor, clade B (ovalbumin), member 3A	2.49517	Serping1	serine (or cysteine) peptidase inhibitor, clade G, member 1	2.05657
Fbln5	fibulin 5						Lama3	laminin, alpha 3	1.93669	Aebp1	AE binding protein 1	2.11719									Sema5a	sema domain, seven thrombospondin repeats (type 1 and type 1-like), transmembrane domain (TM) and short cytoplasmic domain, (semaphorin) 5A	-3.80983	Parm1	prostate androgen-regulated mucin-like protein 1	-2.03621		Bmp6	bone morphogenetic protein 6	-1.95722	Wnt4	wingless-related MMTV integration site 4	-1.5842		Tgm1	transglutaminase 1, K polypeptide	2.54439	Timp1	tissue inhibitor of metalloproteinase 1	2.06518
Fbln7	fibulin 7						Sparc	secreted acidic cysteine rich glycoprotein	1.93288	Lamc1	laminin, gamma 1	1.96628									Sema3e	sema domain, immunoglobulin domain (Ig), short basic domain, secreted, (semaphorin) 3E	-4.71009	Sema3e	sema domain, immunoglobulin domain (Ig), short basic domain, secreted, (semaphorin) 3E	-2.11022		Bmp2	bone morphogenetic protein 2	-2.15192	S100a4	S100 calcium binding protein A4	-1.59358		Loxl2	lysyl oxidase-like 2	2.68671	Plod1	procollagen-lysine, 2-oxoglutarate 5-dioxygenase 1	2.07915
Fbn1	fibrillin 1						Ltbp2	latent transforming growth factor beta binding protein 2	1.68876	Cilp	cartilage intermediate layer protein, nucleotide pyrophosphohydrolase	1.93252									Parm1	prostate androgen-regulated mucin-like protein 1	-5.32419	Sema3d	sema domain, immunoglobulin domain (Ig), short basic domain, secreted, (semaphorin) 3D	-2.33737		Fgfbp1	fibroblast growth factor binding protein 1	-2.17841	Btc	betacellulin, epidermal growth factor family member	-1.59768		Serping1	serine (or cysteine) peptidase inhibitor, clade G, member 1	2.77252	Loxl2	lysyl oxidase-like 2	2.18689
Fbn2	fibrillin 2						Mfap3	microfibrillar-associated protein 3	1.59251	Matn2	matrilin 2	1.91021									Frem1	Fras1 related extracellular matrix protein 1	-6.67648	Muc15	mucin 15	-3.14451		Figf	c-fos induced growth factor	-2.42368	Bmp2	bone morphogenetic protein 2	-1.6081		Ctsh	cathepsin H	2.92171	Serpinc1	serine (or cysteine) peptidase inhibitor, clade C (antithrombin), member 1	2.1903
Fga	fibrinogen alpha chain						Igfbp3	insulin-like growth factor binding protein 3	1.54497	Sparc	secreted acidic cysteine rich glycoprotein	1.89709									Muc15	mucin 15	-7.08076	Anxa8	annexin A8	-3.26261		Wnt3a	wingless-related MMTV integration site 3A	-2.49508	Egfl7	EGF-like domain 7	-1.61985		Adamts15	a disintegrin-like and metallopeptidase (reprolysin type) with thrombospondin type 1 motif, 15	2.97217	Timp2	tissue inhibitor of metalloproteinase 2	2.32752
Fgb	fibrinogen beta chain						Creld1	cysteine-rich with EGF-like domains 1	1.45684	Mgp	matrix Gla protein	1.86963									Grem1	gremlin 1	-9.11199	Grem1	gremlin 1	-3.94648		Wnt4	wingless-related MMTV integration site 4	-2.58766	Tnf	tumor necrosis factor	-1.64777		Sulf2	sulfatase 2	3.2977	Loxl3	lysyl oxidase-like 3	2.39144
Fgg	fibrinogen gamma chain						Lamb3	laminin, beta 3	1.44107	Ltbp1	latent transforming growth factor beta binding protein 1	1.86744									Lgals12	lectin, galactose binding, soluble 12	-76.4283	Lgals12	lectin, galactose binding, soluble 12	-4.96686		Btc	betacellulin, epidermal growth factor family member	-2.69376	Megf9	multiple EGF-like-domains 9	-1.66784		Plod3	procollagen-lysine, 2-oxoglutarate 5-dioxygenase 3	3.35494	Mmp3	matrix metallopeptidase 3	2.45959
Fgl1	fibrinogen-like protein 1						Mfge8	milk fat globule-EGF factor 8 protein	1.41486	Bmper	BMP-binding endothelial regulator	1.84634									Clec4d	C-type lectin domain family 4, member d	425.424	Gpc4	glypican 4	1.51004		Hhip	Hedgehog-interacting protein	-2.71989	Fgf1	fibroblast growth factor 1	-1.77613		Mmp14	matrix metallopeptidase 14 (membrane-inserted)	3.57853	Serpinb3a	serine (or cysteine) peptidase inhibitor, clade B (ovalbumin), member 3A	2.51306
Fgl2	fibrinogen-like protein 2						Vwa2	von Willebrand factor A domain containing 2	-1.31966	Mmrn1	multimerin 1	1.68843									Clec4n	C-type lectin domain family 4, member n	17.1624	Sema3g	sema domain, immunoglobulin domain (Ig), short basic domain, secreted, (semaphorin) 3G	1.4923		Wnt7b	wingless-related MMTV integration site 7B	-2.89172	Flg2	filaggrin family member 2	-1.88559		Bmp1	bone morphogenetic protein 1	3.59788	Bmp1	bone morphogenetic protein 1	2.53011
Fn1	fibronectin 1						Sparcl1	SPARC-like 1	-1.42075	Creld1	cysteine-rich with EGF-like domains 1	1.6301									Clec10a	C-type lectin domain family 10, member A	15.36	Gpc1	glypican 1	1.28183		Chrdl1	chordin-like 1	-2.95863	Bmp3	bone morphogenetic protein 3	-1.93236		Mmp2	matrix metallopeptidase 2	3.69158	Adamts3	a disintegrin-like and metallopeptidase (reprolysin type) with thrombospondin type 1 motif, 3	2.56221
Fndc1	fibronectin type III domain containing 1						Mgp	matrix Gla protein	-1.5389	Tsku	tsukushin	1.60314									Clec4e	C-type lectin domain family 4, member e	12.3747	Sema4a	sema domain, immunoglobulin domain (Ig), transmembrane domain (TM) and short cytoplasmic domain, (semaphorin) 4A	-1.33854		Bmp3	bone morphogenetic protein 3	-3.36945	Fgf18	fibroblast growth factor 18	-1.97452		Htra3	HtrA serine peptidase 3	3.81207	Mmp2	matrix metallopeptidase 2	2.57786
Fndc7	fibronectin type III domain containing 7						Ntn4	netrin 4	-1.72868	Ltbp3	latent transforming growth factor beta binding protein 3	1.50678									Cd209a	CD209a antigen	8.95418	Sdc4	syndecan 4	-1.52248		Shh	sonic hedgehog	-3.76623	Ccl19	chemokine (C-C motif) ligand 19	-1.99187		P4ha2	procollagen-proline, 2-oxoglutarate 4-dioxygenase (proline 4-hydroxylase), alpha II polypeptide	3.83696	Adamts6	a disintegrin-like and metallopeptidase (reprolysin type) with thrombospondin type 1 motif, 6	2.66721
Fndc8	fibronectin type III domain containing 8						Crim1	cysteine rich transmembrane BMP regulator 1 (chordin like)	-1.75543	Mfge8	milk fat globule-EGF factor 8 protein	1.44917									Clec7a	C-type lectin domain family 7, member a	5.52714	Lgals7	lectin, galactose binding, soluble 7	-2.21366		Cx3cl1	chemokine (C-X3-C motif) ligand 1	-3.79588	Fam132a	family with sequence similarity 132, member A	-1.99611		Plod1	procollagen-lysine, 2-oxoglutarate 5-dioxygenase 1	3.91314	Adam19	a disintegrin and metallopeptidase domain 19 (meltrin beta)	2.84623
Fras1	Fraser syndrome 1 homolog (human)						Ltbp3	latent transforming growth factor beta binding protein 3	-1.92124	Igfbp3	insulin-like growth factor binding protein 3	1.43349									Cd209d	CD209d antigen	3.72014	Clec4g	C-type lectin domain family 4, member g	-2.78082		Il12b	interleukin 12b	-3.85834	Wnt3	wingless-related MMTV integration site 3	-2.02418		Ctsb	cathepsin B	4.04203	Adamtsl1	ADAMTS-like 1	2.92993
Gas6	growth arrest specific 6						Ntn1	netrin 1	-1.99434	Ecm1	extracellular matrix protein 1	1.43166									Sema6b	sema domain, transmembrane domain (TM), and cytoplasmic domain, (semaphorin) 6B	3.64953					Ism1	isthmin 1 homolog (zebrafish)	-3.88498	Wnt10a	wingless related MMTV integration site 10a	-2.06168		Serpinh1	serine (or cysteine) peptidase inhibitor, clade H, member 1	4.30281	Adamts9	a disintegrin-like and metallopeptidase (reprolysin type) with thrombospondin type 1 motif, 9	2.94482
Gldn	gliomedin						Matn2	matrilin 2	-2.28127	Smoc2	SPARC related modular calcium binding 2	1.41368									Lgals9	lectin, galactose binding, soluble 9	3.17944					Ccl22	chemokine (C-C motif) ligand 22	-4.63321	Il18	interleukin 18	-2.0797		Ctsc	cathepsin C	4.69013	Adamts20	a disintegrin-like and metallopeptidase (reprolysin type) with thrombospondin type 1 motif, 20	2.95381
Hmcn1	hemicentin 1						Lgi4	leucine-rich repeat LGI family, member 4	-2.38481	Mfap3	microfibrillar-associated protein 3	1.34348									Anxa1	annexin A1	3.0352					Nrtn	neurturin	-4.64723	Chrdl1	chordin-like 1	-2.15542		Adam23	a disintegrin and metallopeptidase domain 23	4.79881	Adam22	a disintegrin and metallopeptidase domain 22	2.96157
Hmcn2	hemicentin 2						Ibsp	integrin binding sialoprotein	-2.52264	Ntn4	netrin 4	-1.31374									Anxa3	annexin A3	2.87832					Fgf1	fibroblast growth factor 1	-4.81564	Nrtn	neurturin	-2.22768		Mmp23	matrix metallopeptidase 23	4.98229	Sulf1	sulfatase 1	3.07142
Ibsp	integrin binding sialoprotein						Bmper	BMP-binding endothelial regulator	-2.75945	Vwa2	von Willebrand factor A domain containing 2	-1.46392									Sema4g	sema domain, immunoglobulin domain (Ig), transmembrane domain (TM) and short cytoplasmic domain, (semaphorin) 4G	2.75402					Nrg4	neuregulin 4	-8.0411	Wnt3a	wingless-related MMTV integration site 3A	-2.42621		P4ha1	procollagen-proline, 2-oxoglutarate 4-dioxygenase (proline 4-hydroxylase), alpha 1 polypeptide	5.07709	Pappa	pregnancy-associated plasma protein A	3.13473
Igfals	insulin-like growth factor binding protein, acid labile subunit						Smoc2	SPARC related modular calcium binding 2	-3.75886	Crim1	cysteine rich transmembrane BMP regulator 1 (chordin like)	-1.50526									Clec2e	C-type lectin domain family 2, member e	2.19155					Il18	interleukin 18	-8.38385	Wnt7b	wingless-related MMTV integration site 7B	-2.42926		Mmp19	matrix metallopeptidase 19	5.27209	Serpinh1	serine (or cysteine) peptidase inhibitor, clade H, member 1	3.21666
Igfbp1	insulin-like growth factor binding protein 1						Lgi1	leucine-rich repeat LGI family, member 1	-5.02029	Tgfbi	transforming growth factor, beta induced	-1.6596									Sema4f	sema domain, immunoglobulin domain (Ig), TM domain, and short cytoplasmic domain	2.03505					Ccl24	chemokine (C-C motif) ligand 24	-8.89331	Ccl22	chemokine (C-C motif) ligand 22	-2.60919		Ctsz	cathepsin Z	5.33988	Htra1	HtrA serine peptidase 1	3.38832
Igfbp2	insulin-like growth factor binding protein 2						Cilp	cartilage intermediate layer protein, nucleotide pyrophosphohydrolase	-5.68797	Gldn	gliomedin	-1.86979									Anxa2	annexin A2	1.7079					Wnt3	wingless-related MMTV integration site 3	-10.0426	Mstn	myostatin	-2.78696		Adamts6	a disintegrin-like and metallopeptidase (reprolysin type) with thrombospondin type 1 motif, 6	5.41379	Mmp19	matrix metallopeptidase 19	3.45744
Igfbp3	insulin-like growth factor binding protein 3						Ndnf	RIKEN cDNA A930038C07 gene	-6.04394	Lama3	laminin, alpha 3	-1.93157									Sema7a	sema domain, immunoglobulin domain (Ig), and GPI membrane anchor, (semaphorin) 7A	1.69003					S100b	S100 protein, beta polypeptide, neural	-10.3195	Il34	interleukin 34	-2.79044		Mmp11	matrix metallopeptidase 11	5.4206	Loxl1	lysyl oxidase-like 1	3.53953
Igfbp4	insulin-like growth factor binding protein 4						Rspo1	R-spondin homolog (Xenopus laevis)	-6.23207	Coch	coagulation factor C homolog (Limulus polyphemus)	-1.96595									Sema3c	sema domain, immunoglobulin domain (Ig), short basic domain, secreted, (semaphorin) 3C	1.68936					Ccl27a	chemokine (C-C motif) ligand 27A	-10.3758	Nrg4	neuregulin 4	-2.81913		Loxl1	lysyl oxidase-like 1	5.43196	Mmp14	matrix metallopeptidase 14 (membrane-inserted)	3.68473
Igfbp5	insulin-like growth factor binding protein 5						Smoc1	SPARC related modular calcium binding 1	-6.82156	Ltbp4	latent transforming growth factor beta binding protein 4	-1.9721									Sema5b	sema domain, seven thrombospondin repeats (type 1 and type 1-like), transmembrane domain (TM) and short cytoplasmic domain, (semaphorin) 5B	1.64381					Wif1	Wnt inhibitory factor 1	-12.2262	Fgfbp1	fibroblast growth factor binding protein 1	-2.88277		Adam19	a disintegrin and metallopeptidase domain 19 (meltrin beta)	6.44473	Serpina9	serine (or cysteine) peptidase inhibitor, clade A (alpha-1 antiproteinase, antitrypsin), member 9	3.68673
Igfbp6	insulin-like growth factor binding protein 6						Igfbp2	insulin-like growth factor binding protein 2	-7.15905	Lgi4	leucine-rich repeat LGI family, member 4	-2.07924									Plxna1	plexin A1	1.56951					Sfrp5	secreted frizzled-related sequence protein 5	-13.1214	Cx3cl1	chemokine (C-X3-C motif) ligand 1	-2.92251		Serpinc1	serine (or cysteine) peptidase inhibitor, clade C (antithrombin), member 1	6.9021	Sulf2	sulfatase 2	3.79562
Igfbp7	insulin-like growth factor binding protein 7						Mmrn1	multimerin 1	-8.78501	Lgi1	leucine-rich repeat LGI family, member 1	-2.09272									Sema4c	sema domain, immunoglobulin domain (Ig), transmembrane domain (TM) and short cytoplasmic domain, (semaphorin) 4C	1.3163					Flg2	filaggrin family member 2	-27.0284	S100b	S100 protein, beta polypeptide, neural	-2.99751		Adamts7	a disintegrin-like and metallopeptidase (reprolysin type) with thrombospondin type 1 motif, 7	7.15982	Ctss	cathepsin S	3.95814
Igfbpl1	insulin-like growth factor binding protein-like 1						Ltbp4	latent transforming growth factor beta binding protein 4	-9.56811	Ntng2	netrin G2	-2.23721									Anxa11	annexin A11	1.25675					Tchh	trichohyalin	-39.0488	Il7	interleukin 7	-3.11851		Adamts3	a disintegrin-like and metallopeptidase (reprolysin type) with thrombospondin type 1 motif, 3	7.41872	Ctsz	cathepsin Z	4.22164
Igsf10	immunoglobulin superfamily, member 10						Ntng2	netrin G2	-9.6431	Lamb3	laminin, beta 3	-2.4311									Sema4d	sema domain, immunoglobulin domain (Ig), transmembrane domain (TM) and short cytoplasmic domain, (semaphorin) 4D	-1.35173					Crnn	cornulin	-53.1267	Ccl27a	chemokine (C-C motif) ligand 27A	-3.77163		Mmp12	matrix metallopeptidase 12	7.58503	Ctsk	cathepsin K	4.80614
Kcp	kielin/chordin-like protein						Coch	coagulation factor C homolog (Limulus polyphemus)	-18.9756	Smoc1	SPARC related modular calcium binding 1	-2.49882									Plxdc2	plexin domain containing 2	-1.46133					Ccl19	chemokine (C-C motif) ligand 19	-85.42	Il12b	interleukin 12b	-3.90999		Loxl3	lysyl oxidase-like 3	7.62835	Mmp23	matrix metallopeptidase 23	4.95092
Lama1	laminin, alpha 1						Lrg1	leucine-rich alpha-2-glycoprotein 1	-29.6162	Igfbp2	insulin-like growth factor binding protein 2	-2.57738									Sema6a	sema domain, transmembrane domain (TM), and cytoplasmic domain, (semaphorin) 6A	-1.49089					Lep	leptin	-106.109	Sfrp5	secreted frizzled-related sequence protein 5	-5.00511		Adamts19	a disintegrin-like and metallopeptidase (reprolysin type) with thrombospondin type 1 motif, 19	8.18533	Adam23	a disintegrin and metallopeptidase domain 23	4.9888
Lama2	laminin, alpha 2						Gldn	gliomedin	-38.1926	Lrg1	leucine-rich alpha-2-glycoprotein 1	-4.60121									Clec2d	C-type lectin domain family 2, member d	-1.52664					Mstn	myostatin	-122.124	Lep	leptin	-7.59224		Adamts14	a disintegrin-like and metallopeptidase (reprolysin type) with thrombospondin type 1 motif, 14	8.66802	Plod2	procollagen lysine, 2-oxoglutarate 5-dioxygenase 2	5.01758
Lama3	laminin, alpha 3						Adipoq	adiponectin, C1Q and collagen domain containing	-113.647	Adipoq	adiponectin, C1Q and collagen domain containing	-5.11353									Plxna2	plexin A2	-1.59859					Il24	interleukin 24	296.117	Egfl6	EGF-like-domain, multiple 6	29.6076		Ctsk	cathepsin K	9.05393	Adamts14	a disintegrin-like and metallopeptidase (reprolysin type) with thrombospondin type 1 motif, 14	5.19254
Lama4	laminin, alpha 4						Lamc2	laminin, gamma 2	9.29017	5430419D17Rik	RIKEN cDNA 5430419D17 gene	14.1501									Colec10	collectin sub-family member 10	-1.62539					Ccl3	chemokine (C-C motif) ligand 3	235.611	S100a3	S100 calcium binding protein A3	22.8064		Pamr1	peptidase domain containing associated with muscle regeneration 1	9.50841	Adamts7	a disintegrin-like and metallopeptidase (reprolysin type) with thrombospondin type 1 motif, 7	5.23925
Lama5	laminin, alpha 5						Thbs1	thrombospondin 1	4.73463	Ntn3	netrin 3	9.67067									Sema3b	sema domain, immunoglobulin domain (Ig), short basic domain, secreted, (semaphorin) 3B	-1.72508					Cxcl2	chemokine (C-X-C motif) ligand 2	221.872	Tchhl1	trichohyalin-like 1	14.0939		Ctss	cathepsin S	9.75657	Plat	plasminogen activator, tissue	5.74626
Lamb1	laminin B1 subunit 1						Tnfaip6	tumor necrosis factor alpha induced protein 6	4.55911	Eln	elastin	6.59275									Sema3f	sema domain, immunoglobulin domain (Ig), short basic domain, secreted, (semaphorin) 3F	-1.89055					Csf3	colony stimulating factor 3 (granulocyte)	171.645	Gdf10	growth differentiation factor 10	2.30652		Sulf1	sulfatase 1	9.98148	Pcsk5	proprotein convertase subtilisin/kexin type 5	6.23905
Lamb2	laminin, beta 2						Cyr61	cysteine rich protein 61	3.77841	Hmcn1	hemicentin 1	5.64572									C1qtnf7	C1q and tumor necrosis factor related protein 7	-1.93918					Il1f6	interleukin 1 family, member 6	169.566	Eda	ectodysplasin-A	1.72453		Adam12	a disintegrin and metallopeptidase domain 12 (meltrin alpha)	11.0252	Mmp9	matrix metallopeptidase 9	7.26727
Lamb3	laminin, beta 3						Lgi2	leucine-rich repeat LGI family, member 2	3.1136	Emid1	EMI domain containing 1	4.6212									C1qtnf9	C1q and tumor necrosis factor related protein 9	-2.75612					Il1b	interleukin 1 beta	147.457	Igf1	insulin-like growth factor 1	1.69053		Timp1	tissue inhibitor of metalloproteinase 1	11.2925	Lox	lysyl oxidase	8.92612
Lamc1	laminin, gamma 1						Igfbp5	insulin-like growth factor binding protein 5	2.64584	Igsf10	immunoglobulin superfamily, member 10	3.28127									Sema3a	sema domain, immunoglobulin domain (Ig), short basic domain, secreted, (semaphorin) 3A	-2.78948					Ccl4	chemokine (C-C motif) ligand 4	110.907	S100a14	S100 calcium binding protein A14	-1.59528		Adamdec1	ADAM-like, decysin 1	11.4449	Adamts18	a disintegrin-like and metallopeptidase (reprolysin type) with thrombospondin type 1 motif, 18	9.48943
Lamc2	laminin, gamma 2						Vwa1	von Willebrand factor A domain containing 1	2.43817	Emilin3	elastin microfibril interfacer 3	2.48581									Clec11a	C-type lectin domain family 11, member a	-3.31839					S100a9	S100 calcium binding protein A9 (calgranulin B)	62.2388	Tgfa	transforming growth factor alpha	-1.67637		Pcsk5	proprotein convertase subtilisin/kexin type 5	12.7891	Pamr1	peptidase domain containing associated with muscle regeneration 1	9.80275
Lamc3	laminin gamma 3						Efemp1	epidermal growth factor-containing fibulin-like extracellular matrix protein 1	2.06527	Ecm2	extracellular matrix protein 2, female organ and adipocyte specific	2.41795									Frem2	Fras1 related extracellular matrix protein 2	-19.6097					Cxcl1	chemokine (C-X-C motif) ligand 1	52.301	Megf11	multiple EGF-like-domains 11	-1.70609		Lox	lysyl oxidase	13.9932	Mmp13	matrix metallopeptidase 13	10.4597
Lgi1	leucine-rich repeat LGI family, member 1						Sspo	SCO-spondin	1.97626	Lama2	laminin, alpha 2	2.21681																Tnfsf13b	tumor necrosis factor (ligand) superfamily, member 13b	31.7689	Inhbb	inhibin beta-B	-1.8356		Adamts17	a disintegrin-like and metallopeptidase (reprolysin type) with thrombospondin type 1 motif, 17	19.747	Adamdec1	ADAM-like, decysin 1	10.8839
Lgi2	leucine-rich repeat LGI family, member 2						Creld2	cysteine-rich with EGF-like domains 2	1.82546	Rspo3	R-spondin 3 homolog (Xenopus laevis)	2.01444																Tnfsf9	tumor necrosis factor (ligand) superfamily, member 9	28.9834	Cxcl15	chemokine (C-X-C motif) ligand 15	-1.96475		Plat	plasminogen activator, tissue	20.6226	Adamts19	a disintegrin-like and metallopeptidase (reprolysin type) with thrombospondin type 1 motif, 19	12.8517
Lgi3	leucine-rich repeat LGI family, member 3						Wisp3	WNT1 inducible signaling pathway protein 3	1.79897	Slit2	slit homolog 2 (Drosophila)	1.91457																Cxcl5	chemokine (C-X-C motif) ligand 5	26.712	Ereg	epiregulin	-2.19162		Plod2	procollagen lysine, 2-oxoglutarate 5-dioxygenase 2	22.6439	Adam12	a disintegrin and metallopeptidase domain 12 (meltrin alpha)	15.5023
Lgi4	leucine-rich repeat LGI family, member 4						Ctgf	connective tissue growth factor	1.57214	Svep1	sushi, von Willebrand factor type A, EGF and pentraxin domain containing 1	1.87897																Osm	oncostatin M	24.7741					P4ha3	procollagen-proline, 2-oxoglutarate 4-dioxygenase (proline 4-hydroxylase), alpha polypeptide III	23.8114	P4ha3	procollagen-proline, 2-oxoglutarate 4-dioxygenase (proline 4-hydroxylase), alpha polypeptide III	16.0658
Lrg1	leucine-rich alpha-2-glycoprotein 1						Thsd4	thrombospondin, type I, domain containing 4	1.47502	Vwf	Von Willebrand factor homolog	1.81104																Il1f9	interleukin 1 family, member 9	24.3649					Serpina9	serine (or cysteine) peptidase inhibitor, clade A (alpha-1 antiproteinase, antitrypsin), member 9	26.4364	A2m	alpha-2-macroglobulin	18.3288
Ltbp1	latent transforming growth factor beta binding protein 1						Vwa9	RIKEN cDNA 2010321M09 gene	1.35553	Slit3	slit homolog 3 (Drosophila)	1.70576																Il10	interleukin 10	23.507					Mmp3	matrix metallopeptidase 3	40.7884	Mmp11	matrix metallopeptidase 11	18.9022
Ltbp2	latent transforming growth factor beta binding protein 2						Tinagl1	tubulointerstitial nephritis antigen-like 1	-1.50098	Egflam	EGF-like, fibronectin type III and laminin G domains	1.70543																Il6	interleukin 6	19.7757					Adamts4	a disintegrin-like and metallopeptidase (reprolysin type) with thrombospondin type 1 motif, 4	55.7963	Adamts4	a disintegrin-like and metallopeptidase (reprolysin type) with thrombospondin type 1 motif, 4	22.6718
Ltbp3	latent transforming growth factor beta binding protein 3						Agrn	agrin	-1.518	Igfbp7	insulin-like growth factor binding protein 7	1.66098																Epgn	epithelial mitogen	17.1932					Adamts16	a disintegrin-like and metallopeptidase (reprolysin type) with thrombospondin type 1 motif, 16	93.0489	Adamts16	a disintegrin-like and metallopeptidase (reprolysin type) with thrombospondin type 1 motif, 16	45.914
Ltbp4	latent transforming growth factor beta binding protein 4						Mmrn2	multimerin 2	-1.53995	Srpx	sushi-repeat-containing protein	1.4866																Lif	leukemia inhibitory factor	12.0778					Mmp9	matrix metallopeptidase 9	164.809	Mmp12	matrix metallopeptidase 12	53.8575
Matn1	matrilin 1, cartilage matrix protein						Vwa7	DNA segment, Chr 17, human D6S56E 3	-1.60276	Abi3bp	ABI gene family, member 3 (NESH) binding protein	-1.50916																Hbegf	heparin-binding EGF-like growth factor	9.33231					Mmp13	matrix metallopeptidase 13	539.131	Adamts17	a disintegrin-like and metallopeptidase (reprolysin type) with thrombospondin type 1 motif, 17	57.7599
Matn2	matrilin 2						Ddx26b	DEAD/H (Asp-Glu-Ala-Asp/His) box polypeptide 26B	-1.77917	Pcolce2	procollagen C-endopeptidase enhancer 2	-1.99366																Clcf1	cardiotrophin-like cytokine factor 1	8.95799					Serpinb13	serine (or cysteine) peptidase inhibitor, clade B (ovalbumin), member 13	-11.4664	Egln3	EGL nine homolog 3 (C. elegans)	-3.35634
Matn3	matrilin 3						Spon2	spondin 2, extracellular matrix protein	-1.83715	Igfals	insulin-like growth factor binding protein, acid labile subunit	-2.97864																Il1rn	interleukin 1 receptor antagonist	7.55044					Ky	kyphoscoliosis peptidase	-10.911	Tgm5	transglutaminase 5	-3.13312
Matn4	matrilin 4						Lama5	laminin, alpha 5	-2.04391																			Ccl8	chemokine (C-C motif) ligand 8	7.15421					Adamts8	a disintegrin-like and metallopeptidase (reprolysin type) with thrombospondin type 1 motif, 8	-10.2807	Serpinb2	serine (or cysteine) peptidase inhibitor, clade B, member 2	-2.67152
Mepe	matrix extracellular phosphoglycoprotein with ASARM motif (bone)						Vit	vitrin	-2.07155																			Pgf	placental growth factor	6.83264					Hyal4	hyaluronoglucosaminidase 4	-8.56204	Mmp8	matrix metallopeptidase 8	-2.57077
Mfap1a	microfibrillar-associated protein 1A						Npnt	nephronectin	-2.69706																			Ppbp	pro-platelet basic protein	6.6502					Serpinb12	serine (or cysteine) peptidase inhibitor, clade B (ovalbumin), member 12	-7.99421	Serpinb6a	serine (or cysteine) peptidase inhibitor, clade B, member 6a	-1.8722
Mfap1b	microfibrillar-associated protein 1B						Fras1	Fraser syndrome 1 homolog (human)	-3.04691																			Ccl7	chemokine (C-C motif) ligand 7	6.46629					Prss12	protease, serine, 12 neurotrypsin (motopsin)	-7.34465	Ogfod2	2-oxoglutarate and iron-dependent oxygenase domain containing 2	-1.60961
Mfap2	microfibrillar-associated protein 2						Reln	reelin	-3.11151																			Tnfsf11	tumor necrosis factor (ligand) superfamily, member 11	6.38379					Serpina1b	serine (or cysteine) preptidase inhibitor, clade A, member 1B	-4.65401	Adam28	a disintegrin and metallopeptidase domain 28	-1.47295
Mfap3	microfibrillar-associated protein 3						Sbspon	predicted gene 106	-4.82614																			Areg	amphiregulin	6.2345					Adamtsl3	ADAMTS-like 3	-3.44925	Adamts5	a disintegrin-like and metallopeptidase (reprolysin type) with thrombospondin type 1 motif, 5 (aggrecanase-2)	-1.47253
Mfap4	microfibrillar-associated protein 4						Nell2	NEL-like 2 (chicken)	-6.44999																			Inhba	inhibin beta-A	5.61432					Serpini1	serine (or cysteine) peptidase inhibitor, clade I, member 1	-2.74183	Ctsf	cathepsin F	-1.44155
Mfap5	microfibrillar associated protein 5						Lamc3	laminin gamma 3	-14.4722																			Il1a	interleukin 1 alpha	5.16856					Adamtsl2	ADAMTS-like 2	-2.30244	Cst3	cystatin C	-1.27935
Mfge8	milk fat globule-EGF factor 8 protein						Rspo4	R-spondin family, member 4	-32.2747																			Ccl6	chemokine (C-C motif) ligand 6	4.8875					Pappa2	pappalysin 2	-2.07135	Adamts10	a disintegrin-like and metallopeptidase (reprolysin type) with thrombospondin type 1 motif, 10	1.791
Mgp	matrix Gla protein																											Angpt4	angiopoietin 4	4.28503					Itih4	inter alpha-trypsin inhibitor, heavy chain 4	-1.91069	Itih5	inter-alpha (globulin) inhibitor H5	2.25587
Mmrn1	multimerin 1																											Vegfa	vascular endothelial growth factor A	4.24163					Serpine3	serpin peptidase inhibitor, clade E (nexin, plasminogen activator inhibitor type 1), member 3	-1.53552	Mmp27	matrix metallopeptidase 27	2.46813
Mmrn2	multimerin 2																											Wnt7a	wingless-related MMTV integration site 7A	4.06079					Tll1	tolloid-like	-1.48635	Masp1	mannan-binding lectin serine peptidase 1	2.98144
Ndnf	RIKEN cDNA A930038C07 gene																											Fgf11	fibroblast growth factor 11	3.28487					Ngly1	N-glycanase 1	-1.31432	Mmp16	matrix metallopeptidase 16	3.09555
Nell1	NEL-like 1 (chicken)																											Tnfsf8	tumor necrosis factor (ligand) superfamily, member 8	3.05925					Egln1	EGL nine homolog 1 (C. elegans)	1.23654
Nell2	NEL-like 2 (chicken)																											Ccl12	chemokine (C-C motif) ligand 12	3.04652					Adam17	a disintegrin and metallopeptidase domain 17	1.32394
Nid1	nidogen 1																											Lefty1	left right determination factor 1	3.01848					Egln2	EGL nine homolog 2 (C. elegans)	1.34459
Nid2	nidogen 2																											S100a11	S100 calcium binding protein A11 (calgizzarin)	2.99031					Hpse	heparanase	1.37781
Nov	nephroblastoma overexpressed gene																											Crlf1	cytokine receptor-like factor 1	2.75507					Adam15	a disintegrin and metallopeptidase domain 15 (metargidin)	1.43041
Npnt	nephronectin																											Ccl28	chemokine (C-C motif) ligand 28	2.60435					Serpina3f	serine (or cysteine) peptidase inhibitor, clade A, member 3F	1.4325
Ntn1	netrin 1																											Fam132b	family with sequence similarity 132, member B	2.48162					Adamts1	a disintegrin-like and metallopeptidase (reprolysin type) with thrombospondin type 1 motif, 1	1.45341
Ntn3	netrin 3																											Ngf	nerve growth factor	2.47265					Hyal1	hyaluronoglucosaminidase 1	1.51981
Ntn4	netrin 4																											Fgf7	fibroblast growth factor 7	2.36242					Serpina3a	serine (or cysteine) peptidase inhibitor, clade A, member 3A	1.69396
Ntn5	netrin 5																											Wnt6	wingless-related MMTV integration site 6	2.26804					Adam10	a disintegrin and metallopeptidase domain 10	1.74274
Ntng1	netrin G1																											S100a10	S100 calcium binding protein A10 (calpactin)	2.24859					Hyal2	hyaluronoglucosaminidase 2	1.75293
Ntng2	netrin G2																											Gdf11	growth differentiation factor 11	1.88313					Serpinb10	serine (or cysteine) peptidase inhibitor, clade B (ovalbumin), member 10	1.81344
Oit3	oncoprotein induced transcript 3																											Fgf2	fibroblast growth factor 2	1.81853					Ctso	cathepsin O	2.09756
Otog	otogelin																											Il1f8	interleukin 1 family, member 8	1.71692					Serpina3b	serine (or cysteine) peptidase inhibitor, clade A, member 3B	2.12696
Otogl	predicted gene 6924																											Tnfsf13	tumor necrosis factor (ligand) superfamily, member 13	1.61218					Serpina3m	serine (or cysteine) peptidase inhibitor, clade A, member 3M	2.25477
Otol1	predicted gene 414																											Chrd	chordin	1.56028					Fam20c	family with sequence similarity 20, member c	2.7682
Papln	papilin, proteoglycan-like sulfated glycoprotein																											Il16	interleukin 16	1.39872					Ctse	cathepsin E	3.14268
Pcolce	procollagen C-endopeptidase enhancer protein																											Fst	follistatin	-1.32168					Fam20a	family with sequence similarity 20, member a	3.38843
Pcolce2	procollagen C-endopeptidase enhancer 2																											Csf1	colony stimulating factor 1 (macrophage)	-1.47051					Htra4	HtrA serine peptidase 4	3.63534
Postn	periostin, osteoblast specific factor																											Fgf9	fibroblast growth factor 9	-1.491					Serpinb1a	serine (or cysteine) peptidase inhibitor, clade B, member 1a	4.11477
Pxdn	peroxidasin homolog (Drosophila)																											Vegfb	vascular endothelial growth factor B	-1.56154					Adam8	a disintegrin and metallopeptidase domain 8	4.57801
Reln	reelin																											Wnt16	wingless-related MMTV integration site 16	-1.58211					Mmp10	matrix metallopeptidase 10	5.35307
Rspo1	R-spondin homolog (Xenopus laevis)																											Flt3l	FMS-like tyrosine kinase 3 ligand	-1.58266					Mmp25	matrix metallopeptidase 25	5.63383
Rspo2	R-spondin 2 homolog (Xenopus laevis)																											Tnfsf15	tumor necrosis factor (ligand) superfamily, member 15	-1.6312					Slpi	secretory leukocyte peptidase inhibitor	39.6268
Rspo3	R-spondin 3 homolog (Xenopus laevis)																											Bmp7	bone morphogenetic protein 7	-1.63141					Serpine1	serine (or cysteine) peptidase inhibitor, clade E, member 1	40.8948
Rspo4	R-spondin family, member 4																											Wnt11	wingless-related MMTV integration site 11	-1.66426					Stfa2	stefin A2	49.2597
Sbspon	predicted gene 106																											Cxcl12	chemokine (C-X-C motif) ligand 12	-1.84193
Slamf6	SLAM family member 6																											Tdgf1	teratocarcinoma-derived growth factor 1	-1.99928
Slit1	slit homolog 1 (Drosophila)																											Il17d	interleukin 17D	-2.08725
Slit2	slit homolog 2 (Drosophila)																											Cxcl9	chemokine (C-X-C motif) ligand 9	-2.25341
Slit3	slit homolog 3 (Drosophila)																											Tnfsf10	tumor necrosis factor (ligand) superfamily, member 10	-2.31539
Smoc1	SPARC related modular calcium binding 1																											Fgf10	fibroblast growth factor 10	-2.33992
Smoc2	SPARC related modular calcium binding 2																											Fgfbp3	fibroblast growth factor binding protein 3	-2.34181
Sned1	sushi, nidogen and EGF-like domains 1																											Ntf3	neurotrophin 3	-2.53933
Sparc	secreted acidic cysteine rich glycoprotein																											Bmp4	bone morphogenetic protein 4	-2.70139
Sparcl1	SPARC-like 1																											Ntf5	neurotrophin 5	-3.25624
Spon1	spondin 1, (f-spondin) extracellular matrix protein																											Mst1	macrophage stimulating 1 (hepatocyte growth factor-like)	-3.59254
Spon2	spondin 2, extracellular matrix protein																											Ctf1	cardiotrophin 1	-3.76354
Spp1	secreted phosphoprotein 1																											Gdf1	growth differentiation factor 1	-3.83571
Srpx	sushi-repeat-containing protein																											Cxcl14	chemokine (C-X-C motif) ligand 14	-4.11822
Srpx2	sushi-repeat-containing protein, X-linked 2																											Egfl8	EGF-like domain 8	-5.31687
Sspo	SCO-spondin																											Il1f10	interleukin 1 family, member 10	-5.99142
Svep1	sushi, von Willebrand factor type A, EGF and pentraxin domain containing 1																											Fgf12	fibroblast growth factor 12	-6.65225
Tecta	tectorin alpha																											Egf	epidermal growth factor	-8.11444
Tectb	tectorin beta																											Scube1	signal peptide, CUB domain, EGF-like 1	-17.4843
Tgfbi	transforming growth factor, beta induced																											Frzb	frizzled-related protein	-19.4297
Thbs1	thrombospondin 1																											Ccl21c	chemokine (C-C motif) ligand 21C (leucine)	-19.5696
Thbs2	thrombospondin 2
Thbs3	thrombospondin 3
Thbs4	thrombospondin 4
Thsd4	thrombospondin, type I, domain containing 4
Tinag	tubulointerstitial nephritis antigen
Tinagl1	tubulointerstitial nephritis antigen-like 1
Tnc	tenascin C
Tnfaip6	tumor necrosis factor alpha induced protein 6
Tnn	tenascin N
Tnr	tenascin R
Tnxb	tenascin XB
Tsku	tsukushin
Tspear	RIKEN cDNA C330046G03 gene
Vit	vitrin
Vtn	vitronectin
Vwa1	von Willebrand factor A domain containing 1
Vwa2	von Willebrand factor A domain containing 2
Vwa3a	von Willebrand factor A domain containing 3A
Vwa3b	von Willebrand factor A domain containing 3B
Vwa5a	von Willebrand factor A domain containing 5A
Vwa5b1	von Willebrand factor A domain containing 5B1
Vwa5b2	von Willebrand factor A domain containing 5B2
Vwa7	DNA segment, Chr 17, human D6S56E 3
Vwa9	RIKEN cDNA 2010321M09 gene
Vwce	von Willebrand factor C and EGF domains
Vwde	von Willebrand factor D and EGF domains
Vwf	Von Willebrand factor homolog
Wisp1	WNT1 inducible signaling pathway protein 1
Wisp2	WNT1 inducible signaling pathway protein 2
Wisp3	WNT1 inducible signaling pathway protein 3
Zp1	zona pellucida glycoprotein 1
Zp2	zona pellucida glycoprotein 2
Zp3	zona pellucida glycoprotein 3
Zp3r	zona pellucida 3 receptor
Zpld1	zona pellucida like domain containing 1
Col10a1	collagen, type X, alpha 1
Col11a1	collagen, type XI, alpha 1
Col11a2	collagen, type XI, alpha 2
Col12a1	collagen, type XII, alpha 1
Col13a1	collagen, type XIII, alpha 1
Col14a1	collagen, type XIV, alpha 1
Col15a1	collagen, type XV, alpha 1
Col16a1	collagen, type XVI, alpha 1
Col17a1	collagen, type XVII, alpha 1
Col18a1	collagen, type XVIII, alpha 1
Col19a1	collagen, type XIX, alpha 1
Col1a1	collagen, type I, alpha 1
Col1a2	collagen, type I, alpha 2
Col20a1	collagen, type XX, alpha 1
Col22a1	collagen, type XXII, alpha 1
Col23a1	collagen, type XXIII, alpha 1
Col24a1	collagen, type XXIV, alpha 1
Col25a1	collagen, type XXV, alpha 1
Col26a1	EMI domain containing 2
Col27a1	collagen, type XXVII, alpha 1
Col28a1	collagen, type XXVIII, alpha 1
Col2a1	collagen, type II, alpha 1
Col3a1	collagen, type III, alpha 1
Col4a1	collagen, type IV, alpha 1
Col4a2	collagen, type IV, alpha 2
Col4a3	collagen, type IV, alpha 3
Col4a4	collagen, type IV, alpha 4
Col4a5	collagen, type IV, alpha 5
Col4a6	collagen, type IV, alpha 6
Col5a1	collagen, type V, alpha 1
Col5a2	collagen, type V, alpha 2
Col5a3	collagen, type V, alpha 3
Col6a1	collagen, type VI, alpha 1
Col6a2	collagen, type VI, alpha 2
Col6a3	collagen, type VI, alpha 3
Col6a4	collagen, type VI, alpha 4
Col6a5	predicted gene 7455
Col6a6	collagen, type VI, alpha 6
Col7a1	collagen, type VII, alpha 1
Col8a1	collagen, type VIII, alpha 1
Col8a2	collagen, type VIII, alpha 2
Col9a1	collagen, type IX, alpha 1
Col9a2	collagen, type IX, alpha 2
Col9a3	collagen, type IX, alpha 3
Acan	aggrecan
Aspn	asporin
Bcan	brevican
Bgn	biglycan
Chad	chondroadherin
Chadl	chondroadherin-like
Dcn	decorin
Epyc	epiphycan
Esm1	endothelial cell-specific molecule 1
Fmod	fibromodulin
Hapln1	hyaluronan and proteoglycan link protein 1
Hapln2	hyaluronan and proteoglycan link protein 2
Hapln3	hyaluronan and proteoglycan link protein 3
Hapln4	hyaluronan and proteoglycan link protein 4
Hspg2	perlecan (heparan sulfate proteoglycan 2)
Impg1	interphotoreceptor matrix proteoglycan 1
Impg2	interphotoreceptor matrix proteoglycan 2
Kera	keratocan
Lum	lumican
Ncan	neurocan
Nepn	nephrocan
Nyx	nyctalopin
Ogn	osteoglycin
Omd	osteomodulin
Optc	opticin
Podn	podocan
Podnl1	podocan-like 1
Prelp	proline arginine-rich end leucine-rich repeat
Prg2	proteoglycan 2, bone marrow
Prg3	proteoglycan 3
Prg4	proteoglycan 4 (megakaryocyte stimulating factor, articular superficial zone protein)
Spock1	sparc/osteonectin, cwcv and kazal-like domains proteoglycan 1
Spock2	sparc/osteonectin, cwcv and kazal-like domains proteoglycan 2
Spock3	sparc/osteonectin, cwcv and kazal-like domains proteoglycan 3
Srgn	serglycin
Vcan	versican
Anxa1	annexin A1
Anxa10	annexin A10
Anxa11	annexin A11
Anxa13	annexin A13
Anxa2	annexin A2
Anxa3	annexin A3
Anxa4	annexin A4
Anxa5	annexin A5
Anxa6	annexin A6
Anxa7	annexin A7
Anxa8	annexin A8
Anxa9	annexin A9
C1qa	complement component 1, q subcomponent, alpha polypeptide
C1qb	complement component 1, q subcomponent, beta polypeptide
C1qc	complement component 1, q subcomponent, C chain
C1ql1	complement component 1, q subcomponent-like 1
C1ql2	complement component 1, q subcomponent-like 2
C1ql3	C1q-like 3
C1ql4	complement component 1, q subcomponent-like 4
C1qtnf1	C1q and tumor necrosis factor related protein 1
C1qtnf2	C1q and tumor necrosis factor related protein 2
C1qtnf3	C1q and tumor necrosis factor related protein 3
C1qtnf4	C1q and tumor necrosis factor related protein 4
C1qtnf5	C1q and tumor necrosis factor related protein 5
C1qtnf6	C1q and tumor necrosis factor related protein 6
C1qtnf7	C1q and tumor necrosis factor related protein 7
C1qtnf9	C1q and tumor necrosis factor related protein 9
Cd209a	CD209a antigen
Cd209b	CD209b antigen
Cd209d	CD209d antigen
Clc	Charcot-Leyden crystal protein
Clec10a	C-type lectin domain family 10, member A
Clec11a	C-type lectin domain family 11, member a
Clec12a	C-type lectin domain family 12, member a
Clec12b	C-type lectin domain family 12, member B
Clec14a	C-type lectin domain family 14, member a
Clec18a	C-type lectin domain family 18, member A
Clec1a	C-type lectin domain family 1, member a
Clec1b	C-type lectin domain family 1, member b
Clec2d	C-type lectin domain family 2, member d
Clec2e	C-type lectin domain family 2, member e
Clec2g	C-type lectin domain family 2, member g
Clec2h	C-type lectin domain family 2, member h
Clec2i	C-type lectin domain family 2, member i
Clec2j	C-type lectin domain family 2, member J
Clec2l	C-type lectin domain family, member L
Clec3a	C-type lectin domain family 3, member a
Clec3b	C-type lectin domain family 3, member b
Clec4a1	C-type lectin domain family 4, member a1
Clec4a2	C-type lectin domain family 4, member a2
Clec4a3	C-type lectin domain family 4, member a3
Clec4a4	C-type lectin domain family 4, member a4
Clec4b1	C-type lectin domain family 4, member b1
Clec4b2	C-type lectin domain family 4, member b2
Clec4d	C-type lectin domain family 4, member d
Clec4e	C-type lectin domain family 4, member e
Clec4f	C-type lectin domain family 4, member f
Clec4g	C-type lectin domain family 4, member g
Clec4n	C-type lectin domain family 4, member n
Clec5a	C-type lectin domain family 5, member a
Clec7a	C-type lectin domain family 7, member a
Clec9a	C-type lectin domain family 9, member a
Colec10	collectin sub-family member 10
Colec11	collectin sub-family member 11
Colec12	collectin sub-family member 12
Cspg4	chondroitin sulfate proteoglycan 4
Cspg5	chondroitin sulfate proteoglycan 5
Elfn1	leucine rich repeat and fibronectin type III, extracellular 1
Elfn2	leucine rich repeat and fibronectin type III, extracellular 2
Emcn	endomucin
Fcna	ficolin A
Fcnb	ficolin B
Frem1	Fras1 related extracellular matrix protein 1
Frem2	Fras1 related extracellular matrix protein 2
Frem3	Fras1 related extracellular matrix protein 3
Gm7534	predicted gene 7534
Gm9573	predicted gene 9573
Gpc1	glypican 1
Gpc2	glypican 2 (cerebroglycan)
Gpc3	glypican 3
Gpc4	glypican 4
Gpc5	glypican 5
Gpc6	glypican 6
Grem1	gremlin 1
Grifin	galectin-related inter-fiber protein
Hpx	hemopexin
Itln1	intelectin 1 (galactofuranose binding)
Itlnb	intelectin b
Lgals1	lectin, galactose binding, soluble 1
Lgals12	lectin, galactose binding, soluble 12
Lgals2	lectin, galactose-binding, soluble 2
Lgals3	lectin, galactose binding, soluble 3
Lgals4	lectin, galactose binding, soluble 4
Lgals6	lectin, galactose binding, soluble 6
Lgals7	lectin, galactose binding, soluble 7
Lgals8	lectin, galactose binding, soluble 8
Lgals9	lectin, galactose binding, soluble 9
Lgalsl	RIKEN cDNA 1110067D22 gene
Lman1	lectin, mannose-binding, 1
Lman1l	lectin, mannose-binding 1 like
Mbl1	mannose-binding lectin (protein A) 1
Mbl2	mannose-binding lectin (protein C) 2
Muc1	mucin 1, transmembrane
Muc13	mucin 13, epithelial transmembrane
Muc15	mucin 15
Muc16	mucin 16
Muc19	mucin 19
Muc2	mucin 2
Muc20	mucin 20
Muc3	mucin 3, intestinal
Muc4	mucin 4
Muc5ac	mucin 5, subtypes A and C, tracheobronchial/gastric
Muc5b	mucin 5, subtype B, tracheobronchial
Muc6	mucin 6, gastric
Mucl1	mucin-like 1
Ovgp1	oviductal glycoprotein 1
Parm1	prostate androgen-regulated mucin-like protein 1
Plxdc1	plexin domain containing 1
Plxdc2	plexin domain containing 2
Plxna1	plexin A1
Plxna2	plexin A2
Plxna3	plexin A3
Plxna4	plexin A4
Plxnb1	plexin B1
Plxnb2	plexin B2
Plxnb3	plexin B3
Plxnc1	plexin C1
Plxnd1	plexin D1
Prol1	proline rich, lacrimal 1
Reg1	regenerating islet-derived 1
Reg2	regenerating islet-derived 2
Reg3a	regenerating islet-derived 3 alpha
Reg3b	regenerating islet-derived 3 beta
Reg3d	regenerating islet-derived 3 delta
Reg3g	regenerating islet-derived 3 gamma
Reg4	regenerating islet-derived family, member 4
Sdc1	syndecan 1
Sdc2	syndecan 2
Sdc3	syndecan 3
Sdc4	syndecan 4
Sema3a	sema domain, immunoglobulin domain (Ig), short basic domain, secreted, (semaphorin) 3A
Sema3b	sema domain, immunoglobulin domain (Ig), short basic domain, secreted, (semaphorin) 3B
Sema3c	sema domain, immunoglobulin domain (Ig), short basic domain, secreted, (semaphorin) 3C
Sema3d	sema domain, immunoglobulin domain (Ig), short basic domain, secreted, (semaphorin) 3D
Sema3e	sema domain, immunoglobulin domain (Ig), short basic domain, secreted, (semaphorin) 3E
Sema3f	sema domain, immunoglobulin domain (Ig), short basic domain, secreted, (semaphorin) 3F
Sema3g	sema domain, immunoglobulin domain (Ig), short basic domain, secreted, (semaphorin) 3G
Sema4a	sema domain, immunoglobulin domain (Ig), transmembrane domain (TM) and short cytoplasmic domain, (semaphorin) 4A
Sema4b	sema domain, immunoglobulin domain (Ig), transmembrane domain (TM) and short cytoplasmic domain, (semaphorin) 4B
Sema4c	sema domain, immunoglobulin domain (Ig), transmembrane domain (TM) and short cytoplasmic domain, (semaphorin) 4C
Sema4d	sema domain, immunoglobulin domain (Ig), transmembrane domain (TM) and short cytoplasmic domain, (semaphorin) 4D
Sema4f	sema domain, immunoglobulin domain (Ig), TM domain, and short cytoplasmic domain
Sema4g	sema domain, immunoglobulin domain (Ig), transmembrane domain (TM) and short cytoplasmic domain, (semaphorin) 4G
Sema5a	sema domain, seven thrombospondin repeats (type 1 and type 1-like), transmembrane domain (TM) and short cytoplasmic domain, (semaphorin) 5A
Sema5b	sema domain, seven thrombospondin repeats (type 1 and type 1-like), transmembrane domain (TM) and short cytoplasmic domain, (semaphorin) 5B
Sema6a	sema domain, transmembrane domain (TM), and cytoplasmic domain, (semaphorin) 6A
Sema6b	sema domain, transmembrane domain (TM), and cytoplasmic domain, (semaphorin) 6B
Sema6c	sema domain, transmembrane domain (TM), and cytoplasmic domain, (semaphorin) 6C
Sema6d	sema domain, transmembrane domain (TM), and cytoplasmic domain, (semaphorin) 6D
Sema7a	sema domain, immunoglobulin domain (Ig), and GPI membrane anchor, (semaphorin) 7A
Sfta2	surfactant associated 2
Sftpa1	surfactant associated protein A1
Sftpb	surfactant associated protein B
Sftpc	surfactant associated protein C
Sftpd	surfactant associated protein D
1810010H24Rik	RIKEN cDNA 1810010H24 gene
2010005H15Rik	RIKEN cDNA 2010005H15 gene
8030411F24Rik	RIKEN cDNA 8030411F24 gene
9230104L09Rik	RIKEN cDNA 9230104L09 gene
A2m	alpha-2-macroglobulin
Adam10	a disintegrin and metallopeptidase domain 10
Adam11	a disintegrin and metallopeptidase domain 11
Adam12	a disintegrin and metallopeptidase domain 12 (meltrin alpha)
Adam15	a disintegrin and metallopeptidase domain 15 (metargidin)
Adam17	a disintegrin and metallopeptidase domain 17
Adam18	a disintegrin and metallopeptidase domain 18
Adam19	a disintegrin and metallopeptidase domain 19 (meltrin beta)
Adam1a	a disintegrin and metallopeptidase domain 1a
Adam1b	a disintegrin and metallopeptidase domain 1b
Adam2	a disintegrin and metallopeptidase domain 2
Adam20	RIKEN cDNA 4930529F22 gene
Adam21	a disintegrin and metallopeptidase domain 21
Adam22	a disintegrin and metallopeptidase domain 22
Adam23	a disintegrin and metallopeptidase domain 23
Adam24	a disintegrin and metallopeptidase domain 24 (testase 1)
Adam25	a disintegrin and metallopeptidase domain 25 (testase 2)
Adam26a	a disintegrin and metallopeptidase domain 26A (testase 3)
Adam26b	a disintegrin and metallopeptidase domain 26B
Adam28	a disintegrin and metallopeptidase domain 28
Adam29	a disintegrin and metallopeptidase domain 29
Adam3	a disintegrin and metallopeptidase domain 3 (cyritestin)
Adam30	a disintegrin and metallopeptidase domain 30
Adam32	a disintegrin and metallopeptidase domain 32
Adam33	a disintegrin and metallopeptidase domain 33
Adam34	a disintegrin and metallopeptidase domain 34
Adam39	a disintegrin and metallopeptidase domain 39
Adam4	a disintegrin and metallopeptidase domain 4
Adam5	a disintegrin and metallopeptidase domain 5
Adam6a	a disintegrin and metallopeptidase domain 6A
Adam6b	a disintegrin and metallopeptidase domain 6B
Adam7	a disintegrin and metallopeptidase domain 7
Adam8	a disintegrin and metallopeptidase domain 8
Adam9	a disintegrin and metallopeptidase domain 9 (meltrin gamma)
Adamdec1	ADAM-like, decysin 1
Adamts1	a disintegrin-like and metallopeptidase (reprolysin type) with thrombospondin type 1 motif, 1
Adamts10	a disintegrin-like and metallopeptidase (reprolysin type) with thrombospondin type 1 motif, 10
Adamts12	a disintegrin-like and metallopeptidase (reprolysin type) with thrombospondin type 1 motif, 12
Adamts13	a disintegrin-like and metallopeptidase (reprolysin type) with thrombospondin type 1 motif, 13
Adamts14	a disintegrin-like and metallopeptidase (reprolysin type) with thrombospondin type 1 motif, 14
Adamts15	a disintegrin-like and metallopeptidase (reprolysin type) with thrombospondin type 1 motif, 15
Adamts16	a disintegrin-like and metallopeptidase (reprolysin type) with thrombospondin type 1 motif, 16
Adamts17	a disintegrin-like and metallopeptidase (reprolysin type) with thrombospondin type 1 motif, 17
Adamts18	a disintegrin-like and metallopeptidase (reprolysin type) with thrombospondin type 1 motif, 18
Adamts19	a disintegrin-like and metallopeptidase (reprolysin type) with thrombospondin type 1 motif, 19
Adamts2	a disintegrin-like and metallopeptidase (reprolysin type) with thrombospondin type 1 motif, 2
Adamts20	a disintegrin-like and metallopeptidase (reprolysin type) with thrombospondin type 1 motif, 20
Adamts3	a disintegrin-like and metallopeptidase (reprolysin type) with thrombospondin type 1 motif, 3
Adamts4	a disintegrin-like and metallopeptidase (reprolysin type) with thrombospondin type 1 motif, 4
Adamts5	a disintegrin-like and metallopeptidase (reprolysin type) with thrombospondin type 1 motif, 5 (aggrecanase-2)
Adamts6	a disintegrin-like and metallopeptidase (reprolysin type) with thrombospondin type 1 motif, 6
Adamts7	a disintegrin-like and metallopeptidase (reprolysin type) with thrombospondin type 1 motif, 7
Adamts8	a disintegrin-like and metallopeptidase (reprolysin type) with thrombospondin type 1 motif, 8
Adamts9	a disintegrin-like and metallopeptidase (reprolysin type) with thrombospondin type 1 motif, 9
Adamtsl1	ADAMTS-like 1
Adamtsl2	ADAMTS-like 2
Adamtsl3	ADAMTS-like 3
Adamtsl4	ADAMTS-like 4
Adamtsl5	ADAMTS-like 5
Agt	angiotensinogen (serpin peptidase inhibitor, clade A, member 8)
AI182371	expressed sequence AI182371
Ambp	alpha 1 microglobulin/bikunin
Astl	astacin-like metalloendopeptidase (M12 family)
BC048546	cDNA sequence BC048546
BC051665	cDNA sequence BC051665
BC100530	cDNA sequence BC100530
BC117090	cDNA sequence BC1179090
Bmp1	bone morphogenetic protein 1
Cd109	CD109 antigen
Cela1	chymotrypsin-like elastase family, member 1
Cela2a	chymotrypsin-like elastase family, member 2A
Cela3b	chymotrypsin-like elastase family, member 3B
Cpn2	carboxypeptidase N, polypeptide 2
Cst10	cystatin 10 (chondrocytes)
Cst11	cystatin 11
Cst12	cystatin 12
Cst13	cystatin 13
Cst3	cystatin C
Cst6	cystatin E/M
Cst7	cystatin F (leukocystatin)
Cst8	cystatin 8 (cystatin-related epididymal spermatogenic)
Cst9	cystatin 9
Csta1	cystatin A
Cstb	cystatin B
Cstl1	cystatin-like 1
Cts3	cathepsin 3
Cts6	cathepsin 6
Cts7	cathepsin 7
Cts8	cathepsin 8
Ctsa	cathepsin A
Ctsb	cathepsin B
Ctsc	cathepsin C
Ctsd	cathepsin D
Ctse	cathepsin E
Ctsf	cathepsin F
Ctsg	cathepsin G
Ctsh	cathepsin H
Ctsj	cathepsin J
Ctsk	cathepsin K
Ctsl	cathepsin L
Ctsll3	cathepsin L-like 3
Ctsm	cathepsin M
Ctso	cathepsin O
Ctsq	cathepsin Q
Ctsr	cathepsin R
Ctss	cathepsin S
Ctsw	cathepsin W
Ctsz	cathepsin Z
Egln1	EGL nine homolog 1 (C. elegans)
Egln2	EGL nine homolog 2 (C. elegans)
Egln3	EGL nine homolog 3 (C. elegans)
Elane	elastase, neutrophil expressed
F10	coagulation factor X
F12	coagulation factor XII (Hageman factor)
F13a1	coagulation factor XIII, A1 subunit
F13b	coagulation factor XIII, beta subunit
F2	coagulation factor II
F7	coagulation factor VII
F9	coagulation factor IX
Fam20a	family with sequence similarity 20, member a
Fam20b	family with sequence similarity 20, member b
Fam20c	family with sequence similarity 20, member c
Gm10334	predicted gene 10334
Gm13011	predicted gene 13011
Gm4758	predicted gene 4758
Gm4787	predicted gene 4787
Gm5347	predicted gene 5347
Gm5409	predicted pseudogene 5409
Gm5416	predicted gene 5416
Gm5483	predicted gene 5483
Gm5771	predicted gene 5771
Habp2	hyaluronic acid binding protein 2
Hpse	heparanase
Hpse2	heparanase 2
Hrg	histidine-rich glycoprotein
Htra1	HtrA serine peptidase 1
Htra3	HtrA serine peptidase 3
Htra4	HtrA serine peptidase 4
Hyal1	hyaluronoglucosaminidase 1
Hyal2	hyaluronoglucosaminidase 2
Hyal3	hyaluronoglucosaminidase 3
Hyal4	hyaluronoglucosaminidase 4
Hyal5	hyaluronoglucosaminidase 5
Hyal6	hyaluronoglucosaminidase 6
Itih1	inter-alpha trypsin inhibitor, heavy chain 1
Itih2	inter-alpha trypsin inhibitor, heavy chain 2
Itih3	inter-alpha trypsin inhibitor, heavy chain 3
Itih4	inter alpha-trypsin inhibitor, heavy chain 4
Itih5	inter-alpha (globulin) inhibitor H5
Kazald1	Kazal-type serine peptidase inhibitor domain 1
Kng1	kininogen 1
Kng2	kininogen 2
Ky	kyphoscoliosis peptidase
Lepre1	leprecan 1
Leprel1	leprecan-like 1
Leprel2	leprecan-like 2
Lox	lysyl oxidase
Loxl1	lysyl oxidase-like 1
Loxl2	lysyl oxidase-like 2
Loxl3	lysyl oxidase-like 3
Loxl4	lysyl oxidase-like 4
Masp1	mannan-binding lectin serine peptidase 1
Masp2	mannan-binding lectin serine peptidase 2
Mep1a	meprin 1 alpha
Mep1b	meprin 1 beta
Mmp10	matrix metallopeptidase 10
Mmp11	matrix metallopeptidase 11
Mmp12	matrix metallopeptidase 12
Mmp13	matrix metallopeptidase 13
Mmp14	matrix metallopeptidase 14 (membrane-inserted)
Mmp15	matrix metallopeptidase 15
Mmp16	matrix metallopeptidase 16
Mmp17	matrix metallopeptidase 17
Mmp19	matrix metallopeptidase 19
Mmp1a	matrix metallopeptidase 1a (interstitial collagenase)
Mmp1b	matrix metallopeptidase 1b (interstitial collagenase)
Mmp2	matrix metallopeptidase 2
Mmp20	matrix metallopeptidase 20 (enamelysin)
Mmp21	matrix metallopeptidase 21
Mmp23	matrix metallopeptidase 23
Mmp24	matrix metallopeptidase 24
Mmp25	matrix metallopeptidase 25
Mmp27	matrix metallopeptidase 27
Mmp28	matrix metallopeptidase 28 (epilysin)
Mmp3	matrix metallopeptidase 3
Mmp7	matrix metallopeptidase 7
Mmp8	matrix metallopeptidase 8
Mmp9	matrix metallopeptidase 9
Mug2	C3 and PZP-like, alpha-2-macroglobulin domain containing 8
Ngly1	N-glycanase 1
Ogfod1	2-oxoglutarate and iron-dependent oxygenase domain containing 1
Ogfod2	2-oxoglutarate and iron-dependent oxygenase domain containing 2
P4ha1	procollagen-proline, 2-oxoglutarate 4-dioxygenase (proline 4-hydroxylase), alpha 1 polypeptide
P4ha2	procollagen-proline, 2-oxoglutarate 4-dioxygenase (proline 4-hydroxylase), alpha II polypeptide
P4ha3	procollagen-proline, 2-oxoglutarate 4-dioxygenase (proline 4-hydroxylase), alpha polypeptide III
P4htm	prolyl 4-hydroxylase, transmembrane (endoplasmic reticulum)
Pamr1	peptidase domain containing associated with muscle regeneration 1
Pappa	pregnancy-associated plasma protein A
Pappa2	pappalysin 2
Pcsk5	proprotein convertase subtilisin/kexin type 5
Pcsk6	proprotein convertase subtilisin/kexin type 6
Plat	plasminogen activator, tissue
Plau	plasminogen activator, urokinase
Plg	plasminogen
Plod1	procollagen-lysine, 2-oxoglutarate 5-dioxygenase 1
Plod2	procollagen lysine, 2-oxoglutarate 5-dioxygenase 2
Plod3	procollagen-lysine, 2-oxoglutarate 5-dioxygenase 3
Prss1	protease, serine, 1 (trypsin 1)
Prss12	protease, serine, 12 neurotrypsin (motopsin)
Prss2	protease, serine, 2
Prss3	protease, serine, 3
Pzp	pregnancy zone protein
Serpina10	serine (or cysteine) peptidase inhibitor, clade A (alpha-1 antiproteinase, antitrypsin), member 10
Serpina11	serine (or cysteine) peptidase inhibitor, clade A (alpha-1 antiproteinase, antitrypsin), member 11
Serpina12	serine (or cysteine) peptidase inhibitor, clade A (alpha-1 antiproteinase, antitrypsin), member 12
Serpina1a	serine (or cysteine) peptidase inhibitor, clade A, member 1A
Serpina1b	serine (or cysteine) preptidase inhibitor, clade A, member 1B
Serpina1c	serine (or cysteine) peptidase inhibitor, clade A, member 1C
Serpina1d	serine (or cysteine) peptidase inhibitor, clade A, member 1D
Serpina1e	serine (or cysteine) peptidase inhibitor, clade A, member 1E
Serpina1f	serine (or cysteine) peptidase inhibitor, clade A, member 1F
Serpina3a	serine (or cysteine) peptidase inhibitor, clade A, member 3A
Serpina3b	serine (or cysteine) peptidase inhibitor, clade A, member 3B
Serpina3c	serine (or cysteine) peptidase inhibitor, clade A, member 3C
Serpina3f	serine (or cysteine) peptidase inhibitor, clade A, member 3F
Serpina3g	serine (or cysteine) peptidase inhibitor, clade A, member 3G
Serpina3k	serine (or cysteine) peptidase inhibitor, clade A, member 3K
Serpina3m	serine (or cysteine) peptidase inhibitor, clade A, member 3M
Serpina3n	serine (or cysteine) peptidase inhibitor, clade A, member 3N
Serpina5	serine (or cysteine) peptidase inhibitor, clade A, member 5
Serpina6	serine (or cysteine) peptidase inhibitor, clade A, member 6
Serpina7	serine (or cysteine) peptidase inhibitor, clade A (alpha-1 antiproteinase, antitrypsin), member 7
Serpina9	serine (or cysteine) peptidase inhibitor, clade A (alpha-1 antiproteinase, antitrypsin), member 9
Serpinb10	serine (or cysteine) peptidase inhibitor, clade B (ovalbumin), member 10
Serpinb11	serine (or cysteine) peptidase inhibitor, clade B (ovalbumin), member 11
Serpinb12	serine (or cysteine) peptidase inhibitor, clade B (ovalbumin), member 12
Serpinb13	serine (or cysteine) peptidase inhibitor, clade B (ovalbumin), member 13
Serpinb1a	serine (or cysteine) peptidase inhibitor, clade B, member 1a
Serpinb1b	serine (or cysteine) peptidase inhibitor, clade B, member 1b
Serpinb1c	serine (or cysteine) peptidase inhibitor, clade B, member 1c
Serpinb2	serine (or cysteine) peptidase inhibitor, clade B, member 2
Serpinb3a	serine (or cysteine) peptidase inhibitor, clade B (ovalbumin), member 3A
Serpinb3b	serine (or cysteine) peptidase inhibitor, clade B (ovalbumin), member 3B
Serpinb3c	serine (or cysteine) peptidase inhibitor, clade B, member 3C
Serpinb3d	serine (or cysteine) peptidase inhibitor, clade B (ovalbumin), member 3D
Serpinb5	serine (or cysteine) peptidase inhibitor, clade B, member 5
Serpinb6a	serine (or cysteine) peptidase inhibitor, clade B, member 6a
Serpinb6b	serine (or cysteine) peptidase inhibitor, clade B, member 6b
Serpinb6c	serine (or cysteine) peptidase inhibitor, clade B, member 6c
Serpinb6d	serine (or cysteine) peptidase inhibitor, clade B, member 6d
Serpinb7	serine (or cysteine) peptidase inhibitor, clade B, member 7
Serpinb8	serine (or cysteine) peptidase inhibitor, clade B, member 8
Serpinb9	serine (or cysteine) peptidase inhibitor, clade B, member 9
Serpinb9b	serine (or cysteine) peptidase inhibitor, clade B, member 9b
Serpinb9c	serine (or cysteine) peptidase inhibitor, clade B, member 9c
Serpinb9d	serine (or cysteine) peptidase inhibitor, clade B, member 9d
Serpinb9e	serine (or cysteine) peptidase inhibitor, clade B, member 9e
Serpinb9f	serine (or cysteine) peptidase inhibitor, clade B, member 9f
Serpinb9g	serine (or cysteine) peptidase inhibitor, clade B, member 9g
Serpinc1	serine (or cysteine) peptidase inhibitor, clade C (antithrombin), member 1
Serpind1	serine (or cysteine) peptidase inhibitor, clade D, member 1
Serpine1	serine (or cysteine) peptidase inhibitor, clade E, member 1
Serpine2	serine (or cysteine) peptidase inhibitor, clade E, member 2
Serpine3	serpin peptidase inhibitor, clade E (nexin, plasminogen activator inhibitor type 1), member 3
Serpinf1	serine (or cysteine) peptidase inhibitor, clade F, member 1
Serpinf2	serine (or cysteine) peptidase inhibitor, clade F, member 2
Serping1	serine (or cysteine) peptidase inhibitor, clade G, member 1
Serpinh1	serine (or cysteine) peptidase inhibitor, clade H, member 1
Serpini1	serine (or cysteine) peptidase inhibitor, clade I, member 1
Serpini2	serine (or cysteine) peptidase inhibitor, clade I, member 2
Slpi	secretory leukocyte peptidase inhibitor
Spam1	sperm adhesion molecule 1
Spinkl	RIKEN cDNA 9530002K18 gene
St14	suppression of tumorigenicity 14 (colon carcinoma)
Stfa1	stefin A1
Stfa2	stefin A2
Stfa2l1	stefin A2 like 1
Stfa3	stefin A3
Sulf1	sulfatase 1
Sulf2	sulfatase 2
Tgm1	transglutaminase 1, K polypeptide
Tgm2	transglutaminase 2, C polypeptide
Tgm3	transglutaminase 3, E polypeptide
Tgm4	transglutaminase 4 (prostate)
Tgm5	transglutaminase 5
Tgm6	transglutaminase 6
Tgm7	transglutaminase 7
Timp1	tissue inhibitor of metalloproteinase 1
Timp2	tissue inhibitor of metalloproteinase 2
Timp3	tissue inhibitor of metalloproteinase 3
Timp4	tissue inhibitor of metalloproteinase 4
Tll1	tolloid-like
Tll2	tolloid-like 2
Tmprss15	protease, serine, 7 (enterokinase)
Tpbpa	trophoblast specific protein alpha
Tpbpb	trophoblast specific protein beta
Try10	trypsin 10
Try4	trypsin 4
Try5	trypsin 5
U06147	cDNA sequence U06147
Amh	anti-Mullerian hormone
Angpt1	angiopoietin 1
Angpt2	angiopoietin 2
Angpt4	angiopoietin 4
Angptl1	angiopoietin-like 1
Angptl2	angiopoietin-like 2
Angptl3	angiopoietin-like 3
Angptl4	angiopoietin-like 4
Angptl6	angiopoietin-like 6
Angptl7	angiopoietin-like 7
Areg	amphiregulin
Artn	artemin
Bdnf	brain derived neurotrophic factor
Bmp10	bone morphogenetic protein 10
Bmp15	bone morphogenetic protein 15
Bmp2	bone morphogenetic protein 2
Bmp3	bone morphogenetic protein 3
Bmp4	bone morphogenetic protein 4
Bmp5	bone morphogenetic protein 5
Bmp6	bone morphogenetic protein 6
Bmp7	bone morphogenetic protein 7
Bmp8a	bone morphogenetic protein 8a
Bmp8b	bone morphogenetic protein 8b
Brinp2	family with sequence similarity 5, member B
Brinp3	family with sequence similarity 5, member C
Btc	betacellulin, epidermal growth factor family member
Cbln1	cerebellin 1 precursor protein
Cbln2	cerebellin 2 precursor protein
Cbln3	cerebellin 3 precursor protein
Cbln4	cerebellin 4 precursor protein
Ccbe1	collagen and calcium binding EGF domains 1
Ccl1	chemokine (C-C motif) ligand 1
Ccl11	chemokine (C-C motif) ligand 11
Ccl12	chemokine (C-C motif) ligand 12
Ccl17	chemokine (C-C motif) ligand 17
Ccl19	chemokine (C-C motif) ligand 19
Ccl2	chemokine (C-C motif) ligand 2
Ccl20	chemokine (C-C motif) ligand 20
Ccl21a	chemokine (C-C motif) ligand 21A
Ccl21b	chemokine (C-C motif) ligand 21B
Ccl21c	chemokine (C-C motif) ligand 21C (leucine)
Ccl22	chemokine (C-C motif) ligand 22
Ccl24	chemokine (C-C motif) ligand 24
Ccl25	chemokine (C-C motif) ligand 25
Ccl26	chemokine (C-C motif) ligand 26
Ccl27a	chemokine (C-C motif) ligand 27A
Ccl28	chemokine (C-C motif) ligand 28
Ccl3	chemokine (C-C motif) ligand 3
Ccl4	chemokine (C-C motif) ligand 4
Ccl5	chemokine (C-C motif) ligand 5
Ccl6	chemokine (C-C motif) ligand 6
Ccl7	chemokine (C-C motif) ligand 7
Ccl8	chemokine (C-C motif) ligand 8
Ccl9	chemokine (C-C motif) ligand 9
Cfc1	cripto, FRL-1, cryptic family 1
Chrd	chordin
Chrdl1	chordin-like 1
Chrdl2	chordin-like 2
Clcf1	cardiotrophin-like cytokine factor 1
Cntf	ciliary neurotrophic factor
Crhbp	corticotropin releasing hormone binding protein
Crlf1	cytokine receptor-like factor 1
Crlf3	cytokine receptor-like factor 3
Crnn	cornulin
Csf1	colony stimulating factor 1 (macrophage)
Csf2	colony stimulating factor 2 (granulocyte-macrophage)
Csf3	colony stimulating factor 3 (granulocyte)
Ctf1	cardiotrophin 1
Ctf2	cardiotrophin 2
Cx3cl1	chemokine (C-X3-C motif) ligand 1
Cxcl1	chemokine (C-X-C motif) ligand 1
Cxcl10	chemokine (C-X-C motif) ligand 10
Cxcl11	chemokine (C-X-C motif) ligand 11
Cxcl12	chemokine (C-X-C motif) ligand 12
Cxcl13	chemokine (C-X-C motif) ligand 13
Cxcl14	chemokine (C-X-C motif) ligand 14
Cxcl15	chemokine (C-X-C motif) ligand 15
Cxcl2	chemokine (C-X-C motif) ligand 2
Cxcl3	chemokine (C-X-C motif) ligand 3
Cxcl5	chemokine (C-X-C motif) ligand 5
Cxcl9	chemokine (C-X-C motif) ligand 9
Dhh	desert hedgehog
Ebi3	Epstein-Barr virus induced gene 3
Eda	ectodysplasin-A
Egf	epidermal growth factor
Egfl6	EGF-like-domain, multiple 6
Egfl7	EGF-like domain 7
Egfl8	EGF-like domain 8
Epgn	epithelial mitogen
Epo	erythropoietin
Ereg	epiregulin
Fam132a	family with sequence similarity 132, member A
Fam132b	family with sequence similarity 132, member B
Fasl	Fas ligand (TNF superfamily, member 6)
Fgf1	fibroblast growth factor 1
Fgf10	fibroblast growth factor 10
Fgf11	fibroblast growth factor 11
Fgf12	fibroblast growth factor 12
Fgf13	fibroblast growth factor 13
Fgf14	fibroblast growth factor 14
Fgf15	fibroblast growth factor 15
Fgf16	fibroblast growth factor 16
Fgf17	fibroblast growth factor 17
Fgf18	fibroblast growth factor 18
Fgf2	fibroblast growth factor 2
Fgf20	fibroblast growth factor 20
Fgf21	fibroblast growth factor 21
Fgf22	fibroblast growth factor 22
Fgf23	fibroblast growth factor 23
Fgf3	fibroblast growth factor 3
Fgf4	fibroblast growth factor 4
Fgf5	fibroblast growth factor 5
Fgf6	fibroblast growth factor 6
Fgf7	fibroblast growth factor 7
Fgf8	fibroblast growth factor 8
Fgf9	fibroblast growth factor 9
Fgfbp1	fibroblast growth factor binding protein 1
Fgfbp3	fibroblast growth factor binding protein 3
Figf	c-fos induced growth factor
Flg	filaggrin
Flg2	filaggrin family member 2
Flt3l	FMS-like tyrosine kinase 3 ligand
Frzb	frizzled-related protein
Fst	follistatin
Fstl1	follistatin-like 1
Fstl3	follistatin-like 3
Gdf1	growth differentiation factor 1
Gdf10	growth differentiation factor 10
Gdf11	growth differentiation factor 11
Gdf15	growth differentiation factor 15
Gdf2	growth differentiation factor 2
Gdf3	growth differentiation factor 3
Gdf5	growth differentiation factor 5
Gdf6	growth differentiation factor 6
Gdf7	growth differentiation factor 7
Gdf9	growth differentiation factor 9
Gdnf	glial cell line derived neurotrophic factor
Gh	growth hormone
Gm13271	predicted gene 13271
Gm13272	predicted gene 13272
Gm13275	predicted gene 13275
Gm13276	predicted gene 13276
Gm13277	predicted gene 13277
Gm13278	predicted gene 13278
Gm13279	predicted gene 13279
Gm13283	predicted gene 13283
Gm13285	predicted gene 13285
Gm13287	predicted gene 13287
Gm13288	predicted gene 13288
Gm13289	predicted gene 13289
Gm13290	predicted gene 13290
Gm13306	predicted gene 13306
Gm5849	predicted gene 5849
Hbegf	heparin-binding EGF-like growth factor
Hcfc1	host cell factor C1
Hcfc2	host cell factor C2
Hgf	hepatocyte growth factor
Hgfac	hepatocyte growth factor activator
Hhip	Hedgehog-interacting protein
Hrnr	hornerin
Ifna1	interferon alpha 1
Ifna11	interferon alpha 11
Ifna12	interferon alpha 12
Ifna13	interferon alpha 13
Ifna14	interferon, alpha 14
Ifna15	predicted gene 12597
Ifna16	predicted gene 13280
Ifna2	interferon alpha 2
Ifna4	interferon alpha 4
Ifna5	interferon alpha 5
Ifna6	interferon alpha 6
Ifna7	interferon alpha 7
Ifna9	interferon alpha 9
Ifnab	interferon alpha B
Ifnb1	interferon beta 1, fibroblast
Ifne	interferon epsilon
Ifng	interferon gamma
Ifnk	interferon kappa
Ifnz	interferon zeta
Igf1	insulin-like growth factor 1
Igf2	insulin-like growth factor 2
Ihh	Indian hedgehog
Il10	interleukin 10
Il11	interleukin 11
Il12a	interleukin 12a
Il12b	interleukin 12b
Il13	interleukin 13
Il15	interleukin 15
Il16	interleukin 16
Il17a	interleukin 17A
Il17b	interleukin 17B
Il17c	interleukin 17C
Il17d	interleukin 17D
Il17f	interleukin 17F
Il18	interleukin 18
Il19	interleukin 19
Il1a	interleukin 1 alpha
Il1b	interleukin 1 beta
Il1f10	interleukin 1 family, member 10
Il1f5	interleukin 1 family, member 5 (delta)
Il1f6	interleukin 1 family, member 6
Il1f8	interleukin 1 family, member 8
Il1f9	interleukin 1 family, member 9
Il1rn	interleukin 1 receptor antagonist
Il2	interleukin 2
Il20	interleukin 20
Il22	interleukin 22
Il23a	interleukin 23, alpha subunit p19
Il24	interleukin 24
Il25	interleukin 25
Il3	interleukin 3
Il34	interleukin 34
Il4	interleukin 4
Il5	interleukin 5
Il6	interleukin 6
Il7	interleukin 7
Il9	interleukin 9
Inha	inhibin alpha
Inhba	inhibin beta-A
Inhbb	inhibin beta-B
Inhbc	inhibin beta-C
Inhbe	inhibin beta E
Ins1	insulin I
Ins2	insulin II
Insl3	insulin-like 3
Insl5	insulin-like 5
Insl6	insulin-like 6
Ism1	isthmin 1 homolog (zebrafish)
Ism2	isthmin 2 homolog (zebrafish)
Kitl	kit ligand
Lefty1	left right determination factor 1
Lefty2	left-right determination factor 2
Lep	leptin
Lif	leukemia inhibitory factor
Lta	lymphotoxin A
Ltb	lymphotoxin B
Mdk	midkine
Megf10	multiple EGF-like-domains 10
Megf11	multiple EGF-like-domains 11
Megf6	multiple EGF-like-domains 6
Megf8	multiple EGF-like-domains 8
Megf9	multiple EGF-like-domains 9
Mst1	macrophage stimulating 1 (hepatocyte growth factor-like)
Mstn	myostatin
Ngf	nerve growth factor
Nodal	nodal
Nrg1	neuregulin 1
Nrg2	neuregulin 2
Nrg3	neuregulin 3
Nrg4	neuregulin 4
Nrtn	neurturin
Ntf3	neurotrophin 3
Ntf5	neurotrophin 5
Osm	oncostatin M
Pdgfa	platelet derived growth factor, alpha
Pdgfb	platelet derived growth factor, B polypeptide
Pdgfc	platelet-derived growth factor, C polypeptide
Pdgfd	platelet-derived growth factor, D polypeptide
Pf4	platelet factor 4
Pgf	placental growth factor
Pik3ip1	phosphoinositide-3-kinase interacting protein 1
Ppbp	pro-platelet basic protein
Prl	prolactin
Prl2a1	prolactin family 2, subfamily a, member 1
Prl2b1	prolactin family 2, subfamily b, member 1
Prl2c1	Prolactin family 2, subfamily c, member 1
Prl2c2	prolactin family 2, subfamily c, member 2
Prl2c3	prolactin family 2, subfamily c, member 3
Prl2c4	prolactin family 2, subfamily c, member 4
Prl2c5	prolactin family 2, subfamily c, member 5
Prl3a1	prolactin family 3, subfamily a, member 1
Prl3b1	prolactin family 3, subfamily b, member 1
Prl3c1	prolactin family 3, subfamily c, member 1
Prl3d1	prolactin family 3, subfamily d, member 1
Prl3d2	prolactin family 3, subfamily d, member 1
Prl3d3	prolactin family 3, subfamily d, member 3
Prl4a1	prolactin family 4, subfamily a, member 1
Prl5a1	prolactin family 5, subfamily a, member 1
Prl6a1	prolactin family 6, subfamily a, member 1
Prl7a1	prolactin family 7, subfamily a, member 1
Prl7a2	prolactin family 7, subfamily a, member 2
Prl7b1	prolactin family 7, subfamily b, member 1
Prl7c1	prolactin family 7, subfamily c, member 1
Prl7d1	prolactin family 7, subfamily d, member 1
Prl8a1	prolactin family 8, subfamily a, member 1
Prl8a2	prolactin family 8, subfamily a, member 2
Prl8a6	prolactin family 8, subfamily a, member 6
Prl8a8	prolactin family 8, subfamily a, member 81
Prl8a9	prolactin family8, subfamily a, member 9
Pspn	persephin
Ptn	pleiotrophin
Rptn	repetin
S100a1	S100 calcium binding protein A1
S100a10	S100 calcium binding protein A10 (calpactin)
S100a11	S100 calcium binding protein A11 (calgizzarin)
S100a13	S100 calcium binding protein A13
S100a14	S100 calcium binding protein A14
S100a16	S100 calcium binding protein A16
S100a2	S100 calcium binding protein A2
S100a3	S100 calcium binding protein A3
S100a4	S100 calcium binding protein A4
S100a5	S100 calcium binding protein A5
S100a6	S100 calcium binding protein A6 (calcyclin)
S100a7a	S100 calcium binding protein A7A
S100a8	S100 calcium binding protein A8 (calgranulin A)
S100a9	S100 calcium binding protein A9 (calgranulin B)
S100b	S100 protein, beta polypeptide, neural
S100g	S100 calcium binding protein G
S100z	S100 calcium binding protein, zeta
Scube1	signal peptide, CUB domain, EGF-like 1
Scube2	signal peptide, CUB domain, EGF-like 2
Scube3	signal peptide, CUB domain, EGF-like 3
Sfrp1	secreted frizzled-related protein 1
Sfrp2	secreted frizzled-related protein 2
Sfrp4	secreted frizzled-related protein 4
Sfrp5	secreted frizzled-related sequence protein 5
Shh	sonic hedgehog
Tchh	trichohyalin
Tchhl1	trichohyalin-like 1
Tdgf1	teratocarcinoma-derived growth factor 1
Tgfa	transforming growth factor alpha
Tgfb1	transforming growth factor, beta 1
Tgfb2	transforming growth factor, beta 2
Tgfb3	transforming growth factor, beta 3
Thpo	thrombopoietin
Tnf	tumor necrosis factor
Tnfsf10	tumor necrosis factor (ligand) superfamily, member 10
Tnfsf11	tumor necrosis factor (ligand) superfamily, member 11
Tnfsf12	tumor necrosis factor (ligand) superfamily, member 12
Tnfsf12tnfsf13	cDNA sequence BC096441
Tnfsf13	tumor necrosis factor (ligand) superfamily, member 13
Tnfsf13b	tumor necrosis factor (ligand) superfamily, member 13b
Tnfsf14	tumor necrosis factor (ligand) superfamily, member 14
Tnfsf15	tumor necrosis factor (ligand) superfamily, member 15
Tnfsf18	tumor necrosis factor (ligand) superfamily, member 18
Tnfsf4	tumor necrosis factor (ligand) superfamily, member 4
Tnfsf8	tumor necrosis factor (ligand) superfamily, member 8
Tnfsf9	tumor necrosis factor (ligand) superfamily, member 9
Tpo	thyroid peroxidase
Vegfa	vascular endothelial growth factor A
Vegfb	vascular endothelial growth factor B
Vegfc	vascular endothelial growth factor C
Vwc2	von Willebrand factor C domain containing 2
Vwc2l	von Willebrand factor C domain-containing protein 2-like
Wfikkn1	WAP, FS, Ig, KU, and NTR-containing protein 1
Wfikkn2	WAP, follistatin/kazal, immunoglobulin, kunitz and netrin domain containing 2
Wif1	Wnt inhibitory factor 1
Wnt1	wingless-related MMTV integration site 1
Wnt10a	wingless related MMTV integration site 10a
Wnt10b	wingless related MMTV integration site 10b
Wnt11	wingless-related MMTV integration site 11
Wnt16	wingless-related MMTV integration site 16
Wnt2	wingless-related MMTV integration site 2
Wnt2b	wingless related MMTV integration site 2b
Wnt3	wingless-related MMTV integration site 3
Wnt3a	wingless-related MMTV integration site 3A
Wnt4	wingless-related MMTV integration site 4
Wnt5a	wingless-related MMTV integration site 5A
Wnt5b	wingless-related MMTV integration site 5B
Wnt6	wingless-related MMTV integration site 6
Wnt7a	wingless-related MMTV integration site 7A
Wnt7b	wingless-related MMTV integration site 7B
Wnt8a	wingless-related MMTV integration site 8A
Wnt8b	wingless related MMTV integration site 8b
Wnt9a	wingless-type MMTV integration site 9A
Wnt9b	wingless-type MMTV integration site 9B
Xcl1	chemokine (C motif) ligand 1
1110031I02Rik	RIKEN cDNA 1110031I02 gene
Ccl16-ps	chemokine (C-C motif) ligand 16, pseudogene
E030019B13Rik	RIKEN cDNA E030019B13 gene
Gm13286	predicted gene 13286
Gm13308	predicted gene 13308
Gm5065	predicted gene 5065
Gm8080	predicted gene 8080
Ifna10	interferon alpha 10
Itih5l-ps	inter-alpha (globulin) inhibitor H5-like
Muc12	mucin 12
Serpina3h	serine (or cysteine) peptidase inhibitor, clade A, member 3H
Serpina4-ps1	serine (or cysteine) peptidase inhibitor, clade A, member 4, pseudogene 1
Tnxa	tenascin XA
Zfp91-Cntf	Zfp91-Cntf readthrough transcript
Zp4-ps	zona pellucida glycoprotein 4, pseudogene

## Sheet: 2. GAG genes d7 vs d14
Preparation of Linkage region
Gene symbol	Gene_Name	function	day 7 fold change	Adjusted_p-value	day 14 fold change	Adjusted_p-value2
B3galt6	UDP-Gal:betaGal beta 1,3-galactosyltransferase, polypeptide 6	Transferring UDP‐galactose to galactose‐xylose on proteoglycan	-1.04726	0.730648	-0.0138629	0.956719
B4galt7	xylosylprotein beta1,4-galactosyltransferase, polypeptide 7 (galactosyltransferase I)	Transferring UDP‐galactose to xylose on proteoglycan	1.542	0.000295778	-0.0504792	0.797715
B3gat3	beta-1,3-glucuronyltransferase 3 (glucuronosyltransferase I)	Transferring UDP‐GlcA to galactose‐galactose‐xylose on proteoglycan	1.23135	0.103866	0.133834	0.555075
B4galt2	UDP-Gal:betaGlcNAc beta 1,4- galactosyltransferase, polypeptide 2	Transfering UDP‐galactose to GlcNAc, Glc, and Xyl.	4.87947	1.81764e-07	1.62519	2.51682e-05
B3gat1		Transferring UDP‐GlcA to galactose‐galactose‐xylose on proteoglycan
B3gat2		Transferring UDP‐GlcA to galactose‐galactose‐xylose on proteoglycan
Xylt1		Transferring UDP‐xylose to proteoglycan
Xylt2		Transferring UDP‐xylose to proteoglycan
Glycosaminoglycan chain polimerisation
Gene symbol	Gene_Name	function	day 7 fold change	Adjusted_p-value	day 14 fold change	Adjusted_p-value2
Has1	hyaluronan synthase1	Polymerisation of hyaluronic acid	11.1884	0.00016328	-0.467161	0.713571
Csgalnact1	chondroitin sulfate N-acetylgalactosaminyltransferase 1	Transferring UDP‐GalNAc to GlcA at end of sugar chain (CS)	1.21528	0.234969	0.284795	0.295113
Extl3	exostoses (multiple)-like 3	Transferring UDP‐GlcA to GlcNAc at end of sugar chain (HS)	-1.48557	0.00873779	-0.263496	0.251823
Chsy3	chondroitin sulfate synthase 3	Transferring UDP‐GlcA to GalNAc at end of sugar chain (CS)	4.04921	7.99733e-07	0.789747	0.0113678
Extl1	exostoses (multiple)-like 1	Transferring UDP‐GlcA to GlcNAc at end of sugar chain (HS)	-12.7266	7.93853e-08	-0.959727	0.00112942
Ext1	exostoses (multiple) 1	Transferring UDP‐GlcNAc to GlcA at end of sugar chain (HS)	3.14054	3.56337e-08	0.621797	0.00104616
Extl2	exostoses (multiple)-like 2	Transferring UDP‐GlcA to GlcNAc at end of sugar chain (HS)	1.63797	0.000293371	0.677062	0.00100963
Has3	hyaluronan synthase 3	Polymerisation of hyaluronic acid	8.51159	1.73771e-06	1.82025	0.000985343
Has2	hyaluronan synthase 2	Polymerisation of hyaluronic acid	10.4286	1.00836e-07	1.80379	0.000200698
Chsy1	chondroitin sulfate synthase 1	Transferring UDP‐GlcA to GalNAc at end of sugar chain (CS)	2.34728	1.5552e-06	0.846909	0.000197775
Ext2	exostoses (multiple) 2	Transferring UDP‐GlcNAc to GlcA at end of sugar chain (HS)	2.21362	4.8358e-07	0.762098	9.36008e-05
Chpf	chondroitin polymerizing factor	Transferring UDP‐GlcA to GalNAc at end of sugar chain (CS)	1.9769	1.97917e-05	0.992781	5.76414e-05
Csgalnact2		Transferring UDP‐GalNAc to GlcA at end of sugar chain (CS)
Glycsaminoglycan chain modification
Gene symbol	Gene_Name	function	day 7 fold change	Adjusted_p-value	day 14 fold change	Adjusted_p-value2
Glce	glucuronyl C5-epimerase	pimerisation of GlcA unit into iduronic acid unit (IdoA) (HS)	-1.04675	0.686632	0.0122406	0.95559
Hs3st1	heparan sulfate (glucosamine) 3-O-sulfotransferase 1	Sulfation at the 3‐O position of GlcNAc and GlcNS units sulfated at the 6‐O position (HS)	1.16623	0.573789	-0.136313	0.793315
Ndst3	N-deacetylase/N-sulfotransferase (heparan glucosaminyl) 3	N‐de‐acetylation and N‐sulfation of GlcNAc unit (HS)	1.21494	0.226707	-0.101301	0.741694
Chst3	carbohydrate (chondroitin 6/keratan) sulfotransferase 3	Sulfation at the 6‐O postion of GalNAc untis (CS)	1.20487	0.181622	-0.110371	0.668947
Ndst2	N-deacetylase/N-sulfotransferase (heparan glucosaminyl) 2	N‐de‐acetylation and N‐sulfation of GlcNAc unit (HS)	1.10764	0.545558	0.290213	0.280601
Chst7	carbohydrate (N-acetylglucosamino) sulfotransferase 7	Sulfation at the 6‐O postion of GalNAc untis (CS)	-1.28882	0.116945	-0.347722	0.182548
Hs3st3a1	heparan sulfate (glucosamine) 3-O-sulfotransferase 3A1	Sulfation at the 3‐O position of GlcNAc and GlcNS units sulfated at the 6‐O position (HS)	1.477	0.322902	-1.08039	0.161777
Hs6st1	heparan sulfate 6-O-sulfotransferase 1	Sulfation at the 6‐O position of GlcNAc and N‐sulfated‐glucuronic acid units (GlcNS) (HS)	-1.0492	0.666881	0.249712	0.139429
Sumf1	sulfatase modifying factor 1	Cofactor for Sulf1 and Sulf 2 (HS)	1.25579	0.015794	0.257909	0.0782494
Chst15	carbohydrate (N-acetylgalactosamine 4-sulfate 6-O) sulfotransferase 15	Sulfation at the 6‐O postion of GalNAc untis (CS)	-1.94835	9.75197e-06	-0.292335	0.0754725
Hs6st2	heparan sulfate 6-O-sulfotransferase 2	Sulfation at the 6‐O position of GlcNAc and GlcNS units (HS)	-1.21788	0.466864	0.753468	0.050626
Hs3st6	heparan sulfate (glucosamine) 3-O-sulfotransferase 6	Sulfation at the 3‐O position of GlcNAc and GlcNS units sulfated at the 6‐O position (HS)	-1.75615	0.00230677	-0.53058	0.0404673
Sumf2	sulfatase modifying factor 2	Cofactor for Sulf1 and Sulf 2 (HS)	-1.45899	0.0025096	-0.432881	0.0185777
Chst12	carbohydrate sulfotransferase 12	Sulfation at the 4‐O postion of GalNAc untis (CS)	2.39843	4.97904e-07	0.512554	0.00549558
Ndst1	N-deacetylase/N-sulfotransferase (heparan glucosaminyl) 1	N‐de‐acetylation and N‐sulfation of GlcNAc unit (HS)	1.1759	0.142967	0.609736	0.00191577
Hs3st3b1	heparan sulfate (glucosamine) 3-O-sulfotransferase 3B1	Sulfation at the 3‐O position of GlcNAc and GlcNS units sulfated at the 6‐O position (HS)	-1.03815	0.79769	-0.789798	0.00182177
Chst11	carbohydrate sulfotransferase 11	Sulfation at the 4‐O postion of GalNAc untis (CS)	3.97331	3.00555e-07	1.01275	0.000737903
Chst2	carbohydrate sulfotransferase 2	Sulfation at the 6‐O postion of GalNAc untis (CS)	2.78082	2.35444e-05	1.37386	0.000139236
Chst14	carbohydrate (N-acetylgalactosamine 4-0) sulfotransferase 14	Sulfation at the 4‐O postion of GalNAc untis (CS)	2.55305	2.20539e-06	1.24683	2.03714e-05
Hs2st1	heparan sulfate 2-O-sulfotransferase 1	Sulfation at the 2‐O position of GlcA and IdoA units (HS)	1.79714	6.63265e-06	0.904037	1.35931e-05
Sulf1	sulfatase 1	Desulfation of the 6‐O positon of 6‐O sulfated GlcNAc and GlcNS units (HS)	9.98148	3.34837e-10	1.61891	8.23434e-07
Sulf2	sulfatase 2	Desulfation of the 6‐O positon of 6‐O sulfated GlcNAc and GlcNS units (HS)	3.2977	9.98617e-08	1.92434	1.84428e-07
Chst13		Sulfation at the 4‐O postion of GalNAc untis (CS)
Chst4		Sulfation at the 6‐O postion of GalNAc untis (CS)
Chst5		Sulfation at the 6‐O postion of GalNAc untis (CS)
Chst8		Sulfation at the 4‐O postion of GalNAc untis (CS)
Chst9		Sulfation at the 4‐O postion of GalNAc untis (CS)
Dse		Epimerisation of GlcA unit into iduronic acid unit (IdoA) (CS)
Hs3st2		Sulfation at the 3‐O position of GlcNAc and GlcNS units sulfated at the 6‐O position (HS)
Hs6st3		Sulfation at the 6‐O position of GlcNAc and GlcNS units (HS)
Ndst4		N‐de‐acetylation and N‐sulfation of GlcNAc unit (HS)
Ust		Sulfation at the 2‐O position of GlcA and IdoA units (CS)
Glycosaminoglycan chain degradation
Gene symbol	Gene_Name	function	day 7 fold change	Adjusted_p-value	day 14 fold change	Adjusted_p-value2
Idua	iduronidase, alpha-L-	Hydrolysation of IdoA unit from sugar chain (HS and CS)	1.05334	0.762614	0.0389063	0.901666
Galns	galactosamine (N-acetyl)-6-sulfate sulfatase	Desulfation of the 6‐O positon of 6‐O sulfated GalNAc units (CS)	1.3809	0.00100012	0.0653998	0.677019
Hyal3	hyaluronoglucosaminidase 3	Degradation of hyaluronic acid chain	1.03826	0.872004	-0.167115	0.67091
Arsk	arylsulfatase K	Desulfation of proteoglycans, paralog of IDS	-1.12509	0.339353	0.120455	0.574746
Hyal2	hyaluronoglucosaminidase 2	Degradation of hyaluronic acid chain	1.75293	1.62303e-05	0.123264	0.457902
Mgea5	meningioma expressed antigen 5 (hyaluronidase)	Degradation of hyaluronic acid chain	1.17491	0.073683	0.136511	0.364691
Naga	N-acetyl galactosaminidase, alpha	Hydrolysis N‐GalNAc moieties from glycoconjugates.	1.61538	0.00051345	0.19174	0.338071
Hyal1	hyaluronoglucosaminidase 1	Degradation of hyaluronic acid chain	1.51981	0.00114625	-0.28926	0.135755
Hpse	heparanase	Degradation of HS chains extracellularly	1.37781	0.0164147	-0.403455	0.0571627
Sgsh	N-sulfoglucosamine sulfohydrolase (sulfamidase)	Desulfation of GlcNS units (HS)	1.31908	0.0138193	0.356478	0.0411366
Naglu	alpha-N-acetylglucosaminidase (Sanfilippo disease IIIB)	Hydrolysation of GlcNAc from sugar chain (HS)	1.10294	0.403102	0.430928	0.0217677
Arsj	arylsulfatase J	Desulfation of the 4‐O position of 4‐O sulfated GalNAc units (CS)	2.51661	4.14192e-05	1.10156	0.000640034
Hexb	hexosaminidase B	Hydrolysation of GalNAc units (CS) and GlcNAc untis (hyaluronic acid) from sugar chain	1.63097	7.63917e-05	0.735715	0.000150183
Hexa	hexosaminidase A	Hydrolysation of GalNAc units (CS) and GlcNAc untis (hyaluronic acid) from sugar chain	3.15133	2.47555e-07	1.26763	1.57981e-05
Gusb	glucuronidase, beta	Hydrolysation of GlcA from sugar chain (HS and Hyaluronic acid and CS)	4.12358	2.75854e-08	1.39616	5.26757e-06
Arsb	arylsulfatase B	Desulfation of the 4‐O position of 4‐O sulfated GalNAc units (CS)	2.94685	3.02299e-07	1.79015	3.91766e-07
Gns		Desulfation of the 6‐O positon of 6‐O sulfated GlcNAc and GlcNS units (HS)
Hgsnat		Acetylation of desulfated GlcNS units (HS)
Ids		Desulfation of 2‐O sulfated IdoA and GlcA units (HS and CS)
