# Supplementary material for: Matrisomal components involved in regenerative wound healing in axolotl and Acomys: implications for biomaterial development
Source: Royal Society of Chemistry journal article supplement (doi:10.1039/d3bm00835e), 2023-01-01
Supplement: d3bm00835e6.xlsx [file d3bm00835e6.xlsx]

## Sheet: 1. matrisome and GAG matches
Gene		FW3/FW1	fold change Day 7 vs Day 0		Core matrisome - collagens	Gene Name	fold change		Core matrisome - ECM glycoproteins	Gene Name	fold change		Core matrisome - Proteoglycans	Gene Name	fold change		Matrisome associated - ECM affiliated	Gene Name	fold change		Matrisome associated - secreted factors	Gene Name	fold change		Matrisome associated - regulators	Gene Name	fold change			Preparation of Linkage region	Gene Name	fold change		Glycosaminoglycan chain polimerisation	Gene Name	fold change		Glycsaminoglycan chain modification	Gene Name	fold change		Glycosaminoglycan chain degradation	Gene Name	fold change
KAZALD1			241.9		Col4a6	collagen, type IV, alpha 6	2.98		Abi3bp	ABI gene family, member 3 (NESH) binding protein	-40.36		Ogn	osteoglycin	-5.96		Lgals8	lectin, galactose binding, soluble 8	-646.36		Chrdl1	chordin-like 1	-4.66		Ctss	cathepsin S	-3.3			B3galt6	Transferring UDP‐galactose to galactose‐xylose on proteoglycan	#N/A		Chpf	Transferring UDP‐GlcA to GalNAc at end of sugar chain (CS)	#N/A		Chst11	Sulfation at the 4‐O postion of GalNAc untis (CS)	2.15		Arsb	Desulfation of the 4‐O position of 4‐O sulfated GalNAc units (CS)	#N/A
			148.38		Col5a2	collagen, type V, alpha 2	3.92		Zpld1	zona pellucida like domain containing 1	-9.03		Dcn	decorin	2.09		Lgals3	lectin, galactose binding, soluble 3	-538.23		Il1b	interleukin 1 beta	-2.26		F10	coagulation factor X	-2.34			B3gat1	Transferring UDP‐GlcA to galactose‐galactose‐xylose on proteoglycan	#N/A		Chsy1	Transferring UDP‐GlcA to GalNAc at end of sugar chain (CS)	#N/A		Sulf1	Desulfation of the 6‐O positon of 6‐O sulfated GlcNAc and GlcNS units (HS)	15.21		Arsj	Desulfation of the 4‐O position of 4‐O sulfated GalNAc units (CS)	#N/A
			119.68		Col3a1	collagen, type III, alpha 1	4.27		Dmbt1	deleted in malignant brain tumors 1	-5.69		Epyc	epiphycan	2.2		Clec3b	C-type lectin domain family 3, member b	-9.29		Fgf12	fibroblast growth factor 12	-2.03		Ctsg	cathepsin G	-2.07			B3gat2	Transferring UDP‐GlcA to galactose‐galactose‐xylose on proteoglycan	#N/A		Chsy3	Transferring UDP‐GlcA to GalNAc at end of sugar chain (CS)	#N/A		Chst2	Sulfation at the 6‐O postion of GalNAc untis (CS)	17.97		Arsk	Desulfation of proteoglycans, paralog of IDS	#N/A
MMP1			110.45		Col17a1	collagen, type XVII, alpha 1	4.38		Mmrn1	multimerin 1	-5.65		Bcan	brevican	2.48		Lgals1	lectin, galactose binding, soluble 1	-4.59		S100a10	S100 calcium binding protein A10 (calpactin)	2.21		Cstb	cystatin B	2.01			B3gat3	Transferring UDP‐GlcA to galactose‐galactose‐xylose on proteoglycan	#N/A		Csgalnact1	Transferring UDP‐GalNAc to GlcA at end of sugar chain (CS)	#N/A		Chst12	Sulfation at the 4‐O postion of GalNAc untis (CS)	#N/A		Galns	Desulfation of the 6‐O positon of 6‐O sulfated GalNAc units (CS)	#N/A
Gene symbol			83.85		Col5a1	collagen, type V, alpha 1	4.73		Fbn1	fibrillin 1	-5.53		Srgn	serglycin	2.8		Muc2	mucin 2	-4.11		Ntf3	neurotrophin 3	2.36		Htra3	HtrA serine peptidase 3	2.11			B4galt2	Transfering UDP‐galactose to GlcNAc, Glc, and Xyl.	#N/A		Csgalnact2	Transferring UDP‐GalNAc to GlcA at end of sugar chain (CS)	#N/A		Chst13	Sulfation at the 4‐O postion of GalNAc untis (CS)	#N/A		Gns	Desulfation of the 6‐O positon of 6‐O sulfated GlcNAc and GlcNS units (HS)	#N/A
			69.92		Col24a1	collagen, type XXIV, alpha 1	4.85		Adipoq	adiponectin, C1Q and collagen domain containing	-5.05		Prg3	proteoglycan 3	3.16		Elfn1	leucine rich repeat and fibronectin type III, extracellular 1	-3.23		Tnfsf10	tumor necrosis factor (ligand) superfamily, member 10	2.56		Adamts12	a disintegrin-like and metallopeptidase (reprolysin type) with thrombospondin type 1 motif, 12	2.12			B4galt7	Transferring UDP‐galactose to xylose on proteoglycan	#N/A		Ext1	Transferring UDP‐GlcNAc to GlcA at end of sugar chain (HS)	#N/A		Chst14	Sulfation at the 4‐O postion of GalNAc untis (CS)	#N/A		Gusb	Hydrolysation of GlcA from sugar chain (HS and Hyaluronic acid and CS)	#N/A
PAMR1			67.96		Col12a1	collagen, type XII, alpha 1	5.84		Pcolce	procollagen C-endopeptidase enhancer protein	-4.46		Kera	keratocan	3.26		C1qtnf2	C1q and tumor necrosis factor related protein 2	-3.12		Vwc2l	von Willebrand factor C domain-containing protein 2-like	2.79		Ctsb	cathepsin B	2.13			Xylt1	Transferring UDP‐xylose to proteoglycan	#N/A		Ext2	Transferring UDP‐GlcNAc to GlcA at end of sugar chain (HS)	#N/A		Chst15	Sulfation at the 6‐O postion of GalNAc untis (CS)	#N/A		Hexa	Hydrolysation of GalNAc units (CS) and GlcNAc untis (hyaluronic acid) from sugar chain	#N/A
HMGCS2			66.75		Col4a5	collagen, type IV, alpha 5	8.68		Spon2	spondin 2, extracellular matrix protein	-3.91		Prg4	proteoglycan 4 (megakaryocyte stimulating factor, articular superficial zone protein)	4.14		Cspg5	chondroitin sulfate proteoglycan 5	-2.08		Fstl1	follistatin-like 1	3.54		Cd109	CD109 antigen	2.13			Xylt2	Transferring UDP‐xylose to proteoglycan	#N/A		Extl1	Transferring UDP‐GlcA to GlcNAc at end of sugar chain (HS)	#N/A		Chst3	Sulfation at the 6‐O postion of GalNAc untis (CS)	#N/A		Hexb	Hydrolysation of GalNAc units (CS) and GlcNAc untis (hyaluronic acid) from sugar chain	#N/A
PLBD1			61.74		Col28a1	collagen, type XXVIII, alpha 1	32.45		Tnxb	tenascin XB	-3.2		Esm1	endothelial cell-specific molecule 1	4.3		Muc4	mucin 4	-2.05		Sfrp2	secreted frizzled-related protein 2	5.39		P4ha2	procollagen-proline, 2-oxoglutarate 4-dioxygenase (proline 4-hydroxylase), alpha II polypeptide	2.14							Extl2	Transferring UDP‐GlcA to GlcNAc at end of sugar chain (HS)	#N/A		Chst4	Sulfation at the 6‐O postion of GalNAc untis (CS)	#N/A		Hgsnat	Acetylation of desulfated GlcNS units (HS)	#N/A
TNC			58.6		Col7a1	collagen, type VII, alpha 1	36.69		Reln	reelin	-2.51		Lum	lumican	#N/A		Sdc1	syndecan 1	2.08		Angptl2	angiopoietin-like 2	5.43		Plod1	procollagen-lysine, 2-oxoglutarate 5-dioxygenase 1	2.23							Extl3	Transferring UDP‐GlcA to GlcNAc at end of sugar chain (HS)	#N/A		Chst5	Sulfation at the 6‐O postion of GalNAc untis (CS)	#N/A		Hpse	Degradation of HS chains extracellularly	#N/A
F13B			45.86		Col11a1	collagen, type XI, alpha 1	5.18		Tecta	tectorin alpha	-2.17		Hapln3	hyaluronan and proteoglycan link protein 3	#N/A		C1qc	complement component 1, q subcomponent, C chain	2.22		Figf	c-fos induced growth factor	6.52		Mmp28	matrix metallopeptidase 28 (epilysin)	2.51							Has1	Polymerisation of hyaluronic acid	#N/A		Chst7	Sulfation at the 6‐O postion of GalNAc untis (CS)	#N/A		Hyal1	Degradation of hyaluronic acid chain	#N/A
KRT17			43.45		Col6a3	collagen, type VI, alpha 3	#N/A		Igfals	insulin-like growth factor binding protein, acid labile subunit	-2.14		Hspg2	perlecan (heparan sulfate proteoglycan 2)	#N/A		Gpc4	glypican 4	2.3		Sfrp4	secreted frizzled-related protein 4	9.19		Serpine2	serine (or cysteine) peptidase inhibitor, clade E, member 2	3.08							Has2	Polymerisation of hyaluronic acid	#N/A		Chst8	Sulfation at the 4‐O postion of GalNAc untis (CS)	#N/A		Hyal2	Degradation of hyaluronic acid chain	#N/A
FN1			39.7		Col6a2	collagen, type VI, alpha 2	#N/A		Pcolce2	procollagen C-endopeptidase enhancer 2	2.06		Prg2	proteoglycan 2, bone marrow	#N/A		C1qtnf5	C1q and tumor necrosis factor related protein 5	2.43		S100a4	S100 calcium binding protein A4	#N/A		Bmp1	bone morphogenetic protein 1	3.17							Has3	Polymerisation of hyaluronic acid	#N/A		Chst9	Sulfation at the 4‐O postion of GalNAc untis (CS)	#N/A		Hyal3	Degradation of hyaluronic acid chain	#N/A
SALL4			39.56		Col6a1	collagen, type VI, alpha 1	#N/A		Wisp1	WNT1 inducible signaling pathway protein 1	2.38		Acan	aggrecan	#N/A		Anxa2	annexin A2	2.44		Tchh	trichohyalin	#N/A		Astl	astacin-like metalloendopeptidase (M12 family)	3.37											Dse	Epimerisation of GlcA unit into iduronic acid unit (IdoA) (CS)	#N/A		Ids	Desulfation of 2‐O sulfated IdoA and GlcA units (HS and CS)	#N/A
COL7A1			36.69		Col4a2	collagen, type IV, alpha 2	#N/A		Thbs4	thrombospondin 4	2.51		Bgn	biglycan	#N/A		Anxa1	annexin A1	2.55		Il17b	interleukin 17B	#N/A		Timp1	tissue inhibitor of metalloproteinase 1	3.37											Glce	pimerisation of GlcA unit into iduronic acid unit (IdoA) (HS)	#N/A		Idua	Hydrolysation of IdoA unit from sugar chain (HS and CS)	#N/A
COL28A1			32.45		Col1a1	collagen, type I, alpha 1	#N/A		Srpx2	sushi-repeat-containing protein, X-linked 2	2.86		Aspn	asporin	#N/A		Plxnb2	plexin B2	2.82		Tnfsf12	tumor necrosis factor (ligand) superfamily, member 12	#N/A		Tll1	tolloid-like	3.76											Hs2st1	Sulfation at the 2‐O position of GlcA and IdoA units (HS)	#N/A		Mgea5	Degradation of hyaluronic acid chain	#N/A
			30.14		Col4a1	collagen, type IV, alpha 1	#N/A		Matn2	matrilin 2	2.91		Chad	chondroadherin	#N/A		Plxnd1	plexin D1	2.86		Btc	betacellulin, epidermal growth factor family member	#N/A		Serpinh1	serine (or cysteine) peptidase inhibitor, clade H, member 1	3.82											Hs3st1	Sulfation at the 3‐O position of GlcNAc and GlcNS units sulfated at the 6‐O position (HS)	#N/A		Naga	Hydrolysis N‐GalNAc moieties from glycoconjugates.	#N/A
			29.76		Col1a2	collagen, type I, alpha 2	#N/A		Emilin2	elastin microfibril interfacer 2	3.39		Chadl	chondroadherin-like	#N/A		C1qb	complement component 1, q subcomponent, beta polypeptide	2.87		Egfl7	EGF-like domain 7	#N/A		Serpinb10	serine (or cysteine) peptidase inhibitor, clade B (ovalbumin), member 10	4.34											Hs3st2	Sulfation at the 3‐O position of GlcNAc and GlcNS units sulfated at the 6‐O position (HS)	#N/A		Naglu	Hydrolysation of GlcNAc from sugar chain (HS)	#N/A
THBS2			27.53		Col23a1	collagen, type XXIII, alpha 1	#N/A		Ecm2	extracellular matrix protein 2, female organ and adipocyte specific	3.41		Fmod	fibromodulin	#N/A		Sftpd	surfactant associated protein D	3.87		Mst1	macrophage stimulating 1 (hepatocyte growth factor-like)	#N/A		Mmp14	matrix metallopeptidase 14 (membrane-inserted)	4.4											Hs3st3a1	Sulfation at the 3‐O position of GlcNAc and GlcNS units sulfated at the 6‐O position (HS)	#N/A		Sgsh	Desulfation of GlcNS units (HS)	#N/A
DACT1			26.81		Col10a1	collagen, type X, alpha 1	#N/A		Igfbp5	insulin-like growth factor binding protein 5	3.52		Hapln1	hyaluronan and proteoglycan link protein 1	#N/A		Sema6a	sema domain, transmembrane domain (TM), and cytoplasmic domain, (semaphorin) 6A	5.51		Ebi3	Epstein-Barr virus induced gene 3	#N/A		F13a1	coagulation factor XIII, A1 subunit	4.66											Hs3st3b1	Sulfation at the 3‐O position of GlcNAc and GlcNS units sulfated at the 6‐O position (HS)	#N/A
FILIP1L			25.45		Col11a2	collagen, type XI, alpha 2	#N/A		Slit2	slit homolog 2 (Drosophila)	3.53		Hapln2	hyaluronan and proteoglycan link protein 2	#N/A		Sdc2	syndecan 2	6.44		Megf6	multiple EGF-like-domains 6	#N/A		Lepre1	leprecan 1	5.04											Hs3st6	Sulfation at the 3‐O position of GlcNAc and GlcNS units sulfated at the 6‐O position (HS)	#N/A
			24.92		Col13a1	collagen, type XIII, alpha 1	#N/A		Srpx	sushi-repeat-containing protein	4.22		Hapln4	hyaluronan and proteoglycan link protein 4	#N/A		Lgals9	lectin, galactose binding, soluble 9	7.37		Tgfb2	transforming growth factor, beta 2	#N/A		Plod2	procollagen lysine, 2-oxoglutarate 5-dioxygenase 2	5.75											Hs6st1	Sulfation at the 6‐O position of GlcNAc and N‐sulfated‐glucuronic acid units (GlcNS) (HS)	#N/A
TAGLN			22.88		Col14a1	collagen, type XIV, alpha 1	#N/A		Ctgf	connective tissue growth factor	4.55		Impg1	interphotoreceptor matrix proteoglycan 1	#N/A		C1qtnf1	C1q and tumor necrosis factor related protein 1	9.01		Cxcl10	chemokine (C-X-C motif) ligand 10	#N/A		Ctsk	cathepsin K	6.07											Hs6st2	Sulfation at the 6‐O position of GlcNAc and GlcNS units (HS)	#N/A
			21.31		Col15a1	collagen, type XV, alpha 1	#N/A		Sparc	secreted acidic cysteine rich glycoprotein	4.89		Impg2	interphotoreceptor matrix proteoglycan 2	#N/A		Anxa6	annexin A6	#N/A		Egfl6	EGF-like-domain, multiple 6	#N/A		Mmp2	matrix metallopeptidase 2	6.54											Hs6st3	Sulfation at the 6‐O position of GlcNAc and GlcNS units (HS)	#N/A
LAMA1			21.21		Col16a1	collagen, type XVI, alpha 1	#N/A		Postn	periostin, osteoblast specific factor	5.1		Ncan	neurocan	#N/A		Clec11a	C-type lectin domain family 11, member a	#N/A		Mdk	midkine	#N/A		Pcsk5	proprotein convertase subtilisin/kexin type 5	7.24											Ndst1	N‐de‐acetylation and N‐sulfation of GlcNAc unit (HS)	#N/A
			20.76		Col18a1	collagen, type XVIII, alpha 1	#N/A		Ltbp1	latent transforming growth factor beta binding protein 1	5.13		Nepn	nephrocan	#N/A		Anxa7	annexin A7	#N/A		Crlf1	cytokine receptor-like factor 1	#N/A		Htra1	HtrA serine peptidase 1	9.44											Ndst2	N‐de‐acetylation and N‐sulfation of GlcNAc unit (HS)	#N/A
FILIP1L			19.47		Col19a1	collagen, type XIX, alpha 1	#N/A		Fbn2	fibrillin 2	5.27		Nyx	nyctalopin	#N/A		Itln1	intelectin 1 (galactofuranose binding)	#N/A		Il12b	interleukin 12b	#N/A		Mmp13	matrix metallopeptidase 13	9.55											Ndst3	N‐de‐acetylation and N‐sulfation of GlcNAc unit (HS)	#N/A
MMP1			19.11		Col20a1	collagen, type XX, alpha 1	#N/A		Mfap2	microfibrillar-associated protein 2	5.46		Omd	osteomodulin	#N/A		Sftpb	surfactant associated protein B	#N/A		Cbln4	cerebellin 4 precursor protein	#N/A		Itih5	inter-alpha (globulin) inhibitor H5	13.29											Ndst4	N‐de‐acetylation and N‐sulfation of GlcNAc unit (HS)	#N/A
TMEM132A			19.09		Col22a1	collagen, type XXII, alpha 1	#N/A		Lamb1	laminin B1 subunit 1	5.66		Optc	opticin	#N/A		Sema3d	sema domain, immunoglobulin domain (Ig), short basic domain, secreted, (semaphorin) 3D	#N/A		Megf11	multiple EGF-like-domains 11	#N/A		Mmp3	matrix metallopeptidase 3	13.34											Sulf2	Desulfation of the 6‐O positon of 6‐O sulfated GlcNAc and GlcNS units (HS)	#N/A
FILIP1L			19.08		Col25a1	collagen, type XXV, alpha 1	#N/A		Thbs3	thrombospondin 3	5.94		Podn	podocan	#N/A		Muc5b	mucin 5, subtype B, tracheobronchial	#N/A		S100a13	S100 calcium binding protein A13	#N/A		Sulf1	sulfatase 1	15.21											Sumf1	Cofactor for Sulf1 and Sulf 2 (HS)	#N/A
			18.21		Col27a1	collagen, type XXVII, alpha 1	#N/A		Vwde	von Willebrand factor D and EGF domains	6.07		Podnl1	podocan-like 1	#N/A		Lgals12	lectin, galactose binding, soluble 12	#N/A		Crlf3	cytokine receptor-like factor 3	#N/A		Loxl2	lysyl oxidase-like 2	15.77											Sumf2	Cofactor for Sulf1 and Sulf 2 (HS)	#N/A
CHST2			17.97		Col2a1	collagen, type II, alpha 1	#N/A		Tgfbi	transforming growth factor, beta induced	6.33		Prelp	proline arginine-rich end leucine-rich repeat	#N/A		Colec12	collectin sub-family member 12	#N/A		Hbegf	heparin-binding EGF-like growth factor	#N/A		F13b	coagulation factor XIII, beta subunit	45.86											Ust	Sulfation at the 2‐O position of GlcA and IdoA units (CS)	#N/A
THBS1			15.78		Col4a3	collagen, type IV, alpha 3	#N/A		Igfbp2	insulin-like growth factor binding protein 2	7.25		Spock1	sparc/osteonectin, cwcv and kazal-like domains proteoglycan 1	#N/A		C1ql2	complement component 1, q subcomponent-like 2	#N/A		Inhbb	inhibin beta-B	#N/A		Pamr1	peptidase domain containing associated with muscle regeneration 1	67.96
LOXL2			15.77		Col4a4	collagen, type IV, alpha 4	#N/A		Ecm1	extracellular matrix protein 1	7.54		Spock2	sparc/osteonectin, cwcv and kazal-like domains proteoglycan 2	#N/A		Parm1	prostate androgen-regulated mucin-like protein 1	#N/A		Tgfb1	transforming growth factor, beta 1	#N/A		Kazald1	Kazal-type serine peptidase inhibitor domain 1	241.9
			15.61		Col5a3	collagen, type V, alpha 3	#N/A		Ltbp3	latent transforming growth factor beta binding protein 3	7.71		Spock3	sparc/osteonectin, cwcv and kazal-like domains proteoglycan 3	#N/A		Lman1	lectin, mannose-binding, 1	#N/A		Lep	leptin	#N/A		Ctso	cathepsin O	#N/A
			15.44		Col6a4	collagen, type VI, alpha 4	#N/A		Cthrc1	collagen triple helix repeat containing 1	8.15		Vcan	versican	#N/A		Anxa5	annexin A5	#N/A		Bdnf	brain derived neurotrophic factor	#N/A		Adamts13	a disintegrin-like and metallopeptidase (reprolysin type) with thrombospondin type 1 motif, 13	#N/A
VIT			15.32		Col6a5	predicted gene 7455	#N/A		Pxdn	peroxidasin homolog (Drosophila)	8.67						Clec2l	C-type lectin domain family, member L	#N/A		Vegfc	vascular endothelial growth factor C	#N/A		Cst3	cystatin C	#N/A
SULF1			15.21		Col6a6	collagen, type VI, alpha 6	#N/A		Efemp1	epidermal growth factor-containing fibulin-like extracellular matrix protein 1	14.1						Frem1	Fras1 related extracellular matrix protein 1	#N/A		Ereg	epiregulin	#N/A		Cst6	cystatin E/M	#N/A
			15.18		Col8a1	collagen, type VIII, alpha 1	#N/A		Vit	vitrin	15.32						Gpc1	glypican 1	#N/A		Bmp2	bone morphogenetic protein 2	#N/A		Ogfod2	2-oxoglutarate and iron-dependent oxygenase domain containing 2	#N/A
			15.04		Col8a2	collagen, type VIII, alpha 2	#N/A		Thbs1	thrombospondin 1	15.78						Frem2	Fras1 related extracellular matrix protein 2	#N/A		Areg	amphiregulin	#N/A		Ctsh	cathepsin H	#N/A
MXRA5			14.76		Col9a1	collagen, type IX, alpha 1	#N/A		Lama1	laminin, alpha 1	21.21						Muc16	mucin 16	#N/A		Cxcl14	chemokine (C-X-C motif) ligand 14	#N/A		Adamts2	a disintegrin-like and metallopeptidase (reprolysin type) with thrombospondin type 1 motif, 2	#N/A
			14.71		Col9a2	collagen, type IX, alpha 2	#N/A		Thbs2	thrombospondin 2	27.53						Sema6d	sema domain, transmembrane domain (TM), and cytoplasmic domain, (semaphorin) 6D	#N/A		Fgfbp1	fibroblast growth factor binding protein 1	#N/A		Ctsd	cathepsin D	#N/A
PALLD			14.5		Col9a3	collagen, type IX, alpha 3	#N/A		Fn1	fibronectin 1	39.7						Sema3e	sema domain, immunoglobulin domain (Ig), short basic domain, secreted, (semaphorin) 3E	#N/A		S100z	S100 calcium binding protein, zeta	#N/A		Mmp16	matrix metallopeptidase 16	#N/A
EFEMP1			14.1						Tnc	tenascin C	58.6						Sema5a	sema domain, seven thrombospondin repeats (type 1 and type 1-like), transmembrane domain (TM) and short cytoplasmic domain, (semaphorin) 5A	#N/A		Amh	anti-Mullerian hormone	#N/A		Ctsa	cathepsin A	#N/A
PLEK2			13.73						Mgp	matrix Gla protein	#N/A						C1qtnf3	C1q and tumor necrosis factor related protein 3	#N/A		Angpt1	angiopoietin 1	#N/A		P4ha1	procollagen-proline, 2-oxoglutarate 4-dioxygenase (proline 4-hydroxylase), alpha 1 polypeptide	#N/A
COL7A1			13.46						Dpt	dermatopontin	#N/A						Sema4d	sema domain, immunoglobulin domain (Ig), transmembrane domain (TM) and short cytoplasmic domain, (semaphorin) 4D	#N/A		Angpt2	angiopoietin 2	#N/A		Fam20c	family with sequence similarity 20, member c	#N/A
MMP3			13.34						Vwf	Von Willebrand factor homolog	#N/A						Lgals4	lectin, galactose binding, soluble 4	#N/A		Angpt4	angiopoietin 4	#N/A		Ctsc	cathepsin C	#N/A
ITIH5			13.29						Gas6	growth arrest specific 6	#N/A						Muc15	mucin 15	#N/A		Angptl1	angiopoietin-like 1	#N/A		Serpini1	serine (or cysteine) peptidase inhibitor, clade I, member 1	#N/A
			13.14						Lama4	laminin, alpha 4	#N/A						Hpx	hemopexin	#N/A		Angptl3	angiopoietin-like 3	#N/A		Ctsz	cathepsin Z	#N/A
			12.14						Mfap5	microfibrillar associated protein 5	#N/A						Sdc4	syndecan 4	#N/A		Angptl4	angiopoietin-like 4	#N/A		Leprel1	leprecan-like 1	#N/A
ENTPD1			11.96						Lama2	laminin, alpha 2	#N/A						Anxa10	annexin A10	#N/A		Angptl6	angiopoietin-like 6	#N/A		A2m	alpha-2-macroglobulin	#N/A
			11.76						Nid2	nidogen 2	#N/A						Anxa11	annexin A11	#N/A		Angptl7	angiopoietin-like 7	#N/A		Hyal1	hyaluronoglucosaminidase 1	#N/A
CHGA			11.47						Creld1	cysteine-rich with EGF-like domains 1	#N/A						Anxa13	annexin A13	#N/A		Artn	artemin	#N/A		Fam20b	family with sequence similarity 20, member b	#N/A
			11.45						Lgi1	leucine-rich repeat LGI family, member 1	#N/A						Anxa3	annexin A3	#N/A		Bmp10	bone morphogenetic protein 10	#N/A		Tgm6	transglutaminase 6	#N/A
FABP3			11.42						Crispld1	cysteine-rich secretory protein LCCL domain containing 1	#N/A						Anxa4	annexin A4	#N/A		Bmp15	bone morphogenetic protein 15	#N/A		St14	suppression of tumorigenicity 14 (colon carcinoma)	#N/A
			11.36						Lamb2	laminin, beta 2	#N/A						Anxa8	annexin A8	#N/A		Bmp3	bone morphogenetic protein 3	#N/A		Serpinf2	serine (or cysteine) peptidase inhibitor, clade F, member 2	#N/A
SPATS2L			11.31						Fbln5	fibulin 5	#N/A						Anxa9	annexin A9	#N/A		Bmp4	bone morphogenetic protein 4	#N/A		Adam9	a disintegrin and metallopeptidase domain 9 (meltrin gamma)	#N/A
HMOX1			11.3						Fbln1	fibulin 1	#N/A						C1qa	complement component 1, q subcomponent, alpha polypeptide	#N/A		Bmp5	bone morphogenetic protein 5	#N/A		Ngly1	N-glycanase 1	#N/A
C6orf27			11.25						Tnfaip6	tumor necrosis factor alpha induced protein 6	#N/A						C1ql1	complement component 1, q subcomponent-like 1	#N/A		Bmp6	bone morphogenetic protein 6	#N/A		Serpinb5	serine (or cysteine) peptidase inhibitor, clade B, member 5	#N/A
MAMDC2			10.79						Cyr61	cysteine rich protein 61	#N/A						C1ql3	C1q-like 3	#N/A		Bmp7	bone morphogenetic protein 7	#N/A		Hyal2	hyaluronoglucosaminidase 2	#N/A
RAB34			10.5						Lamc1	laminin, gamma 1	#N/A						C1ql4	complement component 1, q subcomponent-like 4	#N/A		Bmp8a	bone morphogenetic protein 8a	#N/A		Tgm2	transglutaminase 2, C polypeptide	#N/A
PMEPA1			10.5						Vwa5a	von Willebrand factor A domain containing 5A	#N/A						C1qtnf4	C1q and tumor necrosis factor related protein 4	#N/A		Bmp8b	bone morphogenetic protein 8b	#N/A		Tgm3	transglutaminase 3, E polypeptide	#N/A
VIM			10.43						Gldn	gliomedin	#N/A						C1qtnf6	C1q and tumor necrosis factor related protein 6	#N/A		Brinp2	family with sequence similarity 5, member B	#N/A		Adam28	a disintegrin and metallopeptidase domain 28	#N/A
PTHLH			10.24						Crispld2	cysteine-rich secretory protein LCCL domain containing 2	#N/A						C1qtnf7	C1q and tumor necrosis factor related protein 7	#N/A		Brinp3	family with sequence similarity 5, member C	#N/A		Tgm5	transglutaminase 5	#N/A
KRTAP9-2			10						Edil3	EGF-like repeats and discoidin I-like domains 3	#N/A						C1qtnf9	C1q and tumor necrosis factor related protein 9	#N/A		Cbln1	cerebellin 1 precursor protein	#N/A		Masp2	mannan-binding lectin serine peptidase 2	#N/A
SIGLEC1			9.97						Igfbp6	insulin-like growth factor binding protein 6	#N/A						Cd209a	CD209a antigen	#N/A		Cbln2	cerebellin 2 precursor protein	#N/A		Mmp19	matrix metallopeptidase 19	#N/A
CUBN			9.93						Lamb3	laminin, beta 3	#N/A						Cd209b	CD209b antigen	#N/A		Cbln3	cerebellin 3 precursor protein	#N/A		Loxl1	lysyl oxidase-like 1	#N/A
			9.81						Spon1	spondin 1, (f-spondin) extracellular matrix protein	#N/A						Cd209d	CD209d antigen	#N/A		Ccbe1	collagen and calcium binding EGF domains 1	#N/A		Mmp10	matrix metallopeptidase 10	#N/A
CRABP2			9.65						Igfbp7	insulin-like growth factor binding protein 7	#N/A						Clc	Charcot-Leyden crystal protein	#N/A		Ccl1	chemokine (C-C motif) ligand 1	#N/A		Tgm1	transglutaminase 1, K polypeptide	#N/A
FABP2			9.58						Creld2	cysteine-rich with EGF-like domains 2	#N/A						Clec10a	C-type lectin domain family 10, member A	#N/A		Ccl11	chemokine (C-C motif) ligand 11	#N/A		Mmp8	matrix metallopeptidase 8	#N/A
MMP13			9.55						Igfbp3	insulin-like growth factor binding protein 3	#N/A						Clec12a	C-type lectin domain family 12, member a	#N/A		Ccl12	chemokine (C-C motif) ligand 12	#N/A		1810010H24Rik	RIKEN cDNA 1810010H24 gene	#N/A
			9.51						Fgl2	fibrinogen-like protein 2	#N/A						Clec12b	C-type lectin domain family 12, member B	#N/A		Ccl17	chemokine (C-C motif) ligand 17	#N/A		2010005H15Rik	RIKEN cDNA 2010005H15 gene	#N/A
			9.47						5430419D17Rik	RIKEN cDNA 5430419D17 gene	#N/A						Clec14a	C-type lectin domain family 14, member a	#N/A		Ccl19	chemokine (C-C motif) ligand 19	#N/A		8030411F24Rik	RIKEN cDNA 8030411F24 gene	#N/A
HTRA1			9.44						Aebp1	AE binding protein 1	#N/A						Clec18a	C-type lectin domain family 18, member A	#N/A		Ccl2	chemokine (C-C motif) ligand 2	#N/A		9230104L09Rik	RIKEN cDNA 9230104L09 gene	#N/A
ADH1B			9.36						Agrn	agrin	#N/A						Clec1a	C-type lectin domain family 1, member a	#N/A		Ccl20	chemokine (C-C motif) ligand 20	#N/A		Adam10	a disintegrin and metallopeptidase domain 10	#N/A
			9.35						Ambn	ameloblastin	#N/A						Clec1b	C-type lectin domain family 1, member b	#N/A		Ccl21a	chemokine (C-C motif) ligand 21A	#N/A		Adam11	a disintegrin and metallopeptidase domain 11	#N/A
SFRP4			9.19						Amelx	amelogenin X chromosome	#N/A						Clec2d	C-type lectin domain family 2, member d	#N/A		Ccl21b	chemokine (C-C motif) ligand 21B	#N/A		Adam12	a disintegrin and metallopeptidase domain 12 (meltrin alpha)	#N/A
PRICKLE2			9.11						AW551984	expressed sequence AW551984	#N/A						Clec2e	C-type lectin domain family 2, member e	#N/A		Ccl21c	chemokine (C-C motif) ligand 21C (leucine)	#N/A		Adam15	a disintegrin and metallopeptidase domain 15 (metargidin)	#N/A
C1QTNF1			9.01						Bglap2	bone gamma-carboxyglutamate protein 2	#N/A						Clec2g	C-type lectin domain family 2, member g	#N/A		Ccl22	chemokine (C-C motif) ligand 22	#N/A		Adam17	a disintegrin and metallopeptidase domain 17	#N/A
			8.98						Bglap3	bone gamma-carboxyglutamate protein, related sequence 1	#N/A						Clec2h	C-type lectin domain family 2, member h	#N/A		Ccl24	chemokine (C-C motif) ligand 24	#N/A		Adam18	a disintegrin and metallopeptidase domain 18	#N/A
			8.9						Bmper	BMP-binding endothelial regulator	#N/A						Clec2i	C-type lectin domain family 2, member i	#N/A		Ccl25	chemokine (C-C motif) ligand 25	#N/A		Adam19	a disintegrin and metallopeptidase domain 19 (meltrin beta)	#N/A
C2orf40			8.69						Bsph1	binder of sperm protein homolog 1	#N/A						Clec2j	C-type lectin domain family 2, member J	#N/A		Ccl26	chemokine (C-C motif) ligand 26	#N/A		Adam1a	a disintegrin and metallopeptidase domain 1a	#N/A
COL4A5			8.68						Bsph2	RIKEN cDNA 9230107M04 gene	#N/A						Clec3a	C-type lectin domain family 3, member a	#N/A		Ccl27a	chemokine (C-C motif) ligand 27A	#N/A		Adam1b	a disintegrin and metallopeptidase domain 1b	#N/A
PXDN			8.67						Cdcp2	CUB domain containing protein 2	#N/A						Clec4a1	C-type lectin domain family 4, member a1	#N/A		Ccl28	chemokine (C-C motif) ligand 28	#N/A		Adam2	a disintegrin and metallopeptidase domain 2	#N/A
			8.51						Cilp	cartilage intermediate layer protein, nucleotide pyrophosphohydrolase	#N/A						Clec4a2	C-type lectin domain family 4, member a2	#N/A		Ccl3	chemokine (C-C motif) ligand 3	#N/A		Adam20	RIKEN cDNA 4930529F22 gene	#N/A
CRY1			8.41						Cilp2	cartilage intermediate layer protein 2	#N/A						Clec4a3	C-type lectin domain family 4, member a3	#N/A		Ccl4	chemokine (C-C motif) ligand 4	#N/A		Adam21	a disintegrin and metallopeptidase domain 21	#N/A
PRSS23			8.29						Coch	coagulation factor C homolog (Limulus polyphemus)	#N/A						Clec4a4	C-type lectin domain family 4, member a4	#N/A		Ccl5	chemokine (C-C motif) ligand 5	#N/A		Adam22	a disintegrin and metallopeptidase domain 22	#N/A
			8.26						Col26a1	EMI domain containing 2	#N/A						Clec4b1	C-type lectin domain family 4, member b1	#N/A		Ccl6	chemokine (C-C motif) ligand 6	#N/A		Adam23	a disintegrin and metallopeptidase domain 23	#N/A
CDH15			8.18						Colq	collagen-like tail subunit (single strand of homotrimer) of asymmetric acetylcholinesterase	#N/A						Clec4b2	C-type lectin domain family 4, member b2	#N/A		Ccl7	chemokine (C-C motif) ligand 7	#N/A		Adam24	a disintegrin and metallopeptidase domain 24 (testase 1)	#N/A
CTHRC1			8.15						Comp	cartilage oligomeric matrix protein	#N/A						Clec4d	C-type lectin domain family 4, member d	#N/A		Ccl8	chemokine (C-C motif) ligand 8	#N/A		Adam25	a disintegrin and metallopeptidase domain 25 (testase 2)	#N/A
			8.15						Crim1	cysteine rich transmembrane BMP regulator 1 (chordin like)	#N/A						Clec4e	C-type lectin domain family 4, member e	#N/A		Ccl9	chemokine (C-C motif) ligand 9	#N/A		Adam26a	a disintegrin and metallopeptidase domain 26A (testase 3)	#N/A
MMP3			8.02						Ddx26b	DEAD/H (Asp-Glu-Ala-Asp/His) box polypeptide 26B	#N/A						Clec4f	C-type lectin domain family 4, member f	#N/A		Cfc1	cripto, FRL-1, cryptic family 1	#N/A		Adam26b	a disintegrin and metallopeptidase domain 26B	#N/A
			7.96						Dmp1	dentin matrix protein 1	#N/A						Clec4g	C-type lectin domain family 4, member g	#N/A		Chrd	chordin	#N/A		Adam29	a disintegrin and metallopeptidase domain 29	#N/A
			7.92						Dspp	dentin sialophosphoprotein	#N/A						Clec4n	C-type lectin domain family 4, member n	#N/A		Chrdl2	chordin-like 2	#N/A		Adam3	a disintegrin and metallopeptidase domain 3 (cyritestin)	#N/A
ADFP			7.91						Efemp2	epidermal growth factor-containing fibulin-like extracellular matrix protein 2	#N/A						Clec5a	C-type lectin domain family 5, member a	#N/A		Clcf1	cardiotrophin-like cytokine factor 1	#N/A		Adam30	a disintegrin and metallopeptidase domain 30	#N/A
LTBP3			7.71						Egfem1	RIKEN cDNA 6130401L20 gene	#N/A						Clec7a	C-type lectin domain family 7, member a	#N/A		Cntf	ciliary neurotrophic factor	#N/A		Adam32	a disintegrin and metallopeptidase domain 32	#N/A
ECM1			7.54						Egflam	EGF-like, fibronectin type III and laminin G domains	#N/A						Clec9a	C-type lectin domain family 9, member a	#N/A		Crhbp	corticotropin releasing hormone binding protein	#N/A		Adam33	a disintegrin and metallopeptidase domain 33	#N/A
LGALS9			7.37						Eln	elastin	#N/A						Colec10	collectin sub-family member 10	#N/A		Crnn	cornulin	#N/A		Adam34	a disintegrin and metallopeptidase domain 34	#N/A
			7.31						Emid1	EMI domain containing 1	#N/A						Colec11	collectin sub-family member 11	#N/A		Csf1	colony stimulating factor 1 (macrophage)	#N/A		Adam39	a disintegrin and metallopeptidase domain 39	#N/A
BCMO1			7.29						Emilin1	elastin microfibril interfacer 1	#N/A						Cspg4	chondroitin sulfate proteoglycan 4	#N/A		Csf2	colony stimulating factor 2 (granulocyte-macrophage)	#N/A		Adam4	a disintegrin and metallopeptidase domain 4	#N/A
IGFBP2			7.25						Emilin3	elastin microfibril interfacer 3	#N/A						Elfn2	leucine rich repeat and fibronectin type III, extracellular 2	#N/A		Csf3	colony stimulating factor 3 (granulocyte)	#N/A		Adam5	a disintegrin and metallopeptidase domain 5	#N/A
PCSK5			7.24						Fbln2	fibulin 2	#N/A						Emcn	endomucin	#N/A		Ctf1	cardiotrophin 1	#N/A		Adam6a	a disintegrin and metallopeptidase domain 6A	#N/A
EFNA1			7.22						Fbln7	fibulin 7	#N/A						Fcna	ficolin A	#N/A		Ctf2	cardiotrophin 2	#N/A		Adam6b	a disintegrin and metallopeptidase domain 6B	#N/A
			7.08						Fga	fibrinogen alpha chain	#N/A						Fcnb	ficolin B	#N/A		Cx3cl1	chemokine (C-X3-C motif) ligand 1	#N/A		Adam7	a disintegrin and metallopeptidase domain 7	#N/A
			7.02						Fgb	fibrinogen beta chain	#N/A						Frem3	Fras1 related extracellular matrix protein 3	#N/A		Cxcl1	chemokine (C-X-C motif) ligand 1	#N/A		Adam8	a disintegrin and metallopeptidase domain 8	#N/A
ANTXR2			6.89						Fgg	fibrinogen gamma chain	#N/A						Gm7534	predicted gene 7534	#N/A		Cxcl11	chemokine (C-X-C motif) ligand 11	#N/A		Adamdec1	ADAM-like, decysin 1	#N/A
MMP2			6.54						Fgl1	fibrinogen-like protein 1	#N/A						Gm9573	predicted gene 9573	#N/A		Cxcl12	chemokine (C-X-C motif) ligand 12	#N/A		Adamts1	a disintegrin-like and metallopeptidase (reprolysin type) with thrombospondin type 1 motif, 1	#N/A
FIGF			6.52						Fndc1	fibronectin type III domain containing 1	#N/A						Gpc2	glypican 2 (cerebroglycan)	#N/A		Cxcl13	chemokine (C-X-C motif) ligand 13	#N/A		Adamts10	a disintegrin-like and metallopeptidase (reprolysin type) with thrombospondin type 1 motif, 10	#N/A
SDC2			6.44						Fndc7	fibronectin type III domain containing 7	#N/A						Gpc3	glypican 3	#N/A		Cxcl15	chemokine (C-X-C motif) ligand 15	#N/A		Adamts14	a disintegrin-like and metallopeptidase (reprolysin type) with thrombospondin type 1 motif, 14	#N/A
TGFBI			6.33						Fndc8	fibronectin type III domain containing 8	#N/A						Gpc5	glypican 5	#N/A		Cxcl2	chemokine (C-X-C motif) ligand 2	#N/A		Adamts15	a disintegrin-like and metallopeptidase (reprolysin type) with thrombospondin type 1 motif, 15	#N/A
			6.29						Fras1	Fraser syndrome 1 homolog (human)	#N/A						Gpc6	glypican 6	#N/A		Cxcl3	chemokine (C-X-C motif) ligand 3	#N/A		Adamts16	a disintegrin-like and metallopeptidase (reprolysin type) with thrombospondin type 1 motif, 16	#N/A
TMEM86A			6.26						Hmcn1	hemicentin 1	#N/A						Grem1	gremlin 1	#N/A		Cxcl5	chemokine (C-X-C motif) ligand 5	#N/A		Adamts17	a disintegrin-like and metallopeptidase (reprolysin type) with thrombospondin type 1 motif, 17	#N/A
			6.25						Hmcn2	hemicentin 2	#N/A						Grifin	galectin-related inter-fiber protein	#N/A		Cxcl9	chemokine (C-X-C motif) ligand 9	#N/A		Adamts18	a disintegrin-like and metallopeptidase (reprolysin type) with thrombospondin type 1 motif, 18	#N/A
			6.25						Ibsp	integrin binding sialoprotein	#N/A						Itlnb	intelectin b	#N/A		Dhh	desert hedgehog	#N/A		Adamts19	a disintegrin-like and metallopeptidase (reprolysin type) with thrombospondin type 1 motif, 19	#N/A
KRT15			6.2						Igfbp1	insulin-like growth factor binding protein 1	#N/A						Lgals2	lectin, galactose-binding, soluble 2	#N/A		Eda	ectodysplasin-A	#N/A		Adamts20	a disintegrin-like and metallopeptidase (reprolysin type) with thrombospondin type 1 motif, 20	#N/A
BCAR3			6.16						Igfbp4	insulin-like growth factor binding protein 4	#N/A						Lgals6	lectin, galactose binding, soluble 6	#N/A		Egf	epidermal growth factor	#N/A		Adamts3	a disintegrin-like and metallopeptidase (reprolysin type) with thrombospondin type 1 motif, 3	#N/A
PRICKLE1			6.09						Igfbpl1	insulin-like growth factor binding protein-like 1	#N/A						Lgals7	lectin, galactose binding, soluble 7	#N/A		Egfl8	EGF-like domain 8	#N/A		Adamts4	a disintegrin-like and metallopeptidase (reprolysin type) with thrombospondin type 1 motif, 4	#N/A
CTSK			6.07						Igsf10	immunoglobulin superfamily, member 10	#N/A						Lgalsl	RIKEN cDNA 1110067D22 gene	#N/A		Epgn	epithelial mitogen	#N/A		Adamts5	a disintegrin-like and metallopeptidase (reprolysin type) with thrombospondin type 1 motif, 5 (aggrecanase-2)	#N/A
VWDE			6.07						Kcp	kielin/chordin-like protein	#N/A						Lman1l	lectin, mannose-binding 1 like	#N/A		Epo	erythropoietin	#N/A		Adamts6	a disintegrin-like and metallopeptidase (reprolysin type) with thrombospondin type 1 motif, 6	#N/A
			6.06						Lama3	laminin, alpha 3	#N/A						Mbl1	mannose-binding lectin (protein A) 1	#N/A		Fam132a	family with sequence similarity 132, member A	#N/A		Adamts7	a disintegrin-like and metallopeptidase (reprolysin type) with thrombospondin type 1 motif, 7	#N/A
TUBA1A			6.02						Lama5	laminin, alpha 5	#N/A						Mbl2	mannose-binding lectin (protein C) 2	#N/A		Fam132b	family with sequence similarity 132, member B	#N/A		Adamts8	a disintegrin-like and metallopeptidase (reprolysin type) with thrombospondin type 1 motif, 8	#N/A
			5.97						Lamc2	laminin, gamma 2	#N/A						Muc1	mucin 1, transmembrane	#N/A		Fasl	Fas ligand (TNF superfamily, member 6)	#N/A		Adamts9	a disintegrin-like and metallopeptidase (reprolysin type) with thrombospondin type 1 motif, 9	#N/A
THBS3			5.94						Lamc3	laminin gamma 3	#N/A						Muc13	mucin 13, epithelial transmembrane	#N/A		Fgf1	fibroblast growth factor 1	#N/A		Adamtsl1	ADAMTS-like 1	#N/A
CALD1			5.93						Lgi2	leucine-rich repeat LGI family, member 2	#N/A						Muc19	mucin 19	#N/A		Fgf10	fibroblast growth factor 10	#N/A		Adamtsl2	ADAMTS-like 2	#N/A
EDNRA			5.92						Lgi3	leucine-rich repeat LGI family, member 3	#N/A						Muc20	mucin 20	#N/A		Fgf11	fibroblast growth factor 11	#N/A		Adamtsl3	ADAMTS-like 3	#N/A
			5.91						Lgi4	leucine-rich repeat LGI family, member 4	#N/A						Muc3	mucin 3, intestinal	#N/A		Fgf13	fibroblast growth factor 13	#N/A		Adamtsl4	ADAMTS-like 4	#N/A
COL12A1			5.84						Lrg1	leucine-rich alpha-2-glycoprotein 1	#N/A						Muc5ac	mucin 5, subtypes A and C, tracheobronchial/gastric	#N/A		Fgf14	fibroblast growth factor 14	#N/A		Adamtsl5	ADAMTS-like 5	#N/A
			5.84						Ltbp2	latent transforming growth factor beta binding protein 2	#N/A						Muc6	mucin 6, gastric	#N/A		Fgf15	fibroblast growth factor 15	#N/A		Agt	angiotensinogen (serpin peptidase inhibitor, clade A, member 8)	#N/A
TMEFF1			5.81						Ltbp4	latent transforming growth factor beta binding protein 4	#N/A						Mucl1	mucin-like 1	#N/A		Fgf16	fibroblast growth factor 16	#N/A		AI182371	expressed sequence AI182371	#N/A
ITGA6			5.77						Matn1	matrilin 1, cartilage matrix protein	#N/A						Ovgp1	oviductal glycoprotein 1	#N/A		Fgf17	fibroblast growth factor 17	#N/A		Ambp	alpha 1 microglobulin/bikunin	#N/A
PLOD2			5.75						Matn3	matrilin 3	#N/A						Plxdc1	plexin domain containing 1	#N/A		Fgf18	fibroblast growth factor 18	#N/A		BC048546	cDNA sequence BC048546	#N/A
CD68			5.68						Matn4	matrilin 4	#N/A						Plxdc2	plexin domain containing 2	#N/A		Fgf2	fibroblast growth factor 2	#N/A		BC051665	cDNA sequence BC051665	#N/A
LAMB1			5.66						Mepe	matrix extracellular phosphoglycoprotein with ASARM motif (bone)	#N/A						Plxna1	plexin A1	#N/A		Fgf20	fibroblast growth factor 20	#N/A		BC100530	cDNA sequence BC100530	#N/A
			5.56						Mfap1a	microfibrillar-associated protein 1A	#N/A						Plxna2	plexin A2	#N/A		Fgf21	fibroblast growth factor 21	#N/A		BC117090	cDNA sequence BC1179090	#N/A
PAG1			5.53						Mfap1b	microfibrillar-associated protein 1B	#N/A						Plxna3	plexin A3	#N/A		Fgf22	fibroblast growth factor 22	#N/A		Cela1	chymotrypsin-like elastase family, member 1	#N/A
SEMA6A			5.51						Mfap3	microfibrillar-associated protein 3	#N/A						Plxna4	plexin A4	#N/A		Fgf23	fibroblast growth factor 23	#N/A		Cela2a	chymotrypsin-like elastase family, member 2A	#N/A
			5.51						Mfap4	microfibrillar-associated protein 4	#N/A						Plxnb1	plexin B1	#N/A		Fgf3	fibroblast growth factor 3	#N/A		Cela3b	chymotrypsin-like elastase family, member 3B	#N/A
			5.49						Mfge8	milk fat globule-EGF factor 8 protein	#N/A						Plxnb3	plexin B3	#N/A		Fgf4	fibroblast growth factor 4	#N/A		Cpn2	carboxypeptidase N, polypeptide 2	#N/A
ITGAD			5.47						Mmrn2	multimerin 2	#N/A						Plxnc1	plexin C1	#N/A		Fgf5	fibroblast growth factor 5	#N/A		Cst10	cystatin 10 (chondrocytes)	#N/A
MFAP2			5.46						Ndnf	RIKEN cDNA A930038C07 gene	#N/A						Prol1	proline rich, lacrimal 1	#N/A		Fgf6	fibroblast growth factor 6	#N/A		Cst11	cystatin 11	#N/A
ANGPTL2			5.43						Nell1	NEL-like 1 (chicken)	#N/A						Reg1	regenerating islet-derived 1	#N/A		Fgf7	fibroblast growth factor 7	#N/A		Cst12	cystatin 12	#N/A
MARCO			5.39						Nell2	NEL-like 2 (chicken)	#N/A						Reg2	regenerating islet-derived 2	#N/A		Fgf8	fibroblast growth factor 8	#N/A		Cst13	cystatin 13	#N/A
SFRP2			5.39						Nid1	nidogen 1	#N/A						Reg3a	regenerating islet-derived 3 alpha	#N/A		Fgf9	fibroblast growth factor 9	#N/A		Cst7	cystatin F (leukocystatin)	#N/A
TLN1			5.38						Nov	nephroblastoma overexpressed gene	#N/A						Reg3b	regenerating islet-derived 3 beta	#N/A		Fgfbp3	fibroblast growth factor binding protein 3	#N/A		Cst8	cystatin 8 (cystatin-related epididymal spermatogenic)	#N/A
PPP2R2B			5.38						Npnt	nephronectin	#N/A						Reg3d	regenerating islet-derived 3 delta	#N/A		Flg	filaggrin	#N/A		Cst9	cystatin 9	#N/A
DENND5A			5.32						Ntn1	netrin 1	#N/A						Reg3g	regenerating islet-derived 3 gamma	#N/A		Flg2	filaggrin family member 2	#N/A		Csta1	cystatin A	#N/A
TFF3			5.3						Ntn3	netrin 3	#N/A						Reg4	regenerating islet-derived family, member 4	#N/A		Flt3l	FMS-like tyrosine kinase 3 ligand	#N/A		Cstl1	cystatin-like 1	#N/A
			5.29						Ntn4	netrin 4	#N/A						Sdc3	syndecan 3	#N/A		Frzb	frizzled-related protein	#N/A		Cts3	cathepsin 3	#N/A
FBN2			5.27						Ntn5	netrin 5	#N/A						Sema3a	sema domain, immunoglobulin domain (Ig), short basic domain, secreted, (semaphorin) 3A	#N/A		Fst	follistatin	#N/A		Cts6	cathepsin 6	#N/A
			5.24						Ntng1	netrin G1	#N/A						Sema3b	sema domain, immunoglobulin domain (Ig), short basic domain, secreted, (semaphorin) 3B	#N/A		Fstl3	follistatin-like 3	#N/A		Cts7	cathepsin 7	#N/A
			5.23						Ntng2	netrin G2	#N/A						Sema3c	sema domain, immunoglobulin domain (Ig), short basic domain, secreted, (semaphorin) 3C	#N/A		Gdf1	growth differentiation factor 1	#N/A		Cts8	cathepsin 8	#N/A
			5.22						Oit3	oncoprotein induced transcript 3	#N/A						Sema3f	sema domain, immunoglobulin domain (Ig), short basic domain, secreted, (semaphorin) 3F	#N/A		Gdf10	growth differentiation factor 10	#N/A		Ctse	cathepsin E	#N/A
			5.2						Otog	otogelin	#N/A						Sema3g	sema domain, immunoglobulin domain (Ig), short basic domain, secreted, (semaphorin) 3G	#N/A		Gdf11	growth differentiation factor 11	#N/A		Ctsf	cathepsin F	#N/A
COL11A1			5.18						Otogl	predicted gene 6924	#N/A						Sema4a	sema domain, immunoglobulin domain (Ig), transmembrane domain (TM) and short cytoplasmic domain, (semaphorin) 4A	#N/A		Gdf15	growth differentiation factor 15	#N/A		Ctsj	cathepsin J	#N/A
ITGB1			5.17						Otol1	predicted gene 414	#N/A						Sema4b	sema domain, immunoglobulin domain (Ig), transmembrane domain (TM) and short cytoplasmic domain, (semaphorin) 4B	#N/A		Gdf2	growth differentiation factor 2	#N/A		Ctsl	cathepsin L	#N/A
			5.14						Papln	papilin, proteoglycan-like sulfated glycoprotein	#N/A						Sema4c	sema domain, immunoglobulin domain (Ig), transmembrane domain (TM) and short cytoplasmic domain, (semaphorin) 4C	#N/A		Gdf3	growth differentiation factor 3	#N/A		Ctsll3	cathepsin L-like 3	#N/A
LTBP1			5.13						Rspo1	R-spondin homolog (Xenopus laevis)	#N/A						Sema4f	sema domain, immunoglobulin domain (Ig), TM domain, and short cytoplasmic domain	#N/A		Gdf5	growth differentiation factor 5	#N/A		Ctsm	cathepsin M	#N/A
			5.12						Rspo2	R-spondin 2 homolog (Xenopus laevis)	#N/A						Sema4g	sema domain, immunoglobulin domain (Ig), transmembrane domain (TM) and short cytoplasmic domain, (semaphorin) 4G	#N/A		Gdf6	growth differentiation factor 6	#N/A		Ctsq	cathepsin Q	#N/A
EPHA7			5.11						Rspo3	R-spondin 3 homolog (Xenopus laevis)	#N/A						Sema5b	sema domain, seven thrombospondin repeats (type 1 and type 1-like), transmembrane domain (TM) and short cytoplasmic domain, (semaphorin) 5B	#N/A		Gdf7	growth differentiation factor 7	#N/A		Ctsr	cathepsin R	#N/A
POSTN			5.1						Rspo4	R-spondin family, member 4	#N/A						Sema6b	sema domain, transmembrane domain (TM), and cytoplasmic domain, (semaphorin) 6B	#N/A		Gdf9	growth differentiation factor 9	#N/A		Ctsw	cathepsin W	#N/A
MRC1			5.07						Sbspon	predicted gene 106	#N/A						Sema6c	sema domain, transmembrane domain (TM), and cytoplasmic domain, (semaphorin) 6C	#N/A		Gdnf	glial cell line derived neurotrophic factor	#N/A		Egln1	EGL nine homolog 1 (C. elegans)	#N/A
KLF11			5.06						Slamf6	SLAM family member 6	#N/A						Sema7a	sema domain, immunoglobulin domain (Ig), and GPI membrane anchor, (semaphorin) 7A	#N/A		Gh	growth hormone	#N/A		Egln2	EGL nine homolog 2 (C. elegans)	#N/A
LEPRE1			5.04						Slit1	slit homolog 1 (Drosophila)	#N/A						Sfta2	surfactant associated 2	#N/A		Gm13271	predicted gene 13271	#N/A		Egln3	EGL nine homolog 3 (C. elegans)	#N/A
TFPI2			4.93						Slit3	slit homolog 3 (Drosophila)	#N/A						Sftpa1	surfactant associated protein A1	#N/A		Gm13272	predicted gene 13272	#N/A		Elane	elastase, neutrophil expressed	#N/A
CYBB			4.92						Smoc1	SPARC related modular calcium binding 1	#N/A						Sftpc	surfactant associated protein C	#N/A		Gm13275	predicted gene 13275	#N/A		F12	coagulation factor XII (Hageman factor)	#N/A
			4.92						Smoc2	SPARC related modular calcium binding 2	#N/A										Gm13276	predicted gene 13276	#N/A		F2	coagulation factor II	#N/A
GPNMB			4.91						Sned1	sushi, nidogen and EGF-like domains 1	#N/A										Gm13277	predicted gene 13277	#N/A		F7	coagulation factor VII	#N/A
SPARC			4.89						Sparcl1	SPARC-like 1	#N/A										Gm13278	predicted gene 13278	#N/A		F9	coagulation factor IX	#N/A
			4.86						Spp1	secreted phosphoprotein 1	#N/A										Gm13279	predicted gene 13279	#N/A		Fam20a	family with sequence similarity 20, member a	#N/A
ESPN			4.85						Sspo	SCO-spondin	#N/A										Gm13283	predicted gene 13283	#N/A		Gm10334	predicted gene 10334	#N/A
KRT12			4.85						Svep1	sushi, von Willebrand factor type A, EGF and pentraxin domain containing 1	#N/A										Gm13285	predicted gene 13285	#N/A		Gm13011	predicted gene 13011	#N/A
COL24A1			4.85						Tectb	tectorin beta	#N/A										Gm13287	predicted gene 13287	#N/A		Gm4758	predicted gene 4758	#N/A
IL10RA			4.84						Thsd4	thrombospondin, type I, domain containing 4	#N/A										Gm13288	predicted gene 13288	#N/A		Gm4787	predicted gene 4787	#N/A
			4.82						Tinag	tubulointerstitial nephritis antigen	#N/A										Gm13289	predicted gene 13289	#N/A		Gm5347	predicted gene 5347	#N/A
TPM2			4.79						Tinagl1	tubulointerstitial nephritis antigen-like 1	#N/A										Gm13290	predicted gene 13290	#N/A		Gm5409	predicted pseudogene 5409	#N/A
FKBP10			4.77						Tnn	tenascin N	#N/A										Gm13306	predicted gene 13306	#N/A		Gm5416	predicted gene 5416	#N/A
COL5A1			4.73						Tnr	tenascin R	#N/A										Gm5849	predicted gene 5849	#N/A		Gm5483	predicted gene 5483	#N/A
RASA4			4.7						Tsku	tsukushin	#N/A										Hcfc1	host cell factor C1	#N/A		Gm5771	predicted gene 5771	#N/A
CREM			4.67						Tspear	RIKEN cDNA C330046G03 gene	#N/A										Hcfc2	host cell factor C2	#N/A		Habp2	hyaluronic acid binding protein 2	#N/A
F13A1			4.66						Vtn	vitronectin	#N/A										Hgf	hepatocyte growth factor	#N/A		Hpse	heparanase	#N/A
CD53			4.62						Vwa1	von Willebrand factor A domain containing 1	#N/A										Hgfac	hepatocyte growth factor activator	#N/A		Hpse2	heparanase 2	#N/A
			4.6						Vwa2	von Willebrand factor A domain containing 2	#N/A										Hhip	Hedgehog-interacting protein	#N/A		Hrg	histidine-rich glycoprotein	#N/A
SC65			4.58						Vwa3a	von Willebrand factor A domain containing 3A	#N/A										Hrnr	hornerin	#N/A		Htra4	HtrA serine peptidase 4	#N/A
CALD1			4.56						Vwa3b	von Willebrand factor A domain containing 3B	#N/A										Ifna1	interferon alpha 1	#N/A		Hyal3	hyaluronoglucosaminidase 3	#N/A
CTGF			4.55						Vwa5b1	von Willebrand factor A domain containing 5B1	#N/A										Ifna11	interferon alpha 11	#N/A		Hyal4	hyaluronoglucosaminidase 4	#N/A
FKBP9			4.54						Vwa5b2	von Willebrand factor A domain containing 5B2	#N/A										Ifna12	interferon alpha 12	#N/A		Hyal5	hyaluronoglucosaminidase 5	#N/A
TFPI			4.53						Vwa7	DNA segment, Chr 17, human D6S56E 3	#N/A										Ifna13	interferon alpha 13	#N/A		Hyal6	hyaluronoglucosaminidase 6	#N/A
AIF1			4.53						Vwa9	RIKEN cDNA 2010321M09 gene	#N/A										Ifna14	interferon, alpha 14	#N/A		Itih1	inter-alpha trypsin inhibitor, heavy chain 1	#N/A
TCF3			4.49						Vwce	von Willebrand factor C and EGF domains	#N/A										Ifna15	predicted gene 12597	#N/A		Itih2	inter-alpha trypsin inhibitor, heavy chain 2	#N/A
			4.48						Wisp2	WNT1 inducible signaling pathway protein 2	#N/A										Ifna16	predicted gene 13280	#N/A		Itih3	inter-alpha trypsin inhibitor, heavy chain 3	#N/A
			4.47						Wisp3	WNT1 inducible signaling pathway protein 3	#N/A										Ifna2	interferon alpha 2	#N/A		Itih4	inter alpha-trypsin inhibitor, heavy chain 4	#N/A
C4orf18			4.46						Zp1	zona pellucida glycoprotein 1	#N/A										Ifna4	interferon alpha 4	#N/A		Kng1	kininogen 1	#N/A
			4.41						Zp2	zona pellucida glycoprotein 2	#N/A										Ifna5	interferon alpha 5	#N/A		Kng2	kininogen 2	#N/A
BNC1			4.4						Zp3	zona pellucida glycoprotein 3	#N/A										Ifna6	interferon alpha 6	#N/A		Ky	kyphoscoliosis peptidase	#N/A
MMP14			4.4						Zp3r	zona pellucida 3 receptor	#N/A										Ifna7	interferon alpha 7	#N/A		Leprel2	leprecan-like 2	#N/A
			4.4																		Ifna9	interferon alpha 9	#N/A		Lox	lysyl oxidase	#N/A
PRTN3			4.39																		Ifnab	interferon alpha B	#N/A		Loxl3	lysyl oxidase-like 3	#N/A
			4.39																		Ifnb1	interferon beta 1, fibroblast	#N/A		Loxl4	lysyl oxidase-like 4	#N/A
COL17A1			4.38																		Ifne	interferon epsilon	#N/A		Masp1	mannan-binding lectin serine peptidase 1	#N/A
			4.37																		Ifng	interferon gamma	#N/A		Mep1a	meprin 1 alpha	#N/A
TPM4			4.35																		Ifnk	interferon kappa	#N/A		Mep1b	meprin 1 beta	#N/A
CYP7B1			4.35																		Ifnz	interferon zeta	#N/A		Mmp11	matrix metallopeptidase 11	#N/A
SERPINB10			4.34																		Igf1	insulin-like growth factor 1	#N/A		Mmp12	matrix metallopeptidase 12	#N/A
ESM1			4.3																		Igf2	insulin-like growth factor 2	#N/A		Mmp15	matrix metallopeptidase 15	#N/A
COL3A1			4.27																		Ihh	Indian hedgehog	#N/A		Mmp17	matrix metallopeptidase 17	#N/A
CD300LF			4.25																		Il10	interleukin 10	#N/A		Mmp1a	matrix metallopeptidase 1a (interstitial collagenase)	#N/A
SRPX			4.22																		Il11	interleukin 11	#N/A		Mmp1b	matrix metallopeptidase 1b (interstitial collagenase)	#N/A
MMP2			4.22																		Il12a	interleukin 12a	#N/A		Mmp20	matrix metallopeptidase 20 (enamelysin)	#N/A
FKBP14			4.21																		Il13	interleukin 13	#N/A		Mmp21	matrix metallopeptidase 21	#N/A
			4.21																		Il15	interleukin 15	#N/A		Mmp23	matrix metallopeptidase 23	#N/A
			4.2																		Il16	interleukin 16	#N/A		Mmp24	matrix metallopeptidase 24	#N/A
HTRA1			4.17																		Il17a	interleukin 17A	#N/A		Mmp25	matrix metallopeptidase 25	#N/A
PRG4			4.14																		Il17c	interleukin 17C	#N/A		Mmp27	matrix metallopeptidase 27	#N/A
FIBIN			4.12																		Il17d	interleukin 17D	#N/A		Mmp7	matrix metallopeptidase 7	#N/A
TFPI2			4.11																		Il17f	interleukin 17F	#N/A		Mmp9	matrix metallopeptidase 9	#N/A
CUBN			4.11																		Il18	interleukin 18	#N/A		Mug2	C3 and PZP-like, alpha-2-macroglobulin domain containing 8	#N/A
			4.09																		Il19	interleukin 19	#N/A		Ogfod1	2-oxoglutarate and iron-dependent oxygenase domain containing 1	#N/A
			4.07																		Il1a	interleukin 1 alpha	#N/A		P4ha3	procollagen-proline, 2-oxoglutarate 4-dioxygenase (proline 4-hydroxylase), alpha polypeptide III	#N/A
STON1			4.05																		Il1f10	interleukin 1 family, member 10	#N/A		P4htm	prolyl 4-hydroxylase, transmembrane (endoplasmic reticulum)	#N/A
SDPR			4.05																		Il1f5	interleukin 1 family, member 5 (delta)	#N/A		Pappa	pregnancy-associated plasma protein A	#N/A
			4.04																		Il1f6	interleukin 1 family, member 6	#N/A		Pappa2	pappalysin 2	#N/A
ITM2C			4.01																		Il1f8	interleukin 1 family, member 8	#N/A		Pcsk6	proprotein convertase subtilisin/kexin type 6	#N/A
EVC2			4.01																		Il1f9	interleukin 1 family, member 9	#N/A		Plat	plasminogen activator, tissue	#N/A
MAS1			3.97																		Il1rn	interleukin 1 receptor antagonist	#N/A		Plau	plasminogen activator, urokinase	#N/A
			3.96																		Il2	interleukin 2	#N/A		Plg	plasminogen	#N/A
GPR35			3.94																		Il20	interleukin 20	#N/A		Plod3	procollagen-lysine, 2-oxoglutarate 5-dioxygenase 3	#N/A
COL5A2			3.92																		Il22	interleukin 22	#N/A		Prss1	protease, serine, 1 (trypsin 1)	#N/A
ACY3			3.91																		Il23a	interleukin 23, alpha subunit p19	#N/A		Prss12	protease, serine, 12 neurotrypsin (motopsin)	#N/A
SFTPD			3.87																		Il24	interleukin 24	#N/A		Prss2	protease, serine, 2	#N/A
FLRT2			3.86																		Il25	interleukin 25	#N/A		Prss3	protease, serine, 3	#N/A
			3.85																		Il3	interleukin 3	#N/A		Pzp	pregnancy zone protein	#N/A
LOC729085			3.83																		Il34	interleukin 34	#N/A		Serpina10	serine (or cysteine) peptidase inhibitor, clade A (alpha-1 antiproteinase, antitrypsin), member 10	#N/A
FKBP14			3.82																		Il4	interleukin 4	#N/A		Serpina11	serine (or cysteine) peptidase inhibitor, clade A (alpha-1 antiproteinase, antitrypsin), member 11	#N/A
			3.82																		Il5	interleukin 5	#N/A		Serpina12	serine (or cysteine) peptidase inhibitor, clade A (alpha-1 antiproteinase, antitrypsin), member 12	#N/A
SERPINH1			3.82																		Il6	interleukin 6	#N/A		Serpina1a	serine (or cysteine) peptidase inhibitor, clade A, member 1A	#N/A
RHOU			3.81																		Il7	interleukin 7	#N/A		Serpina1b	serine (or cysteine) preptidase inhibitor, clade A, member 1B	#N/A
			3.8																		Il9	interleukin 9	#N/A		Serpina1c	serine (or cysteine) peptidase inhibitor, clade A, member 1C	#N/A
DGAT2			3.8																		Inha	inhibin alpha	#N/A		Serpina1d	serine (or cysteine) peptidase inhibitor, clade A, member 1D	#N/A
			3.8																		Inhba	inhibin beta-A	#N/A		Serpina1e	serine (or cysteine) peptidase inhibitor, clade A, member 1E	#N/A
NCF1			3.78																		Inhbc	inhibin beta-C	#N/A		Serpina1f	serine (or cysteine) peptidase inhibitor, clade A, member 1F	#N/A
SERPINB1			3.78																		Inhbe	inhibin beta E	#N/A		Serpina3a	serine (or cysteine) peptidase inhibitor, clade A, member 3A	#N/A
C8orf42			3.76																		Ins1	insulin I	#N/A		Serpina3b	serine (or cysteine) peptidase inhibitor, clade A, member 3B	#N/A
TLL1			3.76																		Ins2	insulin II	#N/A		Serpina3c	serine (or cysteine) peptidase inhibitor, clade A, member 3C	#N/A
LGALS3BP			3.74																		Insl3	insulin-like 3	#N/A		Serpina3f	serine (or cysteine) peptidase inhibitor, clade A, member 3F	#N/A
			3.73																		Insl5	insulin-like 5	#N/A		Serpina3g	serine (or cysteine) peptidase inhibitor, clade A, member 3G	#N/A
ITGB5			3.72																		Insl6	insulin-like 6	#N/A		Serpina3k	serine (or cysteine) peptidase inhibitor, clade A, member 3K	#N/A
			3.71																		Ism1	isthmin 1 homolog (zebrafish)	#N/A		Serpina3m	serine (or cysteine) peptidase inhibitor, clade A, member 3M	#N/A
			3.71																		Ism2	isthmin 2 homolog (zebrafish)	#N/A		Serpina3n	serine (or cysteine) peptidase inhibitor, clade A, member 3N	#N/A
			3.7																		Kitl	kit ligand	#N/A		Serpina5	serine (or cysteine) peptidase inhibitor, clade A, member 5	#N/A
			3.68																		Lefty1	left right determination factor 1	#N/A		Serpina6	serine (or cysteine) peptidase inhibitor, clade A, member 6	#N/A
TGIF1			3.67																		Lefty2	left-right determination factor 2	#N/A		Serpina7	serine (or cysteine) peptidase inhibitor, clade A (alpha-1 antiproteinase, antitrypsin), member 7	#N/A
			3.67																		Lif	leukemia inhibitory factor	#N/A		Serpina9	serine (or cysteine) peptidase inhibitor, clade A (alpha-1 antiproteinase, antitrypsin), member 9	#N/A
RFTN2			3.65																		Lta	lymphotoxin A	#N/A		Serpinb11	serine (or cysteine) peptidase inhibitor, clade B (ovalbumin), member 11	#N/A
PMEPA1			3.63																		Ltb	lymphotoxin B	#N/A		Serpinb12	serine (or cysteine) peptidase inhibitor, clade B (ovalbumin), member 12	#N/A
			3.62																		Megf10	multiple EGF-like-domains 10	#N/A		Serpinb13	serine (or cysteine) peptidase inhibitor, clade B (ovalbumin), member 13	#N/A
LYZ			3.62																		Megf8	multiple EGF-like-domains 8	#N/A		Serpinb1a	serine (or cysteine) peptidase inhibitor, clade B, member 1a	#N/A
			3.6																		Megf9	multiple EGF-like-domains 9	#N/A		Serpinb1b	serine (or cysteine) peptidase inhibitor, clade B, member 1b	#N/A
ACY3			3.6																		Mstn	myostatin	#N/A		Serpinb1c	serine (or cysteine) peptidase inhibitor, clade B, member 1c	#N/A
ABCA1			3.6																		Ngf	nerve growth factor	#N/A		Serpinb2	serine (or cysteine) peptidase inhibitor, clade B, member 2	#N/A
FAT1			3.58																		Nodal	nodal	#N/A		Serpinb3a	serine (or cysteine) peptidase inhibitor, clade B (ovalbumin), member 3A	#N/A
FKBP7			3.57																		Nrg1	neuregulin 1	#N/A		Serpinb3b	serine (or cysteine) peptidase inhibitor, clade B (ovalbumin), member 3B	#N/A
			3.56																		Nrg2	neuregulin 2	#N/A		Serpinb3c	serine (or cysteine) peptidase inhibitor, clade B, member 3C	#N/A
FSTL1			3.54																		Nrg3	neuregulin 3	#N/A		Serpinb3d	serine (or cysteine) peptidase inhibitor, clade B (ovalbumin), member 3D	#N/A
SLIT2			3.53																		Nrg4	neuregulin 4	#N/A		Serpinb6a	serine (or cysteine) peptidase inhibitor, clade B, member 6a	#N/A
			3.53																		Nrtn	neurturin	#N/A		Serpinb6b	serine (or cysteine) peptidase inhibitor, clade B, member 6b	#N/A
DST			3.52																		Ntf5	neurotrophin 5	#N/A		Serpinb6c	serine (or cysteine) peptidase inhibitor, clade B, member 6c	#N/A
			3.52																		Osm	oncostatin M	#N/A		Serpinb6d	serine (or cysteine) peptidase inhibitor, clade B, member 6d	#N/A
IGFBP5			3.52																		Pdgfa	platelet derived growth factor, alpha	#N/A		Serpinb7	serine (or cysteine) peptidase inhibitor, clade B, member 7	#N/A
SH3KBP1			3.51																		Pdgfb	platelet derived growth factor, B polypeptide	#N/A		Serpinb8	serine (or cysteine) peptidase inhibitor, clade B, member 8	#N/A
MAPK6			3.51																		Pdgfc	platelet-derived growth factor, C polypeptide	#N/A		Serpinb9	serine (or cysteine) peptidase inhibitor, clade B, member 9	#N/A
PLTP			3.49																		Pdgfd	platelet-derived growth factor, D polypeptide	#N/A		Serpinb9b	serine (or cysteine) peptidase inhibitor, clade B, member 9b	#N/A
2010-09-01			3.48																		Pf4	platelet factor 4	#N/A		Serpinb9c	serine (or cysteine) peptidase inhibitor, clade B, member 9c	#N/A
ROBO1			3.48																		Pgf	placental growth factor	#N/A		Serpinb9d	serine (or cysteine) peptidase inhibitor, clade B, member 9d	#N/A
			3.47																		Pik3ip1	phosphoinositide-3-kinase interacting protein 1	#N/A		Serpinb9e	serine (or cysteine) peptidase inhibitor, clade B, member 9e	#N/A
CD207			3.47																		Ppbp	pro-platelet basic protein	#N/A		Serpinb9f	serine (or cysteine) peptidase inhibitor, clade B, member 9f	#N/A
			3.47																		Prl	prolactin	#N/A		Serpinb9g	serine (or cysteine) peptidase inhibitor, clade B, member 9g	#N/A
LGALS3BP			3.44																		Prl2a1	prolactin family 2, subfamily a, member 1	#N/A		Serpinc1	serine (or cysteine) peptidase inhibitor, clade C (antithrombin), member 1	#N/A
			3.44																		Prl2b1	prolactin family 2, subfamily b, member 1	#N/A		Serpind1	serine (or cysteine) peptidase inhibitor, clade D, member 1	#N/A
MYCN			3.43																		Prl2c1	Prolactin family 2, subfamily c, member 1	#N/A		Serpine1	serine (or cysteine) peptidase inhibitor, clade E, member 1	#N/A
ASAP1			3.42																		Prl2c2	prolactin family 2, subfamily c, member 2	#N/A		Serpine3	serpin peptidase inhibitor, clade E (nexin, plasminogen activator inhibitor type 1), member 3	#N/A
ECM2			3.41																		Prl2c3	prolactin family 2, subfamily c, member 3	#N/A		Serpinf1	serine (or cysteine) peptidase inhibitor, clade F, member 1	#N/A
			3.4																		Prl2c4	prolactin family 2, subfamily c, member 4	#N/A		Serping1	serine (or cysteine) peptidase inhibitor, clade G, member 1	#N/A
MRC1			3.39																		Prl2c5	prolactin family 2, subfamily c, member 5	#N/A		Serpini2	serine (or cysteine) peptidase inhibitor, clade I, member 2	#N/A
EMILIN2			3.39																		Prl3a1	prolactin family 3, subfamily a, member 1	#N/A		Slpi	secretory leukocyte peptidase inhibitor	#N/A
			3.38																		Prl3b1	prolactin family 3, subfamily b, member 1	#N/A		Spam1	sperm adhesion molecule 1	#N/A
LSP1			3.38																		Prl3c1	prolactin family 3, subfamily c, member 1	#N/A		Spinkl	RIKEN cDNA 9530002K18 gene	#N/A
TIMP1			3.37																		Prl3d1	prolactin family 3, subfamily d, member 1	#N/A		Stfa1	stefin A1	#N/A
ASTL			3.37																		Prl3d2	prolactin family 3, subfamily d, member 1	#N/A		Stfa2	stefin A2	#N/A
SERPINB10			3.37																		Prl3d3	prolactin family 3, subfamily d, member 3	#N/A		Stfa2l1	stefin A2 like 1	#N/A
UCMA			3.34																		Prl4a1	prolactin family 4, subfamily a, member 1	#N/A		Stfa3	stefin A3	#N/A
			3.34																		Prl5a1	prolactin family 5, subfamily a, member 1	#N/A		Sulf2	sulfatase 2	#N/A
SH3KBP1			3.33																		Prl6a1	prolactin family 6, subfamily a, member 1	#N/A		Tgm4	transglutaminase 4 (prostate)	#N/A
CDC42EP3			3.32																		Prl7a1	prolactin family 7, subfamily a, member 1	#N/A		Tgm7	transglutaminase 7	#N/A
			3.32																		Prl7a2	prolactin family 7, subfamily a, member 2	#N/A		Timp2	tissue inhibitor of metalloproteinase 2	#N/A
PHF6			3.32																		Prl7b1	prolactin family 7, subfamily b, member 1	#N/A		Timp3	tissue inhibitor of metalloproteinase 3	#N/A
TGFBR2			3.31																		Prl7c1	prolactin family 7, subfamily c, member 1	#N/A		Timp4	tissue inhibitor of metalloproteinase 4	#N/A
ODC1			3.3																		Prl7d1	prolactin family 7, subfamily d, member 1	#N/A		Tll2	tolloid-like 2	#N/A
DIRAS2			3.29																		Prl8a1	prolactin family 8, subfamily a, member 1	#N/A		Tmprss15	protease, serine, 7 (enterokinase)	#N/A
ROR2			3.29																		Prl8a2	prolactin family 8, subfamily a, member 2	#N/A		Tpbpa	trophoblast specific protein alpha	#N/A
TUBB2B			3.28																		Prl8a6	prolactin family 8, subfamily a, member 6	#N/A		Tpbpb	trophoblast specific protein beta	#N/A
MSI1			3.26																		Prl8a8	prolactin family 8, subfamily a, member 81	#N/A		Try10	trypsin 10	#N/A
KERA			3.26																		Prl8a9	prolactin family8, subfamily a, member 9	#N/A		Try4	trypsin 4	#N/A
SMOX			3.26																		Pspn	persephin	#N/A		Try5	trypsin 5	#N/A
FLRT3			3.24																		Ptn	pleiotrophin	#N/A		U06147	cDNA sequence U06147	#N/A
SERPINB10			3.24																		Rptn	repetin	#N/A
MRC1			3.24																		S100a1	S100 calcium binding protein A1	#N/A
			3.23																		S100a11	S100 calcium binding protein A11 (calgizzarin)	#N/A
			3.22																		S100a14	S100 calcium binding protein A14	#N/A
			3.21																		S100a16	S100 calcium binding protein A16	#N/A
PPP1R14B			3.2																		S100a2	S100 calcium binding protein A2	#N/A
			3.19																		S100a3	S100 calcium binding protein A3	#N/A
			3.17																		S100a5	S100 calcium binding protein A5	#N/A
			3.17																		S100a6	S100 calcium binding protein A6 (calcyclin)	#N/A
BMP1			3.17																		S100a7a	S100 calcium binding protein A7A	#N/A
TMEM35			3.17																		S100a8	S100 calcium binding protein A8 (calgranulin A)	#N/A
LMO1			3.17																		S100a9	S100 calcium binding protein A9 (calgranulin B)	#N/A
PRG3			3.16																		S100b	S100 protein, beta polypeptide, neural	#N/A
COL7A1			3.16																		S100g	S100 calcium binding protein G	#N/A
FN1			3.15																		Scube1	signal peptide, CUB domain, EGF-like 1	#N/A
KLF10			3.13																		Scube2	signal peptide, CUB domain, EGF-like 2	#N/A
FGD6			3.12																		Scube3	signal peptide, CUB domain, EGF-like 3	#N/A
DST			3.12																		Sfrp1	secreted frizzled-related protein 1	#N/A
ITGBL1			3.12																		Sfrp5	secreted frizzled-related sequence protein 5	#N/A
PLEKHG4B			3.1																		Shh	sonic hedgehog	#N/A
ZNF469			3.09																		Tchhl1	trichohyalin-like 1	#N/A
			3.08																		Tdgf1	teratocarcinoma-derived growth factor 1	#N/A
SERPINE2			3.08																		Tgfa	transforming growth factor alpha	#N/A
			3.07																		Tgfb3	transforming growth factor, beta 3	#N/A
			3.07																		Thpo	thrombopoietin	#N/A
CIRBP			3.06																		Tnf	tumor necrosis factor	#N/A
			3.06																		Tnfsf11	tumor necrosis factor (ligand) superfamily, member 11	#N/A
SERPINE2			3.06																		Tnfsf12tnfsf13	cDNA sequence BC096441	#N/A
RNF125			3.06																		Tnfsf13	tumor necrosis factor (ligand) superfamily, member 13	#N/A
RRAS2			3.06																		Tnfsf13b	tumor necrosis factor (ligand) superfamily, member 13b	#N/A
GPR177			3.06																		Tnfsf14	tumor necrosis factor (ligand) superfamily, member 14	#N/A
RGS10			3.05																		Tnfsf15	tumor necrosis factor (ligand) superfamily, member 15	#N/A
			3.04																		Tnfsf18	tumor necrosis factor (ligand) superfamily, member 18	#N/A
ADORA3			3.04																		Tnfsf4	tumor necrosis factor (ligand) superfamily, member 4	#N/A
COL12A1			3.04																		Tnfsf8	tumor necrosis factor (ligand) superfamily, member 8	#N/A
CD207			3.03																		Tnfsf9	tumor necrosis factor (ligand) superfamily, member 9	#N/A
QKI			3.02																		Tpo	thyroid peroxidase	#N/A
PIM3			3.01																		Vegfa	vascular endothelial growth factor A	#N/A
ASAP1			2.98																		Vegfb	vascular endothelial growth factor B	#N/A
COL4A6			2.98																		Vwc2	von Willebrand factor C domain containing 2	#N/A
C13orf15			2.98																		Wfikkn1	WAP, FS, Ig, KU, and NTR-containing protein 1	#N/A
CLDN4			2.97																		Wfikkn2	WAP, follistatin/kazal, immunoglobulin, kunitz and netrin domain containing 2	#N/A
NINL			2.97																		Wif1	Wnt inhibitory factor 1	#N/A
G0S2			2.95																		Wnt1	wingless-related MMTV integration site 1	#N/A
DSE			2.95																		Wnt10a	wingless related MMTV integration site 10a	#N/A
CEACAM5			2.95																		Wnt10b	wingless related MMTV integration site 10b	#N/A
SFTPD			2.95																		Wnt11	wingless-related MMTV integration site 11	#N/A
			2.95																		Wnt16	wingless-related MMTV integration site 16	#N/A
C5orf4			2.94																		Wnt2	wingless-related MMTV integration site 2	#N/A
FZD2			2.94																		Wnt2b	wingless related MMTV integration site 2b	#N/A
			2.94																		Wnt3	wingless-related MMTV integration site 3	#N/A
TLR7			2.93																		Wnt3a	wingless-related MMTV integration site 3A	#N/A
			2.93																		Wnt4	wingless-related MMTV integration site 4	#N/A
			2.92																		Wnt5a	wingless-related MMTV integration site 5A	#N/A
NPL			2.92																		Wnt5b	wingless-related MMTV integration site 5B	#N/A
MATN2			2.91																		Wnt6	wingless-related MMTV integration site 6	#N/A
			2.91																		Wnt7a	wingless-related MMTV integration site 7A	#N/A
			2.9																		Wnt7b	wingless-related MMTV integration site 7B	#N/A
			2.89																		Wnt8a	wingless-related MMTV integration site 8A	#N/A
C1QB			2.87																		Wnt8b	wingless related MMTV integration site 8b	#N/A
SRPX2			2.86																		Wnt9a	wingless-type MMTV integration site 9A	#N/A
KAL1			2.86																		Wnt9b	wingless-type MMTV integration site 9B	#N/A
TNFAIP8L2			2.86																		Xcl1	chemokine (C motif) ligand 1	#N/A
PLXND1			2.86
MPEG1			2.86
CXorf21			2.85
GLUL			2.85
GALNTL4			2.85
ISG15			2.84
RSU1			2.83
GMDS			2.82
FHL1			2.82
PLXNB2			2.82
GAL3ST4			2.82
			2.81
			2.81
MTHFR			2.81
			2.81
VIM			2.8
SRGN			2.8
FAP			2.8
VWC2L			2.79
IMPA2			2.78
AADAC			2.77
TOP2B			2.77
			2.77
DSP			2.76
PTPRS			2.76
			2.76
RERG			2.76
ELK3			2.75
PKIA			2.74
EVC			2.74
			2.73
SMAD1			2.71
LTA4H			2.71
GLT25D2			2.71
C10orf54			2.69
			2.69
CYP26A1			2.69
RTL1			2.69
SLC11A1			2.68
GPR34			2.68
			2.68
FERMT1			2.65
SLC43A2			2.65
TMEM67			2.65
PTPLAD2			2.64
			2.64
CKAP4			2.64
			2.64
			2.64
TUBB6			2.63
ACP5			2.62
			2.62
VIM			2.62
RCN1			2.62
			2.61
MIDN			2.61
RHOF			2.6
			2.6
			2.6
			2.59
			2.58
ST8SIA2			2.58
TSPAN3			2.58
GPM6B			2.58
SAMSN1			2.57
			2.57
SULT2B1			2.56
TLR7			2.56
TNFSF10			2.56
			2.55
ANXA1			2.55
SCG2			2.55
			2.55
LRIG3			2.54
TUBA1B			2.53
VRK2			2.53
			2.52
ABHD12			2.51
THBS4			2.51
ZNF518B			2.51
OASL			2.51
			2.51
MMP28			2.51
PTPLAD2			2.5
NIN			2.5
			2.49
VSIG4			2.48
TYROBP			2.48
BCAN			2.48
			2.48
ARHGAP24			2.46
			2.46
			2.46
XKR8			2.46
			2.45
LAMB1			2.45
			2.45
			2.44
			2.44
ANXA2			2.44
C1QTNF5			2.43
LITAF			2.43
			2.43
RIC3			2.43
			2.42
			2.41
IKIP			2.41
CYP7B1			2.41
GNAI2			2.4
			2.4
JAG1			2.4
TMEM154			2.39
MOSPD1			2.39
WISP1			2.38
LY86			2.38
			2.38
			2.37
			2.36
			2.36
FAM110B			2.36
NTF3			2.36
MS4A12			2.36
			2.36
GPR87			2.36
AADAC			2.35
			2.35
			2.35
LGMN			2.35
RCN1			2.35
CRTAP			2.34
NCR2			2.34
DCX			2.34
			2.33
OTOA			2.33
			2.33
LAMB4			2.33
GJB6			2.33
			2.32
			2.32
GALNT2			2.31
NT5C3			2.31
CLSTN1			2.31
FAM26D			2.31
PLEKHO1			2.31
STMN3			2.31
DUOX1			2.31
			2.31
			2.3
			2.3
			2.3
ZC4H2			2.3
DLGAP4			2.3
GPC4			2.3
			2.3
			2.3
UPF3B			2.3
			2.29
SCHIP1			2.29
GPR137B			2.29
DSP			2.29
			2.29
ABHD3			2.28
CYP2A13			2.28
KREMEN1			2.28
GLT8D4			2.28
FBLIM1			2.27
MAPK12			2.27
BMP1			2.27
FAM89B			2.27
			2.27
STEAP1			2.26
			2.26
			2.25
TGIF1			2.25
SLC12A4			2.25
SH3PXD2B			2.24
TNS3			2.24
SLK			2.24
ARRDC3			2.24
CD5L			2.24
MPP1			2.23
PLOD1			2.23
			2.23
DSC2			2.22
RNF11			2.22
GALNT3			2.22
C1QC			2.22
			2.21
ZBTB1			2.21
			2.21
PTPN6			2.21
S100A10			2.21
FGFR1			2.21
			2.2
			2.2
EPYC			2.2
			2.2
KIAA0802			2.19
			2.19
			2.19
			2.19
FAM49B			2.19
TNIK			2.18
TNFRSF6B			2.18
			2.18
FAM101A			2.18
ATHL1			2.18
TM6SF2			2.17
KRT8			2.17
PXDN			2.17
CHN1			2.17
DAPL1			2.17
OSGIN2			2.17
			2.16
			2.16
			2.16
SLC37A2			2.16
RGS19			2.16
CHST11			2.15
RAD1			2.15
UBTF			2.15
			2.15
			2.14
LIMA1			2.14
			2.14
			2.14
P4HA2			2.14
TUBA1B			2.14
KRT24			2.14
CD109			2.13
			2.13
RTL1			2.13
CTSB			2.13
GNA12			2.13
			2.13
PKM2			2.13
GLUL			2.12
ADAMTS12			2.12
MARCH8			2.12
ARHGEF10			2.12
PDLIM7			2.12
			2.12
MMP13			2.12
LPIN2			2.12
TM6SF2			2.11
ITGAV			2.11
			2.11
C1orf53			2.11
HSD17B14			2.11
PEG10			2.11
HTRA3			2.11
			2.11
TCF3			2.1
B4GALT3			2.1
CCNJ			2.1
			2.1
			2.1
APH1A			2.1
			2.1
DCN			2.09
			2.09
ACTG1			2.09
ABCG2			2.09
			2.09
			2.09
			2.09
IGSF6			2.09
			2.08
			2.08
SDC1			2.08
FAM89A			2.08
SEC23A			2.08
MXRA8			2.08
C9orf3			2.08
EEPD1			2.08
MARCKS			2.08
			2.08
TTYH2			2.07
GPX8			2.07
PCOLCE2			2.06
PDLIM5			2.06
EPB41L3			2.06
			2.05
NINL			2.05
			2.05
			2.05
BCO2			2.05
			2.04
			2.04
RBKS			2.04
TWSG1			2.03
LUZP1			2.03
GPR137B			2.02
			2.02
			2.02
			2.02
			2.02
CNDP1			2.01
CSTB			2.01
NAT11			2.01
ADFP			2
ABLIM1			2
			2
YARS			-2
			-2
DNAJB9			-2
TESK2			-2
RBPMS2			-2
			-2
MTHFD2			-2.01
			-2.01
RP11-544M22.4			-2.01
FBP1			-2.01
			-2.01
ACADS			-2.01
			-2.01
CCDC125			-2.01
SORT1			-2.01
GMPR			-2.01
NRN1			-2.01
SEC11C			-2.02
EML1			-2.02
			-2.02
SGTB			-2.02
SIAE			-2.02
			-2.02
GCAT			-2.02
PYGM			-2.02
NARS			-2.02
			-2.02
			-2.03
POLE			-2.03
			-2.03
PDZD8			-2.03
FGF12			-2.03
			-2.03
			-2.04
SCNN1B			-2.04
MYH3			-2.04
MYH6			-2.04
HES1			-2.04
GDPD3			-2.04
			-2.04
ATP2A3			-2.05
HARS			-2.05
GRHL3			-2.05
MARS			-2.05
			-2.05
AOAH			-2.05
			-2.05
MUC4			-2.05
IDH3G			-2.06
			-2.06
			-2.06
			-2.07
TMEM79			-2.07
			-2.07
GTPBP2			-2.07
SAT2			-2.07
CTSG			-2.07
PDCD4			-2.07
AFMID			-2.08
RHCG			-2.08
PCP4			-2.08
			-2.08
			-2.08
			-2.08
CSPG5			-2.08
			-2.09
STK39			-2.09
CARS			-2.09
CNN1			-2.1
			-2.1
INMT			-2.1
			-2.1
			-2.1
GNPAT			-2.1
BAIAP2L1			-2.1
AGR3			-2.1
ACOT11			-2.11
PQLC3			-2.11
TJP1			-2.11
YARS			-2.11
GLTP			-2.11
			-2.11
DGKZ			-2.11
GNGT1			-2.11
PDXK			-2.12
			-2.12
			-2.12
CPNE4			-2.12
CYP39A1			-2.12
CMAS			-2.12
TFCP2L1			-2.13
CYB5A			-2.13
EHF			-2.13
			-2.13
BRCA1			-2.13
hCG_1773238			-2.14
STARD10			-2.14
			-2.14
IGFALS			-2.14
PEBP4			-2.15
			-2.15
FKBP11			-2.15
			-2.15
STXBP6			-2.15
SC4MOL			-2.15
SOSTDC1			-2.16
C18orf22			-2.16
KIAA0802			-2.16
			-2.16
UMOD			-2.16
UMOD			-2.17
TECTA			-2.17
FAM83C			-2.17
GOT1			-2.17
HSPA8			-2.17
KRTAP4-3			-2.18
NHLRC3			-2.18
			-2.18
			-2.18
PPIL6			-2.19
			-2.19
			-2.19
EPB41L4A			-2.19
TEX2			-2.2
HSPA8			-2.2
			-2.2
GAK			-2.2
			-2.2
ALDH1A1			-2.21
SYT16			-2.21
SLC43A1			-2.21
			-2.21
SHMT2			-2.21
			-2.21
OSBP			-2.21
			-2.22
ARL11			-2.22
			-2.22
CTSL2			-2.22
GJB7			-2.22
TMEM181			-2.24
PEBP1			-2.24
CBX8			-2.25
GMNN			-2.25
			-2.25
MAL			-2.26
RPH3A			-2.26
RHOF			-2.26
IL1B			-2.26
CHIT1			-2.26
CANT1			-2.26
WASF1			-2.27
WARS			-2.27
NR3C2			-2.27
ANLN			-2.28
RAD50			-2.28
PLSCR1			-2.28
			-2.28
			-2.28
			-2.29
EPS8			-2.29
FAM73A			-2.29
PREPL			-2.29
LOC440498			-2.29
			-2.29
TARS			-2.29
PTPRJ			-2.29
HIAT1			-2.3
GRHL1			-2.3
			-2.31
DNAJC3			-2.31
SATB1			-2.31
PGCP			-2.31
PON2			-2.31
LOC100131696			-2.32
NEXN			-2.32
PBX3			-2.32
SLC39A9			-2.32
FAM3C			-2.33
KLHDC7A			-2.33
NMRAL1			-2.33
F10			-2.34
			-2.34
TECTA			-2.34
			-2.34
WFDC2			-2.36
			-2.36
PHLDA2			-2.36
MALL			-2.36
ST8SIA1			-2.36
			-2.36
			-2.37
PCK2			-2.37
			-2.37
FAH			-2.37
SGMS1			-2.37
MR1			-2.37
LNX1			-2.38
MYO1E			-2.38
PSPH			-2.38
HDLBP			-2.38
SLC41A1			-2.38
			-2.39
			-2.39
SLC4A4			-2.39
DNAJA4			-2.39
			-2.39
ISYNA1			-2.39
			-2.4
DHFR			-2.4
TMEM213			-2.4
			-2.41
CYP51A1			-2.41
			-2.41
YARS			-2.41
			-2.41
SNTB1			-2.41
			-2.42
MFSD6L			-2.42
SARDH			-2.42
KRT5			-2.42
			-2.42
			-2.43
			-2.43
ELOVL7			-2.43
HYOU1			-2.43
NFKBIA			-2.43
PRR5			-2.43
MYLK			-2.44
SULT6B1			-2.44
PLA2G4C			-2.44
PSMB8			-2.44
UMOD			-2.45
CALR			-2.45
ALDH1A1			-2.45
IARS			-2.46
WSB1			-2.46
			-2.46
SLC35D2			-2.46
LITAF			-2.47
C7orf38			-2.47
LOC440335			-2.48
			-2.49
CYP46A1			-2.49
			-2.5
B4GALT1			-2.5
RASL11B			-2.5
			-2.5
RELN			-2.51
FMO3			-2.51
ACY3			-2.51
NANS			-2.51
			-2.51
IL20RB			-2.52
PI3			-2.53
OXCT1			-2.53
UAP1			-2.53
GALNT12			-2.54
RGS2			-2.54
			-2.54
TMEM38A			-2.54
XDH			-2.55
OGDHL			-2.55
ATP6V1A			-2.55
			-2.55
ANXA2			-2.55
DKFZP564O0823			-2.55
			-2.55
			-2.56
UBC			-2.56
			-2.56
ATP6V1G3			-2.57
			-2.57
CYP2A13			-2.57
METTL7A			-2.58
PSCA			-2.58
MAPRE3			-2.58
KRT5			-2.58
PLCXD2			-2.58
HLA-E			-2.58
CD200			-2.59
SSTR2			-2.6
MYH11			-2.6
			-2.6
GPX1			-2.61
UPK3A			-2.61
QRICH2			-2.61
EML2			-2.61
MYBPH			-2.62
NAP5			-2.62
			-2.62
			-2.62
			-2.64
LITAF			-2.65
CIB1			-2.66
DEPDC7			-2.66
SDF2L1			-2.66
TMEM66			-2.66
ATP6AP1			-2.68
			-2.69
ENPP5			-2.7
ATP6V1B2			-2.7
			-2.71
RHCG			-2.72
FAM55B			-2.72
			-2.73
SCD			-2.74
OSR1			-2.74
GCLC			-2.75
CA2			-2.75
RTN2			-2.75
			-2.75
WFDC1			-2.76
CA2			-2.76
CPM			-2.77
			-2.77
SC5DL			-2.78
			-2.79
HCRTR2			-2.79
UMOD			-2.79
DDC			-2.79
GFPT2			-2.8
UMOD			-2.8
TFCP2L1			-2.8
GCM1			-2.81
NEXN			-2.81
DHTKD1			-2.82
			-2.82
CYP2C8			-2.82
CAND2			-2.85
ENO3			-2.85
			-2.85
TRIM66			-2.85
PRR5			-2.85
			-2.87
			-2.88
DERL2			-2.9
			-2.91
ECOP			-2.92
NDRG1			-2.93
SCGN			-2.94
CDC42EP2			-2.94
FBP2			-2.94
CDKN1B			-2.95
KIT			-2.95
PDE1C			-2.95
			-2.96
			-2.97
TRDN			-2.97
ATP1B2			-2.98
KIAA0319L			-2.99
			-2.99
			-2.99
			-3
			-3.01
			-3.02
HIGD1A			-3.04
NMRAL1			-3.05
GSTP1			-3.06
			-3.06
PDGFRL			-3.07
DSCAML1			-3.08
FCGBP			-3.08
GSTA4			-3.08
ABCA1			-3.09
SULT1C4			-3.09
			-3.1
			-3.1
BAI1			-3.1
OAT			-3.11
PHYH			-3.11
			-3.11
C1QTNF2			-3.12
			-3.12
AIFM3			-3.13
			-3.14
PSPH			-3.16
			-3.16
TMEM55A			-3.16
TNIP3			-3.17
			-3.17
BCAT1			-3.19
SLC25A33			-3.19
TNXB			-3.2
SPR			-3.2
PDLIM5			-3.23
ELFN1			-3.23
CA7			-3.23
LPAR1			-3.23
ACCN1			-3.24
			-3.24
SLC16A1			-3.24
HSP90B1			-3.24
ASNS			-3.27
FYN			-3.27
PRR5			-3.28
ACOX3			-3.29
			-3.3
CTSS			-3.3
ACSBG1			-3.3
			-3.32
			-3.32
ENPP1			-3.33
SELENBP1			-3.33
SH3YL1			-3.33
			-3.33
			-3.35
MLF1			-3.35
SFXN2			-3.36
			-3.36
			-3.37
FRK			-3.37
			-3.37
			-3.38
IQGAP2			-3.4
TMEM66			-3.4
ACSBG1			-3.42
ELOVL4			-3.46
			-3.5
CYP2C8			-3.5
			-3.51
PFKFB1			-3.52
NQO1			-3.52
ADSSL1			-3.55
DEPDC7			-3.57
PRPH			-3.59
HOPX			-3.59
			-3.59
HK2			-3.6
ACSBG1			-3.6
			-3.6
			-3.61
			-3.63
C1orf51			-3.64
			-3.65
FADS6			-3.67
			-3.71
			-3.71
CYP2A13			-3.74
PEBP1			-3.74
			-3.75
SLC25A29			-3.76
CYP4F22			-3.85
			-3.9
FAAH			-3.9
			-3.9
SPON2			-3.91
C1QTNF1			-3.95
SLC2A11			-3.96
			-4.02
AMPD1			-4.08
MUC2			-4.11
			-4.11
AIFM2			-4.11
ACSS1			-4.11
PCOLCE2			-4.12
AACS			-4.15
OLFML2B			-4.15
HSPB1			-4.16
			-4.17
SLC25A4			-4.17
MOXD1			-4.19
ACTN3			-4.2
PTPLA			-4.21
GABRG1			-4.28
ACSBG2			-4.3
ACTC1			-4.39
			-4.4
			-4.42
UMOD			-4.45
			-4.46
PCOLCE			-4.46
			-4.47
			-4.55
LDB3			-4.56
			-4.59
LGALS1			-4.59
ELMOD1			-4.59
			-4.64
CHRDL1			-4.66
			-4.68
FUT9			-4.73
			-4.77
ATP2A1			-4.79
			-4.84
			-4.85
GPRC6A			-4.85
GNG13			-4.88
CRYAB			-4.92
			-4.99
CASP7			-5.01
HYOU1			-5.03
ADIPOQ			-5.05
NNMT			-5.06
TGFBR2			-5.12
MYH2			-5.17
ALOXE3			-5.3
			-5.43
PRSS27			-5.46
FBN1			-5.53
PSAT1			-5.57
MMRN1			-5.65
DMBT1			-5.69
DNAJC3			-5.72
OGN			-5.96
			-5.97
POSTN			-6.02
TRIM72			-6.04
			-6.07
CDO1			-6.16
SMPX			-6.18
EPHA5			-6.32
			-6.39
OCM2			-6.41
CARTPT			-6.43
PKM2			-6.5
GATM			-6.6
KRT12			-6.83
POSTN			-6.9
KRT5			-6.9
PCSK9			-6.9
MYH4			-6.96
			-6.98
MAT2A			-7.1
TTN			-7.11
PTGES			-7.27
			-7.34
			-7.36
DHRS7C			-7.55
MYOM1			-7.57
			-7.91
LECT2			-8.05
CRYBA2			-8.07
			-8.16
OLFML2A			-8.49
FCGBP			-8.49
AK1			-8.54
PLCH1			-8.82
ZPLD1			-9.03
MYH13			-9.08
LGALS1			-9.1
			-9.23
CLEC3B			-9.29
MYH1			-9.29
KBTBD10			-9.34
PTGDS			-9.88
MYOZ1			-10.02
METTL7A			-10.22
			-10.46
			-11.6
			-11.77
PFKM			-11.84
SLC14A2			-11.87
TPM3			-11.87
SRL			-11.87
LDLR			-12.3
MYH1			-13.47
MYH7			-13.53
			-13.54
			-13.64
MYL1			-14.37
CASQ1			-14.97
WFDC8			-15.32
MYBPC2			-15.38
ACTA2			-16.94
PTGS1			-17.41
PEBP4			-18.3
MYH3			-18.38
MYOM2			-18.5
			-18.7
CAPSL			-18.91
TTN			-21.94
ADH4			-22.76
PVALB			-24.21
MYL1			-24.63
NEB			-25.24
CKM			-25.4
GRIK2			-25.91
PVALB			-26.16
TPM1			-26.46
ACTC1			-30.52
			-31.45
ACTA1			-32.13
APOD			-32.16
ACTA2			-33.07
			-33.11
TPM1			-34.41
TNNC2			-34.82
PVALB			-35.28
TNNT3			-35.36
MYOZ1			-37.17
			-37.49
			-38.22
			-38.27
ABI3BP			-40.36
PTX3			-40.44
			-41.06
MYLPF			-44.11
TNNI2			-47.16
PVALB			-48.29
ACTA1			-57.07
DHRS4			-64
			-81.7
NNMT			-87.21
FCGBP			-207.36
NNMT			-291.66
FCGBP			-320.57
LGALS3			-538.23
LGALS8			-646.36
LGALS3			-854.33
			-1662.77
