# Supplementary material for: Matrisomal components involved in regenerative wound healing in axolotl and Acomys: implications for biomaterial development
Source: Royal Society of Chemistry journal article supplement (doi:10.1039/d3bm00835e), 2023-01-01
Supplement: d3bm00835e7.xlsx [file d3bm00835e7.xlsx]

## Sheet: 1. Brant vs Monaghan match
Acomys matrisome matches and GAG matches on day 7						Axolotl	Acomys
Core matrisome - collagens	gene name	Day 7 fold change		Core matrisome - collagens	gene name	Day 7 fold change	Day 7 fold change
Col12a1	collagen, type XII, alpha 1	14.9776		Col4a6	collagen, type IV, alpha 6	2.98	-8.48391
Col24a1	collagen, type XXIV, alpha 1	14.0743		Col5a2	collagen, type V, alpha 2	3.92	5.30423
Col27a1	collagen, type XXVII, alpha 1	7.60558		Col3a1	collagen, type III, alpha 1	4.27	1.90958
Col5a3	collagen, type V, alpha 3	6.70184		Col17a1	collagen, type XVII, alpha 1	4.38	-2.27269
Col5a2	collagen, type V, alpha 2	5.30423		Col5a1	collagen, type V, alpha 1	4.73	4.91626
Col6a1	collagen, type VI, alpha 1	5.20392		Col24a1	collagen, type XXIV, alpha 1	4.85	14.0743
Col5a1	collagen, type V, alpha 1	4.91626		Col12a1	collagen, type XII, alpha 1	5.84	14.9776
Col6a2	collagen, type VI, alpha 2	4.42604		Col4a5	collagen, type IV, alpha 5	8.68	-1.59211
Col7a1	collagen, type VII, alpha 1	4.09108		Col28a1	collagen, type XXVIII, alpha 1	32.45	-6.3835
Col6a3	collagen, type VI, alpha 3	3.94764		Col7a1	collagen, type VII, alpha 1	36.69	4.09108
Col19a1	collagen, type XIX, alpha 1	2.65193		Col11a1	collagen, type XI, alpha 1	83.85	1.99485
Col8a1	collagen, type VIII, alpha 1	2.58387
Col18a1	collagen, type XVIII, alpha 1	2.54543
Col6a6	collagen, type VI, alpha 6	2.29801
Col8a2	collagen, type VIII, alpha 2	2.01065
Col11a1	collagen, type XI, alpha 1	1.99485
Col3a1	collagen, type III, alpha 1	1.90958
Col4a2	collagen, type IV, alpha 2	1.76898
Col4a1	collagen, type IV, alpha 1	1.6243
Col4a5	collagen, type IV, alpha 5	-1.59211
Col15a1	collagen, type XV, alpha 1	-1.75769
Col23a1	collagen, type XXIII, alpha 1	-2.08014
Col17a1	collagen, type XVII, alpha 1	-2.27269
Col20a1	collagen, type XX, alpha 1	-5.26601
Col28a1	collagen, type XXVIII, alpha 1	-6.3835
Col4a6	collagen, type IV, alpha 6	-8.48391
Col4a4	collagen, type IV, alpha 4	-11.7303
Col6a5	collagen, type VI, alpha 5	-13.9782
Col11a2	collagen, type XI, alpha 2	-14.5951
Col4a3	collagen, type IV, alpha 3	-15.7111
						Axolotl	Acomys
Core matrisome - ECM glycoproteins	genes	Day 7 fold change		Core matrisome - ECM glycoproteins	Gene Name	Day 7 fold change	Day 7 fold change
Tnn	tenascin N	256.018		Abi3bp	ABI gene family, member 3 (NESH) binding protein	-40.36	#N/A
Tnc	tenascin C	177.879		Zpld1	zona pellucida like domain containing 1	-9.03	#N/A
Cthrc1	collagen triple helix repeat containing 1	67.1379		Dmbt1	deleted in malignant brain tumors 1	-5.69	#N/A
Lama1	laminin, alpha 1	41.3316		Mmrn1	multimerin 1	-5.65	-8.78501
Col26a1	collagen, type XXVI, alpha 1	36.8954		Fbn1	fibrillin 1	-5.53	6.601
Fbn2	fibrillin 2	28.2026		Adipoq	adiponectin, C1Q and collagen domain containing	-5.05	-113.647
Fn1	fibronectin 1	23.9623		Pcolce	procollagen C-endopeptidase enhancer protein	-4.46	3.81246
Spp1	secreted phosphoprotein 1	20.4999		Spon2	spondin 2, extracellular matrix protein	-3.91	-1.83715
Thbs4	thrombospondin 4	16.0695		Tnxb	tenascin XB	-3.2	#N/A
Pxdn	peroxidasin	15.2411		Reln	reelin	-2.51	-3.11151
Nov	nephroblastoma overexpressed gene	13.6224		Tecta	tectorin alpha	-2.17	#N/A
Emilin1	elastin microfibril interfacer 1	13.0691		Igfals	insulin-like growth factor binding protein, acid labile subunit	-2.14	#N/A
Wisp1	WNT1 inducible signaling pathway protein 1	10.7791		Pcolce2	procollagen C-endopeptidase enhancer 2	2.06	#N/A
Lamc2	laminin, gamma 2	9.29017		Wisp1	WNT1 inducible signaling pathway protein 1	2.38	10.7791
Srpx2	sushi-repeat-containing protein, X-linked 2	7.61526		Thbs4	thrombospondin 4	2.51	16.0695
Fbln2	fibulin 2	7.27943		Srpx2	sushi-repeat-containing protein, X-linked 2	2.86	7.61526
Fbn1	fibrillin 1	6.601		Matn2	matrilin 2	2.91	-2.28127
Efemp2	epidermal growth factor-containing fibulin-like extracellular matrix protein 2	5.97015		Emilin2	elastin microfibril interfacer 2	3.39	3.12242
Mfap5	microfibrillar associated protein 5	5.20243		Ecm2	extracellular matrix protein 2, female organ and adipocyte specific	3.41	#N/A
Thbs1	thrombospondin 1	4.73463		Igfbp5	insulin-like growth factor binding protein 5	3.52	2.64584
Tnfaip6	tumor necrosis factor alpha induced protein 6	4.55911		Slit2	slit homolog 2 (Drosophila)	3.53	#N/A
Thbs3	thrombospondin 3	4.25326		Srpx	sushi-repeat-containing protein	4.22	#N/A
Mfap2	microfibrillar-associated protein 2	4.1652		Ctgf	connective tissue growth factor	4.55	1.57214
AW551984	expressed sequence AW551984	4.11591		Sparc	secreted acidic cysteine rich glycoprotein	4.89	1.93288
Pcolce	procollagen C-endopeptidase enhancer protein	3.81246		Postn	periostin, osteoblast specific factor	5.1	3.5656
Cyr61	cysteine rich protein 61	3.77841		Ltbp1	latent transforming growth factor beta binding protein 1	5.13	2.35557
Tsku	tsukushi, small leucine rich proteoglycan	3.77592		Fbn2	fibrillin 2	5.27	28.2026
Spon1	spondin 1, (f-spondin) extracellular matrix protein	3.61295		Mfap2	microfibrillar-associated protein 2	5.46	4.1652
Postn	periostin, osteoblast specific factor	3.5656		Lamb1	laminin B1 subunit 1	5.66	3.5389
Lamb1	laminin B1	3.5389		Thbs3	thrombospondin 3	5.94	4.25326
Edil3	EGF-like repeats and discoidin I-like domains 3	3.42064		Vwde	von Willebrand factor D and EGF domains	6.07	#N/A
Slamf6	SLAM family member 6	3.40021		Tgfbi	transforming growth factor, beta induced	6.33	3.03302
Lama4	laminin, alpha 4	3.24819		Igfbp2	insulin-like growth factor binding protein 2	7.25	-7.15905
Dpt	dermatopontin	3.21676		Ecm1	extracellular matrix protein 1	7.54	2.4542
Emilin2	elastin microfibril interfacer 2	3.12242		Ltbp3	latent transforming growth factor beta binding protein 3	7.71	-1.92124
Kcp	kielin/chordin-like protein	3.12167		Cthrc1	collagen triple helix repeat containing 1	8.15	67.1379
Lgi2	leucine-rich repeat LGI family, member 2	3.1136		Pxdn	peroxidasin homolog (Drosophila)	8.67	15.2411
Matn4	matrilin 4	3.06484		Efemp1	epidermal growth factor-containing fibulin-like extracellular matrix protein 1	14.1	2.06527
Tgfbi	transforming growth factor, beta induced	3.03302		Vit	vitrin	15.32	-2.07155
Igfbp4	insulin-like growth factor binding protein 4	3.02465		Thbs1	thrombospondin 1	15.78	4.73463
Crispld2	cysteine-rich secretory protein LCCL domain containing 2	2.85729		Lama1	laminin, alpha 1	21.21	41.3316
Nid1	nidogen 1	2.79763		Thbs2	thrombospondin 2	27.53	2.66197
Igfbp6	insulin-like growth factor binding protein 6	2.71606		Fn1	fibronectin 1	39.7	23.9623
Thbs2	thrombospondin 2	2.66197		Tnc	tenascin C	58.6	177.879
Igfbp5	insulin-like growth factor binding protein 5	2.64584
Ecm1	extracellular matrix protein 1	2.4542
Vwa1	von Willebrand factor A domain containing 1	2.43817
Nid2	nidogen 2	2.42498
Ltbp1	latent transforming growth factor beta binding protein 1	2.35557
Fbln5	fibulin 5	2.19232
Aebp1	AE binding protein 1	2.13382
Efemp1	epidermal growth factor-containing fibulin-like extracellular matrix protein 1	2.06527
Sspo	SCO-spondin	1.97626
Lamc1	laminin, gamma 1	1.95527
Lama3	laminin, alpha 3	1.93669
Sparc	secreted acidic cysteine rich glycoprotein	1.93288
Creld2	cysteine-rich with EGF-like domains 2	1.82546
Wisp3	WNT1 inducible signaling pathway protein 3	1.79897
Ltbp2	latent transforming growth factor beta binding protein 2	1.68876
Mfap3	microfibrillar-associated protein 3	1.59251
Ctgf	connective tissue growth factor	1.57214
Igfbp3	insulin-like growth factor binding protein 3	1.54497
Thsd4	thrombospondin, type I, domain containing 4	1.47502
Creld1	cysteine-rich with EGF-like domains 1	1.45684
Lamb3	laminin, beta 3	1.44107
Mfge8	milk fat globule-EGF factor 8 protein	1.41486
Vwa9	von Willebrand factor A domain containing 9	1.35553
Vwa2	von Willebrand factor A domain containing 2	-1.31966
Sparcl1	SPARC-like 1	-1.42075
Tinagl1	tubulointerstitial nephritis antigen-like 1	-1.50098
Agrn	agrin	-1.518
Mgp	matrix Gla protein	-1.5389
Mmrn2	multimerin 2	-1.53995
Vwa7	von Willebrand factor A domain containing 7	-1.60276
Ntn4	netrin 4	-1.72868
Crim1	cysteine rich transmembrane BMP regulator 1 (chordin like)	-1.75543
Ddx26b	DEAD/H (Asp-Glu-Ala-Asp/His) box polypeptide 26B	-1.77917
Spon2	spondin 2, extracellular matrix protein	-1.83715
Ltbp3	latent transforming growth factor beta binding protein 3	-1.92124
Ntn1	netrin 1	-1.99434
Lama5	laminin, alpha 5	-2.04391
Vit	vitrin	-2.07155
Matn2	matrilin 2	-2.28127
Lgi4	leucine-rich repeat LGI family, member 4	-2.38481
Ibsp	integrin binding sialoprotein	-2.52264
Npnt	nephronectin	-2.69706
Bmper	BMP-binding endothelial regulator	-2.75945
Fras1	Fraser extracellular matrix complex subunit 1	-3.04691
Reln	reelin	-3.11151
Smoc2	SPARC related modular calcium binding 2	-3.75886
Sbspon	somatomedin B and thrombospondin, type 1 domain containing	-4.82614
Lgi1	leucine-rich repeat LGI family, member 1	-5.02029
Cilp	cartilage intermediate layer protein, nucleotide pyrophosphohydrolase	-5.68797
Ndnf	neuron-derived neurotrophic factor	-6.04394
Rspo1	R-spondin 1	-6.23207
Nell2	NEL-like 2	-6.44999
Smoc1	SPARC related modular calcium binding 1	-6.82156
Igfbp2	insulin-like growth factor binding protein 2	-7.15905
Mmrn1	multimerin 1	-8.78501
Ltbp4	latent transforming growth factor beta binding protein 4	-9.56811
Ntng2	netrin G2	-9.6431
Lamc3	laminin gamma 3	-14.4722
Coch	cochlin	-18.9756
Lrg1	leucine-rich alpha-2-glycoprotein 1	-29.6162
Rspo4	R-spondin 4	-32.2747
Gldn	gliomedin	-38.1926
Adipoq	adiponectin, C1Q and collagen domain containing	-113.647
						Axolotl	Acomys
Core matrisome - Proteoglycans	genes	Day 7 fold change		Core matrisome - Proteoglycans	Gene Name	Day 7 fold change	Day 7 fold change
Prg4	proteoglycan 4 (megakaryocyte stimulating factor, articular superficial zone protein)	136.186		Ogn	osteoglycin	-5.96	-3.52376
Srgn	serglycin	16.7988		Dcn	decorin	2.09	1.88465
Hapln3	hyaluronan and proteoglycan link protein 3	14.3407		Epyc	epiphycan	2.2	#N/A
Vcan	versican	13.2199		Bcan	brevican	2.48	#N/A
Acan	aggrecan	11.9475		Srgn	serglycin	2.8	16.7988
Bgn	biglycan	11.5771		Prg3	proteoglycan 3	3.16	#N/A
Spock3	sparc/osteonectin, cwcv and kazal-like domains proteoglycan 3	9.4885		Kera	keratocan	3.26	#N/A
Hspg2	perlecan (heparan sulfate proteoglycan 2)	2.99622		Prg4	proteoglycan 4 (megakaryocyte stimulating factor, articular superficial zone protein)	4.14	136.186
Fmod	fibromodulin	2.98253		Esm1	endothelial cell-specific molecule 1	4.3	#N/A
Lum	lumican	2.10892
Dcn	decorin	1.88465
Aspn	asporin	1.51656
Podn	podocan	-1.53759
Chadl	chondroadherin-like	-2.08724
Ogn	osteoglycin	-3.52376
Spock2	sparc/osteonectin, cwcv and kazal-like domains proteoglycan 2	-4.14433
Hapln1	hyaluronan and proteoglycan link protein 1	-67.857
						Axolotl	Acomys
Matrisome associated - ECM affiliated	genes	Day 7 fold change		Matrisome associated - ECM affiliated	Gene Name	Day 7 fold change	Day 7 fold change
Clec4d	C-type lectin domain family 4, member d	425.424		Lgals8	lectin, galactose binding, soluble 8	-646.36	1.90995
Clec5a	C-type lectin domain family 5, member a	27.5308		Lgals3	lectin, galactose binding, soluble 3	-538.23	1.91285
C1qtnf3	C1q and tumor necrosis factor related protein 3	26.3147		Clec3b	C-type lectin domain family 3, member b	-9.29	5.10031
Fcna	ficolin A	23.5301		Lgals1	lectin, galactose binding, soluble 1	-4.59	#N/A
Clec4n	C-type lectin domain family 4, member n	17.1624		Muc2	mucin 2	-4.11	#N/A
Clec10a	C-type lectin domain family 10, member A	15.36		Elfn1	leucine rich repeat and fibronectin type III, extracellular 1	-3.23	#N/A
C1qb	complement component 1, q subcomponent, beta polypeptide	14.0285		C1qtnf2	C1q and tumor necrosis factor related protein 2	-3.12	-3.10156
Clec4e	C-type lectin domain family 4, member e	12.3747		Cspg5	chondroitin sulfate proteoglycan 5	-2.08	#N/A
Fcnb	ficolin B	11.7998		Muc4	mucin 4	-2.05	#N/A
C1qa	complement component 1, q subcomponent, alpha polypeptide	11.6061		Sdc1	syndecan 1	2.08	1.29508
C1qc	complement component 1, q subcomponent, C chain	11.0076		C1qc	complement component 1, q subcomponent, C chain	2.22	11.0076
Clec4a4	C-type lectin domain family 4, member a4	9.91514		Gpc4	glypican 4	2.3	#N/A
Cd209a	CD209a antigen	8.95418		C1qtnf5	C1q and tumor necrosis factor related protein 5	2.43	2.01121
Plxnc1	plexin C1	6.36447		Anxa2	annexin A2	2.44	1.7079
Clec7a	C-type lectin domain family 7, member a	5.52714		Anxa1	annexin A1	2.55	3.0352
Clec4b2	C-type lectin domain family 4, member b2	5.3275		Plxnb2	plexin B2	2.82	#N/A
Clec3b	C-type lectin domain family 3, member b	5.10031		Plxnd1	plexin D1	2.86	1.89348
Gpc3	glypican 3	4.94415		C1qb	complement component 1, q subcomponent, beta polypeptide	2.87	14.0285
Clec4a1	C-type lectin domain family 4, member a1	4.33117		Sftpd	surfactant associated protein D	3.87	#N/A
C1qtnf6	C1q and tumor necrosis factor related protein 6	4.24872		Sema6a	sema domain, transmembrane domain (TM), and cytoplasmic domain, (semaphorin) 6A	5.51	-1.49089
C1qtnf1	C1q and tumor necrosis factor related protein 1	4.19706		Sdc2	syndecan 2	6.44	1.37823
Clec4a2	C-type lectin domain family 4, member a2	4.15625		Lgals9	lectin, galactose binding, soluble 9	7.37	3.17944
Gpc6	glypican 6	3.95863		C1qtnf1	C1q and tumor necrosis factor related protein 1	9.01	4.19706
Cd209d	CD209d antigen	3.72014
Sema6b	sema domain, transmembrane domain (TM), and cytoplasmic domain, (semaphorin) 6B	3.64953
Lgals9	lectin, galactose binding, soluble 9	3.17944
Anxa1	annexin A1	3.0352
Colec12	collectin sub-family member 12	2.96676
Anxa3	annexin A3	2.87832
Sema4g	sema domain, immunoglobulin domain (Ig), transmembrane domain (TM) and short cytoplasmic domain, (semaphorin) 4G	2.75402
Clec4a3	C-type lectin domain family 4, member a3	2.24919
Emcn	endomucin	2.24342
Clec2e	C-type lectin domain family 2, member e	2.19155
Sema4f	sema domain, immunoglobulin domain (Ig), TM domain, and short cytoplasmic domain	2.03505
C1qtnf5	C1q and tumor necrosis factor related protein 5	2.01121
Lman1	lectin, mannose-binding, 1	2.01112
Lgals3	lectin, galactose binding, soluble 3	1.91285
Lgals8	lectin, galactose binding, soluble 8	1.90995
Plxnd1	plexin D1	1.89348
Anxa6	annexin A6	1.83822
Anxa4	annexin A4	1.79953
Anxa2	annexin A2	1.7079
Sema6c	sema domain, transmembrane domain (TM), and cytoplasmic domain, (semaphorin) 6C	1.70782
Sema7a	sema domain, immunoglobulin domain (Ig), and GPI membrane anchor, (semaphorin) 7A	1.69003
Sema3c	sema domain, immunoglobulin domain (Ig), short basic domain, secreted, (semaphorin) 3C	1.68936
Sema5b	sema domain, seven thrombospondin repeats (type 1 and type 1-like), transmembrane domain (TM) and short cytoplasmic domain, (semaphorin) 5B	1.64381
Plxna1	plexin A1	1.56951
Anxa5	annexin A5	1.55067
Plxna3	plexin A3	1.52742
Sdc3	syndecan 3	1.44117
Sdc2	syndecan 2	1.37823
Sema4c	sema domain, immunoglobulin domain (Ig), transmembrane domain (TM) and short cytoplasmic domain, (semaphorin) 4C	1.3163
Sdc1	syndecan 1	1.29508
Anxa11	annexin A11	1.25675
Sema4d	sema domain, immunoglobulin domain (Ig), transmembrane domain (TM) and short cytoplasmic domain, (semaphorin) 4D	-1.35173
Plxdc2	plexin domain containing 2	-1.46133
Sema6a	sema domain, transmembrane domain (TM), and cytoplasmic domain, (semaphorin) 6A	-1.49089
Clec2d	C-type lectin domain family 2, member d	-1.52664
Plxna2	plexin A2	-1.59859
Colec10	collectin sub-family member 10	-1.62539
Sema4b	sema domain, immunoglobulin domain (Ig), transmembrane domain (TM) and short cytoplasmic domain, (semaphorin) 4B	-1.64009
Sema3b	sema domain, immunoglobulin domain (Ig), short basic domain, secreted, (semaphorin) 3B	-1.72508
Clec2g	C-type lectin domain family 2, member g	-1.80209
Sema3f	sema domain, immunoglobulin domain (Ig), short basic domain, secreted, (semaphorin) 3F	-1.89055
Cspg4	chondroitin sulfate proteoglycan 4	-1.93196
C1qtnf7	C1q and tumor necrosis factor related protein 7	-1.93918
Clec2h	C-type lectin domain family 2, member h	-2.02908
Clec2i	C-type lectin domain family 2, member i	-2.18826
Lgalsl	lectin, galactoside binding-like	-2.21066
Anxa9	annexin A9	-2.59362
C1qtnf9	C1q and tumor necrosis factor related protein 9	-2.75612
Sema3a	sema domain, immunoglobulin domain (Ig), short basic domain, secreted, (semaphorin) 3A	-2.78948
Anxa8	annexin A8	-2.83875
C1qtnf2	C1q and tumor necrosis factor related protein 2	-3.10156
Sema3d	sema domain, immunoglobulin domain (Ig), short basic domain, secreted, (semaphorin) 3D	-3.22701
Clec11a	C-type lectin domain family 11, member a	-3.31839
Plxdc1	plexin domain containing 1	-3.3898
Plxnb1	plexin B1	-3.73792
Sema5a	sema domain, seven thrombospondin repeats (type 1 and type 1-like), transmembrane domain (TM) and short cytoplasmic domain, (semaphorin) 5A	-3.80983
Sema3e	sema domain, immunoglobulin domain (Ig), short basic domain, secreted, (semaphorin) 3E	-4.71009
Parm1	prostate androgen-regulated mucin-like protein 1	-5.32419
Frem1	Fras1 related extracellular matrix protein 1	-6.67648
Muc15	mucin 15	-7.08076
Grem1	gremlin 1, DAN family BMP antagonist	-9.11199
Frem2	Fras1 related extracellular matrix protein 2	-19.6097
Lgals12	lectin, galactose binding, soluble 12	-76.4283
						Axolotl	Acomys
Matrisome associated - secreted factors	genes	Day 7 fold change		Matrisome associated - secreted factors	Gene Name	Day 7 fold change	Day 7 fold change
Il24	interleukin 24	296.117		Chrdl1	chordin-like 1	-4.66	-2.95863
Ccl3	chemokine (C-C motif) ligand 3	235.611		Il1b	interleukin 1 beta	-2.26	147.457
Cxcl2	chemokine (C-X-C motif) ligand 2	221.872		Fgf12	fibroblast growth factor 12	-2.03	-6.65225
S100a8	S100 calcium binding protein A8 (calgranulin A)	195.254		S100a10	S100 calcium binding protein A10 (calpactin)	2.21	2.24859
Csf3	colony stimulating factor 3 (granulocyte)	171.645		Ntf3	neurotrophin 3	2.36	-2.53933
Il1f6	interleukin 1 family, member 6	169.566		Tnfsf10	tumor necrosis factor (ligand) superfamily, member 10	2.56	-2.31539
Il1b	interleukin 1 beta	147.457		Vwc2l	von Willebrand factor C domain-containing protein 2-like	2.79	#N/A
Ccl4	chemokine (C-C motif) ligand 4	110.907		Fstl1	follistatin-like 1	3.54	9.20339
S100a9	S100 calcium binding protein A9 (calgranulin B)	62.2388		Sfrp2	secreted frizzled-related protein 2	5.39	12.9269
Cxcl1	chemokine (C-X-C motif) ligand 1	52.301		Angptl2	angiopoietin-like 2	5.43	1.51
Wnt2	wingless-type MMTV integration site family, member 2	32.9904		Figf	c-fos induced growth factor	6.52	-2.42368
Tnfsf13b	tumor necrosis factor (ligand) superfamily, member 13b	31.7689		Sfrp4	secreted frizzled-related protein 4	9.19	6.25665
Tnfsf9	tumor necrosis factor (ligand) superfamily, member 9	28.9834
Cxcl5	chemokine (C-X-C motif) ligand 5	26.712
Osm	oncostatin M	24.7741
Il1f9	interleukin 1 family, member 9	24.3649
Il10	interleukin 10	23.507
Rptn	repetin	20.5217
Il6	interleukin 6	19.7757
Ptn	pleiotrophin	19.061
Mdk	midkine	17.6197
Epgn	epithelial mitogen	17.1932
Nrg1	neuregulin 1	15.6588
Wnt2b	wingless-type MMTV integration site family, member 2B	14.9629
Fgf23	fibroblast growth factor 23	12.9915
Sfrp2	secreted frizzled-related protein 2	12.9269
Lif	leukemia inhibitory factor	12.0778
Hbegf	heparin-binding EGF-like growth factor	9.33231
Fstl1	follistatin-like 1	9.20339
Clcf1	cardiotrophin-like cytokine factor 1	8.95799
Il1rn	interleukin 1 receptor antagonist	7.55044
Ccl8	chemokine (C-C motif) ligand 8	7.15421
Pgf	placental growth factor	6.83264
Ppbp	pro-platelet basic protein	6.6502
Ccl7	chemokine (C-C motif) ligand 7	6.46629
Tnfsf11	tumor necrosis factor (ligand) superfamily, member 11	6.38379
Angptl4	angiopoietin-like 4	6.3771
Sfrp4	secreted frizzled-related protein 4	6.25665
Areg	amphiregulin	6.2345
Inhba	inhibin beta-A	5.61432
Ccl2	chemokine (C-C motif) ligand 2	5.23151
Il1a	interleukin 1 alpha	5.16856
Ccl6	chemokine (C-C motif) ligand 6	4.8875
Scube2	signal peptide, CUB domain, EGF-like 2	4.88488
S100a4	S100 calcium binding protein A4	4.30567
Angpt4	angiopoietin 4	4.28503
Fgf16	fibroblast growth factor 16	4.26054
Vegfa	vascular endothelial growth factor A	4.24163
Wnt7a	wingless-type MMTV integration site family, member 7A	4.06079
Vegfc	vascular endothelial growth factor C	3.30192
Fgf11	fibroblast growth factor 11	3.28487
Tnfsf8	tumor necrosis factor (ligand) superfamily, member 8	3.05925
Ccl12	chemokine (C-C motif) ligand 12	3.04652
Igf2	insulin-like growth factor 2	3.02754
Lefty1	left right determination factor 1	3.01848
S100a11	S100 calcium binding protein A11	2.99031
Tgfb1	transforming growth factor, beta 1	2.98494
Crlf1	cytokine receptor-like factor 1	2.75507
S100a6	S100 calcium binding protein A6 (calcyclin)	2.66198
Tgfb3	transforming growth factor, beta 3	2.64545
Ccl28	chemokine (C-C motif) ligand 28	2.60435
Fam132b	family with sequence similarity 132, member B	2.48162
Ngf	nerve growth factor	2.47265
Fgf7	fibroblast growth factor 7	2.36242
Pdgfc	platelet-derived growth factor, C polypeptide	2.28146
Wnt6	wingless-type MMTV integration site family, member 6	2.26804
Hgf	hepatocyte growth factor	2.26793
S100a10	S100 calcium binding protein A10 (calpactin)	2.24859
Megf10	multiple EGF-like-domains 10	2.19851
Wnt9a	wingless-type MMTV integration site family, member 9A	1.99916
Angptl1	angiopoietin-like 1	1.97755
Tnf	tumor necrosis factor	1.96648
Wnt10b	wingless-type MMTV integration site family, member 10B	1.92107
Angpt2	angiopoietin 2	1.88805
Gdf11	growth differentiation factor 11	1.88313
Fgf2	fibroblast growth factor 2	1.81853
Il1f8	interleukin 1 family, member 8	1.71692
Ccbe1	collagen and calcium binding EGF domains 1	1.70959
Megf6	multiple EGF-like-domains 6	1.62374
Tnfsf13	tumor necrosis factor (ligand) superfamily, member 13	1.61218
Chrd	chordin	1.56028
Wnt5a	wingless-type MMTV integration site family, member 5A	1.55281
Pdgfd	platelet-derived growth factor, D polypeptide	1.52801
Angptl2	angiopoietin-like 2	1.51
Sfrp1	secreted frizzled-related protein 1	1.41387
Il16	interleukin 16	1.39872
Fst	follistatin	-1.32168
Egfl7	EGF-like domain 7	-1.35863
Csf1	colony stimulating factor 1 (macrophage)	-1.47051
Fgf9	fibroblast growth factor 9	-1.491
Vegfb	vascular endothelial growth factor B	-1.56154
Wnt16	wingless-type MMTV integration site family, member 16	-1.58211
Flt3l	FMS-like tyrosine kinase 3 ligand	-1.58266
S100a1	S100 calcium binding protein A1	-1.59523
Fam132a	family with sequence similarity 132, member A	-1.61592
Tnfsf15	tumor necrosis factor (ligand) superfamily, member 15	-1.6312
Bmp7	bone morphogenetic protein 7	-1.63141
Fgf18	fibroblast growth factor 18	-1.63587
Wnt11	wingless-type MMTV integration site family, member 11	-1.66426
Il1f5	interleukin 1 family, member 5 (delta)	-1.67769
Angpt1	angiopoietin 1	-1.7686
Wnt10a	wingless-type MMTV integration site family, member 10A	-1.83131
Il7	interleukin 7	-1.83828
Cxcl12	chemokine (C-X-C motif) ligand 12	-1.84193
Megf9	multiple EGF-like-domains 9	-1.85201
Il34	interleukin 34	-1.91597
Bmp6	bone morphogenetic protein 6	-1.95722
Tdgf1	teratocarcinoma-derived growth factor 1	-1.99928
Il17d	interleukin 17D	-2.08725
Bmp2	bone morphogenetic protein 2	-2.15192
Fgfbp1	fibroblast growth factor binding protein 1	-2.17841
Cxcl9	chemokine (C-X-C motif) ligand 9	-2.25341
Tnfsf10	tumor necrosis factor (ligand) superfamily, member 10	-2.31539
Fgf10	fibroblast growth factor 10	-2.33992
Fgfbp3	fibroblast growth factor binding protein 3	-2.34181
Figf	c-fos induced growth factor	-2.42368
Wnt3a	wingless-type MMTV integration site family, member 3A	-2.49508
Ntf3	neurotrophin 3	-2.53933
Wnt4	wingless-type MMTV integration site family, member 4	-2.58766
Btc	betacellulin, epidermal growth factor family member	-2.69376
Bmp4	bone morphogenetic protein 4	-2.70139
Hhip	Hedgehog-interacting protein	-2.71989
Wnt7b	wingless-type MMTV integration site family, member 7B	-2.89172
Chrdl1	chordin-like 1	-2.95863
Ntf5	neurotrophin 5	-3.25624
Bmp3	bone morphogenetic protein 3	-3.36945
Mst1	macrophage stimulating 1 (hepatocyte growth factor-like)	-3.59254
Ctf1	cardiotrophin 1	-3.76354
Shh	sonic hedgehog	-3.76623
Cx3cl1	chemokine (C-X3-C motif) ligand 1	-3.79588
Gdf1	growth differentiation factor 1	-3.83571
Il12b	interleukin 12b	-3.85834
Ism1	isthmin 1, angiogenesis inhibitor	-3.88498
Cxcl14	chemokine (C-X-C motif) ligand 14	-4.11822
Ccl22	chemokine (C-C motif) ligand 22	-4.63321
Nrtn	neurturin	-4.64723
Fgf1	fibroblast growth factor 1	-4.81564
Egfl8	EGF-like domain 8	-5.31687
Il1f10	interleukin 1 family, member 10	-5.99142
Fgf12	fibroblast growth factor 12	-6.65225
Nrg4	neuregulin 4	-8.0411
Egf	epidermal growth factor	-8.11444
Il18	interleukin 18	-8.38385
Ccl24	chemokine (C-C motif) ligand 24	-8.89331
Wnt3	wingless-type MMTV integration site family, member 3	-10.0426
S100b	S100 protein, beta polypeptide, neural	-10.3195
Ccl27a	chemokine (C-C motif) ligand 27A	-10.3758
Wif1	Wnt inhibitory factor 1	-12.2262
Sfrp5	secreted frizzled-related sequence protein 5	-13.1214
Scube1	signal peptide, CUB domain, EGF-like 1	-17.4843
Frzb	frizzled-related protein	-19.4297
Ccl21c	chemokine (C-C motif) ligand 21C (leucine)	-19.5696
Flg2	filaggrin family member 2	-27.0284
Tchh	trichohyalin	-39.0488
Crnn	cornulin	-53.1267
Ccl19	chemokine (C-C motif) ligand 19	-85.42
Lep	leptin	-106.109
Mstn	myostatin	-122.124
						Axolotl	Acomys
Matrisome associated - regulators	genes	Day 7 fold change		Matrisome associated - regulators	Gene Name	Day 7 fold change	Day 7 fold change
Mmp13	matrix metallopeptidase 13	539.131		Ctss	cathepsin S	-3.3	9.75657
Mmp9	matrix metallopeptidase 9	164.809		F10	coagulation factor X	-2.34	#N/A
Adamts16	a disintegrin-like and metallopeptidase (reprolysin type) with thrombospondin type 1 motif, 16	93.0489		Ctsg	cathepsin G	-2.07	#N/A
Adamts4	a disintegrin-like and metallopeptidase (reprolysin type) with thrombospondin type 1 motif, 4	55.7963		Cstb	cystatin B	2.01	#N/A
Stfa2	stefin A2	49.2597		Htra3	HtrA serine peptidase 3	2.11	3.81207
Serpine1	serine (or cysteine) peptidase inhibitor, clade E, member 1	40.8948		Adamts12	a disintegrin-like and metallopeptidase (reprolysin type) with thrombospondin type 1 motif, 12	2.12	1.84941
Mmp3	matrix metallopeptidase 3	40.7884		Ctsb	cathepsin B	2.13	4.04203
Slpi	secretory leukocyte peptidase inhibitor	39.6268		Cd109	CD109 antigen	2.13	1.38231
Serpina9	serine (or cysteine) peptidase inhibitor, clade A (alpha-1 antiproteinase, antitrypsin), member 9	26.4364		P4ha2	procollagen-proline, 2-oxoglutarate 4-dioxygenase (proline 4-hydroxylase), alpha II polypeptide	2.14	3.83696
P4ha3	procollagen-proline, 2-oxoglutarate 4-dioxygenase (proline 4-hydroxylase), alpha polypeptide III	23.8114		Plod1	procollagen-lysine, 2-oxoglutarate 5-dioxygenase 1	2.23	3.91314
Plod2	procollagen lysine, 2-oxoglutarate 5-dioxygenase 2	22.6439		Mmp28	matrix metallopeptidase 28 (epilysin)	2.51	-1.5607
Plat	plasminogen activator, tissue	20.6226		Serpine2	serine (or cysteine) peptidase inhibitor, clade E, member 2	3.08	#N/A
Adamts17	a disintegrin-like and metallopeptidase (reprolysin type) with thrombospondin type 1 motif, 17	19.747		Bmp1	bone morphogenetic protein 1	3.17	3.59788
Lox	lysyl oxidase	13.9932		Astl	astacin-like metalloendopeptidase (M12 family)	3.37	#N/A
Pcsk5	proprotein convertase subtilisin/kexin type 5	12.7891		Timp1	tissue inhibitor of metalloproteinase 1	3.37	11.2925
Adamdec1	ADAM-like, decysin 1	11.4449		Tll1	tolloid-like	3.76	-1.48635
Timp1	tissue inhibitor of metalloproteinase 1	11.2925		Serpinh1	serine (or cysteine) peptidase inhibitor, clade H, member 1	3.82	4.30281
Adam12	a disintegrin and metallopeptidase domain 12 (meltrin alpha)	11.0252		Serpinb10	serine (or cysteine) peptidase inhibitor, clade B (ovalbumin), member 10	4.34	1.81344
Sulf1	sulfatase 1	9.98148		Mmp14	matrix metallopeptidase 14 (membrane-inserted)	4.4	3.57853
Ctss	cathepsin S	9.75657		F13a1	coagulation factor XIII, A1 subunit	4.66	#N/A
Pamr1	peptidase domain containing associated with muscle regeneration 1	9.50841		Lepre1	leprecan 1	5.04	#N/A
Ctsk	cathepsin K	9.05393		Plod2	procollagen lysine, 2-oxoglutarate 5-dioxygenase 2	5.75	22.6439
Adamts14	a disintegrin-like and metallopeptidase (reprolysin type) with thrombospondin type 1 motif, 14	8.66802		Ctsk	cathepsin K	6.07	9.05393
Adamts19	a disintegrin-like and metallopeptidase (reprolysin type) with thrombospondin type 1 motif, 19	8.18533		Mmp2	matrix metallopeptidase 2	6.54	3.69158
Loxl3	lysyl oxidase-like 3	7.62835		Pcsk5	proprotein convertase subtilisin/kexin type 5	7.24	12.7891
Mmp12	matrix metallopeptidase 12	7.58503		Htra1	HtrA serine peptidase 1	9.44	2.38291
Adamts3	a disintegrin-like and metallopeptidase (reprolysin type) with thrombospondin type 1 motif, 3	7.41872		Mmp13	matrix metallopeptidase 13	9.55	539.131
Adamts7	a disintegrin-like and metallopeptidase (reprolysin type) with thrombospondin type 1 motif, 7	7.15982		Itih5	inter-alpha (globulin) inhibitor H5	13.29	#N/A
Serpinc1	serine (or cysteine) peptidase inhibitor, clade C (antithrombin), member 1	6.9021		Mmp3	matrix metallopeptidase 3	13.34	40.7884
Adam19	a disintegrin and metallopeptidase domain 19 (meltrin beta)	6.44473		Sulf1	sulfatase 1	15.21	9.98148
Mmp25	matrix metallopeptidase 25	5.63383		Loxl2	lysyl oxidase-like 2	15.77	2.68671
Loxl1	lysyl oxidase-like 1	5.43196		F13b	coagulation factor XIII, beta subunit	45.86	#N/A
Mmp11	matrix metallopeptidase 11	5.4206		Pamr1	peptidase domain containing associated with muscle regeneration 1	67.96	9.50841
Adamts6	a disintegrin-like and metallopeptidase (reprolysin type) with thrombospondin type 1 motif, 6	5.41379		Kazald1	Kazal-type serine peptidase inhibitor domain 1	241.9	-7.84175
Mmp10	matrix metallopeptidase 10	5.35307
Ctsz	cathepsin Z	5.33988
Mmp19	matrix metallopeptidase 19	5.27209
P4ha1	procollagen-proline, 2-oxoglutarate 4-dioxygenase (proline 4-hydroxylase), alpha 1 polypeptide	5.07709
Mmp23	matrix metallopeptidase 23	4.98229
Adam23	a disintegrin and metallopeptidase domain 23	4.79881
Ctsc	cathepsin C	4.69013
Adam8	a disintegrin and metallopeptidase domain 8	4.57801
Serpinh1	serine (or cysteine) peptidase inhibitor, clade H, member 1	4.30281
Serpinb1a	serine (or cysteine) peptidase inhibitor, clade B, member 1a	4.11477
Ctsb	cathepsin B	4.04203
Plod1	procollagen-lysine, 2-oxoglutarate 5-dioxygenase 1	3.91314
P4ha2	procollagen-proline, 2-oxoglutarate 4-dioxygenase (proline 4-hydroxylase), alpha II polypeptide	3.83696
Htra3	HtrA serine peptidase 3	3.81207
Mmp2	matrix metallopeptidase 2	3.69158
Htra4	HtrA serine peptidase 4	3.63534
Bmp1	bone morphogenetic protein 1	3.59788
Mmp14	matrix metallopeptidase 14 (membrane-inserted)	3.57853
Fam20a	family with sequence similarity 20, member A	3.38843
Plod3	procollagen-lysine, 2-oxoglutarate 5-dioxygenase 3	3.35494
Sulf2	sulfatase 2	3.2977
Ctse	cathepsin E	3.14268
Adamts15	a disintegrin-like and metallopeptidase (reprolysin type) with thrombospondin type 1 motif, 15	2.97217
Ctsh	cathepsin H	2.92171
Serping1	serine (or cysteine) peptidase inhibitor, clade G, member 1	2.77252
Fam20c	family with sequence similarity 20, member C	2.7682
Loxl2	lysyl oxidase-like 2	2.68671
Tgm1	transglutaminase 1, K polypeptide	2.54439
Serpinb3a	serine (or cysteine) peptidase inhibitor, clade B (ovalbumin), member 3A	2.49517
Plau	plasminogen activator, urokinase	2.43457
Htra1	HtrA serine peptidase 1	2.38291
Timp2	tissue inhibitor of metalloproteinase 2	2.27988
Serpina3m	serine (or cysteine) peptidase inhibitor, clade A, member 3M	2.25477
Adamts9	a disintegrin-like and metallopeptidase (reprolysin type) with thrombospondin type 1 motif, 9	2.18165
Serpinf1	serine (or cysteine) peptidase inhibitor, clade F, member 1	2.13929
Serpina3b	serine (or cysteine) peptidase inhibitor, clade A, member 3B	2.12696
Adamtsl1	ADAMTS-like 1	2.11349
Ctso	cathepsin O	2.09756
Adam9	a disintegrin and metallopeptidase domain 9 (meltrin gamma)	2.09107
A2m	alpha-2-macroglobulin	2.02104
Ctsl	cathepsin L	1.87229
Adamts2	a disintegrin-like and metallopeptidase (reprolysin type) with thrombospondin type 1 motif, 2	1.84972
Adamts12	a disintegrin-like and metallopeptidase (reprolysin type) with thrombospondin type 1 motif, 12	1.84941
Serpinb10	serine (or cysteine) peptidase inhibitor, clade B (ovalbumin), member 10	1.81344
Hyal2	hyaluronoglucosaminidase 2	1.75293
Adam10	a disintegrin and metallopeptidase domain 10	1.74274
Serpinb9	serine (or cysteine) peptidase inhibitor, clade B, member 9	1.72738
Ctsd	cathepsin D	1.69906
Serpina3a	serine (or cysteine) peptidase inhibitor, clade A, member 3A	1.69396
Hyal1	hyaluronoglucosaminidase 1	1.51981
Ctsa	cathepsin A	1.50407
Pappa	pregnancy-associated plasma protein A	1.47671
Adamts1	a disintegrin-like and metallopeptidase (reprolysin type) with thrombospondin type 1 motif, 1	1.45341
Serpina3f	serine (or cysteine) peptidase inhibitor, clade A, member 3F	1.4325
Adam15	a disintegrin and metallopeptidase domain 15 (metargidin)	1.43041
Cd109	CD109 antigen	1.38231
Hpse	heparanase	1.37781
Loxl4	lysyl oxidase-like 4	1.34719
Egln2	egl-9 family hypoxia-inducible factor 2	1.34459
Adam17	a disintegrin and metallopeptidase domain 17	1.32394
Egln1	egl-9 family hypoxia-inducible factor 1	1.23654
Ngly1	N-glycanase 1	-1.31432
Fam20b	family with sequence similarity 20, member B	-1.45366
Pcsk6	proprotein convertase subtilisin/kexin type 6	-1.47872
Tll1	tolloid-like	-1.48635
Serpine3	serpin peptidase inhibitor, clade E (nexin, plasminogen activator inhibitor type 1), member 3	-1.53552
Ogfod1	2-oxoglutarate and iron-dependent oxygenase domain containing 1	-1.53653
Mmp28	matrix metallopeptidase 28 (epilysin)	-1.5607
Adam33	a disintegrin and metallopeptidase domain 33	-1.57655
Serpinb5	serine (or cysteine) peptidase inhibitor, clade B, member 5	-1.60314
Serpinb8	serine (or cysteine) peptidase inhibitor, clade B, member 8	-1.71553
Itih4	inter alpha-trypsin inhibitor, heavy chain 4	-1.91069
Adamts18	a disintegrin-like and metallopeptidase (reprolysin type) with thrombospondin type 1 motif, 18	-1.97336
Mmp17	matrix metallopeptidase 17	-1.99687
Pappa2	pappalysin 2	-2.07135
Mmp15	matrix metallopeptidase 15	-2.10524
Adamtsl2	ADAMTS-like 2	-2.30244
Adam22	a disintegrin and metallopeptidase domain 22	-2.44306
Serpini1	serine (or cysteine) peptidase inhibitor, clade I, member 1	-2.74183
St14	suppression of tumorigenicity 14 (colon carcinoma)	-2.93767
Adamtsl3	ADAMTS-like 3	-3.44925
Tgm4	transglutaminase 4 (prostate)	-3.47243
Cst6	cystatin E/M	-3.91174
Adamtsl5	ADAMTS-like 5	-4.44578
Adam11	a disintegrin and metallopeptidase domain 11	-4.47774
Serpina1b	serine (or cysteine) preptidase inhibitor, clade A, member 1B	-4.65401
Timp4	tissue inhibitor of metalloproteinase 4	-5.02362
Adamts20	a disintegrin-like and metallopeptidase (reprolysin type) with thrombospondin type 1 motif, 20	-5.24097
Timp3	tissue inhibitor of metalloproteinase 3	-6.29429
Prss12	protease, serine 12 neurotrypsin (motopsin)	-7.34465
Kazald1	Kazal-type serine peptidase inhibitor domain 1	-7.84175
Serpinb12	serine (or cysteine) peptidase inhibitor, clade B (ovalbumin), member 12	-7.99421
Hyal4	hyaluronoglucosaminidase 4	-8.56204
Adamts8	a disintegrin-like and metallopeptidase (reprolysin type) with thrombospondin type 1 motif, 8	-10.2807
Ky	kyphoscoliosis peptidase	-10.911
Serpinb13	serine (or cysteine) peptidase inhibitor, clade B (ovalbumin), member 13	-11.4664
Ctsw	cathepsin W	-11.8538
Serpinb7	serine (or cysteine) peptidase inhibitor, clade B, member 7	-13.1522
Serpinb11	serine (or cysteine) peptidase inhibitor, clade B (ovalbumin), member 11	-14.5289
Serpina5	serine (or cysteine) peptidase inhibitor, clade A, member 5	-14.6445
Kng1	kininogen 1	-18.0972
Plg	plasminogen	-18.9694
Serpina12	serine (or cysteine) peptidase inhibitor, clade A (alpha-1 antiproteinase, antitrypsin), member 12	-40.3216
						Axolotl	Acomys
Glycsaminoglycan chain modification	Gene Name	Day 7 fold change		Glycsaminoglycan chain modification	Gene Name	Day 7 fold change	Day 7 fold change
Sulf1	sulfatase 1	9.98148		Chst11	Sulfation at the 4‐O postion of GalNAc untis (CS)	2.15	3.97331
Sulf2	sulfatase 2	3.2977		Sulf1	Desulfation of the 6‐O positon of 6‐O sulfated GlcNAc and GlcNS units (HS)	15.21	9.98148
Chst11	carbohydrate sulfotransferase 11	3.97331		Chst2	Sulfation at the 6‐O postion of GalNAc untis (CS)	17.97	2.78082
Chst12	carbohydrate sulfotransferase 12	2.39843
Chst14	carbohydrate (N-acetylgalactosamine 4-0) sulfotransferase 14	2.55305
Hs2st1	heparan sulfate 2-O-sulfotransferase 1	1.79714
Chst15	carbohydrate (N-acetylgalactosamine 4-sulfate 6-O) sulfotransferase 15	-1.94835
Chst2	carbohydrate sulfotransferase 2	2.78082
Hs3st6	heparan sulfate (glucosamine) 3-O-sulfotransferase 6	-1.75615
Sumf2	sulfatase modifying factor 2	-1.45899
Sumf1	sulfatase modifying factor 1	1.25579
