# Supplementary material for: Matrisomal components involved in regenerative wound healing in axolotl and Acomys: implications for biomaterial development
Source: Royal Society of Chemistry journal article supplement (doi:10.1039/d3bm00835e), 2023-01-01
Supplement: d3bm00835e8.xlsx [file d3bm00835e8.xlsx]

## Sheet: 1. Raw data acomys 
Gene symbol	Sequence ID (Acomys)	Acomys D5	Acomys D10	Acomys D15	Acomys D20
Hmcn1	comp465253_c1	0.571361	1.28813	1.90841	1.51749
Dchs1	comp462840_c4	0.188011	1.53548	1.90191	1.84594
Svep1	comp465123_c19	0.425944	0.0401295	-0.364018	-0.546103
Fat1	comp464560_c11	0.317705	0.55137	0.936826	0.98247
Birc6	comp465219_c9	0.197837	0.126459	0.0375865	0.000626331
Celsr1	comp464873_c14	0.107605	-0.269923	-0.476634	-0.424982
Celsr2	comp464454_c1	-0.0314629	-0.180888	-0.461358	-0.242987
Megf8	comp464888_c5	0.123306	0.661539	0.922937	0.659313
Fbn2	comp465172_c16	-0.571605	1.76009	2.56539	2.89422
Utrn	comp465232_c29	-0.938664	-0.495461	-0.582278	-0.74779
Ankhd1	comp464970_c0	0.140841	-0.124932	-0.260056	-0.355227
Nsd1	comp464730_c6	0.102064	0.0493288	0.0510163	-0.0104204
Setd2	comp464780_c23	-0.088041	-0.0856746	-0.106067	-0.214364
Dock11	comp465127_c4	-0.358603	-0.383406	-0.477243	-0.560929
Tanc2	comp464476_c7	0.262319	0.169868	0.255518	0.240656
Ryr1	comp465091_c12	-1.31957	-0.917243	-0.8597	-1.43067
Snrnp2	comp464858_c12	0.448014	-0.0220129	-0.0487171	-0.0115878
Utp2	comp465202_c9	0.650796	0.113023	-0.0275837	0.0402645
Sorl1	comp465116_c22	1.28737	-0.350898	-0.332004	-0.218117
Dsp	comp464478_c20	0.464807	-0.0584839	-0.437457	-0.448586
26157B11Rik	comp464566_c14	0.676041	0.506891	0.417047	0.233289
Hivep2	comp458053_c17	-0.375495	-0.289342	-0.0734139	-0.501836
	comp464790_c4	0.322879	0.03404	-0.0781157	-0.204363
Fat2	comp464202_c27	0.694524	-0.217132	-0.240943	-0.177075
	comp465027_c17	0.676185	0.302388	0.120202	0.253209
Hipk3	comp461481_c8	-0.0206957	-0.227346	-0.37807	-0.411486
Cep29	comp465004_c0	-0.262469	-0.230933	-0.137606	-0.207694
Abca2	comp464685_c0	-0.812635	-0.394353	-0.368755	-0.460494
Herc2	comp465217_c6	0.0877089	0.178092	0.108056	0.0733063
Mll1	comp463907_c4	-0.260357	-0.288825	-0.204317	-0.337184
Nbeal1	comp465115_c14	-0.946709	-0.687351	-0.70166	-0.622082
Myof	comp465088_c9	0.457624	0.540143	0.411221	0.261863
Speg	comp458752_c20	-1.59435	-0.316984	0.0883307	-0.304745
Spnb2	comp464751_c0	-0.764756	-0.790627	-0.832318	-1.0654
Mtap1b	comp459024_c3	-0.0560985	0.422783	0.33482	-0.271475
Dync1h1	comp465054_c4	0.396779	0.322733	0.253928	0.170898
Dmxl2	comp464005_c13	1.91936	1.0322	1.09808	0.939771
Nhs	comp456849_c11	-0.0733393	0.173413	0.241776	0.343913
Chd8	comp464808_c3	0.00540923	0.0292707	0.0322774	-0.000456558
Rai1	comp462814_c36	-0.566132	-0.365405	0.0306877	0.031885
Cnot1	comp465175_c9	0.441779	0.13084	0.0280613	-0.0242551
Col6a6	comp461735_c0	-2.16231	-0.024279	0.68285	0.453743
Upf2	comp464405_c17	-0.121091	-0.25427	-0.371063	-0.462645
Zfp462	comp463872_c6	-1.48735	-0.819163	-0.576256	-0.704945
Acacb	comp465085_c3	-0.384812	-0.571858	-0.974101	-0.99019
Syncrip	comp463525_c35	-0.471427	-0.593347	-0.431519	-0.484269
Trrap	comp465221_c10	0.31921	0.309013	0.457114	0.309946
Itpr2	comp465122_c28	0.451211	0.368646	0.140956	0.0437229
Col4a5	comp464002_c10	-1.31863	-0.701184	-0.480214	-0.749598
Bcl9	comp456506_c33	-0.0631306	0.225091	0.514034	0.457414
Col14a1	comp464611_c12	-0.695602	0.86316	1.37476	0.668006
Dmxl1	comp464775_c0	0.333267	0.0789456	-0.183722	-0.223499
Lrrk2	comp465106_c1	0.888014	0.311705	0.458005	0.427435
Lrp1	comp465189_c8	0.77002	0.399208	0.23263	0.0412102
Znfx1	comp461663_c2	0.346922	-0.024738	-0.111815	-0.25969
Fat4	comp463244_c4	-1.29248	-0.0576629	0.574877	0.561207
Ppl	comp464748_c2	0.140063	0.192041	-0.04962	-0.151211
Fn1	comp465100_c4	1.69882	4.04951	3.63086	3.07459
Tln1	comp465076_c2	1.08424	0.964121	0.897975	0.516155
Igf1r	comp463753_c5	0.114022	-0.167586	-0.276655	-0.373466
Ash1l	comp464372_c1	-0.215551	-0.337098	-0.358458	-0.416555
Nova1	comp454546_c25	-0.647287	0.244271	0.621988	0.510817
Ahdc1	comp454391_c19	-0.244425	-0.072582	-0.0425687	-0.338174
Srrm2	comp457830_c15	0.327268	-0.0116006	0.0303944	-0.122567
Rere	comp463756_c25	-0.14274	-0.307892	-0.0773677	-0.150134
Bcorl1	comp463303_c8	-0.454215	-0.194362	-0.0395669	-0.243678
Spnb3	comp463392_c5	0.172584	-0.105962	-0.394554	-0.38935
Grlf1	comp454215_c17	-0.239475	-0.110048	0.0972332	0.00227736
Atrn	comp465081_c29	0.172921	0.163755	0.110532	0.0316622
Trip11	comp464655_c20	-0.0378173	0.0316608	0.0226158	-0.0385244
Myo7a	comp463892_c4	0.566408	-0.139199	-0.388619	-0.774005
Odz2	comp464623_c22	-0.412693	-0.47683	-0.157444	-0.0839667
Odz3	comp465040_c21	-0.610275	0.0891001	0.59287	0.62671
Obsl1	comp458348_c17	-0.104038	0.910948	1.07244	0.602457
Atp7a	comp464537_c14	0.143679	0.113029	-0.129995	-0.243009
Lamc1	comp463960_c9	0.0928293	0.106642	0.076031	-0.0218955
	comp464825_c9	-0.478216	0.53154	0.986393	0.828104
Dst	comp464952_c13	-0.626129	0.0209078	0.149714	-0.115847
Nav3	comp465050_c14	0.259547	0.473718	0.756883	0.492309
Baz1b	comp464101_c11	0.286823	0.0297336	0.0937331	-0.0487452
Vcpip1	comp453786_c32	0.357806	0.119064	0.0220221	-0.104048
Rc3h2	comp464713_c10	-0.0380203	-0.0143453	-0.129756	-0.149288
Smg6	comp463610_c7	-0.184793	-0.000700257	0.00259126	-0.13079
Setbp1	comp461699_c3	-0.572851	-0.47038	-0.168699	-0.173041
Epc2	comp462599_c27	-0.202268	-0.336229	-0.423769	-0.391617
Rc3h1	comp464878_c30	0.273297	-0.0353437	-0.0902275	-0.126708
Pcdh7	comp453520_c3	0.953679	0.543239	0.806725	0.7693
Nup16	comp464879_c11	0.805163	0.124515	0.168895	0.199977
Vprbp	comp464968_c26	0.240826	0.0362367	-0.0206809	-0.0938998
	comp464155_c13	-2.13805	-1.75882	-1.91176	-2.85142
Tpr	comp465093_c2	0.352205	0.0368138	0.00910755	-0.0740366
Myh4	comp465248_c7	-3.03753	-2.63949	-2.37591	-3.37098
Adamts6	comp464872_c8	0.456275	1.58104	1.32477	1.29315
Ranbp2	comp463950_c6	0.473233	-0.0297451	-0.203657	-0.294938
Slit3	comp464710_c9	-0.154242	-0.363803	0.000879797	0.0593117
9831H6Rik	comp462854_c20	0.553346	0.869675	1.12946	0.697903
Tep1	comp465094_c7	-0.102733	-0.165733	-0.124222	-0.32042
	comp463882_c2	0.368306	0.106611	0.415563	0.0788585
Pds5b	comp464957_c23	-0.127542	-0.191861	-0.0460673	-0.187608
Zbed4	comp453830_c26	0.78748	0.309019	0.272501	0.174745
Prex2	comp465236_c6	-1.11028	-0.982402	-1.19504	-1.06656
Ift14	comp464339_c10	-0.15641	-0.146816	-0.0172133	-0.0294117
Hipk2	comp462991_c20	-0.0879911	-0.341087	-0.415974	-0.574748
Taf1	comp465251_c4	0.689366	0.411933	0.396193	0.342395
Trps1	comp458391_c9	-0.16535	-0.392791	-0.232774	0.0541361
Rapgef2	comp464869_c27	-0.411852	-0.431786	-0.451328	-0.544401
Fhod3	comp463120_c26	-0.81144	0.271764	0.909918	0.743959
Bcl9l	comp464640_c22	-0.165082	0.033027	0.302645	0.0398432
Arhgap5	comp456991_c0	-0.734861	-0.760281	-0.788123	-0.741615
Col22a1	comp450885_c1	-2.04992	-0.898599	-0.113194	-0.645388
Tcf2	comp452658_c17	-0.242713	-0.231955	-0.282448	-0.23382
Agl	comp464852_c8	-1.18813	-1.0187	-1.37399	-1.48553
Tanc1	comp463670_c27	-0.723456	-0.563086	-0.536989	-0.524712
Arid1a	comp463730_c15	0.215534	-0.0620707	0.0477185	-0.102353
Hmgxb3	comp462515_c3	0.297855	0.120494	0.107113	0.131485
Anapc1	comp465114_c9	0.306383	0.191638	0.322965	0.199174
Atrx	comp464143_c1	-0.322813	-0.0728206	0.148338	-0.000972089
D4342O9Rik	comp463788_c13	-0.533521	-0.428108	-0.281703	-0.483815
Iqgap2	comp464106_c14	0.992546	0.956399	0.908833	0.860969
Rad54l2	comp464598_c5	0.467924	0.245233	0.115825	0.139765
Zfp142	comp460536_c12	-0.2096	-0.048237	0.132239	-0.049163
Btbd11	comp463807_c27	0.530087	0.297545	0.158135	0.0604913
Crebbp	comp463051_c2	0.0387717	-0.147435	-0.114195	-0.186923
Fasn	comp464183_c1	-0.147091	-0.645986	-0.882582	-0.810382
Ddx3x	comp461489_c33	0.644957	0.176282	-0.0605973	-0.0459721
Trpm7	comp464904_c16	0.110061	-0.12377	-0.170613	-0.120439
Abcc1	comp465020_c13	0.213358	-0.0142507	-0.190813	-0.194171
Rsf1	comp461984_c21	-0.182773	-0.115518	-0.11662	-0.246815
Adcy9	comp462492_c8	-0.00382125	-0.0751035	0.113059	-0.0202614
Myom2	comp453654_c1	-1.60908	0.174602	0.159827	-0.931041
Hectd1	comp463679_c19	0.0489506	0.0161482	-0.205641	-0.21217
Cpsf1	comp462339_c3	0.0243074	-0.0878196	0.02607	0.054056
Plekhh1	comp456628_c5	0.57981	0.0103344	0.0743963	-0.200323
Zfp148	comp462292_c22	-0.18155	-0.23955	-0.178228	-0.14855
Flt4	comp463405_c15	0.119068	0.389431	0.275144	0.102631
Helz	comp464674_c13	0.121618	0.0128104	0.0272996	0.0286096
Med13	comp462496_c16	0.147471	0.000552126	-0.184608	-0.17299
Insr	comp463778_c28	0.370433	-0.270804	-0.643464	-0.750548
Duox1	comp463971_c9	1.00634	0.275537	-0.103196	-0.531163
Arhgap32	comp464199_c17	-0.0849232	-0.257428	-0.495563	-0.366968
Szt2	comp465152_c6	0.262226	0.222324	0.282351	0.146663
Smarca2	comp465234_c31	-0.018136	-0.0789548	0.00836422	-0.0844953
Rock2	comp464688_c2	0.0702854	-0.0189157	-0.0868499	-0.31327
Kif26a	comp463086_c13	0.0828308	0.374904	0.206648	0.208248
Tnks2	comp465117_c20	0.336166	0.232877	0.195661	0.080982
Atm	comp465229_c13	0.0145468	-0.0334697	-0.0188985	-0.0483583
Myst3	comp464999_c2	-0.14294	-0.267881	-0.256725	-0.353962
Btbd7	comp460413_c13	0.222759	0.145376	0.129719	0.0208875
Pcdh19	comp454324_c7	-1.05389	-0.403887	-0.306949	-0.525338
Kif21b	comp464117_c5	1.05828	0.588959	0.389414	0.199427
Adamts2	comp461160_c18	-0.165135	1.17556	1.48607	1.00296
Top2b	comp464942_c0	-0.101444	-0.00304584	-0.0378991	-0.0227541
Magi3	comp463607_c17	0.240152	0.490132	0.673734	0.460461
Ift122	comp464245_c26	-0.0748945	0.37269	0.902886	0.893694
Col5a1	comp465218_c10	0.549522	3.01435	3.09892	2.61037
Hspg2	comp465070_c3	0.225905	1.67652	1.86288	1.43023
Dhx3	comp460326_c14	0.205077	0.130202	0.13382	0.0365216
Adamts9	comp465262_c32	0.686063	1.44624	1.45166	1.16639
Gcc2	comp463821_c15	0.137868	-0.143005	-0.386501	-0.3971
Ppp1r9b	comp463224_c14	0.779653	0.594225	0.519629	0.25318
Atp1b	comp464692_c6	-0.578853	-0.147917	-0.343534	-0.244076
Mbd5	comp460189_c25	-0.392245	-0.178035	-0.020373	-0.0875558
Zeb2	comp464274_c18	0.25746	-0.16568	-0.0850761	-0.20846
Nup98	comp464625_c25	0.550298	0.155674	0.133039	0.0732116
Mex3c	comp461789_c32	0.814925	0.241562	-0.00923284	0.078996
Kpna3	comp463170_c5	0.358417	-0.0487378	-0.149851	-0.254659
Notch1	comp464253_c4	0.562351	-0.0596957	-0.115892	-0.062755
Myo9a	comp465108_c14	-0.129055	-0.149003	-0.11112	-0.252453
	comp453176_c8	-1.94339	-1.77496	-1.4953	-1.77877
Zmym3	comp462977_c5	-0.191784	-0.00592328	0.275334	0.238274
Cic	comp462331_c12	0.312621	0.232173	0.446358	0.123074
Arfgef2	comp464779_c15	0.246083	-0.050835	-0.307006	-0.282028
Pcx	comp459941_c2	-0.478917	-0.822999	-1.0717	-0.931899
Cand1	comp461607_c5	0.371934	0.322887	0.289447	0.236811
	comp452784_c5	-0.278983	-0.433951	-0.367032	-0.50968
Evpl	comp465207_c9	0.054942	-0.0836962	-0.365513	-0.40064
Plec	comp464661_c2	0.748249	0.633696	0.350373	0.0831044
Lats1	comp457352_c2	-0.00705491	-0.189319	-0.225909	-0.168272
Sdk1	comp458163_c1	0.840473	1.89922	2.19882	1.31586
Fgd1	comp464744_c0	0.568643	0.901748	1.00529	0.823153
Polr3a	comp464939_c22	0.341974	0.0114252	0.0115522	-0.0402666
Lama2	comp465216_c14	-1.26992	-0.848739	-0.687635	-0.474104
Cspg4	comp464436_c8	-0.474179	-0.600604	-0.815853	-0.844471
Rb1cc1	comp463523_c12	-0.504041	-0.485924	-0.553204	-0.533104
Cdh11	comp462171_c14	0.646674	1.9802	2.11074	2.11697
Myo18b	comp460908_c1	-1.19931	-0.858429	-0.860451	-2.11832
11137F2Rik	comp463837_c30	0.0184744	0.0205483	0.0133594	0.0395063
Gphn	comp464260_c23	-0.400584	-0.464473	-0.510143	-0.548111
Zbed6	comp464281_c20	0.0020406	0.0440757	0.0581081	0.00177423
Rbm27	comp464215_c1	0.281682	-0.00990872	-0.16897	-0.174841
	comp464959_c21	-0.0427113	-0.132014	-0.290939	-0.222542
Xpo1	comp464773_c9	0.739441	0.453179	0.350844	0.292312
Dysf	comp464353_c9	0.200364	0.531497	0.437638	-0.0366443
Pde4dip	comp464964_c24	-2.34956	-2.24462	-2.23582	-2.98523
Btaf1	comp464568_c11	0.321582	-0.0396781	-0.135905	-0.0588862
Cdh2	comp460029_c14	1.14409	2.59251	2.79294	2.59533
Taok1	comp464859_c17	0.0166042	-0.0829857	-0.166711	-0.254191
Bai2	comp457268_c4	-0.484724	0.262144	0.954655	1.02903
Atp1a1	comp462916_c26	1.6373	0.834402	0.491352	0.398388
Kdr	comp464620_c28	-0.355408	-0.205628	-0.446171	-0.779365
Ddb1	comp463495_c7	0.566663	0.640167	0.497282	0.406889
Nav2	comp463573_c25	-0.855648	-0.449951	-0.528956	-0.415561
4932438A13Rik	comp465247_c7	-0.161164	-0.344781	-0.416914	-0.40236
Arfgef1	comp465053_c18	0.222742	-0.134154	-0.203838	-0.240228
Myom3	comp459864_c3	-1.66719	-0.430508	-0.404847	-1.75625
Rreb1	comp458394_c0	0.452534	-0.0152372	-0.0953624	-0.169563
Mbnl1	comp461583_c0	-0.337209	-0.487673	-0.626952	-0.6438
Tulp4	comp455796_c16	0.140941	0.303277	0.423365	0.11168
Dsel	comp452633_c21	-0.801586	-0.461865	-0.356554	-0.367748
Ralgapa1	comp465034_c10	-0.388703	-0.461888	-0.556516	-0.525889
Flna	comp463318_c2	1.66549	1.9944	1.66865	1.30789
Plcg2	comp464819_c1	0.456084	0.056912	-0.492143	-0.538794
Bcr	comp464643_c0	0.116742	-0.278835	-0.403164	-0.550476
Mprip	comp463651_c20	0.0341708	0.328753	0.226319	0.0417005
Nos3	comp453743_c32	-0.286536	0.0716792	-0.4833	-0.958789
Bmpr2	comp462203_c4	-0.118269	-0.0440317	-0.171841	-0.281775
Dnajc13	comp465065_c8	0.698118	0.314347	0.135982	0.0502078
Nup155	comp465032_c15	0.827093	0.383911	0.282167	0.243641
Pappa	comp464188_c18	-0.605831	0.558471	0.679689	0.750782
Ubn2	comp463948_c19	-0.45369	-0.468237	-0.46524	-0.468776
Abca5	comp465006_c4	-0.80123	-0.435781	-0.235827	-0.0239232
Myh11	comp454722_c6	-0.700189	0.0423865	0.321794	-0.17677
Vps13a	comp465171_c0	-0.332865	-0.415436	-0.598963	-0.574157
Itga11	comp464283_c7	-2.18593	0.436786	1.2171	0.999386
Cubn	comp453262_c4	-0.812499	-0.0856496	-0.126375	0.150708
Nomo1	comp464033_c5	0.762719	0.057214	-0.174555	-0.241524
Fmnl2	comp464285_c2	0.748433	0.479152	0.756553	0.643684
Wdr44	comp463981_c7	-0.163759	-0.118832	-0.282763	-0.339106
Adcy3	comp464370_c44	-0.186839	0.0487258	0.053644	-0.0250777
Hr	comp463230_c19	0.0249681	-0.74316	-0.951048	-0.705365
Spnb1	comp431226_c2	-2.41987	-2.43819	-2.26145	-3.29569
Itga9	comp464967_c26	0.20932	0.715061	0.812815	0.832976
Ipo13	comp462198_c13	-0.0213886	-0.270328	-0.379143	-0.772396
Pcdh17	comp450507_c12	0.34586	0.278585	0.13002	-0.0569391
Smarca1	comp458177_c8	-0.332025	0.246935	0.478557	0.547571
Vps35	comp462584_c30	0.661603	0.232893	0.0211627	-0.0595225
Dhx38	comp462703_c3	0.803951	0.356282	0.162628	0.153835
Plxnc1	comp461110_c1	2.34783	1.31832	1.00873	0.63915
Gm158	comp462875_c8	0.0220862	-0.0262538	0.0723177	-0.0132283
Ext1	comp460244_c12	0.816665	0.649367	0.528352	0.290953
Zfhx4	comp453605_c30	-1.18805	0.323581	1.06139	0.923999
23167B1Rik	comp462103_c18	-0.234599	-0.0355238	-0.0517448	-0.339022
	comp461805_c7	0.87422	2.1726	2.24208	2.32631
Atp8b1	comp464567_c0	0.152092	0.263027	-0.174226	-0.545982
Pik3ca	comp464472_c3	0.167129	0.00938815	-0.114377	-0.110506
Mcf2l	comp464680_c2	-1.28894	-1.07466	-1.22768	-1.28429
Pcdh18	comp450542_c4	-1.05686	0.165493	0.915214	0.796129
Spna2	comp464929_c2	0.235269	0.119521	0.0380287	-0.1035
Vars	comp463241_c0	1.13037	0.741068	0.69807	0.5193
Sorcs2	comp464786_c19	-0.649345	1.34106	1.68095	1.36315
Nbea	comp464832_c16	-0.268423	-0.163337	-0.151401	-0.0802031
Scn7a	comp461987_c2	-1.78806	-1.1253	-0.949013	-1.03808
Kntc1	comp465151_c5	1.86283	1.19891	1.10952	1.02896
Myo6	comp464804_c15	-0.534143	-0.43053	-0.518605	-0.465491
	comp465017_c5	0.460619	0.24352	0.0395562	-0.00883186
Otud4	comp464617_c21	0.653094	0.342257	0.110983	-0.0209991
Pkd1	comp464865_c10	-0.1592	0.113731	0.192083	0.0934726
Gli2	comp460866_c10	-1.21444	-0.487244	0.354465	0.519806
Rbm12	comp458072_c7	0.356669	0.256977	0.234345	0.171141
Ttc21b	comp464618_c22	-0.447212	0.0582827	0.0958426	0.240349
Bmp1	comp461277_c3	0.478413	1.60742	1.68008	1.44392
Agap2	comp450422_c0	0.542935	0.262271	0.726317	0.410965
Atxn2	comp465263_c33	0.17673	0.15619	0.146779	0.0942008
Fam12a	comp462742_c6	0.482799	0.152995	0.12635	-0.0231878
Mbd6	comp460714_c20	0.156243	-0.144774	0.304734	-0.125735
Ctcf	comp459692_c2	0.0521201	-0.140733	-0.216273	-0.163968
Atrnl1	comp464302_c15	0.080452	0.96333	1.16548	1.1054
Mycbp2	comp465230_c11	0.174219	0.145288	-0.116089	-0.0694184
Plekha6	comp464497_c15	-0.97837	-1.32629	-1.5083	-1.6315
Patl1	comp461367_c21	0.495248	-0.0447257	0.0592253	-0.093266
Cand2	comp460705_c11	-0.0652608	0.43731	0.567018	0.124192
Heph	comp462409_c11	-0.429029	-0.276991	0.0529123	0.300515
Caskin2	comp460150_c14	-0.943108	-1.28612	-1.01071	-1.10315
Stt3b	comp462678_c1	0.777564	0.339024	0.205097	0.10761
Bnc2	comp462101_c11	-0.354874	0.856193	1.05278	0.933172
Mybl1	comp454999_c4	-0.657579	-0.629312	-0.607822	-0.751899
Chd4	comp464726_c10	0.403442	0.357334	0.466324	0.396847
	comp452390_c7	-0.449541	0.537165	-0.212791	-1.16621
Phka2	comp464826_c1	-0.724338	-0.313021	-0.196536	-0.186387
Mfhas1	comp451394_c31	0.635196	0.222231	0.175463	-0.0903075
Cilp	comp456761_c0	-1.70168	-0.337593	0.0138423	-0.716648
Axin1	comp460406_c23	0.247826	0.11428	0.0448225	0.0396816
Abl2	comp464204_c15	0.740076	0.391922	0.35127	0.272145
Vldlr	comp460819_c11	-1.60743	-1.21216	-1.04442	-1.22651
Myo1d	comp464127_c34	-0.0279669	-0.118262	-0.4391	-0.548633
Crim1	comp464168_c49	-0.365311	-0.871349	-0.935795	-0.902987
Cask	comp463848_c10	-0.0704752	0.14583	0.203748	0.179067
Ints2	comp464962_c0	1.25076	0.89273	0.81088	0.698045
Pacs1	comp463262_c2	0.538498	0.500095	0.796947	0.575405
Ints5	comp456409_c20	0.886289	0.654262	0.583511	0.462907
Cnot4	comp461567_c19	-0.122557	-0.24389	-0.277171	-0.206348
Megf1	comp450841_c0	-0.0116471	1.22783	1.52566	1.12614
Mybpc2	comp450330_c0	-2.82858	-2.65417	-1.98623	-4.10859
Pcf11	comp456211_c1	-0.0197079	-0.320124	-0.503483	-0.369077
Ncdn	comp451248_c2	0.70677	0.404579	0.467577	0.215061
L1cam	comp463003_c7	0.890922	0.265708	0.348029	0.178024
Zfp521	comp461420_c14	-0.88232	0.195519	0.647806	0.55156
Tm9sf3	comp459522_c16	0.709449	0.56177	0.369405	0.270039
Rbm15	comp458289_c20	0.270539	-0.0458872	0.0340202	-0.127247
Map3k9	comp462473_c2	0.868086	0.593212	-0.0479276	-0.0671449
Fbn1	comp464018_c10	0.473254	1.3061	0.94086	0.580277
Kif1a	comp460784_c2	0.522992	1.50268	1.40416	1.09931
Atp11a	comp464077_c4	-0.149216	-0.229591	-0.45414	-0.521977
Adam1	comp462726_c16	0.664096	0.391162	0.12486	0.0554381
Myo1f	comp464412_c6	2.9208	1.60863	1.20379	0.836633
Filip1	comp451213_c4	-0.56068	-0.251796	-0.190777	-0.741893
Atp13a3	comp464596_c16	0.521236	0.30572	0.115453	0.0541768
Ints3	comp463894_c28	0.580012	0.325671	0.237264	0.232427
Pcdh9	comp456700_c20	-0.404696	1.53862	2.14344	2.18833
Tbc1d8	comp462087_c0	0.294004	-0.101971	-0.399788	-0.462062
Topbp1	comp463191_c19	0.465715	0.0654066	0.085099	-0.051531
Jarid2	comp462861_c15	0.738381	0.257305	0.0461285	-0.0349358
Dab2ip	comp463480_c12	-0.44224	-0.0255014	-0.0874573	-0.249755
Gpr125	comp463901_c35	-1.09109	-0.670642	-0.550859	-0.466795
Ythdf1	comp451250_c13	0.0644392	-0.0651191	-0.167559	-0.194138
Ptk7	comp459824_c12	0.872965	1.74634	1.94131	1.85626
Lrrc16a	comp465064_c5	0.127452	0.119945	0.128103	0.136163
Usp4	comp464631_c13	-0.00793001	0.0618726	0.0972325	0.0069806
Filip1l	comp367391_c0	-0.24628	0.255584	0.190846	-0.274596
Ncapd2	comp463064_c1	1.25205	0.779806	0.905524	0.790763
Tie1	comp459569_c1	-0.00431744	-0.0352072	-0.264827	-0.335622
Nbeal2	comp465039_c4	1.11528	0.393983	0.15289	0.103734
Syne1	comp465015_c4	-0.991688	-0.680767	-0.567992	-0.454233
Kpnb1	comp463123_c16	1.20566	0.70897	0.591134	0.376793
Dagla	comp462563_c13	-0.202776	-0.138284	0.0898144	-0.0607826
Samd9l	comp455352_c5	0.578571	-0.253907	-0.251332	-0.677591
Secisbp2l	comp462946_c10	-0.313266	-0.825197	-1.19583	-1.11899
BC3223	comp461310_c20	0.136177	-0.101445	-0.167343	-0.209691
Fndc3b	comp464096_c1	0.00688262	0.661074	0.796469	0.613999
Tll1	comp463858_c1	-0.684064	-0.391766	-0.420198	-0.749833
Adamts1	comp463759_c30	-0.630573	-0.198423	0.0631134	0.0239678
Tmem63b	comp464203_c8	0.177326	-0.000985637	-0.0896373	-0.122694
Sel1l3	comp461472_c7	-1.32847	-1.32661	-1.26827	-1.64777
Nup21	comp459915_c2	2.34871	1.63943	1.80919	2.0277
Brpf1	comp459343_c16	0.209637	-0.035263	-0.0515221	-0.152735
Irs1	comp463137_c3	-0.406857	-0.448371	-0.226419	-0.266892
Ltbp1	comp464827_c7	0.589785	1.0102	0.821271	0.452857
Bicd2	comp456753_c11	0.657142	0.432483	0.204318	0.107249
Usp32	comp464080_c9	0.426181	-0.0772272	-0.196127	-0.235699
Shank2	comp460420_c12	-0.686444	1.94346	2.71133	2.21563
Col7a1	comp465194_c1	0.322954	2.30301	2.66846	2.55819
Usp31	comp463592_c0	-0.170372	-0.377016	-0.40055	-0.438873
Nkrf	comp464203_c2	0.713491	0.214094	0.27628	0.0294992
Fam126b	comp463143_c15	0.193492	-0.527359	-0.635543	-0.52965
Prrc2a	comp460650_c5	0.545739	0.458476	0.621234	0.354181
Pik3cg	comp459529_c12	2.60071	1.69841	1.43908	1.11635
Plcl2	comp453123_c10	0.32807	0.469468	0.293514	-0.0158788
Tiparp	comp452676_c11	1.02306	0.112388	-0.210015	-0.267269
Cnnm2	comp451140_c5	-0.416986	-0.209147	-0.0757941	0.203926
Dennd5a	comp464182_c0	0.221994	0.246597	0.355415	0.166053
Apaf1	comp465046_c3	0.875013	0.844143	0.995027	0.823554
Dhx8	comp464252_c19	0.318391	0.094262	0.0244847	0.0113727
Sipa1l1	comp461882_c29	0.208931	0.0947183	0.214002	0.0916781
Dhx37	comp464232_c13	-0.202806	-0.324134	-0.397453	-0.327881
Msh6	comp459238_c15	0.041059	-0.457219	-0.30858	-0.10489
Unc5a	comp450442_c0	2.0957	1.32898	0.953202	0.519647
Thrap3	comp462835_c1	0.363315	0.0389423	0.0276298	-0.085069
Cse1l	comp463846_c6	0.886918	0.252649	0.0612597	0.100577
Fhdc1	comp457129_c22	-0.643553	-0.648255	-0.865293	-0.716299
Cltc	comp464569_c32	1.4536	0.835971	0.563046	0.420664
Nbas	comp465197_c12	0.304505	0.414342	0.461431	0.389648
Akap6	comp461325_c17	-1.77353	-1.30264	-1.29876	-2.30623
Ccdc141	comp455181_c0	-0.824369	1.46479	1.48439	0.298262
Tdrd7	comp463732_c3	0.0182873	0.0733371	0.0406943	-0.125668
Fem1b	comp452687_c9	0.310679	0.128349	0.0383586	0.0458501
Fam179b	comp464659_c13	-0.135431	-0.0827556	0.0439772	0.0479205
Dhx4	comp462403_c11	-0.140878	-0.126562	-0.243431	-0.15067
Rgnef	comp464731_c21	-0.682264	-0.312976	-0.294062	-0.335739
	comp463246_c13	0.724357	0.276169	0.17459	0.0841763
Ocrl	comp463839_c16	0.3793	0.0539936	-0.0958177	-0.120125
Ptprf	comp465118_c4	0.370857	0.308763	0.317021	0.168838
	comp463146_c9	2.48363	1.40117	1.15623	0.818579
Ano1	comp463787_c2	-0.0809595	0.0597992	-0.505923	-0.312436
Slc4a2	comp462520_c0	0.904606	0.701584	0.72073	0.50496
Asap1	comp462519_c17	0.698183	0.323655	0.420279	0.393106
Hephl1	comp460199_c15	-0.462551	0.821953	0.0799544	0.182409
Adcy2	comp464208_c13	-1.20595	0.163456	0.514053	0.221806
Lamc2	comp462886_c1	2.99654	1.91932	1.25562	0.971332
Lars	comp464544_c20	0.775385	0.456879	0.254339	0.291307
Atp9a	comp464668_c20	-0.265196	-0.124632	-0.384543	-0.383084
Stard8	comp460856_c2	0.675147	-0.200888	-0.349658	-0.862826
57359G19Rik	comp460585_c0	2.0244	1.25493	1.15202	1.25275
Erbb3	comp464725_c5	-0.0776593	-0.439423	-0.836754	-0.632701
Fmnl3	comp463795_c6	0.463843	1.08066	1.208	1.10944
Ncam1	comp462972_c8	-0.053434	1.24459	1.34681	0.993418
Tiam2	comp464178_c0	0.147591	0.715192	1.08398	0.926884
Tbcd	comp464843_c3	0.687456	0.710009	0.644333	0.54724
Hic1	comp447924_c1	0.560017	1.66155	1.74605	1.02841
Fat3	comp436334_c0	-1.27224	0.980807	1.33789	0.704655
Zbtb2	comp464040_c22	-1.26022	-0.743433	-0.449185	-0.631542
Kif23	comp464518_c15	1.18513	0.500505	0.416426	0.41009
Zc3h12c	comp453951_c5	1.3238	0.465438	0.310361	0.211223
Ski	comp452029_c6	0.164559	0.105231	0.330198	0.090964
Med14	comp464911_c24	0.797294	0.352097	0.18879	0.158352
Atp2a3	comp463268_c4	-3.18813	-3.29932	-3.17269	-3.74336
Taf2	comp464359_c20	0.573322	0.395927	0.267305	0.217028
Ythdc2	comp464639_c26	-0.0736587	-0.113045	-0.243128	-0.153585
	comp458615_c1	0.0990243	-0.0715498	-0.243055	-0.232571
Itga8	comp464024_c3	-1.27241	-1.29972	-0.48429	-0.319733
Zfp687	comp459511_c13	0.220433	0.200091	0.332981	0.0475623
Dlg4	comp462651_c8	-0.4698	0.217671	0.827716	0.546354
Tnik	comp464110_c15	-0.570713	-0.402607	-0.350693	-0.379312
Eif3a	comp463235_c9	0.538885	0.278349	0.147217	-0.0126051
Mov1	comp460629_c2	0.541783	0.405312	0.598556	0.299689
Tti1	comp456800_c23	0.0788852	-0.0979371	-0.084284	-0.16792
Rrp12	comp465008_c6	0.307652	0.147186	0.122443	0.0596419
Zhx1	comp460612_c34	-0.486062	-0.494256	-0.510132	-0.651502
Osbp	comp460778_c9	0.0502896	-0.0400881	-0.0855847	-0.170241
Cad	comp464986_c0	1.43276	0.783813	0.783447	0.763263
	comp461369_c17	0.235963	-0.0871825	-0.0940411	-0.113609
Smg1	comp464855_c5	0.22039	0.0402809	-0.0170444	-0.0943567
Kat2b	comp463645_c0	-0.373038	-0.571803	-0.802664	-0.889208
Nup153	comp464702_c15	0.244626	-0.189724	-0.236541	-0.259526
Ptk2	comp464100_c20	0.323898	0.351558	0.420637	0.326211
Fnip1	comp462728_c10	0.365401	0.197497	0.209515	0.142128
Plagl2	comp455062_c9	-0.0336983	-0.194837	-0.384125	-0.560016
Adcy1	comp457653_c6	-1.12323	-0.738548	-0.251663	-0.400523
Drosha	comp464556_c33	-0.497233	-0.361332	-0.188023	-0.199434
Rev3l	comp464220_c18	-0.262979	-0.413142	-0.194156	-0.0830206
Samd4b	comp461084_c0	0.578464	0.32312	0.337743	0.136258
Atp9b	comp463521_c5	0.162321	0.124715	0.102678	0.0774459
Grip2	comp450117_c1	-0.722264	-0.498509	-0.761703	-1.03537
Copb2	comp455791_c1	0.67028	0.62401	0.373533	0.268737
Fam38a	comp464866_c12	0.712233	0.624327	0.560479	0.300892
Ntn1	comp450983_c14	-0.450826	-0.288997	0.323026	0.117952
Kcnq5	comp459342_c4	-1.101	-1.13941	-1.23551	-2.01086
Cdc42bpg	comp464323_c8	0.0406354	-0.382056	-0.698972	-0.599307
Clip2	comp463554_c18	-0.211782	0.495147	0.842196	0.641892
Slc4a4	comp464086_c16	-1.10022	0.456284	1.44846	1.08815
Plcl1	comp453674_c21	-1.3904	-0.577556	-0.341513	-0.625073
Dbc1	comp452922_c22	2.2905	3.05168	2.91284	2.9193
Atg9a	comp460703_c8	0.311795	0.214923	0.194393	0.0106655
Atg2a	comp464451_c2	0.426837	0.2595	0.0996228	-0.050574
Scn4a	comp456110_c0	-2.03943	-1.68054	-1.78454	-2.36558
Igsf3	comp461298_c14	1.80887	1.91309	2.16131	2.00542
Rfx7	comp458408_c4	-0.159151	-0.215002	-0.180229	-0.161694
Matr3	comp463579_c22	-0.10755	-0.210426	-0.238982	-0.200128
Nup133	comp464121_c18	1.12966	0.501394	0.560385	0.486412
Tsc2	comp464810_c11	-0.222756	-0.180939	-0.132773	-0.172904
Ireb2	comp463682_c5	0.266634	0.30298	0.256317	0.223371
Siglec1	comp461848_c14	2.62524	0.728906	0.87859	-0.0414493
Dennd4a	comp464595_c28	0.624204	0.0494242	0.113315	0.0909184
Jak1	comp464573_c19	0.695849	0.106695	-0.076464	-0.188512
Egflam	comp465026_c17	-1.16956	0.286004	0.695634	0.628673
	comp464875_c1	-0.198756	-0.200605	-0.212971	-0.287778
Armc5	comp455658_c6	0.288002	0.379671	0.587752	0.459605
Arhgef12	comp464791_c18	-0.119025	-0.174265	-0.293286	-0.280448
Atp2b4	comp463574_c15	-0.574713	-0.511496	-0.749249	-0.658813
Ascc3	comp464582_c23	0.386933	0.332201	0.20527	0.173004
Rb1	comp464490_c6	-0.593117	-0.704709	-0.88228	-0.82603
Aqr	comp465014_c21	0.474577	0.207991	0.0957941	0.132124
Tbc1d2b	comp460302_c8	0.514033	0.69821	0.698168	0.404622
Zfp281	comp463823_c29	0.813325	0.731705	0.748389	0.630184
Eml3	comp465160_c12	0.436276	0.162026	-0.0271419	0.020892
Ankrd17	comp462007_c0	0.263168	0.0314641	-0.000758586	-0.0623381
Smo	comp458554_c3	0.198829	0.493343	0.824805	0.757091
Mir715	comp452976_c2	-1.98193	0.778707	-1.81892	-1.99725
Fgd5	comp457755_c2	-1.12354	-0.855735	-0.64973	-1.00072
Thoc2	comp465028_c5	-0.224064	-0.257753	-0.306582	-0.320391
Srcin1	comp462898_c11	-1.17822	-0.0993399	-0.373176	-0.466361
Ptch2	comp459758_c0	-1.02983	-1.16591	0.138299	0.961909
	comp457963_c4	0.553924	0.301524	0.471578	0.348003
Ctnnd1	comp464632_c28	0.445385	0.321022	0.19276	0.0330999
Smarca5	comp464316_c18	0.445079	0.0970235	-0.0225294	-0.0342728
Dctn1	comp463873_c22	0.4888	0.538878	0.553463	0.364662
Xylt2	comp458616_c0	0.107714	0.35394	0.584258	0.33998
	comp462179_c8	0.279577	-0.0387719	-0.0876439	-0.0251595
Khdrbs1	comp456759_c12	0.547668	0.472181	0.5114	0.429126
Zdhhc8	comp461726_c4	-0.353337	0.072823	0.292854	0.0686453
Tmem132a	comp457654_c13	0.709948	0.964721	1.08584	0.839602
Ints8	comp464522_c13	0.304618	0.134797	0.015917	0.0994464
Dennd3	comp462589_c13	1.58495	0.622848	0.627768	0.645736
Enpp2	comp462763_c15	0.0349081	-0.79653	-1.12873	-1.13542
Adnp	comp455924_c14	0.131859	0.224622	0.385063	0.318401
Lamc3	comp461739_c3	-1.80167	-1.1887	-0.921401	0.53672
Dlc1	comp463478_c21	-0.602402	-0.512452	-0.469898	-0.748737
Abcb9	comp453598_c5	1.07046	0.209283	0.0906284	0.0114965
Zfp68	comp460187_c27	-0.0811042	0.0756408	0.159607	0.132865
Shank3	comp456565_c28	-0.351831	-0.090243	0.0698536	-0.313879
Zbtb1	comp455006_c5	-0.2983	-0.150664	-0.252096	-0.215297
Erbb2	comp464108_c1	0.102542	-0.0595652	-0.182975	-0.112516
Stox2	comp455565_c38	-0.500237	-0.313812	-0.236097	-0.337961
Cul3	comp462635_c1	-0.196102	-0.176034	-0.517277	-0.48259
Tnks	comp464693_c22	0.0131571	0.0325939	0.140317	0.125193
Ralgapa2	comp465089_c2	0.107106	0.390074	-0.188761	-0.170944
Copb1	comp462422_c8	0.638637	0.554342	0.474332	0.374056
Zfp423	comp457152_c21	-0.632022	0.614712	0.788654	0.570385
Ppfia3	comp464380_c13	0.256821	0.148392	-0.118528	-0.0820814
Polr1b	comp460825_c0	0.914576	0.207296	0.122504	-0.0396451
Map3k11	comp456331_c20	0.786959	0.178975	0.0176284	-0.13094
Bbx	comp463136_c23	-0.165375	-0.114313	0.0136465	-0.0120486
Fam19b	comp459571_c22	-0.496372	-0.259566	-0.364147	-0.391324
Slc6a17	comp453228_c3	1.95578	3.04784	4.07939	4.36013
Zfx	comp462071_c19	0.28482	0.237318	0.123488	0.0856094
Lama5	comp465153_c3	0.0612924	0.0934959	-0.067919	-0.140374
Furin	comp461906_c18	1.34506	1.00589	0.680858	0.49366
Tnc	comp464237_c9	4.00923	5.99326	5.58407	5.29582
Pnpla6	comp464681_c23	0.363644	0.149263	0.124997	0.118422
Lamb3	comp463895_c6	1.44141	0.342653	-0.0302598	-0.374018
Prpf8	comp464559_c0	0.463457	0.00952102	-0.000685503	-0.038008
Trp53bp2	comp463253_c18	-0.270034	-0.36514	-0.590059	-0.587424
Disp1	comp457421_c9	-0.696354	-0.326137	0.0138192	0.101083
Plcb2	comp462602_c1	1.79875	1.32327	0.998404	0.745502
Rbm15b	comp455043_c45	0.496756	0.49606	0.435825	0.27587
Cdkl5	comp461920_c1	-0.470291	-0.433405	-0.379486	-0.312345
Fzd3	comp455603_c3	-0.562455	-0.422528	-0.349597	-0.180511
Scube3	comp451026_c12	-0.776495	0.355855	1.12163	1.372
Taok3	comp463851_c21	0.976597	0.397539	0.215338	0.0142736
Tex1	comp462971_c24	0.523481	0.32461	0.274835	0.28154
Tnrc6b	comp456767_c26	-0.319402	-0.2584	-0.227476	-0.373844
Lamb2	comp460348_c1	-0.281272	-0.0858324	0.0429219	-0.00039328
C3	comp463067_c3	1.97177	1.65677	0.665811	0.519979
	comp462487_c0	0.40514	1.44105	1.60159	1.14469
Kdm6b	comp462468_c18	1.54621	0.268752	0.438046	0.165451
Rbl1	comp464189_c18	1.20068	0.729783	0.569414	0.551321
23121P13Rik	comp461831_c0	0.422257	0.354044	0.554727	0.317777
Zcchc11	comp462176_c16	-0.181419	-0.265104	-0.10122	-0.108487
Tmem132c	comp456696_c2	-1.14749	-0.668356	1.16981	1.5368
Lgr6	comp463294_c16	-0.911084	-1.34837	-1.29777	-0.945618
Ncapg2	comp464764_c13	1.45472	1.03101	0.974271	0.943855
Npr2	comp463772_c17	0.0209086	0.405671	0.347883	-0.0215093
D6337F22Rik	comp464907_c13	-0.574054	-0.371757	-0.256298	-0.0825989
Sh3bp4	comp460520_c3	0.0448243	0.165112	0.354438	0.362505
Mid2	comp460245_c3	-0.115939	0.288518	0.121294	0.0818076
Kpna4	comp461018_c19	0.415891	0.057929	-0.110941	-0.218472
Igsf9b	comp457996_c3	2.30009	1.62998	1.53458	1.0706
Extl3	comp459421_c2	0.305508	0.15209	0.170329	0.122507
	comp463871_c0	0.438974	0.0409401	-0.142924	-0.254584
Wdr6	comp455377_c13	0.0662353	0.846966	1.16849	1.1551
Ebf3	comp455909_c24	-1.51265	-0.710707	-0.987154	-1.01378
Gm15455	comp462135_c11	0.317738	0.158562	0.149906	0.0584695
Lrba	comp464409_c20	0.0416464	-0.0289829	-0.214493	-0.222688
Inpp5d	comp464514_c7	2.05378	1.00462	0.763071	0.360781
Agap1	comp463967_c25	-0.0793603	-0.0273385	-0.24075	-0.285768
Kpna6	comp460378_c7	0.341314	0.0974366	0.0246944	-0.159499
Cpsf6	comp463154_c14	0.705526	0.114065	0.00456399	-0.00631169
Mical3	comp464746_c2	0.208456	0.0958688	0.0830679	-0.00733964
Pde2a	comp461569_c1	0.120318	-0.108203	-0.586487	-0.903634
Mapkbp1	comp464384_c7	0.326241	-0.184467	-0.330381	-0.264066
Slc24a3	comp459147_c11	0.153316	0.000182445	-0.247075	-0.42337
Esyt1	comp460224_c8	0.734951	0.539384	0.346465	-0.0448561
Epha1	comp455677_c1	0.333903	0.111615	-0.346947	-0.358923
Dennd1a	comp464089_c45	0.125638	0.0972455	0.255916	0.10042
Plxnb3	comp451810_c0	-1.47063	-1.89805	-1.44376	-0.968663
Tshz1	comp454085_c19	-0.632501	-0.215197	0.177281	-0.171139
Odf2	comp463515_c6	0.727526	0.535597	0.598516	0.463948
Map3k4	comp464140_c25	0.130504	-0.193361	-0.346372	-0.355499
Col4a2	comp458635_c26	0.886461	1.42623	1.36931	0.996003
Dhx16	comp461178_c20	0.83537	0.22358	0.207275	0.00166531
Lrfn4	comp462332_c5	1.0176	1.18506	1.07071	0.981283
Ankrd11	comp461673_c13	0.22011	0.0664458	0.0426807	-0.0853787
Pds5a	comp464036_c25	0.564159	0.289821	0.131009	0.185999
Map3k5	comp464483_c22	0.459487	-0.289926	-0.405566	-0.484437
Mrc2	comp464291_c22	0.559922	1.54471	1.84506	1.57348
Magi2	comp450270_c2	-1.55816	-1.73735	-0.8697	-1.36343
	comp460351_c7	-0.0182426	-0.0411741	-0.17354	-0.26799
11128C15Rik	comp461547_c3	-0.796812	-0.639811	-0.633827	-0.483086
Ptch1	comp465084_c9	-0.736449	-0.649245	0.178506	0.898639
Notch3	comp464443_c1	0.959321	0.56671	0.452847	0.212471
Slmap	comp460377_c17	0.395448	0.141392	-0.0674607	-0.0737835
Smpd3	comp463271_c18	0.0815196	0.541711	-0.199047	-0.417678
Ulk2	comp464276_c3	0.0757896	0.0799542	-0.0391379	-0.13869
Add1	comp461056_c39	0.228857	0.121157	0.0550417	-0.0551249
Iqgap1	comp464850_c25	0.60488	0.166942	-0.0857902	-0.255977
Pcdh2	comp464433_c2	-1.48302	-1.46941	-1.14107	-0.846608
Nrap	comp464758_c11	-2.41829	-2.93535	-2.42476	-3.54178
Csde1	comp462399_c23	0.0594656	-0.13245	-0.251431	-0.353379
Ror2	comp459826_c10	-0.00601333	1.42884	1.7189	1.53261
Cps1	comp430714_c1	-1.21126	-1.20285	-1.81382	-1.62414
mKIAA1997	comp465244_c6	-0.673713	-0.275484	-0.113464	-0.0782705
11118G7Rik	comp464757_c3	0.695692	0.555314	0.529896	0.372999
Trappc9	comp464703_c14	0.341861	0.189533	0.186672	0.124326
Tomm7a	comp460090_c30	0.338526	-0.00767313	-0.153567	-0.135
Phf14	comp463751_c4	0.115574	0.325687	0.384422	0.402329
Itga3	comp463926_c12	1.55435	0.148757	0.0250473	-0.0198207
Pdpr	comp459380_c1	-0.0624591	-0.245994	-0.265111	-0.253839
Tlr7	comp464724_c0	0.615373	0.876299	0.512527	0.262815
Skiv2l2	comp464414_c17	0.448092	0.19737	0.0936923	0.0779551
Ccdc18	comp464923_c5	0.232593	0.292042	0.226581	0.159142
Nr3c2	comp456616_c3	-1.74628	-1.67901	-1.638	-1.63575
Xpo4	comp464083_c8	0.726972	0.44399	0.32455	0.292662
Trim8	comp454075_c18	0.979156	0.555412	0.428374	0.2774
Sox6	comp455955_c21	-1.25817	-1.4697	-1.36975	-1.33061
Tyk2	comp464094_c24	0.387862	0.35135	0.410837	0.281787
Lrrn1	comp352172_c0	-1.43577	2.54981	3.14954	2.86545
BC6779	comp454307_c0	0.562564	-0.052506	0.0595726	-0.286047
Ap1g1	comp464739_c30	0.429826	0.121496	-0.0305919	0.0300273
Dis3l	comp462891_c18	0.228333	0.156934	0.186225	-0.00849435
Dse	comp453563_c5	1.59079	1.24477	0.962141	0.644919
Eif3c	comp459010_c1	0.661932	0.20268	0.0903262	0.0292899
Ahctf1	comp464900_c13	0.193615	-0.41743	-0.430015	-0.431966
Mcc	comp462911_c6	-0.422421	-0.252648	-0.00259537	0.0232601
Cpd	comp462934_c12	0.0421214	-0.389075	-0.608121	-0.669042
Thbs4	comp456915_c10	-0.00136825	0.746163	0.592828	-0.415252
Ndst1	comp464987_c10	0.529296	0.82637	0.884005	0.77167
Ppargc1a	comp451202_c0	-2.28778	-2.35619	-3.019	-2.76573
Dnahc1	comp450111_c7	-0.0447908	-0.493293	-1.10615	-0.428391
Nckap5l	comp462859_c15	-0.10933	0.300643	0.672534	0.446235
Ubap2l	comp464867_c14	0.209611	0.173323	0.228073	0.0827095
Mcm2	comp460226_c8	1.06151	0.446329	0.480361	0.432453
Arhgap39	comp460297_c5	-0.061268	-0.190619	0.02881	-0.0165043
Txndc11	comp463025_c21	0.51186	0.527568	0.525494	0.396071
Rnf13	comp457045_c23	-0.00469476	0.220146	0.00154978	-0.117696
Kdm1a	comp462326_c2	0.187858	0.194204	0.121561	0.0721694
Ncoa2	comp464205_c1	-0.0763703	-0.184985	-0.19856	-0.20609
Plxna3	comp462579_c1	1.42931	1.10821	1.02498	1.07714
Prkg1	comp454296_c5	-1.14107	-0.404297	-0.101651	-0.0993206
Myom1	comp462207_c1	-3.27152	-2.17054	-2.10353	-3.02895
Exoc5	comp463418_c26	0.233419	0.182753	0.0441662	0.116306
Nfatc4	comp454285_c13	-0.521691	0.606001	1.16206	0.913522
Zhx3	comp456071_c13	-0.417937	-0.522897	-0.47723	-0.640766
Plxna4	comp465184_c11	1.09167	0.994391	0.927709	0.896126
Dll1	comp455716_c8	0.455992	0.711602	0.726688	0.354655
Sema3c	comp461784_c13	-0.136263	-0.574849	-0.65515	-1.03641
Sash1	comp460511_c12	-0.425652	-0.157658	-0.119149	-0.040044
	comp463659_c17	0.28707	0.241949	0.15287	0.0845821
Smarca4	comp464330_c26	0.818259	0.603003	0.660203	0.514553
4921513D23Rik	comp464044_c40	-0.0835286	-0.140302	-0.218756	-0.176752
Rin2	comp462068_c3	0.38871	0.336154	0.270723	0.202707
Slc5a3	comp456923_c15	-0.301532	-0.336945	-0.482553	-0.549028
Chd9	comp465199_c7	-0.0550278	-0.0816101	-0.171827	-0.198934
BC223	comp461334_c16	0.082961	0.0749455	0.157831	0.0504242
Prkd2	comp463947_c14	-0.217107	-0.297728	-0.0123786	-0.211253
Stt3a	comp463501_c21	0.674803	0.472993	0.243424	0.163484
Itga2	comp455100_c3	0.724044	-0.170605	-0.594074	-0.465428
Nphp3	comp463442_c14	-0.388027	-0.109154	0.0742832	0.0380138
Cdhr1	comp457008_c1	8.2052	6.77881	6.14764	6.02706
Nlrx1	comp459710_c26	1.23889	0.613669	0.674674	0.550651
Nfatc1	comp460542_c16	-0.410576	-0.327868	-0.224016	-0.357624
Gemin4	comp466438_c0	0.952215	0.712493	0.660987	0.590269
Cdk12	comp461357_c19	0.264225	-0.0143508	-0.0530906	-0.175609
Inpp5a	comp461794_c29	-0.363634	-0.366411	-0.427007	-0.46877
Galnt3	comp457606_c5	0.428449	-0.29332	-0.508114	-0.467319
Epas1	comp461409_c16	-0.0491925	-0.175528	-0.687767	-0.970938
Zfp516	comp464550_c30	0.241377	0.358497	0.442895	0.379086
Atp11b	comp464433_c11	0.955367	0.245115	0.0304023	-0.0673439
Clcn5	comp463793_c31	0.61578	0.817177	0.751827	0.382025
Gpr64	comp460128_c17	-0.376791	1.14885	1.72958	1.47992
Mllt6	comp462114_c3	-0.347422	-0.257405	-0.103003	-0.270933
Ncoa1	comp464534_c14	-0.176166	-0.132473	0.0804974	0.0438738
	comp455850_c0	-0.30004	1.32903	1.30649	1.08816
Wdr17	comp459933_c0	-0.504704	-0.66113	-0.802973	-0.78907
Pomt2	comp463162_c18	-0.202091	0.0475133	0.248709	0.150868
Slitrk6	comp409661_c0	-0.147602	-0.295367	-0.509453	-0.257073
Xpr1	comp463386_c14	0.671056	0.470322	0.404874	0.279127
131F3Rik	comp464321_c29	-0.160391	-0.640864	-0.689807	-0.889498
Znrf3	comp455685_c5	-0.205481	-0.200226	-0.106593	0.0728235
Slc4a3	comp461340_c0	-1.47189	-0.886004	-0.398995	-0.76835
Ptprv	comp464322_c24	0.189721	0.604414	0.865229	1.14345
Prdm1	comp455503_c19	0.169388	0.360662	-0.344602	-0.193015
Ikzf2	comp462065_c19	-0.406978	-0.377404	-0.309332	-0.760471
Prdm4	comp461176_c8	0.67303	0.449799	0.240879	0.209358
Atxn1	comp462721_c3	0.442898	0.418627	0.305234	0.0854711
Cdh6	comp457740_c19	0.687371	1.11146	1.06064	1.05721
Flrt3	comp462076_c2	0.281828	-0.213375	-0.218371	-0.201865
Odz4	comp464210_c13	0.567874	0.348314	0.375915	0.383717
Mfn2	comp463328_c26	-0.681987	-0.995165	-1.04204	-1.24684
Zfhx3	comp452846_c5	-0.737536	-0.10163	0.533946	0.0611788
Ccdc8	comp457517_c23	-0.783139	0.371138	0.361184	-0.0299198
Sec23a	comp463660_c1	-0.0839413	0.377073	0.305921	0.317444
Taf5	comp452822_c0	0.53779	0.024939	-0.167267	-0.0894467
Camsap1l1	comp464356_c19	0.0266601	-0.16241	-0.176609	-0.241926
Prpf4b	comp463795_c8	-0.891927	-0.735203	-0.281552	-0.422791
Ptpru	comp459612_c7	-1.07636	-0.700589	-0.864529	-1.24403
Wfs1	comp455168_c1	-0.972938	-0.6871	-0.774792	-1.20058
Usp13	comp463930_c17	-1.06776	-0.880728	-0.76296	-1.28271
Lrp6	comp463276_c10	-0.194262	-0.264398	-0.327959	-0.30579
Stim2	comp458990_c3	0.0921151	-0.162295	-0.269632	-0.344939
Sipa1	comp461024_c7	1.41816	1.01693	1.15556	0.743375
Tada2b	comp422889_c5	0.246819	-0.101136	-0.00444631	-0.263769
Mcm6	comp462842_c11	1.12161	0.665211	0.567359	0.621475
Foxp4	comp461892_c0	0.4058	0.308746	0.337811	0.115065
	comp452537_c1	0.079415	0.168559	0.296748	0.0552671
Ect2	comp464406_c17	1.59607	0.761036	0.829058	0.806215
Sbno1	comp465161_c23	0.347017	0.080822	0.00607018	-0.036959
Itpr3	comp458875_c0	0.0267583	-0.29529	-0.385918	-0.432613
Slc9a1	comp464273_c1	0.488541	0.256086	0.17495	-0.00399474
Rps6ka3	comp462853_c5	0.493472	0.265329	0.149245	-0.115419
Fbxl5	comp454844_c18	0.997897	0.585503	0.427457	0.361149
Abcf2	comp458727_c5	0.693151	0.330182	0.241438	0.189843
Tab2	comp454997_c20	0.104079	-0.0689915	0.092092	0.0394971
Nr2c2	comp461810_c42	-0.222062	-0.160273	-0.236325	-0.154586
Angel1	comp458403_c4	-0.0673795	0.41415	0.523689	0.434082
Numa1	comp464991_c16	-0.00164367	0.0305628	0.156186	0.0170947
Dennd4b	comp461918_c5	0.544566	0.146578	0.122922	-0.646901
Kifap3	comp464145_c1	-0.143363	0.0661631	0.0499724	0.0510392
Arhgap21	comp458761_c5	0.113363	-0.286911	-0.350415	-0.488272
Sema4d	comp463705_c7	0.515149	0.487808	0.177707	0.0957966
Adam19	comp463886_c4	1.73875	1.68152	1.40367	1.0715
Kdm5c	comp464118_c3	0.476689	0.359562	0.282676	0.245755
Bcar1	comp453461_c5	0.504417	0.540872	0.476658	0.0841966
Nlgn2	comp461126_c10	-0.154404	1.05548	1.64488	1.31982
Frmpd1	comp463351_c2	0.0300229	0.451092	-0.110652	-0.140596
Atp2c2	comp464006_c13	1.21707	0.499697	-0.0687695	0.00365134
Rnf139	comp456588_c26	-0.103166	-0.283183	-0.511474	-0.498793
C3327C9Rik	comp463605_c1	1.2141	0.955236	0.786742	0.875181
Nacc1	comp462900_c5	1.21092	0.618503	0.353187	0.152872
Pak6	comp460689_c6	1.10181	0.34094	0.0850738	0.154762
Med12	comp464768_c9	-0.0564949	-0.304597	-0.182708	-0.207911
Ttbk2	comp463932_c24	-0.263402	0.0718651	0.219687	0.0102387
Ptgfrn	comp457090_c24	1.11485	1.42459	1.63884	1.40126
Rab14	comp453949_c33	0.361975	0.142568	0.0769782	0.00730699
Lrrc16b	comp458769_c4	-0.585945	-0.379252	-0.432948	-0.53432
	comp463448_c6	0.357316	0.190195	0.116742	0.019319
Smg7	comp464348_c2	0.143108	-0.227014	-0.24761	-0.34696
Flii	comp457113_c1	0.658628	0.344182	0.149071	-0.132891
Tenc1	comp462767_c1	-1.16842	-1.01907	-0.809069	-0.995294
Col4a1	comp463075_c11	1.04327	1.30463	1.24581	0.862534
Gtf3c4	comp453591_c11	0.436898	0.285052	0.322248	0.367534
Taok2	comp462677_c2	0.404061	0.294479	0.509897	0.308832
Tgfbrap1	comp460848_c7	0.600892	0.234145	0.169154	0.0452847
131I1Rik	comp463489_c5	0.640327	0.131437	-0.0113179	-0.201562
Kcnb1	comp446940_c1	-1.1662	-0.547754	0.527291	1.0122
Plxnd1	comp463202_c17	0.153535	0.320468	0.306861	0.121326
Abcb6	comp460703_c1	0.573315	0.135113	0.110537	0.0559723
Sh3tc1	comp462664_c14	1.3182	1.14493	0.750462	0.405925
Ano6	comp464732_c12	0.152624	-0.154155	-0.253752	-0.413087
Trappc8	comp464890_c7	0.39689	-0.0238931	-0.284133	-0.257551
Rimbp2	comp458193_c18	-1.45902	-1.04771	-0.85213	-1.21154
Fxr2	comp464388_c8	0.0739285	-0.140051	-0.165949	-0.297062
	comp463297_c34	-0.652417	-0.32488	-0.0884728	-0.0541304
Camsap1	comp462969_c6	0.183227	0.447814	0.492529	0.357124
Rprd2	comp461437_c15	0.0438768	-0.0176626	-0.039692	-0.138496
Nfrkb	comp465036_c17	0.209032	-0.0526937	-0.00966434	-0.000279295
Abl1	comp458285_c18	0.626951	0.194386	0.275414	0.129677
Pkp4	comp463746_c10	0.549252	-0.261176	-0.300772	-0.342942
Zfyve1	comp461085_c17	0.364216	0.388133	0.358177	0.314081
Zer1	comp462876_c4	-0.444937	-0.291198	-0.050211	-0.136488
Zfyve2	comp460445_c27	0.26378	0.234258	0.0214577	-0.0728569
Ambra1	comp463618_c24	0.295706	0.0650736	0.044738	0.0324943
Slco5a1	comp453551_c5	-1.17205	0.626019	0.521081	0.344201
Hnrnpk	comp464829_c13	0.342121	0.138053	0.0848391	0.0457759
E2f3	comp459026_c9	1.21682	0.875389	0.905684	0.806349
Grk5	comp461033_c10	-0.925199	-0.709966	-0.561233	-0.844134
Dhx15	comp459928_c2	0.178798	-0.0212178	-0.168328	-0.139459
Bcor	comp461745_c6	-0.02603	-0.106191	-0.181697	-0.188568
Phf17	comp460862_c7	-0.338697	-0.418047	-0.464621	-0.663209
Xpo6	comp464282_c9	0.84654	0.493724	0.461871	0.390542
Spata5	comp462825_c24	0.0017995	-0.0626275	-0.18089	-0.0641043
C2381A13Rik	comp452758_c18	0.210671	0.38097	0.258638	0.043918
Chuk	comp463690_c6	0.370994	0.0503988	-0.0783633	-0.0725145
Atxn7l2	comp454665_c0	-0.188934	-0.201962	-0.0196993	-0.100529
Thbs3	comp461384_c4	-1.10904	0.650105	0.800509	0.130019
Herc3	comp464230_c15	0.3883	-0.246083	-0.475474	-0.633768
Mthfd1	comp463556_c25	0.413944	0.0336221	-0.152722	-0.0728648
Abtb2	comp461923_c16	-0.274392	-0.887641	-0.79663	-0.786401
Sin3a	comp461676_c28	0.055609	-0.0778032	0.142052	-0.0336848
Pdzd2	comp460559_c3	-0.63074	-0.541564	-0.673922	-0.389572
Sncaip	comp452083_c9	-1.97449	-0.791184	0.525866	0.478643
Arnt2	comp453405_c1	-0.305281	-0.0713197	0.673441	0.541456
Agbl1	comp456329_c14	-1.84447	-2.63116	-2.50725	-3.3199
Lrrc4	comp452964_c13	1.33413	1.88623	1.91657	1.91439
AI8481	comp463859_c14	0.334721	-0.0493694	-0.113003	-0.031364
Edc4	comp459530_c7	0.180948	0.108616	0.0860413	0.00347147
Polr2a	comp464239_c1	0.654111	0.289183	0.336141	0.304215
Pcif1	comp461982_c9	0.219161	-0.0135544	-0.0427806	-0.122488
Lrrtm1	comp450674_c0	0.940596	3.37534	3.53965	3.28341
Pgap1	comp463664_c26	-0.469741	-0.52489	-0.707863	-0.643689
	comp456996_c3	0.0605392	0.385603	0.967007	0.669936
Clcn3	comp462619_c8	0.0894395	-0.33231	-0.546921	-0.48044
Lyst	comp463108_c18	0.426807	-0.00847284	-0.162366	-0.242977
Zfpm1	comp455812_c8	0.498515	0.55878	0.309356	0.151843
Slc9a6	comp462966_c9	0.635478	-0.0058804	-0.0488577	-0.0365933
Pcnx	comp464592_c20	0.495768	-0.00374882	0.123611	0.066661
Aldh1l1	comp445522_c0	-2.73131	-3.06978	-2.86593	-3.17218
Sipa1l2	comp464591_c16	0.835864	0.341952	0.176275	0.244374
1192N15Rik	comp454733_c42	-0.337611	-0.503916	-0.349619	-0.417714
Nid1	comp462582_c13	-0.228468	0.310658	0.283872	0.00409909
Nedd9	comp456742_c3	0.457093	-0.102958	0.140044	0.0195334
Tmtc2	comp458379_c7	-0.518174	-0.338464	0.387293	0.606826
Lpin1	comp464270_c28	0.156874	0.0130528	-0.160257	-0.214993
Fem1c	comp461339_c18	0.407815	0.294437	0.155307	0.0755392
Bzrap1	comp456816_c12	-0.862309	-0.129572	0.727608	0.904735
Hspa5	comp452187_c16	1.49482	1.18522	0.88017	0.67567
Rtf1	comp465105_c6	0.0257362	-0.184919	0.131253	0.0587936
Kdm1b	comp463096_c20	0.148242	-0.169171	-0.315833	-0.144068
Zfp385a	comp457118_c7	0.599573	0.257582	0.25525	-0.00698625
Fam98a	comp463498_c24	0.245894	0.290057	0.313946	0.119773
Spg11	comp464465_c17	0.0165086	-0.0609902	-0.0112171	0.0248615
Ampd2	comp461531_c2	0.499296	0.288932	0.374567	0.256155
Ninl	comp463983_c5	-0.913764	-1.02648	-0.79885	-0.644019
Ggt7	comp452599_c6	0.432412	0.684529	0.925195	0.848249
Slc12a9	comp463750_c12	-0.21399	0.12859	0.0860425	-0.120023
Pum1	comp463844_c13	0.132903	0.094169	0.0904649	0.0538129
Cacna1c	comp459611_c10	-0.513913	0.939266	1.18442	1.27197
Zfp219	comp464080_c5	0.0328925	-0.326171	-0.175706	-0.270033
Hectd3	comp461645_c1	0.538707	0.355182	0.274712	0.0513411
Exoc6b	comp464206_c1	0.420606	0.323451	0.362877	0.19903
Tox	comp452837_c27	-0.450451	-0.0662961	0.020344	0.112123
Col5a3	comp464142_c5	0.916487	2.45779	2.21762	1.66501
Uba1	comp462084_c13	1.03197	0.618052	0.447876	0.332238
Smurf2	comp464317_c16	0.376028	0.13435	0.00952248	-0.0434438
Vps41	comp464278_c14	0.229451	0.213227	0.117945	0.122013
Xab2	comp461322_c2	0.170867	-0.00496127	-0.0169681	0.0041936
Zfp654	comp459702_c28	-0.214496	-0.435524	-0.398672	-0.391648
Kank1	comp459851_c17	-0.450813	-0.866049	-1.00112	-1.16656
Rrm1	comp462379_c8	1.00412	0.245141	0.159342	0.118862
Tnpo2	comp463055_c10	0.405431	0.325151	0.285559	0.156674
Adam11	comp460763_c10	-0.964417	-0.83109	-0.735627	-0.498697
Fam171a2	comp453335_c3	0.915469	2.23349	2.45811	2.05533
Heatr5a	comp462965_c19	0.561073	0.748661	0.576247	0.369433
Agtpbp1	comp463299_c26	-0.079629	-0.133379	-0.158726	-0.253931
99321J3Rik	comp464905_c0	-0.358375	-0.496207	-0.302586	-0.395065
Grik5	comp460675_c4	-1.15949	-0.43089	0.368988	0.197246
Tjp2	comp463190_c10	0.853291	-0.030506	-0.225473	-0.318321
Bnc1	comp457242_c29	2.74243	1.2545	1.08521	1.23477
Ace2	comp458527_c21	2.06266	2.14741	1.81433	2.0862
Zmynd8	comp464738_c17	0.406918	0.494815	0.329609	0.288541
Tab3	comp458364_c17	-0.0121553	-0.483221	-0.620862	-0.492835
Acsl4	comp463103_c20	0.0235395	-0.721669	-0.90418	-1.00411
Ephb4	comp462424_c10	0.222708	0.436033	0.651978	0.500509
Gria3	comp450104_c4	-2.53838	-1.49636	0.426645	0.759877
Fam59a	comp457185_c40	0.122478	0.344753	0.423467	0.480761
Galnt1	comp462868_c29	1.2156	0.755156	0.419292	0.235916
Dyrk1b	comp460414_c1	-0.773045	-0.597814	-0.321749	-0.501218
Tyro3	comp460963_c18	-0.0849748	0.118948	-0.121217	-0.223911
Slc33a1	comp457725_c24	0.261599	0.0636629	-0.266647	-0.22626
Pygl	comp461691_c1	0.47349	-0.148353	-0.26393	-0.355595
Pygm	comp460194_c22	-3.03662	-2.91577	-2.99533	-3.7014
Tril	comp457291_c27	0.403625	1.30654	1.45413	0.863427
Rps6ka2	comp463355_c4	-0.144809	0.10127	0.0226812	-0.144796
Clstn1	comp460259_c14	-0.0492661	0.0700991	0.184177	0.185625
Btbd1	comp457657_c2	0.214452	-0.0164843	-0.0788893	-0.0134318
Sec23ip	comp463396_c21	0.409452	0.459658	0.477632	0.376594
Postn	comp464783_c14	-0.75083	0.447365	0.508637	0.580941
Rlf	comp456189_c16	0.431635	-0.170409	-0.171363	-0.222615
Sp2	comp460204_c1	-0.130146	-0.430818	-0.340953	-0.588433
643527G18Rik	comp451767_c5	0.238117	0.210956	0.139222	-0.126771
Tbc1d23	comp463020_c12	-0.123953	0.0416334	0.00825253	-0.151768
Fam171a1	comp458604_c28	-0.361237	0.0705117	0.366107	0.341196
643598A4Rik	comp450884_c4	-1.2116	-0.791088	-0.696813	-0.692829
Trip12	comp464707_c11	0.222162	0.238437	-0.0433372	-0.0496665
Bend3	comp450853_c15	1.56111	1.36444	1.33433	1.07189
Flrt2	comp457687_c18	0.16002	1.4877	1.68931	1.61133
Smurf1	comp462467_c0	0.404129	0.22669	0.143132	-0.0447656
Trpc4ap	comp461629_c29	0.562041	0.482145	0.517991	0.30827
Rspry1	comp462163_c20	0.162621	0.296152	0.256349	0.236996
Tbl1xr1	comp463371_c13	0.44579	0.0654397	0.0228186	-0.0605393
Erbb2ip	comp464669_c1	-0.135133	-0.0801443	-0.0974103	-0.143411
Ube4a	comp463996_c4	0.22048	0.0216077	-0.104368	-0.157248
Foxo3	comp456253_c20	-0.123274	-0.12984	-0.253948	-0.446522
	comp452727_c37	-0.381707	-0.661297	-0.857587	-1.15189
Pum2	comp462685_c28	-0.0122795	-0.0845646	-0.0615977	-0.113693
Frmd4b	comp462254_c9	-0.532901	-0.765681	-1.08479	-1.07058
Trim28	comp457627_c0	1.2593	0.952161	0.883029	0.868655
Rap2c	comp426350_c4	0.710272	0.749479	0.54857	0.411957
	comp457347_c26	0.24025	-0.00152904	0.0466355	0.178255
Casd1	comp462713_c16	-0.057679	-0.0513858	-0.122717	-0.00245362
Erc1	comp463686_c33	-0.0599186	0.0304952	0.0824527	-0.0852879
Mthfd1l	comp463314_c11	2.2661	1.8225	1.90297	1.77893
Mast2	comp458584_c2	0.0353179	0.177255	0.212916	-0.0479822
Acan	comp461890_c11	-0.981071	-0.745749	-0.763079	-1.06137
Osbpl7	comp458026_c2	-0.115721	0.0696097	0.484369	0.345912
Slitrk2	comp451092_c10	-0.997836	-0.438133	-0.619827	-0.94937
Arhgef26	comp456964_c1	-0.745525	-1.13403	-1.01301	-0.956884
Efnb1	comp459978_c3	0.785685	0.800762	0.802496	0.741048
Acsl3	comp461619_c25	0.24642	0.312351	0.168126	0.123968
Phex	comp455093_c6	-0.316864	-0.833495	-0.384419	-0.13288
Bahd1	comp455872_c4	0.404308	0.526959	0.584874	0.347895
Katnb1	comp458200_c7	0.641073	0.465168	0.457199	0.341868
Med16	comp461722_c5	0.737475	0.375104	0.342474	0.174579
Pdzrn3	comp453721_c14	-0.118095	0.569965	0.763567	0.652456
F13a1	comp461017_c19	-0.544017	-0.72638	-0.900687	-1.22964
Map3k12	comp452154_c14	-0.0963715	0.423942	0.53969	0.318487
Snrk	comp463397_c14	-0.0280132	0.00436225	-0.0412737	-0.104665
Exoc3	comp461225_c15	0.115299	0.0289336	0.0153583	-0.207248
Ar	comp458396_c19	-0.901439	-1.04445	-1.14676	-1.06803
Wdr24	comp452576_c0	0.410461	0.152254	0.0729834	0.00446435
Zfp47	comp460752_c27	0.353969	0.172865	0.15766	-0.0216763
Hadha	comp459733_c10	0.273065	-0.174139	-0.488254	-0.607722
Parp1	comp463704_c20	0.360564	0.43465	0.561555	0.281504
Cyp26b1	comp451671_c19	-0.352322	-0.430248	-0.554335	-0.318989
Rasal2	comp462697_c29	0.267626	0.116887	0.235305	0.0610603
Tubgcp3	comp463881_c9	0.543542	0.32507	0.288048	0.249727
Brd7	comp464165_c2	0.257979	0.0393178	-0.0191281	-0.0618836
Ophn1	comp464585_c8	-0.441648	-0.357391	-0.269745	-0.194858
Gpr133	comp464351_c21	0.828074	2.30095	1.84715	1.19699
Spata13	comp461503_c1	1.6945	0.225401	0.330583	0.117524
Pde5a	comp460551_c4	0.222167	0.155465	0.0842651	-0.0502567
Tjp1	comp464449_c23	-0.117307	-0.224565	-0.288293	-0.317318
Man1a	comp461041_c27	0.537742	0.854803	0.510074	0.293708
Wdr26	comp460796_c5	0.403246	0.265137	-0.0137659	0.00147683
Itga1	comp460279_c8	0.110619	0.46585	0.613038	0.484036
Adamts5	comp457160_c18	-0.809048	0.31431	-0.344343	-0.800777
Dido1	comp455772_c9	0.341972	0.121114	0.156822	0.0474644
Tfip11	comp458555_c2	0.755031	0.38797	0.255381	0.311771
	comp461113_c4	1.55528	1.25724	0.914433	0.618939
Aco2	comp452719_c27	-0.652493	-0.885337	-0.991889	-1.2945
Afg3l2	comp462998_c5	0.500491	0.166901	0.168974	-0.00607842
Pbx1	comp458411_c23	0.659376	0.553903	0.616668	0.380007
Dennd5b	comp462498_c18	-0.561934	0.251446	0.526283	0.249228
Msl1	comp462829_c5	0.285116	0.167825	0.20836	0.143575
	comp462665_c17	-1.59751	-1.52303	-1.3847	-1.22045
Lrrc8d	comp457520_c2	0.788756	0.452338	0.393554	0.226366
Adamts4	comp457270_c23	1.135	2.21956	1.9728	1.68995
Arhgap6	comp451342_c6	0.0473425	0.0953911	0.00168848	-0.478976
	comp450381_c2	-1.21223	-0.167186	-0.409036	-1.02448
Ltbp4	comp460386_c4	-1.62429	-1.55686	-1.47521	-1.46135
	comp455572_c5	-0.101445	0.452796	0.512076	0.267284
Map3k6	comp463880_c21	0.61331	0.348223	0.136478	0.162054
Sec23b	comp462789_c14	1.2658	0.528196	0.284898	0.28608
Ncoa3	comp462753_c11	0.455162	0.0147124	-0.16372	-0.295994
Lrp8	comp463036_c8	1.02971	0.882115	0.778157	0.806123
Tiam1	comp464842_c9	0.485711	-0.0791875	-0.397342	-0.431386
	comp463130_c20	0.0674645	0.659319	0.543936	0.411596
Tek	comp462186_c11	-0.491481	0.568467	0.358627	-0.704625
Sv2b	comp449905_c4	0.100139	0.558777	0.902282	1.1119
C2cd2l	comp456583_c13	1.02557	0.373881	0.499092	0.212613
Mgat2	comp448497_c0	1.25687	1.01007	0.901477	0.682317
Fam83h	comp457977_c43	0.71133	0.149352	-0.0582893	0.0766353
Etf1	comp458810_c24	0.811757	0.211407	-0.0854309	-0.110064
91311E15Rik	comp464519_c14	0.431936	0.273108	0.337347	0.243951
Kcna6	comp450164_c4	-0.572559	-0.400399	-0.468847	-1.37407
Map3k14	comp461584_c11	0.539102	0.635728	0.691293	0.325275
Pabpc1	comp456026_c9	0.754841	0.158937	0.244221	0.00103697
Cnnm4	comp458202_c12	0.334194	0.451381	0.100096	-0.0561115
Kif11	comp463312_c2	1.89811	1.22798	1.13996	1.16199
Zzef1	comp465183_c0	0.409506	0.249372	0.196535	0.104531
Synrg	comp463992_c24	0.110974	-0.0825972	-0.184373	-0.294426
Aco1	comp463362_c30	0.154943	-0.216013	-0.34015	-0.503441
Atl1	comp458694_c18	-0.6804	-0.0481853	-0.0416329	0.072463
Ppp2r2d	comp458162_c28	0.376089	-0.058054	-0.147081	-0.0880556
St14	comp462491_c4	0.250256	-0.299032	-0.618857	-0.48242
Ep3	comp463652_c6	0.456377	0.114922	0.0414505	0.0186157
Hnrnpul2	comp459226_c18	0.614327	0.415253	0.445787	0.279387
	comp463194_c20	-0.930453	-0.915087	-1.01355	-1.2301
4269	comp464638_c13	0.0389755	-0.203289	-0.305217	-0.353081
Abcd2	comp456704_c6	-2.46457	-2.82283	-3.07753	-3.24324
Rap1gap	comp462536_c0	-0.0545294	-0.15795	-0.11929	-0.0147392
Fut8	comp460814_c12	-0.388864	0.148771	0.167019	0.00459495
Nek9	comp463221_c21	0.34291	0.384043	0.385725	0.325938
Loxl2	comp462072_c18	-0.00807667	1.25926	1.40637	1.43656
Lgr4	comp460708_c28	-0.812589	-0.909707	-0.902986	-0.646798
Ercc6l	comp456819_c12	0.665699	0.0162321	0.0587015	0.208522
Myo1b	comp464553_c1	0.277113	0.484982	0.379502	0.201929
Psme4	comp464714_c13	0.294722	0.218823	0.0232872	0.0128002
Hspd1	comp460969_c20	0.986934	0.0906294	-0.0556519	-0.212246
Itgb8	comp462051_c21	-0.54161	-0.844717	-0.812908	-0.61413
Jhdm1d	comp464648_c32	0.578106	-0.0686318	-0.383021	-0.340229
Ncor1	comp463874_c9	-0.00384838	-0.171631	-0.221571	-0.273316
Cog7	comp463334_c8	0.195915	0.149336	0.142209	0.0797765
Eef2	comp461644_c12	0.634362	0.48205	0.536076	0.377039
Ddx42	comp462912_c22	0.0732753	-0.0499057	-0.0817571	-0.0978916
Gpc1	comp458964_c24	-0.0579319	0.19575	-0.00995079	-0.477633
Epha3	comp463633_c16	0.127391	0.121357	0.566204	0.397275
Ccdc21	comp461040_c9	0.246225	0.132174	0.247389	0.0558254
Hmgcr	comp462864_c8	0.851294	0.601013	0.279437	0.399062
Frmd4a	comp463372_c36	0.095149	0.279977	0.373744	0.299165
Atp13a5	comp464286_c14	-0.3527	0.182303	-0.0193686	-0.0275969
Hdlbp	comp461650_c6	0.622417	0.738993	0.728193	0.493113
Npc1	comp462928_c10	0.689462	0.470898	0.344004	0.57944
Rnpepl1	comp453877_c0	0.12163	-0.278727	-0.3141	-0.53418
Tnfaip3	comp455523_c12	2.33964	0.231553	-0.0592952	0.000424843
Jup	comp462736_c23	0.944932	0.468436	0.193391	0.16083
Rps6ka4	comp459274_c8	1.6742	1.24446	0.921017	0.880693
Fam184a	comp459750_c5	-0.527743	-0.631092	-0.585691	-0.442611
Sgsm3	comp461356_c3	1.01685	0.645618	0.534799	0.439143
Dock1	comp465125_c18	-0.06031	0.3301	0.340265	0.218152
Vps54	comp462453_c20	0.0485587	-0.140636	-0.358118	-0.485759
Heatr1	comp464749_c0	0.768319	0.281968	0.122834	0.233748
Ggnbp2	comp462297_c7	0.169885	0.0891633	-0.0250538	-0.0130268
Psmd2	comp458579_c1	1.31745	0.906164	0.744704	0.554336
Brpf3	comp458377_c8	0.319993	0.205888	0.370421	0.205482
Epc1	comp464613_c14	-0.321305	-0.345137	-0.347851	-0.344278
Flrt1	comp471674_c0	-0.522603	-0.921291	-0.733577	-0.845219
Zswim4	comp463923_c24	0.670638	0.532306	0.388881	0.304121
Pik3cb	comp464290_c12	0.0994806	-0.0568921	-0.518838	-0.403326
Tnrc6c	comp459190_c0	-0.251174	-0.171122	0.0340502	0.0357772
Gatad2a	comp461115_c7	0.738643	0.413105	0.269225	0.121537
Rhbdf2	comp461936_c19	0.916961	0.0438152	-0.388858	-0.465766
Pdgfrb	comp463739_c4	0.223819	0.886299	1.01093	0.888896
Tacc2	comp464678_c12	-0.856576	-0.913533	-1.16276	-1.23298
Atg7	comp462033_c18	0.315379	-0.0275546	-0.137697	-0.0594055
Thoc1	comp461418_c10	-0.197622	-0.33713	-0.386942	-0.458593
Zfp646	comp450895_c0	0.256339	0.108933	0.167669	-0.0431292
Myrip	comp457952_c9	-1.37958	-1.15431	-1.71131	-1.63596
Mtss1l	comp456100_c6	-0.678832	-0.20014	0.114417	-0.189278
Rgl1	comp463424_c22	-0.022655	0.232599	0.35461	0.178917
Fig4	comp463576_c11	0.229905	0.386479	0.140024	0.106835
Kif3a	comp462681_c8	0.0428754	0.0991104	0.052211	0.107689
Ltbp3	comp454089_c1	-0.63433	0.134415	0.648442	0.458836
Hnrnpf	comp454931_c12	0.973306	0.452417	0.227439	0.18447
Urgcp	comp456633_c17	0.0340493	0.0979229	0.122969	-0.147749
Nod1	comp460988_c9	0.0580129	-0.00616216	-0.347536	-0.38254
Snx19	comp459536_c34	0.343531	0.30967	0.209216	0.079271
Fbln5	comp455926_c32	0.204609	0.714212	0.890853	0.824648
Cacna2d3	comp459548_c0	-1.66633	3.11176	3.8069	3.80211
Tle4	comp464605_c18	0.131611	0.236167	0.120777	0.0231674
Mertk	comp464342_c4	0.342331	-0.610162	-0.487702	-0.496044
Wbp7	comp464543_c5	0.792161	0.509831	0.664989	0.424164
Wdfy4	comp464792_c14	2.52198	1.91465	1.5199	0.858273
Tnpo1	comp464307_c6	0.784589	0.473654	0.323732	0.288177
Fam38b	comp464704_c31	-1.07139	-0.0416579	-0.0684119	-0.103193
Myo1c	comp460783_c25	0.555434	0.452566	0.341976	0.121339
Zbtb1	comp453064_c4	-0.0452973	-0.0970447	-0.137648	-0.268558
Dlgap4	comp462345_c21	-0.022537	0.0260466	0.198706	-0.0766048
Mmp14	comp458218_c2	0.79664	1.8676	2.06128	1.78896
Prkrir	comp455394_c15	-0.124468	-0.429348	-0.449869	-0.469017
Acvr1	comp461243_c23	0.213603	0.731982	0.602061	0.540117
Ppp3ca	comp462765_c5	-0.243617	-0.201642	-0.312449	-0.46833
Pcsk7	comp464279_c5	0.194913	0.22943	0.0743207	-0.0231237
	comp464447_c13	0.0764497	0.205758	0.149488	0.110858
Gtf3c1	comp464271_c15	0.358371	0.290506	0.226216	0.191753
Ptprm	comp464672_c5	-0.783058	0.0770689	0.189333	0.0311501
Sema3g	comp458993_c5	0.402059	-0.413395	-0.227252	0.0167017
Fam16b2	comp461161_c18	0.422855	0.22	0.0361928	0.0650986
Pdcd6ip	comp462938_c6	0.371465	0.161628	-0.0236031	-0.124409
Itgb5	comp463735_c39	0.223682	1.02631	1.21344	1.02035
Lig3	comp462821_c19	-0.00838197	-0.0586901	-0.0295564	-0.067168
Dpysl2	comp461898_c34	-0.264473	-0.0636195	-0.0352828	-0.128048
Cnot1	comp465213_c9	0.0766042	0.00604953	0.0796786	0.0381404
Gmps	comp462562_c16	0.450745	0.143931	-0.0380202	-0.0081996
Ston2	comp455091_c22	0.678528	0.146706	-0.206235	-0.435935
Usp49	comp451661_c10	-0.547367	-0.308279	-0.216245	-0.0703359
Chsy1	comp450994_c1	1.13056	1.62172	1.67097	1.31651
Ulk4	comp451103_c3	-0.75452	-0.629313	-0.39602	-0.459047
Pfkl	comp463539_c2	1.08937	0.364397	0.365533	0.166902
Lgr5	comp457137_c2	0.0925855	-0.471672	0.410957	0.382703
Spen	comp460322_c19	0.203287	-0.19775	-0.169868	-0.289884
Tlr13	comp444513_c0	3.14913	1.83677	1.23754	0.908463
Mogs	comp449838_c0	0.720157	0.44452	0.51417	0.333269
Slco3a1	comp463477_c20	-0.685629	-0.391533	-0.486628	-0.488731
Pgm2l1	comp460419_c5	-0.283761	0.113409	0.190901	0.129702
Arhgap42	comp464309_c7	-0.403598	0.143513	0.172288	0.0188233
Mvp	comp459153_c9	1.07482	0.793485	0.532593	0.33896
	comp463444_c4	-0.594912	0.020355	-0.23893	-0.58741
Dip2c	comp464992_c19	-0.013357	0.181241	0.22229	0.107657
24189E3Rik	comp462776_c13	-0.234491	0.191944	0.351342	0.335983
Klf4	comp449887_c7	-0.095148	-0.286152	-0.719648	-0.631967
Pik3c2a	comp464455_c17	0.0724511	0.167791	-0.166338	-0.310239
Scap	comp463256_c10	0.178683	-0.0692704	-0.0105531	-0.0333913
Sart1	comp463720_c12	0.696906	0.34758	0.283406	0.00266063
Tbc1d2	comp461442_c13	1.75118	0.582114	0.0491899	-0.0682029
Ctr9	comp463404_c17	0.0358656	-0.0351802	-0.103415	-0.127333
Prpf4a	comp463990_c9	0.391079	0.0341894	-0.0776102	-0.129649
Sort1	comp464533_c23	-0.335704	-0.260811	-0.219124	-0.113083
Usp21	comp454643_c3	0.167495	0.208772	0.438878	0.129424
Gpatch8	comp460495_c4	-0.0725332	-0.0448378	-0.00747281	-0.0930483
Cpt1a	comp463663_c13	1.27353	0.0906403	-0.0425704	-0.191935
Stat5b	comp464609_c5	0.801105	0.541937	0.348087	0.160857
Ap3m1	comp454148_c10	0.146744	-0.103189	-0.186858	-0.223271
Hnrnpul1	comp460885_c12	0.374425	0.142847	0.159738	-0.0236415
Fzd7	comp463976_c2	0.0424529	0.640388	0.83436	0.645179
Zfand5	comp458847_c12	0.273169	0.133514	0.0990965	0.273533
Itgb1	comp462745_c30	1.1824	1.57829	1.36632	1.08107
Usp54	comp464521_c4	0.0313894	-0.312261	-0.467901	-0.441122
Kif2a	comp451023_c1	2.40113	1.54934	1.45048	1.43139
Sh2d3c	comp458856_c11	0.0747922	0.198561	0.123192	-0.459368
Zfp367	comp451644_c20	-0.884281	-1.17029	-1.11562	-1.42987
Fbxl19	comp462863_c19	0.660643	0.491847	0.451073	0.302444
Wdr37	comp461807_c16	0.383382	0.30402	0.345595	0.159088
St5	comp463271_c25	0.139529	0.510396	0.622573	0.360986
Stat3	comp463309_c3	1.24459	0.83	0.594255	0.416346
Srgap3	comp462018_c3	-0.868989	-0.43215	-0.223999	-0.15419
Tnrc6a	comp460016_c4	-0.13665	-0.100467	0.197058	0.0150562
Zranb3	comp462155_c9	0.166848	-0.192166	-0.0559908	-0.0108775
Aldh18a1	comp462410_c19	1.28655	1.77389	1.73326	1.55166
Zbtb37	comp454348_c21	-0.575472	-0.500905	-0.256664	-0.412674
Ace	comp451161_c4	-1.66651	-1.576	-1.63795	-1.80785
Sec24d	comp463192_c17	0.757792	1.16255	1.23397	1.10438
Iqsec1	comp461760_c0	0.74481	0.0485551	-0.163064	-0.359403
Ripk4	comp456365_c22	0.786491	-0.090161	-0.36388	-0.208734
Fam193a	comp455039_c12	0.136151	-0.0216898	0.0812958	0.00162275
	comp464366_c13	-0.775944	-0.808549	-1.2562	-1.15742
Mcm8	comp462006_c3	0.810497	0.333464	0.141683	0.274303
Btk	comp460285_c0	1.70389	0.966184	0.673461	0.343363
Appl1	comp463699_c19	-0.0353747	-0.0757431	-0.21918	-0.141282
	comp460521_c14	-0.0885983	-0.217179	-0.20025	-0.247083
Glce	comp452670_c46	0.165121	0.0972334	0.152494	0.162573
Tcfap2b	comp460950_c18	-0.9435	-1.48121	-1.57041	-0.907698
Ccdc88b	comp451657_c1	2.29713	1.83961	1.79177	1.13607
Edem1	comp459657_c28	1.07669	0.79081	0.379846	0.285976
Col24a1	comp464903_c10	-1.13821	-0.961753	-0.592788	-0.646548
Jag2	comp463760_c22	0.249895	-0.300169	-0.467729	-0.461263
Samd4	comp460277_c4	-1.03885	-0.473795	-0.378069	-0.562821
Scn8a	comp450489_c12	-0.755109	-0.0292731	0.836078	0.915001
Prkce	comp461938_c8	0.212295	-0.332762	-0.283158	-0.480214
Cog5	comp464280_c29	0.204641	0.209113	0.324887	0.212845
Hnrnpu	comp462259_c13	0.627771	0.291656	0.197078	0.15438
Ftsj3	comp455347_c3	1.24245	1.68004	1.75857	1.45339
Cpeb4	comp460660_c2	0.325698	-0.0240467	-0.249185	-0.39418
Daam1	comp464295_c14	-0.067267	-0.164024	-0.348203	-0.516621
Esyt2	comp462615_c15	0.129636	0.26243	0.217715	0.122708
Cdc5l	comp461714_c2	0.121423	-0.0716105	-0.0502027	-0.234326
Kif5a	comp453757_c8	-1.53493	-1.05661	-0.632595	-1.10805
Zfp318	comp456789_c16	-0.784417	-0.450832	-0.355648	-0.343866
Smcr8	comp454102_c40	0.450015	0.126206	-0.00718111	-0.214068
Slc2a1	comp454647_c39	2.49935	1.23809	1.04883	0.826492
Man1c1	comp462144_c38	0.890051	0.60382	0.449811	0.206441
Kit	comp463492_c0	0.108454	0.54533	0.377705	0.495705
Rasal1	comp450871_c2	0.0765374	0.826269	0.462825	-0.0742477
Ddx54	comp461080_c22	0.896541	0.500593	0.338517	0.192207
Zdhhc14	comp460517_c28	0.406987	-0.255122	-0.418216	-0.321493
Sulf1	comp461769_c20	0.321921	0.706421	0.405431	0.0807256
C1339O16Rik	comp464650_c20	0.210477	0.284129	0.1918	0.0523418
Mme	comp463765_c26	-0.91553	-0.847169	-0.586905	-0.371399
Afap1	comp462774_c5	0.13727	0.57906	0.608129	0.283253
Clcn4-2	comp463150_c11	-0.698352	-0.926936	-1.02056	-0.967606
Sema3f	comp459645_c24	0.473254	0.322477	0.32438	0.307811
Ogdh	comp462573_c16	0.102003	-0.0697494	-0.298759	-0.452091
Capn7	comp464499_c19	0.158468	-0.0656597	-0.113884	-0.0665313
Vcp	comp465196_c19	1.18946	0.787717	0.688389	0.500908
Ptpn3	comp464564_c9	-0.273975	-0.396513	-0.735937	-0.551239
Atxn1l	comp464388_c24	0.339365	0.15941	0.233345	0.131597
Bcl6	comp458912_c6	-0.0665824	-0.660872	-1.08874	-0.958039
Hsp9ab1	comp457433_c2	0.889177	0.405807	0.306579	0.128731
Stxbp1	comp462077_c9	-0.0243787	0.55578	0.667253	0.468797
Qser1	comp459630_c3	0.0686889	-0.0705935	0.0349668	-0.0160446
Sema3b	comp461658_c4	-1.20411	-0.295786	0.185134	-0.0514859
Ppp2ca	comp464583_c22	0.352879	0.121775	-0.0683008	-0.0368831
Map3k3	comp462452_c14	0.307306	-0.0818679	0.00229027	-0.159838
Slc8a3	comp450396_c4	-1.84705	-1.74642	-2.00776	-2.19149
49342H24Rik	comp464834_c0	-0.403862	-0.0337056	0.181966	-0.0696519
Rasip1	comp449346_c0	0.432359	0.0828729	0.154936	-0.217426
Bmper	comp461164_c20	-0.827466	-0.00249695	0.248418	0.359656
Aff4	comp462164_c15	0.215996	0.134028	0.153675	0.0667286
Trim37	comp464493_c1	0.53556	-0.0654952	-0.094861	0.0246585
Lrp12	comp454292_c25	0.310279	0.292866	0.253288	0.198878
Fam49b	comp461294_c30	1.46269	0.599707	0.421651	0.308634
Cep12	comp464198_c32	-0.204338	-0.235716	-0.139495	-0.0710513
Nampt	comp460455_c42	0.00483287	-0.731794	-0.866349	-0.82914
Pappa2	comp366370_c1	1.15011	-0.542286	-0.229353	-0.461498
Hip1r	comp463595_c4	0.220817	-0.147047	-0.541834	-0.563472
Abca12	comp465068_c21	0.196399	-0.122583	-0.655163	-0.619902
Epha4	comp457713_c9	-0.570246	-0.64522	-0.725675	-0.414315
Abcc1	comp462411_c26	-0.282999	-0.0847423	0.0270944	0.0996473
Ggcx	comp451915_c0	0.263924	0.403194	0.391117	0.384014
Wwc2	comp462849_c24	-0.0620825	0.549455	0.607546	0.0881166
Usp9x	comp465164_c7	0.175889	0.0760035	-0.0693243	-0.144493
Ppp3cb	comp460222_c20	-0.109282	-0.0429657	-0.0637404	-0.0697598
Kcmf1	comp462236_c22	0.361063	0.0275114	-0.199126	-0.212746
Bbs9	comp456126_c5	0.119924	0.480487	0.713957	0.758984
Acsl6	comp450686_c2	-3.27699	-2.88334	-3.71829	-4.48569
Gopc	comp460574_c14	0.368835	0.205445	0.0571865	0.037064
Tubgcp5	comp462790_c2	-0.373114	-0.271817	-0.311383	-0.185433
Lingo1	comp366750_c1	-0.992643	0.670663	0.981976	1.11438
Phf15	comp464757_c21	-0.26619	-0.509131	-0.577238	-0.686703
Dhtkd1	comp459794_c14	-1.12683	-1.19268	-0.69464	-0.721968
Pla2g4a	comp463058_c24	0.0745262	-0.606335	-0.776814	-0.741051
Sp4	comp459603_c15	-0.535032	-0.532678	-0.332277	-0.337919
Hecw2	comp463598_c25	-0.148473	0.624195	1.04628	0.896596
Rab1	comp454015_c18	0.657133	0.20447	-0.0890342	-0.228425
Ddx23	comp464774_c8	0.4271	0.0508589	0.0694463	-0.0661712
Plekhm3	comp461135_c36	0.125695	0.13755	-0.11997	-0.145313
Cachd1	comp464338_c22	-0.851267	-0.858677	-0.66374	-0.562824
Smad6	comp460387_c7	0.184441	-0.102662	0.414728	0.274841
Ftsjd2	comp461387_c19	0.158962	-0.0140414	-0.1216	-0.0368224
Crnkl1	comp458505_c19	0.0362339	-0.0552045	-0.193439	-0.144495
Igsf1	comp459372_c28	-0.79291	0.134926	0.908895	0.97822
Slc44a1	comp462054_c0	0.485136	0.408362	0.37703	0.499977
Gys1	comp458706_c30	-0.121408	-0.551816	-0.531502	-0.833076
Celf1	comp462775_c9	0.343338	-0.0289844	0.0160408	-0.119619
Blm	comp462170_c17	0.604289	0.101539	0.194431	0.100542
Macc1	comp457836_c15	0.216242	0.0473809	-0.285843	-0.271678
Tpcn1	comp463817_c11	0.453235	0.198209	0.160336	-0.0565485
Cd163	comp461060_c11	2.32167	0.73383	-0.210976	-0.811996
Aars	comp463368_c24	0.436919	0.365121	0.353063	0.234416
Plxna2	comp459059_c8	-0.00194932	-0.23766	-0.36538	-0.486189
BC17647	comp450948_c3	0.100844	-0.0259372	-0.0421824	-0.184307
Hgs	comp461471_c11	0.810948	0.497976	0.466223	0.238654
Lrp1	comp457079_c8	0.843567	0.80571	0.791655	0.534356
B23312A22Rik	comp458539_c0	0.26467	0.301489	0.377189	0.0698988
Srp68	comp462818_c1	0.336588	0.165049	0.15975	0.0354812
Prkd3	comp462169_c21	-0.0144675	0.141416	0.185057	0.154155
Gprasp1	comp453843_c0	-0.37928	0.0798472	0.15647	0.0994013
Ap1b1	comp463826_c4	0.902077	0.312128	0.0515744	-0.0744337
Tbx2	comp450881_c0	-0.233554	0.663496	0.898772	0.712118
493146P16Rik	comp454029_c27	-0.0970934	0.168168	0.0763901	-0.265051
Cdc4	comp462667_c25	0.104752	-0.0865421	-0.190653	-0.154247
Irx5	comp458372_c34	-0.0791526	0.10943	0.421256	0.224741
Rdx	comp464132_c26	0.114177	0.193927	0.156971	0.0850772
Ndufs1	comp450992_c2	-0.254545	-0.598474	-0.82063	-0.996587
Gpr126	comp455492_c2	0.551525	0.128091	0.172797	-0.143151
Abce1	comp461834_c31	0.779933	0.311577	0.0355429	0.058389
Smek1	comp459904_c25	-0.132959	-0.351738	-0.340073	-0.327162
Sos1	comp460137_c3	-0.50315	-0.278095	-0.195473	-0.285769
Rpap1	comp461727_c7	0.857789	0.564974	0.470961	0.164361
Ppp5c	comp459396_c1	0.546479	0.0506449	0.0504822	-0.00174802
Mesdc1	comp462228_c0	0.894538	0.831608	1.00133	0.519173
Dpp8	comp461986_c25	-0.0357437	-0.0805901	-0.217652	-0.166338
Klhl15	comp455421_c30	-0.102895	-0.246879	-0.0618654	-0.0983003
Eya1	comp450889_c1	-2.11321	-1.52587	-1.22365	-1.74649
Tbc1d16	comp459523_c0	-0.714663	0.792619	1.17973	1.0662
Hspa1a	comp459947_c4	-0.0691042	-0.075813	-0.318108	-0.393038
Loxl4	comp461683_c26	-1.50041	-1.59166	-1.74425	-1.63713
Hhipl1	comp459383_c9	2.23447	3.60217	3.66661	3.0695
Zfp71	comp459549_c28	0.350912	0.0672196	-0.134869	-0.324686
Fbxo33	comp452939_c33	0.680684	0.325687	0.204533	0.234385
Lrrc8c	comp460391_c5	0.75871	0.476697	0.567896	0.293888
Sec63	comp459755_c1	0.0163551	-0.132801	-0.185154	-0.329428
Gab2	comp462488_c3	0.548395	0.112491	-0.0956566	-0.424237
Prep	comp465235_c22	0.570164	0.42061	0.426389	0.301245
Itgb6	comp464254_c19	-0.29213	-0.325689	-0.731614	-0.6689
Igf2bp3	comp456380_c15	-0.0396039	2.40773	3.38947	3.71292
Atp1b1	comp461097_c8	-0.839371	-0.840737	-1.12455	-1.18172
Ehmt2	comp461436_c4	0.4352	0.565006	0.796644	0.687182
Pnpla7	comp463834_c23	0.210069	-0.473445	-0.523168	-0.76401
Kbtbd2	comp455391_c21	0.53521	0.291105	0.12774	0.190137
Gltscr1	comp456077_c12	0.100431	0.361636	0.392058	0.297102
Kif3c	comp457461_c11	0.121398	1.0589	0.951543	0.454312
Ttc7b	comp463828_c10	0.233668	0.148725	0.29643	0.112831
Noc3l	comp463804_c1	0.240791	0.0171241	-0.116895	-0.195676
Letm1	comp460983_c17	0.894474	0.321446	0.315095	0.164815
Fuk	comp461509_c6	0.135233	0.163491	0.150712	0.0794215
Phka1	comp465048_c1	-0.231929	-0.409922	-0.38534	-0.458122
Nacc2	comp453180_c19	0.378965	0.421098	0.572132	0.0734337
Plcb4	comp464956_c29	-0.496597	-0.831972	-1.14581	-1.35611
Rab11a	comp455319_c35	0.608941	0.0881948	-0.334025	-0.343745
A2346K3Rik	comp465186_c9	0.255604	0.178241	-0.0848233	-0.0476997
Ttc15	comp456276_c5	-0.11806	-0.0774314	-0.111168	-0.269454
Phip	comp465074_c14	-0.0100371	-0.193106	-0.285156	-0.277478
Jmy	comp463423_c17	0.0348264	0.1016	0.0747562	0.0773109
Hivep3	comp455128_c30	0.787332	0.514225	0.384899	-0.266007
Fam18c	comp452736_c0	1.15309	0.634842	0.270943	0.242589
Ric8b	comp460001_c41	-0.146162	0.0989691	0.273555	0.194125
Pak2	comp461382_c11	0.576976	0.0402476	-0.080198	-0.300352
Stag1	comp460964_c32	0.140869	-0.09711	-0.0748001	-0.181814
Rasgrp3	comp462310_c0	-1.08078	-0.656785	-0.820634	-1.02374
Ciita	comp463808_c0	1.49697	1.3646	1.37735	0.94618
Tesk1	comp453903_c0	-0.194812	-0.29515	-0.263858	-0.335626
Arap1	comp464527_c25	0.508393	0.18379	0.07358	-0.0863664
Fyn	comp460560_c29	0.0151794	0.480687	0.786601	0.655328
Has2	comp457255_c21	2.28025	1.59855	1.59407	1.90098
Tsc22d2	comp459082_c18	0.481076	0.585627	0.368932	0.243053
Luzp1	comp462655_c7	0.142653	-0.0955821	-0.124472	-0.261975
Tmcc1	comp461796_c19	-0.0622854	-0.129812	-0.259382	-0.289997
Ezh1	comp463183_c3	-0.878099	-0.748542	-0.653735	-0.713878
Nckap1l	comp464524_c17	2.62911	1.67741	1.29452	0.84034
Stc1	comp452608_c18	0.862965	-0.0568383	-0.443256	0.0595668
Ddx1	comp464193_c21	0.335019	0.0766131	-0.0558329	-0.0863044
Mybpc1	comp461847_c7	-3.24575	-3.07785	-2.67063	-3.39321
Eif4e	comp457066_c15	0.627104	0.0636577	-0.182762	-0.179879
Fam115a	comp457827_c10	-0.0880057	0.474374	0.513872	0.381923
Rab2a	comp459530_c16	0.129678	0.304098	0.191577	0.138133
D8331N3Rik	comp454448_c25	-0.102131	0.233827	0.22026	-0.0416006
Tex2	comp463242_c26	-0.141867	-0.298175	-0.486151	-0.552403
Otud5	comp454802_c6	0.139307	0.216705	0.131439	0.0625065
Pam	comp462477_c6	-0.715335	-0.300802	0.0568751	0.00202935
Nup17	comp464571_c21	0.533045	0.0326788	0.0674594	0.0413209
Zfr	comp456271_c9	-0.152723	-0.34321	-0.285003	-0.34323
Dclk2	comp460953_c16	-0.576293	-0.171475	0.11465	0.414283
Naa3	comp462879_c16	0.215347	0.109819	0.111923	-0.092662
Whsc1	comp459968_c5	0.660305	0.366743	0.502285	0.339657
Crebzf	comp450663_c0	0.0530432	0.0271483	0.0696572	-0.0565158
Capn6	comp463283_c37	-0.593881	1.31526	2.30434	2.26878
Pole	comp464934_c8	0.860321	0.527071	0.621155	0.530964
Usp5	comp462500_c3	0.729336	0.58753	0.474689	0.27396
Klhl11	comp464380_c20	0.144929	-0.0763864	-0.0544504	-0.021205
Sestd1	comp463266_c9	0.242551	0.187818	0.136223	0.027381
AI31418	comp464817_c18	-0.0656845	-0.0753708	-0.171003	-0.20535
Wwc1	comp460633_c4	-0.18682	-0.680338	-0.998263	-0.943088
Appbp2	comp462894_c4	0.390394	0.133172	0.025536	-0.074567
Cul9	comp459129_c1	0.0629221	-0.0655781	0.130979	0.00588089
Tbx15	comp460688_c12	-1.42526	-0.493151	-0.0259033	0.00691458
Kifc2	comp456002_c33	0.0897292	0.178611	0.130907	0.0435379
Bclaf1	comp458686_c6	0.111371	-0.0142786	-0.0755983	-0.116325
Top2a	comp460587_c5	1.70556	0.93837	1.02234	0.974149
Sbf1	comp464424_c2	0.27812	0.164349	0.191896	0.128515
Plag1	comp452346_c6	-0.598939	-1.04639	-1.18623	-1.008
Zfyve9	comp463638_c10	-0.641884	-0.763182	-0.860024	-0.771293
Snx2	comp460149_c15	0.553236	0.212176	-0.0333166	-0.148728
Hexim1	comp340982_c0	0.663094	0.20389	0.200571	0.146636
Ebf2	comp459248_c11	-1.25259	-0.473017	-0.534091	-0.936768
Zc3h3	comp458397_c14	0.186216	-0.0666573	0.122492	-0.0349941
AI464131	comp454234_c20	-0.753571	-0.617035	-0.0621693	-0.480109
Med24	comp463604_c4	0.204362	0.0385295	0.0377669	0.0887181
Pacsin2	comp461814_c2	0.200875	0.0153871	-0.260644	-0.452192
Man1a2	comp461121_c29	0.574783	0.439999	0.372232	0.299781
Rnf216	comp463193_c12	0.271972	0.2011	0.148693	0.0702965
Alms1	comp458966_c11	-0.377369	-0.38036	-0.225724	-0.147176
Pdzd4	comp445829_c0	-0.0800974	0.619927	1.37954	1.30857
Dnajc7	comp460755_c20	0.245445	-0.0195482	-0.0887566	-0.0709206
Lrsam1	comp463582_c17	0.418144	0.558083	0.505593	0.387487
Col8a2	comp463177_c25	-0.180468	1.23186	1.46096	1.07187
Gars	comp459668_c5	1.10744	0.908887	0.528998	0.40918
Unc45a	comp462887_c13	0.689884	0.355138	0.294663	0.263062
Sugp2	comp461517_c18	0.126138	0.0477223	0.135972	0.0932234
26131G19Rik	comp456505_c11	0.681791	0.482753	0.381778	0.281695
Arvcf	comp461862_c6	-0.759816	0.0141307	0.220386	0.137778
Slc12a2	comp464587_c17	-0.819088	-0.823113	-0.896302	-0.913118
Taf6	comp460297_c14	0.27133	-0.0720907	-0.0289023	0.0851547
Pde3b	comp462748_c5	-0.0416742	-0.252102	-0.264533	-0.446934
Fbxo3	comp455729_c17	0.397927	0.199586	-0.223225	-0.253902
Nol1	comp464408_c17	0.460061	0.225698	0.200754	0.251732
Hells	comp464976_c21	-0.0830932	-0.00181563	-0.0215956	-0.00229424
Eed	comp460463_c14	0.281965	0.019833	-0.223896	-0.151601
Ermp1	comp459484_c1	-0.329139	-0.41734	-0.766459	-0.618646
Dync1i2	comp461586_c38	0.392879	0.29342	0.146308	0.0594711
	comp462793_c3	0.397173	0.172024	0.139821	0.0971165
Cyfip2	comp451047_c6	0.488786	0.393536	0.583743	0.948842
Srsf8	comp462921_c13	0.119796	-0.00535479	-0.0212451	-0.051473
Ctnna1	comp461635_c19	0.428002	0.164793	-0.0766387	-0.0943057
Gm9766	comp462893_c2	-0.729645	-0.745702	-0.669775	-0.884747
Nid2	comp462652_c7	0.323873	0.949013	1.14044	0.993819
Khsrp	comp459361_c3	0.856574	0.543815	0.604945	0.433428
Stip1	comp455290_c9	0.593375	0.0892103	0.0556906	-0.055995
Abcb4	comp465037_c23	0.288296	-0.172663	-0.379912	-0.370544
Ppm1g	comp452291_c0	1.39285	0.715937	0.526504	0.352934
Grin2d	comp451222_c3	-0.00398793	0.844897	0.895231	1.06017
Amd2	comp465201_c6	0.580505	0.102084	-0.172903	-0.0503509
Srebf1	comp458532_c2	-0.0744514	-0.233386	-0.316633	-0.377802
Spata2	comp447643_c0	-0.917847	0.409533	1.14539	0.869127
Pde1b	comp456254_c6	0.516419	2.59463	2.86115	1.9801
Abcf3	comp460826_c5	0.409563	0.237546	0.14692	-0.0750318
Lepre1	comp460460_c6	0.390716	1.35536	1.58604	1.28882
Ptpn9	comp460628_c12	0.537911	0.38877	0.453866	0.286826
Ppp1r13b	comp453345_c22	-0.204984	-0.393134	-0.659302	-0.470912
Ehd1	comp456353_c31	1.36696	0.730209	0.444504	0.106921
Capn5	comp461701_c12	-0.236003	0.325595	0.485771	0.383389
Osbpl6	comp461909_c10	-1.01493	-0.528311	-0.00981183	-0.174685
Rps6ka1	comp462383_c9	1.39284	0.0364226	-0.115825	-0.127322
St7	comp462905_c27	0.0979414	0.211134	0.159058	0.154227
Ywhaq	comp458714_c8	0.937386	0.573735	0.367239	0.186437
Pde1a	comp460048_c29	0.680495	1.63755	1.4817	0.810319
Tnxb	comp463032_c3	-0.533642	-0.187001	-0.704886	-1.12468
Fbxo11	comp463304_c4	0.15803	-0.0633728	-0.0811314	-0.0811078
Ankar	comp452150_c7	0.0525603	-0.0475779	-0.176044	-0.242608
Dyrk2	comp456458_c17	0.0760933	0.039494	0.131276	-0.0669679
Vav2	comp464022_c12	0.921334	0.803382	0.644587	0.274211
Olfml2b	comp457958_c15	-0.0285168	2.4876	2.12595	1.48897
Xpot	comp463249_c17	0.720431	0.470102	0.293624	0.281663
Mtmr1	comp461797_c22	0.0123002	-0.106193	-0.390136	-0.40474
Dock7	comp463893_c21	0.244707	0.379311	0.459599	0.441954
Slc6a9	comp456951_c2	-0.199299	-0.291121	-0.329161	-0.468354
Tbc1d19	comp463307_c9	-0.372429	-0.284885	-0.151795	-0.204945
Rybp	comp460387_c31	0.499704	0.0819706	0.504339	0.385843
DQ539915	comp127787_c0	-2.54308	0.121907	-2.15785	-1.97841
Gan	comp458307_c21	-0.324126	-0.0824408	-0.366824	-0.397182
Abcd1	comp455076_c0	0.712657	0.524075	0.628247	0.309121
	comp454020_c7	-0.393668	-0.637179	-0.161479	-1.116
Ccnt1	comp464657_c14	-0.0447982	-0.173461	-0.156244	-0.292966
Smap2	comp456163_c14	1.64649	0.919222	0.632396	0.400718
Zfp592	comp458071_c7	-0.0726107	-0.0764794	-0.122028	-0.14473
Atp2a1	comp461026_c15	-1.84933	-2.21761	-2.39209	-2.71773
Dis3l2	comp464133_c31	-0.215938	-0.222984	-0.347569	-0.168024
Mut	comp464501_c3	-0.625348	-0.601138	-0.646168	-0.6683
Myh9	comp464961_c13	1.65838	1.90024	1.46191	0.905942
Chtf18	comp461694_c3	1.52462	1.16141	1.15948	1.13046
Zdhhc5	comp452518_c7	0.519623	0.0394483	-0.0610476	-0.118966
Zw1	comp462695_c11	0.869388	0.723588	0.678441	0.444218
42253	comp459242_c7	0.542348	0.325041	0.385552	0.0343041
Ank	comp456179_c24	-0.54772	-0.738607	-1.08042	-1.14228
Zhx2	comp452379_c17	-0.415281	-0.56216	-0.553647	-0.636401
Gpc3	comp452527_c32	-0.532964	0.552854	1.16204	1.98973
Rap1b	comp453640_c3	1.28353	0.599085	0.256751	0.136264
Enc1	comp453310_c20	1.14009	1.56825	1.54483	1.44364
Slc6a14	comp455740_c2	1.30108	-0.577121	-1.60498	-1.53483
Rala	comp457640_c27	0.463	0.128942	0.191654	-0.17436
Dis3	comp463599_c21	0.0444178	-0.177883	-0.213186	-0.140351
Shoc2	comp456519_c12	0.303509	0.0830723	-0.0291163	-0.0636165
Traf3	comp462586_c8	0.651764	0.48895	0.504386	0.411253
Mtap1a	comp461720_c17	-0.510045	0.383547	0.581225	0.140736
Ythdf2	comp460237_c8	0.264644	0.0359982	-0.133456	-0.118767
Ube4b	comp462984_c15	0.360237	0.279973	0.176079	0.114706
Chd2	comp465044_c15	0.457896	0.341458	0.246887	0.264261
Grip1	comp461746_c21	0.322666	0.297385	0.549345	0.569411
Cramp1l	comp463226_c12	0.362663	0.307468	0.382195	0.266186
Ubr1	comp464856_c27	0.014935	0.0591149	0.107209	-0.00730356
Phtf2	comp463572_c24	0.258035	-0.231015	-0.403189	-0.404438
Aacs	comp462019_c41	-0.213095	-0.351456	-0.613674	-0.599375
Amfr	comp459509_c1	0.357852	-0.0171397	-0.172275	-0.192068
Azin1	comp460160_c9	0.492702	0.154416	0.0803563	0.0367684
Trim36	comp450158_c2	1.14074	0.955017	0.599606	0.299155
	comp457306_c8	0.342154	0.118761	0.302081	0.152797
Ctps2	comp463496_c24	0.261917	0.118782	-0.127109	-0.103172
Lnpep	comp461603_c0	-0.496636	-0.698805	-0.803947	-0.84402
Eml2	comp460452_c4	1.02156	0.313998	0.204819	0.006463
Srpr	comp453362_c0	0.573483	0.339598	0.255325	0.0995788
Akt3	comp462920_c28	-0.382987	0.0993085	0.163609	-0.0522143
Comp	comp452285_c1	-0.704616	-0.77484	-1.00288	-1.55291
Abr	comp463506_c25	0.785655	0.554893	0.600493	0.465863
Rhot1	comp462976_c10	0.0289586	-0.147402	-0.225138	-0.230491
Exoc2	comp464445_c2	0.223807	0.0581886	-0.106593	-0.0872269
Ephb3	comp462655_c4	0.166932	0.422833	0.6453	0.557635
Scnn1a	comp454567_c7	0.0941599	0.0791236	-0.419835	-0.31606
Thsd1	comp452355_c9	-0.581195	-0.544259	-0.476457	-0.715354
Klhl2	comp459944_c10	0.0128442	0.089492	0.144684	0.0838628
Grin3b	comp457624_c5	-1.87898	-1.47133	-1.89111	-1.55758
Etfdh	comp458007_c6	-0.107752	-0.420041	-0.547027	-0.784823
Pik3cd	comp461855_c1	2.10431	1.18193	0.947627	0.59593
Fam135a	comp455452_c12	-0.126352	-0.0558578	-0.300907	-0.158257
Pcbp3	comp451051_c1	0.4812	0.219529	0.507013	-0.434296
Mars	comp458779_c16	1.19171	0.665748	0.474005	0.391128
Gpr116	comp464027_c6	-1.22981	-1.03238	-1.25819	-1.68781
Api5	comp460026_c8	0.913101	0.497825	0.357272	0.341677
H6pd	comp451199_c17	1.41895	0.998365	0.838272	0.155522
Rnf217	comp459648_c8	0.43245	0.215312	0.111011	0.0239194
Srp54b	comp462555_c7	0.232	0.0603451	-0.18438	-0.213732
Uvrag	comp461552_c30	0.714089	0.305479	0.282078	0.226151
63419C18Rik	comp450350_c7	-0.51522	1.24568	1.57404	1.38452
Ccar1	comp464041_c9	0.311866	0.0423138	0.0650382	0.0390844
Akap1	comp459520_c3	-0.747053	-0.489481	-0.703007	-0.785372
Ern1	comp464013_c10	0.719733	0.512291	0.441009	0.256263
Abcc4	comp464292_c8	0.274256	-0.15689	-0.238119	-0.297504
Mll3	comp462924_c20	-0.42348	-0.487718	-0.416516	-0.473841
Ubash3b	comp464091_c33	0.467424	0.441097	0.208307	0.094736
Zfp238	comp459086_c6	0.0898754	0.0735255	-0.0798889	-0.425686
Fam13a	comp462195_c24	-1.29216	-1.09699	-0.977327	-1.28957
Ccdc12	comp456953_c8	0.495652	0.202518	-0.242787	-0.431406
Gemin5	comp464241_c8	0.831691	0.415239	0.449137	0.442791
Gart	comp462952_c0	0.821829	0.402984	0.392353	0.299516
Zfp532	comp453882_c14	-0.0936382	0.420989	0.661748	0.616256
Ranbp6	comp452423_c5	0.730798	0.386622	0.263802	0.291891
Trim32	comp450548_c24	0.00816944	0.232947	0.460385	0.321667
Ptpn23	comp459866_c26	0.380567	0.179348	0.302484	0.260003
Mcm3	comp462257_c6	1.81454	0.987059	0.988796	0.98636
Sec24c	comp461499_c18	0.629552	0.314261	0.247439	0.0132262
Gsk3b	comp461386_c16	0.375545	0.202421	0.114364	-0.0307846
Pkn2	comp463134_c9	-0.0109136	-0.194936	-0.175407	-0.208522
Slc39a1	comp460945_c12	0.580314	0.449929	0.39088	0.567246
18113L24Rik	comp451945_c26	0.419167	0.184927	0.1069	0.0565621
Ola1	comp457757_c5	0.302425	0.222268	0.00612596	0.0723372
Vps18	comp457483_c31	0.864479	0.463189	0.353797	0.323491
Map2k4	comp461905_c19	0.187378	-0.19224	-0.444383	-0.360362
Adar	comp459438_c27	0.707323	0.137963	0.460184	0.286774
Fnbp1l	comp463097_c15	-0.801153	-0.535387	-0.308038	-0.226417
Slc9a7	comp454604_c5	0.395098	0.445302	0.308554	-0.152751
Cdh22	comp450090_c0	0.529938	0.71839	0.736493	0.738293
Wapal	comp461492_c17	0.0635377	0.0558664	-0.259998	-0.264331
Epm2aip1	comp453927_c53	-0.196264	-0.0120802	0.0150402	0.071603
Fbln1	comp462027_c26	-0.22205	-0.334865	0.122113	0.130536
Ube2b	comp460436_c6	-0.301146	-0.322974	-0.467379	-0.481215
Gpld1	comp463316_c11	0.221294	-0.121408	-0.580657	-0.469678
Kdm2b	comp459285_c17	-0.195134	-0.228027	-0.230843	-0.353751
Srf	comp452962_c0	0.595411	0.446145	0.307133	0.137124
Cul2	comp462983_c31	0.471183	0.0256754	-0.0322481	-0.0598949
Chn2	comp455299_c5	-0.216715	-0.165071	-0.157639	-0.44067
Cpxm2	comp462364_c3	-2.06206	-1.4955	-1.3155	-1.49344
Exoc8	comp340786_c0	0.647976	0.693824	0.562866	0.473407
Mapk8ip1	comp452672_c6	0.208867	0.0232186	0.186412	0.203508
Cul1	comp464924_c28	0.0392507	0.0289837	-0.060813	-0.131961
Nufip2	comp460432_c31	0.267817	0.0141488	-0.133792	-0.122559
Glud1	comp456416_c21	0.374701	0.0791335	-0.0972095	-0.180111
Itih5	comp459848_c2	-1.11296	-0.191658	0.416314	0.2101
Slc41a1	comp460549_c10	-0.349501	-0.616422	-0.538051	-0.697599
Bahcc1	comp458760_c3	0.212741	0.948042	1.06518	0.724498
Gnl2	comp461206_c0	0.587641	0.103889	-0.0360196	-0.032485
Prkcb	comp463578_c9	1.63657	1.06676	1.14	0.80812
Itgb3	comp459756_c2	1.09449	2.71481	2.10865	1.46573
Ctnnd2	comp463602_c15	-0.649726	-0.195379	-0.40685	-0.31336
Atn1	comp462501_c29	0.0775728	-0.0836503	0.798503	0.171749
Tcf7l1	comp456226_c0	-0.422608	0.157356	0.635786	0.615272
Slc45a4	comp456558_c16	1.37952	1.42873	1.4568	1.3889
Cdh15	comp366661_c0	-1.16798	1.02306	0.343904	-0.746815
Nfe2l1	comp461201_c17	0.143664	0.228306	0.149811	-0.165094
FELE-1	comp464392_c3	-0.54567	-0.602284	-0.929246	-0.998891
Padi2	comp459443_c0	-0.52892	-1.20141	-0.970327	-1.62346
Usp1	comp460803_c10	0.462737	0.273617	0.255942	0.23779
Card1	comp463390_c6	0.72567	0.455384	0.228502	0.112016
Nr6a1	comp455021_c13	-0.278589	-0.307451	-0.311813	-0.0521273
Smarcad1	comp461412_c18	-0.258969	-0.301531	-0.353002	-0.290603
Dnaja2	comp453046_c14	0.287519	-0.0338733	-0.183157	-0.22786
Abca7	comp463888_c0	0.469029	0.605633	0.908138	0.603698
Hspa12b	comp450315_c1	-0.145081	-0.157032	0.254499	0.119145
Eif2c4	comp463903_c5	0.609057	0.145075	-0.0405607	-0.0831597
Arhgef17	comp462951_c6	-0.0878071	0.574713	0.821671	0.590366
Osbpl11	comp462216_c9	0.58785	0.193234	0.0483225	0.000335623
Foxk1	comp461046_c1	0.272704	-0.0220444	0.253353	-0.0903461
Palld	comp462188_c18	0.0853495	1.45227	1.29652	0.888657
Rcor2	comp460314_c4	-0.417226	0.348765	0.520632	0.238801
C3346G3Rik	comp461615_c12	-1.41329	2.10408	2.36107	2.98189
Iars	comp464701_c18	0.391488	0.236681	0.0960776	0.0965228
Mast4	comp461948_c5	0.894774	0.346828	0.115576	0.00281304
Puf6	comp454886_c6	0.391218	0.201716	0.222223	0.0592364
Smg5	comp462831_c5	0.615443	0.295271	0.174766	0.0552857
Plod1	comp459614_c4	0.541691	0.856617	0.854712	0.674985
Mecp2	comp462929_c38	-0.344039	-0.324713	-0.303418	-0.411211
Rai2	comp446591_c0	-2.02885	-1.66887	-1.35463	-1.55672
Gmeb2	comp456968_c30	0.523482	0.340945	0.200045	0.168536
Itpripl2	comp452913_c20	0.944655	1.0591	1.09216	0.613225
B4galnt4	comp459323_c7	0.852179	1.09752	1.29528	1.47183
Sf3b3	comp461679_c3	0.691841	0.369708	0.272496	0.267225
Pom121	comp460169_c7	0.763497	0.307434	0.282176	0.0775959
Adamtsl3	comp464151_c28	-1.53424	-0.956087	-0.619174	-0.768518
Mtss1	comp458710_c10	0.758114	0.23455	-0.0244448	-0.0732126
Dlg1	comp463648_c6	-0.0161905	0.0605381	0.0375226	0.0919328
Trp53bp1	comp464438_c6	-0.296958	-0.167329	0.117631	0.0578148
Ift81	comp462556_c4	-0.387502	-0.149586	0.0746504	0.0440695
Dync1li2	comp459760_c7	0.152767	0.0937292	0.090577	-0.105573
Vac14	comp462199_c5	0.873868	0.354775	0.289008	0.178391
Tbc1d8b	comp464428_c8	-0.449534	0.208281	0.351145	0.378065
Nav1	comp464709_c17	0.609883	0.626779	0.551346	0.219636
Inadl	comp465087_c4	0.191003	-0.128182	-0.336997	-0.311755
Tecpr1	comp463076_c19	-0.184657	0.210592	0.118704	-0.00232128
Uhmk1	comp455327_c0	0.68987	0.342934	0.0346837	0.0778511
Trap1	comp461538_c18	0.411651	0.0107654	-0.0611181	-0.113283
Mtmr7	comp449277_c3	-0.55339	-0.545011	-0.220113	-0.258696
Cirh1a	comp463332_c2	1.15101	0.540411	0.392037	0.291571
Lpar4	comp449546_c5	-0.736348	0.371027	0.728787	0.576524
Grid1	comp449361_c1	-0.340912	0.0299407	0.868834	1.28242
Wdr3	comp464226_c16	0.741711	0.219761	0.116447	0.173538
Tbx3	comp459461_c9	-0.199478	-0.314985	-0.672262	-0.55063
Cc2d1a	comp463797_c7	0.171592	0.0801201	0.037256	-0.084458
Kif16b	comp464312_c24	-0.340311	-0.172375	-0.173219	-0.239136
Cecr2	comp459515_c5	0.138495	-1.18693	-1.22261	-1.17084
Slc16a2	comp458826_c22	0.353329	1.30287	1.33795	0.934526
Ncstn	comp460350_c15	0.459314	0.193646	0.0849028	0.0186933
Wnt5a	comp463129_c13	0.385025	1.61367	1.58298	1.58974
Colec12	comp455896_c4	0.206264	0.419416	0.0447481	-0.133462
Hsd17b4	comp463315_c24	-0.128848	-0.387981	-0.514929	-0.479967
	comp451223_c0	-1.56516	-1.36273	-1.16893	-1.58347
Prmt5	comp460858_c4	0.926563	0.374714	0.326986	0.396674
Satb1	comp464935_c26	-0.0636761	0.418042	0.575966	0.309677
Dsg3	comp461885_c2	2.24782	0.473984	-0.121191	-0.0903834
Eef1a1	comp464529_c16	0.31279	0.250429	0.13628	0.118692
Fam189b	comp463984_c5	0.0605392	0.498591	1.09311	0.794064
Slc12a4	comp464331_c0	-0.196749	0.0275638	0.261524	0.160403
Prickle1	comp456198_c34	0.145753	1.32433	1.28485	1.0959
Zcchc14	comp459697_c2	0.396518	0.582195	0.59573	0.429542
Ap3b1	comp464860_c9	0.431167	0.250243	0.166121	0.105119
Nfasc	comp452178_c23	-1.0759	-0.188036	-0.0888476	-1.37383
Suz12	comp463160_c20	0.401275	-0.0162669	-0.0427153	-0.136994
Tcerg1	comp465208_c25	0.289703	0.048866	-0.0132146	-0.0589886
Gse1	comp463453_c8	-0.0452471	-0.0159041	-0.108008	-0.0356821
Ptpra	comp464576_c20	0.262729	0.107323	0.015374	0.0333401
Nol6	comp463293_c3	1.0996	0.518549	0.662189	0.488733
Hivep1	comp454386_c1	-0.0723535	-0.281353	-0.456215	-0.535973
Klhl21	comp457291_c17	0.188099	0.0962588	-0.0180035	-0.0439213
Pik3ap1	comp462003_c8	3.77938	2.28709	1.73518	1.12347
Ino8	comp463559_c11	0.119645	-0.0463612	-0.105895	-0.0340585
Ankrd5	comp456903_c10	0.666062	0.44163	0.456771	0.438686
Ddx5	comp463148_c10	-0.0190893	0.177168	0.202969	0.288848
Arf1	comp462812_c36	0.775444	0.430713	0.242807	0.118588
Spire2	comp458703_c1	0.986709	0.202827	-0.0451055	-0.147907
Hspa4	comp462373_c31	0.743609	0.206301	-0.0125295	-0.0228648
Bap1	comp457859_c1	0.34587	0.151003	0.202031	0.0405674
Vav3	comp463381_c14	1.61702	0.574792	0.383601	0.256577
Mpdz	comp465130_c3	-0.951814	-0.372898	-0.256422	-0.37243
Plch2	comp462999_c11	0.581079	0.118824	-0.094218	-0.0594827
Ppp1cb	comp464243_c23	0.25244	0.0613757	-0.138886	-0.147701
Gabpa	comp461896_c15	0.151862	-0.197073	-0.294182	-0.314122
4933424B1Rik	comp460584_c1	0.130808	0.0438874	-0.024563	0.025481
Sdha	comp457258_c16	-0.361445	-0.459322	-0.710246	-0.857731
Tmem8	comp455433_c29	2.22518	1.25071	0.903921	0.167235
Rufy1	comp462580_c17	0.568359	0.639455	0.533339	0.250798
Sema6b	comp455074_c0	2.82152	1.73374	0.910295	0.295671
Ankrd12	comp457852_c28	-0.662	-0.637158	-0.446763	-0.496934
Prpf3	comp462137_c17	0.053486	-0.159414	-0.0119418	-0.0586727
Fbxl18	comp455494_c12	0.744073	0.514177	0.540568	0.486315
Ptpre	comp463533_c12	1.28144	-0.0684087	-0.453146	-0.42465
Dpp4	comp463144_c21	-1.12411	-0.40779	-0.610454	-0.929553
Acss1	comp460225_c21	-1.55833	-0.823501	-0.400475	-0.369406
Sh2b1	comp458518_c10	0.262264	0.08879	0.14167	-0.0290192
Dusp8	comp452698_c8	-0.867929	-0.731233	-0.652326	-0.696853
Lrrc8e	comp452522_c8	0.550625	0.121935	-0.580745	-0.027433
Mapk8ip3	comp463587_c10	0.0951772	-0.00911353	0.106949	-0.0435247
Dpy19l4	comp463830_c6	0.180735	0.283411	0.196519	0.242924
Hbp1	comp457010_c29	0.0395964	0.138253	-0.0378861	-0.0511735
Trio	comp463295_c15	-0.518588	0.241484	0.314972	-0.00897984
Lhx2	comp463965_c5	-0.613339	-0.725001	-0.658582	-0.0690286
Topors	comp465001_c2	0.116251	-0.129589	-0.140679	-0.144933
Zbtb4	comp459337_c12	0.594627	0.402048	0.228781	0.388791
Gpr173	comp457436_c16	-0.201713	0.98156	1.11538	1.05527
	comp458176_c9	-0.37638	0.214693	0.388294	-0.00453647
Spns2	comp462959_c9	-0.0675848	0.0846901	-0.527148	-0.544143
Kif13b	comp463127_c27	0.203872	-0.00794287	-0.198403	-0.201781
Vav1	comp461851_c5	3.25169	1.97009	1.36235	1.01181
Fert2	comp464590_c11	-0.482868	-0.0658712	-0.249299	-0.37534
Slc5a9	comp461545_c8	-1.22532	-0.679736	-0.750206	-0.726035
Cttnbp2	comp461549_c24	-0.908826	-0.558759	-0.406139	-0.360814
Nckipsd	comp454906_c18	0.480708	0.378487	0.24489	0.151275
Eif2c2	comp462624_c8	1.02892	0.440243	0.312345	0.246074
Cacnb3	comp450857_c0	0.485662	2.11558	2.43365	2.21119
Btbd3	comp464314_c17	0.277417	0.266377	-0.087175	-0.121776
Snx1	comp461211_c9	0.710868	0.489077	0.421296	0.209527
Ccdc22	comp458745_c7	0.865949	0.473078	0.357354	0.335322
Igf2r	comp465077_c13	0.372827	0.270733	0.194298	0.153239
Fzd9	comp326987_c0	-1.23079	-1.69838	-2.02991	-1.44848
Alcam	comp461520_c1	-0.439767	-0.374438	-0.158692	0.276189
Jag1	comp463843_c3	0.725777	0.39895	0.0517977	0.0845005
Polr2b	comp460427_c2	0.528572	0.181183	-0.0920346	0.0133436
Arcn1	comp458167_c18	0.700628	0.6381	0.563429	0.408602
Zbtb16	comp459964_c31	-1.20752	-2.07637	-2.06488	-2.2925
Sh3rf2	comp460451_c9	-0.945525	-0.754523	-0.786314	-1.01483
Frem1	comp460676_c21	-0.886198	-0.766865	-0.0733	0.483084
Mn1	comp457984_c25	-1.29298	-0.593533	-0.00154806	-0.345717
Slc25a12	comp461393_c4	-0.758934	-0.862077	-0.9328	-0.998341
Pls3	comp462118_c8	0.536603	0.0588738	-0.295983	-0.309033
	comp459886_c6	-1.06265	-0.54031	-0.773473	-0.808077
Cry1	comp458793_c3	-0.0849825	-0.57237	-0.437484	-0.444337
11114N23Rik	comp460980_c16	0.475204	0.358388	0.297214	0.116133
Ppp2r5b	comp457907_c3	-0.250743	-0.00916308	-0.0766552	-0.160452
Enox2	comp452688_c4	-0.0489638	-0.396732	-0.498439	-0.424955
Atp12a	comp450707_c2	-0.00821329	-0.545674	-0.635505	-0.868663
Tars	comp462696_c3	0.653726	0.317971	0.151422	0.0963808
Rock1	comp463965_c17	0.154383	0.00913828	-0.171266	-0.198092
Mylk2	comp453590_c0	-2.71405	-3.23249	-2.71975	-2.99454
Tmem48	comp462627_c26	0.914071	0.163885	0.248216	0.289434
Dpy19l3	comp464423_c12	0.308061	0.498076	0.65463	0.65998
Slc9a9	comp463449_c28	0.116868	-0.290001	-0.457619	-0.539311
Tbl1x	comp461897_c15	0.472622	0.256474	0.187345	0.0210532
Larp4b	comp464138_c36	0.402918	0.0403686	-0.138815	-0.127923
Scara3	comp464624_c19	-0.244987	-0.30716	-0.435019	-0.824414
mKIAA1757	comp464528_c10	0.125905	0.179176	0.179258	0.085458
Cnot3	comp461843_c4	0.164782	0.00996402	0.106687	-0.0290307
Atp2b1	comp463984_c15	0.756746	0.390648	0.163287	0.021675
Clint1	comp458187_c1	0.672012	0.251994	0.203746	-0.0425862
Cdk5rap2	comp465082_c10	0.23325	0.126545	0.430242	0.242075
Mtmr3	comp463921_c32	0.206234	0.135376	0.00949071	0.0140238
Ptprs	comp460905_c0	-0.218899	0.177326	0.710428	0.617838
Ppfibp1	comp464671_c19	-0.25321	0.0323623	-0.116667	-0.326387
Inpp4b	comp464344_c13	-0.762542	-0.619583	-0.56538	-0.970632
Mmp2	comp451281_c2	1.16891	1.44499	1.28298	1.11999
Dnajc16	comp459734_c5	0.466355	-0.00487412	-0.0336804	-0.161603
Agbl5	comp442868_c0	-1.01559	-0.692933	-0.548702	-0.551797
2313H1Rik	comp451119_c15	0.687968	0.372569	0.474116	0.295533
Zfyve26	comp464966_c11	0.236503	0.00203543	-0.0165842	-0.122691
Wnk2	comp464135_c7	-1.03922	-1.12153	-1.28435	-1.09712
Slc2a13	comp456023_c3	-0.196011	0.218172	0.283243	0.263173
Clcn2	comp458504_c6	-1.08034	-0.872646	-0.386316	-0.235704
Mocos	comp463220_c8	0.0907906	0.00680435	-0.259033	-0.44341
Cops2	comp460673_c15	-0.0307571	-0.2114	-0.349594	-0.395692
Kirrel	comp463342_c24	0.0667855	0.425502	0.638037	0.423531
Gpc4	comp453715_c23	-1.02268	0.0375675	0.16423	0.135377
Dll4	comp451206_c9	-0.477992	-0.632244	-0.663772	-0.736308
Wdr81	comp459237_c6	1.07337	0.849076	0.923136	0.573568
Bmpr1a	comp462718_c21	-0.255881	-0.217805	-0.261399	-0.124024
Wdr9	comp464716_c6	1.14295	0.778886	0.998335	1.12183
Strbp	comp464570_c20	-0.0773059	-0.355429	-0.31053	-0.31898
Chpf	comp449994_c0	-0.0415396	0.951035	1.0984	0.760167
Accn2	comp460616_c8	-0.984156	-0.0589032	0.22979	-0.74326
Rgs12	comp456770_c11	-0.167297	0.412178	0.672275	0.530456
Alpk3	comp459068_c2	-1.84806	-1.30463	-1.34838	-2.58961
Med17	comp460668_c10	0.1344	0.0548751	-0.192935	-0.12951
Synpo2l	comp454600_c10	-1.14486	-0.0017774	-0.126683	-1.24011
Trip1	comp459594_c4	-0.236591	-0.248807	-0.230651	-0.425898
Deaf1	comp461582_c32	0.167484	0.277317	0.30635	0.160639
Larp1	comp461456_c18	0.7664	0.243044	0.235875	0.0967428
Hps6	comp337451_c1	0.376648	0.211164	0.336872	0.162451
Fbxo46	comp457014_c16	0.406028	0.274757	0.345393	0.151107
26111N1Rik	comp464107_c5	-0.110322	-0.222779	-0.255217	-0.300589
Plxdc2	comp462012_c14	-0.598523	-0.338855	-0.575399	-0.681153
Agap3	comp460989_c3	0.419826	0.331657	0.229568	0.139101
Kbtbd8	comp450063_c2	0.69717	-0.259436	-0.331487	-0.257051
Herpud2	comp455562_c21	-0.0864867	-0.247769	-0.334254	-0.455541
Nsun2	comp461477_c2	1.00108	0.489774	0.440341	0.351217
Csrp2bp	comp460698_c10	0.165107	0.0825565	0.343619	0.149265
Megf9	comp465011_c23	-0.0922502	-0.40777	-0.524596	-0.420822
Hace1	comp464211_c21	0.140199	0.178955	0.109355	0.109462
Fcho2	comp462002_c18	0.334067	-0.0316103	-0.252922	-0.337821
D14Abb1e	comp464120_c36	-0.0719802	-0.0924045	-0.196905	-0.0545165
	comp463675_c22	0.623377	0.333657	0.169882	0.056512
Mga	comp462856_c1	-0.453222	-0.262871	-0.17679	-0.227842
Eepd1	comp456778_c21	-0.242274	-0.215884	-0.615139	-0.814135
Usp19	comp460436_c8	0.476288	0.213307	0.230233	0.192551
Rbm16	comp463229_c4	-0.123602	-0.14494	-0.138639	-0.0774165
Fermt3	comp458818_c5	3.02486	1.91145	1.44109	1.10925
Frmd3	comp456360_c4	-2.40497	-2.35308	-2.18677	-2.3798
Mib2	comp461754_c2	-0.837335	-0.336738	0.0227064	-0.00229282
Tmem127	comp458645_c24	0.62062	0.402492	0.404152	0.243027
Pdp1	comp446846_c1	-0.798594	-0.18648	-0.212484	-0.168583
C2396C1Rik	comp462802_c11	0.665895	0.562293	0.402633	0.416449
	comp460190_c2	-0.890699	-0.379905	-1.16914	-1.02762
Xrcc5	comp463406_c5	0.333394	0.00471078	-0.231747	-0.242165
Fam4b	comp460851_c6	0.00446298	0.109672	-0.129909	-0.00174997
Atp1a	comp462064_c19	0.16055	0.438121	0.256679	0.198384
Taf5l	comp462622_c1	0.896545	0.429774	0.394051	0.269956
Trpv2	comp462504_c12	0.812296	0.465296	-0.175417	-0.198936
Fbxl14	comp455534_c2	0.28775	0.325143	0.792456	0.298178
Dcaf15	comp455888_c0	0.648033	0.274332	0.315102	0.238024
Inpp5b	comp464612_c15	-0.00298209	0.343898	0.464483	0.327468
Atg13	comp461223_c16	0.0439817	0.138136	0.118983	-0.000803342
Ranbp1	comp458605_c12	0.212408	0.0228199	-0.0712495	-0.155835
Tm9sf1	comp459856_c1	0.790063	0.645407	0.561279	0.509284
Tgm1	comp463099_c12	0.96051	0.439678	-0.1161	-0.057406
Ankrd44	comp463977_c26	0.580384	0.373929	0.236919	0.158016
U2af2	comp458846_c7	0.830656	0.378322	0.344464	0.313446
Capn2	comp463456_c8	0.537059	0.49549	0.295916	0.163656
Cxxc5	comp453357_c10	-0.789661	-0.162823	-0.0170441	-0.303225
Sclt1	comp463367_c9	-0.200413	-0.325682	-0.170446	-0.0842792
Ptprn	comp434867_c0	2.49362	4.22487	4.32733	4.09552
Ppp1r16b	comp462220_c19	-0.414982	-0.512295	-0.555736	-0.438725
Tmem135	comp461651_c20	-0.356866	-0.357323	-0.291774	-0.34234
Sdk2	comp465102_c5	-0.0238746	1.31655	1.3595	1.12488
Pias2	comp463621_c17	-0.180497	-0.0592956	0.112698	-0.00295662
Atp6v1a	comp461969_c27	1.11498	0.580349	0.28246	0.189316
Pknox1	comp461912_c18	0.78253	0.761205	0.732536	0.557942
Arih2	comp461320_c19	0.302287	0.168311	0.129677	0.0200047
Plxnb1	comp463247_c2	-0.0351074	-0.273692	-0.319935	-0.187024
Ntrk2	comp461939_c7	-0.516654	-1.27245	-1.25682	-1.20931
Kbtbd1	comp458460_c22	-2.64104	-2.00156	-1.99987	-3.00642
Arih1	comp460004_c10	0.357437	0.257194	-0.00598588	-0.020175
Aoc3	comp462766_c11	-0.679496	0.0242516	-0.365353	-1.12701
Shcbp1	comp458310_c5	1.84467	1.16086	1.08015	1.03323
Myst2	comp463399_c7	0.321794	0.116164	0.00141594	-0.101829
Tox4	comp455692_c28	0.347054	0.138945	0.0511469	-0.0599765
Lphn1	comp460747_c8	0.138264	0.600186	0.976139	0.77793
Nmt2	comp463659_c15	0.593484	0.288534	0.191689	0.274121
Pgm2	comp458926_c0	-0.994471	-1.07872	-1.04534	-1.31078
Arntl	comp463569_c6	-0.589857	-0.373458	-0.932916	-0.512777
Solh	comp459417_c6	0.423154	0.591619	0.593526	0.454716
Bptf	comp464734_c29	-0.033426	-0.0607576	-0.0166767	-0.088261
Angpt1	comp451563_c0	-0.734012	-0.0907622	-0.218327	-0.639346
Matn4	comp456547_c18	0.0595107	-0.860186	-0.417584	0.477006
Maoa	comp454459_c2	-0.892634	-1.16256	-1.38875	-1.31171
Aff2	comp450675_c3	-1.17117	-0.401059	0.120496	-0.0702642
Syde1	comp452546_c0	-0.0214935	0.285936	0.432995	0.132323
Aloxe3	comp460338_c6	-0.138816	-0.0654199	-0.549298	-0.529582
Klhl29	comp459389_c1	-1.03351	-1.1808	-0.942628	-1.10567
Prkag2	comp462328_c28	-0.24127	-0.460386	-0.43982	-0.665683
Mcm7	comp458087_c3	1.20994	0.553032	0.624575	0.558435
Oplah	comp463622_c8	-0.305545	-0.725924	-0.905894	-0.737122
Eml4	comp463116_c12	0.109237	0.0202952	-0.133439	-0.163997
Papss2	comp458971_c6	-0.770984	-0.52616	-0.800116	-0.829403
Epha2	comp458149_c1	1.10919	0.163517	-0.204894	-0.108663
Urb2	comp460514_c0	0.719572	0.252084	0.152796	0.156587
Xpnpep2	comp463233_c6	0.991312	0.351176	-0.206434	-0.473568
Wbp11	comp461974_c11	0.292502	-0.0791094	-0.11075	-0.210316
Bbs2	comp461518_c6	-0.203178	-0.23581	-0.315961	-0.154516
Keap1	comp462532_c28	0.240815	0.117511	0.106052	-0.0502967
Papss1	comp460271_c12	0.223377	0.290111	0.306918	0.331622
Runx1t1	comp461907_c40	-1.05133	0.244731	0.944688	1.00225
Hmha1	comp462757_c0	2.40434	1.33709	0.990601	0.613675
Pkhd1l1	comp450827_c3	-1.3216	-0.712987	-1.05056	-1.22079
Men1	comp461336_c4	0.359304	0.324088	0.433363	0.194329
Arhgef7	comp463738_c9	0.444686	0.3946	0.467158	0.301088
Sema7a	comp457878_c21	0.390241	0.12475	-0.156917	-0.462478
Ubtf	comp460459_c4	0.137653	0.0152913	0.151033	0.0130279
Fndc3a	comp463936_c14	-0.170755	-0.0214683	-0.0658379	-0.0816844
Mllt1	comp463665_c5	0.0774671	0.208186	0.286428	0.20871
Tgm5	comp459303_c0	0.950279	0.356398	-0.273864	-0.563325
Col9a1	comp460706_c6	-1.27655	-0.555041	0.361402	1.50766
Dock9	comp463071_c24	-0.661557	-0.751827	-0.842134	-0.912827
Mkl1	comp458105_c12	0.806826	0.697499	0.897439	0.490668
Wdr43	comp462940_c6	0.752784	0.211563	0.0937562	0.0463446
Sox11	comp459939_c1	0.487522	2.64447	2.62745	2.53328
543411K18Rik	comp464538_c17	0.0172507	0.134829	-0.0524516	-0.110181
Heatr2	comp461681_c3	0.825104	0.480454	0.298658	0.38628
Trpc1	comp458667_c12	-0.548583	-0.09638	-0.121459	-0.252875
Tnn	comp459174_c11	-0.459634	3.24151	3.07915	2.97991
Jmjd1c	comp464217_c16	0.303941	-0.076937	-0.10681	-0.14215
611F5Rik	comp464187_c0	-0.198224	0.0959471	0.118876	0.156714
Baz1a	comp464399_c5	1.36578	0.760245	0.735604	0.667
Tmem62	comp462391_c20	-0.351045	-0.267989	-0.55573	-0.549077
Gucy1b3	comp453290_c1	-0.235539	-0.241222	-0.390385	-0.817546
Prdm2	comp464686_c2	0.177528	0.26282	0.366802	0.177297
Mthfr	comp458809_c2	-0.0731551	0.0639604	0.128184	-0.0482492
Zbtb44	comp457119_c36	-0.284849	-0.487644	-0.503995	-0.533345
Glb1l	comp459207_c0	-0.0913605	0.185169	0.335055	0.292284
Fam178a	comp459318_c27	-0.155332	-0.290913	-0.102189	-0.284481
Uba6	comp464690_c27	0.735355	0.125221	-0.0294981	-0.0716699
Mad1l1	comp463204_c8	0.884913	0.536582	0.595908	0.303732
Ino8d	comp464300_c4	0.348523	0.169989	0.133868	0.0129065
Mios	comp465193_c15	-0.215515	0.105158	0.0864348	-0.0240794
Dmwd	comp459365_c6	-0.0157391	0.0276509	0.412219	0.0810649
Tead1	comp460957_c15	-0.31223	0.132595	0.24472	0.137539
Slc35f5	comp462674_c12	0.422956	0.341574	0.0559619	0.0913106
Foxn1	comp457449_c4	0.726936	0.136154	-0.405278	-0.243342
Pomgnt1	comp462276_c1	0.181263	0.0561636	0.0465701	-0.0926434
Cars	comp463352_c2	0.654924	0.344786	0.134039	0.0528801
Crtc1	comp460316_c1	0.00511809	0.245499	0.540884	0.511418
Glt25d2	comp458334_c0	-0.909494	-0.17406	0.0860157	-0.0909626
Fermt1	comp463084_c0	1.02857	-0.227094	-0.419252	-0.349352
Ncapd3	comp464777_c0	0.376088	0.0940822	0.243917	0.232359
Vps39	comp463931_c15	0.227667	0.139188	0.136056	0.0497268
Kif2c	comp461944_c0	2.35569	1.57613	1.39064	1.43755
Gas6	comp454929_c0	-0.340606	0.199	0.306625	-0.032552
Chtf8	comp426774_c0	0.89017	0.364116	0.368096	0.29761
Ilf3	comp462650_c17	0.22185	0.224812	0.436351	0.393808
Atg4b	comp458606_c13	0.27271	0.208685	0.174213	0.0809377
Rif1	comp464960_c8	-0.106116	-0.347277	-0.279885	-0.319812
Polr1a	comp464823_c10	0.853009	0.645783	0.587033	0.440701
1781L11Rik	comp458488_c17	-0.0647509	0.0160973	-0.0758619	-0.0938844
Klhl24	comp458235_c28	-0.600416	-0.413214	-0.363071	-0.376289
Tardbp	comp457923_c41	0.573324	0.322042	0.306413	0.289944
Mcoln1	comp460952_c14	0.249215	0.0781179	0.0299234	0.0818405
Tcf12	comp460662_c15	0.0963133	0.480701	0.644867	0.59756
Tcf3	comp463849_c6	0.369825	0.585198	0.696072	0.649964
Amot	comp456546_c5	-1.98194	-1.11505	-0.52016	-0.862637
Tmem183a	comp454254_c9	0.429257	0.13796	0.0279211	0.0302279
2781O15Rik	comp453719_c21	0.676302	0.924446	1.12975	0.906021
Larp1b	comp460431_c26	-0.492652	-0.912107	-1.43335	-1.131
Mknk2	comp457643_c5	0.856643	0.340676	0.286877	-0.0113684
Man2a1	comp464296_c12	0.621081	0.649045	0.544477	0.32749
Ahnak	comp461351_c9	-0.0728408	-0.232819	-0.42005	-0.54447
Bbs7	comp462846_c3	-0.567457	-0.241648	-0.155662	-0.170083
Hiat1	comp461181_c7	0.21301	-0.0112107	-0.14552	-0.141527
Scnn1b	comp385963_c0	0.92768	0.739581	0.172746	0.177951
Tmco7	comp463398_c22	0.378658	0.154164	-0.000727804	0.0963061
Amotl1	comp461961_c19	-0.341955	-0.206562	-0.245608	-0.454336
Thsd4	comp461614_c21	-0.437517	-0.406841	-0.600474	-0.989126
Slc45a3	comp455444_c10	-0.328282	-0.131367	-0.487926	-0.667522
Nup85	comp460441_c10	1.09374	0.60818	0.566558	0.593524
Tbc1d9	comp463529_c23	1.42712	1.01522	1.07314	0.715574
F8	comp449439_c6	-0.0942582	0.404823	-0.123424	-0.642434
Acss3	comp454059_c5	-0.868733	-0.532691	-0.588782	-1.02133
Gtpbp1	comp456101_c26	0.415255	0.390943	0.18785	0.237521
Smg8	comp429645_c2	0.0757648	-0.280957	-0.315866	-0.277425
Gm68	comp452933_c5	-0.395388	-0.521901	-0.499735	-0.557238
Atp1a2	comp461865_c18	-2.75777	-2.86877	-3.08983	-3.8075
Itgae	comp456219_c25	0.0562642	0.219628	0.403584	0.124636
Son	comp460924_c9	0.43617	0.251312	0.20764	0.0921225
Atl3	comp461910_c26	0.230731	0.00580995	-0.160161	-0.151273
Dnaja1	comp455813_c23	0.418584	0.137007	-0.160399	-0.107399
Xpc	comp459350_c4	0.132309	0.12015	0.0974941	0.0636247
Eif4g2	comp464876_c11	0.787351	0.372304	0.304207	0.159227
Dbn1	comp458839_c0	0.412699	2.16415	2.34612	1.91263
Ankrd32	comp464045_c16	0.12484	-0.113682	-0.0531081	0.0211402
Snx18	comp458144_c27	0.760475	0.110502	0.0628954	-0.109351
Pdia3	comp452795_c2	1.15613	1.02092	0.947723	0.732971
Col9a3	comp462406_c2	-1.77989	-1.78855	-1.04804	-0.733784
Rcc2	comp460332_c23	1.21643	0.647607	0.627584	0.675228
Mll5	comp457830_c1	-1.04667	-0.440873	0.0159992	-0.395499
Vasp	comp460709_c28	1.84017	1.13868	0.972986	0.560277
Bms1	comp461324_c0	0.772082	0.444644	0.289705	0.117386
Mef2c	comp459382_c27	-1.46205	-1.16009	-1.17591	-1.74924
Eftud1	comp464147_c25	0.609055	0.396396	0.130383	0.26817
Espl1	comp463702_c3	2.44108	1.59082	1.79116	1.50298
Wiz	comp456719_c8	0.597627	0.43145	0.524216	0.389126
Ddr1	comp463358_c5	-0.139303	-0.137838	-0.344047	-0.372588
Cgn	comp461648_c0	-0.964605	-0.446787	-0.698525	-0.595663
Rps6ka5	comp463728_c29	-0.190832	-0.378558	-0.166966	-0.238978
Mark4	comp463141_c20	0.622777	0.293743	0.464556	0.166963
Fzd4	comp457019_c11	-1.49409	-1.78369	-1.37219	-1.97725
Mms19	comp463463_c1	0.156032	0.0728396	0.121532	0.127323
Sp3	comp453954_c26	-0.061329	-0.125696	-0.167453	-0.114245
Caprin1	comp463531_c22	0.447416	0.285303	0.148844	0.0786459
Stat6	comp464180_c17	0.852044	0.302713	0.0176848	-0.172595
Zbtb41	comp458173_c10	-0.178331	-0.280857	-0.307927	-0.273039
Trim41	comp456111_c5	0.393929	0.192431	0.0422948	0.0887391
Rap1a	comp455615_c13	0.38691	0.09097	-0.111155	-0.181547
aatyk3	comp456304_c5	0.165758	0.670831	1.20406	1.10781
Nap1l4	comp458088_c5	0.421385	0.301537	0.170216	0.0571335
Kif14	comp462534_c4	1.40962	0.890131	0.84793	0.751616
Gm962	comp365376_c2	1.52782	1.12453	0.813695	0.760441
Ybx1	comp458030_c24	0.34342	-0.197495	-0.244647	-0.439887
BC24479	comp453041_c17	-0.0383295	-0.0357417	-0.034879	-0.187275
Ankk1	comp459445_c7	1.38189	1.69418	0.818679	1.02169
Itsn2	comp464971_c19	0.514578	-0.0187297	-0.373785	-0.358599
Ltbp2	comp464076_c12	0.597871	1.35694	0.958002	0.571158
Naa15	comp461209_c27	1.0653	0.539904	0.293384	0.188658
Pparg	comp461317_c4	-1.01279	-1.57559	-1.58699	-1.48355
Ankrd27	comp464949_c15	-0.021377	0.113745	0.260398	0.212759
Mcm5	comp461597_c1	1.79813	0.732137	0.761578	0.801776
Pak3	comp462679_c22	-1.51949	-1.01613	-1.0993	-1.07448
Ofd1	comp464028_c10	0.112638	-0.148514	-0.149912	-0.222451
Urb1	comp463550_c0	0.299454	-0.00705336	0.0349312	0.114291
Bcar3	comp459986_c7	0.184655	-0.0663765	-0.167635	-0.40511
Reck	comp459632_c8	-1.05366	-0.728952	-0.376497	-0.367386
Usp39	comp461365_c12	0.417694	0.19134	0.0817582	0.0901268
Map3k1	comp456119_c4	-0.0934677	0.0252976	0.483994	0.274271
Fes	comp460912_c35	1.13196	0.847599	0.878686	0.493855
Zmpste24	comp461014_c17	0.609102	0.149257	0.015344	-0.0486431
Ntrk3	comp446256_c1	-1.86983	-0.896974	-0.695111	-0.74904
Nuak1	comp462398_c1	-0.627251	0.416257	0.237536	0.0452074
Neurl4	comp464382_c11	0.205996	0.342106	0.32502	0.112929
Slc6a19	comp462450_c9	0.741962	0.854784	0.0605348	0.189137
Phf3	comp461919_c3	-0.0409007	-0.0518926	-0.0536152	-0.0772664
Zfp131	comp458872_c5	0.239475	-0.0163084	-0.0635811	-0.0443864
Sympk	comp462950_c2	0.628051	0.443363	0.437654	0.324037
Dlat	comp461022_c3	0.15082	-0.307268	-0.338856	-0.502441
	comp462902_c0	0.445242	0.260887	0.165551	0.059704
Pcnxl3	comp456351_c7	0.544099	0.362061	0.40918	0.186055
Stk4	comp459331_c20	0.184205	0.106901	-0.111126	-0.129313
Fbxw7	comp461675_c29	0.0351616	-0.301576	-0.272985	-0.388785
Klhl31	comp455106_c20	-1.97618	-0.648169	-0.815177	-2.20488
Adarb1	comp463217_c0	0.294031	0.146054	-0.313445	-0.434932
Nmt1	comp456446_c14	0.456828	0.137502	0.0554725	-0.141467
Rhot2	comp459954_c0	0.796197	0.284897	0.21666	0.184197
Pgm5	comp453113_c20	-1.42743	-0.493653	-0.732886	-1.45335
Tbc1d9b	comp463290_c14	0.42496	0.363908	0.417167	0.236732
Ppp2r5e	comp463413_c16	0.167492	-0.0347882	-0.03269	-0.126395
Nudcd1	comp461407_c3	-0.534495	-0.561115	-0.631593	-0.61575
Col9a2	comp461134_c28	0.798921	1.47531	1.29677	1.04157
Slc2a2	comp457979_c19	0.153742	-0.310729	-0.304011	-0.453032
Mgat4b	comp457451_c1	0.327269	0.0194292	-0.128899	-0.25736
Arhgap31	comp460877_c8	0.303278	0.37244	0.249663	-0.0428171
Limk1	comp461752_c13	0.94205	1.05269	1.1034	0.691063
Inpp5f	comp463869_c13	-0.0373876	-0.200008	-0.279771	-0.383049
F5	comp458458_c15	0.926355	0.576193	0.596802	0.216961
Kcnc4	comp457618_c24	-0.0147427	-0.355813	-0.59674	-0.618037
Fam123b	comp411862_c0	0.000427551	0.139568	0.511388	0.127802
Ptpdc1	comp464184_c36	-0.808108	-0.510449	-0.371371	-0.36269
Dyrk1a	comp461029_c24	0.185403	0.0331276	-0.0142688	-0.124642
Tshz2	comp456763_c0	-0.752984	-0.429704	-0.657843	-0.624943
Gm12824	comp457644_c8	-0.372509	-0.417829	-0.543006	-0.715713
Zfp73	comp451453_c1	-0.294752	-0.349173	-0.301943	-0.622142
Scaper	comp464937_c24	-0.648567	-0.493745	-0.531328	-0.53862
Cdk13	comp464413_c3	0.128234	-0.0788238	-0.101325	-0.114941
Braf	comp461475_c33	0.383327	0.192739	0.0220116	0.0188938
Pcbp1	comp458953_c3	0.566609	0.189323	0.224078	0.0797671
Gdpd5	comp461570_c1	1.03839	0.353625	0.256832	-0.0634599
Cdh5	comp458849_c5	0.170733	0.148426	0.00131572	-0.717924
Gli3	comp462926_c31	0.212527	0.878788	1.3615	1.10502
Ddx41	comp461202_c10	0.864686	0.491953	0.361994	0.312665
Lats2	comp458288_c18	-0.0332785	-0.143198	-0.235556	-0.537594
Eif3l	comp457848_c3	0.608706	0.274541	0.102725	0.0558334
Zbtb17	comp456571_c0	0.552291	0.306009	0.366457	0.2866
Npat	comp463910_c25	0.328246	0.188393	0.226966	0.135077
Brip1	comp464376_c0	0.145892	-0.139494	0.0565828	0.169606
Osbpl1	comp457215_c12	0.212272	0.640593	0.612243	0.419791
Inpp4a	comp462808_c9	0.653722	0.0284684	0.148102	-0.0937839
Fbxo38	comp462046_c26	-0.00492015	0.00234417	-0.0781393	-0.0809172
Trpv4	comp461397_c17	-1.00023	-1.05137	-1.12924	-0.862949
Mkrn1	comp456114_c34	0.868371	0.551894	0.485492	0.352508
Trim29	comp455116_c1	0.259393	-0.134002	-0.712991	-0.64649
Ints6	comp465117_c1	-0.0888142	-0.249277	-0.240604	-0.252845
Fbxl7	comp454531_c15	-0.811957	0.337504	1.11879	1.0909
Zfp746	comp458015_c6	0.275727	0.264357	0.391578	0.185246
Nsf	comp464430_c14	0.473028	0.392668	0.306106	0.288517
Pigo	comp453787_c0	1.03656	0.814669	0.793255	0.646603
Amotl2	comp459956_c1	0.203503	0.245674	0.241502	0.106272
Senp1	comp464325_c29	0.337741	0.134575	0.113245	0.0119362
Fem1a	comp455789_c1	-0.040777	-0.297906	-0.400988	-0.563126
G3bp2	comp458651_c2	0.601207	0.131902	0.0374026	0.0246478
Get4	comp459345_c12	0.760943	0.515392	0.292886	0.255424
Pla2g6	comp457361_c0	-0.373666	-0.673374	-0.0626503	-0.316785
Synj1	comp464506_c8	0.746241	0.440585	0.187575	0.078423
Prrc2b	comp462215_c7	0.126516	0.116579	0.311322	0.154867
Hdac5	comp464421_c11	-0.264652	-0.273916	-0.237793	-0.329816
Pygb	comp454550_c2	-0.60854	-0.744554	-0.636338	-0.595662
Nfia	comp463717_c2	-0.629675	-0.445072	-0.122995	-0.309171
Tmem132b	comp457814_c7	-2.07354	-2.17638	-1.99317	-1.71018
Sec61a1	comp456253_c3	1.42124	1.29579	1.10085	0.933021
	comp450355_c0	-2.30005	-2.99628	-2.37926	-2.5635
Slc26a9	comp462641_c25	1.94443	1.17234	0.371343	-0.00036941
Arid4b	comp463465_c16	0.151814	0.105174	0.167269	0.0940151
Pcca	comp463481_c15	-0.715379	-0.478291	-0.532296	-0.458492
Trappc1	comp463562_c1	0.213945	-0.00127952	-0.129452	-0.144337
Slc25a25	comp458887_c8	0.558784	0.172478	0.0370238	0.187496
Ank2	comp465080_c9	-1.44541	-0.760813	-0.270708	-0.440256
Rusc2	comp460366_c2	-0.591551	-0.176882	-0.0319203	-0.414732
Med26	comp461897_c26	0.5106	0.226439	0.377239	0.229617
Atl2	comp463818_c19	-0.263716	-0.314551	-0.396756	-0.369946
Tnks1bp1	comp460038_c16	0.398195	0.339807	0.34775	0.126155
Rsbn1	comp460800_c13	0.081547	-0.146145	-0.150555	-0.211631
Chst2	comp455178_c5	1.21443	1.82714	2.36727	2.35824
Unkl	comp460086_c9	0.122429	-0.090543	-0.196057	-0.168508
Ncapg	comp462306_c4	1.48765	0.775643	0.87058	0.906685
Usp38	comp461627_c20	0.116086	-0.00640187	-0.138866	-0.229055
Gtpbp2	comp458559_c0	0.315274	0.500575	0.393713	0.317421
Dym	comp462702_c3	-0.243141	-0.277862	-0.302199	-0.499053
Dnmt3b	comp462843_c9	1.47528	1.01105	1.01428	1.00913
Rpn2	comp459227_c8	1.10241	0.875094	0.653039	0.542895
Has3	comp100473_c0	3.43121	1.08539	0.887772	1.42584
Gpr124	comp463195_c21	-0.0798642	0.190767	0.658518	0.593678
Eya4	comp450096_c0	-1.96113	-0.919766	-0.752895	-1.59365
Hif1a	comp461729_c13	1.22954	0.32063	0.0622819	-0.0605441
Bend5	comp454239_c1	-0.513387	0.271291	1.471	1.75013
Usp42	comp460330_c25	0.069707	-0.0277806	0.0304883	0.0376457
Galntl1	comp462919_c16	-0.494323	1.48836	1.8504	1.29821
	comp450605_c18	0.56518	0.270678	0.442107	0.00928809
Shb	comp456610_c14	0.552552	0.578417	0.354911	0.164604
Tmem21	comp459072_c5	0.270448	-0.0691659	0.178572	-0.0312283
Klhl13	comp462387_c7	-0.809936	-0.185278	-0.0460995	-0.635774
Atad2	comp464581_c17	0.627146	0.0420671	0.0664431	0.172854
Pias3	comp458798_c6	0.125915	0.398185	0.599861	0.410989
Fbxl4	comp455997_c0	-0.327076	-0.231457	-0.341475	-0.354899
Ttc26	comp455245_c8	-0.415664	0.144322	-0.106444	0.315674
Plekha8	comp461411_c15	0.0488197	0.199317	0.37631	0.245415
Mrvi1	comp460107_c19	-0.543703	-0.223708	-0.214559	-0.857118
Ly75	comp463934_c0	1.27268	1.05754	0.726393	0.512486
Dock6	comp465119_c13	0.109001	0.161251	-0.0426719	-0.0546324
Alox12b	comp460092_c1	0.136303	-0.0730975	-0.623968	-0.571185
Actr8	comp460300_c7	0.0386128	-0.135281	-0.143685	-0.252653
Il16	comp458816_c26	0.466101	0.00460607	0.464402	0.415674
Fam63b	comp457879_c13	-0.283379	-0.364189	-0.397117	-0.43596
Meis1	comp463085_c23	-0.488883	0.276421	0.640656	0.819757
Cpsf3	comp459982_c4	0.666506	0.069273	-0.0146587	0.0792965
Wdr2b	comp459139_c12	0.183768	0.0327716	-0.071569	-0.177241
Fam11b	comp454565_c3	0.290931	0.355469	0.720312	0.509706
Ptprz1	comp464980_c12	1.53932	0.179235	0.106002	0.172329
Cbfa2t2	comp460105_c10	-0.0709015	0.0472157	0.301075	0.327884
Ptpn6	comp458052_c1	1.91559	0.653663	0.45683	0.20087
Abcc9	comp464805_c18	-0.493981	-0.524801	-0.619177	-1.02108
Tubgcp2	comp462081_c30	0.210684	-0.10747	-0.0713717	-0.145343
Stxbp2	comp460141_c7	0.627132	0.013704	-0.257532	-0.153612
Arhgap18	comp462749_c15	0.14659	0.145248	0.12215	0.114429
Pfkm	comp459583_c1	-2.25639	-2.08195	-1.97542	-2.23647
Tgm2	comp458938_c1	1.4534	1.17424	0.691496	-0.266342
	comp462295_c3	0.486527	0.273097	0.194121	0.14581
Stk1	comp464265_c6	0.567222	0.342181	0.138232	-0.14559
Tm9sf2	comp462803_c5	0.276697	0.234415	0.200076	0.0323436
Slc7a2	comp461495_c2	0.0226699	-0.0540781	0.118902	0.0294023
Vasn	comp465725_c0	0.69473	0.645193	0.543197	0.369489
Kif2a	comp463938_c7	-0.0411813	0.0339933	0.0344311	-0.0199958
Gpd2	comp463876_c29	0.254254	-0.221816	-0.276509	-0.506135
Slc7a11	comp460564_c3	4.50744	0.884429	0.0349062	0.132876
Gpam	comp463650_c3	-0.585228	-0.646742	-0.855041	-0.762403
Arhgap29	comp463973_c10	-0.849703	-0.656844	-0.652031	-0.758467
	comp465201_c1	0.280664	0.46647	0.736226	0.44298
Heca	comp458510_c29	0.425068	0.178884	-0.068559	-0.0897186
Ptbp2	comp459081_c9	-0.431826	0.0645449	0.278738	0.22289
Ctnnal1	comp462459_c24	-1.23741	-0.885884	-1.223	-0.971558
Pvrl1	comp459323_c6	1.08713	0.284617	0.170451	0.039966
Lmf2	comp455736_c0	0.746375	0.658318	0.469927	0.152624
Sim2	comp460017_c16	-0.811635	-0.524166	-0.817604	0.331421
Mapkap1	comp465231_c31	0.196524	0.131253	0.121237	0.0945561
Gnb2	comp460757_c9	0.854357	0.687874	0.677717	0.419297
EF437385	comp455485_c32	0.401233	-0.0903197	-0.288194	-0.337962
Map4k3	comp463616_c14	-0.520353	-0.507314	-0.635604	-0.579287
492251C3Rik	comp464297_c21	-0.092496	-0.402667	-0.173174	-0.103455
Pdzrn4	comp451241_c1	-2.16198	-2.30798	-1.73975	-1.92034
Fam16a2	comp460807_c27	0.323217	0.0714512	0.208295	0.12375
Arpp21	comp459268_c9	-1.80205	-0.70414	-0.836082	-2.13869
Lcp1	comp462393_c30	2.42441	1.08744	0.710193	0.256487
Zbtb5	comp462194_c27	0.0521215	0.0773808	0.138911	0.107081
Sbno2	comp464054_c4	0.781284	0.385303	-0.0140113	-0.121171
Mfi2	comp463438_c0	-0.931164	-1.37042	-1.66617	-1.9644
[truncated: 12,736 more rows]

## Sheet: 2. Matrisome matches
Gene Symbol	Gene Name		Core matrisome - collagens	Gene name	D5 Fold	d10 fold	d15 fold		Core matrisome - ECM glycoproteins	Gene name	D5 Fold	d10 fold	d15 fold		Core matrisome - Proteoglycans	Gene name	D5 Fold	d10 fold	d15 fold		Matrisome associated - ECM affiliated	Gene name	D5 Fold	D10 fold	d15 fold		Matrisome associated - secreted factors	Gene name	D5 Fold	D10 fold	d15 fold		Matrisome associated - regulators	Gene name	D5 Fold	D10 fold	d15 fold
5430419D17Rik	RIKEN cDNA 5430419D17 gene		33	#N/A					Wisp3	WNT1 inducible signaling pathway protein 3	-7.8346	-8.05495	-8.01284		Srgn	serglycin	4.47657	1.88327	1.18642		Lgals3	lectin, galactose binding, soluble 3	-1.99018	0.172155	-4.38699		Shh	sonic hedgehog	6.79556	6.02133	8.90294		Adamdec1	ADAM-like, decysin 1	10.1697	9.84683	8.62281
Abi3bp	ABI gene family, member 3 (NESH) binding protein		Col11a1	collagen, type XI, alpha 1	-0.726796	0.789964	1.30382		Tnr	tenascin R	-7.40455	-1.65271	-0.950052		Prg4	proteoglycan 4 (megakaryocyte stimulating factor, articular superficial zone protein)	2.66787	4.25556	2.8815		Lgals12	lectin, galactose binding, soluble 12	-2.43809	-1.94125	-2.55605		Tchhl1	trichohyalin-like 1	0	0	0		Mmp13	matrix metallopeptidase 13	6.54077	7.22953	6.1082
Adipoq	adiponectin, C1Q and collagen domain containing		Col12a1	collagen, type XII, alpha 1	0.566775	1.86565	1.74314		Vwa3b	von Willebrand factor A domain containing 3B	-5.97959	-6.19677	-6.15555		Vcan	versican	2.41064	1.31075	1.71433		Anxa13	annexin A13	-4.09531	-2.92449	-3.44798		Il1f6	interleukin 1 family, member 6	8.40885	7.65321	5.26205		Tgm4	transglutaminase 4 (prostate)	7.26048	6.86066	0
Aebp1	AE binding protein 1		Col13a1	collagen, type XIII, alpha 1	0.11875	0.0680329	-0.419543		Oit3	oncoprotein induced transcript 3	-4.73937	1.45874	2.71235		Spock3	sparc/osteonectin, cwcv and kazal-like domains proteoglycan 3	0.469189	4.28495	2.56493		C1qtnf9	C1q and tumor necrosis factor related protein 9	-0.111219	-2.93526	-2.42869		Il24	interleukin 24	13.2855	9.20982	7.78893		Mmp9	matrix metallopeptidase 9	4.86926	4.8571	3.55368
Agrn	agrin		Col14a1	collagen, type XIV, alpha 1	-0.695602	0.86316	1.37476		Nell2	NEL-like 2 (chicken)	-3.45632	-0.675371	0.0902123		Bgn	biglycan	0.357767	2.03377	1.94937		Clec3a	C-type lectin domain family 3, member a	-1.84775	-2.03216	-1.9853		Fgf23	fibroblast growth factor 23	10.3204	8.98371	6.94082		Mmp11	matrix metallopeptidase 11	0.410755	4.16329	4.50666
Ambn	ameloblastin		Col15a1	collagen, type XV, alpha 1	-0.0567304	0.538757	0.584812		Ntng2	netrin G2	-2.54515	-2.42797	-1.97645		Hapln3	hyaluronan and proteoglycan link protein 3	0.297281	1.91417	2.23387		Sema3d	sema domain, immunoglobulin domain (Ig), short basic domain, secreted, (semaphorin) 3D	-2.51769	-1.99202	-2.3169		Cxcl13	chemokine (C-X-C motif) ligand 13	9.49287	7.81935	7.52187		Mmp3	matrix metallopeptidase 3	5.84144	4.03898	2.36779
Amelx	amelogenin X chromosome		Col16a1	collagen, type XVI, alpha 1	-0.0262898	0.981392	1.32127		Adipoq	adiponectin, C1Q and collagen domain containing	-2.40755	-2.73772	-3.01662		Hspg2	perlecan (heparan sulfate proteoglycan 2)	0.225905	1.67652	1.86288		Anxa8	annexin A8	-0.140042	-0.734769	-1.23668		Fasl	Fas ligand (TNF superfamily, member 6)	7.25875	0	0		P4ha3	procollagen-proline, 2-oxoglutarate 4-dioxygenase (proline 4-hydroxylase), alpha polypeptide III	1.95803	4.02723	4.22165
AW551984	expressed sequence AW551984		Col17a1	collagen, type XVII, alpha 1	0.119998	-0.370181	-0.678		Vit	vitrin	-2.00412	-1.67582	-2.22524		Podn	podocan	0.0751384	0.517348	0.845351		Muc15	mucin 15	-0.688516	-0.897472	-1.10739		Crnn	cornulin	1.02436	0.487052	1.68489		Mmp12	matrix metallopeptidase 12	1.56254	3.65479	3.03672
Bglap2	bone gamma-carboxyglutamate protein 2		Col18a1	collagen, type XVIII, alpha 1	1.74256	2.53354	2.37836		Mfap5	microfibrillar associated protein 5	-1.94884	0.38432	0.409721		Ncan	neurocan	0	4.99613	5.95252		C1qtnf4	C1q and tumor necrosis factor related protein 4	-0.333835	-0.768867	-1.06633		Il1b	interleukin 1 beta	10.2562	5.59692	3.2054		Serpinb9	serine (or cysteine) peptidase inhibitor, clade B, member 9	4.58022	3.50848	2.21157
Bglap3	bone gamma-carboxyglutamate protein, related sequence 1		Col19a1	collagen, type XIX, alpha 1	-1.84198	1.23605	1.47741		Fndc1	fibronectin type III domain containing 1	-1.94557	-0.821415	-0.00180897		Fmod	fibromodulin	-0.0993649	0.542978	0.537903		Sema3c	sema domain, immunoglobulin domain (Ig), short basic domain, secreted, (semaphorin) 3C	-0.136263	-0.574849	-0.65515		Scube2	signal peptide, CUB domain, EGF-like 2	-0.0789095	3.45425	3.45211		Adamts19	a disintegrin-like and metallopeptidase (reprolysin type) with thrombospondin type 1 motif, 19	-0.781545	3.45932	4.82565
Bmper	BMP-binding endothelial regulator		Col1a1	collagen, type I, alpha 1	-0.576396	2.07861	2.95742		Sparcl1	SPARC-like 1	-1.8561	-0.514544	-0.14615		Hapln1	hyaluronan and proteoglycan link protein 1	-0.345347	-1.13252	-1.52369		Clec1a	C-type lectin domain family 1, member a	-0.194123	-0.847353	-1.12329		Wnt2b	wingless related MMTV integration site 2b	0.440483	2.61798	3.02251		Adamts16	a disintegrin-like and metallopeptidase (reprolysin type) with thrombospondin type 1 motif, 16	0.342985	3.11485	3.12835
Bsph1	binder of sperm protein homolog 1		Col1a2	collagen, type I, alpha 2	0.188366	2.51953	3.10572		Lamc3	laminin gamma 3	-1.80167	-1.1887	-0.921401		Dcn	decorin	-0.616533	-0.49635	-0.270415		Plxnb3	plexin B3	-1.47063	-1.89805	-1.44376		Ifne	interferon epsilon	0.125743	2.67665	3.50795		Cela1	chymotrypsin-like elastase family, member 1	3.0292	3.11405	4.33658
Bsph2	RIKEN cDNA 9230107M04 gene		Col22a1	collagen, type XXII, alpha 1	-2.04992	-0.898599	-0.113194		Eln	elastin	-1.7426	-1.12494	-0.556388		Prelp	proline arginine-rich end leucine-rich repeat	-0.707416	-0.523692	-0.535729		Clec2d	C-type lectin domain family 2, member d	-0.287936	-0.561864	-0.925405		Ptn	pleiotrophin	0.343919	2.66042	2.84092		Tll2	tolloid-like 2	2.9371	3.0788	2.57928
Cdcp2	CUB domain containing protein 2		Col24a1	collagen, type XXIV, alpha 1	-1.13821	-0.961753	-0.592788		Cilp	cartilage intermediate layer protein, nucleotide pyrophosphohydrolase	-1.70168	-0.337593	0.0138423		Acan	aggrecan	-0.981071	-0.745749	-0.763079		Cspg4	chondroitin sulfate proteoglycan 4	-0.474179	-0.600604	-0.815853		Mdk	midkine	-0.151535	1.77621	2.26393		Serpine1	serine (or cysteine) peptidase inhibitor, clade E, member 1	3.96291	3.06447	1.63177
Cilp	cartilage intermediate layer protein, nucleotide pyrophosphohydrolase		Col27a1	collagen, type XXVII, alpha 1	-0.376761	0.680481	0.977222		Rspo3	R-spondin 3 homolog (Xenopus laevis)	-1.65395	-1.51428	-0.95639		Epyc	epiphycan	-1.31917	-1.65705	-1.80849		C1ql1	complement component 1, q subcomponent-like 1	0.18833	-0.29219	-0.0663101		Tnfsf14	tumor necrosis factor (ligand) superfamily, member 14	3.3603	2.66131	2.75949		Slpi	secretory leukocyte peptidase inhibitor	6.43664	2.99798	2.49665
Cilp2	cartilage intermediate layer protein 2		Col28a1	collagen, type XXVIII, alpha 1	-0.699108	-0.737349	0.110292		Ltbp4	latent transforming growth factor beta binding protein 4	-1.62429	-1.55686	-1.47521		Ogn	osteoglycin	-1.408	-0.646366	0.316547		Clec14a	C-type lectin domain family 14, member a	-0.490938	-0.150956	-0.138267		Ccl7	chemokine (C-C motif) ligand 7	3.81144	3.00108	2.47221		Tgm3	transglutaminase 3, E polypeptide	4.11607	2.81638	2.4032
Coch	coagulation factor C homolog (Limulus polyphemus)		Col2a1	collagen, type II, alpha 1	-2.15283	-1.63525	-1.4446		Cilp2	cartilage intermediate layer protein 2	-1.59389	-1.47152	-0.385071		Aspn	asporin	-1.46707	0.486532	0.781295		Sema3e	sema domain, immunoglobulin domain (Ig), short basic domain, secreted, (semaphorin) 3E	-1.02344	-1.41066	-1.19499		Tgfb3	transforming growth factor, beta 3	1.37829	2.32	2.43464		Ctse	cathepsin E	6.63637	2.74055	1.03168
Colq	collagen-like tail subunit (single strand of homotrimer) of asymmetric acetylcholinesterase		Col3a1	collagen, type III, alpha 1	0.26294	2.6981	2.84903		Ibsp	integrin binding sialoprotein	-1.53359	-0.835736	0.363175		Esm1	endothelial cell-specific molecule 1	-1.50497	-0.161876	-0.554303		Cspg5	chondroitin sulfate proteoglycan 5	1.00751	0.405528	-0.118186		Fstl1	follistatin-like 1	0.633118	2.02116	2.13546		Mmp19	matrix metallopeptidase 19	2.13263	2.69889	2.67181
Comp	cartilage oligomeric matrix protein		Col4a1	collagen, type IV, alpha 1	1.04327	1.30463	1.24581		Lgi1	leucine-rich repeat LGI family, member 1	-1.53131	-0.937259	-1.69221		Chadl	chondroadherin-like	-1.64972	-1.08103	-0.657338		Emcn	endomucin	-0.337747	0.0965986	-0.338196		Il11	interleukin 11	4.32383	3.52453	2.39894		Adam12	a disintegrin and metallopeptidase domain 12 (meltrin alpha)	1.03608	2.67742	2.81914
Creld1	cysteine-rich with EGF-like domains 1		Col4a2	collagen, type IV, alpha 2	0.886461	1.42623	1.36931		Gldn	gliomedin	-1.48483	-2.15549	-1.75608		Spock2	sparc/osteonectin, cwcv and kazal-like domains proteoglycan 2	-1.82224	-1.28874	-1.39387		Plxdc2	plexin domain containing 2	-0.598523	-0.338855	-0.575399		Pdgfc	platelet-derived growth factor, C polypeptide	0.60696	1.96826	2.17534		Serpinb3a	serine (or cysteine) peptidase inhibitor, clade B (ovalbumin), member 3A	4.57869	2.62014	4.71419
Creld2	cysteine-rich with EGF-like domains 2		Col4a3	collagen, type IV, alpha 3	-1.71715	-1.80207	-0.384034		Ntn4	netrin 4	-1.42653	-1.1975	-1.35019		Omd	osteomodulin	-1.84742	-2.05963	-1.10853		Muc1	mucin 1, transmembrane	-1.17105	0.0705653	-0.138147		Sfrp2	secreted frizzled-related protein 2	0.561485	2.48826	2.78808		Mmp25	matrix metallopeptidase 25	4.20377	2.42252	2.3263
Crim1	cysteine rich transmembrane BMP regulator 1 (chordin like)		Col4a5	collagen, type IV, alpha 5	-1.31863	-0.701184	-0.480214		Igfbp6	insulin-like growth factor binding protein 6	-1.41902	-0.851869	-0.693008		Chad	chondroadherin	-2.05562	-2.18787	-2.18146		Anxa3	annexin A3	0.547791	0.484693	0.086489		Il6	interleukin 6	4.16436	2.24902	2.28436		Plat	plasminogen activator, tissue	1.23894	2.39867	1.70713
Crispld1	cysteine-rich secretory protein LCCL domain containing 1		Col4a6	collagen, type IV, alpha 6	-1.76734	-1.7472	-1.56882		Matn3	matrilin 3	-1.40733	-1.25113	-0.0418502		Kera	keratocan	-3.03125	-2.54991	-0.509239		Plxna2	plexin A2	-0.00194932	-0.23766	-0.36538		Wnt5a	wingless-related MMTV integration site 5A	0.385025	1.61367	1.58298		Adam23	a disintegrin and metallopeptidase domain 23	0.0571311	2.29472	2.88991
Crispld2	cysteine-rich secretory protein LCCL domain containing 2		Col5a1	collagen, type V, alpha 1	0.549522	3.01435	3.09892		Pcolce2	procollagen C-endopeptidase enhancer 2	-1.36001	-0.406282	-1.20119		Lum	lumican	-3.08888	0.437612	-1.44982		Gpc1	glypican 1	-0.0579319	0.19575	-0.00995079		Scube3	signal peptide, CUB domain, EGF-like 3	-0.776495	0.355855	1.12163		Adamts4	a disintegrin-like and metallopeptidase (reprolysin type) with thrombospondin type 1 motif, 4	1.135	2.21956	1.9728
Ctgf	connective tissue growth factor		Col5a2	collagen, type V, alpha 2	0.994665	3.20164	3.34799		Hmcn2	hemicentin 2	-1.27384	0.477584	0.618043		Impg2	interphotoreceptor matrix proteoglycan 2	-3.15498	-2.96124	-2.61543		Sema7a	sema domain, immunoglobulin domain (Ig), and GPI membrane anchor, (semaphorin) 7A	0.390241	0.12475	-0.156917		Megf6	multiple EGF-like-domains 6	-0.134418	0.43713	1.40153		Timp1	tissue inhibitor of metalloproteinase 1	3.01588	2.18109	1.18129
Cthrc1	collagen triple helix repeat containing 1		Col5a3	collagen, type V, alpha 3	0.916487	2.45779	2.21762		Lama2	laminin, alpha 2	-1.26992	-0.848739	-0.687635		Bcan	brevican	-3.6532	-3.14128	-2.30622		Lgals8	lectin, galactose binding, soluble 8	0.0213576	-0.297267	-0.465248		Lif	leukemia inhibitory factor	2.99911	2.36748	1.97009		Serpinh1	serine (or cysteine) peptidase inhibitor, clade H, member 1	1.12085	2.15296	2.12108
Cyr61	cysteine rich protein 61		Col6a1	collagen, type VI, alpha 1	0.185943	2.36489	2.83191		Ecm2	extracellular matrix protein 2, female organ and adipocyte specific	-1.21142	-0.293195	0.118288		Hapln4	hyaluronan and proteoglycan link protein 4	-5.08342	-0.0371311	1.37904		Sema5b	sema domain, seven thrombospondin repeats (type 1 and type 1-like), transmembrane domain (TM) and short cytoplasmic domain, (semaphorin) 5B	-1.64621	-0.649092	0.0943643		Ccbe1	collagen and calcium binding EGF domains 1	0.379282	1.21824	1.44129		Pamr1	peptidase domain containing associated with muscle regeneration 1	0.614027	2.04411	2.43881
Ddx26b	DEAD/H (Asp-Glu-Ala-Asp/His) box polypeptide 26B		Col6a2	collagen, type VI, alpha 2	0.328004	2.3035	2.51439		Reln	reelin	-1.17624	0.117819	0.289589		Spock1	sparc/osteonectin, cwcv and kazal-like domains proteoglycan 1	-7.09539	-7.31643	-7.27408		Clec2e	C-type lectin domain family 2, member e	0.597687	0.112742	-0.116453		Egfl6	EGF-like-domain, multiple 6	-2.92594	-2.45633	0.487808		Ctss	cathepsin S	3.47477	1.95114	1.36743
Dmbt1	deleted in malignant brain tumors 1		Col6a6	collagen, type VI, alpha 6	-2.16231	-0.024279	0.68285		Egflam	EGF-like, fibronectin type III and laminin G domains	-1.16956	0.286004	0.695634		Hapln2	hyaluronan and proteoglycan link protein 2	-7.16486	-2.39114	-7.345		Sdc4	syndecan 4	0.303144	-0.209408	-0.378443		Angptl2	angiopoietin-like 2	-0.18258	1.0785	1.43859		Serpina3a	serine (or cysteine) peptidase inhibitor, clade A, member 3A	2.3946	1.90161	-0.0243462
Dmp1	dentin matrix protein 1		Col7a1	collagen, type VII, alpha 1	0.322954	2.30301	2.66846		Lrg1	leucine-rich alpha-2-glycoprotein 1	-1.12773	-1.9007	-2.37796								Anxa7	annexin A7	0.282869	-0.186637	-0.395294		Fam132b	family with sequence similarity 132, member B	2.56511	1.56477	1.2994		A2m	alpha-2-macroglobulin	1.67831	1.88812	1.71609
Dpt	dermatopontin		Col8a2	collagen, type VIII, alpha 2	-0.180468	1.23186	1.46096		Thbs3	thrombospondin 3	-1.10904	0.650105	0.800509								Anxa9	annexin A9	-0.317112	0.252077	-0.292876		Osm	oncostatin M	6.19576	2.59684	1.17387		Pcsk5	proprotein convertase subtilisin/kexin type 5	0.139115	1.86964	1.6523
Dspp	dentin sialophosphoprotein		Col9a1	collagen, type IX, alpha 1	-1.27655	-0.555041	0.361402		Smoc1	SPARC related modular calcium binding 1	-1.08405	-0.0902841	-0.025197								Grem1	gremlin 1	-1.96266	-0.816342	-0.335461		Ltb	lymphotoxin B	2.56745	1.35083	1.08239		Mmp14	matrix metallopeptidase 14 (membrane-inserted)	0.79664	1.8676	2.06128
Ecm1	extracellular matrix protein 1		Col9a2	collagen, type IX, alpha 2	0.798921	1.47531	1.29677		Mfap2	microfibrillar-associated protein 2	-1.07615	2.14879	2.35484								Sema5a	sema domain, seven thrombospondin repeats (type 1 and type 1-like), transmembrane domain (TM) and short cytoplasmic domain, (semaphorin) 5A	-0.669756	-0.929066	-0.643353		Cxcl5	chemokine (C-X-C motif) ligand 5	6.54471	3.52925	1.99657		Ctsk	cathepsin K	2.08793	1.86553	1.53571
Ecm2	extracellular matrix protein 2, female organ and adipocyte specific		Col9a3	collagen, type IX, alpha 3	-1.77989	-1.78855	-1.04804		Dpt	dermatopontin	-1.05368	0.901385	1.29504								Sema6a	sema domain, transmembrane domain (TM), and cytoplasmic domain, (semaphorin) 6A	-0.604235	-0.278334	-0.294902		Igf2	insulin-like growth factor 2	-1.38906	0.978512	1.42693		Adamts7	a disintegrin-like and metallopeptidase (reprolysin type) with thrombospondin type 1 motif, 7	0.1175	1.82695	2.17227
Edil3	EGF-like repeats and discoidin I-like domains 3								Efemp2	epidermal growth factor-containing fibulin-like extracellular matrix protein 2	-1.04778	-0.294117	-0.337782								Clec3b	C-type lectin domain family 3, member b	-0.19546	0.10051	0.266703		Gdnf	glial cell line derived neurotrophic factor	0.959453	0.653859	0.430563		Ctsz	cathepsin Z	2.59016	1.77782	1.20225
Efemp1	epidermal growth factor-containing fibulin-like extracellular matrix protein 1								Edil3	EGF-like repeats and discoidin I-like domains 3	-0.985161	0.0517868	0.611828								Lman1l	lectin, mannose-binding 1 like	0.573586	-0.122463	-0.384034		Crlf1	cytokine receptor-like factor 1	0.729342	1.76587	1.34418		Mmp23	matrix metallopeptidase 23	-0.572738	1.76589	2.17397
Efemp2	epidermal growth factor-containing fibulin-like extracellular matrix protein 2								Mmrn1	multimerin 1	-0.950245	-0.829896	-1.41582								Plxnb1	plexin B1	-0.0351074	-0.273692	-0.319935		Tgfb2	transforming growth factor, beta 2	-1.12296	0.37056	0.65964		Adam19	a disintegrin and metallopeptidase domain 19 (meltrin beta)	1.73875	1.68152	1.40367
Egfem1	RIKEN cDNA 6130401L20 gene								Vwa2	von Willebrand factor A domain containing 2	-0.909471	-1.16389	-1.00743								Sema3a	sema domain, immunoglobulin domain (Ig), short basic domain, secreted, (semaphorin) 3A	-0.000847897	0.018789	-0.144336		Cxcl2	chemokine (C-X-C motif) ligand 2	8.36684	3.63746	0.988571		Bmp1	bone morphogenetic protein 1	0.478413	1.60742	1.68008
Egflam	EGF-like, fibronectin type III and laminin G domains								Fras1	Fraser syndrome 1 homolog (human)	-0.855696	-1.26417	-0.486274								Parm1	prostate androgen-regulated mucin-like protein 1	-0.314024	-0.184506	-0.308821		Hhip	Hedgehog-interacting protein	-0.60606	-0.637029	-0.0284181		Adamts6	a disintegrin-like and metallopeptidase (reprolysin type) with thrombospondin type 1 motif, 6	0.456275	1.58104	1.32477
Eln	elastin								Crispld1	cysteine-rich secretory protein LCCL domain containing 1	-0.851946	-1.5629	-1.00707								C1qa	complement component 1, q subcomponent, alpha polypeptide	1.44572	1.01243	0.64602		Nrtn	neurturin	0.063479	0.523397	0.579591		Adamts9	a disintegrin-like and metallopeptidase (reprolysin type) with thrombospondin type 1 motif, 9	0.686063	1.44624	1.45166
Emid1	EMI domain containing 1								Bmper	BMP-binding endothelial regulator	-0.827466	-0.00249695	0.248418								Colec12	collectin sub-family member 12	0.206264	0.419416	0.0447481		Fgf12	fibroblast growth factor 12	0.278188	0.150816	0.842714		Mmp2	matrix metallopeptidase 2	1.16891	1.44499	1.28298
Emilin1	elastin microfibril interfacer 1								Postn	periostin, osteoblast specific factor	-0.75083	0.447365	0.508637								Anxa11	annexin A11	0.391552	0.00471931	-0.0452288		Cxcl14	chemokine (C-X-C motif) ligand 14	0.297834	0.411954	0.48874		Plod3	procollagen-lysine, 2-oxoglutarate 5-dioxygenase 3	1.18342	1.41207	1.37651
Emilin2	elastin microfibril interfacer 2								Lgi4	leucine-rich repeat LGI family, member 4	-0.712599	-0.318777	-0.44404								C1qtnf7	C1q and tumor necrosis factor related protein 7	-0.119971	0.091455	0.0991686		Il1f9	interleukin 1 family, member 9	2.23896	1.62838	0.432244		Adam28	a disintegrin and metallopeptidase domain 28	0.223047	1.38011	1.46056
Emilin3	elastin microfibril interfacer 3								Comp	cartilage oligomeric matrix protein	-0.704616	-0.77484	-1.00288								Sdc3	syndecan 3	-0.198972	0.246847	0.344218		Wnt16	wingless-related MMTV integration site 16	0.226293	0.181151	0.377166		Mmp17	matrix metallopeptidase 17	0.789558	1.3688	1.34828
Fbln1	fibulin 1								Npnt	nephronectin	-0.658792	-0.472534	-0.498876								Anxa2	annexin A2	0.985033	0.399769	0.0783541		Wnt4	wingless-related MMTV integration site 4	1.08788	0.908916	0.680884		Lepre1	leprecan 1	0.390716	1.35536	1.58604
Fbln2	fibulin 2								Ddx26b	DEAD/H (Asp-Glu-Ala-Asp/His) box polypeptide 26B	-0.654667	-0.398625	-0.51371								Sema3b	sema domain, immunoglobulin domain (Ig), short basic domain, secreted, (semaphorin) 3B	-1.20411	-0.295786	0.185134		Megf8	multiple EGF-like-domains 8	0.123306	0.661539	0.922937		Htra1	HtrA serine peptidase 1	0.843639	1.35353	1.44795
Fbln5	fibulin 5								Srpx	sushi-repeat-containing protein	-0.650029	-0.358513	-0.245905								Sdc2	syndecan 2	-0.858938	0.0510248	0.139521		Fgf11	fibroblast growth factor 11	-0.148013	0.630564	1.01397		Serpina3n	serine (or cysteine) peptidase inhibitor, clade A, member 3N	1.57446	1.30546	0.779523
Fbln7	fibulin 7								Ltbp3	latent transforming growth factor beta binding protein 3	-0.63433	0.134415	0.648442								Sftpc	surfactant associated protein C	5.12235	4.99613	0		Tchh	trichohyalin	-2.2771	1.09168	-1.11035		Masp2	mannan-binding lectin serine peptidase 2	-0.766062	1.30018	-6.0707
Fbn1	fibrillin 1								Nov	nephroblastoma overexpressed gene	-0.630742	1.15893	1.24121								Sema4a	sema domain, immunoglobulin domain (Ig), transmembrane domain (TM) and short cytoplasmic domain, (semaphorin) 4A	0.978768	0.443376	0.147111		Megf11	multiple EGF-like-domains 11	0.206056	2.18712	1.54174		Loxl3	lysyl oxidase-like 3	1.00344	1.28113	1.51749
Fbn2	fibrillin 2								Sparc	secreted acidic cysteine rich glycoprotein	-0.616237	0.124449	-0.381798								C1qc	complement component 1, q subcomponent, C chain	1.14865	0.593713	0.372741		Lefty1	left right determination factor 1	1.73927	1.42893	1.17874		Loxl2	lysyl oxidase-like 2	-0.00807667	1.25926	1.40637
Fga	fibrinogen alpha chain								Vtn	vitronectin	-0.607695	-0.556365	-0.844307								Sema3g	sema domain, immunoglobulin domain (Ig), short basic domain, secreted, (semaphorin) 3G	0.402059	-0.413395	-0.227252		Pdgfd	platelet-derived growth factor, D polypeptide	-0.856065	0.237417	0.616337		Leprel2	leprecan-like 2	-0.0253903	1.23614	1.6608
Fgb	fibrinogen beta chain								Fbn2	fibrillin 2	-0.571605	1.76009	2.56539								Sema6d	sema domain, transmembrane domain (TM), and cytoplasmic domain, (semaphorin) 6D	-0.25391	-0.101942	0.0771681		Il1rn	interleukin 1 receptor antagonist	4.10611	1.41701	0.293164		Hyal1	hyaluronoglucosaminidase 1	2.97658	1.23056	0.284339
Fgg	fibrinogen gamma chain								Tnxb	tenascin XB	-0.533642	-0.187001	-0.704886								Frem2	Fras1 related extracellular matrix protein 2	-1.06457	-0.911603	-0.632839		Igf1	insulin-like growth factor 1	0.29608	0.205094	0.578166		P4ha2	procollagen-proline, 2-oxoglutarate 4-dioxygenase (proline 4-hydroxylase), alpha II polypeptide	0.175716	1.19266	1.06317
Fgl1	fibrinogen-like protein 1								Colq	collagen-like tail subunit (single strand of homotrimer) of asymmetric acetylcholinesterase	-0.531239	-0.542244	-0.781165								Lgals7	lectin, galactose binding, soluble 7	1.0536	0.558861	0.197751		Wnt2	wingless-related MMTV integration site 2	0.937869	1.41343	0.492235		Adamts2	a disintegrin-like and metallopeptidase (reprolysin type) with thrombospondin type 1 motif, 2	-0.165135	1.17556	1.48607
Fgl2	fibrinogen-like protein 2								Tnn	tenascin N	-0.459634	3.24151	3.07915								Sema4d	sema domain, immunoglobulin domain (Ig), transmembrane domain (TM) and short cytoplasmic domain, (semaphorin) 4D	0.515149	0.487808	0.177707		Clcf1	cardiotrophin-like cytokine factor 1	3.41726	0.78039	0.461547		Tgm2	transglutaminase 2, C polypeptide	1.4534	1.17424	0.691496
Fn1	fibronectin 1								Ntn1	netrin 1	-0.450826	-0.288997	0.323026								Plxnd1	plexin D1	0.153535	0.320468	0.306861		Il1a	interleukin 1 alpha	2.89674	1.61234	0.772876		Adamts18	a disintegrin-like and metallopeptidase (reprolysin type) with thrombospondin type 1 motif, 18	-0.314842	1.03896	2.47924
Fndc1	fibronectin type III domain containing 1								Thsd4	thrombospondin, type I, domain containing 4	-0.437517	-0.406841	-0.600474								Gpc4	glypican 4	-1.02268	0.0375675	0.16423		Il16	interleukin 16	0.466101	0.00460607	0.464402		Cst3	cystatin C	-2.42861	1.00149	-1.09399
Fndc7	fibronectin type III domain containing 7								Mmrn2	multimerin 2	-0.405925	-0.290639	-0.43478								Plxdc1	plexin domain containing 1	-0.735321	-0.364666	-0.14333		Fgf1	fibroblast growth factor 1	-0.540168	-1.58961	-0.422073		Plod2	procollagen lysine, 2-oxoglutarate 5-dioxygenase 2	0.13482	1.00104	0.576001
Fndc8	fibronectin type III domain containing 8								Igfbp7	insulin-like growth factor binding protein 7	-0.402957	-0.152262	-0.181408								Anxa5	annexin A5	0.512231	0.721997	0.370426		Fgf5	fibroblast growth factor 5	0.504961	2.00206	1.82536		Ctsb	cathepsin B	1.53201	0.949286	0.646093
Fras1	Fraser syndrome 1 homolog (human)								Crim1	cysteine rich transmembrane BMP regulator 1 (chordin like)	-0.365311	-0.871349	-0.935795								Clec9a	C-type lectin domain family 9, member a	1.91627	0.711528	0.618107		Hgfac	hepatocyte growth factor activator	-0.388593	-0.259117	0.00208876		Serpinb1a	serine (or cysteine) peptidase inhibitor, clade B, member 1a	1.67253	0.924811	0.487666
Gas6	growth arrest specific 6								Smoc2	SPARC related modular calcium binding 2	-0.362387	-0.121449	-0.0613908								Clec4a3	C-type lectin domain family 4, member a3	2.27558	1.32814	0.825231		Eda	ectodysplasin-A	-0.128025	0.331455	0.51763		Plau	plasminogen activator, urokinase	1.51101	0.919517	0.518646
Gldn	gliomedin								Gas6	growth arrest specific 6	-0.340606	0.199	0.306625								Sema4b	sema domain, immunoglobulin domain (Ig), transmembrane domain (TM) and short cytoplasmic domain, (semaphorin) 4B	0.960703	0.546667	0.502252		Angptl6	angiopoietin-like 6	0.819754	0.281512	0.017719		Loxl1	lysyl oxidase-like 1	0.0147295	0.909812	0.780783
Hmcn1	hemicentin 1								Abi3bp	ABI gene family, member 3 (NESH) binding protein	-0.3223	-0.29415	-0.730245								Anxa1	annexin A1	1.97527	0.550932	0.0167074		Hbegf	heparin-binding EGF-like growth factor	3.25733	1.14803	0.367637		Adam9	a disintegrin and metallopeptidase domain 9 (meltrin gamma)	0.70929	0.902093	0.82053
Hmcn2	hemicentin 2								Mfge8	milk fat globule-EGF factor 8 protein	-0.314033	0.214166	0.228188								Sema6b	sema domain, transmembrane domain (TM), and cytoplasmic domain, (semaphorin) 6B	2.82152	1.73374	0.910295		Il7	interleukin 7	0.158838	0.344343	0.530314		Serpinc1	serine (or cysteine) peptidase inhibitor, clade C (antithrombin), member 1	0.904452	0.897362	0.709522
Ibsp	integrin binding sialoprotein								Lamb2	laminin, beta 2	-0.281272	-0.0858324	0.0429219								Sema3f	sema domain, immunoglobulin domain (Ig), short basic domain, secreted, (semaphorin) 3F	0.473254	0.322477	0.32438		Ccl22	chemokine (C-C motif) ligand 22	-0.304021	0.241562	0.241251		Ctsh	cathepsin H	1.28346	0.891447	0.4262
Igfals	insulin-like growth factor binding protein, acid labile subunit								Igfbp5	insulin-like growth factor binding protein 5	-0.268329	-0.0971226	0.255174								Clec5a	C-type lectin domain family 5, member a	3.17239	0.923588	0.590232		Hcfc1	host cell factor C1	0.515143	0.342263	0.332886		Adamts3	a disintegrin-like and metallopeptidase (reprolysin type) with thrombospondin type 1 motif, 3	-0.288368	0.863547	0.496544
Igfbp1	insulin-like growth factor binding protein 1								Nid1	nidogen 1	-0.228468	0.310658	0.283872								Clec4e	C-type lectin domain family 4, member e	4.97716	1.76796	1.21676		Inhba	inhibin beta-A	1.6073	0.104184	-0.261614		Plod1	procollagen-lysine, 2-oxoglutarate 5-dioxygenase 1	0.541691	0.856617	0.854712
Igfbp2	insulin-like growth factor binding protein 2								Fbln1	fibulin 1	-0.22205	-0.334865	0.122113								Muc13	mucin 13, epithelial transmembrane	2.055	-4.95576	0.347937		Bmp7	bone morphogenetic protein 7	-0.188097	-0.243018	-0.283012		Cstb	cystatin B	1.90142	0.854925	0.345296
Igfbp3	insulin-like growth factor binding protein 3								Rspo1	R-spondin homolog (Xenopus laevis)	-0.192077	-0.901691	-0.802024								Lgals9	lectin, galactose binding, soluble 9	2.06891	0.903634	0.696457		Wnt9a	wingless-type MMTV integration site 9A	-0.774861	0.586691	1.05643		Hyal2	hyaluronoglucosaminidase 2	1.217	0.849376	0.6681
Igfbp4	insulin-like growth factor binding protein 4								Aebp1	AE binding protein 1	-0.170432	1.02829	1.12389								Sdc1	syndecan 1	1.47532	0.75165	0.530023		Hcfc2	host cell factor C2	0.616398	0.381708	0.179182		Lox	lysyl oxidase	-0.514034	0.820251	0.51269
Igfbp5	insulin-like growth factor binding protein 5								Slit3	slit homolog 3 (Drosophila)	-0.154242	-0.363803	0.000879797								Anxa6	annexin A6	0.625986	0.713372	0.695579		Cxcl1	chemokine (C-X-C motif) ligand 1	3.31305	0.90766	-0.0402734		Ctsc	cathepsin C	1.37732	0.750196	0.769128
Igfbp6	insulin-like growth factor binding protein 6								Matn2	matrilin 2	-0.126165	1.14141	1.84398								Anxa4	annexin A4	0.610154	0.823723	0.732491		Ngf	nerve growth factor	2.27836	0.411458	-0.25876		Ctsl	cathepsin L	1.17435	0.734273	0.154146
Igfbp7	insulin-like growth factor binding protein 7								Sned1	sushi, nidogen and EGF-like domains 1	-0.124827	-0.498852	-1.09682								C1qtnf1	C1q and tumor necrosis factor related protein 1	0.263471	0.352739	0.557428		Tnfsf15	tumor necrosis factor (ligand) superfamily, member 15	0.380623	0.0413618	-6.59216		Adam8	a disintegrin and metallopeptidase domain 8	3.02129	0.725978	0.310517
Igfbpl1	insulin-like growth factor binding protein-like 1								Emilin3	elastin microfibril interfacer 3	-0.0753544	0.136419	0.0356259								Frem1	Fras1 related extracellular matrix protein 1	-0.886198	-0.766865	-0.0733		Wnt6	wingless-related MMTV integration site 6	-0.459194	-0.729894	-0.418136		Sulf1	sulfatase 1	0.321921	0.706421	0.405431
Igsf10	immunoglobulin superfamily, member 10								Rspo2	R-spondin 2 homolog (Xenopus laevis)	-0.0455285	-0.508865	-0.807418								Sema4c	sema domain, immunoglobulin domain (Ig), transmembrane domain (TM) and short cytoplasmic domain, (semaphorin) 4C	0.569122	0.756245	0.628657		Chrd	chordin	-1.10611	0.0262471	0.224333		Adamts12	a disintegrin-like and metallopeptidase (reprolysin type) with thrombospondin type 1 motif, 12	-0.64531	0.696432	0.642175
Kcp	kielin/chordin-like protein								Thbs4	thrombospondin 4	-0.00136825	0.746163	0.592828								Clec4b1	C-type lectin domain family 4, member b1	3.25647	1.72847	1.13734		Pdgfa	platelet derived growth factor, alpha	0.13724	0.102201	0.0724712		Serpina9	serine (or cysteine) peptidase inhibitor, clade A (alpha-1 antiproteinase, antitrypsin), member 9	1.83109	0.675817	0.566786
Lama1	laminin, alpha 1								Nell1	NEL-like 1 (chicken)	0	7.65321	7.324								Plxnc1	plexin C1	2.34783	1.31832	1.00873		Ereg	epiregulin	0.661907	0.838647	-0.0217851		Adamts17	a disintegrin-like and metallopeptidase (reprolysin type) with thrombospondin type 1 motif, 17	-0.875593	0.648701	1.91332
Lama2	laminin, alpha 2								Tinagl1	tubulointerstitial nephritis antigen-like 1	0.00753472	-0.504324	-0.450434								Clec4a1	C-type lectin domain family 4, member a1	3.10728	1.32848	0.749872		Ccl5	chemokine (C-C motif) ligand 5	6.79317	4.79148	0		Pappa	pregnancy-associated plasma protein A	-0.605831	0.558471	0.679689
Lama3	laminin, alpha 3								Agrn	agrin	0.0523912	0.244116	0.375444								Clec4n	C-type lectin domain family 4, member n	3.16818	1.75946	1.33284		Wfikkn1	WAP, FS, Ig, KU, and NTR-containing protein 1	-0.294918	-0.0531668	0.49242		Ctsa	cathepsin A	0.459692	0.523525	0.164241
Lama4	laminin, alpha 4								Matn4	matrilin 4	0.0595107	-0.860186	-0.417584								Gpc6	glypican 6	-1.0178	0.998425	0.905172		Ntf3	neurotrophin 3	-0.495373	-0.337393	-0.228702		Timp2	tissue inhibitor of metalloproteinase 2	-0.126122	0.518106	0.777946
Lama5	laminin, alpha 5								Lama5	laminin, alpha 5	0.0612924	0.0934959	-0.067919								Lman1	lectin, mannose-binding, 1	0.6019	0.893815	0.876905		Crlf3	cytokine receptor-like factor 3	0.688782	0.237648	0.106715		Serpinf1	serine (or cysteine) peptidase inhibitor, clade F, member 1	-0.748519	0.465945	0.431308
Lamb1	laminin B1 subunit 1								Ecm1	extracellular matrix protein 1	0.079427	0.148038	-0.0743373								Sema4f	sema domain, immunoglobulin domain (Ig), TM domain, and short cytoplasmic domain	0.547771	1.68171	1.38531		Fgf22	fibroblast growth factor 22	0.270792	0.658818	-0.142527		Tgm1	transglutaminase 1, K polypeptide	0.96051	0.439678	-0.1161
Lamb2	laminin, beta 2								Lamc1	laminin, gamma 1	0.0928293	0.106642	0.076031								Clec11a	C-type lectin domain family 11, member a	0.0122615	0.668412	1.09276		Hrnr	hornerin	-0.489687	0.732538	-0.0954778		Adamts8	a disintegrin-like and metallopeptidase (reprolysin type) with thrombospondin type 1 motif, 8	1.87763	0.423837	0.0700132
Lamb3	laminin, beta 3								Kcp	kielin/chordin-like protein	0.102769	1.57139	2.14364								Sema6c	sema domain, transmembrane domain (TM), and cytoplasmic domain, (semaphorin) 6C	-0.438642	0.648784	1.03188		Il1f8	interleukin 1 family, member 8	0.733215	0.799483	-0.280653		Serping1	serine (or cysteine) peptidase inhibitor, clade G, member 1	0.134386	0.420166	0.216531
Lamc1	laminin, gamma 1								Crispld2	cysteine-rich secretory protein LCCL domain containing 2	0.106975	0.673956	0.690757								C1qtnf2	C1q and tumor necrosis factor related protein 2	-0.624318	0.132529	1.02919		Inha	inhibin alpha	-1.04189	-0.203853	0.252567		Egln2	EGL nine homolog 2 (C. elegans)	0.742588	0.403443	0.476525
Lamc2	laminin, gamma 2								Mfap3	microfibrillar-associated protein 3	0.110725	0.144778	0.0685645								Plxna4	plexin A4	1.09167	0.994391	0.927709		Bmp2	bone morphogenetic protein 2	0.816311	0.248029	0.0388838		Tgm5	transglutaminase 5	0.950279	0.356398	-0.273864
Lamc3	laminin gamma 3								Lama4	laminin, alpha 4	0.197172	0.738388	0.574405								Sema4g	sema domain, immunoglobulin domain (Ig), transmembrane domain (TM) and short cytoplasmic domain, (semaphorin) 4G	1.0856	1.1044	0.923014		Pik3ip1	phosphoinositide-3-kinase interacting protein 1	-0.112368	0.0152762	0.0913545		Ctsd	cathepsin D	-2.17862	0.349202	-1.52929
Lgi1	leucine-rich repeat LGI family, member 1								Fbln5	fibulin 5	0.204609	0.714212	0.890853								Plxna3	plexin A3	1.42931	1.10821	1.02498		Fam132a	family with sequence similarity 132, member A	1.13177	0.475656	-0.0909431		P4ha1	procollagen-proline, 2-oxoglutarate 4-dioxygenase (proline 4-hydroxylase), alpha 1 polypeptide	0.38597	0.342593	0.263341
Lgi2	leucine-rich repeat LGI family, member 2								Mfap1b	microfibrillar-associated protein 1B	0.255849	-0.11532	-0.158134								Fcnb	ficolin B	4.4623	2.34709	1.80483		Cntf	ciliary neurotrophic factor	0.222686	-0.0680355	-0.0922724		Adam1b	a disintegrin and metallopeptidase domain 1b	-0.461397	0.323564	-1.38409
Lgi3	leucine-rich repeat LGI family, member 3								Igfbp3	insulin-like growth factor binding protein 3	0.302748	0.15035	-0.21402								Clec4g	C-type lectin domain family 4, member g	1.42364	2.40751	2.12704		Wnt11	wingless-related MMTV integration site 11	-1.07604	-0.498284	-0.362777		Adamts5	a disintegrin-like and metallopeptidase (reprolysin type) with thrombospondin type 1 motif, 5 (aggrecanase-2)	-0.809048	0.31431	-0.344343
Lgi4	leucine-rich repeat LGI family, member 4								Nid2	nidogen 2	0.323873	0.949013	1.14044								Clec4d	C-type lectin domain family 4, member d	8.74192	4.0694	2.3672		Pf4	platelet factor 4	2.36693	1.04579	0.371792		Adam17	a disintegrin and metallopeptidase domain 17	1.03493	0.305953	0.246506
Lrg1	leucine-rich alpha-2-glycoprotein 1								Ntng1	netrin G1	0.333035	0.46685	0.567345								Lgals1	lectin, galactose binding, soluble 1	1.51427	2.14844	2.22394		Tnf	tumor necrosis factor	1.69413	0.214263	0.0849591		Hpse	heparanase	0.247051	0.276004	-0.245269
Ltbp1	latent transforming growth factor beta binding protein 1								Pcolce	procollagen C-endopeptidase enhancer protein	0.351599	1.39859	1.41256								Hpx	hemopexin	1.19952	0.740593	1.72082		Epgn	epithelial mitogen	2.72938	0.183204	0.0398765		Mmp8	matrix metallopeptidase 8	2.0159	0.262274	-0.291339
Ltbp2	latent transforming growth factor beta binding protein 2								Cyr61	cysteine rich protein 61	0.375355	0.287085	-0.275556								Gpc3	glypican 3	-0.532964	0.552854	1.16204		Angpt2	angiopoietin 2	0.767075	0.477678	0.584034		Adam15	a disintegrin and metallopeptidase domain 15 (metargidin)	0.230512	0.202413	0.0812431
Ltbp3	latent transforming growth factor beta binding protein 3								Rspo4	R-spondin family, member 4	0.403208	0.264695	0.205046								C1qtnf3	C1q and tumor necrosis factor related protein 3	0.251903	1.92422	2.27139		Tnfsf8	tumor necrosis factor (ligand) superfamily, member 8	0.846087	0.533611	0.461335		Egln1	EGL nine homolog 1 (C. elegans)	0.344428	0.166883	0.00437511
Ltbp4	latent transforming growth factor beta binding protein 4								Svep1	sushi, von Willebrand factor type A, EGF and pentraxin domain containing 1	0.425944	0.0401295	-0.364018								Clec7a	C-type lectin domain family 7, member a	5.50489	2.77032	2.68758		Il23a	interleukin 23, alpha subunit p19	-0.651442	-2.14225	-1.1441		Hyal3	hyaluronoglucosaminidase 3	1.03421	0.131683	-0.228853
Matn1	matrilin 1, cartilage matrix protein								Tsku	tsukushin	0.437365	1.00117	1.02002								C1qtnf6	C1q and tumor necrosis factor related protein 6	1.08217	2.59061	3.24237		Bdnf	brain derived neurotrophic factor	-1.5432	-0.785422	-0.433012		Serpinb8	serine (or cysteine) peptidase inhibitor, clade B, member 8	-0.0632684	0.107317	-0.634317
Matn2	matrilin 2								Papln	papilin, proteoglycan-like sulfated glycoprotein	0.450374	-0.169276	-0.029831								Clec12a	C-type lectin domain family 12, member a	3.20719	2.30611	3.74389		Egfl8	EGF-like domain 8	-0.354755	-0.261594	-0.225761		Egln3	EGL nine homolog 3 (C. elegans)	0.320187	0.0726986	-0.128863
Matn3	matrilin 3								Fbn1	fibrillin 1	0.473254	1.3061	0.94086														Il1f5	interleukin 1 family, member 5 (delta)	-0.0960398	0.0769579	-0.278521		Hyal4	hyaluronoglucosaminidase 4	-0.4056	0.0488866	-0.238471
Matn4	matrilin 4								Creld1	cysteine-rich with EGF-like domains 1	0.51752	0.557749	0.504494														Fstl3	follistatin-like 3	-0.278751	-0.196182	-0.663412		Astl	astacin-like metalloendopeptidase (M12 family)	5.12235	0	7.62646
Mepe	matrix extracellular phosphoglycoprotein with ASARM motif (bone)								Emid1	EMI domain containing 1	0.532302	1.19505	1.50591														Ntf5	neurotrophin 5	0.413542	-0.699758	-1.69336		Ctso	cathepsin O	0.229822	-0.0274908	-0.105794
Mfap1a	microfibrillar-associated protein 1A								Spon2	spondin 2, extracellular matrix protein	0.549798	0.165478	-0.109456														Wnt3	wingless-related MMTV integration site 3	-0.683059	-0.407134	-0.551212		Serpinb6a	serine (or cysteine) peptidase inhibitor, clade B, member 6a	0.463231	-0.0283087	-0.716556
Mfap1b	microfibrillar-associated protein 1B								Slit2	slit homolog 2 (Drosophila)	0.550965	0.241856	0.610155														Csf1	colony stimulating factor 1 (macrophage)	0.266181	-0.132894	-0.0845948		Ogfod2	2-oxoglutarate and iron-dependent oxygenase domain containing 2	0.265483	-0.0780788	0.0977717
Mfap2	microfibrillar-associated protein 2								Fgl1	fibrinogen-like protein 1	0.553956	-1.06902	-3.31239														Tnfsf13b	tumor necrosis factor (ligand) superfamily, member 13b	0.166798	0.0268167	-0.23055		Ngly1	N-glycanase 1	-0.147734	-0.0917099	-0.119881
Mfap3	microfibrillar-associated protein 3								Hmcn1	hemicentin 1	0.571361	1.28813	1.90841														Megf9	multiple EGF-like-domains 9	-0.0922502	-0.40777	-0.524596		Adamts14	a disintegrin-like and metallopeptidase (reprolysin type) with thrombospondin type 1 motif, 14	-2.14986	-0.0948239	0.161171
Mfap4	microfibrillar-associated protein 4								Ltbp1	latent transforming growth factor beta binding protein 1	0.589785	1.0102	0.821271														Angptl4	angiopoietin-like 4	0.74481	0.280997	-0.261352		Serpinb5	serine (or cysteine) peptidase inhibitor, clade B, member 5	0.0585074	-0.103535	-0.50086
Mfap5	microfibrillar associated protein 5								Ltbp2	latent transforming growth factor beta binding protein 2	0.597871	1.35694	0.958002														Bmp5	bone morphogenetic protein 5	-0.585051	-0.722832	-0.653174		Serpinb12	serine (or cysteine) peptidase inhibitor, clade B (ovalbumin), member 12	-0.782067	-0.15088	0.0100815
Mfge8	milk fat globule-EGF factor 8 protein								Fbln2	fibulin 2	0.68057	3.09277	2.68012														Tnfsf13	tumor necrosis factor (ligand) superfamily, member 13	0.302158	-0.233184	-0.598678		Htra3	HtrA serine peptidase 3	-0.653646	-0.165698	-0.461112
Mgp	matrix Gla protein								AW551984	expressed sequence AW551984	0.68331	1.96476	2.00188														Pdgfb	platelet derived growth factor, B polypeptide	-0.36835	-0.132003	-0.227098		Serpine2	serine (or cysteine) peptidase inhibitor, clade E, member 2	-0.233281	-0.176817	-0.138655
Mmrn1	multimerin 1								Efemp1	epidermal growth factor-containing fibulin-like extracellular matrix protein 1	0.68342	0.102613	-0.280311														Fgfbp1	fibroblast growth factor binding protein 1	0.599119	-0.216631	-0.59439		Serpinb2	serine (or cysteine) peptidase inhibitor, clade B, member 2	0.131768	-0.179612	-0.914796
Mmrn2	multimerin 2								Igfals	insulin-like growth factor binding protein, acid labile subunit	0.69839	0.852541	-0.405592														Cxcl9	chemokine (C-X-C motif) ligand 9	0.0147093	-0.249754	0.182991		Itih5	inter-alpha (globulin) inhibitor H5	-1.11296	-0.191658	0.416314
Ndnf	RIKEN cDNA A930038C07 gene								Vwa1	von Willebrand factor A domain containing 1	0.702156	1.39168	1.31853														Bmp3	bone morphogenetic protein 3	-0.707485	-0.790611	-1.07963		Adamts1	a disintegrin-like and metallopeptidase (reprolysin type) with thrombospondin type 1 motif, 1	-0.630573	-0.198423	0.0631134
Nell1	NEL-like 1 (chicken)								Pxdn	peroxidasin homolog (Drosophila)	0.708118	3.51017	3.54873														Wnt7b	wingless-related MMTV integration site 7B	-0.2362	-0.295401	-0.671054		Kazald1	Kazal-type serine peptidase inhibitor domain 1	-0.299228	-0.225658	-0.62293
Nell2	NEL-like 2 (chicken)								Vwf	Von Willebrand factor homolog	0.817226	1.03247	0.74902														Cx3cl1	chemokine (C-X3-C motif) ligand 1	-0.173215	0.00149733	-0.221382		Ctsf	cathepsin F	-0.217923	-0.280476	-0.66621
Nid1	nidogen 1								Vwa5a	von Willebrand factor A domain containing 5A	0.859339	1.02767	0.629527														Ccl4	chemokine (C-C motif) ligand 4	7.47229	2.02447	-1.44543		St14	suppression of tumorigenicity 14 (colon carcinoma)	0.250256	-0.299032	-0.618857
Nid2	nidogen 2								Wisp2	WNT1 inducible signaling pathway protein 2	0.872121	0.572485	-0.429346														Flt3l	FMS-like tyrosine kinase 3 ligand	-0.409025	-0.121511	0.0293498		Mmp15	matrix metallopeptidase 15	-0.335455	-0.315758	-0.265869
Nov	nephroblastoma overexpressed gene								Ctgf	connective tissue growth factor	0.893093	0.686245	0.388192														Fgf13	fibroblast growth factor 13	-1.53543	-0.514765	-0.292453		Htra4	HtrA serine peptidase 4	0.566964	-0.329271	-1.48677
Npnt	nephronectin								Srpx2	sushi-repeat-containing protein, X-linked 2	1.02876	1.62289	1.26623														Nrg4	neuregulin 4	-0.0466985	-0.854928	-1.20694		Adam22	a disintegrin and metallopeptidase domain 22	-0.803483	-0.332934	0.295405
Ntn1	netrin 1								Tnfaip6	tumor necrosis factor alpha induced protein 6	1.209	0.821994	0.569674														Ccl6	chemokine (C-C motif) ligand 6	2.07332	0.428893	-0.444576		Mmp21	matrix metallopeptidase 21	0.206056	-0.341707	-5.09201
Ntn3	netrin 3								Thbs1	thrombospondin 1	1.22491	-0.807521	-1.03306														Ccl19	chemokine (C-C motif) ligand 19	0.472159	-0.483674	-0.820284		Adamtsl4	ADAMTS-like 4	-0.297729	-0.350753	0.0650155
Ntn4	netrin 4								Creld2	cysteine-rich with EGF-like domains 2	1.41596	0.814476	0.660345														Sfrp4	secreted frizzled-related protein 4	1.82475	1.96108	0.77914		Tll1	tolloid-like	-0.684064	-0.391766	-0.420198
Ntn5	netrin 5								Lamb3	laminin, beta 3	1.44141	0.342653	-0.0302598														Tnfsf11	tumor necrosis factor (ligand) superfamily, member 11	0.764894	0.317288	-0.0295968		F2	coagulation factor II	-1.35043	-0.418805	-0.000352065
Ntng1	netrin G1								Mgp	matrix Gla protein	1.49946	0.845224	-0.196469														Angptl1	angiopoietin-like 1	-2.03437	-0.212254	0.139592		Itih4	inter alpha-trypsin inhibitor, heavy chain 4	-0.315409	-0.492155	-1.03829
Ntng2	netrin G2								Tgfbi	transforming growth factor, beta induced	1.59139	1.93093	1.54414														Angpt1	angiopoietin 1	-0.734012	-0.0907622	-0.218327		Pcsk6	proprotein convertase subtilisin/kexin type 6	-0.618569	-0.509953	-0.688206
Oit3	oncoprotein induced transcript 3								Spon1	spondin 1, (f-spondin) extracellular matrix protein	1.59597	2.89937	2.8448														Fst	follistatin	-0.0919268	-0.868793	-0.957813		Pappa2	pappalysin 2	1.15011	-0.542286	-0.229353
Otog	otogelin								Thbs2	thrombospondin 2	1.65559	3.11927	3.05013														Vegfb	vascular endothelial growth factor B	-0.45676	-0.783253	-0.426367		Adamtsl1	ADAMTS-like 1	-1.19487	-0.54264	0.647369
Otogl	predicted gene 6924								Igfbp4	insulin-like growth factor binding protein 4	1.65711	1.83887	1.99423														Fgfbp3	fibroblast growth factor binding protein 3	-0.776901	-0.792346	-0.175646		Agt	angiotensinogen (serpin peptidase inhibitor, clade A, member 8)	-0.476005	-0.580049	-0.899322
Otol1	predicted gene 414								Fn1	fibronectin 1	1.69882	4.04951	3.63086														Hgf	hepatocyte growth factor	-0.0386693	0.217999	-0.553512		F13a1	coagulation factor XIII, A1 subunit	-0.544017	-0.72638	-0.900687
Papln	papilin, proteoglycan-like sulfated glycoprotein								Emilin2	elastin microfibril interfacer 2	1.77666	1.00031	1.09949														Figf	c-fos induced growth factor	-0.883756	-0.952627	-0.352836		Masp1	mannan-binding lectin serine peptidase 1	0.696419	-0.744121	-1.6745
Pcolce	procollagen C-endopeptidase enhancer protein								Lama3	laminin, alpha 3	1.79439	0.906942	0.37625														Fgf2	fibroblast growth factor 2	-0.185948	-0.832608	-1.02608		Leprel1	leprecan-like 1	-0.0136529	-0.753895	-0.807816
Pcolce2	procollagen C-endopeptidase enhancer 2								Emilin1	elastin microfibril interfacer 1	1.89667	3.69307	3.25415														Sfrp1	secreted frizzled-related protein 1	0.722359	0.336222	0.10669		Mmp27	matrix metallopeptidase 27	-0.560802	-0.784414	0.575555
Postn	periostin, osteoblast specific factor								Coch	coagulation factor C homolog (Limulus polyphemus)	2.05183	1.73444	0.0805743														Ccl12	chemokine (C-C motif) ligand 12	1.4281	0.30024	-0.225012		Adam11	a disintegrin and metallopeptidase domain 11	-0.964417	-0.83109	-0.735627
Pxdn	peroxidasin homolog (Drosophila)								Fgl2	fibrinogen-like protein 2	2.1406	0.977128	0.393767														Il15	interleukin 15	-0.397966	-0.209999	-0.670037		Serpina12	serine (or cysteine) peptidase inhibitor, clade A (alpha-1 antiproteinase, antitrypsin), member 12	-1.43939	-0.866084	-1.50221
Reln	reelin								Cthrc1	collagen triple helix repeat containing 1	2.18941	6.23336	5.95229														Chrdl1	chordin-like 1	0.402308	-0.202257	-0.48154		Cpn2	carboxypeptidase N, polypeptide 2	-1.66705	-0.883247	-1.17051
Rspo1	R-spondin homolog (Xenopus laevis)								Lgi2	leucine-rich repeat LGI family, member 2	2.2699	4.82044	4.70307														Tgfa	transforming growth factor alpha	0.769913	-0.208003	-0.937915		Kng2	kininogen 2	0.192755	-0.90639	-1.71245
Rspo2	R-spondin 2 homolog (Xenopus laevis)								Wisp1	WNT1 inducible signaling pathway protein 1	2.32903	3.71978	3.50273														Il34	interleukin 34	0.117061	-0.287771	-0.529898		Adamtsl3	ADAMTS-like 3	-1.53424	-0.956087	-0.619174
Rspo3	R-spondin 3 homolog (Xenopus laevis)								Slamf6	SLAM family member 6	2.39195	1.54436	0.999692														Kitl	kit ligand	-0.0873883	-0.694121	-0.850009		Mmp28	matrix metallopeptidase 28 (epilysin)	-0.518093	-1.06992	-1.35795
Rspo4	R-spondin family, member 4								Lamc2	laminin, gamma 2	2.99654	1.91932	1.25562														Il18	interleukin 18	-0.854614	-0.538854	-0.842869		P4htm	prolyl 4-hydroxylase, transmembrane (endoplasmic reticulum)	-1.10887	-1.07201	-0.602499
Sbspon	predicted gene 106								Tnc	tenascin C	4.00923	5.99326	5.58407														Egfl7	EGF-like domain 7	-0.232968	-0.338351	-0.471278		Prss12	protease, serine, 12 neurotrypsin (motopsin)	-1.59971	-1.16496	-1.044
Slamf6	SLAM family member 6								Lgi3	leucine-rich repeat LGI family, member 3	5.12235	4.79148	0														Ctf1	cardiotrophin 1	-0.513969	-1.06497	-1.16219		Serpini1	serine (or cysteine) peptidase inhibitor, clade I, member 1	-1.64042	-1.18003	-0.879574
Slit1	slit homolog 1 (Drosophila)								Spp1	secreted phosphoprotein 1	5.48019	4.36804	3.44011														Vegfa	vascular endothelial growth factor A	0.674734	-0.49251	-0.658023		Ctsw	cathepsin W	-0.136077	-1.22337	-0.246099
Slit2	slit homolog 2 (Drosophila)								Lama1	laminin, alpha 1	5.89996	3.44944	3.33011														Wif1	Wnt inhibitory factor 1	-0.513353	-1.18112	-1.40078		Serpinb7	serine (or cysteine) peptidase inhibitor, clade B, member 7	-1.32765	-1.24394	-1.3749
Slit3	slit homolog 3 (Drosophila)																										Pgf	placental growth factor	-1.10137	-0.81037	-0.439266		Cst6	cystatin E/M	-0.838288	-1.26874	-1.53403
Smoc1	SPARC related modular calcium binding 1																										Inhbb	inhibin beta-B	-0.225993	-0.448949	-1.24848		Serpinb11	serine (or cysteine) peptidase inhibitor, clade B (ovalbumin), member 11	-2.35133	-1.35334	-2.22862
Smoc2	SPARC related modular calcium binding 2																										Gdf5	growth differentiation factor 5	-0.259304	-1.33866	-0.43439		Loxl4	lysyl oxidase-like 4	-1.50041	-1.59166	-1.74425
Sned1	sushi, nidogen and EGF-like domains 1																										Cxcl12	chemokine (C-X-C motif) ligand 12	-0.0610969	-0.69505	-1.009		Serpinb13	serine (or cysteine) peptidase inhibitor, clade B (ovalbumin), member 13	-1.74763	-1.62092	-1.70151
Sparc	secreted acidic cysteine rich glycoprotein																										Bmp4	bone morphogenetic protein 4	-1.65293	-1.74936	-0.95608		Serpina1c	serine (or cysteine) peptidase inhibitor, clade A, member 1C	-1.54634	-1.67385	-1.72861
Sparcl1	SPARC-like 1																										Fgf7	fibroblast growth factor 7	0.525089	-0.177298	-0.726107		Timp4	tissue inhibitor of metalloproteinase 4	-1.58144	-1.92791	-1.31552
Spon1	spondin 1, (f-spondin) extracellular matrix protein																										Fgf16	fibroblast growth factor 16	-0.840596	0.23839	-0.605946		Timp3	tissue inhibitor of metalloproteinase 3	-1.89532	-2.08083	-1.99302
Spon2	spondin 2, extracellular matrix protein																										Artn	artemin	-0.896333	-1.06819	-2.17277		Ky	kyphoscoliosis peptidase	-3.53051	-2.44691	-2.25855
Spp1	secreted phosphoprotein 1																										Ccl11	chemokine (C-C motif) ligand 11	-0.433563	0.12645	0.0559816		Adamtsl2	ADAMTS-like 2	-4.91629	-5.13319	1.54174
Srpx	sushi-repeat-containing protein																										Ccl24	chemokine (C-C motif) ligand 24	-0.752878	-0.339704	-0.298546
Srpx2	sushi-repeat-containing protein, X-linked 2																										Il17d	interleukin 17D	-1.51377	-1.80783	-1.27125
Sspo	SCO-spondin																										Gdf1	growth differentiation factor 1	-1.78624	-1.80557	-1.57543
Svep1	sushi, von Willebrand factor type A, EGF and pentraxin domain containing 1																										Chrdl2	chordin-like 2	-6.28212	-1.24575	-6.46114
Tecta	tectorin alpha																										Btc	betacellulin, epidermal growth factor family member	-0.56594	-0.394869	-1.5932
Tectb	tectorin beta																										Ism1	isthmin 1 homolog (zebrafish)	-1.04228	-1.49197	-1.44407
Tgfbi	transforming growth factor, beta induced																										Scube1	signal peptide, CUB domain, EGF-like 1	-1.8122	-2.0899	-2.07365
Thbs1	thrombospondin 1																										Ccl2	chemokine (C-C motif) ligand 2	0.76398	-0.893639	-1.99904
Thbs2	thrombospondin 2																										Nrg2	neuregulin 2	-1.49026	-2.05666	-2.07879
Thbs3	thrombospondin 3																										Fgf9	fibroblast growth factor 9	-3.23431	-3.70362	-3.0491
Thbs4	thrombospondin 4																										Angpt4	angiopoietin 4	-0.00236485	-0.22366	-2.47244
Thsd4	thrombospondin, type I, domain containing 4																										Dhh	desert hedgehog	0.550875	-0.519921	-2.15347
Tinag	tubulointerstitial nephritis antigen																										Egf	epidermal growth factor	-1.5483	-1.59744	-1.79881
Tinagl1	tubulointerstitial nephritis antigen-like 1																										Sfrp5	secreted frizzled-related sequence protein 5	-1.48694	-1.83275	-2.69674
Tnc	tenascin C																										Wfikkn2	WAP, follistatin/kazal, immunoglobulin, kunitz and netrin domain containing 2	-8.9178	-3.11686	-2.15549
Tnfaip6	tumor necrosis factor alpha induced protein 6																										Ccl3	chemokine (C-C motif) ligand 3	5.89225	0.972421	-1.31055
Tnn	tenascin N																										Fgf18	fibroblast growth factor 18	-1.71781	-0.930647	-1.17533
Tnr	tenascin R																										Frzb	frizzled-related protein	-2.0091	-2.4219	-2.12463
Tnxb	tenascin XB																										Flg	filaggrin	-1.80536	-1.18556	-2.42076
Tsku	tsukushin																										Angptl7	angiopoietin-like 7	-2.74296	-2.93457	-2.73017
Tspear	RIKEN cDNA C330046G03 gene																										Lep	leptin	-4.49916	-4.06084	-3.32353
Vit	vitrin																										Mst1	macrophage stimulating 1 (hepatocyte growth factor-like)	-3.82395	-4.02706	-3.98837
Vtn	vitronectin																										Mstn	myostatin	-5.09201	-3.83272	-3.50932
Vwa1	von Willebrand factor A domain containing 1																										Gdf15	growth differentiation factor 15	2.64722	0.817272	-5.2547
Vwa2	von Willebrand factor A domain containing 2																										Bmp8a	bone morphogenetic protein 8a	-5.08342	-5.29489	0.00734147
Vwa3a	von Willebrand factor A domain containing 3A																										Wnt7a	wingless-related MMTV integration site 7A	-5.80496	-1.23373	-0.721126
Vwa3b	von Willebrand factor A domain containing 3B																										Fgf21	fibroblast growth factor 21	0.125743	-0.323744	-0.203034
Vwa5a	von Willebrand factor A domain containing 5A																										Rptn	repetin	-7.05115	-2.47557	-0.285259
Vwa5b1	von Willebrand factor A domain containing 5B1																										Csf3	colony stimulating factor 3 (granulocyte)	-1.07382	-7.56471	-7.52212
Vwa5b2	von Willebrand factor A domain containing 5B2
Vwa7	DNA segment, Chr 17, human D6S56E 3
Vwa9	RIKEN cDNA 2010321M09 gene
Vwce	von Willebrand factor C and EGF domains
Vwde	von Willebrand factor D and EGF domains
Vwf	Von Willebrand factor homolog
Wisp1	WNT1 inducible signaling pathway protein 1
Wisp2	WNT1 inducible signaling pathway protein 2
Wisp3	WNT1 inducible signaling pathway protein 3
Zp1	zona pellucida glycoprotein 1
Zp2	zona pellucida glycoprotein 2
Zp3	zona pellucida glycoprotein 3
Zp3r	zona pellucida 3 receptor
Zpld1	zona pellucida like domain containing 1
Col10a1	collagen, type X, alpha 1
Col11a1	collagen, type XI, alpha 1
Col11a2	collagen, type XI, alpha 2
Col12a1	collagen, type XII, alpha 1
Col13a1	collagen, type XIII, alpha 1
Col14a1	collagen, type XIV, alpha 1
Col15a1	collagen, type XV, alpha 1
Col16a1	collagen, type XVI, alpha 1
Col17a1	collagen, type XVII, alpha 1
Col18a1	collagen, type XVIII, alpha 1
Col19a1	collagen, type XIX, alpha 1
Col1a1	collagen, type I, alpha 1
Col1a2	collagen, type I, alpha 2
Col20a1	collagen, type XX, alpha 1
Col22a1	collagen, type XXII, alpha 1
Col23a1	collagen, type XXIII, alpha 1
Col24a1	collagen, type XXIV, alpha 1
Col25a1	collagen, type XXV, alpha 1
Col26a1	EMI domain containing 2
Col27a1	collagen, type XXVII, alpha 1
Col28a1	collagen, type XXVIII, alpha 1
Col2a1	collagen, type II, alpha 1
Col3a1	collagen, type III, alpha 1
Col4a1	collagen, type IV, alpha 1
Col4a2	collagen, type IV, alpha 2
Col4a3	collagen, type IV, alpha 3
Col4a4	collagen, type IV, alpha 4
Col4a5	collagen, type IV, alpha 5
Col4a6	collagen, type IV, alpha 6
Col5a1	collagen, type V, alpha 1
Col5a2	collagen, type V, alpha 2
Col5a3	collagen, type V, alpha 3
Col6a1	collagen, type VI, alpha 1
Col6a2	collagen, type VI, alpha 2
Col6a3	collagen, type VI, alpha 3
Col6a4	collagen, type VI, alpha 4
Col6a5	predicted gene 7455
Col6a6	collagen, type VI, alpha 6
Col7a1	collagen, type VII, alpha 1
Col8a1	collagen, type VIII, alpha 1
Col8a2	collagen, type VIII, alpha 2
Col9a1	collagen, type IX, alpha 1
Col9a2	collagen, type IX, alpha 2
Col9a3	collagen, type IX, alpha 3
Acan	aggrecan
Aspn	asporin
Bcan	brevican
Bgn	biglycan
Chad	chondroadherin
Chadl	chondroadherin-like
Dcn	decorin
Epyc	epiphycan
Esm1	endothelial cell-specific molecule 1
Fmod	fibromodulin
Hapln1	hyaluronan and proteoglycan link protein 1
Hapln2	hyaluronan and proteoglycan link protein 2
Hapln3	hyaluronan and proteoglycan link protein 3
Hapln4	hyaluronan and proteoglycan link protein 4
Hspg2	perlecan (heparan sulfate proteoglycan 2)
Impg1	interphotoreceptor matrix proteoglycan 1
Impg2	interphotoreceptor matrix proteoglycan 2
Kera	keratocan
Lum	lumican
Ncan	neurocan
Nepn	nephrocan
Nyx	nyctalopin
Ogn	osteoglycin
Omd	osteomodulin
Optc	opticin
Podn	podocan
Podnl1	podocan-like 1
Prelp	proline arginine-rich end leucine-rich repeat
Prg2	proteoglycan 2, bone marrow
Prg3	proteoglycan 3
Prg4	proteoglycan 4 (megakaryocyte stimulating factor, articular superficial zone protein)
Spock1	sparc/osteonectin, cwcv and kazal-like domains proteoglycan 1
Spock2	sparc/osteonectin, cwcv and kazal-like domains proteoglycan 2
Spock3	sparc/osteonectin, cwcv and kazal-like domains proteoglycan 3
Srgn	serglycin
Vcan	versican
Anxa1	annexin A1
Anxa10	annexin A10
Anxa11	annexin A11
Anxa13	annexin A13
Anxa2	annexin A2
Anxa3	annexin A3
Anxa4	annexin A4
Anxa5	annexin A5
Anxa6	annexin A6
Anxa7	annexin A7
Anxa8	annexin A8
Anxa9	annexin A9
C1qa	complement component 1, q subcomponent, alpha polypeptide
C1qb	complement component 1, q subcomponent, beta polypeptide
C1qc	complement component 1, q subcomponent, C chain
C1ql1	complement component 1, q subcomponent-like 1
C1ql2	complement component 1, q subcomponent-like 2
C1ql3	C1q-like 3
C1ql4	complement component 1, q subcomponent-like 4
C1qtnf1	C1q and tumor necrosis factor related protein 1
C1qtnf2	C1q and tumor necrosis factor related protein 2
C1qtnf3	C1q and tumor necrosis factor related protein 3
C1qtnf4	C1q and tumor necrosis factor related protein 4
C1qtnf5	C1q and tumor necrosis factor related protein 5
C1qtnf6	C1q and tumor necrosis factor related protein 6
C1qtnf7	C1q and tumor necrosis factor related protein 7
C1qtnf9	C1q and tumor necrosis factor related protein 9
Cd209a	CD209a antigen
Cd209b	CD209b antigen
Cd209d	CD209d antigen
Clc	Charcot-Leyden crystal protein
Clec10a	C-type lectin domain family 10, member A
Clec11a	C-type lectin domain family 11, member a
Clec12a	C-type lectin domain family 12, member a
Clec12b	C-type lectin domain family 12, member B
Clec14a	C-type lectin domain family 14, member a
Clec18a	C-type lectin domain family 18, member A
Clec1a	C-type lectin domain family 1, member a
Clec1b	C-type lectin domain family 1, member b
Clec2d	C-type lectin domain family 2, member d
Clec2e	C-type lectin domain family 2, member e
Clec2g	C-type lectin domain family 2, member g
Clec2h	C-type lectin domain family 2, member h
Clec2i	C-type lectin domain family 2, member i
Clec2j	C-type lectin domain family 2, member J
Clec2l	C-type lectin domain family, member L
Clec3a	C-type lectin domain family 3, member a
Clec3b	C-type lectin domain family 3, member b
Clec4a1	C-type lectin domain family 4, member a1
Clec4a2	C-type lectin domain family 4, member a2
Clec4a3	C-type lectin domain family 4, member a3
Clec4a4	C-type lectin domain family 4, member a4
Clec4b1	C-type lectin domain family 4, member b1
Clec4b2	C-type lectin domain family 4, member b2
Clec4d	C-type lectin domain family 4, member d
Clec4e	C-type lectin domain family 4, member e
Clec4f	C-type lectin domain family 4, member f
Clec4g	C-type lectin domain family 4, member g
Clec4n	C-type lectin domain family 4, member n
Clec5a	C-type lectin domain family 5, member a
Clec7a	C-type lectin domain family 7, member a
Clec9a	C-type lectin domain family 9, member a
Colec10	collectin sub-family member 10
Colec11	collectin sub-family member 11
Colec12	collectin sub-family member 12
Cspg4	chondroitin sulfate proteoglycan 4
Cspg5	chondroitin sulfate proteoglycan 5
Elfn1	leucine rich repeat and fibronectin type III, extracellular 1
Elfn2	leucine rich repeat and fibronectin type III, extracellular 2
Emcn	endomucin
Fcna	ficolin A
Fcnb	ficolin B
Frem1	Fras1 related extracellular matrix protein 1
Frem2	Fras1 related extracellular matrix protein 2
Frem3	Fras1 related extracellular matrix protein 3
Gm7534	predicted gene 7534
Gm9573	predicted gene 9573
Gpc1	glypican 1
Gpc2	glypican 2 (cerebroglycan)
Gpc3	glypican 3
Gpc4	glypican 4
Gpc5	glypican 5
Gpc6	glypican 6
Grem1	gremlin 1
Grifin	galectin-related inter-fiber protein
Hpx	hemopexin
Itln1	intelectin 1 (galactofuranose binding)
Itlnb	intelectin b
Lgals1	lectin, galactose binding, soluble 1
Lgals12	lectin, galactose binding, soluble 12
Lgals2	lectin, galactose-binding, soluble 2
Lgals3	lectin, galactose binding, soluble 3
Lgals4	lectin, galactose binding, soluble 4
Lgals6	lectin, galactose binding, soluble 6
Lgals7	lectin, galactose binding, soluble 7
Lgals8	lectin, galactose binding, soluble 8
Lgals9	lectin, galactose binding, soluble 9
Lgalsl	RIKEN cDNA 1110067D22 gene
Lman1	lectin, mannose-binding, 1
Lman1l	lectin, mannose-binding 1 like
Mbl1	mannose-binding lectin (protein A) 1
Mbl2	mannose-binding lectin (protein C) 2
Muc1	mucin 1, transmembrane
Muc13	mucin 13, epithelial transmembrane
Muc15	mucin 15
Muc16	mucin 16
Muc19	mucin 19
Muc2	mucin 2
Muc20	mucin 20
Muc3	mucin 3, intestinal
Muc4	mucin 4
Muc5ac	mucin 5, subtypes A and C, tracheobronchial/gastric
Muc5b	mucin 5, subtype B, tracheobronchial
Muc6	mucin 6, gastric
Mucl1	mucin-like 1
Ovgp1	oviductal glycoprotein 1
Parm1	prostate androgen-regulated mucin-like protein 1
Plxdc1	plexin domain containing 1
Plxdc2	plexin domain containing 2
Plxna1	plexin A1
Plxna2	plexin A2
Plxna3	plexin A3
Plxna4	plexin A4
Plxnb1	plexin B1
Plxnb2	plexin B2
Plxnb3	plexin B3
Plxnc1	plexin C1
Plxnd1	plexin D1
Prol1	proline rich, lacrimal 1
Reg1	regenerating islet-derived 1
Reg2	regenerating islet-derived 2
Reg3a	regenerating islet-derived 3 alpha
Reg3b	regenerating islet-derived 3 beta
Reg3d	regenerating islet-derived 3 delta
Reg3g	regenerating islet-derived 3 gamma
Reg4	regenerating islet-derived family, member 4
Sdc1	syndecan 1
Sdc2	syndecan 2
Sdc3	syndecan 3
Sdc4	syndecan 4
Sema3a	sema domain, immunoglobulin domain (Ig), short basic domain, secreted, (semaphorin) 3A
Sema3b	sema domain, immunoglobulin domain (Ig), short basic domain, secreted, (semaphorin) 3B
Sema3c	sema domain, immunoglobulin domain (Ig), short basic domain, secreted, (semaphorin) 3C
Sema3d	sema domain, immunoglobulin domain (Ig), short basic domain, secreted, (semaphorin) 3D
Sema3e	sema domain, immunoglobulin domain (Ig), short basic domain, secreted, (semaphorin) 3E
Sema3f	sema domain, immunoglobulin domain (Ig), short basic domain, secreted, (semaphorin) 3F
Sema3g	sema domain, immunoglobulin domain (Ig), short basic domain, secreted, (semaphorin) 3G
Sema4a	sema domain, immunoglobulin domain (Ig), transmembrane domain (TM) and short cytoplasmic domain, (semaphorin) 4A
Sema4b	sema domain, immunoglobulin domain (Ig), transmembrane domain (TM) and short cytoplasmic domain, (semaphorin) 4B
Sema4c	sema domain, immunoglobulin domain (Ig), transmembrane domain (TM) and short cytoplasmic domain, (semaphorin) 4C
Sema4d	sema domain, immunoglobulin domain (Ig), transmembrane domain (TM) and short cytoplasmic domain, (semaphorin) 4D
Sema4f	sema domain, immunoglobulin domain (Ig), TM domain, and short cytoplasmic domain
Sema4g	sema domain, immunoglobulin domain (Ig), transmembrane domain (TM) and short cytoplasmic domain, (semaphorin) 4G
Sema5a	sema domain, seven thrombospondin repeats (type 1 and type 1-like), transmembrane domain (TM) and short cytoplasmic domain, (semaphorin) 5A
Sema5b	sema domain, seven thrombospondin repeats (type 1 and type 1-like), transmembrane domain (TM) and short cytoplasmic domain, (semaphorin) 5B
Sema6a	sema domain, transmembrane domain (TM), and cytoplasmic domain, (semaphorin) 6A
Sema6b	sema domain, transmembrane domain (TM), and cytoplasmic domain, (semaphorin) 6B
Sema6c	sema domain, transmembrane domain (TM), and cytoplasmic domain, (semaphorin) 6C
Sema6d	sema domain, transmembrane domain (TM), and cytoplasmic domain, (semaphorin) 6D
Sema7a	sema domain, immunoglobulin domain (Ig), and GPI membrane anchor, (semaphorin) 7A
Sfta2	surfactant associated 2
Sftpa1	surfactant associated protein A1
Sftpb	surfactant associated protein B
Sftpc	surfactant associated protein C
Sftpd	surfactant associated protein D
1810010H24Rik	RIKEN cDNA 1810010H24 gene
2010005H15Rik	RIKEN cDNA 2010005H15 gene
8030411F24Rik	RIKEN cDNA 8030411F24 gene
9230104L09Rik	RIKEN cDNA 9230104L09 gene
A2m	alpha-2-macroglobulin
Adam10	a disintegrin and metallopeptidase domain 10
Adam11	a disintegrin and metallopeptidase domain 11
Adam12	a disintegrin and metallopeptidase domain 12 (meltrin alpha)
Adam15	a disintegrin and metallopeptidase domain 15 (metargidin)
Adam17	a disintegrin and metallopeptidase domain 17
Adam18	a disintegrin and metallopeptidase domain 18
Adam19	a disintegrin and metallopeptidase domain 19 (meltrin beta)
Adam1a	a disintegrin and metallopeptidase domain 1a
Adam1b	a disintegrin and metallopeptidase domain 1b
Adam2	a disintegrin and metallopeptidase domain 2
Adam20	RIKEN cDNA 4930529F22 gene
Adam21	a disintegrin and metallopeptidase domain 21
Adam22	a disintegrin and metallopeptidase domain 22
Adam23	a disintegrin and metallopeptidase domain 23
Adam24	a disintegrin and metallopeptidase domain 24 (testase 1)
Adam25	a disintegrin and metallopeptidase domain 25 (testase 2)
Adam26a	a disintegrin and metallopeptidase domain 26A (testase 3)
Adam26b	a disintegrin and metallopeptidase domain 26B
Adam28	a disintegrin and metallopeptidase domain 28
Adam29	a disintegrin and metallopeptidase domain 29
Adam3	a disintegrin and metallopeptidase domain 3 (cyritestin)
Adam30	a disintegrin and metallopeptidase domain 30
Adam32	a disintegrin and metallopeptidase domain 32
Adam33	a disintegrin and metallopeptidase domain 33
Adam34	a disintegrin and metallopeptidase domain 34
Adam39	a disintegrin and metallopeptidase domain 39
Adam4	a disintegrin and metallopeptidase domain 4
Adam5	a disintegrin and metallopeptidase domain 5
Adam6a	a disintegrin and metallopeptidase domain 6A
Adam6b	a disintegrin and metallopeptidase domain 6B
Adam7	a disintegrin and metallopeptidase domain 7
Adam8	a disintegrin and metallopeptidase domain 8
Adam9	a disintegrin and metallopeptidase domain 9 (meltrin gamma)
Adamdec1	ADAM-like, decysin 1
Adamts1	a disintegrin-like and metallopeptidase (reprolysin type) with thrombospondin type 1 motif, 1
Adamts10	a disintegrin-like and metallopeptidase (reprolysin type) with thrombospondin type 1 motif, 10
Adamts12	a disintegrin-like and metallopeptidase (reprolysin type) with thrombospondin type 1 motif, 12
Adamts13	a disintegrin-like and metallopeptidase (reprolysin type) with thrombospondin type 1 motif, 13
Adamts14	a disintegrin-like and metallopeptidase (reprolysin type) with thrombospondin type 1 motif, 14
Adamts15	a disintegrin-like and metallopeptidase (reprolysin type) with thrombospondin type 1 motif, 15
Adamts16	a disintegrin-like and metallopeptidase (reprolysin type) with thrombospondin type 1 motif, 16
Adamts17	a disintegrin-like and metallopeptidase (reprolysin type) with thrombospondin type 1 motif, 17
Adamts18	a disintegrin-like and metallopeptidase (reprolysin type) with thrombospondin type 1 motif, 18
Adamts19	a disintegrin-like and metallopeptidase (reprolysin type) with thrombospondin type 1 motif, 19
Adamts2	a disintegrin-like and metallopeptidase (reprolysin type) with thrombospondin type 1 motif, 2
Adamts20	a disintegrin-like and metallopeptidase (reprolysin type) with thrombospondin type 1 motif, 20
Adamts3	a disintegrin-like and metallopeptidase (reprolysin type) with thrombospondin type 1 motif, 3
Adamts4	a disintegrin-like and metallopeptidase (reprolysin type) with thrombospondin type 1 motif, 4
Adamts5	a disintegrin-like and metallopeptidase (reprolysin type) with thrombospondin type 1 motif, 5 (aggrecanase-2)
Adamts6	a disintegrin-like and metallopeptidase (reprolysin type) with thrombospondin type 1 motif, 6
Adamts7	a disintegrin-like and metallopeptidase (reprolysin type) with thrombospondin type 1 motif, 7
Adamts8	a disintegrin-like and metallopeptidase (reprolysin type) with thrombospondin type 1 motif, 8
Adamts9	a disintegrin-like and metallopeptidase (reprolysin type) with thrombospondin type 1 motif, 9
Adamtsl1	ADAMTS-like 1
Adamtsl2	ADAMTS-like 2
Adamtsl3	ADAMTS-like 3
Adamtsl4	ADAMTS-like 4
Adamtsl5	ADAMTS-like 5
Agt	angiotensinogen (serpin peptidase inhibitor, clade A, member 8)
AI182371	expressed sequence AI182371
Ambp	alpha 1 microglobulin/bikunin
Astl	astacin-like metalloendopeptidase (M12 family)
BC048546	cDNA sequence BC048546
BC051665	cDNA sequence BC051665
BC100530	cDNA sequence BC100530
BC117090	cDNA sequence BC1179090
Bmp1	bone morphogenetic protein 1
Cd109	CD109 antigen
Cela1	chymotrypsin-like elastase family, member 1
Cela2a	chymotrypsin-like elastase family, member 2A
Cela3b	chymotrypsin-like elastase family, member 3B
Cpn2	carboxypeptidase N, polypeptide 2
Cst10	cystatin 10 (chondrocytes)
Cst11	cystatin 11
Cst12	cystatin 12
Cst13	cystatin 13
Cst3	cystatin C
Cst6	cystatin E/M
Cst7	cystatin F (leukocystatin)
Cst8	cystatin 8 (cystatin-related epididymal spermatogenic)
Cst9	cystatin 9
Csta1	cystatin A
Cstb	cystatin B
Cstl1	cystatin-like 1
Cts3	cathepsin 3
Cts6	cathepsin 6
Cts7	cathepsin 7
Cts8	cathepsin 8
Ctsa	cathepsin A
Ctsb	cathepsin B
Ctsc	cathepsin C
Ctsd	cathepsin D
Ctse	cathepsin E
Ctsf	cathepsin F
Ctsg	cathepsin G
Ctsh	cathepsin H
Ctsj	cathepsin J
Ctsk	cathepsin K
Ctsl	cathepsin L
Ctsll3	cathepsin L-like 3
Ctsm	cathepsin M
Ctso	cathepsin O
Ctsq	cathepsin Q
Ctsr	cathepsin R
Ctss	cathepsin S
Ctsw	cathepsin W
Ctsz	cathepsin Z
Egln1	EGL nine homolog 1 (C. elegans)
Egln2	EGL nine homolog 2 (C. elegans)
Egln3	EGL nine homolog 3 (C. elegans)
Elane	elastase, neutrophil expressed
F10	coagulation factor X
F12	coagulation factor XII (Hageman factor)
F13a1	coagulation factor XIII, A1 subunit
F13b	coagulation factor XIII, beta subunit
F2	coagulation factor II
F7	coagulation factor VII
F9	coagulation factor IX
Fam20a	family with sequence similarity 20, member a
Fam20b	family with sequence similarity 20, member b
Fam20c	family with sequence similarity 20, member c
Gm10334	predicted gene 10334
Gm13011	predicted gene 13011
Gm4758	predicted gene 4758
Gm4787	predicted gene 4787
Gm5347	predicted gene 5347
Gm5409	predicted pseudogene 5409
Gm5416	predicted gene 5416
Gm5483	predicted gene 5483
Gm5771	predicted gene 5771
Habp2	hyaluronic acid binding protein 2
Hpse	heparanase
Hpse2	heparanase 2
Hrg	histidine-rich glycoprotein
Htra1	HtrA serine peptidase 1
Htra3	HtrA serine peptidase 3
Htra4	HtrA serine peptidase 4
Hyal1	hyaluronoglucosaminidase 1
Hyal2	hyaluronoglucosaminidase 2
Hyal3	hyaluronoglucosaminidase 3
Hyal4	hyaluronoglucosaminidase 4
Hyal5	hyaluronoglucosaminidase 5
Hyal6	hyaluronoglucosaminidase 6
Itih1	inter-alpha trypsin inhibitor, heavy chain 1
Itih2	inter-alpha trypsin inhibitor, heavy chain 2
Itih3	inter-alpha trypsin inhibitor, heavy chain 3
Itih4	inter alpha-trypsin inhibitor, heavy chain 4
Itih5	inter-alpha (globulin) inhibitor H5
Kazald1	Kazal-type serine peptidase inhibitor domain 1
Kng1	kininogen 1
Kng2	kininogen 2
Ky	kyphoscoliosis peptidase
Lepre1	leprecan 1
Leprel1	leprecan-like 1
Leprel2	leprecan-like 2
Lox	lysyl oxidase
Loxl1	lysyl oxidase-like 1
Loxl2	lysyl oxidase-like 2
Loxl3	lysyl oxidase-like 3
Loxl4	lysyl oxidase-like 4
Masp1	mannan-binding lectin serine peptidase 1
Masp2	mannan-binding lectin serine peptidase 2
Mep1a	meprin 1 alpha
Mep1b	meprin 1 beta
Mmp10	matrix metallopeptidase 10
Mmp11	matrix metallopeptidase 11
Mmp12	matrix metallopeptidase 12
Mmp13	matrix metallopeptidase 13
Mmp14	matrix metallopeptidase 14 (membrane-inserted)
Mmp15	matrix metallopeptidase 15
Mmp16	matrix metallopeptidase 16
Mmp17	matrix metallopeptidase 17
Mmp19	matrix metallopeptidase 19
Mmp1a	matrix metallopeptidase 1a (interstitial collagenase)
Mmp1b	matrix metallopeptidase 1b (interstitial collagenase)
Mmp2	matrix metallopeptidase 2
Mmp20	matrix metallopeptidase 20 (enamelysin)
Mmp21	matrix metallopeptidase 21
Mmp23	matrix metallopeptidase 23
Mmp24	matrix metallopeptidase 24
Mmp25	matrix metallopeptidase 25
Mmp27	matrix metallopeptidase 27
Mmp28	matrix metallopeptidase 28 (epilysin)
Mmp3	matrix metallopeptidase 3
Mmp7	matrix metallopeptidase 7
Mmp8	matrix metallopeptidase 8
Mmp9	matrix metallopeptidase 9
Mug2	C3 and PZP-like, alpha-2-macroglobulin domain containing 8
Ngly1	N-glycanase 1
Ogfod1	2-oxoglutarate and iron-dependent oxygenase domain containing 1
Ogfod2	2-oxoglutarate and iron-dependent oxygenase domain containing 2
P4ha1	procollagen-proline, 2-oxoglutarate 4-dioxygenase (proline 4-hydroxylase), alpha 1 polypeptide
P4ha2	procollagen-proline, 2-oxoglutarate 4-dioxygenase (proline 4-hydroxylase), alpha II polypeptide
P4ha3	procollagen-proline, 2-oxoglutarate 4-dioxygenase (proline 4-hydroxylase), alpha polypeptide III
P4htm	prolyl 4-hydroxylase, transmembrane (endoplasmic reticulum)
Pamr1	peptidase domain containing associated with muscle regeneration 1
Pappa	pregnancy-associated plasma protein A
Pappa2	pappalysin 2
Pcsk5	proprotein convertase subtilisin/kexin type 5
Pcsk6	proprotein convertase subtilisin/kexin type 6
Plat	plasminogen activator, tissue
Plau	plasminogen activator, urokinase
Plg	plasminogen
Plod1	procollagen-lysine, 2-oxoglutarate 5-dioxygenase 1
Plod2	procollagen lysine, 2-oxoglutarate 5-dioxygenase 2
Plod3	procollagen-lysine, 2-oxoglutarate 5-dioxygenase 3
Prss1	protease, serine, 1 (trypsin 1)
Prss12	protease, serine, 12 neurotrypsin (motopsin)
Prss2	protease, serine, 2
Prss3	protease, serine, 3
Pzp	pregnancy zone protein
Serpina10	serine (or cysteine) peptidase inhibitor, clade A (alpha-1 antiproteinase, antitrypsin), member 10
Serpina11	serine (or cysteine) peptidase inhibitor, clade A (alpha-1 antiproteinase, antitrypsin), member 11
Serpina12	serine (or cysteine) peptidase inhibitor, clade A (alpha-1 antiproteinase, antitrypsin), member 12
Serpina1a	serine (or cysteine) peptidase inhibitor, clade A, member 1A
Serpina1b	serine (or cysteine) preptidase inhibitor, clade A, member 1B
Serpina1c	serine (or cysteine) peptidase inhibitor, clade A, member 1C
Serpina1d	serine (or cysteine) peptidase inhibitor, clade A, member 1D
Serpina1e	serine (or cysteine) peptidase inhibitor, clade A, member 1E
Serpina1f	serine (or cysteine) peptidase inhibitor, clade A, member 1F
Serpina3a	serine (or cysteine) peptidase inhibitor, clade A, member 3A
Serpina3b	serine (or cysteine) peptidase inhibitor, clade A, member 3B
Serpina3c	serine (or cysteine) peptidase inhibitor, clade A, member 3C
Serpina3f	serine (or cysteine) peptidase inhibitor, clade A, member 3F
Serpina3g	serine (or cysteine) peptidase inhibitor, clade A, member 3G
Serpina3k	serine (or cysteine) peptidase inhibitor, clade A, member 3K
Serpina3m	serine (or cysteine) peptidase inhibitor, clade A, member 3M
Serpina3n	serine (or cysteine) peptidase inhibitor, clade A, member 3N
Serpina5	serine (or cysteine) peptidase inhibitor, clade A, member 5
Serpina6	serine (or cysteine) peptidase inhibitor, clade A, member 6
Serpina7	serine (or cysteine) peptidase inhibitor, clade A (alpha-1 antiproteinase, antitrypsin), member 7
Serpina9	serine (or cysteine) peptidase inhibitor, clade A (alpha-1 antiproteinase, antitrypsin), member 9
Serpinb10	serine (or cysteine) peptidase inhibitor, clade B (ovalbumin), member 10
Serpinb11	serine (or cysteine) peptidase inhibitor, clade B (ovalbumin), member 11
Serpinb12	serine (or cysteine) peptidase inhibitor, clade B (ovalbumin), member 12
Serpinb13	serine (or cysteine) peptidase inhibitor, clade B (ovalbumin), member 13
Serpinb1a	serine (or cysteine) peptidase inhibitor, clade B, member 1a
Serpinb1b	serine (or cysteine) peptidase inhibitor, clade B, member 1b
Serpinb1c	serine (or cysteine) peptidase inhibitor, clade B, member 1c
Serpinb2	serine (or cysteine) peptidase inhibitor, clade B, member 2
Serpinb3a	serine (or cysteine) peptidase inhibitor, clade B (ovalbumin), member 3A
Serpinb3b	serine (or cysteine) peptidase inhibitor, clade B (ovalbumin), member 3B
Serpinb3c	serine (or cysteine) peptidase inhibitor, clade B, member 3C
Serpinb3d	serine (or cysteine) peptidase inhibitor, clade B (ovalbumin), member 3D
Serpinb5	serine (or cysteine) peptidase inhibitor, clade B, member 5
Serpinb6a	serine (or cysteine) peptidase inhibitor, clade B, member 6a
Serpinb6b	serine (or cysteine) peptidase inhibitor, clade B, member 6b
Serpinb6c	serine (or cysteine) peptidase inhibitor, clade B, member 6c
Serpinb6d	serine (or cysteine) peptidase inhibitor, clade B, member 6d
Serpinb7	serine (or cysteine) peptidase inhibitor, clade B, member 7
Serpinb8	serine (or cysteine) peptidase inhibitor, clade B, member 8
Serpinb9	serine (or cysteine) peptidase inhibitor, clade B, member 9
Serpinb9b	serine (or cysteine) peptidase inhibitor, clade B, member 9b
Serpinb9c	serine (or cysteine) peptidase inhibitor, clade B, member 9c
Serpinb9d	serine (or cysteine) peptidase inhibitor, clade B, member 9d
Serpinb9e	serine (or cysteine) peptidase inhibitor, clade B, member 9e
Serpinb9f	serine (or cysteine) peptidase inhibitor, clade B, member 9f
Serpinb9g	serine (or cysteine) peptidase inhibitor, clade B, member 9g
Serpinc1	serine (or cysteine) peptidase inhibitor, clade C (antithrombin), member 1
Serpind1	serine (or cysteine) peptidase inhibitor, clade D, member 1
Serpine1	serine (or cysteine) peptidase inhibitor, clade E, member 1
Serpine2	serine (or cysteine) peptidase inhibitor, clade E, member 2
Serpine3	serpin peptidase inhibitor, clade E (nexin, plasminogen activator inhibitor type 1), member 3
Serpinf1	serine (or cysteine) peptidase inhibitor, clade F, member 1
Serpinf2	serine (or cysteine) peptidase inhibitor, clade F, member 2
Serping1	serine (or cysteine) peptidase inhibitor, clade G, member 1
Serpinh1	serine (or cysteine) peptidase inhibitor, clade H, member 1
Serpini1	serine (or cysteine) peptidase inhibitor, clade I, member 1
Serpini2	serine (or cysteine) peptidase inhibitor, clade I, member 2
Slpi	secretory leukocyte peptidase inhibitor
Spam1	sperm adhesion molecule 1
Spinkl	RIKEN cDNA 9530002K18 gene
St14	suppression of tumorigenicity 14 (colon carcinoma)
Stfa1	stefin A1
Stfa2	stefin A2
Stfa2l1	stefin A2 like 1
Stfa3	stefin A3
Sulf1	sulfatase 1
Sulf2	sulfatase 2
Tgm1	transglutaminase 1, K polypeptide
Tgm2	transglutaminase 2, C polypeptide
Tgm3	transglutaminase 3, E polypeptide
Tgm4	transglutaminase 4 (prostate)
Tgm5	transglutaminase 5
Tgm6	transglutaminase 6
Tgm7	transglutaminase 7
Timp1	tissue inhibitor of metalloproteinase 1
Timp2	tissue inhibitor of metalloproteinase 2
Timp3	tissue inhibitor of metalloproteinase 3
Timp4	tissue inhibitor of metalloproteinase 4
Tll1	tolloid-like
Tll2	tolloid-like 2
Tmprss15	protease, serine, 7 (enterokinase)
Tpbpa	trophoblast specific protein alpha
Tpbpb	trophoblast specific protein beta
Try10	trypsin 10
Try4	trypsin 4
Try5	trypsin 5
U06147	cDNA sequence U06147
Amh	anti-Mullerian hormone
Angpt1	angiopoietin 1
Angpt2	angiopoietin 2
Angpt4	angiopoietin 4
Angptl1	angiopoietin-like 1
Angptl2	angiopoietin-like 2
Angptl3	angiopoietin-like 3
Angptl4	angiopoietin-like 4
Angptl6	angiopoietin-like 6
Angptl7	angiopoietin-like 7
Areg	amphiregulin
Artn	artemin
Bdnf	brain derived neurotrophic factor
Bmp10	bone morphogenetic protein 10
Bmp15	bone morphogenetic protein 15
Bmp2	bone morphogenetic protein 2
Bmp3	bone morphogenetic protein 3
Bmp4	bone morphogenetic protein 4
Bmp5	bone morphogenetic protein 5
Bmp6	bone morphogenetic protein 6
Bmp7	bone morphogenetic protein 7
Bmp8a	bone morphogenetic protein 8a
Bmp8b	bone morphogenetic protein 8b
Brinp2	family with sequence similarity 5, member B
Brinp3	family with sequence similarity 5, member C
Btc	betacellulin, epidermal growth factor family member
Cbln1	cerebellin 1 precursor protein
Cbln2	cerebellin 2 precursor protein
Cbln3	cerebellin 3 precursor protein
Cbln4	cerebellin 4 precursor protein
Ccbe1	collagen and calcium binding EGF domains 1
Ccl1	chemokine (C-C motif) ligand 1
Ccl11	chemokine (C-C motif) ligand 11
Ccl12	chemokine (C-C motif) ligand 12
Ccl17	chemokine (C-C motif) ligand 17
Ccl19	chemokine (C-C motif) ligand 19
Ccl2	chemokine (C-C motif) ligand 2
Ccl20	chemokine (C-C motif) ligand 20
Ccl21a	chemokine (C-C motif) ligand 21A
Ccl21b	chemokine (C-C motif) ligand 21B
Ccl21c	chemokine (C-C motif) ligand 21C (leucine)
Ccl22	chemokine (C-C motif) ligand 22
Ccl24	chemokine (C-C motif) ligand 24
Ccl25	chemokine (C-C motif) ligand 25
Ccl26	chemokine (C-C motif) ligand 26
Ccl27a	chemokine (C-C motif) ligand 27A
Ccl28	chemokine (C-C motif) ligand 28
Ccl3	chemokine (C-C motif) ligand 3
Ccl4	chemokine (C-C motif) ligand 4
Ccl5	chemokine (C-C motif) ligand 5
Ccl6	chemokine (C-C motif) ligand 6
Ccl7	chemokine (C-C motif) ligand 7
Ccl8	chemokine (C-C motif) ligand 8
Ccl9	chemokine (C-C motif) ligand 9
Cfc1	cripto, FRL-1, cryptic family 1
Chrd	chordin
Chrdl1	chordin-like 1
Chrdl2	chordin-like 2
Clcf1	cardiotrophin-like cytokine factor 1
Cntf	ciliary neurotrophic factor
Crhbp	corticotropin releasing hormone binding protein
Crlf1	cytokine receptor-like factor 1
Crlf3	cytokine receptor-like factor 3
Crnn	cornulin
Csf1	colony stimulating factor 1 (macrophage)
Csf2	colony stimulating factor 2 (granulocyte-macrophage)
Csf3	colony stimulating factor 3 (granulocyte)
Ctf1	cardiotrophin 1
Ctf2	cardiotrophin 2
Cx3cl1	chemokine (C-X3-C motif) ligand 1
Cxcl1	chemokine (C-X-C motif) ligand 1
Cxcl10	chemokine (C-X-C motif) ligand 10
Cxcl11	chemokine (C-X-C motif) ligand 11
Cxcl12	chemokine (C-X-C motif) ligand 12
Cxcl13	chemokine (C-X-C motif) ligand 13
Cxcl14	chemokine (C-X-C motif) ligand 14
Cxcl15	chemokine (C-X-C motif) ligand 15
Cxcl2	chemokine (C-X-C motif) ligand 2
Cxcl3	chemokine (C-X-C motif) ligand 3
Cxcl5	chemokine (C-X-C motif) ligand 5
Cxcl9	chemokine (C-X-C motif) ligand 9
Dhh	desert hedgehog
Ebi3	Epstein-Barr virus induced gene 3
Eda	ectodysplasin-A
Egf	epidermal growth factor
Egfl6	EGF-like-domain, multiple 6
Egfl7	EGF-like domain 7
Egfl8	EGF-like domain 8
Epgn	epithelial mitogen
Epo	erythropoietin
Ereg	epiregulin
Fam132a	family with sequence similarity 132, member A
Fam132b	family with sequence similarity 132, member B
Fasl	Fas ligand (TNF superfamily, member 6)
Fgf1	fibroblast growth factor 1
Fgf10	fibroblast growth factor 10
Fgf11	fibroblast growth factor 11
Fgf12	fibroblast growth factor 12
Fgf13	fibroblast growth factor 13
Fgf14	fibroblast growth factor 14
Fgf15	fibroblast growth factor 15
Fgf16	fibroblast growth factor 16
Fgf17	fibroblast growth factor 17
Fgf18	fibroblast growth factor 18
Fgf2	fibroblast growth factor 2
Fgf20	fibroblast growth factor 20
Fgf21	fibroblast growth factor 21
Fgf22	fibroblast growth factor 22
Fgf23	fibroblast growth factor 23
Fgf3	fibroblast growth factor 3
Fgf4	fibroblast growth factor 4
Fgf5	fibroblast growth factor 5
Fgf6	fibroblast growth factor 6
Fgf7	fibroblast growth factor 7
Fgf8	fibroblast growth factor 8
Fgf9	fibroblast growth factor 9
Fgfbp1	fibroblast growth factor binding protein 1
Fgfbp3	fibroblast growth factor binding protein 3
Figf	c-fos induced growth factor
Flg	filaggrin
Flg2	filaggrin family member 2
Flt3l	FMS-like tyrosine kinase 3 ligand
Frzb	frizzled-related protein
Fst	follistatin
Fstl1	follistatin-like 1
Fstl3	follistatin-like 3
Gdf1	growth differentiation factor 1
Gdf10	growth differentiation factor 10
Gdf11	growth differentiation factor 11
Gdf15	growth differentiation factor 15
Gdf2	growth differentiation factor 2
Gdf3	growth differentiation factor 3
Gdf5	growth differentiation factor 5
Gdf6	growth differentiation factor 6
Gdf7	growth differentiation factor 7
Gdf9	growth differentiation factor 9
Gdnf	glial cell line derived neurotrophic factor
Gh	growth hormone
Gm13271	predicted gene 13271
Gm13272	predicted gene 13272
Gm13275	predicted gene 13275
Gm13276	predicted gene 13276
Gm13277	predicted gene 13277
Gm13278	predicted gene 13278
Gm13279	predicted gene 13279
Gm13283	predicted gene 13283
Gm13285	predicted gene 13285
Gm13287	predicted gene 13287
Gm13288	predicted gene 13288
Gm13289	predicted gene 13289
Gm13290	predicted gene 13290
Gm13306	predicted gene 13306
Gm5849	predicted gene 5849
Hbegf	heparin-binding EGF-like growth factor
Hcfc1	host cell factor C1
Hcfc2	host cell factor C2
Hgf	hepatocyte growth factor
Hgfac	hepatocyte growth factor activator
Hhip	Hedgehog-interacting protein
Hrnr	hornerin
Ifna1	interferon alpha 1
Ifna11	interferon alpha 11
Ifna12	interferon alpha 12
Ifna13	interferon alpha 13
Ifna14	interferon, alpha 14
Ifna15	predicted gene 12597
Ifna16	predicted gene 13280
Ifna2	interferon alpha 2
Ifna4	interferon alpha 4
Ifna5	interferon alpha 5
Ifna6	interferon alpha 6
Ifna7	interferon alpha 7
Ifna9	interferon alpha 9
Ifnab	interferon alpha B
Ifnb1	interferon beta 1, fibroblast
Ifne	interferon epsilon
Ifng	interferon gamma
Ifnk	interferon kappa
Ifnz	interferon zeta
Igf1	insulin-like growth factor 1
Igf2	insulin-like growth factor 2
Ihh	Indian hedgehog
Il10	interleukin 10
Il11	interleukin 11
Il12a	interleukin 12a
Il12b	interleukin 12b
Il13	interleukin 13
Il15	interleukin 15
Il16	interleukin 16
Il17a	interleukin 17A
Il17b	interleukin 17B
Il17c	interleukin 17C
Il17d	interleukin 17D
Il17f	interleukin 17F
Il18	interleukin 18
Il19	interleukin 19
Il1a	interleukin 1 alpha
Il1b	interleukin 1 beta
Il1f10	interleukin 1 family, member 10
Il1f5	interleukin 1 family, member 5 (delta)
Il1f6	interleukin 1 family, member 6
Il1f8	interleukin 1 family, member 8
Il1f9	interleukin 1 family, member 9
Il1rn	interleukin 1 receptor antagonist
Il2	interleukin 2
Il20	interleukin 20
Il22	interleukin 22
Il23a	interleukin 23, alpha subunit p19
Il24	interleukin 24
Il25	interleukin 25
Il3	interleukin 3
Il34	interleukin 34
Il4	interleukin 4
Il5	interleukin 5
Il6	interleukin 6
Il7	interleukin 7
Il9	interleukin 9
Inha	inhibin alpha
Inhba	inhibin beta-A
Inhbb	inhibin beta-B
Inhbc	inhibin beta-C
Inhbe	inhibin beta E
Ins1	insulin I
Ins2	insulin II
Insl3	insulin-like 3
Insl5	insulin-like 5
Insl6	insulin-like 6
Ism1	isthmin 1 homolog (zebrafish)
Ism2	isthmin 2 homolog (zebrafish)
Kitl	kit ligand
Lefty1	left right determination factor 1
Lefty2	left-right determination factor 2
Lep	leptin
Lif	leukemia inhibitory factor
Lta	lymphotoxin A
Ltb	lymphotoxin B
Mdk	midkine
Megf10	multiple EGF-like-domains 10
Megf11	multiple EGF-like-domains 11
Megf6	multiple EGF-like-domains 6
Megf8	multiple EGF-like-domains 8
Megf9	multiple EGF-like-domains 9
Mst1	macrophage stimulating 1 (hepatocyte growth factor-like)
Mstn	myostatin
Ngf	nerve growth factor
Nodal	nodal
Nrg1	neuregulin 1
Nrg2	neuregulin 2
Nrg3	neuregulin 3
Nrg4	neuregulin 4
Nrtn	neurturin
Ntf3	neurotrophin 3
Ntf5	neurotrophin 5
Osm	oncostatin M
Pdgfa	platelet derived growth factor, alpha
Pdgfb	platelet derived growth factor, B polypeptide
Pdgfc	platelet-derived growth factor, C polypeptide
Pdgfd	platelet-derived growth factor, D polypeptide
Pf4	platelet factor 4
Pgf	placental growth factor
Pik3ip1	phosphoinositide-3-kinase interacting protein 1
Ppbp	pro-platelet basic protein
Prl	prolactin
Prl2a1	prolactin family 2, subfamily a, member 1
Prl2b1	prolactin family 2, subfamily b, member 1
Prl2c1	Prolactin family 2, subfamily c, member 1
Prl2c2	prolactin family 2, subfamily c, member 2
Prl2c3	prolactin family 2, subfamily c, member 3
Prl2c4	prolactin family 2, subfamily c, member 4
Prl2c5	prolactin family 2, subfamily c, member 5
Prl3a1	prolactin family 3, subfamily a, member 1
Prl3b1	prolactin family 3, subfamily b, member 1
Prl3c1	prolactin family 3, subfamily c, member 1
Prl3d1	prolactin family 3, subfamily d, member 1
Prl3d2	prolactin family 3, subfamily d, member 1
Prl3d3	prolactin family 3, subfamily d, member 3
Prl4a1	prolactin family 4, subfamily a, member 1
Prl5a1	prolactin family 5, subfamily a, member 1
Prl6a1	prolactin family 6, subfamily a, member 1
Prl7a1	prolactin family 7, subfamily a, member 1
Prl7a2	prolactin family 7, subfamily a, member 2
Prl7b1	prolactin family 7, subfamily b, member 1
Prl7c1	prolactin family 7, subfamily c, member 1
Prl7d1	prolactin family 7, subfamily d, member 1
Prl8a1	prolactin family 8, subfamily a, member 1
Prl8a2	prolactin family 8, subfamily a, member 2
Prl8a6	prolactin family 8, subfamily a, member 6
Prl8a8	prolactin family 8, subfamily a, member 81
Prl8a9	prolactin family8, subfamily a, member 9
Pspn	persephin
Ptn	pleiotrophin
Rptn	repetin
S100a1	S100 calcium binding protein A1
S100a10	S100 calcium binding protein A10 (calpactin)
S100a11	S100 calcium binding protein A11 (calgizzarin)
S100a13	S100 calcium binding protein A13
S100a14	S100 calcium binding protein A14
S100a16	S100 calcium binding protein A16
S100a2	S100 calcium binding protein A2
S100a3	S100 calcium binding protein A3
S100a4	S100 calcium binding protein A4
S100a5	S100 calcium binding protein A5
S100a6	S100 calcium binding protein A6 (calcyclin)
S100a7a	S100 calcium binding protein A7A
S100a8	S100 calcium binding protein A8 (calgranulin A)
S100a9	S100 calcium binding protein A9 (calgranulin B)
S100b	S100 protein, beta polypeptide, neural
S100g	S100 calcium binding protein G
S100z	S100 calcium binding protein, zeta
Scube1	signal peptide, CUB domain, EGF-like 1
Scube2	signal peptide, CUB domain, EGF-like 2
Scube3	signal peptide, CUB domain, EGF-like 3
Sfrp1	secreted frizzled-related protein 1
Sfrp2	secreted frizzled-related protein 2
Sfrp4	secreted frizzled-related protein 4
Sfrp5	secreted frizzled-related sequence protein 5
Shh	sonic hedgehog
Tchh	trichohyalin
Tchhl1	trichohyalin-like 1
Tdgf1	teratocarcinoma-derived growth factor 1
Tgfa	transforming growth factor alpha
Tgfb1	transforming growth factor, beta 1
Tgfb2	transforming growth factor, beta 2
Tgfb3	transforming growth factor, beta 3
Thpo	thrombopoietin
Tnf	tumor necrosis factor
Tnfsf10	tumor necrosis factor (ligand) superfamily, member 10
Tnfsf11	tumor necrosis factor (ligand) superfamily, member 11
Tnfsf12	tumor necrosis factor (ligand) superfamily, member 12
Tnfsf12tnfsf13	cDNA sequence BC096441
Tnfsf13	tumor necrosis factor (ligand) superfamily, member 13
Tnfsf13b	tumor necrosis factor (ligand) superfamily, member 13b
Tnfsf14	tumor necrosis factor (ligand) superfamily, member 14
Tnfsf15	tumor necrosis factor (ligand) superfamily, member 15
Tnfsf18	tumor necrosis factor (ligand) superfamily, member 18
Tnfsf4	tumor necrosis factor (ligand) superfamily, member 4
Tnfsf8	tumor necrosis factor (ligand) superfamily, member 8
Tnfsf9	tumor necrosis factor (ligand) superfamily, member 9
Tpo	thyroid peroxidase
Vegfa	vascular endothelial growth factor A
Vegfb	vascular endothelial growth factor B
Vegfc	vascular endothelial growth factor C
Vwc2	von Willebrand factor C domain containing 2
Vwc2l	von Willebrand factor C domain-containing protein 2-like
Wfikkn1	WAP, FS, Ig, KU, and NTR-containing protein 1
Wfikkn2	WAP, follistatin/kazal, immunoglobulin, kunitz and netrin domain containing 2
Wif1	Wnt inhibitory factor 1
Wnt1	wingless-related MMTV integration site 1
Wnt10a	wingless related MMTV integration site 10a
Wnt10b	wingless related MMTV integration site 10b
Wnt11	wingless-related MMTV integration site 11
Wnt16	wingless-related MMTV integration site 16
Wnt2	wingless-related MMTV integration site 2
Wnt2b	wingless related MMTV integration site 2b
Wnt3	wingless-related MMTV integration site 3
Wnt3a	wingless-related MMTV integration site 3A
Wnt4	wingless-related MMTV integration site 4
Wnt5a	wingless-related MMTV integration site 5A
Wnt5b	wingless-related MMTV integration site 5B
Wnt6	wingless-related MMTV integration site 6
Wnt7a	wingless-related MMTV integration site 7A
Wnt7b	wingless-related MMTV integration site 7B
Wnt8a	wingless-related MMTV integration site 8A
Wnt8b	wingless related MMTV integration site 8b
Wnt9a	wingless-type MMTV integration site 9A
Wnt9b	wingless-type MMTV integration site 9B
Xcl1	chemokine (C motif) ligand 1
1110031I02Rik	RIKEN cDNA 1110031I02 gene
Ccl16-ps	chemokine (C-C motif) ligand 16, pseudogene
E030019B13Rik	RIKEN cDNA E030019B13 gene
Gm13286	predicted gene 13286
Gm13308	predicted gene 13308
Gm5065	predicted gene 5065
Gm8080	predicted gene 8080
Ifna10	interferon alpha 10
Itih5l-ps	inter-alpha (globulin) inhibitor H5-like
Muc12	mucin 12
Serpina3h	serine (or cysteine) peptidase inhibitor, clade A, member 3H
Serpina4-ps1	serine (or cysteine) peptidase inhibitor, clade A, member 4, pseudogene 1
Tnxa	tenascin XA
Zfp91-Cntf	Zfp91-Cntf readthrough transcript
Zp4-ps	zona pellucida glycoprotein 4, pseudogene

## Sheet: 3. GAG matches
Gene Description	Acomys D5	Acomys D10	Acomys D15			Preparation of Linkage region
Hmcn1	0.571361	1.28813	1.90841			Gene symbol	function	Acomys D5	Acomys D10	Acomys D15
Dchs1	0.188011	1.53548	1.90191			B3galt6	Transferring UDP‐galactose to galactose‐xylose on proteoglycan	0.890511	0.587375	0.544729
Svep1	0.425944	0.0401295	-0.364018			B3gat1	Transferring UDP‐GlcA to galactose‐galactose‐xylose on proteoglycan	#N/A	#N/A	#N/A
Fat1	0.317705	0.55137	0.936826			B3gat2	Transferring UDP‐GlcA to galactose‐galactose‐xylose on proteoglycan	-7.80044	-2.76441	-1.27973
Birc6	0.197837	0.126459	0.0375865			B3gat3	Transferring UDP‐GlcA to galactose‐galactose‐xylose on proteoglycan	0.104884	0.18227	0.0810408
Celsr1	0.107605	-0.269923	-0.476634			B4galt2	Transfering UDP‐galactose to GlcNAc, Glc, and Xyl.	1.52332	1.83186	1.81435
Celsr2	-0.0314629	-0.180888	-0.461358			B4galt7	Transferring UDP‐galactose to xylose on proteoglycan	0.217899	0.538809	0.407445
Megf8	0.123306	0.661539	0.922937			Xylt1	Transferring UDP‐xylose to proteoglycan	#N/A	#N/A	#N/A
Fbn2	-0.571605	1.76009	2.56539			Xylt2	Transferring UDP‐xylose to proteoglycan	#N/A	#N/A	#N/A
Utrn	-0.938664	-0.495461	-0.582278
Ankhd1	0.140841	-0.124932	-0.260056			Glycosaminoglycan chain polimerisation
Nsd1	0.102064	0.0493288	0.0510163			Gene symbol	function	Acomys D5	Acomys D10	Acomys D15
Setd2	-0.088041	-0.0856746	-0.106067			Chpf	Transferring UDP‐GlcA to GalNAc at end of sugar chain (CS)	-0.0415396	0.951035	1.0984
Dock11	-0.358603	-0.383406	-0.477243			Chsy1	Transferring UDP‐GlcA to GalNAc at end of sugar chain (CS)	1.13056	1.62172	1.67097
Tanc2	0.262319	0.169868	0.255518			Chsy3	Transferring UDP‐GlcA to GalNAc at end of sugar chain (CS)	0.425082	1.50279	1.34738
Ryr1	-1.31957	-0.917243	-0.8597			Csgalnact1	Transferring UDP‐GalNAc to GlcA at end of sugar chain (CS)	0.0584297	-0.11164	-0.115066
Snrnp2	0.448014	-0.0220129	-0.0487171			Csgalnact2	Transferring UDP‐GalNAc to GlcA at end of sugar chain (CS)	#N/A	#N/A	#N/A
Utp2	0.650796	0.113023	-0.0275837			Ext1	Transferring UDP‐GlcNAc to GlcA at end of sugar chain (HS)	0.816665	0.649367	0.528352
Sorl1	1.28737	-0.350898	-0.332004			Ext2	Transferring UDP‐GlcNAc to GlcA at end of sugar chain (HS)	0.77512	1.07762	1.00009
Dsp	0.464807	-0.0584839	-0.437457			Extl1	Transferring UDP‐GlcA to GlcNAc at end of sugar chain (HS)	-1.51716	-1.68242	-2.04842
26157B11Rik	0.676041	0.506891	0.417047			Extl2	Transferring UDP‐GlcA to GlcNAc at end of sugar chain (HS)	-0.0794587	0.117294	0.297893
Hivep2	-0.375495	-0.289342	-0.0734139			Extl3	Transferring UDP‐GlcA to GlcNAc at end of sugar chain (HS)	0.305508	0.15209	0.170329
	0.322879	0.03404	-0.0781157			Has1	Polymerisation of hyaluronic acid	1.91262	-1.08763	-0.01948
Fat2	0.694524	-0.217132	-0.240943			Has2	Polymerisation of hyaluronic acid	2.28025	1.59855	1.59407
	0.676185	0.302388	0.120202			Has3	Polymerisation of hyaluronic acid	3.43121	1.08539	0.887772
Hipk3	-0.0206957	-0.227346	-0.37807
Cep29	-0.262469	-0.230933	-0.137606			Glycsaminoglycan chain modification
Abca2	-0.812635	-0.394353	-0.368755			Gene symbol	function	Acomys D5	Acomys D10	Acomys D15
Herc2	0.0877089	0.178092	0.108056			Chst11	Sulfation at the 4‐O postion of GalNAc untis (CS)	1.09607	0.509669	0.45396
Mll1	-0.260357	-0.288825	-0.204317			Chst12	Sulfation at the 4‐O postion of GalNAc untis (CS)	0.842454	0.550709	0.523769
Nbeal1	-0.946709	-0.687351	-0.70166			Chst13	Sulfation at the 4‐O postion of GalNAc untis (CS)	#N/A	#N/A	#N/A
Myof	0.457624	0.540143	0.411221			Chst14	Sulfation at the 4‐O postion of GalNAc untis (CS)	0.85155	1.30347	1.41805
Speg	-1.59435	-0.316984	0.0883307			Chst15	Sulfation at the 6‐O postion of GalNAc untis (CS)	-0.610831	-0.72221	-0.79359
Spnb2	-0.764756	-0.790627	-0.832318			Chst2	Sulfation at the 6‐O postion of GalNAc untis (CS)	1.21443	1.82714	2.36727
Mtap1b	-0.0560985	0.422783	0.33482			Chst3	Sulfation at the 6‐O postion of GalNAc untis (CS)	0.973531	1.12093	0.984732
Dync1h1	0.396779	0.322733	0.253928			Chst4	Sulfation at the 6‐O postion of GalNAc untis (CS)	#N/A	#N/A	#N/A
Dmxl2	1.91936	1.0322	1.09808			Chst5	Sulfation at the 6‐O postion of GalNAc untis (CS)	-2.20571	-3.90446	-2.70147
Nhs	-0.0733393	0.173413	0.241776			Chst7	Sulfation at the 6‐O postion of GalNAc untis (CS)	-0.39666	-0.0457103	-0.204075
Chd8	0.00540923	0.0292707	0.0322774			Chst8	Sulfation at the 4‐O postion of GalNAc untis (CS)	#N/A	#N/A	#N/A
Rai1	-0.566132	-0.365405	0.0306877			Chst9	Sulfation at the 4‐O postion of GalNAc untis (CS)	#N/A	#N/A	#N/A
Cnot1	0.441779	0.13084	0.0280613			Dse	Epimerisation of GlcA unit into iduronic acid unit (IdoA) (CS)	#N/A	#N/A	#N/A
Col6a6	-2.16231	-0.024279	0.68285			Glce	pimerisation of GlcA unit into iduronic acid unit (IdoA) (HS)	0.165121	0.0972334	0.152494
Upf2	-0.121091	-0.25427	-0.371063			Hs2st1	Sulfation at the 2‐O position of GlcA and IdoA units (HS)	0.438342	0.679251	0.852553
Zfp462	-1.48735	-0.819163	-0.576256			Hs3st1	Sulfation at the 3‐O position of GlcNAc and GlcNS units sulfated at the 6‐O position (HS)	0.871127	0.295854	-0.186816
Acacb	-0.384812	-0.571858	-0.974101			Hs3st2	Sulfation at the 3‐O position of GlcNAc and GlcNS units sulfated at the 6‐O position (HS)	#N/A	#N/A	#N/A
Syncrip	-0.471427	-0.593347	-0.431519			Hs3st3a1	Sulfation at the 3‐O position of GlcNAc and GlcNS units sulfated at the 6‐O position (HS)	#N/A	#N/A	#N/A
Trrap	0.31921	0.309013	0.457114			Hs3st3b1	Sulfation at the 3‐O position of GlcNAc and GlcNS units sulfated at the 6‐O position (HS)	0.0518134	-0.542666	-0.938551
Itpr2	0.451211	0.368646	0.140956			Hs3st6	Sulfation at the 3‐O position of GlcNAc and GlcNS units sulfated at the 6‐O position (HS)	-0.0528643	-0.0595958	-0.422261
Col4a5	-1.31863	-0.701184	-0.480214			Hs6st1	Sulfation at the 6‐O position of GlcNAc and N‐sulfated‐glucuronic acid units (GlcNS) (HS)	0.517015	0.228544	0.0167851
Bcl9	-0.0631306	0.225091	0.514034			Hs6st2	Sulfation at the 6‐O position of GlcNAc and GlcNS units (HS)	0.564754	1.29646	1.02798
Col14a1	-0.695602	0.86316	1.37476			Hs6st3	Sulfation at the 6‐O position of GlcNAc and GlcNS units (HS)	0.811694	1.3248	1.81225
Dmxl1	0.333267	0.0789456	-0.183722			Ndst1	N‐de‐acetylation and N‐sulfation of GlcNAc unit (HS)	0.529296	0.82637	0.884005
Lrrk2	0.888014	0.311705	0.458005			Ndst2	N‐de‐acetylation and N‐sulfation of GlcNAc unit (HS)	0.30654	0.396062	0.494628
Lrp1	0.77002	0.399208	0.23263			Ndst3	N‐de‐acetylation and N‐sulfation of GlcNAc unit (HS)	#N/A	#N/A	#N/A
Znfx1	0.346922	-0.024738	-0.111815			Ndst4	N‐de‐acetylation and N‐sulfation of GlcNAc unit (HS)	#N/A	#N/A	#N/A
Fat4	-1.29248	-0.0576629	0.574877			Sulf1	Desulfation of the 6‐O positon of 6‐O sulfated GlcNAc and GlcNS units (HS)	0.321921	0.706421	0.405431
Ppl	0.140063	0.192041	-0.04962			Sulf2	Desulfation of the 6‐O positon of 6‐O sulfated GlcNAc and GlcNS units (HS)	#N/A	#N/A	#N/A
Fn1	1.69882	4.04951	3.63086			Sumf1	Cofactor for Sulf1 and Sulf 2 (HS)	-0.0021451	0.177652	0.0772854
Tln1	1.08424	0.964121	0.897975			Sumf2	Cofactor for Sulf1 and Sulf 2 (HS)	-0.408448	-0.215633	-0.430071
Igf1r	0.114022	-0.167586	-0.276655			Ust	Sulfation at the 2‐O position of GlcA and IdoA units (CS)	#N/A	#N/A	#N/A
Ash1l	-0.215551	-0.337098	-0.358458
Nova1	-0.647287	0.244271	0.621988			Glycosaminoglycan chain degradation
Ahdc1	-0.244425	-0.072582	-0.0425687			Gene symbol	function	Acomys D5	Acomys D10	Acomys D15
Srrm2	0.327268	-0.0116006	0.0303944			Arsb	Desulfation of the 4‐O position of 4‐O sulfated GalNAc units (CS)	0.654175	1.4244	1.38291
Rere	-0.14274	-0.307892	-0.0773677			Arsj	Desulfation of the 4‐O position of 4‐O sulfated GalNAc units (CS)	0.484174	-0.00862361	0.194621
Bcorl1	-0.454215	-0.194362	-0.0395669			Arsk	Desulfation of proteoglycans, paralog of IDS	-0.661515	-0.876769	-1.16181
Spnb3	0.172584	-0.105962	-0.394554			Galns	Desulfation of the 6‐O positon of 6‐O sulfated GalNAc units (CS)	1.77823	1.29269	1.25022
Grlf1	-0.239475	-0.110048	0.0972332			Gns	Desulfation of the 6‐O positon of 6‐O sulfated GlcNAc and GlcNS units (HS)	#N/A	#N/A	#N/A
Atrn	0.172921	0.163755	0.110532			Gusb	Hydrolysation of GlcA from sugar chain (HS and Hyaluronic acid and CS)	1.46338	1.05453	1.03817
Trip11	-0.0378173	0.0316608	0.0226158			Hexa	Hydrolysation of GalNAc units (CS) and GlcNAc untis (hyaluronic acid) from sugar chain	0.385769	0.72979	0.59738
Myo7a	0.566408	-0.139199	-0.388619			Hexb	Hydrolysation of GalNAc units (CS) and GlcNAc untis (hyaluronic acid) from sugar chain	0.0103759	0.296094	0.119949
Odz2	-0.412693	-0.47683	-0.157444			Hgsnat	Acetylation of desulfated GlcNS units (HS)	#N/A	#N/A	#N/A
Odz3	-0.610275	0.0891001	0.59287			Hpse	Degradation of HS chains extracellularly	0.247051	0.276004	-0.245269
Obsl1	-0.104038	0.910948	1.07244			Hyal1	Degradation of hyaluronic acid chain	2.97658	1.23056	0.284339
Atp7a	0.143679	0.113029	-0.129995			Hyal2	Degradation of hyaluronic acid chain	1.217	0.849376	0.6681
Lamc1	0.0928293	0.106642	0.076031			Hyal3	Degradation of hyaluronic acid chain	1.03421	0.131683	-0.228853
	-0.478216	0.53154	0.986393			Ids	Desulfation of 2‐O sulfated IdoA and GlcA units (HS and CS)	#N/A	#N/A	#N/A
Dst	-0.626129	0.0209078	0.149714			Idua	Hydrolysation of IdoA unit from sugar chain (HS and CS)	-0.512858	-0.0507904	0.125329
Nav3	0.259547	0.473718	0.756883			Mgea5	Degradation of hyaluronic acid chain	#N/A	#N/A	#N/A
Baz1b	0.286823	0.0297336	0.0937331			Naga	Hydrolysis N‐GalNAc moieties from glycoconjugates.	1.0752	0.66875	0.596242
Vcpip1	0.357806	0.119064	0.0220221			Naglu	Hydrolysation of GlcNAc from sugar chain (HS)	-0.0270482	0.227672	0.28103
Rc3h2	-0.0380203	-0.0143453	-0.129756			Sgsh	Desulfation of GlcNS units (HS)	0.116393	0.0676644	0.229084
Smg6	-0.184793	-0.000700257	0.00259126
Setbp1	-0.572851	-0.47038	-0.168699
Epc2	-0.202268	-0.336229	-0.423769
Rc3h1	0.273297	-0.0353437	-0.0902275
Pcdh7	0.953679	0.543239	0.806725
Nup16	0.805163	0.124515	0.168895
Vprbp	0.240826	0.0362367	-0.0206809
	-2.13805	-1.75882	-1.91176
Tpr	0.352205	0.0368138	0.00910755
Myh4	-3.03753	-2.63949	-2.37591
Adamts6	0.456275	1.58104	1.32477
Ranbp2	0.473233	-0.0297451	-0.203657
Slit3	-0.154242	-0.363803	0.000879797
9831H6Rik	0.553346	0.869675	1.12946
Tep1	-0.102733	-0.165733	-0.124222
	0.368306	0.106611	0.415563
Pds5b	-0.127542	-0.191861	-0.0460673
Zbed4	0.78748	0.309019	0.272501
Prex2	-1.11028	-0.982402	-1.19504
Ift14	-0.15641	-0.146816	-0.0172133
Hipk2	-0.0879911	-0.341087	-0.415974
Taf1	0.689366	0.411933	0.396193
Trps1	-0.16535	-0.392791	-0.232774
Rapgef2	-0.411852	-0.431786	-0.451328
Fhod3	-0.81144	0.271764	0.909918
Bcl9l	-0.165082	0.033027	0.302645
Arhgap5	-0.734861	-0.760281	-0.788123
Col22a1	-2.04992	-0.898599	-0.113194
Tcf2	-0.242713	-0.231955	-0.282448
Agl	-1.18813	-1.0187	-1.37399
Tanc1	-0.723456	-0.563086	-0.536989
Arid1a	0.215534	-0.0620707	0.0477185
Hmgxb3	0.297855	0.120494	0.107113
Anapc1	0.306383	0.191638	0.322965
Atrx	-0.322813	-0.0728206	0.148338
D4342O9Rik	-0.533521	-0.428108	-0.281703
Iqgap2	0.992546	0.956399	0.908833
Rad54l2	0.467924	0.245233	0.115825
Zfp142	-0.2096	-0.048237	0.132239
Btbd11	0.530087	0.297545	0.158135
Crebbp	0.0387717	-0.147435	-0.114195
Fasn	-0.147091	-0.645986	-0.882582
Ddx3x	0.644957	0.176282	-0.0605973
Trpm7	0.110061	-0.12377	-0.170613
Abcc1	0.213358	-0.0142507	-0.190813
Rsf1	-0.182773	-0.115518	-0.11662
Adcy9	-0.00382125	-0.0751035	0.113059
Myom2	-1.60908	0.174602	0.159827
Hectd1	0.0489506	0.0161482	-0.205641
Cpsf1	0.0243074	-0.0878196	0.02607
Plekhh1	0.57981	0.0103344	0.0743963
Zfp148	-0.18155	-0.23955	-0.178228
Flt4	0.119068	0.389431	0.275144
Helz	0.121618	0.0128104	0.0272996
Med13	0.147471	0.000552126	-0.184608
Insr	0.370433	-0.270804	-0.643464
Duox1	1.00634	0.275537	-0.103196
Arhgap32	-0.0849232	-0.257428	-0.495563
Szt2	0.262226	0.222324	0.282351
Smarca2	-0.018136	-0.0789548	0.00836422
Rock2	0.0702854	-0.0189157	-0.0868499
Kif26a	0.0828308	0.374904	0.206648
Tnks2	0.336166	0.232877	0.195661
Atm	0.0145468	-0.0334697	-0.0188985
Myst3	-0.14294	-0.267881	-0.256725
Btbd7	0.222759	0.145376	0.129719
Pcdh19	-1.05389	-0.403887	-0.306949
Kif21b	1.05828	0.588959	0.389414
Adamts2	-0.165135	1.17556	1.48607
Top2b	-0.101444	-0.00304584	-0.0378991
Magi3	0.240152	0.490132	0.673734
Ift122	-0.0748945	0.37269	0.902886
Col5a1	0.549522	3.01435	3.09892
Hspg2	0.225905	1.67652	1.86288
Dhx3	0.205077	0.130202	0.13382
Adamts9	0.686063	1.44624	1.45166
Gcc2	0.137868	-0.143005	-0.386501
Ppp1r9b	0.779653	0.594225	0.519629
Atp1b	-0.578853	-0.147917	-0.343534
Mbd5	-0.392245	-0.178035	-0.020373
Zeb2	0.25746	-0.16568	-0.0850761
Nup98	0.550298	0.155674	0.133039
Mex3c	0.814925	0.241562	-0.00923284
Kpna3	0.358417	-0.0487378	-0.149851
Notch1	0.562351	-0.0596957	-0.115892
Myo9a	-0.129055	-0.149003	-0.11112
	-1.94339	-1.77496	-1.4953
Zmym3	-0.191784	-0.00592328	0.275334
Cic	0.312621	0.232173	0.446358
Arfgef2	0.246083	-0.050835	-0.307006
Pcx	-0.478917	-0.822999	-1.0717
Cand1	0.371934	0.322887	0.289447
	-0.278983	-0.433951	-0.367032
Evpl	0.054942	-0.0836962	-0.365513
Plec	0.748249	0.633696	0.350373
Lats1	-0.00705491	-0.189319	-0.225909
Sdk1	0.840473	1.89922	2.19882
Fgd1	0.568643	0.901748	1.00529
Polr3a	0.341974	0.0114252	0.0115522
Lama2	-1.26992	-0.848739	-0.687635
Cspg4	-0.474179	-0.600604	-0.815853
Rb1cc1	-0.504041	-0.485924	-0.553204
Cdh11	0.646674	1.9802	2.11074
Myo18b	-1.19931	-0.858429	-0.860451
11137F2Rik	0.0184744	0.0205483	0.0133594
Gphn	-0.400584	-0.464473	-0.510143
Zbed6	0.0020406	0.0440757	0.0581081
Rbm27	0.281682	-0.00990872	-0.16897
	-0.0427113	-0.132014	-0.290939
Xpo1	0.739441	0.453179	0.350844
Dysf	0.200364	0.531497	0.437638
Pde4dip	-2.34956	-2.24462	-2.23582
Btaf1	0.321582	-0.0396781	-0.135905
Cdh2	1.14409	2.59251	2.79294
Taok1	0.0166042	-0.0829857	-0.166711
Bai2	-0.484724	0.262144	0.954655
Atp1a1	1.6373	0.834402	0.491352
Kdr	-0.355408	-0.205628	-0.446171
Ddb1	0.566663	0.640167	0.497282
Nav2	-0.855648	-0.449951	-0.528956
4932438A13Rik	-0.161164	-0.344781	-0.416914
Arfgef1	0.222742	-0.134154	-0.203838
Myom3	-1.66719	-0.430508	-0.404847
Rreb1	0.452534	-0.0152372	-0.0953624
Mbnl1	-0.337209	-0.487673	-0.626952
Tulp4	0.140941	0.303277	0.423365
Dsel	-0.801586	-0.461865	-0.356554
Ralgapa1	-0.388703	-0.461888	-0.556516
Flna	1.66549	1.9944	1.66865
Plcg2	0.456084	0.056912	-0.492143
Bcr	0.116742	-0.278835	-0.403164
Mprip	0.0341708	0.328753	0.226319
Nos3	-0.286536	0.0716792	-0.4833
Bmpr2	-0.118269	-0.0440317	-0.171841
Dnajc13	0.698118	0.314347	0.135982
Nup155	0.827093	0.383911	0.282167
Pappa	-0.605831	0.558471	0.679689
Ubn2	-0.45369	-0.468237	-0.46524
Abca5	-0.80123	-0.435781	-0.235827
Myh11	-0.700189	0.0423865	0.321794
Vps13a	-0.332865	-0.415436	-0.598963
Itga11	-2.18593	0.436786	1.2171
Cubn	-0.812499	-0.0856496	-0.126375
Nomo1	0.762719	0.057214	-0.174555
Fmnl2	0.748433	0.479152	0.756553
Wdr44	-0.163759	-0.118832	-0.282763
Adcy3	-0.186839	0.0487258	0.053644
Hr	0.0249681	-0.74316	-0.951048
Spnb1	-2.41987	-2.43819	-2.26145
Itga9	0.20932	0.715061	0.812815
Ipo13	-0.0213886	-0.270328	-0.379143
Pcdh17	0.34586	0.278585	0.13002
Smarca1	-0.332025	0.246935	0.478557
Vps35	0.661603	0.232893	0.0211627
Dhx38	0.803951	0.356282	0.162628
Plxnc1	2.34783	1.31832	1.00873
Gm158	0.0220862	-0.0262538	0.0723177
Ext1	0.816665	0.649367	0.528352
Zfhx4	-1.18805	0.323581	1.06139
23167B1Rik	-0.234599	-0.0355238	-0.0517448
	0.87422	2.1726	2.24208
Atp8b1	0.152092	0.263027	-0.174226
Pik3ca	0.167129	0.00938815	-0.114377
Mcf2l	-1.28894	-1.07466	-1.22768
Pcdh18	-1.05686	0.165493	0.915214
Spna2	0.235269	0.119521	0.0380287
Vars	1.13037	0.741068	0.69807
Sorcs2	-0.649345	1.34106	1.68095
Nbea	-0.268423	-0.163337	-0.151401
Scn7a	-1.78806	-1.1253	-0.949013
Kntc1	1.86283	1.19891	1.10952
Myo6	-0.534143	-0.43053	-0.518605
	0.460619	0.24352	0.0395562
Otud4	0.653094	0.342257	0.110983
Pkd1	-0.1592	0.113731	0.192083
Gli2	-1.21444	-0.487244	0.354465
Rbm12	0.356669	0.256977	0.234345
Ttc21b	-0.447212	0.0582827	0.0958426
Bmp1	0.478413	1.60742	1.68008
Agap2	0.542935	0.262271	0.726317
Atxn2	0.17673	0.15619	0.146779
Fam12a	0.482799	0.152995	0.12635
Mbd6	0.156243	-0.144774	0.304734
Ctcf	0.0521201	-0.140733	-0.216273
Atrnl1	0.080452	0.96333	1.16548
Mycbp2	0.174219	0.145288	-0.116089
Plekha6	-0.97837	-1.32629	-1.5083
Patl1	0.495248	-0.0447257	0.0592253
Cand2	-0.0652608	0.43731	0.567018
Heph	-0.429029	-0.276991	0.0529123
Caskin2	-0.943108	-1.28612	-1.01071
Stt3b	0.777564	0.339024	0.205097
Bnc2	-0.354874	0.856193	1.05278
Mybl1	-0.657579	-0.629312	-0.607822
Chd4	0.403442	0.357334	0.466324
	-0.449541	0.537165	-0.212791
Phka2	-0.724338	-0.313021	-0.196536
Mfhas1	0.635196	0.222231	0.175463
Cilp	-1.70168	-0.337593	0.0138423
Axin1	0.247826	0.11428	0.0448225
Abl2	0.740076	0.391922	0.35127
Vldlr	-1.60743	-1.21216	-1.04442
Myo1d	-0.0279669	-0.118262	-0.4391
Crim1	-0.365311	-0.871349	-0.935795
Cask	-0.0704752	0.14583	0.203748
Ints2	1.25076	0.89273	0.81088
Pacs1	0.538498	0.500095	0.796947
Ints5	0.886289	0.654262	0.583511
Cnot4	-0.122557	-0.24389	-0.277171
Megf1	-0.0116471	1.22783	1.52566
Mybpc2	-2.82858	-2.65417	-1.98623
Pcf11	-0.0197079	-0.320124	-0.503483
Ncdn	0.70677	0.404579	0.467577
L1cam	0.890922	0.265708	0.348029
Zfp521	-0.88232	0.195519	0.647806
Tm9sf3	0.709449	0.56177	0.369405
Rbm15	0.270539	-0.0458872	0.0340202
Map3k9	0.868086	0.593212	-0.0479276
Fbn1	0.473254	1.3061	0.94086
Kif1a	0.522992	1.50268	1.40416
Atp11a	-0.149216	-0.229591	-0.45414
Adam1	0.664096	0.391162	0.12486
Myo1f	2.9208	1.60863	1.20379
Filip1	-0.56068	-0.251796	-0.190777
Atp13a3	0.521236	0.30572	0.115453
Ints3	0.580012	0.325671	0.237264
Pcdh9	-0.404696	1.53862	2.14344
Tbc1d8	0.294004	-0.101971	-0.399788
Topbp1	0.465715	0.0654066	0.085099
Jarid2	0.738381	0.257305	0.0461285
Dab2ip	-0.44224	-0.0255014	-0.0874573
Gpr125	-1.09109	-0.670642	-0.550859
Ythdf1	0.0644392	-0.0651191	-0.167559
Ptk7	0.872965	1.74634	1.94131
Lrrc16a	0.127452	0.119945	0.128103
Usp4	-0.00793001	0.0618726	0.0972325
Filip1l	-0.24628	0.255584	0.190846
Ncapd2	1.25205	0.779806	0.905524
Tie1	-0.00431744	-0.0352072	-0.264827
Nbeal2	1.11528	0.393983	0.15289
Syne1	-0.991688	-0.680767	-0.567992
Kpnb1	1.20566	0.70897	0.591134
Dagla	-0.202776	-0.138284	0.0898144
Samd9l	0.578571	-0.253907	-0.251332
Secisbp2l	-0.313266	-0.825197	-1.19583
BC3223	0.136177	-0.101445	-0.167343
Fndc3b	0.00688262	0.661074	0.796469
Tll1	-0.684064	-0.391766	-0.420198
Adamts1	-0.630573	-0.198423	0.0631134
Tmem63b	0.177326	-0.000985637	-0.0896373
Sel1l3	-1.32847	-1.32661	-1.26827
Nup21	2.34871	1.63943	1.80919
Brpf1	0.209637	-0.035263	-0.0515221
Irs1	-0.406857	-0.448371	-0.226419
Ltbp1	0.589785	1.0102	0.821271
Bicd2	0.657142	0.432483	0.204318
Usp32	0.426181	-0.0772272	-0.196127
Shank2	-0.686444	1.94346	2.71133
Col7a1	0.322954	2.30301	2.66846
Usp31	-0.170372	-0.377016	-0.40055
Nkrf	0.713491	0.214094	0.27628
Fam126b	0.193492	-0.527359	-0.635543
Prrc2a	0.545739	0.458476	0.621234
Pik3cg	2.60071	1.69841	1.43908
Plcl2	0.32807	0.469468	0.293514
Tiparp	1.02306	0.112388	-0.210015
Cnnm2	-0.416986	-0.209147	-0.0757941
Dennd5a	0.221994	0.246597	0.355415
Apaf1	0.875013	0.844143	0.995027
Dhx8	0.318391	0.094262	0.0244847
Sipa1l1	0.208931	0.0947183	0.214002
Dhx37	-0.202806	-0.324134	-0.397453
Msh6	0.041059	-0.457219	-0.30858
Unc5a	2.0957	1.32898	0.953202
Thrap3	0.363315	0.0389423	0.0276298
Cse1l	0.886918	0.252649	0.0612597
Fhdc1	-0.643553	-0.648255	-0.865293
Cltc	1.4536	0.835971	0.563046
Nbas	0.304505	0.414342	0.461431
Akap6	-1.77353	-1.30264	-1.29876
Ccdc141	-0.824369	1.46479	1.48439
Tdrd7	0.0182873	0.0733371	0.0406943
Fem1b	0.310679	0.128349	0.0383586
Fam179b	-0.135431	-0.0827556	0.0439772
Dhx4	-0.140878	-0.126562	-0.243431
Rgnef	-0.682264	-0.312976	-0.294062
	0.724357	0.276169	0.17459
Ocrl	0.3793	0.0539936	-0.0958177
Ptprf	0.370857	0.308763	0.317021
	2.48363	1.40117	1.15623
Ano1	-0.0809595	0.0597992	-0.505923
Slc4a2	0.904606	0.701584	0.72073
Asap1	0.698183	0.323655	0.420279
Hephl1	-0.462551	0.821953	0.0799544
Adcy2	-1.20595	0.163456	0.514053
Lamc2	2.99654	1.91932	1.25562
Lars	0.775385	0.456879	0.254339
Atp9a	-0.265196	-0.124632	-0.384543
Stard8	0.675147	-0.200888	-0.349658
57359G19Rik	2.0244	1.25493	1.15202
Erbb3	-0.0776593	-0.439423	-0.836754
Fmnl3	0.463843	1.08066	1.208
Ncam1	-0.053434	1.24459	1.34681
Tiam2	0.147591	0.715192	1.08398
Tbcd	0.687456	0.710009	0.644333
Hic1	0.560017	1.66155	1.74605
Fat3	-1.27224	0.980807	1.33789
Zbtb2	-1.26022	-0.743433	-0.449185
Kif23	1.18513	0.500505	0.416426
Zc3h12c	1.3238	0.465438	0.310361
Ski	0.164559	0.105231	0.330198
Med14	0.797294	0.352097	0.18879
Atp2a3	-3.18813	-3.29932	-3.17269
Taf2	0.573322	0.395927	0.267305
Ythdc2	-0.0736587	-0.113045	-0.243128
	0.0990243	-0.0715498	-0.243055
Itga8	-1.27241	-1.29972	-0.48429
Zfp687	0.220433	0.200091	0.332981
Dlg4	-0.4698	0.217671	0.827716
Tnik	-0.570713	-0.402607	-0.350693
Eif3a	0.538885	0.278349	0.147217
Mov1	0.541783	0.405312	0.598556
Tti1	0.0788852	-0.0979371	-0.084284
Rrp12	0.307652	0.147186	0.122443
Zhx1	-0.486062	-0.494256	-0.510132
Osbp	0.0502896	-0.0400881	-0.0855847
Cad	1.43276	0.783813	0.783447
	0.235963	-0.0871825	-0.0940411
Smg1	0.22039	0.0402809	-0.0170444
Kat2b	-0.373038	-0.571803	-0.802664
Nup153	0.244626	-0.189724	-0.236541
Ptk2	0.323898	0.351558	0.420637
Fnip1	0.365401	0.197497	0.209515
Plagl2	-0.0336983	-0.194837	-0.384125
Adcy1	-1.12323	-0.738548	-0.251663
Drosha	-0.497233	-0.361332	-0.188023
Rev3l	-0.262979	-0.413142	-0.194156
Samd4b	0.578464	0.32312	0.337743
Atp9b	0.162321	0.124715	0.102678
Grip2	-0.722264	-0.498509	-0.761703
Copb2	0.67028	0.62401	0.373533
Fam38a	0.712233	0.624327	0.560479
Ntn1	-0.450826	-0.288997	0.323026
Kcnq5	-1.101	-1.13941	-1.23551
Cdc42bpg	0.0406354	-0.382056	-0.698972
Clip2	-0.211782	0.495147	0.842196
Slc4a4	-1.10022	0.456284	1.44846
Plcl1	-1.3904	-0.577556	-0.341513
Dbc1	2.2905	3.05168	2.91284
Atg9a	0.311795	0.214923	0.194393
Atg2a	0.426837	0.2595	0.0996228
Scn4a	-2.03943	-1.68054	-1.78454
Igsf3	1.80887	1.91309	2.16131
Rfx7	-0.159151	-0.215002	-0.180229
Matr3	-0.10755	-0.210426	-0.238982
Nup133	1.12966	0.501394	0.560385
Tsc2	-0.222756	-0.180939	-0.132773
Ireb2	0.266634	0.30298	0.256317
Siglec1	2.62524	0.728906	0.87859
Dennd4a	0.624204	0.0494242	0.113315
Jak1	0.695849	0.106695	-0.076464
Egflam	-1.16956	0.286004	0.695634
	-0.198756	-0.200605	-0.212971
Armc5	0.288002	0.379671	0.587752
Arhgef12	-0.119025	-0.174265	-0.293286
Atp2b4	-0.574713	-0.511496	-0.749249
Ascc3	0.386933	0.332201	0.20527
Rb1	-0.593117	-0.704709	-0.88228
Aqr	0.474577	0.207991	0.0957941
Tbc1d2b	0.514033	0.69821	0.698168
Zfp281	0.813325	0.731705	0.748389
Eml3	0.436276	0.162026	-0.0271419
Ankrd17	0.263168	0.0314641	-0.000758586
Smo	0.198829	0.493343	0.824805
Mir715	-1.98193	0.778707	-1.81892
Fgd5	-1.12354	-0.855735	-0.64973
Thoc2	-0.224064	-0.257753	-0.306582
Srcin1	-1.17822	-0.0993399	-0.373176
Ptch2	-1.02983	-1.16591	0.138299
	0.553924	0.301524	0.471578
Ctnnd1	0.445385	0.321022	0.19276
Smarca5	0.445079	0.0970235	-0.0225294
Dctn1	0.4888	0.538878	0.553463
Xylt2	0.107714	0.35394	0.584258
	0.279577	-0.0387719	-0.0876439
Khdrbs1	0.547668	0.472181	0.5114
Zdhhc8	-0.353337	0.072823	0.292854
Tmem132a	0.709948	0.964721	1.08584
Ints8	0.304618	0.134797	0.015917
Dennd3	1.58495	0.622848	0.627768
Enpp2	0.0349081	-0.79653	-1.12873
Adnp	0.131859	0.224622	0.385063
Lamc3	-1.80167	-1.1887	-0.921401
Dlc1	-0.602402	-0.512452	-0.469898
Abcb9	1.07046	0.209283	0.0906284
Zfp68	-0.0811042	0.0756408	0.159607
Shank3	-0.351831	-0.090243	0.0698536
Zbtb1	-0.2983	-0.150664	-0.252096
Erbb2	0.102542	-0.0595652	-0.182975
Stox2	-0.500237	-0.313812	-0.236097
Cul3	-0.196102	-0.176034	-0.517277
Tnks	0.0131571	0.0325939	0.140317
Ralgapa2	0.107106	0.390074	-0.188761
Copb1	0.638637	0.554342	0.474332
Zfp423	-0.632022	0.614712	0.788654
Ppfia3	0.256821	0.148392	-0.118528
Polr1b	0.914576	0.207296	0.122504
Map3k11	0.786959	0.178975	0.0176284
Bbx	-0.165375	-0.114313	0.0136465
Fam19b	-0.496372	-0.259566	-0.364147
Slc6a17	1.95578	3.04784	4.07939
Zfx	0.28482	0.237318	0.123488
Lama5	0.0612924	0.0934959	-0.067919
Furin	1.34506	1.00589	0.680858
Tnc	4.00923	5.99326	5.58407
Pnpla6	0.363644	0.149263	0.124997
Lamb3	1.44141	0.342653	-0.0302598
Prpf8	0.463457	0.00952102	-0.000685503
Trp53bp2	-0.270034	-0.36514	-0.590059
Disp1	-0.696354	-0.326137	0.0138192
Plcb2	1.79875	1.32327	0.998404
Rbm15b	0.496756	0.49606	0.435825
Cdkl5	-0.470291	-0.433405	-0.379486
Fzd3	-0.562455	-0.422528	-0.349597
Scube3	-0.776495	0.355855	1.12163
Taok3	0.976597	0.397539	0.215338
Tex1	0.523481	0.32461	0.274835
Tnrc6b	-0.319402	-0.2584	-0.227476
Lamb2	-0.281272	-0.0858324	0.0429219
C3	1.97177	1.65677	0.665811
	0.40514	1.44105	1.60159
Kdm6b	1.54621	0.268752	0.438046
Rbl1	1.20068	0.729783	0.569414
23121P13Rik	0.422257	0.354044	0.554727
Zcchc11	-0.181419	-0.265104	-0.10122
Tmem132c	-1.14749	-0.668356	1.16981
Lgr6	-0.911084	-1.34837	-1.29777
Ncapg2	1.45472	1.03101	0.974271
Npr2	0.0209086	0.405671	0.347883
D6337F22Rik	-0.574054	-0.371757	-0.256298
Sh3bp4	0.0448243	0.165112	0.354438
Mid2	-0.115939	0.288518	0.121294
Kpna4	0.415891	0.057929	-0.110941
Igsf9b	2.30009	1.62998	1.53458
Extl3	0.305508	0.15209	0.170329
	0.438974	0.0409401	-0.142924
Wdr6	0.0662353	0.846966	1.16849
Ebf3	-1.51265	-0.710707	-0.987154
Gm15455	0.317738	0.158562	0.149906
Lrba	0.0416464	-0.0289829	-0.214493
Inpp5d	2.05378	1.00462	0.763071
Agap1	-0.0793603	-0.0273385	-0.24075
Kpna6	0.341314	0.0974366	0.0246944
Cpsf6	0.705526	0.114065	0.00456399
Mical3	0.208456	0.0958688	0.0830679
Pde2a	0.120318	-0.108203	-0.586487
Mapkbp1	0.326241	-0.184467	-0.330381
Slc24a3	0.153316	0.000182445	-0.247075
Esyt1	0.734951	0.539384	0.346465
Epha1	0.333903	0.111615	-0.346947
Dennd1a	0.125638	0.0972455	0.255916
Plxnb3	-1.47063	-1.89805	-1.44376
Tshz1	-0.632501	-0.215197	0.177281
Odf2	0.727526	0.535597	0.598516
Map3k4	0.130504	-0.193361	-0.346372
Col4a2	0.886461	1.42623	1.36931
Dhx16	0.83537	0.22358	0.207275
Lrfn4	1.0176	1.18506	1.07071
Ankrd11	0.22011	0.0664458	0.0426807
Pds5a	0.564159	0.289821	0.131009
Map3k5	0.459487	-0.289926	-0.405566
Mrc2	0.559922	1.54471	1.84506
Magi2	-1.55816	-1.73735	-0.8697
	-0.0182426	-0.0411741	-0.17354
11128C15Rik	-0.796812	-0.639811	-0.633827
Ptch1	-0.736449	-0.649245	0.178506
Notch3	0.959321	0.56671	0.452847
Slmap	0.395448	0.141392	-0.0674607
Smpd3	0.0815196	0.541711	-0.199047
Ulk2	0.0757896	0.0799542	-0.0391379
Add1	0.228857	0.121157	0.0550417
Iqgap1	0.60488	0.166942	-0.0857902
Pcdh2	-1.48302	-1.46941	-1.14107
Nrap	-2.41829	-2.93535	-2.42476
Csde1	0.0594656	-0.13245	-0.251431
Ror2	-0.00601333	1.42884	1.7189
Cps1	-1.21126	-1.20285	-1.81382
mKIAA1997	-0.673713	-0.275484	-0.113464
11118G7Rik	0.695692	0.555314	0.529896
Trappc9	0.341861	0.189533	0.186672
Tomm7a	0.338526	-0.00767313	-0.153567
Phf14	0.115574	0.325687	0.384422
Itga3	1.55435	0.148757	0.0250473
Pdpr	-0.0624591	-0.245994	-0.265111
Tlr7	0.615373	0.876299	0.512527
Skiv2l2	0.448092	0.19737	0.0936923
Ccdc18	0.232593	0.292042	0.226581
Nr3c2	-1.74628	-1.67901	-1.638
Xpo4	0.726972	0.44399	0.32455
Trim8	0.979156	0.555412	0.428374
Sox6	-1.25817	-1.4697	-1.36975
Tyk2	0.387862	0.35135	0.410837
Lrrn1	-1.43577	2.54981	3.14954
BC6779	0.562564	-0.052506	0.0595726
Ap1g1	0.429826	0.121496	-0.0305919
Dis3l	0.228333	0.156934	0.186225
Dse	1.59079	1.24477	0.962141
Eif3c	0.661932	0.20268	0.0903262
Ahctf1	0.193615	-0.41743	-0.430015
Mcc	-0.422421	-0.252648	-0.00259537
Cpd	0.0421214	-0.389075	-0.608121
Thbs4	-0.00136825	0.746163	0.592828
Ndst1	0.529296	0.82637	0.884005
Ppargc1a	-2.28778	-2.35619	-3.019
Dnahc1	-0.0447908	-0.493293	-1.10615
Nckap5l	-0.10933	0.300643	0.672534
Ubap2l	0.209611	0.173323	0.228073
Mcm2	1.06151	0.446329	0.480361
Arhgap39	-0.061268	-0.190619	0.02881
Txndc11	0.51186	0.527568	0.525494
Rnf13	-0.00469476	0.220146	0.00154978
Kdm1a	0.187858	0.194204	0.121561
Ncoa2	-0.0763703	-0.184985	-0.19856
Plxna3	1.42931	1.10821	1.02498
Prkg1	-1.14107	-0.404297	-0.101651
Myom1	-3.27152	-2.17054	-2.10353
Exoc5	0.233419	0.182753	0.0441662
Nfatc4	-0.521691	0.606001	1.16206
Zhx3	-0.417937	-0.522897	-0.47723
Plxna4	1.09167	0.994391	0.927709
Dll1	0.455992	0.711602	0.726688
Sema3c	-0.136263	-0.574849	-0.65515
Sash1	-0.425652	-0.157658	-0.119149
	0.28707	0.241949	0.15287
Smarca4	0.818259	0.603003	0.660203
4921513D23Rik	-0.0835286	-0.140302	-0.218756
Rin2	0.38871	0.336154	0.270723
Slc5a3	-0.301532	-0.336945	-0.482553
Chd9	-0.0550278	-0.0816101	-0.171827
BC223	0.082961	0.0749455	0.157831
Prkd2	-0.217107	-0.297728	-0.0123786
Stt3a	0.674803	0.472993	0.243424
Itga2	0.724044	-0.170605	-0.594074
Nphp3	-0.388027	-0.109154	0.0742832
Cdhr1	8.2052	6.77881	6.14764
Nlrx1	1.23889	0.613669	0.674674
Nfatc1	-0.410576	-0.327868	-0.224016
Gemin4	0.952215	0.712493	0.660987
Cdk12	0.264225	-0.0143508	-0.0530906
Inpp5a	-0.363634	-0.366411	-0.427007
Galnt3	0.428449	-0.29332	-0.508114
Epas1	-0.0491925	-0.175528	-0.687767
Zfp516	0.241377	0.358497	0.442895
Atp11b	0.955367	0.245115	0.0304023
Clcn5	0.61578	0.817177	0.751827
Gpr64	-0.376791	1.14885	1.72958
Mllt6	-0.347422	-0.257405	-0.103003
Ncoa1	-0.176166	-0.132473	0.0804974
	-0.30004	1.32903	1.30649
Wdr17	-0.504704	-0.66113	-0.802973
Pomt2	-0.202091	0.0475133	0.248709
Slitrk6	-0.147602	-0.295367	-0.509453
Xpr1	0.671056	0.470322	0.404874
131F3Rik	-0.160391	-0.640864	-0.689807
Znrf3	-0.205481	-0.200226	-0.106593
Slc4a3	-1.47189	-0.886004	-0.398995
Ptprv	0.189721	0.604414	0.865229
Prdm1	0.169388	0.360662	-0.344602
Ikzf2	-0.406978	-0.377404	-0.309332
Prdm4	0.67303	0.449799	0.240879
Atxn1	0.442898	0.418627	0.305234
Cdh6	0.687371	1.11146	1.06064
Flrt3	0.281828	-0.213375	-0.218371
Odz4	0.567874	0.348314	0.375915
Mfn2	-0.681987	-0.995165	-1.04204
Zfhx3	-0.737536	-0.10163	0.533946
Ccdc8	-0.783139	0.371138	0.361184
Sec23a	-0.0839413	0.377073	0.305921
Taf5	0.53779	0.024939	-0.167267
Camsap1l1	0.0266601	-0.16241	-0.176609
Prpf4b	-0.891927	-0.735203	-0.281552
Ptpru	-1.07636	-0.700589	-0.864529
Wfs1	-0.972938	-0.6871	-0.774792
Usp13	-1.06776	-0.880728	-0.76296
Lrp6	-0.194262	-0.264398	-0.327959
Stim2	0.0921151	-0.162295	-0.269632
Sipa1	1.41816	1.01693	1.15556
Tada2b	0.246819	-0.101136	-0.00444631
Mcm6	1.12161	0.665211	0.567359
Foxp4	0.4058	0.308746	0.337811
	0.079415	0.168559	0.296748
Ect2	1.59607	0.761036	0.829058
Sbno1	0.347017	0.080822	0.00607018
Itpr3	0.0267583	-0.29529	-0.385918
Slc9a1	0.488541	0.256086	0.17495
Rps6ka3	0.493472	0.265329	0.149245
Fbxl5	0.997897	0.585503	0.427457
Abcf2	0.693151	0.330182	0.241438
Tab2	0.104079	-0.0689915	0.092092
Nr2c2	-0.222062	-0.160273	-0.236325
Angel1	-0.0673795	0.41415	0.523689
Numa1	-0.00164367	0.0305628	0.156186
Dennd4b	0.544566	0.146578	0.122922
Kifap3	-0.143363	0.0661631	0.0499724
Arhgap21	0.113363	-0.286911	-0.350415
Sema4d	0.515149	0.487808	0.177707
Adam19	1.73875	1.68152	1.40367
Kdm5c	0.476689	0.359562	0.282676
Bcar1	0.504417	0.540872	0.476658
Nlgn2	-0.154404	1.05548	1.64488
Frmpd1	0.0300229	0.451092	-0.110652
Atp2c2	1.21707	0.499697	-0.0687695
Rnf139	-0.103166	-0.283183	-0.511474
C3327C9Rik	1.2141	0.955236	0.786742
Nacc1	1.21092	0.618503	0.353187
Pak6	1.10181	0.34094	0.0850738
Med12	-0.0564949	-0.304597	-0.182708
Ttbk2	-0.263402	0.0718651	0.219687
Ptgfrn	1.11485	1.42459	1.63884
Rab14	0.361975	0.142568	0.0769782
Lrrc16b	-0.585945	-0.379252	-0.432948
	0.357316	0.190195	0.116742
Smg7	0.143108	-0.227014	-0.24761
Flii	0.658628	0.344182	0.149071
Tenc1	-1.16842	-1.01907	-0.809069
Col4a1	1.04327	1.30463	1.24581
Gtf3c4	0.436898	0.285052	0.322248
Taok2	0.404061	0.294479	0.509897
Tgfbrap1	0.600892	0.234145	0.169154
131I1Rik	0.640327	0.131437	-0.0113179
Kcnb1	-1.1662	-0.547754	0.527291
Plxnd1	0.153535	0.320468	0.306861
Abcb6	0.573315	0.135113	0.110537
Sh3tc1	1.3182	1.14493	0.750462
Ano6	0.152624	-0.154155	-0.253752
Trappc8	0.39689	-0.0238931	-0.284133
Rimbp2	-1.45902	-1.04771	-0.85213
Fxr2	0.0739285	-0.140051	-0.165949
	-0.652417	-0.32488	-0.0884728
Camsap1	0.183227	0.447814	0.492529
Rprd2	0.0438768	-0.0176626	-0.039692
Nfrkb	0.209032	-0.0526937	-0.00966434
Abl1	0.626951	0.194386	0.275414
Pkp4	0.549252	-0.261176	-0.300772
Zfyve1	0.364216	0.388133	0.358177
Zer1	-0.444937	-0.291198	-0.050211
Zfyve2	0.26378	0.234258	0.0214577
Ambra1	0.295706	0.0650736	0.044738
Slco5a1	-1.17205	0.626019	0.521081
Hnrnpk	0.342121	0.138053	0.0848391
E2f3	1.21682	0.875389	0.905684
Grk5	-0.925199	-0.709966	-0.561233
Dhx15	0.178798	-0.0212178	-0.168328
Bcor	-0.02603	-0.106191	-0.181697
Phf17	-0.338697	-0.418047	-0.464621
Xpo6	0.84654	0.493724	0.461871
Spata5	0.0017995	-0.0626275	-0.18089
C2381A13Rik	0.210671	0.38097	0.258638
Chuk	0.370994	0.0503988	-0.0783633
Atxn7l2	-0.188934	-0.201962	-0.0196993
Thbs3	-1.10904	0.650105	0.800509
Herc3	0.3883	-0.246083	-0.475474
Mthfd1	0.413944	0.0336221	-0.152722
Abtb2	-0.274392	-0.887641	-0.79663
Sin3a	0.055609	-0.0778032	0.142052
Pdzd2	-0.63074	-0.541564	-0.673922
Sncaip	-1.97449	-0.791184	0.525866
Arnt2	-0.305281	-0.0713197	0.673441
Agbl1	-1.84447	-2.63116	-2.50725
Lrrc4	1.33413	1.88623	1.91657
AI8481	0.334721	-0.0493694	-0.113003
Edc4	0.180948	0.108616	0.0860413
Polr2a	0.654111	0.289183	0.336141
Pcif1	0.219161	-0.0135544	-0.0427806
Lrrtm1	0.940596	3.37534	3.53965
Pgap1	-0.469741	-0.52489	-0.707863
	0.0605392	0.385603	0.967007
Clcn3	0.0894395	-0.33231	-0.546921
Lyst	0.426807	-0.00847284	-0.162366
Zfpm1	0.498515	0.55878	0.309356
Slc9a6	0.635478	-0.0058804	-0.0488577
Pcnx	0.495768	-0.00374882	0.123611
Aldh1l1	-2.73131	-3.06978	-2.86593
Sipa1l2	0.835864	0.341952	0.176275
1192N15Rik	-0.337611	-0.503916	-0.349619
Nid1	-0.228468	0.310658	0.283872
Nedd9	0.457093	-0.102958	0.140044
Tmtc2	-0.518174	-0.338464	0.387293
Lpin1	0.156874	0.0130528	-0.160257
Fem1c	0.407815	0.294437	0.155307
Bzrap1	-0.862309	-0.129572	0.727608
Hspa5	1.49482	1.18522	0.88017
Rtf1	0.0257362	-0.184919	0.131253
Kdm1b	0.148242	-0.169171	-0.315833
Zfp385a	0.599573	0.257582	0.25525
Fam98a	0.245894	0.290057	0.313946
Spg11	0.0165086	-0.0609902	-0.0112171
Ampd2	0.499296	0.288932	0.374567
Ninl	-0.913764	-1.02648	-0.79885
Ggt7	0.432412	0.684529	0.925195
Slc12a9	-0.21399	0.12859	0.0860425
Pum1	0.132903	0.094169	0.0904649
Cacna1c	-0.513913	0.939266	1.18442
Zfp219	0.0328925	-0.326171	-0.175706
Hectd3	0.538707	0.355182	0.274712
Exoc6b	0.420606	0.323451	0.362877
Tox	-0.450451	-0.0662961	0.020344
Col5a3	0.916487	2.45779	2.21762
Uba1	1.03197	0.618052	0.447876
Smurf2	0.376028	0.13435	0.00952248
Vps41	0.229451	0.213227	0.117945
Xab2	0.170867	-0.00496127	-0.0169681
Zfp654	-0.214496	-0.435524	-0.398672
Kank1	-0.450813	-0.866049	-1.00112
Rrm1	1.00412	0.245141	0.159342
Tnpo2	0.405431	0.325151	0.285559
Adam11	-0.964417	-0.83109	-0.735627
Fam171a2	0.915469	2.23349	2.45811
Heatr5a	0.561073	0.748661	0.576247
Agtpbp1	-0.079629	-0.133379	-0.158726
99321J3Rik	-0.358375	-0.496207	-0.302586
Grik5	-1.15949	-0.43089	0.368988
Tjp2	0.853291	-0.030506	-0.225473
Bnc1	2.74243	1.2545	1.08521
Ace2	2.06266	2.14741	1.81433
Zmynd8	0.406918	0.494815	0.329609
Tab3	-0.0121553	-0.483221	-0.620862
Acsl4	0.0235395	-0.721669	-0.90418
Ephb4	0.222708	0.436033	0.651978
Gria3	-2.53838	-1.49636	0.426645
Fam59a	0.122478	0.344753	0.423467
Galnt1	1.2156	0.755156	0.419292
Dyrk1b	-0.773045	-0.597814	-0.321749
Tyro3	-0.0849748	0.118948	-0.121217
Slc33a1	0.261599	0.0636629	-0.266647
Pygl	0.47349	-0.148353	-0.26393
Pygm	-3.03662	-2.91577	-2.99533
Tril	0.403625	1.30654	1.45413
Rps6ka2	-0.144809	0.10127	0.0226812
Clstn1	-0.0492661	0.0700991	0.184177
Btbd1	0.214452	-0.0164843	-0.0788893
Sec23ip	0.409452	0.459658	0.477632
Postn	-0.75083	0.447365	0.508637
Rlf	0.431635	-0.170409	-0.171363
Sp2	-0.130146	-0.430818	-0.340953
643527G18Rik	0.238117	0.210956	0.139222
Tbc1d23	-0.123953	0.0416334	0.00825253
Fam171a1	-0.361237	0.0705117	0.366107
643598A4Rik	-1.2116	-0.791088	-0.696813
Trip12	0.222162	0.238437	-0.0433372
Bend3	1.56111	1.36444	1.33433
Flrt2	0.16002	1.4877	1.68931
Smurf1	0.404129	0.22669	0.143132
Trpc4ap	0.562041	0.482145	0.517991
Rspry1	0.162621	0.296152	0.256349
Tbl1xr1	0.44579	0.0654397	0.0228186
Erbb2ip	-0.135133	-0.0801443	-0.0974103
Ube4a	0.22048	0.0216077	-0.104368
Foxo3	-0.123274	-0.12984	-0.253948
	-0.381707	-0.661297	-0.857587
Pum2	-0.0122795	-0.0845646	-0.0615977
Frmd4b	-0.532901	-0.765681	-1.08479
Trim28	1.2593	0.952161	0.883029
Rap2c	0.710272	0.749479	0.54857
	0.24025	-0.00152904	0.0466355
Casd1	-0.057679	-0.0513858	-0.122717
Erc1	-0.0599186	0.0304952	0.0824527
Mthfd1l	2.2661	1.8225	1.90297
Mast2	0.0353179	0.177255	0.212916
Acan	-0.981071	-0.745749	-0.763079
Osbpl7	-0.115721	0.0696097	0.484369
Slitrk2	-0.997836	-0.438133	-0.619827
Arhgef26	-0.745525	-1.13403	-1.01301
Efnb1	0.785685	0.800762	0.802496
Acsl3	0.24642	0.312351	0.168126
Phex	-0.316864	-0.833495	-0.384419
Bahd1	0.404308	0.526959	0.584874
Katnb1	0.641073	0.465168	0.457199
Med16	0.737475	0.375104	0.342474
Pdzrn3	-0.118095	0.569965	0.763567
F13a1	-0.544017	-0.72638	-0.900687
Map3k12	-0.0963715	0.423942	0.53969
Snrk	-0.0280132	0.00436225	-0.0412737
Exoc3	0.115299	0.0289336	0.0153583
Ar	-0.901439	-1.04445	-1.14676
Wdr24	0.410461	0.152254	0.0729834
Zfp47	0.353969	0.172865	0.15766
Hadha	0.273065	-0.174139	-0.488254
Parp1	0.360564	0.43465	0.561555
Cyp26b1	-0.352322	-0.430248	-0.554335
Rasal2	0.267626	0.116887	0.235305
Tubgcp3	0.543542	0.32507	0.288048
Brd7	0.257979	0.0393178	-0.0191281
Ophn1	-0.441648	-0.357391	-0.269745
Gpr133	0.828074	2.30095	1.84715
Spata13	1.6945	0.225401	0.330583
Pde5a	0.222167	0.155465	0.0842651
Tjp1	-0.117307	-0.224565	-0.288293
Man1a	0.537742	0.854803	0.510074
Wdr26	0.403246	0.265137	-0.0137659
Itga1	0.110619	0.46585	0.613038
Adamts5	-0.809048	0.31431	-0.344343
Dido1	0.341972	0.121114	0.156822
Tfip11	0.755031	0.38797	0.255381
	1.55528	1.25724	0.914433
Aco2	-0.652493	-0.885337	-0.991889
Afg3l2	0.500491	0.166901	0.168974
Pbx1	0.659376	0.553903	0.616668
Dennd5b	-0.561934	0.251446	0.526283
Msl1	0.285116	0.167825	0.20836
	-1.59751	-1.52303	-1.3847
Lrrc8d	0.788756	0.452338	0.393554
Adamts4	1.135	2.21956	1.9728
Arhgap6	0.0473425	0.0953911	0.00168848
	-1.21223	-0.167186	-0.409036
Ltbp4	-1.62429	-1.55686	-1.47521
	-0.101445	0.452796	0.512076
Map3k6	0.61331	0.348223	0.136478
Sec23b	1.2658	0.528196	0.284898
Ncoa3	0.455162	0.0147124	-0.16372
Lrp8	1.02971	0.882115	0.778157
Tiam1	0.485711	-0.0791875	-0.397342
	0.0674645	0.659319	0.543936
Tek	-0.491481	0.568467	0.358627
Sv2b	0.100139	0.558777	0.902282
C2cd2l	1.02557	0.373881	0.499092
Mgat2	1.25687	1.01007	0.901477
Fam83h	0.71133	0.149352	-0.0582893
Etf1	0.811757	0.211407	-0.0854309
91311E15Rik	0.431936	0.273108	0.337347
Kcna6	-0.572559	-0.400399	-0.468847
Map3k14	0.539102	0.635728	0.691293
Pabpc1	0.754841	0.158937	0.244221
Cnnm4	0.334194	0.451381	0.100096
Kif11	1.89811	1.22798	1.13996
Zzef1	0.409506	0.249372	0.196535
Synrg	0.110974	-0.0825972	-0.184373
Aco1	0.154943	-0.216013	-0.34015
Atl1	-0.6804	-0.0481853	-0.0416329
Ppp2r2d	0.376089	-0.058054	-0.147081
St14	0.250256	-0.299032	-0.618857
Ep3	0.456377	0.114922	0.0414505
Hnrnpul2	0.614327	0.415253	0.445787
	-0.930453	-0.915087	-1.01355
4269	0.0389755	-0.203289	-0.305217
Abcd2	-2.46457	-2.82283	-3.07753
Rap1gap	-0.0545294	-0.15795	-0.11929
Fut8	-0.388864	0.148771	0.167019
Nek9	0.34291	0.384043	0.385725
Loxl2	-0.00807667	1.25926	1.40637
Lgr4	-0.812589	-0.909707	-0.902986
Ercc6l	0.665699	0.0162321	0.0587015
Myo1b	0.277113	0.484982	0.379502
Psme4	0.294722	0.218823	0.0232872
Hspd1	0.986934	0.0906294	-0.0556519
Itgb8	-0.54161	-0.844717	-0.812908
Jhdm1d	0.578106	-0.0686318	-0.383021
Ncor1	-0.00384838	-0.171631	-0.221571
Cog7	0.195915	0.149336	0.142209
Eef2	0.634362	0.48205	0.536076
Ddx42	0.0732753	-0.0499057	-0.0817571
Gpc1	-0.0579319	0.19575	-0.00995079
Epha3	0.127391	0.121357	0.566204
Ccdc21	0.246225	0.132174	0.247389
Hmgcr	0.851294	0.601013	0.279437
Frmd4a	0.095149	0.279977	0.373744
Atp13a5	-0.3527	0.182303	-0.0193686
Hdlbp	0.622417	0.738993	0.728193
Npc1	0.689462	0.470898	0.344004
Rnpepl1	0.12163	-0.278727	-0.3141
Tnfaip3	2.33964	0.231553	-0.0592952
Jup	0.944932	0.468436	0.193391
Rps6ka4	1.6742	1.24446	0.921017
Fam184a	-0.527743	-0.631092	-0.585691
Sgsm3	1.01685	0.645618	0.534799
Dock1	-0.06031	0.3301	0.340265
Vps54	0.0485587	-0.140636	-0.358118
Heatr1	0.768319	0.281968	0.122834
Ggnbp2	0.169885	0.0891633	-0.0250538
Psmd2	1.31745	0.906164	0.744704
Brpf3	0.319993	0.205888	0.370421
Epc1	-0.321305	-0.345137	-0.347851
Flrt1	-0.522603	-0.921291	-0.733577
Zswim4	0.670638	0.532306	0.388881
Pik3cb	0.0994806	-0.0568921	-0.518838
Tnrc6c	-0.251174	-0.171122	0.0340502
Gatad2a	0.738643	0.413105	0.269225
Rhbdf2	0.916961	0.0438152	-0.388858
Pdgfrb	0.223819	0.886299	1.01093
Tacc2	-0.856576	-0.913533	-1.16276
Atg7	0.315379	-0.0275546	-0.137697
Thoc1	-0.197622	-0.33713	-0.386942
Zfp646	0.256339	0.108933	0.167669
Myrip	-1.37958	-1.15431	-1.71131
Mtss1l	-0.678832	-0.20014	0.114417
Rgl1	-0.022655	0.232599	0.35461
Fig4	0.229905	0.386479	0.140024
Kif3a	0.0428754	0.0991104	0.052211
Ltbp3	-0.63433	0.134415	0.648442
Hnrnpf	0.973306	0.452417	0.227439
Urgcp	0.0340493	0.0979229	0.122969
Nod1	0.0580129	-0.00616216	-0.347536
Snx19	0.343531	0.30967	0.209216
Fbln5	0.204609	0.714212	0.890853
Cacna2d3	-1.66633	3.11176	3.8069
Tle4	0.131611	0.236167	0.120777
Mertk	0.342331	-0.610162	-0.487702
Wbp7	0.792161	0.509831	0.664989
Wdfy4	2.52198	1.91465	1.5199
Tnpo1	0.784589	0.473654	0.323732
Fam38b	-1.07139	-0.0416579	-0.0684119
Myo1c	0.555434	0.452566	0.341976
Zbtb1	-0.0452973	-0.0970447	-0.137648
Dlgap4	-0.022537	0.0260466	0.198706
Mmp14	0.79664	1.8676	2.06128
Prkrir	-0.124468	-0.429348	-0.449869
Acvr1	0.213603	0.731982	0.602061
Ppp3ca	-0.243617	-0.201642	-0.312449
Pcsk7	0.194913	0.22943	0.0743207
	0.0764497	0.205758	0.149488
Gtf3c1	0.358371	0.290506	0.226216
Ptprm	-0.783058	0.0770689	0.189333
Sema3g	0.402059	-0.413395	-0.227252
Fam16b2	0.422855	0.22	0.0361928
Pdcd6ip	0.371465	0.161628	-0.0236031
Itgb5	0.223682	1.02631	1.21344
Lig3	-0.00838197	-0.0586901	-0.0295564
Dpysl2	-0.264473	-0.0636195	-0.0352828
Cnot1	0.0766042	0.00604953	0.0796786
Gmps	0.450745	0.143931	-0.0380202
Ston2	0.678528	0.146706	-0.206235
Usp49	-0.547367	-0.308279	-0.216245
Chsy1	1.13056	1.62172	1.67097
Ulk4	-0.75452	-0.629313	-0.39602
Pfkl	1.08937	0.364397	0.365533
Lgr5	0.0925855	-0.471672	0.410957
Spen	0.203287	-0.19775	-0.169868
Tlr13	3.14913	1.83677	1.23754
Mogs	0.720157	0.44452	0.51417
Slco3a1	-0.685629	-0.391533	-0.486628
Pgm2l1	-0.283761	0.113409	0.190901
Arhgap42	-0.403598	0.143513	0.172288
Mvp	1.07482	0.793485	0.532593
	-0.594912	0.020355	-0.23893
Dip2c	-0.013357	0.181241	0.22229
24189E3Rik	-0.234491	0.191944	0.351342
Klf4	-0.095148	-0.286152	-0.719648
Pik3c2a	0.0724511	0.167791	-0.166338
Scap	0.178683	-0.0692704	-0.0105531
Sart1	0.696906	0.34758	0.283406
Tbc1d2	1.75118	0.582114	0.0491899
Ctr9	0.0358656	-0.0351802	-0.103415
Prpf4a	0.391079	0.0341894	-0.0776102
Sort1	-0.335704	-0.260811	-0.219124
Usp21	0.167495	0.208772	0.438878
Gpatch8	-0.0725332	-0.0448378	-0.00747281
Cpt1a	1.27353	0.0906403	-0.0425704
Stat5b	0.801105	0.541937	0.348087
Ap3m1	0.146744	-0.103189	-0.186858
Hnrnpul1	0.374425	0.142847	0.159738
Fzd7	0.0424529	0.640388	0.83436
Zfand5	0.273169	0.133514	0.0990965
Itgb1	1.1824	1.57829	1.36632
Usp54	0.0313894	-0.312261	-0.467901
Kif2a	2.40113	1.54934	1.45048
Sh2d3c	0.0747922	0.198561	0.123192
Zfp367	-0.884281	-1.17029	-1.11562
Fbxl19	0.660643	0.491847	0.451073
Wdr37	0.383382	0.30402	0.345595
St5	0.139529	0.510396	0.622573
Stat3	1.24459	0.83	0.594255
Srgap3	-0.868989	-0.43215	-0.223999
Tnrc6a	-0.13665	-0.100467	0.197058
Zranb3	0.166848	-0.192166	-0.0559908
Aldh18a1	1.28655	1.77389	1.73326
Zbtb37	-0.575472	-0.500905	-0.256664
Ace	-1.66651	-1.576	-1.63795
Sec24d	0.757792	1.16255	1.23397
Iqsec1	0.74481	0.0485551	-0.163064
Ripk4	0.786491	-0.090161	-0.36388
Fam193a	0.136151	-0.0216898	0.0812958
	-0.775944	-0.808549	-1.2562
Mcm8	0.810497	0.333464	0.141683
Btk	1.70389	0.966184	0.673461
Appl1	-0.0353747	-0.0757431	-0.21918
	-0.0885983	-0.217179	-0.20025
Glce	0.165121	0.0972334	0.152494
Tcfap2b	-0.9435	-1.48121	-1.57041
Ccdc88b	2.29713	1.83961	1.79177
Edem1	1.07669	0.79081	0.379846
Col24a1	-1.13821	-0.961753	-0.592788
Jag2	0.249895	-0.300169	-0.467729
Samd4	-1.03885	-0.473795	-0.378069
Scn8a	-0.755109	-0.0292731	0.836078
Prkce	0.212295	-0.332762	-0.283158
Cog5	0.204641	0.209113	0.324887
Hnrnpu	0.627771	0.291656	0.197078
Ftsj3	1.24245	1.68004	1.75857
Cpeb4	0.325698	-0.0240467	-0.249185
Daam1	-0.067267	-0.164024	-0.348203
Esyt2	0.129636	0.26243	0.217715
Cdc5l	0.121423	-0.0716105	-0.0502027
Kif5a	-1.53493	-1.05661	-0.632595
Zfp318	-0.784417	-0.450832	-0.355648
Smcr8	0.450015	0.126206	-0.00718111
Slc2a1	2.49935	1.23809	1.04883
Man1c1	0.890051	0.60382	0.449811
Kit	0.108454	0.54533	0.377705
Rasal1	0.0765374	0.826269	0.462825
Ddx54	0.896541	0.500593	0.338517
Zdhhc14	0.406987	-0.255122	-0.418216
Sulf1	0.321921	0.706421	0.405431
C1339O16Rik	0.210477	0.284129	0.1918
Mme	-0.91553	-0.847169	-0.586905
Afap1	0.13727	0.57906	0.608129
Clcn4-2	-0.698352	-0.926936	-1.02056
Sema3f	0.473254	0.322477	0.32438
Ogdh	0.102003	-0.0697494	-0.298759
Capn7	0.158468	-0.0656597	-0.113884
Vcp	1.18946	0.787717	0.688389
Ptpn3	-0.273975	-0.396513	-0.735937
Atxn1l	0.339365	0.15941	0.233345
Bcl6	-0.0665824	-0.660872	-1.08874
Hsp9ab1	0.889177	0.405807	0.306579
Stxbp1	-0.0243787	0.55578	0.667253
Qser1	0.0686889	-0.0705935	0.0349668
Sema3b	-1.20411	-0.295786	0.185134
Ppp2ca	0.352879	0.121775	-0.0683008
Map3k3	0.307306	-0.0818679	0.00229027
Slc8a3	-1.84705	-1.74642	-2.00776
49342H24Rik	-0.403862	-0.0337056	0.181966
Rasip1	0.432359	0.0828729	0.154936
Bmper	-0.827466	-0.00249695	0.248418
Aff4	0.215996	0.134028	0.153675
Trim37	0.53556	-0.0654952	-0.094861
Lrp12	0.310279	0.292866	0.253288
Fam49b	1.46269	0.599707	0.421651
Cep12	-0.204338	-0.235716	-0.139495
Nampt	0.00483287	-0.731794	-0.866349
Pappa2	1.15011	-0.542286	-0.229353
Hip1r	0.220817	-0.147047	-0.541834
Abca12	0.196399	-0.122583	-0.655163
Epha4	-0.570246	-0.64522	-0.725675
Abcc1	-0.282999	-0.0847423	0.0270944
Ggcx	0.263924	0.403194	0.391117
Wwc2	-0.0620825	0.549455	0.607546
Usp9x	0.175889	0.0760035	-0.0693243
Ppp3cb	-0.109282	-0.0429657	-0.0637404
Kcmf1	0.361063	0.0275114	-0.199126
Bbs9	0.119924	0.480487	0.713957
Acsl6	-3.27699	-2.88334	-3.71829
Gopc	0.368835	0.205445	0.0571865
Tubgcp5	-0.373114	-0.271817	-0.311383
Lingo1	-0.992643	0.670663	0.981976
Phf15	-0.26619	-0.509131	-0.577238
Dhtkd1	-1.12683	-1.19268	-0.69464
Pla2g4a	0.0745262	-0.606335	-0.776814
Sp4	-0.535032	-0.532678	-0.332277
Hecw2	-0.148473	0.624195	1.04628
Rab1	0.657133	0.20447	-0.0890342
Ddx23	0.4271	0.0508589	0.0694463
Plekhm3	0.125695	0.13755	-0.11997
Cachd1	-0.851267	-0.858677	-0.66374
Smad6	0.184441	-0.102662	0.414728
Ftsjd2	0.158962	-0.0140414	-0.1216
Crnkl1	0.0362339	-0.0552045	-0.193439
Igsf1	-0.79291	0.134926	0.908895
Slc44a1	0.485136	0.408362	0.37703
Gys1	-0.121408	-0.551816	-0.531502
Celf1	0.343338	-0.0289844	0.0160408
Blm	0.604289	0.101539	0.194431
Macc1	0.216242	0.0473809	-0.285843
Tpcn1	0.453235	0.198209	0.160336
Cd163	2.32167	0.73383	-0.210976
Aars	0.436919	0.365121	0.353063
Plxna2	-0.00194932	-0.23766	-0.36538
BC17647	0.100844	-0.0259372	-0.0421824
Hgs	0.810948	0.497976	0.466223
Lrp1	0.843567	0.80571	0.791655
B23312A22Rik	0.26467	0.301489	0.377189
Srp68	0.336588	0.165049	0.15975
Prkd3	-0.0144675	0.141416	0.185057
Gprasp1	-0.37928	0.0798472	0.15647
Ap1b1	0.902077	0.312128	0.0515744
Tbx2	-0.233554	0.663496	0.898772
493146P16Rik	-0.0970934	0.168168	0.0763901
Cdc4	0.104752	-0.0865421	-0.190653
Irx5	-0.0791526	0.10943	0.421256
Rdx	0.114177	0.193927	0.156971
Ndufs1	-0.254545	-0.598474	-0.82063
Gpr126	0.551525	0.128091	0.172797
Abce1	0.779933	0.311577	0.0355429
Smek1	-0.132959	-0.351738	-0.340073
Sos1	-0.50315	-0.278095	-0.195473
Rpap1	0.857789	0.564974	0.470961
Ppp5c	0.546479	0.0506449	0.0504822
Mesdc1	0.894538	0.831608	1.00133
Dpp8	-0.0357437	-0.0805901	-0.217652
Klhl15	-0.102895	-0.246879	-0.0618654
Eya1	-2.11321	-1.52587	-1.22365
Tbc1d16	-0.714663	0.792619	1.17973
Hspa1a	-0.0691042	-0.075813	-0.318108
Loxl4	-1.50041	-1.59166	-1.74425
Hhipl1	2.23447	3.60217	3.66661
Zfp71	0.350912	0.0672196	-0.134869
Fbxo33	0.680684	0.325687	0.204533
Lrrc8c	0.75871	0.476697	0.567896
Sec63	0.0163551	-0.132801	-0.185154
Gab2	0.548395	0.112491	-0.0956566
Prep	0.570164	0.42061	0.426389
Itgb6	-0.29213	-0.325689	-0.731614
Igf2bp3	-0.0396039	2.40773	3.38947
Atp1b1	-0.839371	-0.840737	-1.12455
Ehmt2	0.4352	0.565006	0.796644
Pnpla7	0.210069	-0.473445	-0.523168
Kbtbd2	0.53521	0.291105	0.12774
Gltscr1	0.100431	0.361636	0.392058
Kif3c	0.121398	1.0589	0.951543
Ttc7b	0.233668	0.148725	0.29643
Noc3l	0.240791	0.0171241	-0.116895
Letm1	0.894474	0.321446	0.315095
Fuk	0.135233	0.163491	0.150712
Phka1	-0.231929	-0.409922	-0.38534
Nacc2	0.378965	0.421098	0.572132
Plcb4	-0.496597	-0.831972	-1.14581
Rab11a	0.608941	0.0881948	-0.334025
A2346K3Rik	0.255604	0.178241	-0.0848233
Ttc15	-0.11806	-0.0774314	-0.111168
Phip	-0.0100371	-0.193106	-0.285156
Jmy	0.0348264	0.1016	0.0747562
Hivep3	0.787332	0.514225	0.384899
Fam18c	1.15309	0.634842	0.270943
Ric8b	-0.146162	0.0989691	0.273555
Pak2	0.576976	0.0402476	-0.080198
Stag1	0.140869	-0.09711	-0.0748001
Rasgrp3	-1.08078	-0.656785	-0.820634
Ciita	1.49697	1.3646	1.37735
Tesk1	-0.194812	-0.29515	-0.263858
Arap1	0.508393	0.18379	0.07358
Fyn	0.0151794	0.480687	0.786601
Has2	2.28025	1.59855	1.59407
Tsc22d2	0.481076	0.585627	0.368932
Luzp1	0.142653	-0.0955821	-0.124472
Tmcc1	-0.0622854	-0.129812	-0.259382
Ezh1	-0.878099	-0.748542	-0.653735
Nckap1l	2.62911	1.67741	1.29452
Stc1	0.862965	-0.0568383	-0.443256
Ddx1	0.335019	0.0766131	-0.0558329
Mybpc1	-3.24575	-3.07785	-2.67063
Eif4e	0.627104	0.0636577	-0.182762
Fam115a	-0.0880057	0.474374	0.513872
Rab2a	0.129678	0.304098	0.191577
D8331N3Rik	-0.102131	0.233827	0.22026
Tex2	-0.141867	-0.298175	-0.486151
Otud5	0.139307	0.216705	0.131439
Pam	-0.715335	-0.300802	0.0568751
Nup17	0.533045	0.0326788	0.0674594
Zfr	-0.152723	-0.34321	-0.285003
Dclk2	-0.576293	-0.171475	0.11465
Naa3	0.215347	0.109819	0.111923
Whsc1	0.660305	0.366743	0.502285
Crebzf	0.0530432	0.0271483	0.0696572
Capn6	-0.593881	1.31526	2.30434
Pole	0.860321	0.527071	0.621155
Usp5	0.729336	0.58753	0.474689
Klhl11	0.144929	-0.0763864	-0.0544504
Sestd1	0.242551	0.187818	0.136223
AI31418	-0.0656845	-0.0753708	-0.171003
Wwc1	-0.18682	-0.680338	-0.998263
Appbp2	0.390394	0.133172	0.025536
Cul9	0.0629221	-0.0655781	0.130979
Tbx15	-1.42526	-0.493151	-0.0259033
Kifc2	0.0897292	0.178611	0.130907
Bclaf1	0.111371	-0.0142786	-0.0755983
Top2a	1.70556	0.93837	1.02234
Sbf1	0.27812	0.164349	0.191896
Plag1	-0.598939	-1.04639	-1.18623
Zfyve9	-0.641884	-0.763182	-0.860024
Snx2	0.553236	0.212176	-0.0333166
Hexim1	0.663094	0.20389	0.200571
Ebf2	-1.25259	-0.473017	-0.534091
Zc3h3	0.186216	-0.0666573	0.122492
AI464131	-0.753571	-0.617035	-0.0621693
Med24	0.204362	0.0385295	0.0377669
Pacsin2	0.200875	0.0153871	-0.260644
Man1a2	0.574783	0.439999	0.372232
Rnf216	0.271972	0.2011	0.148693
Alms1	-0.377369	-0.38036	-0.225724
Pdzd4	-0.0800974	0.619927	1.37954
Dnajc7	0.245445	-0.0195482	-0.0887566
Lrsam1	0.418144	0.558083	0.505593
Col8a2	-0.180468	1.23186	1.46096
Gars	1.10744	0.908887	0.528998
Unc45a	0.689884	0.355138	0.294663
Sugp2	0.126138	0.0477223	0.135972
26131G19Rik	0.681791	0.482753	0.381778
Arvcf	-0.759816	0.0141307	0.220386
Slc12a2	-0.819088	-0.823113	-0.896302
Taf6	0.27133	-0.0720907	-0.0289023
Pde3b	-0.0416742	-0.252102	-0.264533
Fbxo3	0.397927	0.199586	-0.223225
Nol1	0.460061	0.225698	0.200754
Hells	-0.0830932	-0.00181563	-0.0215956
Eed	0.281965	0.019833	-0.223896
Ermp1	-0.329139	-0.41734	-0.766459
Dync1i2	0.392879	0.29342	0.146308
	0.397173	0.172024	0.139821
Cyfip2	0.488786	0.393536	0.583743
Srsf8	0.119796	-0.00535479	-0.0212451
Ctnna1	0.428002	0.164793	-0.0766387
Gm9766	-0.729645	-0.745702	-0.669775
Nid2	0.323873	0.949013	1.14044
Khsrp	0.856574	0.543815	0.604945
Stip1	0.593375	0.0892103	0.0556906
Abcb4	0.288296	-0.172663	-0.379912
Ppm1g	1.39285	0.715937	0.526504
Grin2d	-0.00398793	0.844897	0.895231
Amd2	0.580505	0.102084	-0.172903
Srebf1	-0.0744514	-0.233386	-0.316633
Spata2	-0.917847	0.409533	1.14539
Pde1b	0.516419	2.59463	2.86115
Abcf3	0.409563	0.237546	0.14692
Lepre1	0.390716	1.35536	1.58604
Ptpn9	0.537911	0.38877	0.453866
Ppp1r13b	-0.204984	-0.393134	-0.659302
Ehd1	1.36696	0.730209	0.444504
Capn5	-0.236003	0.325595	0.485771
Osbpl6	-1.01493	-0.528311	-0.00981183
Rps6ka1	1.39284	0.0364226	-0.115825
St7	0.0979414	0.211134	0.159058
Ywhaq	0.937386	0.573735	0.367239
Pde1a	0.680495	1.63755	1.4817
Tnxb	-0.533642	-0.187001	-0.704886
Fbxo11	0.15803	-0.0633728	-0.0811314
Ankar	0.0525603	-0.0475779	-0.176044
Dyrk2	0.0760933	0.039494	0.131276
Vav2	0.921334	0.803382	0.644587
Olfml2b	-0.0285168	2.4876	2.12595
Xpot	0.720431	0.470102	0.293624
Mtmr1	0.0123002	-0.106193	-0.390136
Dock7	0.244707	0.379311	0.459599
Slc6a9	-0.199299	-0.291121	-0.329161
Tbc1d19	-0.372429	-0.284885	-0.151795
Rybp	0.499704	0.0819706	0.504339
DQ539915	-2.54308	0.121907	-2.15785
Gan	-0.324126	-0.0824408	-0.366824
Abcd1	0.712657	0.524075	0.628247
	-0.393668	-0.637179	-0.161479
Ccnt1	-0.0447982	-0.173461	-0.156244
Smap2	1.64649	0.919222	0.632396
Zfp592	-0.0726107	-0.0764794	-0.122028
Atp2a1	-1.84933	-2.21761	-2.39209
Dis3l2	-0.215938	-0.222984	-0.347569
Mut	-0.625348	-0.601138	-0.646168
Myh9	1.65838	1.90024	1.46191
Chtf18	1.52462	1.16141	1.15948
Zdhhc5	0.519623	0.0394483	-0.0610476
Zw1	0.869388	0.723588	0.678441
42253	0.542348	0.325041	0.385552
Ank	-0.54772	-0.738607	-1.08042
Zhx2	-0.415281	-0.56216	-0.553647
Gpc3	-0.532964	0.552854	1.16204
Rap1b	1.28353	0.599085	0.256751
Enc1	1.14009	1.56825	1.54483
Slc6a14	1.30108	-0.577121	-1.60498
Rala	0.463	0.128942	0.191654
Dis3	0.0444178	-0.177883	-0.213186
Shoc2	0.303509	0.0830723	-0.0291163
Traf3	0.651764	0.48895	0.504386
Mtap1a	-0.510045	0.383547	0.581225
Ythdf2	0.264644	0.0359982	-0.133456
Ube4b	0.360237	0.279973	0.176079
Chd2	0.457896	0.341458	0.246887
Grip1	0.322666	0.297385	0.549345
Cramp1l	0.362663	0.307468	0.382195
Ubr1	0.014935	0.0591149	0.107209
Phtf2	0.258035	-0.231015	-0.403189
Aacs	-0.213095	-0.351456	-0.613674
Amfr	0.357852	-0.0171397	-0.172275
Azin1	0.492702	0.154416	0.0803563
Trim36	1.14074	0.955017	0.599606
	0.342154	0.118761	0.302081
Ctps2	0.261917	0.118782	-0.127109
Lnpep	-0.496636	-0.698805	-0.803947
Eml2	1.02156	0.313998	0.204819
Srpr	0.573483	0.339598	0.255325
Akt3	-0.382987	0.0993085	0.163609
Comp	-0.704616	-0.77484	-1.00288
Abr	0.785655	0.554893	0.600493
Rhot1	0.0289586	-0.147402	-0.225138
Exoc2	0.223807	0.0581886	-0.106593
Ephb3	0.166932	0.422833	0.6453
Scnn1a	0.0941599	0.0791236	-0.419835
Thsd1	-0.581195	-0.544259	-0.476457
Klhl2	0.0128442	0.089492	0.144684
Grin3b	-1.87898	-1.47133	-1.89111
Etfdh	-0.107752	-0.420041	-0.547027
Pik3cd	2.10431	1.18193	0.947627
Fam135a	-0.126352	-0.0558578	-0.300907
Pcbp3	0.4812	0.219529	0.507013
Mars	1.19171	0.665748	0.474005
Gpr116	-1.22981	-1.03238	-1.25819
Api5	0.913101	0.497825	0.357272
H6pd	1.41895	0.998365	0.838272
Rnf217	0.43245	0.215312	0.111011
Srp54b	0.232	0.0603451	-0.18438
Uvrag	0.714089	0.305479	0.282078
63419C18Rik	-0.51522	1.24568	1.57404
Ccar1	0.311866	0.0423138	0.0650382
Akap1	-0.747053	-0.489481	-0.703007
Ern1	0.719733	0.512291	0.441009
Abcc4	0.274256	-0.15689	-0.238119
Mll3	-0.42348	-0.487718	-0.416516
Ubash3b	0.467424	0.441097	0.208307
Zfp238	0.0898754	0.0735255	-0.0798889
Fam13a	-1.29216	-1.09699	-0.977327
Ccdc12	0.495652	0.202518	-0.242787
Gemin5	0.831691	0.415239	0.449137
Gart	0.821829	0.402984	0.392353
Zfp532	-0.0936382	0.420989	0.661748
Ranbp6	0.730798	0.386622	0.263802
Trim32	0.00816944	0.232947	0.460385
Ptpn23	0.380567	0.179348	0.302484
Mcm3	1.81454	0.987059	0.988796
Sec24c	0.629552	0.314261	0.247439
Gsk3b	0.375545	0.202421	0.114364
Pkn2	-0.0109136	-0.194936	-0.175407
Slc39a1	0.580314	0.449929	0.39088
18113L24Rik	0.419167	0.184927	0.1069
Ola1	0.302425	0.222268	0.00612596
Vps18	0.864479	0.463189	0.353797
Map2k4	0.187378	-0.19224	-0.444383
Adar	0.707323	0.137963	0.460184
Fnbp1l	-0.801153	-0.535387	-0.308038
Slc9a7	0.395098	0.445302	0.308554
Cdh22	0.529938	0.71839	0.736493
Wapal	0.0635377	0.0558664	-0.259998
Epm2aip1	-0.196264	-0.0120802	0.0150402
Fbln1	-0.22205	-0.334865	0.122113
Ube2b	-0.301146	-0.322974	-0.467379
Gpld1	0.221294	-0.121408	-0.580657
Kdm2b	-0.195134	-0.228027	-0.230843
Srf	0.595411	0.446145	0.307133
Cul2	0.471183	0.0256754	-0.0322481
Chn2	-0.216715	-0.165071	-0.157639
Cpxm2	-2.06206	-1.4955	-1.3155
Exoc8	0.647976	0.693824	0.562866
Mapk8ip1	0.208867	0.0232186	0.186412
Cul1	0.0392507	0.0289837	-0.060813
Nufip2	0.267817	0.0141488	-0.133792
Glud1	0.374701	0.0791335	-0.0972095
Itih5	-1.11296	-0.191658	0.416314
Slc41a1	-0.349501	-0.616422	-0.538051
Bahcc1	0.212741	0.948042	1.06518
Gnl2	0.587641	0.103889	-0.0360196
Prkcb	1.63657	1.06676	1.14
Itgb3	1.09449	2.71481	2.10865
Ctnnd2	-0.649726	-0.195379	-0.40685
Atn1	0.0775728	-0.0836503	0.798503
Tcf7l1	-0.422608	0.157356	0.635786
Slc45a4	1.37952	1.42873	1.4568
Cdh15	-1.16798	1.02306	0.343904
Nfe2l1	0.143664	0.228306	0.149811
FELE-1	-0.54567	-0.602284	-0.929246
Padi2	-0.52892	-1.20141	-0.970327
Usp1	0.462737	0.273617	0.255942
Card1	0.72567	0.455384	0.228502
Nr6a1	-0.278589	-0.307451	-0.311813
Smarcad1	-0.258969	-0.301531	-0.353002
Dnaja2	0.287519	-0.0338733	-0.183157
Abca7	0.469029	0.605633	0.908138
Hspa12b	-0.145081	-0.157032	0.254499
Eif2c4	0.609057	0.145075	-0.0405607
Arhgef17	-0.0878071	0.574713	0.821671
Osbpl11	0.58785	0.193234	0.0483225
Foxk1	0.272704	-0.0220444	0.253353
Palld	0.0853495	1.45227	1.29652
Rcor2	-0.417226	0.348765	0.520632
C3346G3Rik	-1.41329	2.10408	2.36107
Iars	0.391488	0.236681	0.0960776
Mast4	0.894774	0.346828	0.115576
Puf6	0.391218	0.201716	0.222223
Smg5	0.615443	0.295271	0.174766
Plod1	0.541691	0.856617	0.854712
Mecp2	-0.344039	-0.324713	-0.303418
Rai2	-2.02885	-1.66887	-1.35463
Gmeb2	0.523482	0.340945	0.200045
Itpripl2	0.944655	1.0591	1.09216
B4galnt4	0.852179	1.09752	1.29528
Sf3b3	0.691841	0.369708	0.272496
Pom121	0.763497	0.307434	0.282176
Adamtsl3	-1.53424	-0.956087	-0.619174
Mtss1	0.758114	0.23455	-0.0244448
Dlg1	-0.0161905	0.0605381	0.0375226
Trp53bp1	-0.296958	-0.167329	0.117631
Ift81	-0.387502	-0.149586	0.0746504
Dync1li2	0.152767	0.0937292	0.090577
Vac14	0.873868	0.354775	0.289008
Tbc1d8b	-0.449534	0.208281	0.351145
Nav1	0.609883	0.626779	0.551346
Inadl	0.191003	-0.128182	-0.336997
Tecpr1	-0.184657	0.210592	0.118704
Uhmk1	0.68987	0.342934	0.0346837
Trap1	0.411651	0.0107654	-0.0611181
Mtmr7	-0.55339	-0.545011	-0.220113
Cirh1a	1.15101	0.540411	0.392037
Lpar4	-0.736348	0.371027	0.728787
Grid1	-0.340912	0.0299407	0.868834
Wdr3	0.741711	0.219761	0.116447
Tbx3	-0.199478	-0.314985	-0.672262
Cc2d1a	0.171592	0.0801201	0.037256
Kif16b	-0.340311	-0.172375	-0.173219
Cecr2	0.138495	-1.18693	-1.22261
Slc16a2	0.353329	1.30287	1.33795
Ncstn	0.459314	0.193646	0.0849028
Wnt5a	0.385025	1.61367	1.58298
Colec12	0.206264	0.419416	0.0447481
Hsd17b4	-0.128848	-0.387981	-0.514929
	-1.56516	-1.36273	-1.16893
Prmt5	0.926563	0.374714	0.326986
Satb1	-0.0636761	0.418042	0.575966
Dsg3	2.24782	0.473984	-0.121191
Eef1a1	0.31279	0.250429	0.13628
Fam189b	0.0605392	0.498591	1.09311
Slc12a4	-0.196749	0.0275638	0.261524
Prickle1	0.145753	1.32433	1.28485
Zcchc14	0.396518	0.582195	0.59573
Ap3b1	0.431167	0.250243	0.166121
Nfasc	-1.0759	-0.188036	-0.0888476
Suz12	0.401275	-0.0162669	-0.0427153
Tcerg1	0.289703	0.048866	-0.0132146
Gse1	-0.0452471	-0.0159041	-0.108008
Ptpra	0.262729	0.107323	0.015374
Nol6	1.0996	0.518549	0.662189
Hivep1	-0.0723535	-0.281353	-0.456215
Klhl21	0.188099	0.0962588	-0.0180035
Pik3ap1	3.77938	2.28709	1.73518
Ino8	0.119645	-0.0463612	-0.105895
Ankrd5	0.666062	0.44163	0.456771
Ddx5	-0.0190893	0.177168	0.202969
Arf1	0.775444	0.430713	0.242807
Spire2	0.986709	0.202827	-0.0451055
Hspa4	0.743609	0.206301	-0.0125295
Bap1	0.34587	0.151003	0.202031
Vav3	1.61702	0.574792	0.383601
Mpdz	-0.951814	-0.372898	-0.256422
Plch2	0.581079	0.118824	-0.094218
Ppp1cb	0.25244	0.0613757	-0.138886
Gabpa	0.151862	-0.197073	-0.294182
4933424B1Rik	0.130808	0.0438874	-0.024563
Sdha	-0.361445	-0.459322	-0.710246
Tmem8	2.22518	1.25071	0.903921
Rufy1	0.568359	0.639455	0.533339
Sema6b	2.82152	1.73374	0.910295
Ankrd12	-0.662	-0.637158	-0.446763
Prpf3	0.053486	-0.159414	-0.0119418
Fbxl18	0.744073	0.514177	0.540568
Ptpre	1.28144	-0.0684087	-0.453146
Dpp4	-1.12411	-0.40779	-0.610454
Acss1	-1.55833	-0.823501	-0.400475
Sh2b1	0.262264	0.08879	0.14167
Dusp8	-0.867929	-0.731233	-0.652326
Lrrc8e	0.550625	0.121935	-0.580745
Mapk8ip3	0.0951772	-0.00911353	0.106949
Dpy19l4	0.180735	0.283411	0.196519
Hbp1	0.0395964	0.138253	-0.0378861
Trio	-0.518588	0.241484	0.314972
Lhx2	-0.613339	-0.725001	-0.658582
Topors	0.116251	-0.129589	-0.140679
Zbtb4	0.594627	0.402048	0.228781
Gpr173	-0.201713	0.98156	1.11538
	-0.37638	0.214693	0.388294
Spns2	-0.0675848	0.0846901	-0.527148
Kif13b	0.203872	-0.00794287	-0.198403
Vav1	3.25169	1.97009	1.36235
Fert2	-0.482868	-0.0658712	-0.249299
Slc5a9	-1.22532	-0.679736	-0.750206
Cttnbp2	-0.908826	-0.558759	-0.406139
Nckipsd	0.480708	0.378487	0.24489
Eif2c2	1.02892	0.440243	0.312345
Cacnb3	0.485662	2.11558	2.43365
Btbd3	0.277417	0.266377	-0.087175
Snx1	0.710868	0.489077	0.421296
Ccdc22	0.865949	0.473078	0.357354
Igf2r	0.372827	0.270733	0.194298
Fzd9	-1.23079	-1.69838	-2.02991
Alcam	-0.439767	-0.374438	-0.158692
Jag1	0.725777	0.39895	0.0517977
Polr2b	0.528572	0.181183	-0.0920346
Arcn1	0.700628	0.6381	0.563429
Zbtb16	-1.20752	-2.07637	-2.06488
Sh3rf2	-0.945525	-0.754523	-0.786314
Frem1	-0.886198	-0.766865	-0.0733
Mn1	-1.29298	-0.593533	-0.00154806
Slc25a12	-0.758934	-0.862077	-0.9328
Pls3	0.536603	0.0588738	-0.295983
	-1.06265	-0.54031	-0.773473
Cry1	-0.0849825	-0.57237	-0.437484
11114N23Rik	0.475204	0.358388	0.297214
Ppp2r5b	-0.250743	-0.00916308	-0.0766552
Enox2	-0.0489638	-0.396732	-0.498439
Atp12a	-0.00821329	-0.545674	-0.635505
Tars	0.653726	0.317971	0.151422
Rock1	0.154383	0.00913828	-0.171266
Mylk2	-2.71405	-3.23249	-2.71975
Tmem48	0.914071	0.163885	0.248216
Dpy19l3	0.308061	0.498076	0.65463
Slc9a9	0.116868	-0.290001	-0.457619
Tbl1x	0.472622	0.256474	0.187345
Larp4b	0.402918	0.0403686	-0.138815
Scara3	-0.244987	-0.30716	-0.435019
mKIAA1757	0.125905	0.179176	0.179258
Cnot3	0.164782	0.00996402	0.106687
Atp2b1	0.756746	0.390648	0.163287
Clint1	0.672012	0.251994	0.203746
Cdk5rap2	0.23325	0.126545	0.430242
Mtmr3	0.206234	0.135376	0.00949071
Ptprs	-0.218899	0.177326	0.710428
Ppfibp1	-0.25321	0.0323623	-0.116667
Inpp4b	-0.762542	-0.619583	-0.56538
Mmp2	1.16891	1.44499	1.28298
Dnajc16	0.466355	-0.00487412	-0.0336804
Agbl5	-1.01559	-0.692933	-0.548702
2313H1Rik	0.687968	0.372569	0.474116
Zfyve26	0.236503	0.00203543	-0.0165842
Wnk2	-1.03922	-1.12153	-1.28435
Slc2a13	-0.196011	0.218172	0.283243
Clcn2	-1.08034	-0.872646	-0.386316
Mocos	0.0907906	0.00680435	-0.259033
Cops2	-0.0307571	-0.2114	-0.349594
Kirrel	0.0667855	0.425502	0.638037
Gpc4	-1.02268	0.0375675	0.16423
Dll4	-0.477992	-0.632244	-0.663772
Wdr81	1.07337	0.849076	0.923136
Bmpr1a	-0.255881	-0.217805	-0.261399
Wdr9	1.14295	0.778886	0.998335
Strbp	-0.0773059	-0.355429	-0.31053
Chpf	-0.0415396	0.951035	1.0984
Accn2	-0.984156	-0.0589032	0.22979
Rgs12	-0.167297	0.412178	0.672275
Alpk3	-1.84806	-1.30463	-1.34838
Med17	0.1344	0.0548751	-0.192935
Synpo2l	-1.14486	-0.0017774	-0.126683
Trip1	-0.236591	-0.248807	-0.230651
Deaf1	0.167484	0.277317	0.30635
Larp1	0.7664	0.243044	0.235875
Hps6	0.376648	0.211164	0.336872
Fbxo46	0.406028	0.274757	0.345393
26111N1Rik	-0.110322	-0.222779	-0.255217
Plxdc2	-0.598523	-0.338855	-0.575399
Agap3	0.419826	0.331657	0.229568
Kbtbd8	0.69717	-0.259436	-0.331487
Herpud2	-0.0864867	-0.247769	-0.334254
Nsun2	1.00108	0.489774	0.440341
Csrp2bp	0.165107	0.0825565	0.343619
Megf9	-0.0922502	-0.40777	-0.524596
Hace1	0.140199	0.178955	0.109355
Fcho2	0.334067	-0.0316103	-0.252922
D14Abb1e	-0.0719802	-0.0924045	-0.196905
	0.623377	0.333657	0.169882
Mga	-0.453222	-0.262871	-0.17679
Eepd1	-0.242274	-0.215884	-0.615139
Usp19	0.476288	0.213307	0.230233
Rbm16	-0.123602	-0.14494	-0.138639
Fermt3	3.02486	1.91145	1.44109
Frmd3	-2.40497	-2.35308	-2.18677
Mib2	-0.837335	-0.336738	0.0227064
Tmem127	0.62062	0.402492	0.404152
Pdp1	-0.798594	-0.18648	-0.212484
C2396C1Rik	0.665895	0.562293	0.402633
	-0.890699	-0.379905	-1.16914
Xrcc5	0.333394	0.00471078	-0.231747
Fam4b	0.00446298	0.109672	-0.129909
Atp1a	0.16055	0.438121	0.256679
Taf5l	0.896545	0.429774	0.394051
Trpv2	0.812296	0.465296	-0.175417
Fbxl14	0.28775	0.325143	0.792456
Dcaf15	0.648033	0.274332	0.315102
Inpp5b	-0.00298209	0.343898	0.464483
Atg13	0.0439817	0.138136	0.118983
Ranbp1	0.212408	0.0228199	-0.0712495
Tm9sf1	0.790063	0.645407	0.561279
Tgm1	0.96051	0.439678	-0.1161
Ankrd44	0.580384	0.373929	0.236919
U2af2	0.830656	0.378322	0.344464
Capn2	0.537059	0.49549	0.295916
Cxxc5	-0.789661	-0.162823	-0.0170441
Sclt1	-0.200413	-0.325682	-0.170446
Ptprn	2.49362	4.22487	4.32733
Ppp1r16b	-0.414982	-0.512295	-0.555736
Tmem135	-0.356866	-0.357323	-0.291774
Sdk2	-0.0238746	1.31655	1.3595
Pias2	-0.180497	-0.0592956	0.112698
Atp6v1a	1.11498	0.580349	0.28246
Pknox1	0.78253	0.761205	0.732536
Arih2	0.302287	0.168311	0.129677
Plxnb1	-0.0351074	-0.273692	-0.319935
Ntrk2	-0.516654	-1.27245	-1.25682
Kbtbd1	-2.64104	-2.00156	-1.99987
Arih1	0.357437	0.257194	-0.00598588
Aoc3	-0.679496	0.0242516	-0.365353
Shcbp1	1.84467	1.16086	1.08015
Myst2	0.321794	0.116164	0.00141594
Tox4	0.347054	0.138945	0.0511469
Lphn1	0.138264	0.600186	0.976139
Nmt2	0.593484	0.288534	0.191689
Pgm2	-0.994471	-1.07872	-1.04534
Arntl	-0.589857	-0.373458	-0.932916
Solh	0.423154	0.591619	0.593526
Bptf	-0.033426	-0.0607576	-0.0166767
Angpt1	-0.734012	-0.0907622	-0.218327
Matn4	0.0595107	-0.860186	-0.417584
Maoa	-0.892634	-1.16256	-1.38875
Aff2	-1.17117	-0.401059	0.120496
Syde1	-0.0214935	0.285936	0.432995
Aloxe3	-0.138816	-0.0654199	-0.549298
Klhl29	-1.03351	-1.1808	-0.942628
Prkag2	-0.24127	-0.460386	-0.43982
Mcm7	1.20994	0.553032	0.624575
Oplah	-0.305545	-0.725924	-0.905894
Eml4	0.109237	0.0202952	-0.133439
Papss2	-0.770984	-0.52616	-0.800116
Epha2	1.10919	0.163517	-0.204894
Urb2	0.719572	0.252084	0.152796
Xpnpep2	0.991312	0.351176	-0.206434
Wbp11	0.292502	-0.0791094	-0.11075
Bbs2	-0.203178	-0.23581	-0.315961
Keap1	0.240815	0.117511	0.106052
Papss1	0.223377	0.290111	0.306918
Runx1t1	-1.05133	0.244731	0.944688
Hmha1	2.40434	1.33709	0.990601
Pkhd1l1	-1.3216	-0.712987	-1.05056
Men1	0.359304	0.324088	0.433363
Arhgef7	0.444686	0.3946	0.467158
Sema7a	0.390241	0.12475	-0.156917
Ubtf	0.137653	0.0152913	0.151033
Fndc3a	-0.170755	-0.0214683	-0.0658379
Mllt1	0.0774671	0.208186	0.286428
Tgm5	0.950279	0.356398	-0.273864
Col9a1	-1.27655	-0.555041	0.361402
Dock9	-0.661557	-0.751827	-0.842134
Mkl1	0.806826	0.697499	0.897439
Wdr43	0.752784	0.211563	0.0937562
Sox11	0.487522	2.64447	2.62745
543411K18Rik	0.0172507	0.134829	-0.0524516
Heatr2	0.825104	0.480454	0.298658
Trpc1	-0.548583	-0.09638	-0.121459
Tnn	-0.459634	3.24151	3.07915
Jmjd1c	0.303941	-0.076937	-0.10681
611F5Rik	-0.198224	0.0959471	0.118876
Baz1a	1.36578	0.760245	0.735604
Tmem62	-0.351045	-0.267989	-0.55573
Gucy1b3	-0.235539	-0.241222	-0.390385
Prdm2	0.177528	0.26282	0.366802
Mthfr	-0.0731551	0.0639604	0.128184
Zbtb44	-0.284849	-0.487644	-0.503995
Glb1l	-0.0913605	0.185169	0.335055
Fam178a	-0.155332	-0.290913	-0.102189
Uba6	0.735355	0.125221	-0.0294981
Mad1l1	0.884913	0.536582	0.595908
Ino8d	0.348523	0.169989	0.133868
Mios	-0.215515	0.105158	0.0864348
Dmwd	-0.0157391	0.0276509	0.412219
Tead1	-0.31223	0.132595	0.24472
Slc35f5	0.422956	0.341574	0.0559619
Foxn1	0.726936	0.136154	-0.405278
Pomgnt1	0.181263	0.0561636	0.0465701
Cars	0.654924	0.344786	0.134039
Crtc1	0.00511809	0.245499	0.540884
Glt25d2	-0.909494	-0.17406	0.0860157
Fermt1	1.02857	-0.227094	-0.419252
Ncapd3	0.376088	0.0940822	0.243917
Vps39	0.227667	0.139188	0.136056
Kif2c	2.35569	1.57613	1.39064
Gas6	-0.340606	0.199	0.306625
Chtf8	0.89017	0.364116	0.368096
Ilf3	0.22185	0.224812	0.436351
Atg4b	0.27271	0.208685	0.174213
Rif1	-0.106116	-0.347277	-0.279885
Polr1a	0.853009	0.645783	0.587033
1781L11Rik	-0.0647509	0.0160973	-0.0758619
Klhl24	-0.600416	-0.413214	-0.363071
Tardbp	0.573324	0.322042	0.306413
Mcoln1	0.249215	0.0781179	0.0299234
Tcf12	0.0963133	0.480701	0.644867
Tcf3	0.369825	0.585198	0.696072
Amot	-1.98194	-1.11505	-0.52016
Tmem183a	0.429257	0.13796	0.0279211
2781O15Rik	0.676302	0.924446	1.12975
Larp1b	-0.492652	-0.912107	-1.43335
Mknk2	0.856643	0.340676	0.286877
Man2a1	0.621081	0.649045	0.544477
Ahnak	-0.0728408	-0.232819	-0.42005
Bbs7	-0.567457	-0.241648	-0.155662
Hiat1	0.21301	-0.0112107	-0.14552
Scnn1b	0.92768	0.739581	0.172746
Tmco7	0.378658	0.154164	-0.000727804
Amotl1	-0.341955	-0.206562	-0.245608
Thsd4	-0.437517	-0.406841	-0.600474
Slc45a3	-0.328282	-0.131367	-0.487926
Nup85	1.09374	0.60818	0.566558
Tbc1d9	1.42712	1.01522	1.07314
F8	-0.0942582	0.404823	-0.123424
Acss3	-0.868733	-0.532691	-0.588782
Gtpbp1	0.415255	0.390943	0.18785
Smg8	0.0757648	-0.280957	-0.315866
Gm68	-0.395388	-0.521901	-0.499735
Atp1a2	-2.75777	-2.86877	-3.08983
Itgae	0.0562642	0.219628	0.403584
Son	0.43617	0.251312	0.20764
Atl3	0.230731	0.00580995	-0.160161
Dnaja1	0.418584	0.137007	-0.160399
Xpc	0.132309	0.12015	0.0974941
Eif4g2	0.787351	0.372304	0.304207
Dbn1	0.412699	2.16415	2.34612
Ankrd32	0.12484	-0.113682	-0.0531081
Snx18	0.760475	0.110502	0.0628954
Pdia3	1.15613	1.02092	0.947723
Col9a3	-1.77989	-1.78855	-1.04804
Rcc2	1.21643	0.647607	0.627584
Mll5	-1.04667	-0.440873	0.0159992
Vasp	1.84017	1.13868	0.972986
Bms1	0.772082	0.444644	0.289705
Mef2c	-1.46205	-1.16009	-1.17591
Eftud1	0.609055	0.396396	0.130383
Espl1	2.44108	1.59082	1.79116
Wiz	0.597627	0.43145	0.524216
Ddr1	-0.139303	-0.137838	-0.344047
Cgn	-0.964605	-0.446787	-0.698525
Rps6ka5	-0.190832	-0.378558	-0.166966
Mark4	0.622777	0.293743	0.464556
Fzd4	-1.49409	-1.78369	-1.37219
Mms19	0.156032	0.0728396	0.121532
Sp3	-0.061329	-0.125696	-0.167453
Caprin1	0.447416	0.285303	0.148844
Stat6	0.852044	0.302713	0.0176848
Zbtb41	-0.178331	-0.280857	-0.307927
Trim41	0.393929	0.192431	0.0422948
Rap1a	0.38691	0.09097	-0.111155
aatyk3	0.165758	0.670831	1.20406
Nap1l4	0.421385	0.301537	0.170216
Kif14	1.40962	0.890131	0.84793
Gm962	1.52782	1.12453	0.813695
Ybx1	0.34342	-0.197495	-0.244647
BC24479	-0.0383295	-0.0357417	-0.034879
Ankk1	1.38189	1.69418	0.818679
Itsn2	0.514578	-0.0187297	-0.373785
Ltbp2	0.597871	1.35694	0.958002
Naa15	1.0653	0.539904	0.293384
Pparg	-1.01279	-1.57559	-1.58699
Ankrd27	-0.021377	0.113745	0.260398
Mcm5	1.79813	0.732137	0.761578
Pak3	-1.51949	-1.01613	-1.0993
Ofd1	0.112638	-0.148514	-0.149912
Urb1	0.299454	-0.00705336	0.0349312
Bcar3	0.184655	-0.0663765	-0.167635
Reck	-1.05366	-0.728952	-0.376497
Usp39	0.417694	0.19134	0.0817582
Map3k1	-0.0934677	0.0252976	0.483994
Fes	1.13196	0.847599	0.878686
Zmpste24	0.609102	0.149257	0.015344
Ntrk3	-1.86983	-0.896974	-0.695111
Nuak1	-0.627251	0.416257	0.237536
Neurl4	0.205996	0.342106	0.32502
Slc6a19	0.741962	0.854784	0.0605348
Phf3	-0.0409007	-0.0518926	-0.0536152
Zfp131	0.239475	-0.0163084	-0.0635811
Sympk	0.628051	0.443363	0.437654
Dlat	0.15082	-0.307268	-0.338856
	0.445242	0.260887	0.165551
Pcnxl3	0.544099	0.362061	0.40918
Stk4	0.184205	0.106901	-0.111126
Fbxw7	0.0351616	-0.301576	-0.272985
Klhl31	-1.97618	-0.648169	-0.815177
Adarb1	0.294031	0.146054	-0.313445
Nmt1	0.456828	0.137502	0.0554725
Rhot2	0.796197	0.284897	0.21666
Pgm5	-1.42743	-0.493653	-0.732886
Tbc1d9b	0.42496	0.363908	0.417167
Ppp2r5e	0.167492	-0.0347882	-0.03269
Nudcd1	-0.534495	-0.561115	-0.631593
Col9a2	0.798921	1.47531	1.29677
Slc2a2	0.153742	-0.310729	-0.304011
Mgat4b	0.327269	0.0194292	-0.128899
Arhgap31	0.303278	0.37244	0.249663
Limk1	0.94205	1.05269	1.1034
Inpp5f	-0.0373876	-0.200008	-0.279771
F5	0.926355	0.576193	0.596802
Kcnc4	-0.0147427	-0.355813	-0.59674
Fam123b	0.000427551	0.139568	0.511388
Ptpdc1	-0.808108	-0.510449	-0.371371
Dyrk1a	0.185403	0.0331276	-0.0142688
Tshz2	-0.752984	-0.429704	-0.657843
Gm12824	-0.372509	-0.417829	-0.543006
Zfp73	-0.294752	-0.349173	-0.301943
Scaper	-0.648567	-0.493745	-0.531328
Cdk13	0.128234	-0.0788238	-0.101325
Braf	0.383327	0.192739	0.0220116
Pcbp1	0.566609	0.189323	0.224078
Gdpd5	1.03839	0.353625	0.256832
Cdh5	0.170733	0.148426	0.00131572
Gli3	0.212527	0.878788	1.3615
Ddx41	0.864686	0.491953	0.361994
Lats2	-0.0332785	-0.143198	-0.235556
Eif3l	0.608706	0.274541	0.102725
Zbtb17	0.552291	0.306009	0.366457
Npat	0.328246	0.188393	0.226966
Brip1	0.145892	-0.139494	0.0565828
Osbpl1	0.212272	0.640593	0.612243
Inpp4a	0.653722	0.0284684	0.148102
Fbxo38	-0.00492015	0.00234417	-0.0781393
Trpv4	-1.00023	-1.05137	-1.12924
Mkrn1	0.868371	0.551894	0.485492
Trim29	0.259393	-0.134002	-0.712991
Ints6	-0.0888142	-0.249277	-0.240604
Fbxl7	-0.811957	0.337504	1.11879
Zfp746	0.275727	0.264357	0.391578
Nsf	0.473028	0.392668	0.306106
Pigo	1.03656	0.814669	0.793255
Amotl2	0.203503	0.245674	0.241502
Senp1	0.337741	0.134575	0.113245
Fem1a	-0.040777	-0.297906	-0.400988
G3bp2	0.601207	0.131902	0.0374026
Get4	0.760943	0.515392	0.292886
Pla2g6	-0.373666	-0.673374	-0.0626503
Synj1	0.746241	0.440585	0.187575
Prrc2b	0.126516	0.116579	0.311322
Hdac5	-0.264652	-0.273916	-0.237793
Pygb	-0.60854	-0.744554	-0.636338
Nfia	-0.629675	-0.445072	-0.122995
Tmem132b	-2.07354	-2.17638	-1.99317
Sec61a1	1.42124	1.29579	1.10085
	-2.30005	-2.99628	-2.37926
Slc26a9	1.94443	1.17234	0.371343
Arid4b	0.151814	0.105174	0.167269
Pcca	-0.715379	-0.478291	-0.532296
Trappc1	0.213945	-0.00127952	-0.129452
Slc25a25	0.558784	0.172478	0.0370238
Ank2	-1.44541	-0.760813	-0.270708
Rusc2	-0.591551	-0.176882	-0.0319203
Med26	0.5106	0.226439	0.377239
Atl2	-0.263716	-0.314551	-0.396756
Tnks1bp1	0.398195	0.339807	0.34775
Rsbn1	0.081547	-0.146145	-0.150555
Chst2	1.21443	1.82714	2.36727
Unkl	0.122429	-0.090543	-0.196057
Ncapg	1.48765	0.775643	0.87058
Usp38	0.116086	-0.00640187	-0.138866
Gtpbp2	0.315274	0.500575	0.393713
Dym	-0.243141	-0.277862	-0.302199
Dnmt3b	1.47528	1.01105	1.01428
Rpn2	1.10241	0.875094	0.653039
Has3	3.43121	1.08539	0.887772
Gpr124	-0.0798642	0.190767	0.658518
Eya4	-1.96113	-0.919766	-0.752895
Hif1a	1.22954	0.32063	0.0622819
Bend5	-0.513387	0.271291	1.471
Usp42	0.069707	-0.0277806	0.0304883
Galntl1	-0.494323	1.48836	1.8504
	0.56518	0.270678	0.442107
Shb	0.552552	0.578417	0.354911
Tmem21	0.270448	-0.0691659	0.178572
Klhl13	-0.809936	-0.185278	-0.0460995
Atad2	0.627146	0.0420671	0.0664431
Pias3	0.125915	0.398185	0.599861
Fbxl4	-0.327076	-0.231457	-0.341475
Ttc26	-0.415664	0.144322	-0.106444
Plekha8	0.0488197	0.199317	0.37631
Mrvi1	-0.543703	-0.223708	-0.214559
Ly75	1.27268	1.05754	0.726393
Dock6	0.109001	0.161251	-0.0426719
Alox12b	0.136303	-0.0730975	-0.623968
Actr8	0.0386128	-0.135281	-0.143685
Il16	0.466101	0.00460607	0.464402
Fam63b	-0.283379	-0.364189	-0.397117
Meis1	-0.488883	0.276421	0.640656
Cpsf3	0.666506	0.069273	-0.0146587
Wdr2b	0.183768	0.0327716	-0.071569
Fam11b	0.290931	0.355469	0.720312
Ptprz1	1.53932	0.179235	0.106002
Cbfa2t2	-0.0709015	0.0472157	0.301075
Ptpn6	1.91559	0.653663	0.45683
Abcc9	-0.493981	-0.524801	-0.619177
Tubgcp2	0.210684	-0.10747	-0.0713717
Stxbp2	0.627132	0.013704	-0.257532
Arhgap18	0.14659	0.145248	0.12215
Pfkm	-2.25639	-2.08195	-1.97542
Tgm2	1.4534	1.17424	0.691496
	0.486527	0.273097	0.194121
Stk1	0.567222	0.342181	0.138232
Tm9sf2	0.276697	0.234415	0.200076
Slc7a2	0.0226699	-0.0540781	0.118902
Vasn	0.69473	0.645193	0.543197
Kif2a	-0.0411813	0.0339933	0.0344311
Gpd2	0.254254	-0.221816	-0.276509
Slc7a11	4.50744	0.884429	0.0349062
Gpam	-0.585228	-0.646742	-0.855041
Arhgap29	-0.849703	-0.656844	-0.652031
	0.280664	0.46647	0.736226
Heca	0.425068	0.178884	-0.068559
Ptbp2	-0.431826	0.0645449	0.278738
Ctnnal1	-1.23741	-0.885884	-1.223
Pvrl1	1.08713	0.284617	0.170451
Lmf2	0.746375	0.658318	0.469927
Sim2	-0.811635	-0.524166	-0.817604
Mapkap1	0.196524	0.131253	0.121237
Gnb2	0.854357	0.687874	0.677717
EF437385	0.401233	-0.0903197	-0.288194
Map4k3	-0.520353	-0.507314	-0.635604
492251C3Rik	-0.092496	-0.402667	-0.173174
Pdzrn4	-2.16198	-2.30798	-1.73975
Fam16a2	0.323217	0.0714512	0.208295
Arpp21	-1.80205	-0.70414	-0.836082
Lcp1	2.42441	1.08744	0.710193
Zbtb5	0.0521215	0.0773808	0.138911
Sbno2	0.781284	0.385303	-0.0140113
Mfi2	-0.931164	-1.37042	-1.66617
[truncated: 12,736 more rows]
