# Supplementary material for: Matrisomal components involved in regenerative wound healing in axolotl and Acomys: implications for biomaterial development
Source: Royal Society of Chemistry journal article supplement (doi:10.1039/d3bm00835e), 2023-01-01
Supplement: d3bm00835e9.xlsx [file d3bm00835e9.xlsx]

## Sheet: 1. Fold change calculation
symbol	0h_tpm	0h_tpm 0=1	5d_tpm	10d_tpm	14d_tpm		symbol	d5 FC	d10 FC	d14 FC
HSPA6	0	1	15.417	90.5565	0		HSPA6	15.4169	90.5565	0
MECOM	9.72132	9.72132	56.4503	473.032	382.081		MECOM	5.80685	48.6593	39.3034
MATN4	2.6299	2.6299	4.21382	47.0155	119.067		MATN4	1.60228	17.8773	45.2745
GPX7	3.16079	3.16079	9.46131	16.3379	15.3063		GPX7	2.99334	5.16892	4.84255
ACTBL2	3.41591	3.41591	16.4783	0	2.40975		ACTBL2	4.82399	0	0.70545
KRT13	2247.45	2247.45	510.602	96.5516	142.402		KRT13	0.227191	0.04296	0.063362
DSG1	0	1	4.56161	4.30919	1.66378		DSG1	4.56161	4.30919	1.66378
RPL21P28	178.054	178.054	41.0049	31.8323	82.2499		RPL21P28	0.230295	0.178779	0.461938
ERMAP	4.32253	4.32253	18.7218	10.0602	8.14234		ERMAP	4.33121	2.32739	1.8837
CYB5R1	0	1	6.35456	0	1.19037		CYB5R1	6.35456	0	1.19037
CADM1	32.326	32.326	8.38252	25.8677	5.73262		CADM1	0.259312	0.800214	0.177338
HS3ST3B1	1.44883	1.44883	9.06611	25.0125	11.4146		HS3ST3B1	6.25753	17.2639	7.87846
GAD1	1.21374	1.21374	11.8582	27.3323	20.5083		GAD1	9.77	22.5191	16.8968
CPZ	25.1841	25.1841	46.2708	74.6337	106.138		CPZ	1.8373	2.96353	4.2145
GJB2	0	1	0	0	0		GJB2	0	0	0
TMEM200B	1.24215	1.24215	0	7.53095	8.72308		TMEM200B	0	6.06284	7.02258
KAZALD1	5.1242	5.1242	542.249	611.765	270.024		KAZALD1	105.821	119.387	52.6958
DLX5	5.17318	5.17318	11.2055	11.7616	6.8117		DLX5	2.16607	2.27357	1.31673
KERA	35.001	35.001	49.2978	95.0154	75.8149		KERA	1.40847	2.71465	2.16608
S100B	0	1	0	0	1.81924		S100B	0	0	1.81925
KIF22	5.60346	5.60346	31.1873	35.5798	47.1641		KIF22	5.56572	6.34961	8.41696
HMGN1	0	1	4.85938	4.20664	7.09183		HMGN1	4.85938	4.20664	7.09183
PRR14	0	1	6.61434	0	3.0156		PRR14	6.61434	0	3.0156
MMP12	0	1	266.702	7.58451	1.64721		MMP12	266.702	7.58451	1.64721
GMFB	2.42394	2.42394	1.18435	1.66161	3.09011		GMFB	0.488605	0.685497	1.27483
PCP4	24.7413	24.7413	5.41327	0	47.4154		PCP4	0.218795	0	1.91645
LHX2	1.9942	1.9942	3.83961	15.1131	14.8797		LHX2	1.92539	7.57855	7.46149
TK1	11.451	11.451	42.9932	59.012	38.1976		TK1	3.75452	5.15342	3.33573
ZDHHC20	3.31864	3.31864	12.7794	35.2107	29.059		ZDHHC20	3.85079	10.61	8.75628
PRRX1	14.9524	14.9524	107.497	216.81	141.341		PRRX1	7.18924	14.5	9.45271
SLC2A10	0.858829	0.858829	4.13396	7.81041	8.02526		SLC2A10	4.81349	9.09426	9.34442
EPYC	0	1	0.892134	1.40461	4.88088		EPYC	0.892134	1.40461	4.88088
DHCR24	0.655321	0.655321	3.14807	1.98655	2.30102		DHCR24	4.80386	3.03142	3.51129
OIP5	6.63295	6.63295	25.204	14.3331	32.6111		OIP5	3.79981	2.16089	4.91652
S100A4	307.964	307.964	91.1901	5.01214	108.698		S100A4	0.296106	0.016275	0.352957
PPAPDC1B	0	1	13.9673	6.76638	11.7562		PPAPDC1B	13.9673	6.76638	11.7562
ZIC2	0.705149	0.705149	1.28084	61.5469	125.522		ZIC2	1.81641	87.2821	178.007
COL24A1	14.265	14.265	16.6083	23.7254	20.5743		COL24A1	1.16427	1.66319	1.4423
SQLE	19.821	19.821	15.5911	36.0514	35.607		SQLE	0.786598	1.81885	1.79643
PRDM16	1.74665	1.74665	4.20375	13.2371	15.3287		PRDM16	2.40674	7.57855	8.77603
TWIST1	14.2528	14.2528	18.718	65.2952	57.1939		TWIST1	1.31329	4.58121	4.01281
N4BP2L1	1.31082	1.31082	6.91763	3.61241	3.41016		N4BP2L1	5.27733	2.75584	2.60155
KRT35	0	1	0	0	0.88127		KRT35	0	0	0.88127
BTN3A1	7.13106	7.13106	10.9463	0	5.40619		BTN3A1	1.53502	0	0.758119
GLTPD1	0.407526	0.407526	1.96162	2.47076	1.07321		GLTPD1	4.81349	6.06284	2.63347
GSTM5	15.8198	15.8198	9.31299	0	0		GSTM5	0.588691	0	0
COL5A3	0	1	3.90755	0	5.9384		COL5A3	3.90755	0	5.93841
C17orf67	2.14498	2.14498	1.76997	0	1.61392		C17orf67	0.825169	0	0.752419
HNRNPH2	0.463372	0.463372	4.06125	2.45818	5.44462		HNRNPH2	8.76456	5.30499	11.75
OPTC	2.53964	2.53964	5.26003	11.2951	20.7075		OPTC	2.07117	4.44753	8.15372
FAM174B	2.10443	2.10443	3.53159	4.96453	0.718801		FAM174B	1.67816	2.35908	0.341565
MSLN	0	1	2.37596	3.11735	0.180541		MSLN	2.37596	3.11735	0.180541
NCF1	1.85536	1.85536	13.3961	11.2488	3.25735		NCF1	7.22023	6.06284	1.75564
FASTKD5	3.3339	3.3339	5.33145	13.4305	10.6951		FASTKD5	1.59916	4.02847	3.20799
SRD5A2	1.35577	1.35577	56.0189	53.4287	72.4665		SRD5A2	41.319	39.4085	53.4506
LPIN2	0.754885	0.754885	13.815	19.9546	8.93921		LPIN2	18.3009	26.434	11.8418
RBMXL2	3.52669	3.52669	33.2494	29.4845	25.0114		RBMXL2	9.42793	8.36039	7.09203
FAM83H	7.14166	7.14166	20.329	27.5788	21.74		FAM83H	2.84653	3.86168	3.04411
POLA2	2.14707	2.14707	7.02773	5.20694	13.1932		POLA2	3.27317	2.42514	6.14476
SHCBP1	5.64724	5.64724	8.73063	14.1174	14.8503		SHCBP1	1.546	2.49987	2.62966
SALL1	0.154315	0.154315	3.04545	28.1939	25.4667		SALL1	19.7353	182.704	165.031
TBXAS1	0.602357	0.602357	1.73966	0	3.17257		TBXAS1	2.88809	0	5.26694
FBXO5	12.6621	12.6621	20.501	27.8809	30.7281		FBXO5	1.61908	2.20191	2.42678
LIM2	0	1	2.96026	0	0		LIM2	2.96026	0	0
LEP	0	1	5.2586	22.7682	4.26154		LEP	5.2586	22.7682	4.26154
GBP2	1.09759	1.09759	2.64161	2.07953	4.01653		GBP2	2.40674	1.89464	3.65942
ERBB3	0	1	1.1992	0	1.09347		ERBB3	1.1992	0	1.09347
RNU1-1	1268.94	1268.94	2556.48	2601.75	2810.41		RNU1-1	2.01466	2.05033	2.21477
TIMP4	1.9286	1.9286	10.2116	5.84639	3.38593		TIMP4	5.29483	3.03142	1.75564
ALDH3A1	1.0647	1.0647	0	0	0		ALDH3A1	0	0	0
TMEM132C	6.87063	6.87063	4.13396	0	6.03873		TMEM132C	0.601686	0	0.87892
ERCC6L	0.471297	0.471297	4.53717	2.8574	7.37241		ERCC6L	9.62697	6.06284	15.6428
CLDN8	2.24921	2.24921	5.41327	3.40915	9.73382		CLDN8	2.40674	1.51571	4.32766
LIMK1	1.41389	1.41389	0	0	0		LIMK1	0	0	0
CCDC72	1.29871	1.29871	3.83939	4.02993	2.76481		CCDC72	2.95631	3.10303	2.12889
HMGA2	40.0587	40.0587	73.0545	163.22	196.029		HMGA2	1.82369	4.07452	4.89354
SCNN1G	1.39152	1.39152	2.67922	16.8731	1.22151		SCNN1G	1.92539	12.1257	0.877822
OTOS	24.1197	24.1197	16.9684	28.1219	70.4565		OTOS	0.70351	1.16593	2.92112
SNX20	1.20142	1.20142	4.62642	3.64201	3.1639		SNX20	3.85079	3.03142	2.63347
CRABP1	0.65728	0.65728	5.69485	7.96997	5.76975		CRABP1	8.66427	12.1257	8.77822
TNC	3.32062	3.32062	69.6109	83.146	41.0021		TNC	20.9633	25.0393	12.3477
HIST1H2AI	26.2099	26.2099	45.7517	36.3778	42.2885		HIST1H2AI	1.74558	1.38794	1.61345
ANKRD22	1.11604	1.11604	0	0	0.871921		ANKRD22	0	0	0.781262
PLBD1	7.52003	7.52003	303	96.4961	23.5307		PLBD1	40.2923	12.8319	3.12908
LECT1	22.9551	22.9551	6.82347	21.4863	37.6257		LECT1	0.297252	0.936013	1.63909
CAMK1	2.1986	2.1986	24.1775	38.1041	17.3698		CAMK1	10.9968	17.3311	7.9004
CCRL1	7.99491	7.99491	14.2938	13.8491	2.00518		CCRL1	1.78787	1.73224	0.250806
MMP13	1.32966	1.32966	45.6293	31.3636	10.7441		MMP13	34.3165	23.5877	8.08037
IQCB1	1.09179	1.09179	5.78087	5.79196	14.376		IQCB1	5.29483	5.30499	13.1673
DYNC1I1	28.8349	28.8349	127.022	171.259	90.7634		DYNC1I1	4.40517	5.93929	3.1477
DEPDC1B	7.41268	7.41268	27.6769	17.9139	17.1785		DEPDC1B	3.73373	2.41665	2.31745
CDK1	58.4147	58.4147	196.203	184.068	267.09		CDK1	3.35879	3.15105	4.57231
GRK4	0	1	2.78498	0	3.80917		GRK4	2.78498	0	3.80917
EDEM1	2.54863	2.54863	9.82827	16.5793	9.15701		EDEM1	3.8563	6.5052	3.59292
MELK	1.75788	1.75788	9.89514	13.7028	10.0412		MELK	5.62903	7.79508	5.71212
SOX11	5.63341	5.63341	29.5121	39.0616	25.0968		SOX11	5.23875	6.93392	4.455
PMEPA1	9.2511	9.2511	93.5864	86.9061	66.1677		PMEPA1	10.1162	9.39414	7.15242
HYAL4	0	1	0.883753	16.697	47.7056		HYAL4	0.883753	16.697	47.7056
RFX5	1.20471	1.20471	1.15977	0	4.2301		RFX5	0.962697	0	3.51129
LRTOMT	12.946	12.946	46.487	61.8932	47.8387		LRTOMT	3.59083	4.78087	3.69524
COL11A1	142.313	142.313	60.4475	103.27	119.959		COL11A1	0.42475	0.725653	0.842921
NCALD	0.776891	0.776891	5.95337	18.8407	12.6438		NCALD	7.66307	24.2514	16.2748
WFDC8	2.49455	2.49455	15.9263	44.6503	9.54938		WFDC8	6.38443	17.8992	3.8281
MUC5B	4.3278	4.3278	20.6462	13.0313	49.2549		MUC5B	4.7706	3.01107	11.381
RHOBTB1	2.15022	2.15022	5.17503	0	4.72822		RHOBTB1	2.40674	0	2.19895
FBLN1	12.2051	12.2051	21.4908	59.6294	127.406		FBLN1	1.76081	4.88561	10.4388
H2AFX	515.203	515.203	890.574	1200.86	1138.98		H2AFX	1.72859	2.33086	2.21074
PTPRG	1.95195	1.95195	30.5701	29.5751	18.5365		PTPRG	15.6613	15.1516	9.49644
SNORD103A	5.84346	5.84346	1.40637	0	14.0805		SNORD103A	0.240674	0	2.40962
FBN2	14.834	14.834	36.3487	44.5453	31.7145		FBN2	2.45037	3.00292	2.13796
MAD2L1	13.9993	13.9993	51.6715	51.8159	52.1186		MAD2L1	3.69101	3.70132	3.72294
OLFML1	21.8788	21.8788	19.4107	44.8791	45.2124		OLFML1	0.887192	2.05126	2.0665
LOC100133511	0.446417	0.446417	3.00835	8.11966	5.48624		LOC100133511	6.73888	18.1885	12.2895
DSCC1	24.5689	24.5689	45.4551	70.6593	88.8455		DSCC1	1.85011	2.87596	3.61618
DLGAP5	18.6752	18.6752	41.4199	43.9486	49.268		DLGAP5	2.21791	2.35331	2.63815
RAD51AP1	9.354	9.354	39.4415	61.608	30.0835		RAD51AP1	4.21654	6.58627	3.21611
LOC100128760	0	1	0	0	0		LOC100128760	0	0	0
RNU6-1	11.1294	11.1294	47.0243	30.9995	48.2346		RNU6-1	4.22525	2.78538	4.334
DSG4	0	1	0.868344	2.73431	0		DSG4	0.868344	2.73431	0
CCL24	6.40369	6.40369	123.509	45.2954	13.741		CCL24	19.2871	7.07332	2.14579
CDH11	43.002	43.002	77.6751	159.42	186.489		CDH11	1.80632	3.70728	4.33676
HPD	22.5448	22.5448	30.4203	15.9067	27.5448		HPD	1.34932	0.705556	1.22178
UHMK1	0	1	6.80028	10.6531	1.55019		UHMK1	6.80028	10.6531	1.55019
KRT14	0.012914	0.012914	7.12678	5.90151	1.49637		KRT14	551.866	456.987	115.873
PGGT1B	0.609031	0.609031	8.77123	10.1543	7.7627		PGGT1B	14.4019	16.6728	12.746
LRRC17	0	1	0	0	2.2976		LRRC17	0	0	2.2976
MMP14	13.3903	13.3903	125.7	118.583	89.5428		MMP14	9.38738	8.85591	6.68713
TMEFF2	8.2293	8.2293	8.50035	13.8116	23.7644		TMEFF2	1.03294	1.67834	2.88777
LOC729505	5.40565	5.40565	15.0348	8.95078	9.49041		LOC729505	2.78131	1.65582	1.75564
CNFN	38.3874	38.3874	114.431	22.0139	13.7968		CNFN	2.98095	0.573465	0.359409
PHF21A	1.90149	1.90149	8.23753	5.76423	5.00752		PHF21A	4.33214	3.03142	2.63347
UBE2C	62.8787	62.8787	165.701	179.945	185.267		UBE2C	2.63525	2.86179	2.94642
ARFGEF2	1.00335	1.00335	5.3126	2.28119	3.30068		ARFGEF2	5.29483	2.27357	3.28964
TM4SF1	0	1	1.18909	0	0		TM4SF1	1.18909	0	0
CPA6	2.70597	2.70597	0	4.10147	2.37536		CPA6	0	1.51571	0.877822
DNASE1L3	18.0831	18.0831	57.5578	59.5778	68.0974		DNASE1L3	3.18296	3.29466	3.7658
LOC100294015	21.2143	21.2143	22.9601	27.9837	32.5413		LOC100294015	1.08229	1.31909	1.53393
MEOX1	2.22551	2.22551	2.98246	3.49557	11.2695		MEOX1	1.34013	1.57069	5.06378
PLK1S1	0	1	1.1472	0	1.04606		PLK1S1	1.1472	0	1.04606
FGFBP2	10.5851	10.5851	14.2806	0	5.58067		FGFBP2	1.34912	0	0.527221
RLBP1	0	1	0	0	4.40696		RLBP1	0	0	4.40696
CYBB	25.0936	25.0936	114.142	35.6098	31.5351		CYBB	4.54863	1.41908	1.2567
MAB21L1	106.697	106.697	137.972	447.593	714.784		MAB21L1	1.29313	4.195	6.6992
AP1S1	0	1	4.74382	0	0		AP1S1	4.74382	0	0
TGM6	62.475	62.475	770.11	1014.42	422.004		TGM6	12.3267	16.2373	6.75476
KPNA2	168.488	168.488	415.606	499.537	497.724		KPNA2	2.46669	2.96483	2.95407
BUB1B	33.066	33.066	53.2937	57.7445	79.2108		BUB1B	1.61174	1.74634	2.39553
MDK	39.6271	39.6271	226.69	343.95	322.391		MDK	5.72058	8.67968	8.13562
MFAP3	0.404155	0.404155	6.22526	3.67549	2.39474		MFAP3	15.4032	9.09426	5.9253
KRT3	34.7533	34.7533	10.4715	4.82327	6.9073		KRT3	0.30131	0.138786	0.198752
CDCA5	9.79438	9.79438	45.0758	43.9815	41.1488		CDCA5	4.60221	4.49048	4.20127
GSTA5	7.66219	7.66219	6.59057	18.8373	0		GSTA5	0.860142	2.45847	0
GDF5	0	1	0	3.66203	2.12086		GDF5	0	3.66203	2.12086
RFTN2	2.2718	2.2718	6.07517	12.1973	10.8664		RFTN2	2.67416	5.36898	4.78316
KAL1	0.566563	0.566563	17.1199	29.0521	19.0524		KAL1	30.2172	51.2778	33.628
MYCN	28.0815	28.0815	57.9514	268.095	208.262		MYCN	2.06369	9.54705	7.41634
SP8	11.5547	11.5547	47.8441	50.6726	38.3292		SP8	4.14067	4.38546	3.31719
PCDHGA5	17.3768	17.3768	66.3303	68.9425	28.1909		PCDHGA5	3.81717	3.9675	1.62233
BRMS1L	0	1	6.14353	6.83578	3.95894		BRMS1L	6.14353	6.83578	3.95894
HIST1H2BN	2007.38	2007.38	4523.41	3620.21	4061.62		HIST1H2BN	2.25339	1.80346	2.02335
CCNB2	12.8738	12.8738	72.6727	67.0757	62.5469		CCNB2	5.64502	5.21026	4.85847
KIAA0317	2.10897	2.10897	1.01515	0	0		KIAA0317	0.481349	0	0
TTYH3	0	1	0	0	1.5755		TTYH3	0	0	1.5755
FAM119B	0	1	3.03453	4.7777	4.1505		FAM119B	3.03453	4.7777	4.1505
POTEE	12.6158	12.6158	39.7544	23.4858	27.8928		POTEE	3.15116	1.86162	2.21095
RBMXL1	0.429642	0.429642	6.61785	0.803967	7.36606		RBMXL1	15.4032	1.87125	17.1446
TRERF1	0	1	6.56872	0	2.66204		TRERF1	6.56872	0	2.66204
NFKBIL2	1.10761	1.10761	7.46404	0	0.972283		NFKBIL2	6.73888	0	0.877822
TMEM154	4.47932	4.47932	11.4993	13.5787	5.24273		TMEM154	2.56719	3.03142	1.17043
B3GAT1	0	1	1.7565	8.29654	1.60164		B3GAT1	1.7565	8.29654	1.60164
SNORA45	0.631782	0.631782	0.912322	1.57046	1.94107		SNORA45	1.44405	2.48577	3.07238
SLC13A1	1.39594	1.39594	2.68773	4.23167	11.0162		SLC13A1	1.92539	3.03142	7.89162
COL9A1	15.8171	15.8171	10.658	10.5106	87.1083		COL9A1	0.673827	0.664505	5.50722
TSKU	2.32042	2.32042	3.3508	3.51709	3.05538		TSKU	1.44405	1.51571	1.31673
SNX8	0	1	2.34525	0	2.13848		SNX8	2.34525	0	2.13848
IRG1	0	1	0	0	0		IRG1	0	0	0
COL9A3	6.09927	6.09927	5.25361	5.80375	43.2839		COL9A3	0.861351	0.951549	7.09658
AURKB	81.0098	81.0098	161.168	187.381	255.734		AURKB	1.98949	2.31307	3.15683
PMP2	32.3424	32.3424	34.6688	29.4812	14.3222		PMP2	1.07193	0.911532	0.442831
CCNB1	21.8223	21.8223	62.856	67.6866	68.935		CCNB1	2.88036	3.10172	3.15892
C9orf156	0.888324	0.888324	4.42987	0	8.90521		C9orf156	4.98677	0	10.0247
PRR11	2.57788	2.57788	11.5454	14.519	15.1096		PRR11	4.47863	5.63214	5.86124
GATSL3	0	1	1.20603	0	0		GATSL3	1.20603	0	0
RAD51	27.1377	27.1377	66.1812	74.972	97.9305		RAD51	2.43871	2.76265	3.60865
PLK1	10.8602	10.8602	45.9704	60.2834	62.9664		PLK1	4.23292	5.55085	5.7979
VWDE	17.3443	17.3443	55.9101	107.291	92.9367		VWDE	3.22355	6.186	5.35836
HS3ST3A1	0	1	0	2.33856	2.03156		HS3ST3A1	0	2.33856	2.03156
STC2	1.38713	1.38713	13.3806	33.6398	13.4185		STC2	9.64623	24.2514	9.6736
NDE1	0	1	8.03519	11.1081	4.53546		NDE1	8.03519	11.1082	4.53546
ST8SIA4	0	1	8.04786	7.60253	8.07217		ST8SIA4	8.04786	7.60253	8.07217
HHAT	3.28149	3.28149	10.9936	11.6055	12.0024		HHAT	3.35019	3.53666	3.65759
VPS4B	3.05201	3.05201	11.0889	7.87801	12.037		VPS4B	3.63331	2.58126	3.94396
CLEC11A	5.21911	5.21911	7.9916	28.0299	33.2426		CLEC11A	1.53122	5.37063	6.3694
GJB3	0	1	0.913038	0	1.6819		GJB3	0.913038	0	1.6819
FAM54A	3.49601	3.49601	16.0801	18.8407	21.298		FAM54A	4.59955	5.38919	6.09209
LOC100293629	105.45	105.45	103.394	116.9	97.9663		LOC100293629	0.980505	1.10858	0.929031
SRXN1	1.18523	1.18523	4.56407	10.7788	7.28295		SRXN1	3.85079	9.09426	6.14476
SCRT2	0	1	0.542519	1.20305	1.19143		SCRT2	0.542519	1.20305	1.19143
AGPAT5	1.14213	1.14213	4.3981	0	3.00776		AGPAT5	3.85079	0	2.63347
SERPINB1	1.56957	1.56957	4.80606	6.05349	5.23777		SERPINB1	3.06201	3.85677	3.33706
KRT71	4.64508	4.64508	5.87249	3.25077	2.28476		KRT71	1.26424	0.699829	0.491866
HTR5A	8.6137	8.6137	5.15455	8.11554	7.62592		HTR5A	0.598413	0.942167	0.885325
PRSS35	0	1	0	0	0		PRSS35	0	0	0
DPYSL4	0.916084	0.916084	3.17135	8.88652	10.2386		DPYSL4	3.46186	9.70055	11.1764
LOC729317	1.49433	1.49433	6.33255	0	11.4481		LOC729317	4.23771	0	7.661
HAUS6	1.61588	1.61588	10.8892	13.4767	12.0373		HAUS6	6.73888	8.3402	7.44942
GGA2	0	1	0	0	0		GGA2	0	0	0
PNLIP	0	1	1.84855	0	6.74229		PNLIP	1.84855	0	6.74229
SH2D4A	1.63769	1.63769	7.88301	4.96453	3.59401		SH2D4A	4.81349	3.03142	2.19456
COL8A2	0.527243	0.527243	1.01515	0	0		COL8A2	1.92539	0	0
LOC100291544	0	1	4.6905	3.69246	0		LOC100291544	4.6905	3.69246	0
KRT73	5.55436	5.55436	5.40955	4.68647	2.47038		KRT73	0.973929	0.843746	0.444763
FAM118B	0	1	2.46832	7.77246	2.25071		FAM118B	2.46832	7.77246	2.25071
DAPK3	0.317717	0.317717	2.14106	4.81567	2.78899		DAPK3	6.73888	15.1571	8.77822
SC4MOL	4.1958	4.1958	7.79583	9.32745	8.84084		SC4MOL	1.85801	2.22304	2.10707
PI4K2B	1.87915	1.87915	12.2051	13.2918	10.5462		PI4K2B	6.495	7.07332	5.61221
SLC25A24	2.68271	2.68271	18.5762	11.0897	14.9796		SLC25A24	6.92442	4.13376	5.58375
CTHRC1	46.529	46.529	90.2363	175.883	146.68		CTHRC1	1.93935	3.78008	3.15243
IGFBP2	121.683	121.683	20.5672	84.9297	99.6312		IGFBP2	0.169022	0.697958	0.818775
FAM120C	1.83983	1.83983	0.885601	0	0.807524		FAM120C	0.481349	0	0.438911
AURKA	7.15171	7.15171	20.8027	20.8398	27.3407		AURKA	2.90877	2.91396	3.82295
EIF5A2	8.40496	8.40496	16.1025	9.77597	18.8359		EIF5A2	1.91584	1.16312	2.24104
C3orf70	3.49864	3.49864	4.22397	18.3429	7.01227		C3orf70	1.20732	5.24287	2.00428
IFNGR2	0	1	0	0	0		IFNGR2	0	0	0
SNORD51	33.6737	33.6737	12.9828	0	18.2236		SNORD51	0.385546	0	0.541182
ZFYVE1	0	1	2.33273	2.56836	3.71865		ZFYVE1	2.33273	2.56836	3.71865
KRT6C	494.261	494.261	2117.86	1729.49	931.402		KRT6C	4.28491	3.49914	1.88443
MASTL	3.55056	3.55056	7.2715	6.71864	11.6733		MASTL	2.04799	1.89227	3.28772
LOC440330	0	1	4.1434	6.52354	3.14842		LOC440330	4.1434	6.52354	3.14842
ZNF526	0	1	1.19244	0	2.17463		ZNF526	1.19244	0	2.17463
FICD	0	1	10.4127	10.0888	6.93844		FICD	10.4127	10.0888	6.93844
B3GNT9	1.22827	1.22827	3.54735	0	0		B3GNT9	2.88809	0	0
CCNB3	27.2776	27.2776	72.9321	72.5465	75.6369		CCNB3	2.6737	2.65956	2.77285
STMN1	154.607	154.607	338.779	422.927	586.245		STMN1	2.19123	2.7355	3.79184
CKAP4	27.7426	27.7426	53.4128	57.255	56.0048		CKAP4	1.9253	2.06379	2.01873
LSS	0	1	1.82974	5.07736	2.48084		LSS	1.82974	5.07736	2.48084
TGM5	0	1	1.11448	16.962	4.91176		TGM5	1.11448	16.962	4.91176
GPR110	0.476403	0.476403	2.29316	4.33254	2.92738		GPR110	4.81349	9.09426	6.14476
C4orf27	59.9937	59.9937	89.4202	135.738	308.646		C4orf27	1.49049	2.26254	5.14464
C15orf17	0	1	3.9655	3.65242	0		C15orf17	3.9655	3.65242	0
C1QA	7.58961	7.58961	61.629	33.9905	22.9759		C1QA	8.12017	4.47855	3.02728
COL9A2	10.5502	10.5502	10.2256	9.54553	31.5643		COL9A2	0.969231	0.904775	2.99182
NEK2	2.6019	2.6019	12.0963	8.34097	16.3439		NEK2	4.64902	3.20573	6.28155
HRNR	0	1	7.90718	7.27868	0		HRNR	7.90718	7.27868	0
APITD1	2.56023	2.56023	8.62656	5.82086	7.9222		APITD1	3.36944	2.27357	3.09432
NKAIN1	1.0993	1.0993	4.23318	0	1.92998		NKAIN1	3.85079	0	1.75564
COL2A1	134.483	134.483	68.7434	122.59	197.627		COL2A1	0.511169	0.911565	1.46954
TGM3	79.742	79.742	1453.75	1754.13	776.31		TGM3	18.2307	21.9976	9.73527
ACTR5	0.53429	0.53429	2.5718	3.23931	2.76248		ACTR5	4.81349	6.06284	5.17037
RCC1	1.81203	1.81203	17.4444	31.1272	44.0078		RCC1	9.62697	17.178	24.2864
NANP	0	1	0	0	7.91787		NANP	0	0	7.91787
HOXC13	0	1	0.397668	1.87831	1.08782		HOXC13	0.397668	1.87831	1.08782
TRAF3IP2	0.746055	0.746055	10.8604	6.85335	5.30207		TRAF3IP2	14.5572	9.18613	7.10682
CDC42EP5	2.62259	2.62259	6.73268	7.95016	3.83694		CDC42EP5	2.56719	3.03142	1.46304
ZNF322A	0	1	0	4.28951	1.33563		ZNF322A	0	4.28951	1.33563
PSPH	10.9721	10.9721	8.61975	57.6435	51.2219		PSPH	0.785604	5.25363	4.66836
OTOR	98.4272	98.4272	73.0069	75.3422	55.3821		OTOR	0.741735	0.765461	0.56267
CDR2	0.527243	0.527243	0.507575	0	2.31413		CDR2	0.962697	0	4.38911
OCM2	1065.18	1065.18	155.887	9.99889	2.291		OCM2	0.146349	0.009387	0.002151
FDXR	0	1	1.1441	0	0		FDXR	1.1441	0	0
LMO1	1.26356	1.26356	2.02738	6.38399	17.7617		LMO1	1.6045	5.05237	14.0569
PRLH	1.25158	1.25158	11.7918	3.79405	4.02842		PRLH	9.4216	3.03142	3.21868
PXDN	25.5435	25.5435	53.549	97.6075	107.974		PXDN	2.09638	3.82123	4.22705
CDC14A	0.321198	0.321198	3.7106	1.94737	3.66541		CDC14A	11.5524	6.06284	11.4117
CENPA	24.4812	24.4812	50.6621	42.8151	50.4523		CENPA	2.06943	1.7489	2.06086
HOMER3	1.53213	1.53213	1.47497	0	0		HOMER3	0.962697	0	0
FDPS	7.48012	7.48012	29.9263	45.2185	60.306		FDPS	4.00078	6.04516	8.06217
KIAA1524	18.9683	18.9683	31.5413	36.5915	64.3327		KIAA1524	1.66284	1.92909	3.39159
NUSAP1	30.0764	30.0764	47.8921	40.9796	67.7759		NUSAP1	1.59235	1.36252	2.25346
GAS2	21.0051	21.0051	16.8242	14.526	31.6962		GAS2	0.800956	0.691548	1.50898
KIAA0101	70.0918	70.0918	343.577	286.585	318.383		KIAA0101	4.90181	4.0887	4.54238
MPPE1	15.167	15.167	14.4001	28.3294	19.1748		MPPE1	0.949435	1.86783	1.26424
CDCA7L	6.68688	6.68688	22.4201	30.0567	33.1588		CDCA7L	3.35284	4.49487	4.95879
SLCO4A1	0	1	3.39559	0	2.06415		SLCO4A1	3.3956	0	2.06415
EGFL6	8.16671	8.16671	8.94434	26.3827	37.3518		EGFL6	1.09522	3.23052	4.57367
C5orf13	68.7886	68.7886	56.4959	304.525	753.132		C5orf13	0.821297	4.42697	10.9485
CYP51A1	6.22937	6.22937	12.773	22.1854	19.2328		CYP51A1	2.05045	3.56142	3.08744
BRD8	2.40284	2.40284	9.71548	5.82722	8.97705		BRD8	4.04333	2.42514	3.73601
BMF	1.2895	1.2895	7.4484	19.5451	7.92368		BMF	5.77618	15.1571	6.14476
KIF11	19.6982	19.6982	78.3254	82.7478	111.021		KIF11	3.97627	4.20078	5.63608
FAM60A	0	1	3.01105	5.33072	7.586		FAM60A	3.01105	5.33072	7.58599
NCAPG	6.27013	6.27013	12.9889	19.527	27.5133		NCAPG	2.07154	3.11429	4.38799
CDCA8	43.6845	43.6845	87.0977	72.1137	142.837		CDCA8	1.99379	1.65078	3.26974
BAX	16.5724	16.5724	57.4031	60.2854	50.4317		BAX	3.46379	3.63771	3.04312
GTF2E1	0.523477	0.523477	5.03949	3.17376	5.05471		GTF2E1	9.62697	6.06284	9.65605
BAZ2A	0	1	0.982175	6.18551	1.79117		BAZ2A	0.982175	6.18551	1.79117
FLJ10357	0	1	1.76382	0	4.82495		FLJ10357	1.76382	0	4.82495
ASF1B	0.515499	0.515499	18.0096	9.25115	20.8565		ASF1B	34.9363	17.946	40.4588
TMEM135	1.41617	1.41617	2.38585	2.1465	2.94936		TMEM135	1.68472	1.51571	2.08263
CHRAC1	42.204	42.204	69.3519	82.2525	63.5802		CHRAC1	1.64325	1.94893	1.5065
TAS1R1	0	1	0	0	0		TAS1R1	0	0	0
KIFC1	31.3238	31.3238	115.143	128.345	118.197		KIFC1	3.67589	4.09735	3.77341
POLQ	0.723621	0.723621	1.85767	2.1936	5.08169		POLQ	2.56719	3.03142	7.02258
LYPLA2	0.410187	0.410187	11.8466	14.9214	10.4421		LYPLA2	28.8809	36.3771	25.4568
LOC654258	0	1	0.68498	0	1.87377		LOC654258	0.68498	0	1.87377
SLC44A5	3.19409	3.19409	9.22484	9.68265	26.1692		SLC44A5	2.88809	3.03142	8.19301
THAP3	2.71432	2.71432	7.83921	8.22826	9.53077		THAP3	2.88809	3.03142	3.51129
CRISPLD1	2.6859	2.6859	3.32448	1.16316	3.36821		CRISPLD1	1.23775	0.43306	1.25403
LOC653653	0	1	0	0	4.31029		LOC653653	0	0	4.31029
NR2F1	0	1	3.74617	11.7963	1.13863		NR2F1	3.74617	11.7963	1.13863
PRC1	8.9129	8.9129	20.565	25.2192	21.6201		PRC1	2.30733	2.82951	2.42571
RDH10	30.9662	30.9662	78.0911	80.6921	68.2579		RDH10	2.52182	2.60581	2.20427
PCDH18	13.776	13.776	23.0337	52.0329	72.4674		PCDH18	1.67202	3.77708	5.26042
ZBTB46	0	1	2.75185	2.72778	1.92998		ZBTB46	2.75185	2.72778	1.92998
COL25A1	0	1	7.96833	21.9549	17.2563		COL25A1	7.96833	21.9549	17.2563
DCK	4.15021	4.15021	16.261	19.7023	19.1352		DCK	3.91812	4.7473	4.61067
RAB31	2.85798	2.85798	14.9714	22.3153	19.9091		RAB31	5.23845	7.80807	6.96615
PLOD2	9.51563	9.51563	11.1999	6.93818	24.4745		PLOD2	1.177	0.729135	2.57203
CA5B	209.906	209.906	325.624	542.194	368.058		CA5B	1.55129	2.58304	1.75344
SNAI2	0	1	11.7181	9.22476	7.34595		SNAI2	11.7181	9.22476	7.34595
WDR86	0	1	1.22701	1.93185	1.67824		WDR86	1.22701	1.93185	1.67824
PHGDH	68.2457	68.2457	106.556	299.802	177.371		PHGDH	1.56136	4.39298	2.59901
PSAT1	31.9339	31.9339	81.9788	442.848	614.319		PSAT1	2.56714	13.8677	19.2372
MBTD1	7.72217	7.72217	6.94777	4.68808	8.61138		MBTD1	0.899717	0.607094	1.11515
TGFBI	23.373	23.373	140.112	253.742	353.37		TGFBI	5.99461	10.8562	15.1187
S100A1	0	1	6.28464	0	0		S100A1	6.28464	0	0
SLC25A36	1.74319	1.74319	9.22992	11.8898	6.50341		SLC25A36	5.29483	6.8207	3.73075
CHORDC1	6.7998	6.7998	9.81922	16.0095	14.2593		CHORDC1	1.44405	2.3544	2.09702
DHRS11	1.07118	1.07118	2.57806	9.74161	6.58686		DHRS11	2.40674	9.09426	6.14915
LOC729815	0	1	3.81941	0	0		LOC729815	3.81941	0	0
HLTF	21.124	21.124	30.5993	36.6002	41.6785		HLTF	1.44856	1.73264	1.97304
IGF2BP3	3.64409	3.64409	15.6043	14.5744	20.381		IGF2BP3	4.28208	3.99946	5.5929
WWTR1	2.86774	2.86774	9.98477	2.89778	4.19561		WWTR1	3.48176	1.01047	1.46304
GCNT4	1.35382	1.35382	5.7346	4.92479	3.56524		GCNT4	4.23587	3.63771	2.63347
GORAB	1.12894	1.12894	2.17365	6.84456	1.48651		GORAB	1.92539	6.06284	1.31673
TTLL1	1.03464	1.03464	7.96833	9.40925	4.54113		TTLL1	7.70158	9.09426	4.38911
MPP5	1.76358	1.76358	11.3186	16.0385	6.96651		MPP5	6.41798	9.09426	3.9502
ZNF469	1.17951	1.17951	4.31493	4.2907	2.69203		ZNF469	3.65825	3.63771	2.28234
TMEM170B	13.3092	13.3092	5.81779	0	1.26945		TMEM170B	0.437126	0	0.095382
HAPLN1	0	1	1.44642	0	3.07742		HAPLN1	1.44642	0	3.07742
CEP164	2.93147	2.93147	16.9327	41.4704	5.14662		CEP164	5.77618	14.1466	1.75564
CCNA2	16.2508	16.2508	54.9644	50.7806	55.8099		CCNA2	3.38226	3.12481	3.4343
FAM125B	0	1	0.54202	3.41351	1.4827		FAM125B	0.54202	3.41351	1.4827
LRCH1	0	1	0	0	0.705661		LRCH1	0	0	0.705661
NAPRT1	1.71097	1.71097	1.64715	5.18668	0		NAPRT1	0.962697	3.03142	0
SH2D5	0	1	7.57982	0	0		SH2D5	7.57982	0	0
ECT2	0.324097	0.324097	9.0988	13.2368	15.3745		ECT2	28.0743	40.8423	47.438
C5orf34	0	1	1.91546	4.82526	5.94539		C5orf34	1.91546	4.82526	5.94539
MMD	3.74484	3.74484	24.7408	19.0154	29.7509		MMD	6.60665	5.07776	7.94451
CCDC48	0	1	0	0	2.75712		CCDC48	0	0	2.75712
C21orf91	0.4734	0.4734	1.4103	0	1.48444		C21orf91	2.97909	0	3.1357
HDAC3	1.0993	1.0993	4.76232	9.99733	8.20242		HDAC3	4.33214	9.09426	7.46149
ZNF668	0.577061	0.577061	3.33321	1.74931	3.5459		ZNF668	5.77618	3.03142	6.14476
WWP2	1.57043	1.57043	2.83472	2.9754	3.4464		WWP2	1.80506	1.89464	2.19456
APEX1	29.4635	29.4635	77.524	133.148	134.951		APEX1	2.63119	4.51908	4.58029
ECM2	11.418	11.418	16.8645	11.7804	13.0454		ECM2	1.47701	1.03174	1.14253
LIMD2	1.15412	1.15412	6.66642	6.99726	7.0918		LIMD2	5.77618	6.06284	6.14476
ZWINT	23.9791	23.9791	36.6086	41.5375	41.2704		ZWINT	1.52669	1.73224	1.7211
ENTPD2	2.38573	2.38573	5.88683	2.26005	9.1558		ENTPD2	2.46751	0.947319	3.83773
RFC2	27.6221	27.6221	73.8749	92.4312	101.607		RFC2	2.67448	3.34627	3.67848
IP6K1	1.49058	1.49058	4.30492	0	10.4677		IP6K1	2.88809	0	7.02258
CMAS	5.38922	5.38922	9.98053	11.4964	8.28762		CMAS	1.85194	2.13322	1.53781
C9orf4	0	1	0.709075	2.23279	0		C9orf4	0.709075	2.23279	0
CDC20	43.9677	43.9677	141.016	131.906	118.513		CDC20	3.20727	3.00007	2.69545
USP44	1.99119	1.99119	12.0765	11.0662	23.7599		USP44	6.06499	5.55761	11.9325
HSPA5	45.8192	45.8192	147.107	168.324	122.192		HSPA5	3.21059	3.67365	2.66683
ROR2	5.75084	5.75084	34.2568	62.5841	72.6387		ROR2	5.95682	10.8826	12.631
LOC729535	1.75304	1.75304	0	10.4955	0		LOC729535	0	5.98706	0
TUBB2B	23.6477	23.6477	54.8058	73.2032	62.7004		TUBB2B	2.31759	3.09557	2.65143
RRAS	0.514895	0.514895	29.7462	24.7241	24.4073		RRAS	57.7715	48.0177	47.4024
ARNT	0.584734	0.584734	1.97023	1.77258	1.28323		ARNT	3.36944	3.03142	2.19456
F11	1.65308	1.65308	0.79571	2.5056	2.17667		F11	0.481349	1.51571	1.31673
AIF1	13.0106	13.0106	71.5554	26.0783	23.417		AIF1	5.49976	2.00438	1.79983
INCENP	5.39648	5.39648	19.7238	16.9231	13.6397		INCENP	3.65493	3.13595	2.52752
CHSY3	17.964	17.964	22.0652	31.4109	56.949		CHSY3	1.2283	1.74854	3.17017
H2AFJ	41.3016	41.3016	141.173	185.339	100.561		H2AFJ	3.4181	4.48746	2.4348
DICER1	6.54521	6.54521	8.70987	14.2308	13.1009		DICER1	1.33072	2.17423	2.00161
MBD3	10.6499	10.6499	24.9323	40.1993	50.048		MBD3	2.34108	3.77461	4.69938
HMGXB4	0.570325	0.570325	2.74525	1.72889	0.500644		HMGXB4	4.81349	3.03142	0.877822
TOP2A	4.10761	4.10761	22.6786	21.2544	27.115		TOP2A	5.52111	5.1744	6.60115
CCL3L1	7.1897	7.1897	10.6019	4.76915	9.66717		CCL3L1	1.47459	0.663331	1.34459
C5orf28	1.92018	1.92018	3.6971	0	3.37115		C5orf28	1.92539	0	1.75564
ECE2	0	1	2.43286	0	3.32755		ECE2	2.43286	0	3.32755
THSD4	28.0227	28.0227	43.361	22.9034	39.2131		THSD4	1.54735	0.817315	1.39933
COL8A1	17.5703	17.5703	2.22564	2.80332	8.11769		COL8A1	0.126671	0.159548	0.462012
PSCA	89.3879	89.3879	145.685	138.421	145.336		PSCA	1.62981	1.54854	1.62591
STX4	0.510116	0.510116	2.45544	3.09276	2.68675		STX4	4.81349	6.06284	5.26694
FGF8	0	1	1.17262	18.4623	13.9001		FGF8	1.17263	18.4623	13.9001
AGPHD1	5.96231	5.96231	4.30492	6.77785	15.0473		AGPHD1	0.722023	1.13678	2.52374
SASS6	5.31422	5.31422	8.36916	9.35125	7.6313		SASS6	1.57486	1.75966	1.43602
PAMR1	7.11876	7.11876	32.2918	34.0299	41.9717		PAMR1	4.53615	4.78032	5.89593
FAM32A	27.5772	27.5772	23.4717	27.5865	16.9321		FAM32A	0.851128	1.00034	0.613989
KIAA1598	1.14213	1.14213	0	10.3868	1.00259		KIAA1598	0	9.09426	0.877822
PSTPIP1	1.11604	1.11604	2.44965	0	0		PSTPIP1	2.19495	0	0
STRN4	0.66423	0.66423	5.43535	8.05424	1.74923		STRN4	8.18293	12.1257	2.63347
CORO1C	1.27234	1.27234	6.36936	9.25679	5.35659		CORO1C	5.00603	7.27541	4.21004
RCN1	66.0552	66.0552	116.874	141.735	111.187		RCN1	1.76934	2.1457	1.68324
LETMD1	2.36627	2.36627	14.0954	8.69084	13.2673		LETMD1	5.95681	3.6728	5.60685
ITM2C	4.70061	4.70061	23.1321	15.8969	7.15544		ITM2C	4.92107	3.38187	1.52224
C6orf170	0	1	0	0	1.08426		C6orf170	0	0	1.08426
HSD17B7	2.36621	2.36621	13.231	20.3234	16.6238		HSD17B7	5.59167	8.58903	7.0255
LARGE	0	1	1.51727	0	4.1505		LARGE	1.51727	0	4.1505
C12orf57	0.964481	0.964481	8.98551	6.28763	16.3866		C12orf57	9.31643	6.51919	16.9901
AQP3	5.96231	5.96231	11.0134	16.553	15.2305		AQP3	1.84718	2.77628	2.55446
NEDD4	1.27271	1.27271	3.36939	1.92906	2.79303		NEDD4	2.64742	1.51571	2.19456
MIR7-1	5.64782	5.64782	15.4586	6.08771	14.5285		MIR7-1	2.73709	1.07789	2.57241
NDC80	4.38386	4.38386	23.6394	26.0009	34.8016		NDC80	5.39236	5.93104	7.93857
KIF20A	2.18264	2.18264	17.831	22.3435	19.5088		KIF20A	8.16945	10.2369	8.93816
NEFM	1259.11	1259.11	744.39	183.44	135.116		NEFM	0.591203	0.14569	0.107311
ASPN	0.562302	0.562302	3.78929	0	0.893419		ASPN	6.73888	0	1.58886
LYSMD2	1.09383	1.09383	2.10606	0	3.84076		LYSMD2	1.92539	0	3.51129
PCGF3	2.13716	2.13716	4.37462	8.90811	5.79698		PCGF3	2.04693	4.1682	2.71247
HAUS2	1.14809	1.14809	9.94741	13.9214	8.04243		HAUS2	8.66427	12.1257	7.00502
HMGN2	2044.46	2044.46	2291.17	2697.82	3355.21		HMGN2	1.12067	1.31957	1.64112
RNASEH2C	114.652	114.652	215.562	191.771	216.034		RNASEH2C	1.88014	1.67264	1.88426
FDFT1	0	1	2.23964	2.45882	0.81606		FDFT1	2.23964	2.45882	0.81606
EFNA4	0	1	0	6.50233	1.88291		EFNA4	0	6.50233	1.88291
HTATSF1	1.89535	1.89535	6.93365	3.44736	9.407		HTATSF1	3.65825	1.81885	4.96321
SLC9A8	0.766063	0.766063	5.8999	4.64452	4.70055		SLC9A8	7.70158	6.06284	6.13598
ABCB8	15.2741	15.2741	25.9972	28.9778	26.5972		ABCB8	1.70204	1.89718	1.74132
LRRC41	0.588648	0.588648	5.6669	3.56888	1.6432		LRRC41	9.62697	6.06284	2.79148
TDG	41.9071	41.9071	178.973	268.673	197.841		TDG	4.27071	6.41116	4.72095
LOC728806	0	1	0	0	0		LOC728806	0	0	0
MEPCE	1.07775	1.07775	2.07509	16.3355	1.89214		MEPCE	1.92539	15.1571	1.75564
TRPV6	0.678162	0.678162	4.73849	11.1013	6.08164		TRPV6	6.98726	16.3697	8.96783
PCGF6	0	1	7.75307	9.7654	4.24172		PCGF6	7.75307	9.7654	4.24172
TUBGCP3	0.579342	0.579342	2.50979	7.34104	4.83131		TUBGCP3	4.33214	12.6713	8.33931
ZXDB	1.9689	1.9689	2.52727	9.94759	4.0328		ZXDB	1.2836	5.05237	2.04825
SUZ12	20.7856	20.7856	54.4527	55.1947	45.543		SUZ12	2.61973	2.65543	2.19109
PIAS4	0.312968	0.312968	7.53234	8.53865	5.76934		PIAS4	24.0674	27.2828	18.4343
CYB5RL	3.2979	3.2979	3.30717	10.4139	6.03119		CYB5RL	1.00281	3.15773	1.8288
EHF	34.2943	34.2943	6.55067	5.88511	12.7813		EHF	0.191014	0.171606	0.372696
NAT8B	3.68481	3.68481	7.09471	0	5.39101		NAT8B	1.92539	0	1.46304
PCDHGB1	0	1	1.73585	0	3.7629		PCDHGB1	1.73585	0	3.7629
SMC2	5.32587	5.32587	16.6852	16.4477	18.2347		SMC2	3.13285	3.08826	3.42381
FAHD2A	1.82267	1.82267	5.70272	4.14397	1.99998		FAHD2A	3.12877	2.27357	1.09728
PTPN1	4.94763	4.94763	19.6476	18.7479	17.8612		PTPN1	3.97113	3.78928	3.61004
TSPAN18	3.33965	3.33965	6.43014	3.37463	1.95441		TSPAN18	1.92539	1.01047	0.585215
PTPRA	9.35558	9.35558	42.4166	45.7692	28.419		PTPRA	4.53383	4.89218	3.03765
NTM	0.718637	0.718637	0.554834	0	0		NTM	0.772064	0	0
ADAMTS3	2.4782	2.4782	4.41731	2.99104	2.20202		ADAMTS3	1.78247	1.20694	0.888559
CDCA3	2.73448	2.73448	13.4002	11.1334	12.8431		CDCA3	4.90047	4.07151	4.69672
C2orf18	1.20637	1.20637	1.74205	0	0		C2orf18	1.44405	0	0
SHC1	0.754237	0.754237	3.99356	2.28641	5.62773		SHC1	5.29483	3.03142	7.46149
VSIG4	0.781378	0.781378	6.95813	4.73737	1.5433		VSIG4	8.90495	6.06284	1.9751
MEFV	81.066	81.066	33.6716	18.5688	46.2504		MEFV	0.415361	0.229058	0.570528
EPHA4	6.91144	6.91144	6.26531	21.9494	55.7845		EPHA4	0.906513	3.17581	8.07133
ADAMTS12	3.61084	3.61084	2.31743	2.43244	0.352186		ADAMTS12	0.641798	0.673649	0.097536
PSRC1	0	1	7.9571	5.01119	4.35334		PSRC1	7.9571	5.01119	4.35334
ANAPC1	2.56109	2.56109	15.184	13.1387	12.6625		ANAPC1	5.92873	5.1301	4.94417
ELAC2	1.32846	1.32846	0	2.01356	6.41384		ELAC2	0	1.51571	4.82802
SLC35E1	1.39816	1.39816	1.346	2.1192	1.22733		SLC35E1	0.962697	1.51571	0.877822
KIF23	7.34693	7.34693	22.8205	23.4549	21.445		KIF23	3.10613	3.19248	2.91891
PDZK1IP1	0	1	0	0	0		PDZK1IP1	0	0	0
TMEM35	0.419981	0.419981	6.06472	2.54628	5.16136		TMEM35	14.4405	6.06284	12.2895
GSG2	4.59638	4.59638	29.4995	4.64452	32.2784		GSG2	6.41798	1.01047	7.02258
SLC7A5	2.11404	2.11404	4.72976	10.2537	16.3306		SLC7A5	2.23731	4.85027	7.72484
PRPF31	55.3117	55.3117	91.319	99.9366	161.412		PRPF31	1.65099	1.80679	2.91823
WNT5B	3.70476	3.70476	18.0075	34.9717	21.1802		WNT5B	4.86064	9.43967	5.71703
SCRN1	0.460875	0.460875	1.31287	2.11856	5.09356		SCRN1	2.84864	4.59683	11.0519
TCN1	8.29661	8.29661	146.693	35.7063	8.99658		TCN1	17.6811	4.30373	1.08437
AASDHPPT	21.9283	21.9283	21.1103	24.4904	41.2337		AASDHPPT	0.962697	1.11684	1.88039
ORC6L	2.7458	2.7458	10.5697	9.51277	11.7073		ORC6L	3.84941	3.46448	4.26371
MSX2	0	1	4.59573	9.64761	2.7937		MSX2	4.59573	9.64761	2.7937
LMNB2	41.6859	41.6859	129.086	176.426	172.965		LMNB2	3.09664	4.23227	4.14925
LRRC29	1.33654	1.33654	6.4334	4.0516	1.17324		LRRC29	4.81349	3.03142	0.877822
HMGCS1	12.4963	12.4963	21.7682	30.8801	26.0793		HMGCS1	1.74197	2.47114	2.08696
CKAP2	7.1199	7.1199	6.42332	15.2089	9.04626		CKAP2	0.902165	2.13611	1.27056
PRICKLE1	9.13527	9.13527	20.165	27.6781	17.2095		PRICKLE1	2.20738	3.02981	1.88386
NCAPH	9.19383	9.19383	26.4196	30.9503	39.9349		NCAPH	2.87362	3.36642	4.34366
PRICKLE2	0	1	13.3816	10.3252	1.51289		PRICKLE2	13.3816	10.3252	1.51289
EXOC3L	0.623717	0.623717	1.80135	1.89075	3.28508		EXOC3L	2.88809	3.03142	5.26694
KRT10	8.90841	8.90841	50.0978	60.8233	18.971		KRT10	5.62365	6.82763	2.12956
LMO3	0	1	0	5.41128	8.88993		LMO3	0	5.41127	8.88993
SFRS1	130.712	130.712	465.34	435.461	502.695		SFRS1	3.56004	3.33145	3.84582
GPR180	1.55653	1.55653	5.99388	16.5148	7.50814		GPR180	3.85079	10.61	4.82363
DKK1	2.1986	2.1986	5.29147	0	1.92998		DKK1	2.40674	0	0.877822
KRT222	12.9329	12.9329	5.81024	7.84104	11.3528		KRT222	0.449259	0.606284	0.877822
EBF3	5.13746	5.13746	2.81177	5.19025	5.21617		EBF3	0.547309	1.01028	1.01532
CSPG5	1.95258	1.95258	0.751896	1.18382	1.02841		CSPG5	0.385079	0.606284	0.526693
C3	0.867143	0.867143	17.1497	35.5134	24.222		C3	19.7773	40.9545	27.9331
RCE1	1.4731	1.4731	4.96352	4.46559	2.58624		RCE1	3.36944	3.03142	1.75564
MTBP	0.360426	0.360426	7.28661	8.74084	6.32781		MTBP	20.2166	24.2514	17.5565
MYB	21.1157	21.1157	17.3054	21.0428	15.2242		MYB	0.819552	0.996548	0.720993
CDC23	2.09843	2.09843	12.9614	11.0346	17.7725		CDC23	6.17674	5.25853	8.46944
CHAF1A	4.75373	4.75373	24.5379	26.201	24.4743		CHAF1A	5.16181	5.51168	5.14843
ATP6V1G1	1.07183	1.07183	7.73889	2.43689	2.11698		ATP6V1G1	7.22023	2.27357	1.9751
SLC45A4	1.94566	1.94566	2.34136	1.47453	1.70795		SLC45A4	1.20337	0.757855	0.877822
SH2D2A	0	1	0	0	0		SH2D2A	0	0	0
C7orf11	9.22399	9.22399	29.507	35.2159	27.527		C7orf11	3.19894	3.81786	2.98428
LMAN1	49.8489	49.8489	70.6877	99.3901	88.2658		LMAN1	1.41804	1.99383	1.77067
TADA2B	0	1	0	0	1.01578		TADA2B	0	0	1.01578
SLC35F1	5.97967	5.97967	6.39588	4.00594	3.08565		SLC35F1	1.0696	0.669927	0.516024
EPS8L2	1.46086	1.46086	2.34395	0	0.42746		EPS8L2	1.6045	0	0.292607
ODZ4	1.0647	1.0647	0.937858	2.48521	13.7326		ODZ4	0.880868	2.33419	12.8981
UQCC	79.5077	79.5077	136.513	138.693	149.979		UQCC	1.71697	1.7444	1.88635
ALS2CR4	1.08039	1.08039	12.4811	8.18782	5.92746		ALS2CR4	11.5524	7.57855	5.48639
TFDP2	5.47236	5.47236	19.8333	40.0088	37.8649		TFDP2	3.62427	7.31107	6.91931
RRM2	113.039	113.039	282.037	301.389	356.561		RRM2	2.49504	2.66624	3.15432
MED28	96.937	96.937	159.332	235.966	247.045		MED28	1.64366	2.43422	2.54852
EPX	0	1	0	0	0		EPX	0	0	0
UHRF1	24.038	24.038	102.255	103.828	148.689		UHRF1	4.25388	4.31933	6.18559
HOXC5	7.78266	7.78266	4.37053	0	3.98521		HOXC5	0.561573	0	0.512063
MYO9B	2.68862	2.68862	11.0657	10.718	9.12305		MYO9B	4.11575	3.98643	3.39321
RAPSN	1.98519	1.98519	9.87104	6.01796	5.22794		RAPSN	4.97233	3.03142	2.63347
LSM6	65.8035	65.8035	87.7226	129.757	200.009		LSM6	1.3331	1.97189	3.0395
CXorf38	0	1	1.05565	3.32413	0		CXorf38	1.05566	3.32413	0
HNRNPH1	359.511	359.511	672.61	592.241	773.431		HNRNPH1	1.8709	1.64735	2.15134
UGDH	55.9555	55.9555	265.291	299.629	155.402		UGDH	4.74111	5.35478	2.77724
CYBRD1	0	1	7.57857	10.2274	1.97441		CYBRD1	7.57857	10.2274	1.97441
SFRS3	201.163	201.163	476.074	566.56	620.254		SFRS3	2.36661	2.81643	3.08335
PPP1R10	1.07616	1.07616	2.33104	3.90172	1.71365		PPP1R10	2.16607	3.62558	1.59237
LRP11	1.54831	1.54831	3.27922	3.75487	1.9028		LRP11	2.11793	2.42514	1.22895
FABP5	235.488	235.488	273.814	157.589	235.229		FABP5	1.16275	0.669201	0.998901
SPOP	5.5809	5.5809	11.5188	9.06787	12.5552		SPOP	2.06398	1.62481	2.24967
ENY2	30.4839	30.4839	65.6101	89.8925	158.623		ENY2	2.15229	2.94885	5.2035
CCDC43	35.1109	35.1109	88.0976	129.621	96.3408		CCDC43	2.50912	3.69175	2.7439
LGALS9	41.3502	41.3502	161.578	97.2953	76.2649		LGALS9	3.90755	2.35296	1.84437
TBC1D9	0.258203	0.258203	1.79469	0	0.931559		TBC1D9	6.95067	0	3.60785
NOD2	1.30481	1.30481	1.25614	0	2.29078		NOD2	0.962697	0	1.75564
ESPL1	2.44065	2.44065	6.68819	7.84413	7.0825		ESPL1	2.74033	3.21395	2.90189
KIF2C	1.06728	1.06728	7.81082	11.0003	4.68442		KIF2C	7.31842	10.3068	4.38911
LOC100128683	69.1689	69.1689	8.35976	0	6.58138		LOC100128683	0.12086	0	0.095149
IL31RA	1.04945	1.04945	2.01051	0	1.84246		IL31RA	1.91577	0	1.75564
DR1	7.49967	7.49967	18.411	14.4617	20.7029		DR1	2.4549	1.92832	2.7605
MAN1C1	3.72644	3.72644	1.79372	5.64821	6.54231		MAN1C1	0.481349	1.51571	1.75564
FOXN2	0	1	1.50468	4.73807	2.28671		FOXN2	1.50468	4.73807	2.28671
ZNF561	6.07348	6.07348	8.87563	14.729	22.3921		ZNF561	1.46137	2.42514	3.68685
NKIRAS2	0	1	7.97208	5.02063	2.18077		NKIRAS2	7.97208	5.02063	2.18077
P2RY10	0	1	3.26466	3.42668	2.97684		P2RY10	3.26466	3.42668	2.97683
CASC5	2.45997	2.45997	9.47284	3.72861	8.09782		CASC5	3.85079	1.51571	3.29183
TCF4	11.1953	11.1953	20.2303	28.3819	43.3861		TCF4	1.80704	2.53517	3.87539
GLIPR2	0	1	0.568088	0	0.417745		GLIPR2	0.568088	0	0.417745
VANGL1	0	1	4.87746	7.92496	5.05788		VANGL1	4.87746	7.92495	5.05788
CCDC15	6.42029	6.42029	13.5207	29.7489	23.3884		CCDC15	2.10594	4.63357	3.64289
TMEM45A	7.52463	7.52463	6.79119	14.2564	14.4449		TMEM45A	0.902529	1.89464	1.91969
SYDE1	0	1	0.93862	2.9556	1.71174		SYDE1	0.93862	2.9556	1.71174
LRRC38	0.884749	0.884749	2.55524	0	0		LRRC38	2.88809	0	0
H2AFZ	1077.47	1077.47	1672.08	2241.11	3261.97		H2AFZ	1.55185	2.07996	3.02742
MAD2L1BP	5.44208	5.44208	9.68706	16.4972	15.3921		MAD2L1BP	1.78003	3.03142	2.82834
DNAJB11	62.9187	62.9187	184.549	187.423	165.088		DNAJB11	2.93314	2.9788	2.62383
TRIB2	23.8259	23.8259	47.249	100.635	66.0942		TRIB2	1.98309	4.22378	2.77405
ZNF362	1.23952	1.23952	8.94366	16.0822	7.07252		ZNF362	7.21542	12.9745	5.70585
CKS1B	55.2038	55.2038	102.059	107.628	117.29		CKS1B	1.84876	1.94965	2.12468
HSPA13	3.04224	3.04224	18.2529	12.0599	9.44962		HSPA13	5.99983	3.96417	3.10614
KDELR3	54.8431	54.8431	53.0377	71.3058	53.9699		KDELR3	0.96708	1.30018	0.984077
KIAA1033	0.978243	0.978243	1.8835	0	2.85526		KIAA1033	1.92539	0	2.91876
PPCDC	8.29972	8.29972	7.9372	18.3284	13.5292		PPCDC	0.956322	2.20832	1.63008
PPP1R3C	3.78254	3.78254	33.1895	32.2495	21.0472		PPP1R3C	8.77438	8.52587	5.5643
FEN1	22.3008	22.3008	102.585	99.236	79.6274		FEN1	4.60006	4.44989	3.57061
HDAC2	130.894	130.894	170.112	295.216	301.461		HDAC2	1.29961	2.25538	2.30309
SMOC2	0.908513	0.908513	1.74925	0	4.78508		SMOC2	1.92539	0	5.26694
ST8SIA6	3.90065	3.90065	2.30377	1.81357	2.62583		ST8SIA6	0.590612	0.464942	0.673177
HIST1H2BA	4.39137	4.39137	32.0464	70.9271	43.463		HIST1H2BA	7.29758	16.1515	9.89736
SCRG1	2.94456	2.94456	10.457	8.12283	8.81129		SCRG1	3.55128	2.75859	2.9924
FUT2	0.306639	0.306639	0.590401	0	0.269175		FUT2	1.92539	0	0.877822
LCTL	1.2147	1.2147	4.67754	7.36452	1.06629		LCTL	3.85079	6.06284	0.877822
BCL2L11	18.3802	18.3802	64.7864	52.6913	35.9895		BCL2L11	3.52479	2.86674	1.95806
CEACAM5	1.85016	1.85016	10.1287	5.6086	1.62411		CEACAM5	5.47454	3.03142	0.877822
DHODH	1.86718	1.86718	4.49382	8.4903	10.6538		DHODH	2.40674	4.54713	5.70585
LNX2	1.52548	1.52548	0.367144	3.46828	3.01298		LNX2	0.240674	2.27357	1.9751
MEX3B	7.05653	7.05653	34.4583	90.5509	104.179		MEX3B	4.88318	12.8322	14.7634
CASP10	8.27823	8.27823	16.9608	7.38083	12.4305		CASP10	2.04885	0.891595	1.50159
KRTAP9-2	0	1	24.2356	26.483	0.849959		KRTAP9-2	24.2356	26.483	0.849959
ZNF775	0	1	2.86656	5.24794	4.24748		ZNF775	2.86656	5.24794	4.24748
S1PR3	2.49841	2.49841	4.81043	15.1475	5.4829		S1PR3	1.92539	6.06284	2.19456
NCAPH2	2.53441	2.53441	7.93263	6.72251	10.2895		NCAPH2	3.12997	2.65249	4.05993
CASP3	21.8205	21.8205	60.8362	27.7032	57.0214		CASP3	2.78803	1.26959	2.6132
C14orf106	12.1784	12.1784	22.87	23.4655	25.9885		C14orf106	1.87792	1.92682	2.13399
GUK1	15.5946	15.5946	61.2808	61.9718	48.0148		GUK1	3.92961	3.97391	3.07893
DCTPP1	9.99364	9.99364	40.849	39.7755	42.6247		DCTPP1	4.0875	3.98008	4.26518
TRIM14	0	1	0	0	0		TRIM14	0	0	0
YKT6	81.4081	81.4081	514.023	997.892	633.662		YKT6	6.31415	12.2579	7.78377
SPATS2L	5.95192	5.95192	14.066	9.84151	8.92161		SPATS2L	2.36328	1.6535	1.49895
COL28A1	9.17978	9.17978	23.6399	17.134	22.8172		COL28A1	2.57521	1.86649	2.48559
CD5L	51.6967	51.6967	244.598	90.4164	44.8997		CD5L	4.73141	1.74898	0.868522
TMEM127	22.9612	22.9612	68.7896	56.3417	52.8494		TMEM127	2.9959	2.45377	2.30168
GRK6	0	1	3.23143	0	0.982179		GRK6	3.23143	0	0.982179
FBF1	0	1	1.55918	4.90968	1.42172		FBF1	1.55918	4.90968	1.42172
DBN1	16.6408	16.6408	27.468	41.1542	27.4338		DBN1	1.65064	2.47309	1.64859
SIRT2	3.75829	3.75829	9.04525	0	10.1118		SIRT2	2.40674	0	2.69053
C10orf12	0.401938	0.401938	5.41723	6.09222	4.96785		C10orf12	13.4778	15.1571	12.3597
CD99	92.3274	92.3274	149.713	249.254	210.496		CD99	1.62154	2.69968	2.27989
NCAPD3	11.8133	11.8133	20.8561	24.1902	29.3851		NCAPD3	1.76548	2.04771	2.48746
PRRC1	3.7093	3.7093	18.8285	11.2444	20.6851		PRRC1	5.07604	3.03142	5.57657
MMP1	4.35566	4.35566	175.735	54.3122	13.0548		MMP1	40.3463	12.4694	2.9972
ST8SIA2	2.04284	2.04284	3.44161	12.3854	16.5875		ST8SIA2	1.68472	6.06284	8.11986
SIAE	120.052	120.052	104.992	207.707	171.308		SIAE	0.874551	1.73014	1.42694
TUB	1.4982	1.4982	2.16346	3.40625	1.97272		TUB	1.44405	2.27357	1.31673
GLTP	15.0317	15.0317	25.9337	36.4339	23.9747		GLTP	1.72526	2.4238	1.59494
ATAD5	2.73903	2.73903	7.50491	14.6902	6.47335		ATAD5	2.73998	5.36328	2.36337
BUB1	11.2767	11.2767	18.0112	16.7631	17.3519		BUB1	1.59721	1.48653	1.53874
EME1	2.34517	2.34517	7.90193	10.6638	14.4105		EME1	3.36944	4.54713	6.14476
MXRA5	6.35632	6.35632	16.6772	48.1516	20.1159		MXRA5	2.62371	7.57539	3.1647
DCBLD1	0.759448	0.759448	5.84895	5.75552	1.33332		DCBLD1	7.70158	7.57855	1.75564
RRM2B	2.15198	2.15198	6.43608	4.34903	10.8117		RRM2B	2.99078	2.02095	5.02407
ZBTB16	0	1	1.53006	0	0.465056		ZBTB16	1.53006	0	0.465056
LINGO2	5.40956	5.40956	10.4974	14.056	7.46214		LINGO2	1.94052	2.59836	1.37943
TNFRSF12A	0	1	7.43666	9.0066	7.26612		TNFRSF12A	7.43666	9.00661	7.26612
KIF15	7.55754	7.55754	19.6299	32.0175	35.6087		KIF15	2.59739	4.2365	4.71168
COL4A6	6.76156	6.76156	26.8542	28.2754	18.646		COL4A6	3.97159	4.18179	2.75765
PPIA	1.80268	1.80268	2.33554	0	0.532409		PPIA	1.29559	0	0.295342
SLC36A4	6.3574	6.3574	7.1403	3.27623	7.44089		SLC36A4	1.12315	0.515342	1.17043
GINS2	10.2838	10.2838	39.983	26.81	39.1599		GINS2	3.88797	2.60702	3.80793
ZP1	0	1	4.36365	0	0		ZP1	4.36365	0	0
SYNCRIP	16.8422	16.8422	59.2188	62.7964	67.7385		SYNCRIP	3.5161	3.72851	4.02196
RGS12	1.75362	1.75362	1.26615	1.32899	2.69389		RGS12	0.722023	0.757855	1.53619
C7orf62	1.68153	1.68153	4.04701	0	6.64238		C7orf62	2.40674	0	3.9502
POP5	30.7741	30.7741	42.4587	68.5531	88.8453		POP5	1.37969	2.22762	2.88701
CNST	0	1	0	0	2.02092		CNST	0	0	2.02092
SPARC	2643.66	2643.66	1259.37	947.668	670.004		SPARC	0.476373	0.358469	0.253438
POLE2	8.66853	8.66853	19.1058	23.5561	29.2198		POLE2	2.20404	2.71742	3.37079
RBM14	35.4483	35.4483	182.719	183.135	175.274		RBM14	5.15452	5.16625	4.94448
C12orf41	0	1	2.22214	0	3.03934		C12orf41	2.22214	0	3.03934
RAE1	46.3183	46.3183	96.1919	105.329	116.889		RAE1	2.07676	2.27402	2.52361
DZIP1	0.207025	0.207025	0.99651	4.39305	3.99808		DZIP1	4.81349	21.22	19.3121
PXMP4	1.28198	1.28198	6.78789	11.6587	4.50141		PXMP4	5.29483	9.09426	3.51129
LOC100132556	0	1	0	11.7443	25.5064		LOC100132556	0	11.7443	25.5064
TPX2	17.5201	17.5201	27.0192	35.7374	42.4083		TPX2	1.54218	2.03979	2.42055
ZNF828	0	1	0.395994	1.24694	1.80541		ZNF828	0.395994	1.24694	1.80541
MFSD11	2.59028	2.59028	16.078	23.7466	7.27525		MFSD11	6.20707	9.16761	2.80868
PRB3	33.3306	33.3306	238.717	343.763	213.512		PRB3	7.16208	10.3137	6.40588
BMPR2	5.29246	5.29246	18.6876	31.4225	32.2579		BMPR2	3.53098	5.93722	6.09506
ISYNA1	12.3313	12.3313	38.3637	37.3296	32.8705		ISYNA1	3.11107	3.02722	2.66561
HOXD10	0.882972	0.882972	11.0505	29.8715	7.74705		HOXD10	12.5151	33.8307	8.77384
CGREF1	6.48098	6.48098	9.29333	15.4784	17.3462		CGREF1	1.43394	2.38827	2.67647
HAUS3	2.2006	2.2006	6.20737	11.5121	7.10935		HAUS3	2.82076	5.23134	3.23064
SLC12A6	4.87603	4.87603	20.2396	21.6986	16.7541		SLC12A6	4.15084	4.45006	3.43601
BCO2	9.16677	9.16677	21.1362	15.0337	12.7187		BCO2	2.30574	1.64003	1.38748
HIST3H2BB	6.6919	6.6919	26.2158	79.8256	49.2133		HIST3H2BB	3.91754	11.9287	7.35415
PKN3	7.27813	7.27813	38.5365	60.8941	36.7362		PKN3	5.29483	8.36672	5.04748
ARL3	12.0011	12.0011	31.2068	37.2033	44.5585		ARL3	2.60034	3.1	3.71288
TMEFF1	19.8271	19.8271	20.3751	66.7692	76.1145		TMEFF1	1.02764	3.36757	3.83891
CENPI	1.18843	1.18843	1.1441	0	2.08647		CENPI	0.962697	0	1.75564
FAM83D	0.891928	0.891928	0	0	0		FAM83D	0	0	0
NSL1	0	1	2.87971	0	1.75055		NSL1	2.87971	0	1.75055
SYT6	0	1	0	0	0		SYT6	0	0	0
MSH2	18.4197	18.4197	36.2951	31.483	36.1657		MSH2	1.97046	1.70921	1.96343
FAM114A1	2.29533	2.29533	12.6269	18.8863	12.6593		FAM114A1	5.50113	8.22814	5.51523
C20orf7	1.3925	1.3925	4.10359	5.56267	2.1826		C20orf7	2.94692	3.99474	1.5674
CEP55	5.33397	5.33397	9.42201	10.596	15.041		CEP55	1.76642	1.98652	2.81985
AMMECR1	15.76	15.76	21.4178	33.385	33.1959		AMMECR1	1.359	2.11834	2.10634
LDB2	0.979332	0.979332	0.942801	5.93754	7.71993		LDB2	0.962697	6.06284	7.88284
GCLC	46.2196	46.2196	70.388	82.9806	89.5083		GCLC	1.5229	1.79536	1.93659
S1PR2	0	1	1.53561	4.83547	2.80046		S1PR2	1.53561	4.83547	2.80046
PDGFRA	28.4597	28.4597	34.0851	38.1497	60.6051		PDGFRA	1.19766	1.34048	2.1295
APPL2	1.68368	1.68368	8.20971	12.7598	9.36294		APPL2	4.87606	7.57855	5.561
P4HA1	41.0427	41.0427	45.245	86.3473	77.0604		P4HA1	1.10239	2.10384	1.87756
RBM15	12.469	12.469	38.2447	51.3353	51.4788		RBM15	3.06719	4.11705	4.12856
ZWILCH	1.28227	1.28227	7.37166	7.77417	11.9091		ZWILCH	5.74894	6.06284	9.28753
HOOK2	0.580872	0.580872	1.67761	0	1.52971		HOOK2	2.88809	0	2.63347
STAC3	0	1	3.12796	3.2832	0		STAC3	3.12796	3.2832	0
LOC389137	3.21747	3.21747	8.25985	9.75349	13.1804		LOC389137	2.56719	3.03142	4.0965
GPR1	1.66291	1.66291	7.10332	2.88056	4.78585		GPR1	4.27163	1.73224	2.878
BATF3	2.37836	2.37836	10.1018	7.18586	5.20211		BATF3	4.24738	3.02135	2.18727
CDC7	4.52077	4.52077	8.41412	15.5316	20.1067		CDC7	1.86122	3.43561	4.44763
PUS7L	1.38932	1.38932	2.67499	2.10581	3.04894		PUS7L	1.92539	1.51571	2.19456
LOC100293615	202.376	202.376	333.292	315.471	411.307		LOC100293615	1.64689	1.55884	2.03239
RGP1	0.741518	0.741518	4.28315	0	0.650921		RGP1	5.77618	0	0.877822
KIAA1704	39.1849	39.1849	57.1943	46.701	69.6217		KIAA1704	1.4596	1.19181	1.77675
DIS3L	0	1	1.96663	1.54817	1.79325		DIS3L	1.96663	1.54817	1.79325
RANBP10	0	1	0	0	1.77878		RANBP10	0	0	1.77879
SLC25A1	1.01318	1.01318	3.90154	9.21413	7.11514		SLC25A1	3.85079	9.09426	7.02258
C9	4.89598	4.89598	24.9218	8.3485	5.64086		C9	5.09026	1.70518	1.15214
PBK	6.61175	6.61175	23.7393	25.9607	30.9249		PBK	3.59048	3.92645	4.67727
GTSE1	2.59238	2.59238	11.2663	7.32981	13.519		GTSE1	4.34593	2.82744	5.21488
C11orf58	72.0576	72.0576	106.678	176.296	187.022		C11orf58	1.48045	2.44659	2.59545
FGFR1	31.0202	31.0202	55.8757	62.4377	79.9329		FGFR1	1.80127	2.01281	2.5768
KRT18	454.38	454.38	346.487	256.879	158.216		KRT18	0.76255	0.56534	0.348202
NOX3	6.48489	6.48489	51.6202	29.2665	17.9234		NOX3	7.96007	4.51304	2.76387
CMTM3	0	1	4.93273	1.41205	1.63558		CMTM3	4.93272	1.41205	1.63558
PARVA	0.304094	0.304094	3.51301	4.60919	3.73717		PARVA	11.5524	15.1571	12.2895
SLC35D1	16.2245	16.2245	51.5032	50.8486	52.2917		SLC35D1	3.17441	3.13406	3.22301
SOX5	0	1	0	1.17133	1.37032		SOX5	0	1.17133	1.37032
PTBP1	80.5486	80.5486	253.94	320.52	267.164		PTBP1	3.15263	3.97921	3.3168
CDH3	0	1	0	4.01408	0		CDH3	0	4.01408	0
PRMT3	4.18326	4.18326	9.14675	13.8972	13.5015		PRMT3	2.18651	3.32211	3.2275
MRPL36	51.8316	51.8316	94.7148	126.413	118.537		MRPL36	1.82736	2.43893	2.28696
SLC5A3	1.83791	1.83791	6.19273	4.17861	5.26762		SLC5A3	3.36944	2.27357	2.86609
HAUS4	4.32981	4.32981	10.7154	19.2882	16.5885		HAUS4	2.47479	4.45474	3.83122
LINS1	1.59449	1.59449	3.02679	8.16942	4.33704		LINS1	1.89828	5.12353	2.72001
MARCO	34.1186	34.1186	110.006	50.5719	47.6129		MARCO	3.22423	1.48224	1.39551
C1orf112	1.02439	1.02439	2.95854	3.8817	4.02857		C1orf112	2.88809	3.78928	3.93264
BMP2K	1.23865	1.23865	2.98111	1.87743	1.63097		BMP2K	2.40674	1.51571	1.31673
GAL3ST4	1.22145	1.22145	6.83187	11.1081	16.0939		GAL3ST4	5.59327	9.09426	13.1761
ILDR1	0.811292	0.811292	0	0	2.84868		ILDR1	0	0	3.51129
DGKE	1.09383	1.09383	1.05303	0	0		DGKE	0.962697	0	0
CDC25C	4.40601	4.40601	34.7816	28.1154	28.416		CDC25C	7.89412	6.38114	6.44936
DDX19B	5.01304	5.01304	32.8571	33.9432	43.0043		DDX19B	6.55431	6.77097	8.57848
CASP1	7.74724	7.74724	14.2587	13.4508	17.551		CASP1	1.84048	1.73621	2.26545
CXCL10	40.5367	40.5367	20.5044	2.08278	24.6977		CXCL10	0.505824	0.05138	0.609268
MLH1	1.88721	1.88721	4.99624	4.2907	8.30389		MLH1	2.64742	2.27357	4.40008
TIPIN	0	1	5.39654	0	4.99851		TIPIN	5.39654	0	4.99851
MLLT3	0.677187	0.677187	3.04232	6.15852	8.7186		MLLT3	4.49259	9.09426	12.8747
POLD1	1.33596	1.33596	6.42877	4.62839	10.6048		POLD1	4.81211	3.46448	7.93802
ZNF281	2.57097	2.57097	9.51086	10.5249	15.0513		ZNF281	3.69933	4.09375	5.85432
KRT8	1046.26	1046.26	507.345	268.82	340.35		KRT8	0.48491	0.256933	0.3253
C20orf85	0	1	1.87309	5.89813	0		C20orf85	1.87309	5.89813	0
PTCH1	4.27686	4.27686	4.05898	13.0475	15.0967		PTCH1	0.949055	3.05072	3.52986
CCDC112	2.51269	2.51269	6.22709	10.8814	11.5547		CCDC112	2.47826	4.3306	4.59854
C11orf31	329.388	329.388	476.661	506.989	770.807		C11orf31	1.44711	1.53919	2.34012
CRTC1	0	1	1.32149	1.38707	6.42658		CRTC1	1.32149	1.38707	6.42658
PDE3A	0	1	0	0	2.85453		PDE3A	0	0	2.85453
NCAPG2	7.98994	7.98994	19.799	21.4051	29.5605		NCAPG2	2.47799	2.679	3.69972
TMEM179B	0	1	15.555	0	6.07868		TMEM179B	15.555	0	6.07868
C1orf66	0.358078	0.358078	1.37888	1.08549	3.45762		C1orf66	3.85079	3.03142	9.65605
FAM160B2	0	1	2.67077	1.05124	0.608827		FAM160B2	2.67077	1.05124	0.608827
TSPYL4	0	1	17.9042	14.2649	11.9333		TSPYL4	17.9042	14.2649	11.9333
SLC17A5	0	1	0	0	2.2106		SLC17A5	0	0	2.2106
C9orf80	10.7336	10.7336	27.0881	29.0589	26.6337		C9orf80	2.52368	2.70729	2.48135
RAB28	3.96836	3.96836	7.39419	0	15.732		RAB28	1.86329	0	3.96436
MURC	319.812	319.812	76.7006	17.0457	14.0923		MURC	0.23983	0.053299	0.044064
LIPA	14.1554	14.1554	28.3107	32.1904	27.7906		LIPA	1.99999	2.27407	1.96325
LIMA1	14.7214	14.7214	60.8922	65.0287	42.7592		LIMA1	4.1363	4.41728	2.90455
SRD5A3	14.6971	14.6971	23.0266	34.6424	38.0632		SRD5A3	1.56674	2.35709	2.58984
RHBDL2	23.5273	23.5273	30.7284	30.869	25.3051		RHBDL2	1.30607	1.31204	1.07556
EMILIN1	3.77825	3.77825	43.9461	71.6884	40.1136		EMILIN1	11.6313	18.974	10.617
POLR2K	49.5629	49.5629	73.1425	110.663	89.7254		POLR2K	1.47575	2.23278	1.81033
EHMT2	1.1863	1.1863	2.48204	0	3.47119		EHMT2	2.09226	0	2.92607
KLHL24	2.21299	2.21299	4.47604	4.0251	1.94067		KLHL24	2.02263	1.81885	0.876945
FAM109A	0.604842	0.604842	1.74684	1.83353	3.18566		FAM109A	2.88809	3.03142	5.26694
DZIP1L	0	1	8.03767	4.21828	6.10754		DZIP1L	8.03767	4.21828	6.10754
HEATR3	1.78375	1.78375	14.3413	19.0402	16.5264		HEATR3	8.03998	10.6743	9.26502
ANGEL1	1.10761	1.10761	2.13258	3.35763	4.86141		ANGEL1	1.92539	3.03142	4.38911
FAM49B	32.6988	32.6988	58.6193	45.7833	44.2668		FAM49B	1.7927	1.40015	1.35377
YWHAZ	382.458	382.458	712.659	747.418	648.582		YWHAZ	1.86337	1.95425	1.69583
GFPT2	10.2942	10.2942	21.477	28.2063	29.103		GFPT2	2.08633	2.74004	2.82714
MDGA2	0	1	1.53376	0	1.39854		MDGA2	1.53376	0	1.39854
BRMS1	1.27826	1.27826	19.8122	30.9995	15.7092		BRMS1	15.4994	24.2514	12.2895
ZNF594	3.25738	3.25738	19.0417	18.1164	15.8162		ZNF594	5.84572	5.56166	4.8555
TATDN3	8.45616	8.45616	10.4156	18.5136	14.4336		TATDN3	1.23172	2.18936	1.70688
RPTOR	0	1	1.08127	0	0.492971		RPTOR	1.08127	0	0.492971
LRAT	5.24612	5.24612	7.8052	17.3489	8.79167		LRAT	1.48781	3.30701	1.67584
PGCP	1.22145	1.22145	1.17588	0	2.14442		PGCP	0.962697	0	1.75564
GIMAP7	48.6279	48.6279	77.2454	92.8784	100.632		GIMAP7	1.5885	1.90998	2.06944
SCD	21.4306	21.4306	35.5075	31.2743	19.0967		SCD	1.65686	1.45933	0.891094
PTK2B	0	1	6.89442	4.34195	3.77195		PTK2B	6.89442	4.34195	3.77195
SPAG1	7.78796	7.78796	22.4443	23.0456	18.6337		SPAG1	2.88192	2.95913	2.39263
RAD54L2	0	1	2.42093	4.35614	2.94333		RAD54L2	2.42093	4.35614	2.94333
ACP5	3.83312	3.83312	61.1577	104.202	82.2637		ACP5	15.9551	27.1846	21.4613
PRAM1	1.17572	1.17572	5.65932	0	3.09623		PRAM1	4.81349	0	2.63347
TAF5L	4.58337	4.58337	21.678	19.1347	15.1908		TAF5L	4.72969	4.1748	3.31433
ZBTB10	15.7983	15.7983	16.4187	17.8469	15.3757		ZBTB10	1.03927	1.12967	0.973253
MINPP1	2.58659	2.58659	1.66007	2.61368	0		MINPP1	0.641798	1.01047	0
PRSS33	0	1	0	0	0		PRSS33	0	0	0
KCTD9	4.55197	4.55197	28.2182	36.7696	21.3031		KCTD9	6.19913	8.07773	4.67996
SELI	2.17504	2.17504	10.8185	7.69237	7.00076		SELI	4.97394	3.53666	3.21868
NUAK1	14.802	14.802	18.1832	20.1146	39.6548		NUAK1	1.22843	1.35891	2.67902
TFAP2C	3.04731	3.04731	20.1662	23.8972	21.8372		TFAP2C	6.61771	7.84206	7.16603
PAIP2B	56.0464	56.0464	148.239	124.418	143.123		PAIP2B	2.64493	2.21991	2.55365
DNAJC9	29.6793	29.6793	75.6093	93.2866	112.703		DNAJC9	2.54754	3.14315	3.79736
THBS2	22.0449	22.0449	64.6042	113.944	118.973		THBS2	2.93057	5.16871	5.39684
VPS36	4.78998	4.78998	15.6784	14.5205	11.7733		VPS36	3.27317	3.03142	2.4579
GAS8	0.532994	0.532994	3.59178	0	3.74299		GAS8	6.73888	0	7.02258
FAM135A	0.171699	0.171699	2.14882	2.08196	3.38519		FAM135A	12.5151	12.1257	19.7159
CHPF	4.91389	4.91389	15.1935	22.5224	14.3357		CHPF	3.09194	4.5834	2.91737
CAMTA2	6.1643	6.1643	15.825	24.9155	9.01861		CAMTA2	2.56719	4.0419	1.46304
NUCKS1	779.249	779.249	789.901	1300.1	1003.06		NUCKS1	1.01367	1.6684	1.28722
HAS2	8.60659	8.60659	52.7809	65.2447	31.9224		HAS2	6.13262	7.58079	3.70906
OVCA2	2.15198	2.15198	5.52454	10.8726	5.66716		OVCA2	2.56719	5.05237	2.63347
FOXP2	0	1	0	0	0.352508		FOXP2	0	0	0.352508
SPNS1	0	1	5.56997	10.5235	8.12624		SPNS1	5.56997	10.5235	8.12624
MSI2	6.42335	6.42335	22.8557	55.4525	65.3754		MSI2	3.55821	8.63296	10.1778
IRAK1BP1	3.55761	3.55761	11.6275	17.2554	13.1226		IRAK1BP1	3.26836	4.85027	3.68861
TUBB2A	3.05574	3.05574	13.5026	15.7567	13.6802		TUBB2A	4.41878	5.15645	4.47689
RUNX2	2.76554	2.76554	2.66237	4.19175	6.06912		RUNX2	0.962697	1.51571	2.19456
SOX4	4.43014	4.43014	21.8636	36.7008	45.9516		SOX4	4.93518	8.28433	10.3725
ZNF226	0	1	1.59167	0	1.02932		ZNF226	1.59167	0	1.02932
LEPRE1	19.7445	19.7445	37.4993	54.8261	42.7608		LEPRE1	1.89922	2.77678	2.16571
CGN	0	1	1.47156	0	0.894545		CGN	1.47156	0	0.894545
PPARG	0.617585	0.617585	5.35092	1.87216	3.22567		PPARG	8.66427	3.03142	5.22304
SMPD3	23.1265	23.1265	16.7205	11.5923	20.6647		SMPD3	0.723002	0.501256	0.893554
TTPAL	0	1	1.23416	0	1.12535		TTPAL	1.23416	0	1.12535
FKBP14	66.9289	66.9289	131.84	147.147	141.302		FKBP14	1.96985	2.19856	2.11123
TMEM43	3.41752	3.41752	21.2536	20.7199	24.9998		TMEM43	6.21902	6.06284	7.31519
CDC6	0.708464	0.708464	3.66254	3.62238	4.98561		CDC6	5.16968	5.113	7.03721
NUF2	9.38797	9.38797	19.5303	33.049	31.3582		NUF2	2.08036	3.52036	3.34026
NDRG4	0	1	0.487412	0	1.77776		NDRG4	0.487412	0	1.77776
SERINC1	5.79242	5.79242	23.971	12.2151	9.9572		SERINC1	4.13834	2.10881	1.719
FABP3	601.362	601.362	1174.68	932.467	998.282		FABP3	1.95336	1.55059	1.66003
SLC25A13	22.317	22.317	37.1746	46.1492	55.4649		SLC25A13	1.66576	2.0679	2.48533
ENTPD6	10.6213	10.6213	13.6368	18.2453	21.755		ENTPD6	1.28392	1.71781	2.04825
PIP4K2C	2.33645	2.33645	11.6963	18.4152	8.61416		PIP4K2C	5.00603	7.8817	3.68685
CFHR2	13.683	13.683	13.1725	30.1664	26.37		CFHR2	0.962697	2.20467	1.92722
PRKCZ	2.77645	2.77645	4.34343	1.05207	3.65585		PRKCZ	1.56438	0.378928	1.31673
EFCAB2	2.43388	2.43388	7.02926	4.91874	9.6143		EFCAB2	2.88809	2.02095	3.9502
ARL8A	0	1	1.07223	5.40214	0.782161		ARL8A	1.07223	5.40214	0.782161
DUOX2	0	1	0.820057	2.75295	0		DUOX2	0.820057	2.75295	0
FUCA2	20.1419	20.1419	72.726	75.5779	86.2039		FUCA2	3.61068	3.75227	4.27982
AKT2	0.508936	0.508936	7.34926	6.17119	6.25457		AKT2	14.4405	12.1257	12.2895
C18orf21	0.872461	0.872461	4.65313	5.28959	3.81401		C18orf21	5.33334	6.06284	4.37156
HSPD1	262.086	262.086	448.835	502.353	660.353		HSPD1	1.71255	1.91675	2.51961
ZNF710	0	1	0	0	0		ZNF710	0	0	0
BAMBI	30.1678	30.1678	79.4824	90.975	88.8524		BAMBI	2.63468	3.01563	2.94527
TBX18	7.00918	7.00918	6.74502	20.9674	69.964		TBX18	0.962312	2.99142	9.98176
FAM134B	2.06441	2.06441	2.98111	6.25811	0		FAM134B	1.44405	3.03142	0
SRD5A1	34.2778	34.2778	77.7491	74.6857	56.8792		SRD5A1	2.26821	2.17883	1.65936
NAA38	217.203	217.203	257.224	326.95	503.118		NAA38	1.18425	1.50527	2.31634
WIF1	1.30287	1.30287	0	5.92434	10.2932		WIF1	0	4.54713	7.9004
ATP2C2	0.207513	0.207513	2.55908	2.51624	1.45728		ATP2C2	12.3322	12.1257	7.02258
PLK4	2.2693	2.2693	5.88006	11.6417	8.88757		PLK4	2.59114	5.1301	3.91644
SCARA3	0	1	0.719928	0	1.96937		SCARA3	0.719928	0	1.96937
NPNT	0	1	10.8543	4.8827	1.54823		NPNT	10.8543	4.8827	1.54823
IDI1	24.4096	24.4096	33.9491	65.0989	57.895		IDI1	1.39081	2.66694	2.37181
SPSB1	2.36409	2.36409	7.22598	7.16655	3.11287		SPSB1	3.05656	3.03142	1.31673
BLMH	9.39322	9.39322	43.5189	76.5454	57.2453		BLMH	4.63301	8.149	6.09432
HGFAC	2.07415	2.07415	0	12.5753	10.9244		HGFAC	0	6.06284	5.26694
MAN1A1	11.0903	11.0903	20.6536	29.5389	31.0354		MAN1A1	1.86232	2.66349	2.79843
ORC1L	2.90883	2.90883	12.8621	12.3239	16.7907		ORC1L	4.42173	4.23671	5.77231
SLC29A2	1.02499	1.02499	4.4848	1.55359	2.69927		SLC29A2	4.37546	1.51571	2.63347
HIST1H1B	14.1416	14.1416	16.8478	19.3055	30.5134		HIST1H1B	1.19136	1.36516	2.1577
CLIC4	0.652404	0.652404	4.39647	9.88856	7.44503		CLIC4	6.73888	15.1571	11.4117
CLEC4E	0	1	4.55473	1.11267	2.89981		CLEC4E	4.55473	1.11267	2.89981
ID3	10.3312	10.3312	37.9929	54.8067	61.0679		ID3	3.6775	5.30499	5.91104
RBM45	44.1565	44.1565	85.61	102.089	137.397		RBM45	1.93878	2.31197	3.11158
SNRPG	655.203	655.203	811.676	1048.5	1354.5		SNRPG	1.23881	1.60026	2.06729
LOC203510	0	1	0	0	3.91772		LOC203510	0	0	3.91772
NUP85	15.6931	15.6931	52.3988	53.5273	55.5809		NUP85	3.33898	3.41088	3.54174
TUBAL3	0	1	0	0	2.06784		TUBAL3	0	0	2.06784
CDH6	1.57324	1.57324	5.15099	25.7534	18.6935		CDH6	3.27413	16.3697	11.8822
LOC729046	0	1	5.29147	0	0		LOC729046	5.29147	0	0
C2orf28	2.41243	2.41243	7.51415	13.9614	13.0892		C2orf28	3.11476	5.78726	5.42574
DYNLL1	1678.94	1678.94	1940.36	2081.92	3484.54		DYNLL1	1.15571	1.24002	2.07545
DONSON	1.64075	1.64075	3.15909	3.31586	3.84076		DONSON	1.92539	2.02095	2.34086
LHFPL2	0.700192	0.700192	4.04443	6.36773	1.84393		LHFPL2	5.77618	9.09426	2.63347
C2orf24	0	1	1.34387	4.23167	3.67616		C2orf24	1.34387	4.23168	3.67616
IMPA1	57.7514	57.7514	80.777	76.7674	86.4785		IMPA1	1.3987	1.32927	1.49743
GSTCD	0	1	0	7.74987	2.24416		GSTCD	0	7.74987	2.24417
KATNAL1	1.06988	1.06988	3.3371	6.48651	1.87833		KATNAL1	3.11914	6.06284	1.75564
TNN	0	1	0.164298	4.10726	8.44367		TNN	0.164298	4.10726	8.44367
RPA2	54.0527	54.0527	102.439	117.168	169.307		RPA2	1.89516	2.16767	3.13225
CRLF3	4.9309	4.9309	17.8709	12.3098	10.3781		CRLF3	3.62427	2.49647	2.10471
RPL36A	6.26988	6.26988	6.12668	5.51695	5.77837		RPL36A	0.977161	0.879914	0.921608
COL5A1	121.034	121.034	97.4312	82.9947	73.5031		COL5A1	0.804988	0.685712	0.607291
MANBAL	131.436	131.436	196.526	244.771	260.912		MANBAL	1.49522	1.86228	1.98508
ADNP2	6.91111	6.91111	8.48862	13.9276	15.3212		ADNP2	1.22826	2.01525	2.2169
ARL5B	3.50974	3.50974	3.86151	9.11957	8.55178		ARL5B	1.10023	2.59836	2.43658
C1D	33.7657	33.7657	54.3019	63.7597	83.5746		C1D	1.6082	1.8883	2.47513
TBC1D12	8.05768	8.05768	13.8917	18.0675	11.9883		TBC1D12	1.72403	2.24227	1.48781
USF1	5.19007	5.19007	12.1706	18.1936	20.447		USF1	2.34498	3.50546	3.93964
C1orf216	0	1	0	0	0.731054		C1orf216	0	0	0.731054
TRIM16	0.396502	0.396502	7.25251	8.41374	4.87281		TRIM16	18.2913	21.22	12.2895
PQLC1	1.68992	1.68992	1.63918	2.58079	1.121		PQLC1	0.969972	1.52716	0.663342
SAP30BP	5.72358	5.72358	12.6971	3.77187	12.6066		SAP30BP	2.21839	0.659005	2.20257
SFMBT2	2.90724	2.90724	4.19819	2.20327	0.63801		SFMBT2	1.44405	0.757855	0.219456
HAUS1	26.1738	26.1738	30.6828	35.3996	61.5084		HAUS1	1.17227	1.35248	2.35
PSPC1	22.1908	22.1908	64.1061	74.092	86.6203		PSPC1	2.88885	3.33885	3.90342
LOC100289774	11.3594	11.3594	36.365	33.5466	27.5068		LOC100289774	3.2013	2.95319	2.4215
SNHG3-RCC1	17.4858	17.4858	84.889	123.308	130.595		SNHG3-RCC1	4.85473	7.05189	7.4686
BOD1	16.4481	16.4481	34.4407	39.0372	41.6746		BOD1	2.09391	2.37336	2.53371
SULT1C3	20.3773	20.3773	15.8187	7.68302	22.4611		SULT1C3	0.776291	0.377038	1.10226
SHKBP1	0	1	2.15429	10.1754	7.85743		SHKBP1	2.15429	10.1754	7.85743
GPR171	6.61234	6.61234	0	0	5.80446		GPR171	0	0	0.877822
RAB4B	0	1	3.05277	3.20427	2.78363		RAB4B	3.05277	3.20427	2.78363
SUB1	455.773	455.773	573.985	648.786	684.228		SUB1	1.25936	1.42348	1.50124
C4orf31	2.66378	2.66378	1.32969	1.19929	10.6524		C4orf31	0.499176	0.450222	3.99897
ACTR6	11.0843	11.0843	13.5716	15.2965	11.8182		ACTR6	1.2244	1.38001	1.06621
LUM	458.701	458.701	452.163	328.584	360.515		LUM	0.985747	0.716336	0.785947
C1orf198	0	1	6.79119	5.34617	3.61227		C1orf198	6.79119	5.34617	3.61226
C1QTNF1	62.7962	62.7962	19.1017	19.4029	33.9924		C1QTNF1	0.304185	0.308982	0.541313
NKD1	1.15412	1.15412	0.555535	0	7.01581		NKD1	0.481349	0	6.07892
C12orf23	66.1032	66.1032	141.847	125.366	171.144		C12orf23	2.14584	1.89652	2.58905
BCL6	0	1	0.540635	3.4048	1.47891		BCL6	0.540635	3.4048	1.47891
CARD6	139.27	139.27	96.7823	49.9617	37.6158		CARD6	0.694926	0.35874	0.270093
TNRC6A	4.66717	4.66717	12.3901	19.4121	14.3945		TNRC6A	2.65473	4.15929	3.08421
GLUL	18.5911	18.5911	79.7898	64.7159	53.8972		GLUL	4.29183	3.48102	2.89909
SPRED2	2.35696	2.35696	6.38025	10.2708	11.3432		SPRED2	2.70698	4.35767	4.81266
FBXO42	1.04612	1.04612	3.357	9.51372	4.28545		FBXO42	3.20899	9.09426	4.0965
IPO9	6.00409	6.00409	21.9994	21.0747	30.0614		IPO9	3.66408	3.51007	5.00682
GDI1	36.4305	36.4305	71.5184	104.025	93.5533		GDI1	1.96314	2.85545	2.56799
ANLN	4.97289	4.97289	11.2909	10.4283	10.2564		ANLN	2.27049	2.09703	2.06247
CENPF	1.58696	1.58696	5.47448	4.81075	5.56763		CENPF	3.44966	3.03142	3.50836
FKBP10	236.598	236.598	362.233	573.311	469.305		FKBP10	1.53101	2.42315	1.98355
KIF4B	20.865	20.865	47.7027	65.8322	60.3176		KIF4B	2.28626	3.15515	2.89086
LSM2	11.2112	11.2112	36.8385	47.7434	35.8398		LSM2	3.28588	4.25856	3.1968
PRKX	8.92098	8.92098	11.0147	10.3936	15.4495		PRKX	1.2347	1.16507	1.73182
PAPSS1	17.3993	17.3993	23.619	28.0592	33.1825		PAPSS1	1.35746	1.61266	1.90711
CCNJ	0	1	4.73157	20.8588	9.77934		CCNJ	4.73157	20.8588	9.77934
GNB2	70.7387	70.7387	129.473	164.212	136.533		GNB2	1.8303	2.32139	1.93011
DHX33	2.89171	2.89171	13.0388	8.21263	9.21759		DHX33	4.50903	2.84006	3.18759
CSTF1	20.7749	20.7749	60.3117	80.1349	95.877		CSTF1	2.9031	3.85729	4.61504
CENPH	44.0619	44.0619	44.911	55.8365	81.1309		CENPH	1.01927	1.26723	1.84129
PFKFB4	1.89127	1.89127	22.3038	30.0995	15.8217		PFKFB4	11.793	15.915	8.36565
ZCCHC2	3.58468	3.58468	6.90192	7.24444	8.89819		ZCCHC2	1.92539	2.02095	2.48229
ANP32E	204.682	204.682	794.788	941.017	829.221		ANP32E	3.88304	4.59746	4.05127
ACPP	0.939573	0.939573	0	0	0		ACPP	0	0	0
ZKSCAN4	0	1	0	0	5.77839		ZKSCAN4	0	0	5.77839
RDH5	0	1	2.55382	0	1.81219		RDH5	2.55382	0	1.81219
TRIP13	9.37841	9.37841	37.4792	47.3358	48.0823		TRIP13	3.99633	5.04732	5.12692
LYZ	245.736	245.736	835.38	376.926	262.588		LYZ	3.3995	1.53387	1.06858
SNRPD2	939.984	939.984	1536.31	1694.98	1846.68		SNRPD2	1.6344	1.8032	1.96458
PNPT1	12.4993	12.4993	25.9452	28.7581	38.9316		PNPT1	2.07572	2.30077	3.11469
LAMA1	1.41731	1.41731	5.7381	10.9078	14.8707		LAMA1	4.04858	7.69613	10.4922
RACGAP1	1.79794	1.79794	8.42529	7.72297	9.07948		RACGAP1	4.68609	4.29546	5.04995
KIF18A	0.905842	0.905842	8.32612	16.5587	10.7847		KIF18A	9.19158	18.2799	11.9057
FUS	315.836	315.836	1123.67	1230.42	1010.26		FUS	3.55777	3.89577	3.19868
C1orf85	21.9767	21.9767	124.525	125.281	95.7292		C1orf85	5.66621	5.70064	4.35593
GLT25D2	15.3151	15.3151	17.509	34.4973	34.3701		GLT25D2	1.14325	2.25251	2.24419
LOC100131203	1.97846	1.97846	2.69872	0	1.634		LOC100131203	1.36405	0	0.825895
H2AFY2	304.303	304.303	400.626	544.656	619.16		H2AFY2	1.31654	1.78985	2.03469
RRM1	64.7237	64.7237	145.776	176.081	211.29		RRM1	2.25228	2.7205	3.26449
LOC100291910	24.1164	24.1164	35.1788	26.071	69.0233		LOC100291910	1.45871	1.08105	2.86209
PDE3B	0	1	1.19244	0	0		PDE3B	1.19244	0	0
CTPS	36.6039	36.6039	82.4053	101.759	136.577		CTPS	2.25127	2.78	3.7312
RSU1	27.043	27.043	61.4924	99.5877	62.1023		RSU1	2.27387	3.68256	2.29643
FUT6	0	1	0	0	0		FUT6	0	0	0
CDK2	0	1	5.00243	4.29993	3.68979		CDK2	5.00243	4.29993	3.68979
MLKL	2.71992	2.71992	7.41897	1.3742	9.15249		MLKL	2.72764	0.505237	3.36499
HAPLN3	11.6947	11.6947	17.6041	16.7589	17.3792		HAPLN3	1.50531	1.43304	1.48607
RAB11A	55.7231	55.7231	99.4122	107.194	87.1634		RAB11A	1.78404	1.92369	1.56422
LRRC15	0	1	2.82777	3.56173	1.28923		LRRC15	2.82777	3.56173	1.28923
FGF2	4.05039	4.05039	15.3584	12.2784	14.6665		FGF2	3.79182	3.03142	3.62102
JOSD1	1.25994	1.25994	13.3606	7.63884	12.7357		JOSD1	10.6041	6.06284	10.1081
CRYBA1	0	1	0	0	0		CRYBA1	0	0	0
HDAC8	25.9378	25.9378	28.0492	38.5782	31.4706		HDAC8	1.0814	1.48733	1.21331
TCTN3	2.16967	2.16967	7.6587	4.38479	6.97714		TCTN3	3.52989	2.02095	3.21576
ARL6IP1	437.906	437.906	668.534	618.513	581.326		ARL6IP1	1.52666	1.41243	1.32751
C10orf137	0.267796	0.267796	2.32025	2.4354	1.88062		C10orf137	8.66427	9.09426	7.02258
TEX264	0	1	3.97481	4.67272	4.22844		TEX264	3.97481	4.67272	4.22844
RHOG	0.496298	0.496298	8.12234	6.01796	8.27757		RHOG	16.3658	12.1257	16.6786
HMMR	0.250125	0.250125	4.33672	3.79118	6.3674		HMMR	17.3382	15.1571	25.4568
NAIP	0.731242	0.731242	3.05051	2.2167	0.855868		NAIP	4.17169	3.03142	1.17043
ACAN	6.81206	6.81206	21.8018	6.3086	10.9313		ACAN	3.20046	0.926093	1.6047
NUDT21	82.9667	82.9667	212.738	319.216	226.361		NUDT21	2.56414	3.84752	2.72834
CREB5	1.87714	1.87714	0	0	0		CREB5	0	0	0
LOC100292787	170.198	170.198	90.4744	241.125	458.951		LOC100292787	0.531582	1.41673	2.69656
ANKS1A	0	1	0	0	0.391477		ANKS1A	0	0	0.391477
LOC100292901	0	1	2.26373	7.12822	0		LOC100292901	2.26373	7.12822	0
SPC25	15.9228	15.9228	32.2199	22.8993	25.7271		SPC25	2.02351	1.43815	1.61574
PDS5A	11.54	11.54	19.7306	22.9364	23.5363		PDS5A	1.70975	1.98755	2.03954
TRPS1	2.63306	2.63306	8.608	12.6771	19.7145		TRPS1	3.26921	4.81461	7.48731
HIGD1C	25.594	25.594	75.1272	81.3621	74.7626		HIGD1C	2.93535	3.17895	2.9211
TAF15	393.28	393.28	528.358	801.313	869.07		TAF15	1.34347	2.03751	2.2098
SH2D1A	0.583055	0.583055	0	3.68226	2.13258		SH2D1A	0	6.31546	3.65759
PRG4	1.77766	1.77766	48.304	7.80783	3.21531		PRG4	27.1728	4.3922	1.80873
DIRC2	1.34471	1.34471	3.45213	6.79397	9.4394		DIRC2	2.56719	5.05237	7.01965
ELF2	14.9805	14.9805	21.1559	24.5782	20.587		ELF2	1.41223	1.64068	1.37425
HMGB2	1235.61	1235.61	2313.18	2693.16	3451.7		HMGB2	1.87209	2.17961	2.79351
LARP4	3.59327	3.59327	22.7023	17.6912	12.0493		LARP4	6.318	4.92342	3.3533
HNRNPR	248.331	248.331	273.531	410.483	431.783		HNRNPR	1.10148	1.65296	1.73874
LARP7	19.5939	19.5939	45.1712	39.4057	48.3552		LARP7	2.30537	2.01112	2.46787
DAPK2	0	1	2.92447	4.60441	2.66664		DAPK2	2.92447	4.60441	2.66664
RBM15B	12.7408	12.7408	29.563	21.7872	27.7051		RBM15B	2.32035	1.71003	2.17452
CTDSPL2	34.5175	34.5175	41.9053	53.8971	61.7478		CTDSPL2	1.21403	1.56144	1.78888
PDE9A	0	1	0.896859	0	2.38794		PDE9A	0.896859	0	2.38794
MCPH1	2.68668	2.68668	4.04178	9.23039	5.97626		MCPH1	1.50438	3.43561	2.2244
FAM55B	4.38688	4.38688	9.6886	13.2985	9.96704		FAM55B	2.20854	3.03142	2.27201
CYP4F3	1.30095	1.30095	0	0	0		CYP4F3	0	0	0
NUP133	31.0035	31.0035	93.074	146.827	127.63		NUP133	3.00205	4.73581	4.11662
FAM26F	5.20996	5.20996	6.22939	6.31743	6.3662		FAM26F	1.19567	1.21257	1.22193
IGSF6	3.84035	3.84035	23.4149	13.582	5.05672		IGSF6	6.09708	3.53666	1.31673
MXD3	0	1	0	0	0		MXD3	0	0	0
CRKL	1.5046	1.5046	13.3984	7.9819	8.58503		CRKL	8.90495	5.30499	5.70585
FAHD1	3.54042	3.54042	4.77169	8.58601	8.70201		FAHD1	1.34778	2.42514	2.4579
DHX15	31.1176	31.1176	87.5401	119.237	108.965		DHX15	2.8132	3.83181	3.50172
GPT2	1.44667	1.44667	3.63434	5.05737	11.0966		GPT2	2.51221	3.49587	7.67046
IYD	8.30263	8.30263	7.6855	1.93606	8.09555		IYD	0.92567	0.233186	0.975058
C12orf26	0	1	1.19581	0	3.27116		C12orf26	1.19581	0	3.27115
ZC3H10	3.4788	3.4788	20.898	11.8112	8.25617		ZC3H10	6.00723	3.39519	2.37328
SEPN1	0	1	4.15983	4.94093	8.83779		SEPN1	4.15983	4.94093	8.83779
ID1	10.3954	10.3954	15.8243	13.2965	13.4762		ID1	1.52224	1.27908	1.29636
PIP5K1A	1.3924	1.3924	10.4556	13.5071	8.07194		PIP5K1A	7.50904	9.70055	5.79714
C6orf115	271.505	271.505	319.342	329.516	468.374		C6orf115	1.17619	1.21366	1.7251
DENND2D	10.5178	10.5178	5.28639	5.12191	4.13435		DENND2D	0.502613	0.486975	0.393081
FGFBP1	57.006	57.006	66.311	82.5856	48.5074		FGFBP1	1.16323	1.44872	0.850918
MBTPS2	3.07282	3.07282	11.537	11.178	18.6255		MBTPS2	3.75452	3.63771	6.06136
TBX2	3.69112	3.69112	1.6579	1.74018	2.77151		TBX2	0.449159	0.47145	0.750859
USP53	0.795154	0.795154	3.06197	0	2.09401		USP53	3.85079	0	2.63347
PRIM1	15.2379	15.2379	30.614	26.0975	30.8099		PRIM1	2.00907	1.71267	2.02193
PUS10	5.30111	5.30111	14.8965	19.8952	16.0029		PUS10	2.81008	3.75303	3.01878
RBM4	35.8627	35.8627	147.943	166.016	176.467		RBM4	4.12526	4.62921	4.92064
DNAJC5G	0	1	2.71469	5.53831	2.10181		DNAJC5G	2.71469	5.53831	2.10181
PHOSPHO2	6.23717	6.23717	17.9775	18.9075	15.2592		PHOSPHO2	2.88232	3.03142	2.44649
BUD31	73.2767	73.2767	100.596	163.418	150.869		BUD31	1.37282	2.23014	2.0589
DOK4	0	1	4.40446	6.16406	4.46239		DOK4	4.40446	6.16406	4.46239
CYP26A1	1.15792	1.15792	0.507201	0.877536	0.508224		CYP26A1	0.438027	0.757855	0.438911
ATF3	0	1	0	0	0		ATF3	0	0	0
CSE1L	26.0156	26.0156	79.934	101.916	135.251		CSE1L	3.07254	3.9175	5.19884
DCLRE1C	1.80894	1.80894	2.19052	1.72442	8.98827		DCLRE1C	1.21094	0.953277	4.96881
LYAR	36.764	36.764	66.6531	88.6018	78.4058		LYAR	1.813	2.41002	2.13268
SFRS5	99.7186	99.7186	204.011	170.773	168.926		SFRS5	2.04587	1.71255	1.69403
RELL1	2.72273	2.72273	9.18062	14.444	14.9379		RELL1	3.37185	5.30499	5.48639
PHLDB2	0	1	0	0	0.681972		PHLDB2	0	0	0.681972
C6orf182	5.77753	5.77753	16.6701	0	18.1389		C6orf182	2.88534	0	3.13957
XYLT1	12.9717	12.9717	7.92416	5.03062	10.2553		XYLT1	0.610878	0.387814	0.79059
KIAA2013	15.8324	15.8324	47.8127	50.3263	34.5589		KIAA2013	3.01994	3.1787	2.1828
LTBP1	17.7031	17.7031	32.3946	52.3281	53.8968		LTBP1	1.82988	2.95587	3.04448
TMEM161A	0	1	2.35503	3.70787	1.61055		TMEM161A	2.35503	3.70786	1.61055
LOC100294033	45.9914	45.9914	62.1221	76.7181	50.6933		LOC100294033	1.35073	1.6681	1.10223
PLA2G4F	0.771439	0.771439	1.48532	0	0		PLA2G4F	1.92539	0	0
H1FX	69.923	69.923	68.872	91.8295	87.3366		H1FX	0.984969	1.31329	1.24904
TCFL5	0	1	0	0	0.549852		TCFL5	0	0	0.549852
RBM33	0.241605	0.241605	4.06803	2.92962	3.60758		RBM33	16.8376	12.1257	14.9318
SLC11A2	0.873038	0.873038	5.92532	2.64655	3.06549		SLC11A2	6.78702	3.03142	3.51129
NADSYN1	0	1	141.106	74.0543	42.8885		NADSYN1	141.106	74.0543	42.8885
TMEM80	0	1	1.05042	0	0		TMEM80	1.05042	0	0
C5orf43	50.1059	50.1059	84.2438	80.5586	93.0284		C5orf43	1.68131	1.60777	1.85664
RALBP1	9.37736	9.37736	21.9991	12.4679	21.3059		RALBP1	2.34598	1.32957	2.27206
ITFG3	0	1	4.86064	4.17425	4.43211		ITFG3	4.86064	4.17425	4.43211
CENPM	1.6826	1.6826	14.5785	25.4524	14.2779		CENPM	8.66427	15.1268	8.48562
TRA2B	151.375	151.375	357.846	384.168	498.292		TRA2B	2.36397	2.53786	3.29177
MCM3	35.8022	35.8022	115.441	121.263	123.914		MCM3	3.22442	3.38702	3.46105
CHDH	0	1	1.5132	0	2.41463		CHDH	1.5132	0	2.41463
SLC22A5	0.612424	0.612424	4.12705	7.42606	3.7632		SLC22A5	6.73888	12.1257	6.14476
TWF1	14.4258	14.4258	31.998	30.4009	35.5046		TWF1	2.21811	2.1074	2.46119
RASA2	0.504845	0.504845	2.43007	0	2.65899		RASA2	4.81349	0	5.26694
RELB	6.38598	6.38598	5.26951	2.76551	4.37249		RELB	0.825169	0.43306	0.684701
HIST2H2AA4	52.7515	52.7515	111.272	218.989	103.759		HIST2H2AA4	2.10936	4.15134	1.96695
BCAR1	0	1	2.08531	0	0.475365		BCAR1	2.08531	0	0.475365
ELMOD2	7.91949	7.91949	8.54985	14.8617	17.2142		ELMOD2	1.0796	1.87659	2.17366
VAMP2	0	1	0	4.62839	1.34027		VAMP2	0	4.62839	1.34027
OR1J4	0	1	0	0	0		OR1J4	0	0	0
NCBP2	60.3933	60.3933	131.561	212.398	186.905		NCBP2	2.1784	3.51692	3.0948
USP10	30.5589	30.5589	64.3194	62.6403	53.5085		USP10	2.10477	2.04982	1.751
MYLK	1.96743	1.96743	18.0954	21.2057	16.0232		MYLK	9.1975	10.7784	8.14424
COL6A3	60.8819	60.8819	48.5258	34.8003	40.1098		COL6A3	0.797048	0.571603	0.658813
HMOX1	10.2546	10.2546	111.71	26.3354	26.4067		HMOX1	10.8936	2.56816	2.57512
BRF2	0	1	2.08788	6.57449	2.85571		BRF2	2.08788	6.57449	2.85571
B4GALT7	5.75739	5.75739	27.0203	30.5429	24.1011		B4GALT7	4.69315	5.30499	4.18612
CYB5R4	0	1	2.17086	0	2.63929		CYB5R4	2.17086	0	2.63929
CSTB	2321.12	2321.12	2495.34	3410.2	2341.29		CSTB	1.07506	1.4692	1.00869
SP110	0.642866	0.642866	2.47554	1.9488	0		SP110	3.85079	3.03142	0
SOX8	0.710372	0.710372	0	0	0.62358		SOX8	0	0	0.877822
ARHGEF12	0.143559	0.143559	4.02311	6.96299	5.17182		ARHGEF12	28.0241	48.5027	36.0258
PCK2	21.3846	21.3846	65.3688	183.543	150.126		PCK2	3.05682	8.58298	7.02031
POU2F1	0.361612	0.361612	5.55604	4.38479	3.17431		POU2F1	15.3646	12.1257	8.77822
UBE2D1	119.49	119.49	150.135	176.622	181.951		UBE2D1	1.25647	1.47813	1.52274
SLC30A7	35.3576	35.3576	82.6654	81.9141	74.6467		SLC30A7	2.33798	2.31673	2.11119
PREX2	0	1	0.707297	0	2.25729		PREX2	0.707297	0	2.25729
COL7A1	12.5272	12.5272	22.5944	22.3388	15.1381		COL7A1	1.80362	1.78323	1.20842
TGDS	0	1	2.04008	3.21199	0		TGDS	2.04008	3.21199	0
TRIM62	1.72131	1.72131	2.32793	0.662185	2.28952		TRIM62	1.35242	0.384698	1.3301
FADS2	0	1	0.862154	0	0		FADS2	0.862154	0	0
NECAP2	1.01201	1.01201	10.2152	4.60176	4.44184		NECAP2	10.0939	4.54713	4.38911
AOC2	0	1	2.41896	1.90425	0		AOC2	2.41896	1.90425	0
PLEKHA1	0.836766	0.836766	6.04164	6.34147	7.34532		PLEKHA1	7.22023	7.57855	8.77822
LBH	103.689	103.689	141.109	196.391	150.86		LBH	1.36088	1.89403	1.45492
LMNB1	7.10208	7.10208	29.8569	35.6773	29.1038		LMNB1	4.20396	5.0235	4.09793
FABP4	2.15549	2.15549	5.18771	13.0684	3.78428		FABP4	2.40674	6.06284	1.75564
PSMB5	351.079	351.079	1153.5	1146.66	786.357		PSMB5	3.28559	3.26609	2.23983
CRIP2	5.6532	5.6532	3.78596	1.49019	4.09946		CRIP2	0.669702	0.263602	0.725158
EDEM3	0.472107	0.472107	7.72098	6.06523	7.91802		EDEM3	16.3543	12.8472	16.7717
SPATA5	1.11888	1.11888	5.92429	8.4795	3.84032		SPATA5	5.29483	7.57855	3.43229
SGSM3	0	1	1.11107	0	1.51967		SGSM3	1.11107	0	1.51967
SERPINE2	103.921	103.921	131.405	158.863	160.002		SERPINE2	1.26447	1.52868	1.53965
RHPN2	1.10217	1.10217	2.21054	5.15093	1.51173		RHPN2	2.00562	4.67344	1.3716
HNRNPD	418.198	418.198	502.905	645.715	742.297		HNRNPD	1.20255	1.54404	1.77499
RAP2A	4.26071	4.26071	10.2562	13.4192	15.4496		RAP2A	2.40716	3.14953	3.62605
BBS4	1.33451	1.33451	0	8.09091	1.75719		BBS4	0	6.06284	1.31673
ACOT7	16.6	16.6	26.0646	15.9161	28.0567		ACOT7	1.57016	0.958805	1.69017
CDK8	5.33459	5.33459	31.7898	29.0426	39.3271		CDK8	5.95919	5.44421	7.3721
ZNF317	0	1	0.449382	2.47634	1.43417		ZNF317	0.449382	2.47634	1.43417
JAM2	11.2608	11.2608	6.45487	25.3426	42.4899		JAM2	0.573217	2.25052	3.77326
NEK3	0	1	1.24505	0	3.40585		NEK3	1.24505	0	3.40585
BOD1L	0.677535	0.677535	3.58744	5.13474	3.56853		BOD1L	5.29483	7.57855	5.26694
SMC4	26.668	26.668	53.7659	59.3373	69.7486		SMC4	2.01612	2.22504	2.61545
IGF2BP2	101.513	101.513	52.0339	65.3922	40.6953		IGF2BP2	0.512584	0.644175	0.400887
FCN3	0	1	0	0	0		FCN3	0	0	0
MMP8	4.26561	4.26561	161.345	38.0414	10.2821		MMP8	37.8245	8.91818	2.41047
MRM1	8.37062	8.37062	49.9299	30.4817	45.9414		MRM1	5.9649	3.64151	5.48841
CCNC	34.1192	34.1192	69.9693	78.4223	90.3463		CCNC	2.05073	2.29848	2.64796
DGCR8	0.593682	0.593682	0.762048	1.1998	1.38973		DGCR8	1.2836	2.02095	2.34086
C16orf35	3.94958	3.94958	2.53484	3.99095	0		C16orf35	0.641798	1.01047	0
VASP	27.5614	27.5614	96.3748	78.3538	52.5401		VASP	3.49673	2.84288	1.90629
TBX5	18.5243	18.5243	14.3486	26.7408	40.4041		TBX5	0.774586	1.44356	2.18114
SLC31A2	0.718497	0.718497	5.53356	4.3997	1.89214		SLC31A2	7.70158	6.12347	2.63347
LOC441617	0	1	0.39415	1.24113	0.718801		LOC441617	0.39415	1.24113	0.718801
GAP43	5.39202	5.39202	3.28794	9.63598	17.7186		GAP43	0.609778	1.78708	3.28608
SULT2A1	3.08276	3.08276	3.66289	5.85188	1.76699		SULT2A1	1.18819	1.89826	0.573186
LRPAP1	32.7812	32.7812	51.6037	42.7331	61.454		LRPAP1	1.57418	1.30359	1.87467
NCAPD2	7.7319	7.7319	17.8921	22.3511	18.1168		NCAPD2	2.31406	2.89076	2.34312
PSEN2	11.7181	11.7181	21.8163	14.1243	16.2016		PSEN2	1.86176	1.20534	1.38261
GALNT13	26.8965	26.8965	60.6722	80.9289	93.8305		GALNT13	2.25577	3.0089	3.48858
SBNO1	6.14628	6.14628	12.7992	18.57	16.137		SBNO1	2.08243	3.02134	2.62549
EMILIN3	4.14342	4.14342	0.997214	0	3.63719		EMILIN3	0.240674	0	0.877822
MAPK6	20.5922	20.5922	96.5643	138.258	118.29		MAPK6	4.68935	6.71406	5.7444
RBMX	67.4581	67.4581	226.719	245.669	238.492		RBMX	3.36088	3.6418	3.5354
TMLHE	0.363706	0.363706	0	0	0.957807		TMLHE	0	0	2.63347
DOCK5	0	1	0.363675	0	0		DOCK5	0.363675	0	0
CECR5	0.990175	0.990175	10.7024	8.35723	9.4321		CECR5	10.8086	8.44015	9.5257
TAF1A	6.305	6.305	14.4592	18.4059	19.1792		TAF1A	2.2933	2.91926	3.0419
RAB1A	793.212	793.212	1162.55	1060.57	871.123		RAB1A	1.46562	1.33706	1.09822
YIPF6	1.12174	1.12174	7.55924	3.40045	9.84685		YIPF6	6.73888	3.03142	8.77822
STARD13	0	1	0	3.31586	0		STARD13	0	3.31586	0
ABCB4	0	1	4.63064	9.72089	4.57425		ABCB4	4.63064	9.72089	4.57425
GALNT3	4.80897	4.80897	4.05089	10.0133	2.9418		GALNT3	0.84236	2.08221	0.611732
ZMYM6	0	1	2.00114	0	0		ZMYM6	2.00114	0	0
CDCA7	2.72981	2.72981	13.9569	19.4294	29.563		CDCA7	5.11276	7.11749	10.8297
TAF5	4.71369	4.71369	21.0838	27.2175	24.7696		TAF5	4.47288	5.77414	5.25481
COL13A1	4.95577	4.95577	16.9517	22.9672	13.3597		COL13A1	3.42059	4.63443	2.69579
RBM47	13.4121	13.4121	23.1032	27.6039	19.8705		RBM47	1.72257	2.05814	1.48154
LOC390940	42.1033	42.1033	44.4543	79.0891	72.5255		LOC390940	1.05584	1.87845	1.72256
DCAKD	0	1	2.65403	4.17861	3.02505		DCAKD	2.65403	4.17861	3.02505
SNAP29	0.54522	0.54522	2.19138	0	0		SNAP29	4.01926	0	0
AACS	2.83691	2.83691	3.2773	1.71997	2.4903		AACS	1.15524	0.606284	0.877822
SATB1	12.6514	12.6514	7.2469	7.32642	10.4392		SATB1	0.572815	0.579101	0.825147
FKBP4	63.6581	63.6581	120.336	102.825	93.3508		FKBP4	1.89035	1.61527	1.46644
RAD9A	1.79478	1.79478	13.3907	16.3222	14.1795		RAD9A	7.4609	9.09426	7.9004
UBLCP1	0.160775	0.160775	2.63122	2.43689	1.69359		UBLCP1	16.3658	15.1571	10.5339
GTF2H2B	12.2974	12.2974	30.5822	26.1735	41.6096		GTF2H2B	2.48689	2.12838	3.38362
MFAP2	87.6037	87.6037	198.266	372.117	290.399		MFAP2	2.26322	4.24774	3.31491
ETNK1	3.5306	3.5306	6.47954	6.34381	4.50799		ETNK1	1.83525	1.79681	1.27683
UPP1	8.02601	8.02601	6.31255	13.4789	11.0761		UPP1	0.786512	1.6794	1.38002
SRPK3	0	1	2.41207	3.79766	6.59823		SRPK3	2.41207	3.79766	6.59823
H3F3A	400.436	400.436	413.814	523.931	607.285		H3F3A	1.03341	1.3084	1.51656
DCAF15	0.362806	0.362806	5.58835	2.19963	5.09566		DCAF15	15.4032	6.06284	14.0452
TXNDC12	72.134	72.134	100.491	114.838	154.162		TXNDC12	1.39312	1.59201	2.13716
MCM5	11.0397	11.0397	51.4799	71.5658	48.8437		MCM5	4.66316	6.48258	4.42436
CETN2	40.6954	40.6954	45.9836	52.855	58.1085		CETN2	1.12995	1.2988	1.42789
TCF3	5.14594	5.14594	21.6216	34.3189	23.0378		TCF3	4.20169	6.66913	4.47689
WRN	8.55983	8.55983	18.0659	10.3432	22.8453		WRN	2.11055	1.20834	2.6689
COL1A1	6731.91	6731.91	1919.24	1450.61	1087.46		COL1A1	0.285096	0.215482	0.161538
EPHA5	3.59689	3.59689	0.86568	0	3.15743		EPHA5	0.240674	0	0.877822
CKAP2L	1.71766	1.71766	5.78754	5.20694	2.2617		CKAP2L	3.36944	3.03142	1.31673
RANBP1	114.183	114.183	253.489	290.179	350.386		RANBP1	2.22003	2.54135	3.06864
LZTS2	2.61427	2.61427	5.53685	9.50995	7.44454		LZTS2	2.11793	3.63771	2.84766
FLJ36031	12.048	12.048	33.7007	37.3052	44.4199		FLJ36031	2.79719	3.09637	3.6869
TMEM150A	7.6197	7.6197	22.0064	21.1736	18.238		TMEM150A	2.88809	2.7788	2.39353
SCAI	0.590757	0.590757	1.13744	4.17861	1.50042		SCAI	1.92539	7.07332	2.53983
HTR3B	2.2425	2.2425	3.12078	5.01996	3.72431		HTR3B	1.39165	2.23855	1.66078
DNAL4	0	1	0.893075	0	0		DNAL4	0.893075	0	0
ATAD2	7.3621	7.3621	29.8218	30.8012	26.4818		ATAD2	4.05072	4.18375	3.59705
NOV	12.5299	12.5299	27.5142	17.4299	12.4084		NOV	2.19588	1.39106	0.990303
C10orf57	25.1055	25.1055	23.5213	18.5422	11.9378		C10orf57	0.936897	0.73857	0.475507
MCM6	13.9954	13.9954	73.9854	86.5709	91.3963		MCM6	5.28642	6.18568	6.53047
SH2B3	0	1	1.06095	0	3.86964		SH2B3	1.06095	0	3.86964
PCF11	5.61494	5.61494	10.4765	7.4468	11.9988		PCF11	1.86583	1.32625	2.13695
CHAC1	1.22999	1.22999	5.32847	14.9144	36.2459		CHAC1	4.33214	12.1257	29.4685
FMN1	0	1	1.23777	0	0		FMN1	1.23777	0	0
BCL7A	0	1	2.97065	10.4767	12.1894		BCL7A	2.97065	10.4767	12.1894
CFB	0.41918	0.41918	7.66532	0.635356	0.919915		CFB	18.2864	1.51571	2.19456
SMURF1	7.32867	7.32867	18.6965	22.2903	5.33962		SMURF1	2.55115	3.04153	0.728593
ZNF143	2.21609	2.21609	3.36634	3.97508	5.45229		ZNF143	1.51905	1.79374	2.46033
CYTSA	0	1	0	0	0		CYTSA	0	0	0
GINS3	31.9726	31.9726	60.4386	70.6659	72.1479		GINS3	1.89033	2.2102	2.25656
EMX2	33.752	33.752	80.5819	99.1253	77.3339		EMX2	2.38747	2.93688	2.29124
SFRS9	730.979	730.979	892.018	943.321	987.583		SFRS9	1.22031	1.29049	1.35104
ASPHD2	1.44407	1.44407	6.36019	2.1888	3.1691		ASPHD2	4.40434	1.51571	2.19456
CYP3A4	0	1	1.94182	0	0.885313		CYP3A4	1.94182	0	0.885313
PTAFR	0	1	0	0	0		PTAFR	0	0	0
BNIP3L	1.02979	1.02979	10.9051	3.12173	4.51986		BNIP3L	10.5897	3.03142	4.38911
EXOSC6	33.3773	33.3773	106.51	156.839	124.987		EXOSC6	3.19108	4.69896	3.74468
FURIN	0.701681	0.701681	1.12584	5.67224	1.43722		FURIN	1.6045	8.08379	2.04825
ETF1	80.7286	80.7286	336.15	438.812	322.764		ETF1	4.16395	5.43565	3.99814
IRF6	0.464821	0.464821	0	0	0.40803		IRF6	0	0	0.877822
TWIST2	1.50589	1.50589	9.43041	2.2825	10.5752		TWIST2	6.26235	1.51571	7.02258
GNB4	24.8781	24.8781	40.743	46.9649	51.5178		GNB4	1.63771	1.8878	2.07081
MOXD1	15.8724	15.8724	31.625	21.581	37.0319		MOXD1	1.99246	1.35966	2.33311
FMNL3	0	1	0	1.86953	1.62411		FMNL3	0	1.86953	1.62411
ANG	271.073	271.073	557.653	389.933	185.862		ANG	2.05721	1.43848	0.685652
SPTBN2	5.0988	5.0988	25.9213	25.8929	19.2586		SPTBN2	5.08381	5.07824	3.77709
PLOD1	11.3989	11.3989	32.2934	39.5271	43.2986		PLOD1	2.83304	3.46764	3.7985
LSM3	55.6024	55.6024	95.2691	101.415	152.748		LSM3	1.7134	1.82394	2.74714
SNRPF	1990.18	1990.18	1462.5	1449.77	2728.47		SNRPF	0.734859	0.728462	1.37096
C10orf54	3.1736	3.1736	26.1221	14.9653	7.11942		C10orf54	8.23106	4.71554	2.24332
MTA3	11.8951	11.8951	15.5988	28.9194	19.9898		MTA3	1.31136	2.43119	1.6805
RIPK2	9.77755	9.77755	15.2699	11.2272	12.4134		RIPK2	1.56173	1.14827	1.26958
TARDBP	197.256	197.256	480.51	514.821	592.044		TARDBP	2.43598	2.60991	3.0014
HEATR6	2.098	2.098	6.71177	10.0669	7.16434		HEATR6	3.19913	4.79834	3.41484
SMEK1	7.18365	7.18365	30.8323	35.9363	31.8678		SMEK1	4.29201	5.00252	4.43615
NCAM1	27.0825	27.0825	23.5258	51.6549	61.8292		NCAM1	0.868673	1.90732	2.28299
UPK1B	1145.17	1145.17	1349.9	1138.66	1118.22		UPK1B	1.17878	0.994312	0.976461
CLASP1	0.604565	0.604565	1.74604	3.66538	3.3611		CLASP1	2.88809	6.06284	5.55954
PRDM1	2.94755	2.94755	23.1574	15.852	8.248		PRDM1	7.85649	5.37802	2.79826
ZSWIM4	0	1	0	0	2.19316		ZSWIM4	0	0	2.19316
TNRC18	14.2178	14.2178	38.8906	46.2395	40.9796		TNRC18	2.73534	3.25222	2.88227
WNT5A	2.08539	2.08539	11.6613	12.6434	19.2684		WNT5A	5.5919	6.06284	9.23971
KCTD15	0.593415	0.593415	5.14151	12.5922	10.4183		KCTD15	8.66427	21.22	17.5565
PLIN2	30.8324	30.8324	125.08	108.824	108.862		PLIN2	4.05676	3.52953	3.53075
WHSC1	3.25528	3.25528	10.7506	11.6163	12.5852		WHSC1	3.3025	3.56843	3.86607
LOC100290309	0.692473	0.692473	18.7046	18.4728	14.7299		LOC100290309	27.0114	26.6765	21.2714
DHCR7	68.5776	68.5776	121.581	185.445	179.957		DHCR7	1.7729	2.70417	2.62414
CMTM6	1.88806	1.88806	17.3393	7.53095	8.17789		CMTM6	9.18362	3.98871	4.33136
COTL1	13.6477	13.6477	45.0457	32.4762	23.9083		COTL1	3.3006	2.37961	1.75182
DNAJC5	1.27087	1.27087	9.38598	9.4965	8.32607		DNAJC5	7.38549	7.47245	6.55148
ELF4	0	1	13.417	11.2964	7.40099		ELF4	13.417	11.2964	7.40099
SOCS5	2.41273	2.41273	6.67785	9.14251	9.8114		SOCS5	2.76776	3.78928	4.06651
POMP	106.937	106.937	182.701	208.181	255.356		POMP	1.70849	1.94676	2.38791
CHMP1B	73.4043	73.4043	111.479	134.099	133.058		CHMP1B	1.5187	1.82685	1.81268
LRFN4	0	1	4.9223	0	0		LRFN4	4.9223	0	0
RAB20	5.3494	5.3494	29.7146	16.2163	19.7224		RAB20	5.55476	3.03142	3.68685
ECD	5.79368	5.79368	12.9611	15.7523	8.29515		ECD	2.23711	2.71887	1.43176
HELLS	23.6818	23.6818	58.6944	61.5301	56.4463		HELLS	2.47846	2.5982	2.38353
FBXO6	12.9397	12.9397	47.2397	27.9709	51.5783		FBXO6	3.65075	2.16164	3.98605
NAV2	28.6156	28.6156	86.2787	83.2976	68.8428		NAV2	3.0151	2.91092	2.40578
CDC42SE2	93.161	93.161	119.147	130.146	129.154		CDC42SE2	1.27893	1.397	1.38635
CNKSR3	0	1	0.308316	4.85425	1.96793		CNKSR3	0.308316	4.85425	1.96793
HNRNPM	298.81	298.81	585.669	710.248	882.226		HNRNPM	1.96	2.37692	2.95246
EXTL2	6.0512	6.0512	13.453	18.3437	17.1326		EXTL2	2.22319	3.03142	2.83127
FER	0.54828	0.54828	3.53644	0	1.44388		FER	6.45007	0	2.63347
ELMO1	1.62946	1.62946	7.17107	4.93957	6.33246		ELMO1	4.4009	3.03142	3.88625
CCR1	0	1	0	0	0		CCR1	0	0	0
TMEM192	0	1	2.09823	3.30354	0.95662		TMEM192	2.09823	3.30354	0.95662
NUDT1	10.3582	10.3582	13.9218	33.565	35.4445		NUDT1	1.34404	3.24044	3.42189
TRIM69	760.595	760.595	1162.29	1516.31	1429.43		TRIM69	1.52813	1.99359	1.87936
CRYL1	0.709226	0.709226	4.76574	5.73324	3.3204		CRYL1	6.71963	8.08379	4.68172
NOX4	3.08281	3.08281	14.5692	14.4427	16.2345		NOX4	4.72597	4.68492	5.26614
PRKCI	13.3967	13.3967	19.9967	27.1097	27.3247		PRKCI	1.49266	2.0236	2.03965
DCX	7.8397	7.8397	6.28684	6.60484	13.2873		DCX	0.801923	0.842487	1.69488
TYMS	20.8507	20.8507	24.8381	23.7778	30.2838		TYMS	1.19124	1.14039	1.45242
LY6H	6598.47	6598.47	2958.35	1407.4	2332.78		LY6H	0.44834	0.213292	0.353534
NMT2	6.53512	6.53512	18.2749	30.1877	22.9467		NMT2	2.79641	4.61931	3.51129
C14orf179	2.73118	2.73118	5.2586	4.13968	2.39749		C14orf179	1.92539	1.51571	0.877822
DNM2	4.22611	4.22611	30.4196	26.4521	29.5535		DNM2	7.19801	6.25921	6.99308
VRK1	27.2474	27.2474	58.0282	76.5655	92.1182		VRK1	2.12968	2.81001	3.3808
NHP2L1	508.657	508.657	1000.24	993.558	738.433		NHP2L1	1.96643	1.9533	1.45173
PSMG3	3.78258	3.78258	5.3689	6.58986	6.31137		PSMG3	1.41938	1.74216	1.66853
LOC732435	1.92018	1.92018	3.6971	5.82086	1.68557		LOC732435	1.92539	3.03142	0.877822
AGR3	68.5262	68.5262	94.1615	96.0128	47.5267		AGR3	1.3741	1.40111	0.693555
FSTL1	73.4746	73.4746	168.075	293.626	360.588		FSTL1	2.28753	3.99629	4.90766
HMCN1	0.199873	0.199873	0	0.605899	1.75453		HMCN1	0	3.03142	8.77822
MYO19	0	1	1.33119	0	0.606912		MYO19	1.33119	0	0.606912
DOLK	1.18523	1.18523	20.5383	7.18586	13.5255		DOLK	17.3285	6.06284	11.4117
BET1	90.6857	90.6857	91.8711	83.1113	96.7212		BET1	1.01307	0.916476	1.06655
NOL11	13.0114	13.0114	36.6019	43.9438	46.7794		NOL11	2.81305	3.37731	3.59525
UGGT2	3.42118	3.42118	3.41512	10.4797	12.7662		UGGT2	0.998228	3.06317	3.73151
EZH2	11.4331	11.4331	38.8482	41.1547	38.9759		EZH2	3.39789	3.59962	3.40905
PCDH1	0	1	0.325129	0	1.48232		PCDH1	0.325129	0	1.48232
LONP1	9.69526	9.69526	28.3897	36.1318	47.2185		LONP1	2.9282	3.72675	4.87027
GNA14	7.9937	7.9937	21.5128	29.3296	19.9148		GNA14	2.69121	3.66908	2.49132
MAD1L1	1.69645	1.69645	2.61307	1.5428	4.76539		MAD1L1	1.54032	0.909426	2.80903
CYP26B1	35.2925	35.2925	35.0313	23.9704	56.5692		CYP26B1	0.992599	0.679191	1.60287
ZNF568	0.572563	0.572563	1.40379	0.817893	1.14443		ZNF568	2.45176	1.42848	1.99878
CRLF1	24.7869	24.7869	28.6348	42.0782	81.5423		CRLF1	1.15524	1.6976	3.28973
OGN	164.561	164.561	55.1721	66.3757	106.106		OGN	0.335269	0.40335	0.644784
ANKRD10	79.4994	79.4994	197.503	171.635	155.783		ANKRD10	2.48434	2.15894	1.95955
HSPA12B	2.12589	2.12589	3.66653	7.34712	34.6485		HSPA12B	1.7247	3.45602	16.2983
SFXN2	4.77257	4.77257	12.4369	7.33632	12.9225		SFXN2	2.60591	1.53718	2.70765
ENDOD1	1.14809	1.14809	5.61752	2.61027	0.503912		ENDOD1	4.89291	2.27357	0.438911
TUBE1	2.44833	2.44833	3.2998	4.45315	7.30728		TUBE1	1.34778	1.81885	2.9846
ITPK1	0.977156	0.977156	5.17388	2.96217	6.86216		ITPK1	5.29483	3.03142	7.02258
ERGIC1	18.1997	18.1997	42.4823	62.6585	63.5019		ERGIC1	2.33423	3.44283	3.48916
SP3	28.2368	28.2368	66.0648	87.7503	78.3216		SP3	2.33967	3.10766	2.77374
C17orf37	47.3738	47.3738	72.7258	66.2147	62.4478		C17orf37	1.53515	1.39771	1.31819
ATXN7L3	17.1899	17.1899	37.1493	50.4558	44.4512		ATXN7L3	2.16111	2.9352	2.58589
SAE1	14.6227	14.6227	32.1358	43.1498	51.7161		SAE1	2.19767	2.95087	3.53669
UBA5	29.0578	29.0578	56.0964	70.2321	78.9411		UBA5	1.93051	2.41698	2.71669
GNAO1	4.17274	4.17274	5.73473	6.10657	4.79843		GNAO1	1.37433	1.46345	1.14995
CTTNBP2NL	6.05308	6.05308	17.1058	19.4312	12.4105		CTTNBP2NL	2.82596	3.21014	2.05028
SLC4A7	0	1	2.79984	2.03612	1.76882		SLC4A7	2.79984	2.03612	1.76882
PSMD8	92.1823	92.1823	263.648	335.643	322.547		PSMD8	2.86007	3.64107	3.49901
TMOD3	2.40811	2.40811	9.47712	9.48998	7.61		TMOD3	3.93551	3.94085	3.16016
BIRC5	11.7715	11.7715	26.3681	60.6846	31.0639		BIRC5	2.23999	5.15522	2.63891
MYOG	7.49394	7.49394	0	0	0.713487		MYOG	0	0	0.095209
GMPR2	0.626382	0.626382	1.20603	3.79766	2.74926		GMPR2	1.92539	6.06284	4.38911
DEXI	16.5692	16.5692	38.0372	57.9555	44.7532		DEXI	2.29566	3.49779	2.70099
MMP3	10.3595	10.3595	54.889	22.4584	12.8932		MMP3	5.29841	2.1679	1.24457
FBXO44	0.62896	0.62896	0.90028	2.62582	2.65403		FBXO44	1.43138	4.17485	4.21971
CPN1	0	1	0	0	0		CPN1	0	0	0
TFDP1	20.9653	20.9653	57.9167	76.1129	80.4721		TFDP1	2.7625	3.63042	3.83834
PSTPIP2	0	1	0	0	0.846483		PSTPIP2	0	0	0.846483
FDX1	62.9815	62.9815	93.3013	91.0526	103.528		FDX1	1.48141	1.44571	1.64379
RTEL1	0.37423	0.37423	1.44108	4.5378	0.985523		RTEL1	3.85079	12.1257	2.63347
TM9SF4	58.6643	58.6643	83.4176	65.8208	70.4838		TM9SF4	1.42195	1.12199	1.20148
ITPRIP	0	1	0	0	0		ITPRIP	0	0	0
EPHB3	1.40751	1.40751	9.27975	6.77263	9.27104		EPHB3	6.59302	4.81178	6.58683
TMEM48	8.94229	8.94229	40.5621	51.5089	43.4275		TMEM48	4.53598	5.76014	4.85641
CASP7	6.21018	6.21018	16.1361	13.0862	15.7948		CASP7	2.59833	2.10722	2.54338
LRP4	0.53494	0.53494	1.54495	0	2.34791		LRP4	2.88809	0	4.38911
GINS1	18.7746	18.7746	30.4408	35.8856	29.674		GINS1	1.62139	1.91139	1.58054
FLRT2	0.488036	0.488036	5.16814	5.91777	3.42727		FLRT2	10.5897	12.1257	7.02258
METT10D	4.3854	4.3854	16.5381	27.0993	22.8089		METT10D	3.77118	6.17944	5.2011
TMEM132A	11.772	11.772	41.0151	60.8761	41.5417		TMEM132A	3.48412	5.17125	3.52885
MRC2	0.903428	0.903428	2.02936	4.16926	5.32132		MRC2	2.24629	4.61493	5.89015
SNAI1	1.96995	1.96995	11.2885	7.10921	8.23459		SNAI1	5.73034	3.60884	4.18011
SEC23IP	7.39566	7.39566	17.5116	16.0835	11.3019		SEC23IP	2.36782	2.17471	1.52817
IKBIP	9.67234	9.67234	22.311	33.3903	22.8648		IKBIP	2.30668	3.45214	2.36394
TRIML1	1.92438	1.92438	0.972611	0	1.16559		TRIML1	0.505416	0	0.605697
NR3C1	9.85413	9.85413	16.8839	22.692	9.84726		NR3C1	1.71339	2.30279	0.999303
TMCC1	12.3131	12.3131	19.3706	22.375	27.5712		TMCC1	1.57316	1.81716	2.23916
UPRT	29.3698	29.3698	46.6486	55.6264	53.1208		UPRT	1.58831	1.894	1.80869
PHF14	15.5522	15.5522	54.2849	85.1901	63.7842		PHF14	3.4905	5.47769	4.1013
PCSK2	2.9546	2.9546	1.43174	6.01117	1.76244		PCSK2	0.484579	2.03451	0.596507
PTMA	3133.56	3133.56	3871.27	3881.8	3959.02		PTMA	1.23542	1.23878	1.26343
RGS19	0	1	1.14102	0	1.04042		RGS19	1.14102	0	1.04042
ATG4D	4.58839	4.58839	25.7672	25.5004	32.2223		ATG4D	5.61573	5.55761	7.02258
FAM115C	1.84069	1.84069	7.16115	9.11485	6.54138		FAM115C	3.89047	4.95186	3.55376
PRDM5	6.89217	6.89217	2.65403	0	1.21002		PRDM5	0.385079	0	0.175564
VWC2L	103.947	103.947	153.441	154.719	168.176		VWC2L	1.47615	1.48844	1.61791
FKBP7	105.041	105.041	93.3688	138.681	101.527		FKBP7	0.888876	1.32025	0.966539
C19orf63	22.0925	22.0925	62.3655	57.1553	48.5188		C19orf63	2.82292	2.58709	2.19616
STK35	1.22145	1.22145	4.70353	3.70272	10.7114		STK35	3.85079	3.03142	8.76945
SELM	2.42445	2.42445	5.95189	11.1687	6.47913		SELM	2.45494	4.60668	2.67241
ANO1	0	1	3.06752	0	1.67824		ANO1	3.06752	0	1.67824
NUDT6	0	1	4.93707	6.15694	5.40217		NUDT6	4.93708	6.15694	5.40217
TRNT1	2.29919	2.29919	7.74699	3.48491	14.6325		TRNT1	3.36944	1.51571	6.36421
PTP4A1	129.78	129.78	145.059	166.97	230.852		PTP4A1	1.11773	1.28656	1.77879
TBC1D8	0.992597	0.992597	0.95557	0	0		TBC1D8	0.962697	0	0
SMO	8.74062	8.74062	22.0073	36.6875	15.3395		SMO	2.51782	4.19735	1.75497
RAB3GAP2	1.12345	1.12345	3.64049	4.0868	3.98225		RAB3GAP2	3.24044	3.63771	3.54465
RAD54B	1.13111	1.13111	5.16965	5.14332	3.95677		RAD54B	4.57041	4.54713	3.49812
ZFPL1	7.49911	7.49911	37.416	43.3993	27.5284		ZFPL1	4.9894	5.78726	3.67089
CCDC126	10.3464	10.3464	20.9268	31.3642	22.7147		CCDC126	2.02263	3.03142	2.19543
MFSD6	1.03684	1.03684	6.71226	4.86883	4.66517		MFSD6	6.47377	4.69583	4.49941
COL5A2	116.264	116.264	94.0263	103.334	82.7038		COL5A2	0.808731	0.888787	0.711346
C14orf129	42.3877	42.3877	49.3605	53.4445	57.0619		C14orf129	1.1645	1.26085	1.34619
EEF1E1	14.5247	14.5247	51.156	67.5997	59.9136		EEF1E1	3.522	4.65412	4.12494
PLA2G15	0	1	1.53934	0	0.701811		PLA2G15	1.53934	0	0.701811
MYBL2	3.20964	3.20964	16.658	11.8919	20.5082		MYBL2	5.19001	3.70507	6.38957
HSBP1	448.16	448.16	440.995	412.405	459.112		HSBP1	0.984014	0.920218	1.02444
RARG	0.706038	0.706038	2.31098	2.56836	4.33843		RARG	3.27317	3.63771	6.14476
ZNF207	50.313	50.313	89.5492	133.261	144.568		ZNF207	1.77984	2.64863	2.87337
C14orf104	1.1847	1.1847	3.23333	6.58408	6.23799		C14orf104	2.72925	5.55761	5.26547
BLNK	4.68072	4.68072	11.452	10.1311	8.73775		BLNK	2.44663	2.16444	1.86675
ZNF516	13.9838	13.9838	22.4292	29.3775	31.562		ZNF516	1.60394	2.10082	2.25704
DOT1L	2.85012	2.85012	7.71438	8.09992	10.3313		DOT1L	2.70668	2.84196	3.62486
RNASEH2A	12.6669	12.6669	41.5303	56.5923	63.0394		RNASEH2A	3.27865	4.46774	4.97672
CLN3	2.52713	2.52713	16.3349	5.47199	3.80292		CLN3	6.46382	2.1653	1.50484
RALGPS2	0.340604	0.340604	2.29529	0	0.31394		RALGPS2	6.73888	0	0.921714
ELOVL6	3.19797	3.19797	18.7922	20.4067	19.6535		ELOVL6	5.8763	6.38114	6.14564
MCM7	21.9441	21.9441	85.9367	89.5639	115.999		MCM7	3.91617	4.08146	5.2861
PTPLAD1	9.23655	9.23655	44.0407	55.893	37.9721		PTPLAD1	4.76809	6.05129	4.11107
LOC100134332	14.165	14.165	69.383	73.2749	66.219		LOC100134332	4.89821	5.17297	4.67484
COL6A1	505.706	505.706	255.319	206.992	365.408		COL6A1	0.504875	0.409312	0.722571
NCRNA00094	36.7616	36.7616	83.3675	97.5558	88.6443		NCRNA00094	2.26778	2.65374	2.41133
UAP1	18.8345	18.8345	31.4494	29.8195	28.8312		UAP1	1.66977	1.58324	1.53076
PCBP4	0	1	1.07169	3.37463	2.93162		PCBP4	1.07169	3.37463	2.93162
LSM12	60.6347	60.6347	126.411	152.893	117.252		LSM12	2.08479	2.52154	1.93374
KCTD5	40.5171	40.5171	79.3963	104.656	119.079		KCTD5	1.95958	2.583	2.93898
RNF165	6.09664	6.09664	7.26683	5.77547	11.5598		RNF165	1.19194	0.947319	1.8961
DSPP	222.221	222.221	141.689	218.297	160.187		DSPP	0.637606	0.982342	0.720843
HNRNPL	94.5763	94.5763	207.28	239.769	275.783		HNRNPL	2.19167	2.53519	2.91598
PASK	0	1	5.13112	4.03933	2.33937		PASK	5.13112	4.03933	2.33937
KRT19	1956.97	1956.97	352.352	35.1688	79.78		KRT19	0.180049	0.017971	0.040767
PRMT5	272.703	272.703	286.901	374.807	441.49		PRMT5	1.05206	1.37441	1.61894
S100A16	274.172	274.172	231.92	317.557	328.467		S100A16	0.845893	1.15824	1.19803
DBR1	8.04636	8.04636	13.6433	10.006	12.1596		DBR1	1.69558	1.24354	1.51119
TFAP2B	14.3513	14.3513	19.5735	20.7268	31.9757		TFAP2B	1.36389	1.44424	2.22807
USP48	8.30772	8.30772	10.8896	15.9751	18.2318		USP48	1.31078	1.92292	2.19456
SLC9A6	1.47187	1.47187	6.82976	5.57731	6.81227		SLC9A6	4.6402	3.78928	4.62832
NOP10	213.585	213.585	400.713	510.918	532.845		NOP10	1.87613	2.3921	2.49477
GALNT7	26.8824	26.8824	36.9751	38.4451	36.9934		GALNT7	1.37544	1.43012	1.37612
UBE2J1	5.99828	5.99828	32.8571	41.9615	22.6859		UBE2J1	5.47775	6.99559	3.78206
RCC2	0.354613	0.354613	13.3106	12.8998	13.3916		RCC2	37.5356	36.3771	37.7639
COL6A2	60.0409	60.0409	135.485	116.113	143.794		COL6A2	2.25654	1.9339	2.39494
NAAA	1.40628	1.40628	3.96241	10.3976	1.4934		NAAA	2.81765	7.39371	1.06195
TMEM129	0	1	3.30717	0	1.0052		TMEM129	3.30717	0	1.0052
GABPB2	0.721444	0.721444	5.20899	4.374	3.80297		GABPB2	7.22023	6.06284	5.27132
RP11-345P4.4	3.24916	3.24916	7.29858	3.2832	4.75365		RP11-345P4.4	2.24629	1.01047	1.46304
C9orf41	10.1947	10.1947	25.7429	34.6509	52.8762		C9orf41	2.52514	3.39893	5.18666
BCAS1	109.491	109.491	39.1077	40.1423	42.5958		BCAS1	0.357177	0.366626	0.389034
CLSPN	0.829139	0.829139	3.19284	4.18912	5.84696		CLSPN	3.85079	5.05237	7.05184
PKD2	0	1	0.475104	0	2.16608		PKD2	0.475104	0	2.16608
E2F6	0.933589	0.933589	0	8.4903	1.63905		E2F6	0	9.09426	1.75564
SMARCAL1	2.84425	2.84425	7.05894	5.17326	9.98697		SMARCAL1	2.48183	1.81885	3.51129
CPSF3	25.3856	25.3856	54.5643	69.5465	83.8994		CPSF3	2.14942	2.73961	3.305
CDCA4	33.3606	33.3606	67.5987	102.284	87.93		CDCA4	2.0263	3.06602	2.63575
SULT6B1	13.7846	13.7846	22.2533	30.0266	25.4487		SULT6B1	1.61436	2.17827	1.84617
HK2	32.9365	32.9365	65.5456	87.3197	77.8066		HK2	1.99006	2.65115	2.36232
LOXL2	5.14647	5.14647	12.9776	14.9281	15.5118		LOXL2	2.52165	2.90065	3.01407
WASF1	10.7448	10.7448	10.3808	18.0132	17.3872		WASF1	0.966128	1.67647	1.6182
TPST1	2.1056	2.1056	7.09471	4.25532	7.39339		TPST1	3.36944	2.02095	3.51129
CCDC109A	156.385	156.385	77.0981	75.0419	86.4051		CCDC109A	0.493003	0.479854	0.552516
HSPA8	379.327	379.327	992.204	1000.97	1034.9		HSPA8	2.61569	2.63882	2.72826
GPAM	0.296307	0.296307	0.855763	4.49116	3.64147		GPAM	2.88809	15.1571	12.2895
PLXNA1	0	1	1.0539	0.553103	2.2423		PLXNA1	1.0539	0.553103	2.2423
FLJ41603	0	1	0	0	0		FLJ41603	0	0	0
MGAT1	7.44702	7.44702	38.5204	51.6181	37.5354		MGAT1	5.1726	6.93138	5.04033
MIIP	0.374868	0.374868	4.33061	5.68192	3.61974		MIIP	11.5524	15.1571	9.65605
TMEM177	7.25953	7.25953	22.963	44.0134	31.8629		TMEM177	3.16315	6.06284	4.38911
KIF18B	0	1	1.2789	2.68475	2.3323		KIF18B	1.2789	2.68475	2.3323
PIGA	3.27103	3.27103	12.8885	28.2036	18.0487		PIGA	3.94018	8.62223	5.51774
DIP2C	4.65881	4.65881	4.14002	1.08637	4.08961		DIP2C	0.888644	0.233186	0.877822
MED11	3.20496	3.20496	14.1929	13.6018	8.44015		MED11	4.42841	4.24399	2.63347
YAP1	16.6297	16.6297	18.5381	31.1993	47.3409		YAP1	1.11476	1.87611	2.84676
ERCC2	7.15334	7.15334	7.49414	10.2046	15.6744		ERCC2	1.04764	1.42655	2.1912
NCF2	6.09819	6.09819	51.7949	83.8988	45.0954		NCF2	8.49348	13.758	7.39488
GALNT1	135.35	135.35	127.923	197.884	200.608		GALNT1	0.945123	1.46201	1.48214
DDX42	2.79839	2.79839	10.0899	9.61418	10.1535		DDX42	3.60562	3.43561	3.62833
RIN2	3.11858	3.11858	5.94821	1.20535	5.59147		RIN2	1.90734	0.386506	1.79295
FAM198A	6.16247	6.16247	16.6824	24.8965	27.1719		FAM198A	2.7071	4.04002	4.40925
KLHL13	6.10723	6.10723	23.5176	11.1081	11.537		KLHL13	3.85079	1.81885	1.88907
CTDSP2	0.809798	0.809798	7.01631	17.1839	0.710859		CTDSP2	8.66427	21.22	0.877822
PMS2L3	0	1	4.81364	0	10.3277		PMS2L3	4.81364	0	10.3277
MVK	1.73738	1.73738	5.33153	8.72533	3.95738		MVK	3.06872	5.02212	2.27778
THBS4	33.7785	33.7785	61.096	114.618	97.853		THBS4	1.80872	3.39322	2.8969
BRD3	10.3857	10.3857	41.5224	54.1493	35.4337		BRD3	3.99804	5.21383	3.41178
PPP2R5B	0	1	1.29159	4.06706	2.061		PPP2R5B	1.29159	4.06706	2.061
GNB5	9.90069	9.90069	16.1366	15.2437	19.8197		GNB5	1.62985	1.53966	2.00185
USP11	0.416402	0.416402	2.38116	0	0.365527		USP11	5.71842	0	0.877822
CLP1	14.8074	14.8074	31.1551	34.5864	25.7232		CLP1	2.10402	2.33575	1.73718
POLR3C	17.1667	17.1667	46.8598	52.8831	48.9346		POLR3C	2.7297	3.08057	2.85056
CEP97	0	1	0	6.1999	2.693		CEP97	0	6.19989	2.693
PDE12	10.2945	10.2945	26.9867	45.9759	36.3239		PDE12	2.62148	4.46609	3.52849
TTRAP	20.909	20.909	18.8955	22.1999	31.5503		TTRAP	0.9037	1.06174	1.50893
NCBP1	6.8971	6.8971	24.3337	25.7792	34.4791		NCBP1	3.5281	3.73768	4.99908
FAM76B	0.622753	0.622753	3.46323	4.79144	7.48683		FAM76B	5.56116	7.69396	12.0222
PAX7	5.08137	5.08137	8.03482	15.4093	24.9918		PAX7	1.58123	3.0325	4.91831
SLC39A9	2.76884	2.76884	4.697	3.69758	3.74754		SLC39A9	1.69638	1.33543	1.35347
TMEM167B	20.3702	20.3702	57.2984	34.4736	49.4766		TMEM167B	2.81285	1.69235	2.42887
LSAMP	1.66561	1.66561	1.14534	7.22029	7.10166		LSAMP	0.687641	4.33493	4.26371
VEZF1	34.1604	34.1604	86.5559	82.358	108.396		VEZF1	2.53381	2.41092	3.17315
BASP1	98.0249	98.0249	187.455	246.672	297.371		BASP1	1.91232	2.51642	3.03362
LIG3	4.04555	4.04555	18.2689	18.8673	18.0186		LIG3	4.51579	4.66373	4.45394
TAF1B	11.1888	11.1888	10.4857	28.7333	22.4001		TAF1B	0.937167	2.56806	2.00202
ANXA7	131.124	131.124	209.986	235.886	225.625		ANXA7	1.60143	1.79896	1.7207
EIF4E	108.203	108.203	202.287	230.018	210.359		EIF4E	1.8695	2.12579	1.9441
TGFB2	3.50654	3.50654	12.4902	15.9447	5.84843		TGFB2	3.56198	4.54713	1.66786
ERN1	0.341398	0.341398	0.985988	1.03492	2.12178		ERN1	2.88809	3.03142	6.21498
ADCK4	2.25498	2.25498	1.08543	0	1.97947		ADCK4	0.481349	0	0.877822
SH3PXD2B	0.330368	0.330368	2.22631	2.10813	1.71828		SH3PXD2B	6.73888	6.38114	5.2011
C11orf24	9.76748	9.76748	20.8831	30.639	26.6732		C11orf24	2.13802	3.13684	2.73082
C7orf10	0	1	0	0	0		C7orf10	0	0	0
GOLGA6L2	7.05724	7.05724	22.995	31.2674	20.4912		GOLGA6L2	3.25836	4.43054	2.90357
PITRM1	15.0957	15.0957	37.6102	40.882	44.9457		PITRM1	2.49145	2.70818	2.97737
IL10RB	0	1	0.944905	0	0		IL10RB	0.944905	0	0
ALG14	2.42493	2.42493	7.78157	9.80131	4.96686		ALG14	3.20899	4.0419	2.04825
TTK	2.69738	2.69738	13.9779	11.6121	18.6371		TTK	5.18204	4.30498	6.90935
KLHL28	2.33484	2.33484	4.97489	1.42412	3.7115		KLHL28	2.13072	0.609944	1.58962
GLI3	0.731822	0.731822	1.40905	9.50769	10.5805		GLI3	1.92539	12.9918	14.4577
BRCA1	4.30255	4.30255	16.5682	24.7814	15.4852		BRCA1	3.85079	5.7597	3.59907
FAT2	0	1	0.731118	0	0.166665		FAT2	0.731118	0	0.166665
KIAA1468	2.61349	2.61349	7.54801	6.33808	7.4561		KIAA1468	2.88809	2.42514	2.85292
WDR66	0.92768	0.92768	0	0	0.814338		WDR66	0	0	0.877822
CHSY1	3.26727	3.26727	28.0988	48.697	26.6349		CHSY1	8.60009	14.9045	8.15204
C5orf24	3.63405	3.63405	22.714	21.4268	15.1687		C5orf24	6.25031	5.89611	4.17405
PRDXDD1P	52.7425	52.7425	86.8108	100.397	93.4342		PRDXDD1P	1.64594	1.90352	1.77152
TIAM1	6.75285	6.75285	17.5374	16.6622	9.9077		TIAM1	2.59704	2.46744	1.46719
FAM53B	0	1	1.93296	3.04333	0		FAM53B	1.93296	3.04333	0
RAD54L	0.246066	0.246066	2.37361	4.47558	4.22069		RAD54L	9.64623	18.1885	17.1527
MAL	26.43	26.43	18.9243	7.17459	8.79235		MAL	0.716015	0.271456	0.332665
ARPP19	72.1518	72.1518	143.211	184.717	201.735		ARPP19	1.98485	2.56012	2.79598
TMEM209	1.91064	1.91064	7.25499	5.79196	13.178		TMEM209	3.79715	3.03142	6.89718
RAG1AP1	1.44526	1.44526	7.32892	8.47761	5.70907		RAG1AP1	5.07101	5.8658	3.9502
TRAPPC2	10.2865	10.2865	8.70032	13.7067	13.1179		TRAPPC2	0.845798	1.33249	1.27525
PPP2R2D	11.6387	11.6387	39.4796	43.9149	38.0181		PPP2R2D	3.39209	3.77317	3.26652
NOS2	1.27667	1.27667	0.175578	0.552873	2.32783		NOS2	0.137528	0.43306	1.82336
PTPN4	0	1	1.93472	1.21844	1.05849		PTPN4	1.93472	1.21844	1.05849
CENPP	7.56133	7.56133	18.5117	35.264	28.0511		CENPP	2.44821	4.66373	3.70981
TP53RK	8.61358	8.61358	15.4737	20.8822	14.6008		TP53RK	1.79644	2.42433	1.6951
RG9MTD2	2.47232	2.47232	13.3592	20.3426	11.459		RG9MTD2	5.40348	8.22814	4.6349
ERO1L	13.9531	13.9531	47.5294	59.1076	41.7425		ERO1L	3.40638	4.23618	2.99164
KDM4B	9.34444	9.34444	14.4711	18.184	21.7086		KDM4B	1.54863	1.94597	2.32316
LOC285550	1.24332	1.24332	2.39388	6.2817	0.363804		LOC285550	1.92539	5.05237	0.292607
SAMD9L	0.853927	0.853927	5.40534	5.48313	4.42906		SAMD9L	6.32998	6.42107	5.18669
CSF1R	0.837562	0.837562	16.7311	14.5993	8.95511		CSF1R	19.976	17.4307	10.6919
MGRN1	0.414439	0.414439	1.59592	2.51268	2.91043		MGRN1	3.85079	6.06284	7.02258
SFRS13B	25.8141	25.8141	43.7979	71.4068	82.514		SFRS13B	1.69667	2.76619	3.19647
YPEL2	1.44439	1.44439	1.36996	4.31384	8.61309		YPEL2	0.94847	2.98662	5.96314
JMJD8	11.0114	11.0114	21.9079	20.028	18.6876		JMJD8	1.98957	1.81885	1.69712
USP3	2.56579	2.56579	7.00438	9.61943	9.55042		USP3	2.72991	3.74911	3.72221
POLH	0.511303	0.511303	5.41453	4.64992	6.28366		POLH	10.5897	9.09426	12.2895
DRAP1	31.71	31.71	113.591	148.357	112.882		DRAP1	3.58219	4.67856	3.55983
MED6	13.0653	13.0653	39.5096	25.976	27.5463		MED6	3.02401	1.98816	2.10835
PRKAG1	7.52243	7.52243	17.117	26.9498	24.0122		PRKAG1	2.27547	3.58259	3.19208
SLC33A1	14.4713	14.4713	30.9206	26.2732	33.039		SLC33A1	2.13669	1.81554	2.28308
APPL1	17.2236	17.2236	31.1659	24.09	26.5364		APPL1	1.80949	1.39866	1.5407
DNASE1L1	6.18061	6.18061	17.9931	16.4666	11.1965		DNASE1L1	2.91121	2.66423	1.81156
ACP2	1.45218	1.45218	1.11841	3.52174	1.27476		ACP2	0.770158	2.42514	0.877822
B4GALT1	4.5381	4.5381	20.8392	38.2549	22.3628		B4GALT1	4.59204	8.42971	4.9278
BCL9	5.8239	5.8239	17.1533	17.6394	18.2287		BCL9	2.94533	3.0288	3.12998
CBX3	64.2566	64.2566	216.184	242.328	303.926		CBX3	3.36439	3.77126	4.72989
LUC7L2	37.458	37.458	88.3854	97.8236	93.0935		LUC7L2	2.35959	2.61155	2.48528
LMNA	2.99857	2.99857	28.4209	34.1596	33.7468		LMNA	9.47815	11.3919	11.2543
TBPL1	16.9552	16.9552	55.2615	31.7981	67.2731		TBPL1	3.25926	1.87542	3.96769
BTBD7	5.72267	5.72267	7.57777	11.1226	8.05107		BTBD7	1.32417	1.94361	1.40687
PRKACA	1.09565	1.09565	4.21911	5.53562	2.24416		PRKACA	3.85079	5.05237	2.04825
GPR64	8.88916	8.88916	14.0212	18.1716	19.3507		GPR64	1.57734	2.04425	2.17689
HNRNPUL1	4.32759	4.32759	35.0464	33.082	10.4369		HNRNPUL1	8.09838	7.64445	2.41172
NAT2	11.4591	11.4591	9.37165	0.499243	3.13279		NAT2	0.817836	0.043567	0.273389
PPP3CA	43.1524	43.1524	71.7804	55.1023	59.7719		PPP3CA	1.66342	1.27692	1.38513
SNRPA	94.1874	94.1874	209.362	267.201	322.673		SNRPA	2.22282	2.83691	3.42586
SFMBT1	0	1	1.02747	3.23538	1.87377		SFMBT1	1.02747	3.23538	1.87377
CDKN2D	2.60962	2.60962	1.25614	0	1.14539		CDKN2D	0.481349	0	0.438911
C5orf54	0	1	3.57733	1.08891	2.17463		C5orf54	3.57733	1.08891	2.17463
KIAA0562	2.3022	2.3022	2.21632	1.74473	4.04185		KIAA0562	0.962697	0.757855	1.75564
CCDC90B	19.6622	19.6622	39.3417	38.0467	41.9254		CCDC90B	2.00087	1.93501	2.13228
GFRA2	0	1	0	1.94029	0		GFRA2	0	1.94029	0
TMEM8A	0.287211	0.287211	1.93548	0.870658	0.504241		TMEM8A	6.73888	3.03142	1.75564
OTOF	1.48941	1.48941	7.23324	5.55697	4.36886		OTOF	4.85644	3.73098	2.93328
U2AF1	73.3685	73.3685	143.346	171.3	144.071		U2AF1	1.95378	2.33479	1.96366
LSR	0	1	6.36936	1.5428	2.23378		LSR	6.36936	1.5428	2.23378
SFRP4	4.35906	4.35906	8.39291	8.25884	3.82648		SFRP4	1.92539	1.89464	0.877822
NAA30	75.0195	75.0195	125.358	127.867	137.641		NAA30	1.67101	1.70445	1.83473
NAA10	244.816	244.816	348.451	377.188	404.968		NAA10	1.42332	1.5407	1.65417
UBTD1	2.69767	2.69767	0	0	7.10423		UBTD1	0	0	2.63347
NAA25	11.6528	11.6528	27.7054	33.2292	40.9954		NAA25	2.37758	2.85162	3.51809
EPHA7	2.56427	2.56427	18.5349	18.0083	17.6538		EPHA7	7.22814	7.02276	6.88454
C8orf33	1.50075	1.50075	2.88954	0	6.58697		C8orf33	1.92539	0	4.38911
MED7	4.77093	4.77093	9.22036	9.64179	10.8156		MED7	1.93261	2.02095	2.26698
ENDOU	94.8715	94.8715	135.863	124.625	61.4453		ENDOU	1.43207	1.31362	0.647668
CBX6	2.30012	2.30012	4.08518	3.13021	0.911522		CBX6	1.77607	1.36089	0.396293
MATN1	12.418	12.418	3.39599	0.646919	2.40534		MATN1	0.273473	0.052095	0.193697
HYOU1	25.8273	25.8273	72.2782	69.2863	80.9604		HYOU1	2.79851	2.68267	3.13468
DSG2	2.83374	2.83374	20.6269	20.8629	12.5719		DSG2	7.27903	7.36232	4.43652
ZCCHC10	13.7681	13.7681	38.1234	23.5032	31.8919		ZCCHC10	2.76896	1.70707	2.31635
GPSM2	1.05299	1.05299	3.58928	4.13785	6.36594		GPSM2	3.40866	3.92962	6.0456
DET1	0	1	4.62642	2.42801	2.10927		DET1	4.62642	2.42801	2.10927
EDC4	0.416402	0.416402	2.00434	3.73638	3.65527		EDC4	4.81349	8.97301	8.77822
NOP56	65.0317	65.0317	84.8198	110.32	99.7349		NOP56	1.30428	1.6964	1.53364
SLTM	46.7489	46.7489	116.035	150.913	141.602		SLTM	2.4821	3.22816	3.029
PSMB3	163.837	163.837	176.923	197.672	254.418		PSMB3	1.07987	1.20652	1.55287
NASP	43.9685	43.9685	155.242	179.631	238.135		NASP	3.53074	4.08545	5.41604
ANKS1B	3.79428	3.79428	10.0075	14.1491	10.0697		ANKS1B	2.63753	3.72906	2.65391
GTF3C4	0	1	1.9448	2.04131	0.591112		GTF3C4	1.9448	2.04131	0.591112
TTBK1	0	1	0	0	0		TTBK1	0	0	0
CCDC80	13.5211	13.5211	36.9135	59.0456	46.4538		CCDC80	2.73007	4.36693	3.43566
SLC39A11	0.415222	0.415222	3.99733	5.27401	2.54779		SLC39A11	9.62697	12.7017	6.13598
EIF2AK3	5.31725	5.31725	12.0728	16.1188	13.3762		EIF2AK3	2.27051	3.03142	2.51563
MMP10	0.273279	0.273279	22.3508	9.12896	1.03701		MMP10	81.7876	33.4053	3.79468
COL12A1	55.7711	55.7711	70.4804	73.825	52.4614		COL12A1	1.26374	1.32371	0.940655
AP1B1	11.5563	11.5563	36.3938	34.8306	41.5129		AP1B1	3.14924	3.01398	3.59222
KIAA0355	4.53224	4.53224	8.13168	7.76881	7.38197		KIAA0355	1.79419	1.71412	1.62877
SERPINB8	0	1	10.547	13.1444	8.51936		SERPINB8	10.547	13.1443	8.51936
SLC35B1	184.015	184.015	233.349	213.832	237.01		SLC35B1	1.2681	1.16204	1.28799
MED14	4.3174	4.3174	8.56459	6.31786	10.1673		MED14	1.98374	1.46335	2.35496
GANAB	0.372486	0.372486	2.97631	1.12916	4.2507		GANAB	7.99039	3.03142	11.4117
COMMD4	2.5528	2.5528	7.37273	10.9501	12.902		COMMD4	2.88809	4.28946	5.05406
DPAGT1	0	1	5.11047	0	4.65992		DPAGT1	5.11047	0	4.65991
NSD1	0.987801	0.987801	2.8624	5.00743	4.64008		NSD1	2.89775	5.06927	4.69738
CSPG4	1.09852	1.09852	3.99296	2.85434	4.86284		CSPG4	3.63487	2.59836	4.42673
OGDHL	0	1	0	0	1.54708		OGDHL	0	0	1.54708
TTC32	22.1023	22.1023	15.6784	28.2112	15.3173		TTC32	0.709356	1.27639	0.693018
CILP	5.61857	5.61857	6.31092	5.38996	6.36924		CILP	1.12322	0.959311	1.1336
SDC1	17.6418	17.6418	115.762	102.97	66.907		SDC1	6.56179	5.83671	3.79252
NHSL2	0	1	2.2227	0	1.01846		NHSL2	2.2227	0	1.01846
GNG12	186.745	186.745	253.128	266.012	277.105		GNG12	1.35547	1.42446	1.48387
METRNL	77.0771	77.0771	97.107	185.282	204.578		METRNL	1.25987	2.40386	2.6542
PAX6	0	1	0	0	0		PAX6	0	0	0
DCUN1D3	0.45709	0.45709	3.52031	4.36474	5.21617		DCUN1D3	7.70158	9.54898	11.4117
SMARCE1	10.368	10.368	12.3138	19.4858	20.2761		SMARCE1	1.18767	1.87942	1.95564
FPGS	27.0554	27.0554	43.7482	55.6477	64.7517		FPGS	1.61699	2.05681	2.3933
ANTXR1	0.939975	0.939975	5.05302	7.27182	12.377		ANTXR1	5.3757	7.73619	13.1673
CTGF	203.348	203.348	120.846	36.9442	22.3919		CTGF	0.594283	0.18168	0.110116
LOC100128267	4.44253	4.44253	1.10072	0	0		LOC100128267	0.247769	0	0
BRD1	9.64707	9.64707	7.02816	11.8843	11.1139		BRD1	0.728528	1.23191	1.15205
GAN	1.23517	1.23517	11.8909	18.7216	15.1796		GAN	9.62697	15.1571	12.2895
CCDC85C	0	1	3.98604	2.51032	2.18077		CCDC85C	3.98604	2.51031	2.18077
TCF7L1	3.51952	3.51952	10.5268	10.0023	10.0409		TCF7L1	2.99098	2.84196	2.85292
STK17B	6.22246	6.22246	13.9775	11.0034	7.73813		STK17B	2.24629	1.76833	1.24358
LIX1L	1.28074	1.28074	4.08933	6.47076	1.87377		LIX1L	3.19295	5.05237	1.46304
CHCHD1	400.061	400.061	391.631	509.23	620.989		CHCHD1	0.978929	1.27288	1.55224
LRCH3	0	1	1.05042	0	0		LRCH3	1.05042	0	0
HEXA	102.967	102.967	99.9364	102.955	123.432		HEXA	0.970564	0.999875	1.19874
TUFM	59.1157	59.1157	97.5951	124.508	125.118		TUFM	1.65092	2.10617	2.11649
EHD4	0.445512	0.445512	3.00225	5.40214	2.73756		EHD4	6.73888	12.1257	6.14476
CASP5	6.04723	6.04723	16.6333	5.23763	25.0253		CASP5	2.75056	0.86612	4.13831
FLRT3	4.89303	4.89303	5.80962	5.46837	17.4285		FLRT3	1.18733	1.11758	3.56191
HIVEP3	0	1	1.3382	0	0		HIVEP3	1.3382	0	0
TUBA1B	246.868	246.868	497.404	636.951	519.675		TUBA1B	2.01486	2.58012	2.10507
TTC13	0	1	1.85666	1.9488	2.82161		TTC13	1.85666	1.9488	2.82161
PAPSS2	0.401571	0.401571	1.15977	1.21733	0.705016		PAPSS2	2.88809	3.03142	1.75564
PPPDE1	3.06238	3.06238	7.29994	7.78154	5.408		PPPDE1	2.38374	2.54101	1.76595
SOX7	0.410187	0.410187	0.394886	1.24345	0		SOX7	0.962697	3.03142	0
MTMR12	2.9737	2.9737	6.45739	4.51857	3.92539		MTMR12	2.1715	1.51951	1.32003
RAB13	1.37628	1.37628	8.61209	4.17207	7.85282		RAB13	6.25753	3.03142	5.70585
TXNDC5	325.602	325.602	533.8	814.66	597.084		TXNDC5	1.63942	2.50201	1.83378
PICK1	1.83983	1.83983	5.92172	3.71821	6.99854		PICK1	3.21862	2.02095	3.8039
EEFSEC	2.3241	2.3241	7.1597	4.2272	6.12045		EEFSEC	3.08063	1.81885	2.63347
ARF1	131.827	131.827	318.667	338.486	323.688		ARF1	2.4173	2.56765	2.45539
FITM2	2.90005	2.90005	6.97968	3.29673	9.14872		FITM2	2.40674	1.13678	3.15467
GNA13	2.6563	2.6563	10.2289	8.67179	12.7314		GNA13	3.85079	3.26461	4.79291
FBXO46	5.22233	5.22233	11.5633	6.33243	14.6514		FBXO46	2.2142	1.21257	2.80552
COMMD8	50.5715	50.5715	68.9649	76.4248	78.9818		COMMD8	1.36371	1.51122	1.56178
ARF4	38.6541	38.6541	109.892	108.329	109.767		ARF4	2.84294	2.80252	2.83974
PVRL3	2.50019	2.50019	17.9737	20.8426	17.3191		PVRL3	7.18894	8.33641	6.92712
ZNF610	2.24921	2.24921	6.49592	3.40915	1.97441		ZNF610	2.88809	1.51571	0.877822
ANKIB1	3.58017	3.58017	6.28695	10.3198	5.98004		ANKIB1	1.75605	2.88249	1.67032
TLK1	9.3797	9.3797	18.1301	22.1784	23.8868		TLK1	1.9329	2.36451	2.54665
REST	1.12174	1.12174	6.47935	3.40045	7.87748		REST	5.77618	3.03142	7.02258
GRAMD1C	0.623717	0.623717	0.60045	0	0.547513		GRAMD1C	0.962697	0	0.877822
PIGK	27.3571	27.3571	38.7445	35.6547	40.2008		PIGK	1.41625	1.3033	1.46948
TAOK3	30.5661	30.5661	28.0487	15.9936	16.1924		TAOK3	0.917639	0.523245	0.52975
ENGASE	4.07778	4.07778	5.8885	4.12049	13.1489		ENGASE	1.44405	1.01047	3.22453
WDR52	7.44305	7.44305	5.34849	13.3744	22.203		WDR52	0.718589	1.79689	2.98305
DEK	91.7995	91.7995	120.016	170.526	229.254		DEK	1.30737	1.85759	2.49734
IPP	1.52416	1.52416	5.86922	0	13.3794		IPP	3.85079	0	8.77822
GBP3	4.2165	4.2165	7.62551	8.3448	8.92022		GBP3	1.8085	1.97908	2.11555
KIAA1826	0.839161	0.839161	2.8275	5.0877	6.62971		KIAA1826	3.36944	6.06284	7.9004
FAM108B1	18.9153	18.9153	61.1143	99.7913	75.0596		FAM108B1	3.23094	5.27568	3.96819
HIST2H3C	16.5869	16.5869	11.8746	13.4424	20.7495		HIST2H3C	0.715902	0.810423	1.25096
ARHGAP26	0	1	1.14102	0	0		ARHGAP26	1.14102	0	0
DNM1	0.380052	0.380052	0	0	2.33533		DNM1	0	0	6.14476
COX4NB	8.29375	8.29375	21.4743	24.2833	26.2764		COX4NB	2.58922	2.9279	3.16822
PCDHGA1	0	1	2.08531	3.2832	0.95073		PCDHGA1	2.08531	3.2832	0.95073
FAM115A	14.0403	14.0403	20.6834	28.7755	25.4947		FAM115A	1.47314	2.0495	1.81582
ZNF451	0.567381	0.567381	2.18486	3.43994	2.98836		ZNF451	3.85079	6.06284	5.26694
EML4	15.7103	15.7103	25.4555	37.9448	38.8746		EML4	1.62031	2.41529	2.47447
GOLGA5	1.37556	1.37556	2.65291	0	2.81749		GOLGA5	1.9286	0	2.04825
VAMP3	28.7514	28.7514	52.867	49.5893	34.3407		VAMP3	1.83876	1.72476	1.1944
NID2	42.6836	42.6836	34.3811	53.0201	67.1117		NID2	0.805487	1.24216	1.5723
AK3	0.977156	0.977156	3.76282	0	3.43108		AK3	3.85079	0	3.51129
SPAG7	57.1193	57.1193	98.9176	70.0431	84.3636		SPAG7	1.73177	1.22626	1.47697
C12orf48	0.388789	0.388789	1.12286	1.17858	2.38901		C12orf48	2.88809	3.03142	6.14476
DPYSL2	15.4575	15.4575	43.5167	56.6594	51.5411		DPYSL2	2.81524	3.66548	3.33437
CRELD2	34.7119	34.7119	91.9852	91.7913	95.3741		CRELD2	2.64996	2.64438	2.74759
NAGK	25.4007	25.4007	51.08	69.8746	66.9637		NAGK	2.01096	2.75089	2.63629
ARHGAP1	2.80564	2.80564	15.7148	23.9689	27.331		ARHGAP1	5.60115	8.5431	9.74143
F13A1	10.0255	10.0255	67.6223	130.788	206.197		F13A1	6.74503	13.0456	20.5673
PRELID2	2.38886	2.38886	6.24052	5.17259	6.14119		PRELID2	2.61235	2.1653	2.57077
NARS	77.7985	77.7985	146.937	257.148	264.96		NARS	1.88868	3.30531	3.40571
MPV17L2	1.75888	1.75888	15.8829	9.34862	13.075		MPV17L2	9.0301	5.31509	7.43369
GNPDA2	0	1	0	0	2.82436		GNPDA2	0	0	2.82436
DSC3	26.7384	26.7384	93.8916	79.5508	60.1844		DSC3	3.51149	2.97515	2.25086
PTK7	4.50903	4.50903	14.5643	24.3017	21.0694		PTK7	3.23002	5.38957	4.67271
NOLC1	17.0406	17.0406	60.1169	53.698	56.4261		NOLC1	3.52786	3.15118	3.31127
CCDC75	10.6879	10.6879	20.3259	21.1025	25.0236		CCDC75	1.90178	1.97444	2.3413
ZNF624	2.56846	2.56846	2.47265	4.67165	3.69763		ZNF624	0.962697	1.81885	1.43963
SSU72	40.5366	40.5366	115.845	131.251	108.388		SSU72	2.85779	3.23784	2.67384
ZFHX4	2.43469	2.43469	5.28758	6.43752	11.5742		ZFHX4	2.17177	2.64409	4.75389
POP1	1.12078	1.12078	4.67555	4.53008	3.27949		POP1	4.17169	4.0419	2.92607
HNF4G	1.15716	1.15716	0	0	1.01578		HNF4G	0	0	0.877822
HNRNPA3	3536.37	3536.37	6881.44	7958.64	6944.62		HNRNPA3	1.9459	2.25051	1.96377
FOXO3B	0.685991	0.685991	5.28321	4.15906	9.63485		FOXO3B	7.70158	6.06284	14.0452
SNRPN	214.375	214.375	607.266	915.7	933.018		SNRPN	2.83273	4.27149	4.35227
FAM101A	0.342728	0.342728	3.62938	0	1.20342		FAM101A	10.5897	0	3.51129
MEMO1	28.393	28.393	38.8797	53.83	65.4112		MEMO1	1.36934	1.89589	2.30378
RPS6KA1	18.5411	18.5411	51.6993	27.1814	28.594		RPS6KA1	2.78837	1.46601	1.5422
ACOXL	2.18759	2.18759	8.12713	8.90135	19.6542		ACOXL	3.71511	4.06902	8.98442
MAP7D3	5.96782	5.96782	12.8726	18.2433	12.434		MAP7D3	2.157	3.05694	2.08352
PSMD7	100.927	100.927	227.87	222.326	238.566		PSMD7	2.25778	2.20285	2.36376
MYH14	16.7412	16.7412	44.3695	61.7123	22.9015		MYH14	2.65032	3.68626	1.36797
AP3S1	57.6131	57.6131	84.1749	93.704	88.1014		AP3S1	1.46104	1.62644	1.52919
FBXL17	1.13917	1.13917	2.19335	10.3599	4.49996		FBXL17	1.92539	9.09426	3.9502
SLC15A3	0	1	1.15117	0	0.586867		SLC15A3	1.15117	0	0.586867
LOC100294238	9.12906	9.12906	6.39097	5.54424	5.52692		LOC100294238	0.700069	0.607318	0.605421
C10orf81	1.12174	1.12174	9.71902	0	7.9661		C10orf81	8.66427	0	7.10158
PHF10	27.4841	27.4841	30.5303	46.0867	58.1537		PHF10	1.11084	1.67685	2.1159
EMD	11.0417	11.0417	25.0239	37.41	38.9246		EMD	2.2663	3.38806	3.52523
TBC1D10A	0	1	3.21914	0	4.403		TBC1D10A	3.21915	0	4.403
ATP2B1	53.2562	53.2562	126.43	132.793	95.0591		ATP2B1	2.374	2.49348	1.78494
FCER1G	3.18638	3.18638	3.32826	0	1.39854		FCER1G	1.04453	0	0.438911
E2F4	2.7333	2.7333	7.89568	5.69648	5.75845		E2F4	2.88869	2.0841	2.10677
PRRG2	1.19489	1.19489	12.6535	10.8667	11.5379		PRRG2	10.5897	9.09426	9.65605
PAICS	111.59	111.59	323.789	375.916	351.555		PAICS	2.90159	3.36871	3.15041
TMEM79	3.46171	3.46171	7.00857	7.72421	10.5478		TMEM79	2.0246	2.23133	3.04699
KIAA1147	0	1	1.14102	0	2.08084		KIAA1147	1.14102	0	2.08084
HMGB3	744.439	744.439	1755.51	2804.22	2584.64		HMGB3	2.35817	3.76688	3.47192
PDIA6	211.011	211.011	320.426	346.932	321.966		PDIA6	1.51853	1.64414	1.52583
ZMAT1	0	1	1.6666	0	0		ZMAT1	1.6666	0	0
UBE2I	73.0449	73.0449	124.472	181.888	164.645		UBE2I	1.70404	2.49008	2.25402
GCC1	7.8573	7.8573	15.4565	19.8357	22.3918		GCC1	1.96715	2.5245	2.84981
TRIM25	4.64821	4.64821	9.16442	5.63627	4.89636		TRIM25	1.9716	1.21257	1.05339
C11orf82	0	1	0.595383	0	0.542892		C11orf82	0.595383	0	0.542892
SULF1	2.3862	2.3862	29.701	24.9384	11.8761		SULF1	12.447	10.4511	4.97701
PTPRS	3.58082	3.58082	8.98975	15.8125	13.9303		PTPRS	2.51053	4.41589	3.89027
KIAA1432	0.68286	0.68286	2.65611	1.04547	4.23234		KIAA1432	3.88969	1.53102	6.19796
C20orf196	2.26807	2.26807	6.23174	14.8659	10.3064		C20orf196	2.74759	6.55443	4.54411
PRTN3	2.1729	2.1729	64.0991	12.3408	3.47119		PRTN3	29.4994	5.67943	1.59749
USP47	4.21378	4.21378	9.30392	11.2709	7.08675		USP47	2.20797	2.67478	1.6818
MUC15	8.68523	8.68523	21.0434	26.565	19.9475		MUC15	2.4229	3.05864	2.29672
MDP1	72.3721	72.3721	130.446	113.147	135.463		MDP1	1.80243	1.56341	1.87176
ST6GAL2	0.798765	0.798765	1.53794	2.42139	0.701174		ST6GAL2	1.92539	3.03142	0.877822
FTO	1.23344	1.23344	1.78114	0	3.24822		FTO	1.44405	0	2.63347
TMEM57	11.0237	11.0237	27.4518	33.5444	37.6079		TMEM57	2.49025	3.04293	3.41154
MOBKL2A	0.577819	0.577819	8.90024	7.00645	13.695		MOBKL2A	15.4032	12.1257	23.7012
METTL13	2.35145	2.35145	13.5824	7.8054	15.4811		METTL13	5.77618	3.31941	6.58367
PYCRL	2.99129	2.99129	17.2783	16.3222	20.5707		PYCRL	5.77618	5.45656	6.87686
UTP14A	2.92729	2.92729	27.3778	15.8461	16.7412		UTP14A	9.3526	5.41325	5.71901
2-sep	82.1385	82.1385	131.656	169.598	157.379		2-sep	1.60285	2.06478	1.91602
MTHFR	7.92754	7.92754	28.5815	19.062	16.5714		MTHFR	3.60534	2.40453	2.09036
PPID	28.5135	28.5135	111.236	141.792	134.22		PPID	3.90117	4.9728	4.70727
DHX29	3.92972	3.92972	13.2912	10.8696	12.4902		DHX29	3.38223	2.76599	3.1784
PAPD7	6.48759	6.48759	12.1908	18.5895	17.7546		PAPD7	1.87909	2.8654	2.7367
TMEM41A	0	1	2.10083	3.30764	2.87342		TMEM41A	2.10083	3.30764	2.87342
C7orf25	18.0125	18.0125	43.7281	73.3022	51.2249		C7orf25	2.42765	4.06952	2.84385
OSGIN2	6.30629	6.30629	12.1421	25.5386	31.0483		OSGIN2	1.92539	4.0497	4.92339
AXIN2	26.9329	26.9329	16.9883	14.1629	27.7507		AXIN2	0.630763	0.525859	1.03037
C16orf87	2.24347	2.24347	2.18138	0	7.87748		C16orf87	0.972324	0	3.51129
VEZT	2.35145	2.35145	2.26373	3.56411	0		VEZT	0.962697	1.51571	0
RFWD3	1.55929	1.55929	5.25394	12.8807	8.21269		RFWD3	3.36944	8.26062	5.26694
MDFIC	3.29449	3.29449	35.4304	23.365	21.0741		MDFIC	10.7544	7.09215	6.39677
C22orf40	4.0243	4.0243	7.47911	2.35508	2.72789		C22orf40	1.85849	0.585216	0.677855
TIMELESS	3.99226	3.99226	6.1506	3.33578	14.6825		TIMELESS	1.54063	0.835563	3.67776
RFPL3	8.51758	8.51758	17.4042	12.9102	5.60769		RFPL3	2.04332	1.51571	0.658367
C16orf13	1.87305	1.87305	5.64996	9.59852	7.84911		C16orf13	3.01645	5.12455	4.19056
RBMS1	90.6729	90.6729	93.3185	113.926	122.827		RBMS1	1.02918	1.25645	1.35462
AEN	1.65231	1.65231	10.9259	12.5284	10.0007		AEN	6.61253	7.58234	6.05259
RP1-21O18.1	6.89757	6.89757	9.13038	13.0684	12.8665		RP1-21O18.1	1.32371	1.89464	1.86537
NMNAT1	2.46638	2.46638	6.44474	13.8852	10.5159		NMNAT1	2.61303	5.62978	4.26371
CPSF6	23.7701	23.7701	45.153	58.0237	57.8933		CPSF6	1.89957	2.44104	2.43556
DPY19L1	9.22783	9.22783	17.1039	13.4758	15.8919		DPY19L1	1.85351	1.46034	1.72217
DCTN1	1.47778	1.47778	6.609	7.46627	3.60628		DCTN1	4.47226	5.05237	2.44035
MRP63	33.8193	33.8193	74.9308	107.419	94.5102		MRP63	2.21563	3.17628	2.79457
C3orf54	8.01401	8.01401	6.74226	28.8129	23.7263		C3orf54	0.841308	3.59532	2.9606
NANS	28.4378	28.4378	51.0899	76.965	79.3302		NANS	1.79655	2.70643	2.7896
NSUN5	6.55269	6.55269	16.8895	24.0459	14.6588		NSUN5	2.57749	3.66961	2.23706
HUS1	10.434	10.434	25.4529	42.8699	21.5929		HUS1	2.43941	4.10866	2.06947
C14orf138	6.19324	6.19324	9.32816	23.8946	15.3212		C14orf138	1.50618	3.85817	2.47386
POLG2	4.27432	4.27432	11.3159	12.2446	26.2881		POLG2	2.64742	2.86469	6.15024
BAG1	87.4464	87.4464	129.797	148.109	179.447		BAG1	1.4843	1.69371	2.05208
CALU	49.7384	49.7384	105.501	130.955	120.742		CALU	2.12112	2.63287	2.42754
ZNF389	2.0989	2.0989	1.0103	0	1.84246		ZNF389	0.481349	0	0.877822
MSL1	8.04509	8.04509	15.4724	19.9559	26.9395		MSL1	1.92321	2.4805	3.34857
MKL2	0.220411	0.220411	7.85312	5.34527	4.64356		MKL2	35.6294	24.2514	21.0677
NSUN3	0	1	2.08874	0	3.17431		NSUN3	2.08874	0	3.17431
ARG1	22.1705	22.1705	132.324	18.5625	15.1159		ARG1	5.96846	0.837262	0.681804
TMEM128	38.938	38.938	45.8619	52.2193	56.8579		TMEM128	1.17782	1.34109	1.46022
SYS1	8.34186	8.34186	20.6925	20.5996	23.6728		SYS1	2.48056	2.46942	2.83783
DBX2	0.552412	0.552412	0.531806	0	0.96984		DBX2	0.962697	0	1.75564
FNIP1	0	1	0.765493	0	0.698004		FNIP1	0.765493	0	0.698004
CHADL	0	1	0	0	0		CHADL	0	0	0
LYN	16.4751	16.4751	50.2633	40.7266	20.0988		LYN	3.05086	2.47201	1.21995
HELZ	13.5127	13.5127	13.8369	15.5696	16.5334		HELZ	1.024	1.15222	1.22355
DRAM2	0	1	2.74881	0	0		DRAM2	2.74882	0	0
SLC35A5	10.3777	10.3777	32.8897	29.0259	23.8174		SLC35A5	3.16928	2.79696	2.29507
SLC35C2	2.31432	2.31432	3.34198	3.50784	7.03935		SLC35C2	1.44405	1.51571	3.04165
ODZ3	4.54463	4.54463	6.12459	13.2696	18.1874		ODZ3	1.34766	2.91985	4.00195
CALHM1	1.87301	1.87301	3.23143	4.07016	3.53584		CALHM1	1.72526	2.17306	1.88779
SRPX	14.1287	14.1287	42.6391	13.0488	27.4085		SRPX	3.0179	0.923567	1.93991
GMDS	310.28	310.28	252.188	255.306	291.493		GMDS	0.812775	0.822823	0.93945
APAF1	4.01877	4.01877	8.08591	11.5582	9.84834		APAF1	2.01204	2.87606	2.45059
RRS1	34.5745	34.5745	90.2551	76.34	69.6361		RRS1	2.61045	2.20798	2.01409
HNRPLL	59.2442	59.2442	109.018	126.544	127.614		HNRPLL	1.84015	2.13597	2.15402
SFRS13A	58.8972	58.8972	163.005	182.442	174.848		SFRS13A	2.76762	3.09764	2.9687
LRRC23	0.50082	0.50082	3.37497	3.0364	2.19816		LRRC23	6.73888	6.06284	4.38911
C1orf77	47.8144	47.8144	131.657	181.46	192.489		C1orf77	2.75349	3.79509	4.02576
SEMA3F	0.649513	0.649513	1.66742	0.656316	1.33037		SEMA3F	2.56719	1.01047	2.04825
TOP1	74.5509	74.5509	159.651	244.563	135.578		TOP1	2.14151	3.28048	1.8186
PPP2R3B	0	1	3.24204	10.2088	5.06779		PPP2R3B	3.24204	10.2088	5.06778
PIGG	1.59223	1.59223	3.76822	8.84898	9.31796		PIGG	2.36663	5.55761	5.85215
MRPL50	49.1456	49.1456	49.3462	52.6246	85.6091		MRPL50	1.00408	1.07079	1.74195
TRAPPC2L	22.6142	22.6142	31.8093	21.7629	20.4972		TRAPPC2L	1.40661	0.962356	0.906386
CDC42EP4	1.18204	1.18204	7.45926	4.51492	2.68745		CDC42EP4	6.31048	3.81959	2.27356
FYTTD1	1.54559	1.54559	7.43967	11.7133	11.5324		FYTTD1	4.81349	7.57855	7.46149
ZNF19	0.48531	0.48531	0.943852	4.45812	1.29096		ZNF19	1.94484	9.18613	2.66007
GALNT5	0.38104	0.38104	1.10048	3.46528	2.00691		GALNT5	2.88809	9.09426	5.26694
CDC26	38.2285	38.2285	48.1369	46.6759	55.1208		CDC26	1.25919	1.22097	1.44188
PTCD3	8.93999	8.93999	32.3349	42.403	49.7837		PTCD3	3.61688	4.74307	5.56865
CD101	0.660241	0.660241	4.44928	6.0044	4.05702		CD101	6.73888	9.09426	6.14476
SLC38A2	30.6478	30.6478	64.3384	102.136	107.417		SLC38A2	2.09929	3.33259	3.50488
GSTM2	0	1	0.0269629	0	2.12667		GSTM2	0.026963	0	2.12667
MIER2	0.852722	0.852722	1.09455	2.58496	3.99221		MIER2	1.2836	3.03142	4.68172
NGF	1.19815	1.19815	0	0	14.8929		NGF	0	0	12.43
WIPF2	4.44507	4.44507	30.4617	30.0594	20.7105		WIPF2	6.85292	6.7624	4.65921
CTNNB1	183.078	183.078	378.08	502.547	555.955		CTNNB1	2.06513	2.74499	3.03671
LIG1	53.0379	53.0379	78.7728	115.118	114.732		LIG1	1.48522	2.17049	2.16321
PDCD6	96.2588	96.2588	140.142	123.004	139.199		PDCD6	1.45589	1.27785	1.44609
LOC100288317	47.8393	47.8393	59.3665	70.4365	60.6823		LOC100288317	1.24096	1.47236	1.26846
THOC4	270.667	270.667	488.639	575.603	501.044		THOC4	1.80532	2.12661	1.85115
MMAB	10.2965	10.2965	27.1425	33.049	27.1101		MMAB	2.63609	3.20974	2.63295
MECR	5.88846	5.88846	6.79203	11.285	15.8687		MECR	1.15345	1.91646	2.69489
UBXN8	0	1	6.04739	3.17376	2.78469		UBXN8	6.04739	3.17376	2.78469
MEGF11	0.646647	0.646647	16.1981	11.7616	6.8117		MEGF11	25.0494	18.1885	10.5339
OPLAH	1.16021	1.16021	2.23387	1.17236	5.76788		OPLAH	1.92539	1.01047	4.9714
ANKRD27	0	1	0	6.48651	0		ANKRD27	0	6.48651	0
NR2F2	5.94264	5.94264	7.81269	12.0814	14.5886		NR2F2	1.31468	2.033	2.45489
C1QTNF6	5.46916	5.46916	3.15909	3.31586	7.68152		C1QTNF6	0.577618	0.606284	1.40452
GMIP	0.542195	0.542195	4.69773	3.28724	1.9038		GMIP	8.66427	6.06284	3.51129
TMEM97	18.2979	18.2979	37.9885	39.868	46.2041		TMEM97	2.07612	2.17883	2.52511
SOLH	0	1	0	0	0		SOLH	0	0	0
LOC100129335	0.570325	0.570325	1.64715	0	1.00129		LOC100129335	2.88809	0	1.75564
EIF4H	112.528	112.528	218.178	238.73	192.182		EIF4H	1.93888	2.12152	1.70787
MORN1	0	1	0.843262	0	0		MORN1	0.843262	0	0
SEMA4B	0.591022	0.591022	3.41385	1.79164	0.518812		SEMA4B	5.77618	3.03142	0.877822
TARS	15.8481	15.8481	36.6142	68.136	82.2582		TARS	2.31032	4.29931	5.1904
SMOX	11.2837	11.2837	26.2977	17.6174	13.1608		SMOX	2.33059	1.56131	1.16636
C2orf49	5.54693	5.54693	22.3552	32.1015	23.9034		C2orf49	4.0302	5.78726	4.30931
C13orf33	5.39855	5.39855	9.11683	13.1978	9.01932		C13orf33	1.68876	2.44469	1.67069
PGAM1	25.8483	25.8483	98.0226	79.0252	63.2348		PGAM1	3.79222	3.05727	2.44638
PGP	2.59677	2.59677	22.4992	31.4877	24.8086		PGP	8.66427	12.1257	9.55363
RND2	0	1	2.76678	0	0		RND2	2.76678	0	0
ITGA2	0	1	4.26096	5.8336	3.37852		ITGA2	4.26096	5.8336	3.37852
ENTPD5	0	1	1.1992	0	1.09347		ENTPD5	1.1992	0	1.09347
ARL9	1.39594	1.39594	17.4702	4.23167	11.0285		ARL9	12.5151	3.03142	7.9004
NCOR2	0.392633	0.392633	3.48975	3.07441	4.07617		NCOR2	8.88808	7.83024	10.3816
ZCCHC6	6.81056	6.81056	9.19677	8.83585	10.0643		ZCCHC6	1.35037	1.29738	1.47775
PDE7A	6.38454	6.38454	10.4056	10.0383	6.89834		PDE7A	1.62981	1.57228	1.08048
TAOK1	0.683857	0.683857	4.77137	4.63847	4.31319		TAOK1	6.97715	6.7828	6.30715
LRWD1	4.49267	4.49267	13.4961	20.0315	22.6044		LRWD1	3.00402	4.45872	5.03139
ZNF347	0	1	4.31957	6.59688	2.0186		ZNF347	4.31957	6.59688	2.0186
ROBO1	0.642773	0.642773	8.01392	6.06915	8.0409		ROBO1	12.4677	9.44213	12.5097
BTN3A2	0	1	9.40706	0	6.43327		BTN3A2	9.40706	0	6.43327
PLVAP	3.08937	3.08937	2.97413	0	3.61589		PLVAP	0.962697	0	1.17043
GIMAP4	40.0904	40.0904	61.6957	76.8802	84.9303		GIMAP4	1.53892	1.91767	2.11847
RAB25	8.60924	8.60924	15.9476	18.2457	12.4918		RAB25	1.85238	2.11932	1.45098
HYLS1	22.3909	22.3909	56.9546	73.0399	58.1403		HYLS1	2.54364	3.26203	2.5966
OSR2	5.02059	5.02059	4.02776	0	3.30539		OSR2	0.802248	0	0.658367
ETV4	4.83548	4.83548	17.8659	19.8565	19.6537		ETV4	3.69475	4.10641	4.06447
B3GNTL1	1.38713	1.38713	0	0	0		B3GNTL1	0	0	0
PARP1	17.029	17.029	43.5512	63.3217	74.869		PARP1	2.55748	3.71847	4.39657
KIF4A	0.790864	0.790864	3.80681	7.19232	8.72889		KIF4A	4.81349	9.09426	11.0372
SGMS2	37.0621	37.0621	8.24644	0	0		SGMS2	0.222503	0	0
GIPC1	1.3126	1.3126	7.58181	3.97904	3.45668		GIPC1	5.77618	3.03142	2.63347
IRF7	0.433222	0.433222	1.66825	1.31328	6.46496		IRF7	3.85079	3.03142	14.923
PMM2	58.4672	58.4672	85.9149	91.6023	126.05		PMM2	1.46946	1.56673	2.1559
5-sep	0.812792	0.812792	3.12989	3.28522	0.475658		5-sep	3.85079	4.0419	0.585215
C6orf72	2.49175	2.49175	14.0307	7.86373	7.45774		C6orf72	5.63087	3.15591	2.99297
C11orf60	1.2147	1.2147	5.45713	3.68226	7.01973		C11orf60	4.49259	3.03142	5.779
UBA6	6.14242	6.14242	11.6671	11.3885	15.8881		UBA6	1.89943	1.85408	2.58661
PI4KB	5.77064	5.77064	13.2344	15.0085	11.3207		PI4KB	2.2934	2.60084	1.96178
MGEA5	7.39394	7.39394	17.4783	20.3805	30.023		MGEA5	2.36388	2.75637	4.0605
COL21A1	1.28198	1.28198	1.23416	0	0		COL21A1	0.962697	0	0
COG3	4.04817	4.04817	7.64732	9.91939	7.57904		COG3	1.88908	2.45034	1.87221
TP53INP1	54.4671	54.4671	59.2706	55.0981	55.4007		TP53INP1	1.08819	1.01159	1.01714
COL4A5	85.7484	85.7484	111.37	146.174	100.413		COL4A5	1.29879	1.70468	1.17102
NMT1	42.0337	42.0337	84.3878	94.9591	88.8435		NMT1	2.00762	2.25912	2.11363
PTDSS2	12.4289	12.4289	21.9459	25.3681	27.3937		PTDSS2	1.76571	2.04105	2.20403
GLT8D2	4.99682	4.99682	2.9397	16.3256	14.6211		GLT8D2	0.588315	3.2672	2.92607
SAFB2	0.969383	0.969383	3.20855	0	1.20185		SAFB2	3.30989	0	1.23981
RBM9	1.96406	1.96406	12.8131	7.44926	15.4531		RBM9	6.52379	3.79278	7.86794
PECI	24.6021	24.6021	41.1791	59.0635	41.1273		PECI	1.67381	2.40075	1.6717
IGFBP5	15.2215	15.2215	37.5459	46.2954	28.4562		IGFBP5	2.46663	3.04144	1.86947
WDR91	2.19723	2.19723	4.95501	4.16295	3.85755		WDR91	2.25512	1.89464	1.75564
UBASH3B	0	1	1.51185	0	0		UBASH3B	1.51185	0	0
SPON1	7.40658	7.40658	6.80573	8.15085	11.6198		SPON1	0.918877	1.10049	1.56885
GRID1	0	1	0	0	0		GRID1	0	0	0
APPBP2	12.742	12.742	26.0595	34.7739	44.535		APPBP2	2.04517	2.72908	3.49515
TRABD	8.16818	8.16818	34.3215	18.9836	22.9614		TRABD	4.20185	2.32409	2.81108
KLHL3	0	1	0	6.88877	0		KLHL3	0	6.88877	0
PDSS1	9.28169	9.28169	21.2217	16.7062	16.5551		PDSS1	2.28641	1.79991	1.78363
HSPE1	1096.97	1096.97	1443.29	1408.76	1797.22		HSPE1	1.3157	1.28423	1.63835
METTL14	12.9585	12.9585	37.4513	57.7284	46.0422		METTL14	2.89009	4.45486	3.55304
VAMP4	0.786028	0.786028	0	0	0.99999		VAMP4	0	0	1.27221
FNDC3B	8.39402	8.39402	9.91375	19.4751	11.4796		FNDC3B	1.18105	2.32012	1.36759
TNPO2	27.1785	27.1785	79.342	85.8308	69.8225		TNPO2	2.91929	3.15804	2.56904
TSN	45.7335	45.7335	152.754	216.702	234.201		TSN	3.34009	4.73837	5.12099
POMGNT1	1.7695	1.7695	0.851745	5.36409	1.55331		POMGNT1	0.481349	3.03142	0.877822
PLEKHG4B	0.239369	0.239369	3.46351	10.1588	6.28268		PLEKHG4B	14.4693	42.4399	26.2469
TMEM180	0.954099	0.954099	7.46288	6.81131	7.12319		TMEM180	7.82191	7.139	7.46588
CDKN2C	29.4958	29.4958	34.6687	23.5301	21.0032		CDKN2C	1.17538	0.797742	0.712076
WDR59	0	1	0	0	1.41737		WDR59	0	0	1.41737
RAD1	0.536899	0.536899	5.29276	3.25513	5.65562		RAD1	9.85802	6.06284	10.5339
REXO1	0.965888	0.965888	3.90075	3.66002	4.45348		REXO1	4.03852	3.78928	4.61076
BTBD10	6.25819	6.25819	11.6912	16.9742	8.67697		BTBD10	1.86814	2.71232	1.3865
PSMD14	75.2477	75.2477	118.046	141.729	188.126		PSMD14	1.56877	1.8835	2.5001
RP1L1	16.7254	16.7254	24.2237	50.4708	77.7051		RP1L1	1.44832	3.01761	4.64594
MGC87042	2.26077	2.26077	39.7636	54.8268	7.08487		MGC87042	17.5885	24.2514	3.13383
SETD1B	1.66435	1.66435	4.80678	3.0272	5.5518		SETD1B	2.88809	1.81885	3.33573
ZNF521	6.4216	6.4216	6.37624	12.2292	17.6354		ZNF521	0.992936	1.90438	2.74627
ATF6B	0	1	0.4849	1.52689	0.884299		ATF6B	0.4849	1.52689	0.884299
GAS2L3	3.31329	3.31329	3.99623	0	2.90848		GAS2L3	1.20612	0	0.877822
MOBKL3	70.0068	70.0068	143.649	162.938	183.705		MOBKL3	2.05193	2.32747	2.6241
MLST8	32.491	32.491	41.8371	53.3191	56.2889		MLST8	1.28765	1.64104	1.73244
AGGF1	17.89	17.89	40.4834	40.0635	45.7379		AGGF1	2.26291	2.23944	2.55662
TEAD1	4.90805	4.90805	9.46484	7.38238	6.28022		TEAD1	1.92843	1.50414	1.27957
IMPACT	1.1451	1.1451	0	0	0		IMPACT	0	0	0
KLHDC5	4.64424	4.64424	7.92729	3.32828	10.5438		KLHDC5	1.70691	0.716648	2.2703
TMTC2	0.240284	0.240284	2.77585	2.18521	2.3202		TMTC2	11.5524	9.09426	9.65605
CAMSAP1L1	6.6576	6.6576	10.7843	15.8516	11.0604		CAMSAP1L1	1.61985	2.38098	1.66131
MIER1	2.16916	2.16916	9.37325	6.57565	8.99298		MIER1	4.32113	3.03142	4.14583
IFRD2	20.6737	20.6737	67.2142	76.2452	75.3486		IFRD2	3.2512	3.68804	3.64467
YIF1B	26.2499	26.2499	47.9953	49.0844	49.1929		YIF1B	1.8284	1.86989	1.87403
LPCAT3	0	1	3.18883	5.02063	3.63462		LPCAT3	3.18883	5.02063	3.63462
TMEM194A	1.11699	1.11699	0	5.64343	1.30735		TMEM194A	0	5.05237	1.17043
ARFGEF1	6.95347	6.95347	12.8061	16.5483	13.718		ARFGEF1	1.84168	2.37987	1.97283
RNGTT	5.90842	5.90842	10.9051	9.36518	19.6614		RNGTT	1.84569	1.58506	3.32769
RAB34	4.83969	4.83969	19.3022	22.0067	17.9039		RAB34	3.98832	4.54713	3.69939
C7orf55	153.059	153.059	274.21	170.349	106.056		C7orf55	1.79153	1.11296	0.692912
NAT14	0	1	1.68989	0	0		NAT14	1.68989	0	0
C3orf32	19.729	19.729	85.4022	90.0621	86.9899		C3orf32	4.32876	4.56495	4.40923
EI24	1.54072	1.54072	9.24654	9.34112	6.76237		EI24	6.00145	6.06284	4.38911
ABCA6	0	1	0	0	0		ABCA6	0	0	0
CARS	45.7428	45.7428	74.8394	119.369	138.135		CARS	1.63609	2.60958	3.01981
SNRPC	121.69	121.69	160.73	149.613	138.116		SNRPC	1.32082	1.22945	1.13498
HMGCR	45.1342	45.1342	42.8836	64.4952	74.9709		HMGCR	0.950135	1.42897	1.66106
TMEM101	4.98534	4.98534	25.1352	14.926	21.0838		TMEM101	5.04182	2.99397	4.22916
C7orf52	5.12003	5.12003	6.52373	5.02149	5.552		C7orf52	1.27416	0.980754	1.08437
TOB2	23.8598	23.8598	24.0387	25.1109	19.4961		TOB2	1.0075	1.05244	0.817112
KIAA1161	7.24151	7.24151	15.8792	24.8302	12.7135		KIAA1161	2.19281	3.42887	1.75564
WDR7	0.90664	0.90664	0.58188	1.83227	3.97934		WDR7	0.641798	2.02095	4.38911
LOC100291317	20.6289	20.6289	36.3	51.4719	53.4732		LOC100291317	1.75967	2.49513	2.59215
PDSS2	0	1	4.36973	0	7.96896		PDSS2	4.36973	0	7.96896
PPP3R1	155.457	155.457	186.337	187.36	197.114		PPP3R1	1.19864	1.20522	1.26797
CRHR2	0	1	0	0	0		CRHR2	0	0	0
EXO1	6.55891	6.55891	8.1559	14.9121	20.8448		EXO1	1.24348	2.27357	3.17808
NIPA2	17.5064	17.5064	33.5624	32.6522	29.1203		NIPA2	1.91715	1.86515	1.6634
TOPBP1	2.71987	2.71987	8.39708	9.69438	6.87775		TOPBP1	3.08731	3.56428	2.52871
LPO	39.897	39.897	82.42	223.622	120.839		LPO	2.06582	5.60498	3.02878
MESDC1	6.49212	6.49212	22.4865	40.2956	19.0758		MESDC1	3.46366	6.20684	2.9383
PARN	1.2666	1.2666	6.50726	8.95904	7.22701		PARN	5.13759	7.07332	5.70585
CCDC138	0	1	0.674072	2.12258	1.84393		CCDC138	0.674072	2.12258	1.84393
CHML	0.942925	0.942925	8.08887	5.6602	9.8343		CHML	8.57849	6.00282	10.4296
C17orf62	0	1	1.71731	10.8152	0.782954		C17orf62	1.71731	10.8152	0.782954
IFI6	232.578	232.578	260.417	247.285	219.006		IFI6	1.1197	1.06323	0.941646
RPS6KB1	8.94104	8.94104	51.9019	63.457	82.9698		RPS6KB1	5.80491	7.09728	9.27966
YIPF5	63.3715	63.3715	139.653	167.432	137.817		YIPF5	2.20372	2.64208	2.17475
8-mrt	0.371699	0.371699	0.715668	0	0		8-mrt	1.92539	0	0
SERPINA9	1.32186	1.32186	2.52562	0.184	0		SERPINA9	1.91066	0.139198	0
PSMB2	247.136	247.136	466.642	541.236	581.377		PSMB2	1.8882	2.19003	2.35246
DAAM1	3.21505	3.21505	9.64607	5.24794	5.77475		DAAM1	3.00028	1.6323	1.79616
RAP2C	15.275	15.275	39.2223	45.6107	34.3085		RAP2C	2.56774	2.98597	2.24606
SH3YL1	13.0095	13.0095	20.0481	35.4935	21.9835		SH3YL1	1.54104	2.72828	1.68981
ITPA	28.6346	28.6346	57.5422	57.9655	91.6466		ITPA	2.00953	2.02432	3.20056
CAPN13	3.18062	3.18062	6.12394	0	4.88603		CAPN13	1.92539	0	1.53619
ZDHHC21	0	1	0	2.05389	0		ZDHHC21	0	2.05389	0
POLR3K	8.30967	8.30967	15.3328	14.6942	22.406		POLR3K	1.84517	1.76833	2.69638
TM9SF1	31.3603	31.3603	46.9323	44.2147	46.7339		TM9SF1	1.49655	1.4099	1.49023
LPHN2	4.26569	4.26569	7.78393	15.3172	29.7368		LPHN2	1.82478	3.59079	6.97116
C22orf39	84.7655	84.7655	136.525	144.748	167.555		C22orf39	1.61062	1.70763	1.97669
SFRP1	21.7299	21.7299	91.7549	58.8192	59.6318		SFRP1	4.22253	2.70684	2.74423
HNRNPAB	330.183	330.183	647.082	786.149	858.868		HNRNPAB	1.95977	2.38095	2.60119
SFRP2	16.4727	16.4727	128.136	69.6238	64.3688		SFRP2	7.77869	4.22663	3.90761
NIPAL2	0	1	0	0	0		NIPAL2	0	0	0
GOLIM4	1.21191	1.21191	3.3037	2.44308	4.25536		GOLIM4	2.72604	2.01589	3.51129
SHOC2	0.282053	0.282053	2.98142	0	3.99366		SHOC2	10.5704	0	14.1593
EFHD2	50.9333	50.9333	117.649	96.6495	59.2479		EFHD2	2.30987	1.89757	1.16325
MMP28	3.83032	3.83032	7.37487	6.96678	4.0348		MMP28	1.92539	1.81885	1.05339
DNAJC2	59.7051	59.7051	170.1	209.791	164.063		DNAJC2	2.84901	3.51379	2.7479
MPHOSPH6	9.34889	9.34889	25.4487	23.2046	32.0648		MPHOSPH6	2.72211	2.48207	3.42979
SEC11C	485.62	485.62	405.822	362.742	327.662		SEC11C	0.835678	0.746967	0.674728
FIP1L1	33.6483	33.6483	94.2061	124.343	89.4706		FIP1L1	2.79973	3.69538	2.65899
FNDC3A	0.442375	0.442375	0.851745	0.670512	0.970816		FNDC3A	1.92539	1.51571	2.19456
CERKL	0.854656	0.854656	0.822775	0	0.375118		CERKL	0.962697	0	0.438911
RBAK	1.37413	1.37413	7.9372	0	0		RBAK	5.77618	0	0
CTSC	53.2756	53.2756	140.56	132.394	123.469		CTSC	2.63835	2.48507	2.31755
CYHR1	0	1	0	1.77258	1.53988		CYHR1	0	1.77258	1.53988
GTF2A2	52.0921	52.0921	50.7394	59.7992	57.5878		GTF2A2	0.974032	1.14795	1.1055
NCK1	40.6734	40.6734	52.7529	51.3671	53.5809		NCK1	1.29699	1.26292	1.31734
NEO1	1.46194	1.46194	2.34568	8.86354	6.13145		NEO1	1.6045	6.06284	4.19404
NXF1	0	1	2.25169	0	1.02659		NXF1	2.25169	0	1.02659
FZD10	0	1	0	0	0.611722		FZD10	0	0	0.611722
LSM7	44.4948	44.4948	59.183	78.1843	84.9799		LSM7	1.33011	1.75716	1.90989
TNFRSF21	2.39693	2.39693	11.1994	12.1445	2.87259		TNFRSF21	4.67238	5.0667	1.19845
NT5C3L	22.5416	22.5416	41.003	53.704	69.6493		NT5C3L	1.81899	2.38244	3.08981
LMBR1L	1.76673	1.76673	6.4915	7.14095	4.99555		LMBR1L	3.67429	4.0419	2.82756
ZNF776	28.1035	28.1035	16.296	9.53491	23.4259		ZNF776	0.579857	0.339278	0.833556
FAM134C	71.5902	71.5902	142.084	146.203	132.719		FAM134C	1.98468	2.04222	1.85387
DDHD1	4.12157	4.12157	8.67962	12.4942	12.5409		DDHD1	2.1059	3.03142	3.04275
KLRF1	2.09142	2.09142	4.27344	0	1.83589		KLRF1	2.04332	0	0.877822
KRT16	0	1	1.3347	0	0		KRT16	1.33469	0	0
KIF2A	2.74607	2.74607	6.24291	12.8534	7.44406		KIF2A	2.2734	4.68067	2.71081
BCAT2	0.41918	0.41918	4.43898	3.81214	3.31169		BCAT2	10.5897	9.09426	7.9004
LOC100134730	27.2895	27.2895	72.5665	69.815	64.2299		LOC100134730	2.65914	2.55831	2.35365
C15orf42	3.09418	3.09418	12.9656	16.0505	13.931		C15orf42	4.1903	5.18732	4.50232
ZNF696	1.15043	1.15043	0	3.87493	1.12208		ZNF696	0	3.36825	0.975358
YWHAB	554.673	554.673	948.579	1029.53	972.177		YWHAB	1.71016	1.8561	1.7527
KDELC1	8.61878	8.61878	9.08362	13.0586	19.6867		KDELC1	1.05393	1.51513	2.28416
SNIP1	17.6104	17.6104	50.8896	62.9627	59.3767		SNIP1	2.88975	3.57531	3.37168
TSHZ1	7.10432	7.10432	9.0081	14.1686	17.4338		TSHZ1	1.26797	1.99436	2.45398
BNIPL	0	1	1.82859	0	0.833685		BNIPL	1.82858	0	0.833685
TCEB2	88.6948	88.6948	126.774	142.663	153.962		TCEB2	1.42933	1.60847	1.73586
RNF125	6.87774	6.87774	18.8517	42.4783	36.8705		RNF125	2.74097	6.17621	5.36084
SLBP	58.6015	58.6015	135.128	151.106	199.301		SLBP	2.30588	2.57853	3.40095
PLEKHG4	1.08842	1.08842	2.09563	0	0		PLEKHG4	1.92539	0	0
ZNF703	100.957	100.957	95.9711	193.166	122.13		ZNF703	0.950613	1.91335	1.20972
TNFRSF1B	0	1	0	0	1.71554		TNFRSF1B	0	0	1.71554
ERP44	154.871	154.871	146.74	152.824	190.737		ERP44	0.947498	0.98678	1.23158
DIP2A	1.53391	1.53391	0.49223	3.09995	2.24865		DIP2A	0.320899	2.02095	1.46596
MIS12	13.0809	13.0809	17.4364	39.6538	29.1485		MIS12	1.33296	3.03142	2.22832
TUFT1	0.461891	0.461891	5.33593	4.20056	0.810917		TUFT1	11.5524	9.09426	1.75564
INTS6	0.329378	0.329378	5.39056	6.9894	5.78272		INTS6	16.3658	21.22	17.5565
IFT122	1.59753	1.59753	2.69139	1.2107	5.25881		IFT122	1.68472	0.757855	3.29183
RPA3	50.1306	50.1306	83.6429	104.687	134.523		RPA3	1.6685	2.0883	2.68345
TOMM40	14.1202	14.1202	63.2812	69.432	49.9767		TOMM40	4.48161	4.91721	3.53937
TMEM119	15.6595	15.6595	34.1644	48.3777	31.0248		TMEM119	2.18171	3.08935	1.98121
NUP62	12.1019	12.1019	25.8087	32.7614	27.33		NUP62	2.13262	2.70713	2.25833
CIAO1	32.7717	32.7717	36.8713	55.462	62.2895		CIAO1	1.12509	1.69237	1.90071
LRRN1	0.887509	0.887509	0.405951	0.479937	4.18068		LRRN1	0.457405	0.540768	4.71058
CHMP2B	42.6836	42.6836	61.0073	73.1272	56.4024		CHMP2B	1.42929	1.71324	1.32141
USP15	13.4514	13.4514	16.5979	20.6006	31.5815		USP15	1.23391	1.53148	2.34782
SPAG6	4.15291	4.15291	15.3434	10.9133	7.44905		SPAG6	3.69461	2.62786	1.79369
CISD2	10.6653	10.6653	12.5969	19.5333	21.4921		CISD2	1.18111	1.83148	2.01515
EIF4G2	191.826	191.826	354.063	468.213	406.565		EIF4G2	1.84575	2.44082	2.11945
C16orf63	1.86322	1.86322	6.14989	10.4895	9.28307		C16orf63	3.30068	5.62978	4.98227
ARL13B	0.488578	0.488578	0.470353	0	1.28665		ARL13B	0.962697	0	2.63347
PPP1R12C	2.17069	2.17069	4.7765	3.22434	3.53875		PPP1R12C	2.20045	1.4854	1.63024
HNRNPH3	1674.98	1674.98	1963.66	2786.6	3327.44		HNRNPH3	1.17235	1.66366	1.98656
TOR1AIP1	34.2167	34.2167	71.8938	109.835	105.796		TOR1AIP1	2.10113	3.21	3.09196
POLDIP3	10.338	10.338	16.1431	17.2147	16.5873		POLDIP3	1.56153	1.66519	1.60451
UEVLD	0	1	5.63172	5.91121	0.855868		UEVLD	5.63172	5.91121	0.855868
TMEM138	0	1	0.841585	7.95016	5.75541		TMEM138	0.841585	7.95016	5.75541
BANF1	107.183	107.183	161.908	227.692	291.426		BANF1	1.51057	2.12432	2.71895
GTPBP8	1.89944	1.89944	7.31434	5.758	20.9338		GTPBP8	3.85079	3.03142	11.0211
SNX18	25.9666	25.9666	75.6601	98.1309	66.4929		SNX18	2.91375	3.77913	2.56071
TMBIM4	100.043	100.043	167.582	146.109	112.936		TMBIM4	1.6751	1.46046	1.12887
RAB3GAP1	9.48181	9.48181	14.922	21.512	15.2816		RAB3GAP1	1.57375	2.26876	1.61168
IKZF2	46.8774	46.8774	40.3688	57.2687	44.6784		IKZF2	0.861156	1.22167	0.953089
HDAC1	49.7947	49.7947	109.752	132.533	147.655		HDAC1	2.20408	2.66159	2.96527
COL3A1	352.756	352.756	834.147	845.874	372.19		COL3A1	2.36465	2.3979	1.05509
PLAG1	3.82531	3.82531	1.22346	0	2.23119		PLAG1	0.319833	0	0.583271
SLC10A7	1.31949	1.31949	6.66892	6.99988	9.5558		SLC10A7	5.05416	5.30499	7.24203
GNMT	1412.09	1412.09	221.576	141.182	549.944		GNMT	0.156913	0.099981	0.389454
LOC652455	1.20485	1.20485	11.7676	6.24345	4.095		LOC652455	9.76685	5.18192	3.39875
TMEM64	2.78011	2.78011	4.46067	7.02306	7.72806		TMEM64	1.6045	2.52618	2.77977
C17orf101	2.61738	2.61738	1.25987	0	3.4464		C17orf101	0.481349	0	1.31673
USP16	5.73951	5.73951	16.578	15.7039	14.9588		USP16	2.8884	2.7361	2.60628
DENND4C	0.413465	0.413465	4.17944	6.89363	5.08129		DENND4C	10.1083	16.6728	12.2895
WTAP	15.4729	15.4729	36.4051	40.3567	48.2654		WTAP	2.35283	2.60822	3.11935
ARL6IP4	6.41927	6.41927	14.6197	10.9251	10.8675		ARL6IP4	2.27747	1.70193	1.69294
RELA	1.20471	1.20471	6.95864	0	0		RELA	5.77618	0	0
TCF12	62.3682	62.3682	110.712	204.962	229.41		TCF12	1.77513	3.28633	3.67832
GGCX	3.42639	3.42639	10.4961	9.00193	12.6627		GGCX	3.0633	2.62723	3.69563
CTDSP1	0	1	1.6765	0	0.382175		CTDSP1	1.6765	0	0.382175
INSM1	2.24839	2.24839	0.309217	0	1.12782		INSM1	0.137528	0	0.501613
GRAMD4	0.527243	0.527243	3.55302	1.59829	1.38848		GRAMD4	6.73888	3.03142	2.63347
IL1B	9.71461	9.71461	15.3698	20.347	13.6715		IL1B	1.58213	2.09447	1.40732
C10orf78	8.0355	8.0355	18.3853	24.359	21.2082		C10orf78	2.28801	3.03142	2.63932
TSNAX	13.7906	13.7906	37.0689	57.6423	57.5865		TSNAX	2.68799	4.17983	4.17578
EIF2A	31.5926	31.5926	65.2248	63.7848	82.9139		EIF2A	2.06456	2.01898	2.62448
PPPDE2	0	1	15.5822	21.8074	13.4191		PPPDE2	15.5822	21.8074	13.4191
SULT1C2	33.2647	33.2647	34.5087	56.8912	55.5366		SULT1C2	1.0374	1.71026	1.66954
SESTD1	5.22482	5.22482	9.0523	8.33644	18.2101		SESTD1	1.73256	1.59555	3.4853
BCAN	4.43585	4.43585	74.742	14.6489	14.2097		BCAN	16.8495	3.30238	3.20339
AP1AR	27.9681	27.9681	51.917	52.7539	60.2891		AP1AR	1.85629	1.88622	2.15564
NTF3	10.7255	10.7255	18.1549	14.7453	27.7542		NTF3	1.69269	1.37479	2.58769
ZNF518B	1.17415	1.17415	1.67575	5.33903	5.92651		ZNF518B	1.4272	4.54713	5.04748
KLHL20	0.711138	0.711138	7.11539	12.9346	9.46159		KLHL20	10.0056	18.1885	13.3049
CCDC90A	2.47034	2.47034	4.93474	11.233	4.70207		CCDC90A	1.9976	4.54713	1.90341
SMYD5	7.45714	7.45714	31.6482	30.9667	31.7927		SMYD5	4.24402	4.15263	4.2634
PKP4	34.8776	34.8776	30.4716	38.5749	37.6605		PKP4	0.873673	1.10601	1.07979
GORASP1	1.7617	1.7617	12.4553	11.749	8.96637		GORASP1	7.07005	6.66913	5.08961
C12orf29	3.30272	3.30272	7.04911	9.34603	15.5549		C12orf29	2.13434	2.8298	4.70972
TSPAN5	0.808501	0.808501	5.77479	3.95308	2.97625		TSPAN5	7.14259	4.88939	3.68119
DIABLO	8.8201	8.8201	16.6111	17.8027	19.9764		DIABLO	1.88333	2.01843	2.26488
ODC1	55.5697	55.5697	140.381	118.237	135.741		ODC1	2.52621	2.12772	2.44272
RIOK1	7.17349	7.17349	28.3335	22.1476	20.5706		RIOK1	3.94975	3.08743	2.86758
CREM	5.14293	5.14293	11.3875	7.79519	6.31589		CREM	2.2142	1.51571	1.22807
CNOT6L	3.30709	3.30709	14.3527	14.8521	15.4829		CNOT6L	4.33998	4.49099	4.68172
BUD13	4.07729	4.07729	9.01588	12.36	7.14451		BUD13	2.21124	3.03142	1.75227
ESCO1	3.48064	3.48064	5.58466	10.5513	13.24		ESCO1	1.6045	3.03142	3.8039
LTA4H	21.5048	21.5048	64.2523	98.9189	89.9988		LTA4H	2.98781	4.59985	4.18505
SAMHD1	1.74216	1.74216	10.7339	15.8436	14.3724		SAMHD1	6.16126	9.09426	8.24977
STX6	11.5017	11.5017	16.1832	21.4564	16.3097		STX6	1.40702	1.86549	1.41802
SFRS16	0.342195	0.342195	1.64715	2.07467	2.1027		SFRS16	4.81349	6.06284	6.14476
ZNF333	2.62676	2.62676	5.56331	11.148	10.533		ZNF333	2.11793	4.24399	4.00989
URGCP	1.48806	1.48806	5.73019	3.94706	5.92547		URGCP	3.85079	2.65249	3.98202
CNPY3	51.5888	51.5888	74.3636	64.1808	78.5975		CNPY3	1.44147	1.24408	1.52354
KLHL11	2.60851	2.60851	2.51121	1.12964	3.2777		KLHL11	0.962697	0.43306	1.25654
[truncated: 9,929 more rows]

## Sheet: 2. Matrisome genes
Collagen	Gene Name	D5 Fold	D10 fold	D14 fold		Core matrisome - ECM glycoproteins	Gene Name	D5 Fold	D10 fold	D14 fold		Core matrisome - Proteoglycans	Gene Name	D5 Fold	D10 fold	D14 fold		Matrisome associated - ECM affiliated	Gene Name	D5 Fold	D10 fold	D14 fold		Matrisome associated - secreted factors	Gene Name	D5 Fold	D10 fold	D14 fold		Matrisome associated - regulators	Gene Name	D5 Fold	D10 fold	D14 fold
Col1a1	collagen, type I, alpha 1	-3.50759	-4.64076	-6.19049		Sparc	secreted acidic cysteine rich glycoprotein	-2.0992	-2.78964	-3.94573		Lum	lumican	-1.01446	-1.39599	-1.27235		Anxa3	annexin A3	1.00129	-1.03695	-1.28076		S100a11	S100 calcium binding protein A11 (calgizzarin)	-1.09695	-1.31408	-1.47739		Cstb	cystatin B	1.07506	1.4692	1.00869
Col1a2	collagen, type I, alpha 2	-2.31734	-2.90156	-3.76727		Dpt	dermatopontin	-1.7605	-5.67494	-9.83584		Dcn	decorin	-1.39202	-1.46839	-1.88534		Lgals4	lectin, galactose binding, soluble 4	1.03274	-1.20168	-1.37731		S100a2	S100 calcium binding protein A2	-1.85942	-4.20094	-3.56825		Serpinf1	serine (or cysteine) peptidase inhibitor, clade F, member 1	-2.78345	-4.75526	-4.47224
Col6a1	collagen, type VI, alpha 1	-1.98069	-2.44312	-1.38395		Mgp	matrix Gla protein	-1.33179	-1.61192	-1.86426		Ogn	osteoglycin	-2.98268	-2.47924	-1.55091		Anxa4	annexin A4	-1.17805	1.00802	-1.19835		S100a10	S100 calcium binding protein A10 (calpactin)	-1.5782	-1.51068	-1.33869		Cst3	cystatin C	-1.55966	-2.55447	-2.62651
Col17a1	collagen, type XVII, alpha 1	1.21516	-1.52129	-2.33338		Dspp	dentin sialophosphoprotein	-1.56837	-1.01798	-1.38726		Srgn	serglycin	3.14602	1.7164	1.11509		Itln1	intelectin 1 (galactofuranose binding)	2.91459	2.71565	-1.01235		S100a4	S100 calcium binding protein A4	-3.37717	-61.4437	-2.83321		Ctsh	cathepsin H	-2.27399	-4.97972	-8.4028
Col3a1	collagen, type III, alpha 1	2.36465	2.3979	1.05509		Srpx2	sushi-repeat-containing protein, X-linked 2	-1.09519	-1.64573	-2.38424		Bgn	biglycan	1.40888	1.35219	1.27278		Lgals1	lectin, galactose binding, soluble 1	2.01398	1.65452	1.41936		S100a16	S100 calcium binding protein A16	-1.18218	1.15824	1.19803		Ctsb	cathepsin B	2.25991	2.22138	2.15615
Col11a1	collagen, type XI, alpha 1	-2.35432	-1.37807	-1.18635		Ctgf	connective tissue growth factor	-1.6827	-5.50419	-9.08132		Kera	keratocan	1.40847	2.71465	2.16608		Anxa11	annexin A11	1.11681	1.05567	-1.00625		Vwc2l	von Willebrand factor C domain-containing protein 2-like	1.47615	1.48844	1.61791		Serpinb5	serine (or cysteine) peptidase inhibitor, clade B, member 5	1.70351	1.68714	1.3876
Col2a1	collagen, type II, alpha 1	-1.9563	-1.09701	1.46954		Spp1	secreted phosphoprotein 1	-1.76875	1.19497	-2.54738		Vcan	versican	3.82008	5.98495	4.42251		Lgals3	lectin, galactose binding, soluble 3	1.20995	1.33297	-1.01337		S100a13	S100 calcium binding protein A13	1.35795	2.38655	1.12199		Adam10	a disintegrin and metallopeptidase domain 10	1.31906	1.59667	1.35399
Col5a1	collagen, type V, alpha 1	-1.24225	-1.45834	-1.64666		Adipoq	adiponectin, C1Q and collagen domain containing	-3.22234	-25.4144	-40.5379		Prg2	proteoglycan 2, bone marrow	4.71805	1.05441	-1.12985		Anxa5	annexin A5	1.28081	-1.10334	-1.36594		Fstl1	follistatin-like 1	2.28753	3.99629	4.90766		Ctss	cathepsin S	-1.13864	-2.69697	-4.0618
Col5a2	collagen, type V, alpha 2	-1.2365	-1.12513	-1.40579		Spon2	spondin 2, extracellular matrix protein	-1.10959	-4.25099	-3.65554		Hapln3	hyaluronan and proteoglycan link protein 3	1.50531	1.43304	1.48607		Anxa1	annexin A1	1.37669	1.31571	1.08599		Fgfbp1	fibroblast growth factor binding protein 1	1.16323	1.44872	-1.1752		Serpinh1	serine (or cysteine) peptidase inhibitor, clade H, member 1	-1.0705	1.16578	-1.47087
Col4a5	collagen, type IV, alpha 5	1.29879	1.70468	1.17102		Igfbp2	insulin-like growth factor binding protein 2	-5.91637	-1.43275	-1.22134		Spock3	sparc/osteonectin, cwcv and kazal-like domains proteoglycan 3	1.52007	-2.68741	-1.97039		Anxa2	annexin A2	1.49923	1.30139	1.221		Ccl28	chemokine (C-C motif) ligand 28	-4.18944	-5.05571	-8.72956		Serpine2	serine (or cysteine) peptidase inhibitor, clade E, member 2	1.26447	1.52868	1.53965
Col6a3	collagen, type VI, alpha 3	-1.25463	-1.74947	-1.51788		Vwa5a	von Willebrand factor A domain containing 5A	-1.09093	1.14622	1.48127		Hspg2	perlecan (heparan sulfate proteoglycan 2)	-1.02028	-1.0592	1.02599		Clec3b	C-type lectin domain family 3, member b	-1.15799	-2.51045	-5.9788		Areg	amphiregulin	1.78649	1.83301	1.974		Ctsk	cathepsin K	2.9449	11.1144	7.14925
Col6a2	collagen, type VI, alpha 2	2.25654	1.9339	2.39494		Mfap5	microfibrillar associated protein 5	-1.70588	-3.45839	-9.57739		Ncan	neurocan	8.04902	-1.70465	1.96416		Anxa7	annexin A7	1.60143	1.79895	1.7207		Cxcl10	chemokine (C-X-C motif) ligand 10	-1.97697	-19.4628	-1.64131		Ctsg	cathepsin G	-1.08314	-2.48618	-9.65884
Col12a1	collagen, type XII, alpha 1	1.26375	1.32372	-1.06309		Crispld2	cysteine-rich secretory protein LCCL domain containing 2	1.46187	-3.84314	-3.76722		Acan	aggrecan	3.20046	-1.0798	1.6047		Clec2d	C-type lectin domain family 2, member d	-1.36355	-2.00602	-1.68899		Mdk	midkine	5.72058	8.67968	8.13562		Tgm3	transglutaminase 3, E polypeptide	18.2307	21.9976	9.73527
Col4a1	collagen, type IV, alpha 1	-3.00947	-3.57381	-2.59855		Mfap2	microfibrillar-associated protein 2	2.26322	4.24774	3.31491		Bcan	brevican	16.8495	3.30238	3.20339		Anxa6	annexin A6	-1.39685	-1.60685	-1.59418		Cxcl11	chemokine (C-X-C motif) ligand 11	1.2092	-5.97486	-4.0677		Htra1	HtrA serine peptidase 1	-1.14421	-1.97188	-2.57105
Col8a1	collagen, type VIII, alpha 1	-7.89449	-6.26769	-2.16445		Fbln5	fibulin 5	-1.39164	-2.93334	-2.13008		Optc	opticin	2.07117	4.44753	8.15372		Sftpc	surfactant associated protein C	-1.08069	-2.88791	-2.91175		Fgf7	fibroblast growth factor 7	1.99376	2.12005	1.85064		Tgm6	transglutaminase 6	12.3267	16.2373	6.75477
Col9a1	collagen, type IX, alpha 1	-1.48406	-1.50488	5.50722		Postn	periostin, osteoblast specific factor	1.29104	4.81322	4.48857		Prg4	proteoglycan 4 (megakaryocyte stimulating factor, articular superficial zone protein)	27.1728	4.3922	1.80873		Sdc2	syndecan 2	1.21922	-1.09877	-1.27385		Crlf1	cytokine receptor-like factor 1	1.15524	1.6976	3.28973		F10	coagulation factor X	-1.88246	-2.35009	-1.58882
Col24a1	collagen, type XXIV, alpha 1	1.16427	1.66319	1.4423		Crim1	cysteine rich transmembrane BMP regulator 1 (chordin like)	-1.43653	-1.29257	-2.20158		Prelp	proline arginine-rich end leucine-rich repeat	1.92539	0	1.21139		Muc2	mucin 2	1.52268	2.47376	1.32586		Ccl5	chemokine (C-C motif) ligand 5	-1.55812	-6.92744	-1.19614		Ctsc	cathepsin C	2.63835	2.48507	2.31755
Col7a1	collagen, type VII, alpha 1	1.80362	1.78323	1.20841		Thbs3	thrombospondin 3	-1.23315	1.00217	1.28906		Aspn	asporin	6.73888	0	1.58886		C1qtnf1	C1q and tumor necrosis factor related protein 1	-3.28747	-3.23644	-1.84736		Angptl2	angiopoietin-like 2	2.91069	1.90073	1.30105		Cst6	cystatin E/M	1.05938	-1.24014	-1.23422
Col9a2	collagen, type IX, alpha 2	-1.03175	-1.10525	2.99182		Pcolce2	procollagen C-endopeptidase enhancer 2	-1.11116	-1.14354	-1.79871		Epyc	epiphycan	-1.12091	1.40461	4.88088		Lman1	lectin, mannose-binding, 1	1.41804	1.99383	1.77067		Pdgfa	platelet derived growth factor, alpha	-1.21387	1.12714	1.0868		Ctsd	cathepsin D	1.85773	1.7622	1.81218
Col4a2	collagen, type IV, alpha 2	-1.76136	-3.21631	-2.49596		Cthrc1	collagen triple helix repeat containing 1	1.93936	3.78008	3.15243		Hapln1	hyaluronan and proteoglycan link protein 1	1.44642	0	3.07742		Lgals9	lectin, galactose binding, soluble 9	3.90755	2.35296	1.84436		Sfrp1	secreted frizzled-related protein 1	4.22253	2.70684	2.74423		Timp1	tissue inhibitor of metalloproteinase 1	7.56777	4.36115	1.2886
Col28a1	collagen, type XXVIII, alpha 1	2.57521	1.86649	2.48559		Nid2	nidogen 2	-1.24149	1.24216	1.5723		Omd	osteomodulin	0	5.28264	0.7926		Sema4f	sema domain, immunoglobulin domain (Ig), TM domain, and short cytoplasmic domain	-1.07283	-1.22288	-1.77993		Hbegf	heparin-binding EGF-like growth factor	-2.35438	-4.47865	-2.72935		P4ha1	procollagen-proline, 2-oxoglutarate 4-dioxygenase (proline 4-hydroxylase), alpha 1 polypeptide	1.10239	2.10384	1.87756
Col4a6	collagen, type IV, alpha 6	3.97159	4.18179	2.75765		Creld2	cysteine-rich with EGF-like domains 2	2.64996	2.64438	2.74759								C1qc	complement component 1, q subcomponent, C chain	2.20822	1.80821	1.41666		Sfrp2	secreted frizzled-related protein 2	7.77868	4.22663	3.90761		Plau	plasminogen activator, urokinase	1.85322	-1.05455	-1.79659
Col9a3	collagen, type IX, alpha 3	-1.16097	-1.05092	7.09658		Thbs4	thrombospondin 4	1.80873	3.39322	2.8969								Muc4	mucin 4	-1.11891	1.06096	-1.0769		Ntf3	neurotrophin 3	1.69269	1.37479	2.58769		P4ha2	procollagen-proline, 2-oxoglutarate 4-dioxygenase (proline 4-hydroxylase), alpha II polypeptide	-1.24025	-1.14249	-1.23361
Col18a1	collagen, type XVIII, alpha 1	2.03924	3.36751	2.43386		Papln	papilin, proteoglycan-like sulfated glycoprotein	-1.38853	-1.2617	-1.42246								C1qb	complement component 1, q subcomponent, beta polypeptide	2.61891	1.82574	1.53526		Il1b	interleukin 1 beta	1.58213	2.09447	1.40732		Serpini1	serine (or cysteine) peptidase inhibitor, clade I, member 1	-1.20935	-1.14114	-1.12168
Col13a1	collagen, type XIII, alpha 1	3.42059	4.63443	2.6958		Gldn	gliomedin	-2.50042	-5.55845	-22.3944								Gpc1	glypican 1	1.24181	-1.24688	-1.51893		Angptl7	angiopoietin-like 7	0.549485	0.519656	0.200416		Mmp2	matrix metallopeptidase 2	6.45687	7.39435	4.60345
Col14a1	collagen, type XIV, alpha 1	-9.34873	0	0		Tnxb	tenascin XB	-3.49062	-10.0063	-20.6917								Sdc1	syndecan 1	6.56179	5.83671	3.79252		Figf	c-fos induced growth factor	3.04533	6.06537	4.96043		Ctsz	cathepsin Z	3.37686	3.02704	2.66603
Col6a6	collagen, type VI, alpha 6	3.20899	2.6946	2.4384		Vit	vitrin	-1.2887	-1.38679	-1.38365								Sema4d	sema domain, immunoglobulin domain (Ig), transmembrane domain (TM) and short cytoplasmic domain, (semaphorin) 4D	1.22943	1.39361	2.32368		Egfl6	EGF-like-domain, multiple 6	1.09522	3.23052	4.57367		Adam17	a disintegrin and metallopeptidase domain 17	1.52127	1.8819	1.75696
Col22a1	collagen, type XXII, alpha 1	-2.0775	0	-4.55673		Thsd4	thrombospondin, type I, domain containing 4	1.54735	-1.22352	1.39933								Colec12	collectin sub-family member 12	2.03461	2.4565	1.74036		Cxcl12	chemokine (C-X-C motif) ligand 12	-1.35839	-3.08012	-1.03412		Ctso	cathepsin O	-1.13342	-2.07701	-1.5621
Col8a2	collagen, type VIII, alpha 2	1.92539	0	0		Pxdn	peroxidasin homolog (Drosophila)	2.09638	3.82123	4.22705								Parm1	prostate androgen-regulated mucin-like protein 1	1.62363	2.20013	1.59499		Bmp7	bone morphogenetic protein 7	1.73227	2.10378	2.02388		Lepre1	leprecan 1	1.89922	2.77678	2.16571
Col11a2	collagen, type XI, alpha 2	3.09154	0	-1.20079		Fgl1	fibrinogen-like protein 1	-1.11094	-1.39965	-1.24541								C1ql2	complement component 1, q subcomponent-like 2	1.56533	2.7109	-1.35012		Ccl24	chemokine (C-C motif) ligand 24	19.2871	7.07332	2.14579		Sulf2	sulfatase 2	3.31118	3.02847	1.80461
Col16a1	collagen, type XVI, alpha 1	-2.40363	1.31005	-2.63604		Fn1	fibronectin 1	3.06582	2.33381	1.26799								Sdc4	syndecan 4	2.52364	1.71385	1.10294		Bmp2	bone morphogenetic protein 2	2.57313	2.00735	1.01342		Fam20c	family with sequence similarity 20, member c	-1.73104	1.27228	-1.61365
Col20a1	collagen, type XX, alpha 1	0	0	-1.39639		Tgfbi	transforming growth factor, beta induced	5.99462	10.8562	15.1187								Sema6a	sema domain, transmembrane domain (TM), and cytoplasmic domain, (semaphorin) 6A	1.31185	2.44217	2.71951		Ctf1	cardiotrophin 1	1.23653	4.0419	2.63347		Ctsa	cathepsin A	2.5916	3.12027	3.43391
Col23a1	collagen, type XXIII, alpha 1	2.57336	0	-1.70468		Tnfaip6	tumor necrosis factor alpha induced protein 6	2.48004	1.64007	-1.26313								Muc15	mucin 15	2.4229	3.05864	2.29672		Angptl1	angiopoietin-like 1	-3.11624	-1.48445	1.95072		Serpinb10	serine (or cysteine) peptidase inhibitor, clade B (ovalbumin), member 10	7.41835	3.41065	2.12813
Col25a1	collagen, type XXV, alpha 1	7.96833	21.9549	17.2563		Matn2	matrilin 2	-2.10075	-4.51603	-4.40357								Gpc4	glypican 4	3.17861	2.065	3.17912		Fst	follistatin	-2.80462	-2.22668	-1.39809		Itih5	inter-alpha (globulin) inhibitor H5	-2.3695	-6.7724	-3.8979
Col5a3	collagen, type V, alpha 3	3.90755	0	5.9384		Thbs2	thrombospondin 2	2.93057	5.16871	5.39684								C1qa	complement component 1, q subcomponent, alpha polypeptide	8.12017	4.47855	3.02728		Crlf3	cytokine receptor-like factor 3	3.62427	2.49646	2.10471		Loxl1	lysyl oxidase-like 1	1.34369	1.46978	1.11723
						Igfbp3	insulin-like growth factor binding protein 3	1.97524	2.45261	1.01087								Sema6d	sema domain, transmembrane domain (TM), and cytoplasmic domain, (semaphorin) 6D	1.12065	-1.00885	1.54299		Tgfb1	transforming growth factor, beta 1	9.44767	8.33641	4.18666		Mmp14	matrix metallopeptidase 14 (membrane-inserted)	9.38738	8.85591	6.68713
						Lama2	laminin, alpha 2	-2.4885	-8.70494	-3.53591								Plxna4	plexin A4	1.00778	-1.99576	1.01566		Sfrp4	secreted frizzled-related protein 4	1.92539	1.89464	-1.13918		Timp3	tissue inhibitor of metalloproteinase 3	-2.38927	-1.24063	-1.1495
						Ltbp1	latent transforming growth factor beta binding protein 1	1.82988	2.95587	3.04448								Sema3d	sema domain, immunoglobulin domain (Ig), short basic domain, secreted, (semaphorin) 3D	-1.99232	-1.75752	1.11673		Fgf2	fibroblast growth factor 2	3.79182	3.03142	3.62102		Plod1	procollagen-lysine, 2-oxoglutarate 5-dioxygenase 1	2.83303	3.46764	3.7985
						Efemp2	epidermal growth factor-containing fibulin-like extracellular matrix protein 2	1.91989	2.91517	2.89267								Sftpd	surfactant associated protein D	11.3656	2.6007	1.55257		Wnt5b	wingless-related MMTV integration site 5B	4.86063	9.43967	5.71703		Mmp3	matrix metallopeptidase 3	5.29841	2.1679	1.24457
						Pcolce	procollagen C-endopeptidase enhancer protein	-1.16592	1.01075	-1.03142								C1qtnf6	C1q and tumor necrosis factor related protein 6	-1.73125	-1.64939	1.40452		Il17b	interleukin 17B	-2.77	1.13678	-3.03782		F13a1	coagulation factor XIII, A1 subunit	6.74503	13.0456	20.5673
						Vwde	von Willebrand factor D and EGF domains	3.22355	6.186	5.35836								Lgals8	lectin, galactose binding, soluble 8	1.04065	1.28459	-1.0614		Tgfb2	transforming growth factor, beta 2	3.56198	4.54713	1.66786		Plod2	procollagen lysine, 2-oxoglutarate 5-dioxygenase 2	1.177	-1.37149	2.57203
						Lama4	laminin, alpha 4	-1.99396	-2.59174	-1.56221								Clec11a	C-type lectin domain family 11, member a	1.53122	5.37063	6.3694		Angpt1	angiopoietin 1	2.11793	6.66913	5.4425		Egln1	EGL nine homolog 1 (C. elegans)	3.11967	3.21423	2.9668
						Fbn1	fibrillin 1	-1.24786	-7.33889	-6.7929								Sema5a	sema domain, seven thrombospondin repeats (type 1 and type 1-like), transmembrane domain (TM) and short cytoplasmic domain, (semaphorin) 5A	1.10532	2.02095	3.15658		Ereg	epiregulin	3.52989	3.03142	3.8039		A2m	alpha-2-macroglobulin	2.53597	2.09991	-1.16473
						Abi3bp	ABI gene family, member 3 (NESH) binding protein	-1.88304	-8.54187	-6.71936								Muc16	mucin 16	3.66258	5.02535	2.02807		Tnfsf10	tumor necrosis factor (ligand) superfamily, member 10	1.68622	2.34064	-1.21664		Serping1	serine (or cysteine) peptidase inhibitor, clade G, member 1	1.44646	4.55472	3.07751
						Igfbp5	insulin-like growth factor binding protein 5	2.46663	3.04144	1.86947								Sema3e	sema domain, immunoglobulin domain (Ig), short basic domain, secreted, (semaphorin) 3E	2.88809	2.18936	2.45059		Vegfc	vascular endothelial growth factor C	2.16607	0.757855	0.219456		Ogfod1	2-oxoglutarate and iron-dependent oxygenase domain containing 1	1.89777	2.54563	2.15063
						Fbn2	fibrillin 2	2.45037	3.00292	2.13796								Plxnb2	plexin B2	2.18223	3.03142	3.07128		Wnt5a	wingless-related MMTV integration site 5A	5.5919	6.06284	9.23971		Pcsk5	proprotein convertase subtilisin/kexin type 5	2.18094	2.76239	-1.43765
						Srpx	sushi-repeat-containing protein	3.0179	-1.08276	1.93991								Muc5b	mucin 5, subtype B, tracheobronchial	4.77059	3.01107	11.381		Hgfac	hepatocyte growth factor activator	0	6.06284	5.26693		Ogfod2	2-oxoglutarate and iron-dependent oxygenase domain containing 2	-1.93986	2.43488	-8.50969
						Gas6	growth arrest specific 6	2.40076	1.30496	1.46006								Clec3a	C-type lectin domain family 3, member a	-1.90437	-3.62866	-2.5062		Vwc2	von Willebrand factor C domain containing 2	0	0	-1.13918		Mmp19	matrix metallopeptidase 19	5.96568	4.13772	3.77489
						Nov	nephroblastoma overexpressed gene	2.19588	1.39106	-1.00979								Clec9a	C-type lectin domain family 9, member a	1.56179	0	-1.57559		Mst1	macrophage stimulating 1 (hepatocyte growth factor-like)	17.2126	8.52704	5.80248		Pamr1	peptidase domain containing associated with muscle regeneration 1	4.53616	4.78032	5.89593
						Lamc1	laminin, gamma 1	3.16036	3.74681	3.01633								C1qtnf3	C1q and tumor necrosis factor related protein 3	-5.19374	0	-5.69591		Pdgfd	platelet-derived growth factor, D polypeptide	1.43923	3.03142	2.41401		Masp2	mannan-binding lectin serine peptidase 2	4.10831	3.71349	2.83976
						Matn1	matrilin 1, cartilage matrix protein	-3.65667	-19.1956	-5.1627								Plxdc2	plexin domain containing 2	-6.23249	0	-1.70877		Hcfc2	host cell factor C2	2.30782	5.32823	5.01113		Serpinf2	serine (or cysteine) peptidase inhibitor, clade F, member 2	1.83543	-1.36664	-2.54125
						Fbln1	fibulin 1	1.76081	4.88561	10.4388								Lgals12	lectin, galactose binding, soluble 12	1.92402	3.06607	2.23719		Chrdl1	chordin-like 1	-2.0775	0	-6.8351		Ngly1	N-glycanase 1	2.90219	2.27357	2.76075
						Efemp1	epidermal growth factor-containing fibulin-like extracellular matrix protein 1	1.22852	1.23654	-2.26911								Cspg5	chondroitin sulfate proteoglycan 5	-2.59687	-1.64939	-1.89864		Megf6	multiple EGF-like-domains 6	4.67733	1.29918	2.79398		Loxl2	lysyl oxidase-like 2	2.52165	2.90065	3.01407
						Lamb1	laminin B1 subunit 1	2.18509	2.85894	2.31314								Plxnb3	plexin B3	2.36879	1.5214	2.02811		Fgf12	fibroblast growth factor 12	4.89807	1.26838	1.46916		Kazald1	Kazal-type serine peptidase inhibitor domain 1	105.821	119.387	52.6958
						Ecm2	extracellular matrix protein 2, female organ and adipocyte specific	1.47701	1.03174	1.14253								Plxnd1	plexin D1	4.93382	4.92606	4.91032		Fgf18	fibroblast growth factor 18	0	0	-1.13918		Adam9	a disintegrin and metallopeptidase domain 9 (meltrin gamma)	3.36382	2.63481	2.04752
						Slit2	slit homolog 2 (Drosophila)	1.65726	1.64196	1.14155								Frem1	Fras1 related extracellular matrix protein 1	1.48626	-1.42947	2.70099		Il16	interleukin 16	5.77618	1.01047	-1.70877		Mmp8	matrix metallopeptidase 8	37.8245	8.91818	2.41047
						Emilin2	elastin microfibril interfacer 2	1.43431	1.70538	1.57573								Cspg4	chondroitin sulfate proteoglycan 4	3.63487	2.59836	4.42673		Wif1	Wnt inhibitory factor 1	0	4.54713	7.9004		Mmp28	matrix metallopeptidase 28 (epilysin)	1.92539	1.81885	1.05339
						Coch	coagulation factor C homolog (Limulus polyphemus)	2.82347	-2.09016	-1.37062								Clec2l	C-type lectin domain family, member L	2.27003	1.79374	1.29855		Ngf	nerve growth factor	0	0	12.43		Adamts12	a disintegrin-like and metallopeptidase (reprolysin type) with thrombospondin type 1 motif, 12	-1.55812	-1.48445	-10.2526
						Vwf	Von Willebrand factor homolog	1.68397	1.83912	2.0394								Plxnc1	plexin C1	3.85079	6.06284	1.75564		Fgf14	fibroblast growth factor 14	1.92539	3.03142	0		Timp2	tissue inhibitor of metalloproteinase 2	7.35167	6.34551	7.76885
						Ltbp3	latent transforming growth factor beta binding protein 3	-1.10234	-1.00549	-1.13918								Sema5b	sema domain, seven thrombospondin repeats (type 1 and type 1-like), transmembrane domain (TM) and short cytoplasmic domain, (semaphorin) 5B	0	3.70272	0		Il34	interleukin 34	1.92539	3.03142	3.51129		Lox	lysyl oxidase	14.529	11.5194	1.58008
						Sned1	sushi, nidogen and EGF-like domains 1	2.75056	3.89754	2.9244								Clec4g	C-type lectin domain family 4, member g	4.81349	0	-1.13918		Fgf3	fibroblast growth factor 3	0	0	-1.13918		Serpinb8	serine (or cysteine) peptidase inhibitor, clade B, member 8	10.547	13.1444	8.51936
						Thbs1	thrombospondin 1	13.341	9.04215	3.42674								Frem2	Fras1 related extracellular matrix protein 2	32.2176	70.2412	25.9142		Cbln2	cerebellin 2 precursor protein	2.56719	2.02095	3.8039		Pzp	pregnancy zone protein	-1.29844	-1.64939	1.05339
						Spon1	spondin 1, (f-spondin) extracellular matrix protein	-1.08828	1.10049	1.56885								Sema3f	sema domain, immunoglobulin domain (Ig), short basic domain, secreted, (semaphorin) 3F	2.56719	1.01047	2.04825		Wnt3	wingless-related MMTV integration site 3	4.81349	0	-1.13918		Mmp16	matrix metallopeptidase 16	1.74859	2.14127	2.48022
						Ntn1	netrin 1	1.58451	1.48335	1.34524								Sema4b	sema domain, immunoglobulin domain (Ig), transmembrane domain (TM) and short cytoplasmic domain, (semaphorin) 4B	5.77618	3.03142	-1.13918		Wnt11	wingless-related MMTV integration site 11	-1.03875	0	-1.13918		Bmp1	bone morphogenetic protein 1	2.00927	2.27327	1.44815
						Bmper	BMP-binding endothelial regulator	-2.42375	-2.30915	-1.06324								Sema3a	sema domain, immunoglobulin domain (Ig), short basic domain, secreted, (semaphorin) 3A	2.2495	2.02095	4.0965		Wnt10a	wingless related MMTV integration site 10a	1.97088	0	-1.44676		Adamts5	a disintegrin-like and metallopeptidase (reprolysin type) with thrombospondin type 1 motif, 5 (aggrecanase-2)	-2.59687	-1.64939	-5.69591
						Cilp	cartilage intermediate layer protein, nucleotide pyrophosphohydrolase	1.12322	-1.04242	1.1336								Plxna2	plexin A2	3.35981	4.54713	3.28306		Megf11	multiple EGF-like-domains 11	25.0494	18.1885	10.5339		Adamts3	a disintegrin-like and metallopeptidase (reprolysin type) with thrombospondin type 1 motif, 3	1.78247	1.20694	-1.12542
						Wisp1	WNT1 inducible signaling pathway protein 1	1.40169	1.061	-2.27837								Plxnb1	plexin B1	1.44405	3.03142	4.82802		Nrg1	neuregulin 1	2.88809	0	2.63347		Sulf1	sulfatase 1	12.447	10.4511	4.977
						Lgi1	leucine-rich repeat LGI family, member 1	-2.15844	-7.91708	-1.13918								Sdc3	syndecan 3	5.16006	12.1257	9.65605		Inhbb	inhibin beta-B	3.85079	0	-1.13918		Timp4	tissue inhibitor of metalloproteinase 4	5.29483	3.03142	1.75564
						Lamb2	laminin, beta 2	-1.09703	-2.09033	-10.1671								Anxa9	annexin A9	1.20948	0	1.03729		Wfikkn2	WAP, follistatin/kazal, immunoglobulin, kunitz and netrin domain containing 2	2.74369	0	4.38911		Leprel1	leprecan-like 1	-1.55812	2.02095	-1.13918
						Igfbp7	insulin-like growth factor binding protein 7	-1.55812	0	-1.70877								Clec4e	C-type lectin domain family 4, member e	4.55473	1.11267	2.89981		Pdgfc	platelet-derived growth factor, C polypeptide	7.70158	3.03142	19.3121		Adam28	a disintegrin and metallopeptidase domain 28	7.23705	3.54888	1.2896
						Fgl2	fibrinogen-like protein 2	4.98465	1.51287	1.58643								Sema7a	sema domain, immunoglobulin domain (Ig), and GPI membrane anchor, (semaphorin) 7A	1.06314	-1.47564	0		Fgf10	fibroblast growth factor 10	11.5524	12.1257	13.1673		Tgm2	transglutaminase 2, C polypeptide	5.09588	0	2.48716
						Emilin3	elastin microfibril interfacer 3	-4.15499	0	-1.13918								Frem3	Fras1 related extracellular matrix protein 3	1.09688	1.73565	-1.32644		Fgfbp3	fibroblast growth factor binding protein 3	0	0	2.71491		F13b	coagulation factor XIII, beta subunit	2.34148	6.32231	4.37126
						Edil3	EGF-like repeats and discoidin I-like domains 3	5.55806	5.19672	2.23218								Hpx	hemopexin	2.91005	0	0		Cxcl14	chemokine (C-X-C motif) ligand 14	12.3033	24.2514	13.457		Mmp13	matrix metallopeptidase 13	34.3165	23.5877	8.08037
						Otog	otogelin	11.287	7.08175	6.99705								Sema4a	sema domain, immunoglobulin domain (Ig), transmembrane domain (TM) and short cytoplasmic domain, (semaphorin) 4A	1.14102	0	1.04042		Bmp5	bone morphogenetic protein 5	-3.15602	1.99548	1.15568		Serpina9	serine (or cysteine) peptidase inhibitor, clade A (alpha-1 antiproteinase, antitrypsin), member 9	1.91066	-7.18402	0
						Zpld1	zona pellucida like domain containing 1	-2.5387	0	1.4367								Plxna1	plexin A1	1.0539	-1.80798	2.2423		Wnt7a	wingless-related MMTV integration site 7A	1.70007	0	0		Cd109	CD109 antigen	1.44405	4.59071	2.06617
						Dmbt1	deleted in malignant brain tumors 1	0	-1.97927	-6.8351								Sema4c	sema domain, immunoglobulin domain (Ig), transmembrane domain (TM) and short cytoplasmic domain, (semaphorin) 4C	-1.14335	1.37704	0		Fgf13	fibroblast growth factor 13	0	0	-1.46634		Hyal3	hyaluronoglucosaminidase 3	1.92539	0	0
						Emilin1	elastin microfibril interfacer 1	11.6313	18.974	10.617								Sema4g	sema domain, immunoglobulin domain (Ig), transmembrane domain (TM) and short cytoplasmic domain, (semaphorin) 4G	0	0	-1.28499		Fgf8	fibroblast growth factor 8	1.17262	18.4623	13.9001		Hpse	heparanase	3.85079	0	0
						Ecm1	extracellular matrix protein 1	5.07486	3.80231	2.94074								Sema3c	sema domain, immunoglobulin domain (Ig), short basic domain, secreted, (semaphorin) 3C	-3.57415	0	-3.91973		Fgf9	fibroblast growth factor 9	-1.07248	0	1.70042		Adamts2	a disintegrin-like and metallopeptidase (reprolysin type) with thrombospondin type 1 motif, 2	-1.03875	0	-1.13918
						Mmrn1	multimerin 1	-1.86975	-2.9689	-10.2526														Gdf5	growth differentiation factor 5	0	3.66203	2.12086		Adamts1	a disintegrin-like and metallopeptidase (reprolysin type) with thrombospondin type 1 motif, 1	13.7714	5.30499	4.38911
						Tnc	tenascin C	20.9633	25.0393	12.3478														Hcfc1	host cell factor C1	1.2239	-2.0758	1.2555		Mep1b	meprin 1 beta	-1.03875	0	0
						Fbln2	fibulin 2	1.4057	0	-1.31029														Hgf	hepatocyte growth factor	-1.80243	0	-1.9767		P4ha3	procollagen-proline, 2-oxoglutarate 4-dioxygenase (proline 4-hydroxylase), alpha polypeptide III	4.86211	9.18613	1.77338
						Svep1	sushi, von Willebrand factor type A, EGF and pentraxin domain containing 1	2.54733	2.72419	1.31476														Hrnr	hornerin	7.90718	7.27868	0		Tll2	tolloid-like 2	3.85079	3.03142	2.63347
						Lamb3	laminin, beta 3	1.97888	2.18936	1.07289														Il10	interleukin 10	0	0	-1.01555		Plat	plasminogen activator, tissue	7.05978	2.02095	1.46304
						Slit3	slit homolog 3 (Drosophila)	-1.28508	2.62536	1.41303														Il11	interleukin 11	21.7347	5.6562	-1.83162		Adamts7	a disintegrin-like and metallopeptidase (reprolysin type) with thrombospondin type 1 motif, 7	1.92539	0	-2.27837
						Crispld1	cysteine-rich secretory protein LCCL domain containing 1	1.23775	-2.30915	1.25403														Tnfsf12	tumor necrosis factor (ligand) superfamily, member 12	6.6002	0	7.79359		Loxl3	lysyl oxidase-like 3	1.92539	3.03142	-1.13918
						Matn4	matrilin 4	1.60228	17.8773	45.2745														Lep	leptin	5.2586	22.7682	4.26154		Serpine1	serine (or cysteine) peptidase inhibitor, clade E, member 1	11.5524	3.03142	3.51129
						Cyr61	cysteine rich protein 61	2.3903	4.42631	4.36503														Megf8	multiple EGF-like-domains 8	0.494241	0	-4.43787		Mmp9	matrix metallopeptidase 9	66.162	17.5	20.5058
						Vwa1	von Willebrand factor A domain containing 1	-4.15499	-1.31951	-4.55673														Megf9	multiple EGF-like-domains 9	1.19244	0	0		Adamtsl2	ADAMTS-like 2	2.88809	12.1257	13.1673
						Dmp1	dentin matrix protein 1	8.98517	6.40373	-1.24411														S100a1	S100 calcium binding protein A1	6.28464	0	0		Mmp17	matrix metallopeptidase 17	1.92539	3.03142	1.75564
						Tsku	tsukushin	1.44405	1.51571	1.31673														S100b	S100 protein, beta polypeptide, neural	0	0	1.81924		Plod3	procollagen-lysine, 2-oxoglutarate 5-dioxygenase 3	4.81349	6.06284	7.9004
						Reln	reelin	-1.29844	-1.64939	2.10677														Scube2	signal peptide, CUB domain, EGF-like 2	-3.52454	0	-3.86532		St14	suppression of tumorigenicity 14 (colon carcinoma)	10.5849	4.54713	4.8368
						Lama3	laminin, alpha 3	-1.29973	0	-5.70161														Scube3	signal peptide, CUB domain, EGF-like 3	2.66909	1.68093	0		Mmp10	matrix metallopeptidase 10	81.7876	33.4053	3.79468
						Aebp1	AE binding protein 1	4.32955	3.73743	1.41693														Shh	sonic hedgehog	0	17.3778	8.42741		Astl	astacin-like metalloendopeptidase (M12 family)	32.6707	5.05237	2.04825
						Tecta	tectorin alpha	7.81138	12.3941	3.38179														Tgfb3	transforming growth factor, beta 3	5.5517	17.4817	3.79669		Adam15	a disintegrin and metallopeptidase domain 15 (metargidin)	0	4.01499	0
						Lama1	laminin, alpha 1	4.04858	7.69613	10.4922																				Tgm1	transglutaminase 1, K polypeptide	2.51227	3.95542	3.43617
						Rspo3	R-spondin 3 homolog (Xenopus laevis)	2.40674	0	1.31673																				Tgm5	transglutaminase 5	1.11448	16.962	4.91176
						Zp1	zona pellucida glycoprotein 1	3.31983	0	0																				Adam8	a disintegrin and metallopeptidase domain 8	9.23998	18.871	4.471
						Mfap4	microfibrillar-associated protein 4	1.92539	0	3.51129																				Adamts16	a disintegrin-like and metallopeptidase (reprolysin type) with thrombospondin type 1 motif, 16	-2.11425	0	1.29384
						Smoc2	SPARC related modular calcium binding 2	1.92539	0	5.26693																				Adamts17	a disintegrin-like and metallopeptidase (reprolysin type) with thrombospondin type 1 motif, 17	0	4.17861	0
						Zp1	zona pellucida glycoprotein 1	4.36365	0	0																				Adamts18	a disintegrin-like and metallopeptidase (reprolysin type) with thrombospondin type 1 motif, 18	-2.71427	1.16012	-2.97671
						Smoc1	SPARC related modular calcium binding 1	0	0	1.75564																				Adamts4	a disintegrin-like and metallopeptidase (reprolysin type) with thrombospondin type 1 motif, 4	-1.15122	2.73525	-3.7876
						Vwa2	von Willebrand factor A domain containing 2	-2.74262	0	-1.5039																				Tgm7	transglutaminase 7	7.62734	0	-1.15027
						Vwa3a	von Willebrand factor A domain containing 3A	0	0	-1.1153																				Cela3b	chymotrypsin-like elastase family, member 3B	1.18909	3.74432	-1.51195
						Fndc1	fibronectin type III domain containing 1	2.25381	2.02771	0																				Cpn2	carboxypeptidase N, polypeptide 2	1.92592	0	1.05368
						Comp	cartilage oligomeric matrix protein	13.006	10.5342	3.86242																				Ctsf	cathepsin F	0	0	-1.00778
						Mfap3	microfibrillar-associated protein 3	15.4032	9.09426	5.9253																				F7	coagulation factor VII	0	0	1.09347
						Mmrn2	multimerin 2	0	0	-1.13918																				Fam20a	family with sequence similarity 20, member a	-1.00634	6.25811	-1.10364
						Agrn	agrin	4.81349	24.2514	8.65533																				Hyal1	hyaluronoglucosaminidase 1	-1.278	6.15979	4.63766
						Hmcn1	hemicentin 1	0	3.03142	8.77822																				Hyal2	hyaluronoglucosaminidase 2	-1.39848	1.12583	-1.02246
						Slit1	slit homolog 1 (Drosophila)	3.85079	3.03142	2.63347																				Hyal4	hyaluronoglucosaminidase 4	-1.13154	16.697	47.7056
						Igsf10	immunoglobulin superfamily, member 10	46.1998	57.597	65.3978																				Leprel2	leprecan-like 2	2.52476	2.65005	3.06955
						Fras1	Fraser syndrome 1 homolog (human)	4.81349	9.09426	8.77822																				Masp1	mannan-binding lectin serine peptidase 1	-1.11973	2.81219	-3.68397
						Fndc7	fibronectin type III domain containing 7	0	0	-1.13918																				Mmp11	matrix metallopeptidase 11	-1.43155	0	2.54783
						Vtn	vitronectin	0	0	-1.56996																				Mmp12	matrix metallopeptidase 12	266.702	7.58451	1.64721
						Egflam	EGF-like, fibronectin type III and laminin G domains	1.15661	0	0																				Mmp24	matrix metallopeptidase 24	0	1.23883	1.0762
						Lama5	laminin, alpha 5	1.24107	-1.40037	1.23453																				Pcsk6	proprotein convertase subtilisin/kexin type 6	2.09563	3.26645	3.82175
						Lamc3	laminin gamma 3	3.08991	3.24325	-1.06478
						Npnt	nephronectin	10.8543	4.8827	1.54823
						Tnn	tenascin N	-6.08651	4.10726	8.44367

## Sheet: 3. GAG matches
Preparation of Linkage region
Gene symbol	Gene name	d5 FC	d10 FC	d14 FC
B3gat1	3-beta-glucoronosyltransferase 1	1.7565	8.29654	1.60164
B3gat3	3-beta-glucoronosyltransferase 3	2.6763	1.51571	1.75564
B4galt2	Beta-1,4-galactosyltransferase 2	1.11572	2.87187	1.47844
B4galt7	Beta-1,4-galactosyltransferase 7	4.69315	5.30499	4.18612
Glycosaminoglycan chain polimerisation
Gene symbol	Gene name	d5 FC	d10 FC	d14 FC
Has1	Hyaluronan synthase 1	1.25838	-1.26184	-2.17878
Ext1	Exostosin glycosyltransferase 1	2.92138	3.07599	1.89507
Extl2	Exostosin like glycosyltransferase 2	2.22319	3.03142	2.83127
Chpf	Chondroitin polymerizing factor	3.09194	4.5834	2.91737
Chsy3	Chondroitin sulfate synthase 3	1.2283	1.74854	3.17017
Has2	Hyaluronan synthase 2	6.13262	7.58079	3.70906
Ext2	Exostosin glycosyltransferase 2	2.62582	2.33909	5.36789
Extl3	Exostosin like glycosyltransferase 3	6.52049	6.30844	5.89753
Chsy1	Chondroitin sulfate synthase 1	8.60009	14.9045	8.15204
Glycsaminoglycan chain modification
Gene symbol	Gene name	d5 FC	d10 FC	d14 FC
Chst3	Carbohydrate sulfotransferase 3	0	0	0
Hs2st1	Heparan sulfate 2-O-sulfotransferase 1	-1.19709	-1.07713	-1.29178
Hs3st1	Heparan sulfate 3-O-sulfotransferase 1	2.51435	1.1316	-1.1444
Hs6st1	Heparan sulfate-glucosamine 6-sulfotransferase 1	2.98563	-1.49765	-1.03438
Ndst1	N-deacetylase and N-sulfotransferase 1	-1.13548	1.84879	1.07072
Chst15	Carbohydrate sulfotransferase 15	1.22346	0	1.1156
Chst14	Carbohydrate sulfotransferase 14	1.52607	1.22811	1.24145
Glce	Glucuronic acid epimerase	2.45295	1.93624	1.25581
Chst12	Carbohydrate sulfotransferase 12	1.88228	1.58293	1.40413
Ndst2	N-deacetylase and N-sulfotransferase 2	-1.85204	0	1.47703
Sumf1	Sulfatase modifying factor 1	1.17787	1.62131	1.57777
Sulf2	Sulfatase 2	3.31118	3.02847	1.80461
Hs3st3a1	Heparan sulfate-glucosamine 3-sulfotransferase 3A1	0	2.33856	2.03156
Chst8	Carbohydrate sulfotransferase 8	-1.55812	1.01047	2.04825
Sumf2	Sulfatase modifying factor 2	1.63658	2.42514	2.4579
Chst11	Carbohydrate sulfotransferase 11	2.40674	1.51571	4.38911
Sulf1	Sulfatase 1	12.447	10.4511	4.97701
Chst2	Carbohydrate sulfotransferase 2	9.0521	12.5977	5.12774
Hs3st3b1	Heparan sulfate-glucosamine 3-sulfotransferase 3B1	6.25753	17.2639	7.87846
Glycosaminoglycan chain degradation
Gene symbol	Gene name	d5 FC	d10 FC	d14 FC
Hyal3	Hyaluronidase 3	1.92539	0	0
Hpse	Heparanase	3.85079	0	0
Hyal2	Hyaluronidase 2	-1.39848	1.12583	-1.02246
Sgsh	N-Sulfoglucosamine Sulfohydrolase	-2.0775	1.51571	1.16311
Hexa	Hexosaminidase subunit alpha	-1.03033	-1.00012	1.19874
Hexb	Hexosaminidase subunit beta	1.48352	1.72159	1.37492
Idua	Alpha-L-iduronidase	2.11084	2.37004	1.97256
Arsb	Arylsulfatase A	1.90788	1.91655	2.25616
Arsk	Arylsulfatse family member K	-1.54022	0	2.36808
Galns	Galactosamine (N-acetyl)-6-sulfatase	1.7059	3.03142	2.4579
Naga	Alpha-N-Acetylgalactosaminidase	1.97824	1.93495	2.66989
Gusb	Glucoronidase beta	2.05	2.3176	2.9648
Mgea5	Protein O-GlcNAcase	2.36388	2.75637	4.0605
Hyal1	Hyaluronidase 1	-1.278	6.15979	4.63766
Naglu	N-Acetyl-Alpha-Glucosaminidase	5.3911	7.8817	7.05945
