# Supplementary material for: Matrisomal components involved in regenerative wound healing in axolotl and Acomys: implications for biomaterial development
Source: Royal Society of Chemistry journal article supplement (doi:10.1039/d3bm00835e), 2023-01-01
Supplement: d3bm00835e10.xlsx [file d3bm00835e10.xlsx]

## Sheet: 1. Matrisome Stewart vs Gawrilu
Acomys data						Axololt				Acomys
Core matrisome - collagens	D5 Fold	d10 fold	d15 fold		Core matrisome - collagens	Gene Name	5d_tpm	10d_tpm	14d_tpm	D5 Fold	d10 fold	d15 fold
Col18a1	1.74256	2.53354	2.37836		Col1a1	collagen, type I, alpha 1	-3.50759	-4.64076	-6.19049	-0.576396	2.07861	2.95742
Col4a1	1.04327	1.30463	1.24581		Col1a2	collagen, type I, alpha 2	-2.31734	-2.90156	-3.76727	0.188366	2.51953	3.10572
Col5a2	0.994665	3.20164	3.34799		Col6a1	collagen, type VI, alpha 1	-1.98069	-2.44312	-1.38395	0.185943	2.36489	2.83191
Col5a3	0.916487	2.45779	2.21762		Col17a1	collagen, type XVII, alpha 1	1.21516	-1.52129	-2.33338	0.119998	-0.370181	-0.678
Col4a2	0.886461	1.42623	1.36931		Col3a1	collagen, type III, alpha 1	2.36465	2.3979	1.05509	0.26294	2.6981	2.84903
Col9a2	0.798921	1.47531	1.29677		Col11a1	collagen, type XI, alpha 1	-2.35432	-1.37807	-1.18635	-0.726796	0.789964	1.30382
Col12a1	0.566775	1.86565	1.74314		Col2a1	collagen, type II, alpha 1	-1.9563	-1.09701	1.46954	-2.15283	-1.63525	-1.4446
Col5a1	0.549522	3.01435	3.09892		Col5a1	collagen, type V, alpha 1	-1.24225	-1.45834	-1.64666	0.549522	3.01435	3.09892
Col6a2	0.328004	2.3035	2.51439		Col5a2	collagen, type V, alpha 2	-1.2365	-1.12513	-1.40579	0.994665	3.20164	3.34799
Col7a1	0.322954	2.30301	2.66846		Col4a5	collagen, type IV, alpha 5	1.29879	1.70468	1.17102	-1.31863	-0.701184	-0.480214
Col3a1	0.26294	2.6981	2.84903		Col6a3	collagen, type VI, alpha 3	-1.25463	-1.74947	-1.51788	#N/A	#N/A	#N/A
Col1a2	0.188366	2.51953	3.10572		Col6a2	collagen, type VI, alpha 2	2.25654	1.9339	2.39494	0.328004	2.3035	2.51439
Col6a1	0.185943	2.36489	2.83191		Col12a1	collagen, type XII, alpha 1	1.26375	1.32372	-1.06309	0.566775	1.86565	1.74314
Col17a1	0.119998	-0.370181	-0.678		Col4a1	collagen, type IV, alpha 1	-3.00947	-3.57381	-2.59855	1.04327	1.30463	1.24581
Col13a1	0.11875	0.0680329	-0.419543		Col8a1	collagen, type VIII, alpha 1	-7.89449	-6.26769	-2.16445	#N/A	#N/A	#N/A
Col16a1	-0.0262898	0.981392	1.32127		Col9a1	collagen, type IX, alpha 1	-1.48406	-1.50488	5.50722	-1.27655	-0.555041	0.361402
Col15a1	-0.0567304	0.538757	0.584812		Col24a1	collagen, type XXIV, alpha 1	1.16427	1.66319	1.4423	-1.13821	-0.961753	-0.592788
Col8a2	-0.180468	1.23186	1.46096		Col7a1	collagen, type VII, alpha 1	1.80362	1.78323	1.20841	0.322954	2.30301	2.66846
Col27a1	-0.376761	0.680481	0.977222		Col9a2	collagen, type IX, alpha 2	-1.03175	-1.10525	2.99182	0.798921	1.47531	1.29677
Col1a1	-0.576396	2.07861	2.95742		Col4a2	collagen, type IV, alpha 2	-1.76136	-3.21631	-2.49596	0.886461	1.42623	1.36931
Col14a1	-0.695602	0.86316	1.37476		Col28a1	collagen, type XXVIII, alpha 1	2.57521	1.86649	2.48559	-0.699108	-0.737349	0.110292
Col28a1	-0.699108	-0.737349	0.110292		Col4a6	collagen, type IV, alpha 6	3.97159	4.18179	2.75765	-1.76734	-1.7472	-1.56882
Col11a1	-0.726796	0.789964	1.30382		Col9a3	collagen, type IX, alpha 3	-1.16097	-1.05092	7.09658	-1.77989	-1.78855	-1.04804
Col24a1	-1.13821	-0.961753	-0.592788		Col18a1	collagen, type XVIII, alpha 1	2.03924	3.36751	2.43386	1.74256	2.53354	2.37836
Col9a1	-1.27655	-0.555041	0.361402		Col13a1	collagen, type XIII, alpha 1	3.42059	4.63443	2.6958	0.11875	0.0680329	-0.419543
Col4a5	-1.31863	-0.701184	-0.480214		Col14a1	collagen, type XIV, alpha 1	-9.34873	0	0	-0.695602	0.86316	1.37476
Col4a3	-1.71715	-1.80207	-0.384034		Col6a6	collagen, type VI, alpha 6	3.20899	2.6946	2.4384	-2.16231	-0.024279	0.68285
Col4a6	-1.76734	-1.7472	-1.56882		Col22a1	collagen, type XXII, alpha 1	-2.0775	0	-4.55673	-2.04992	-0.898599	-0.113194
Col9a3	-1.77989	-1.78855	-1.04804		Col8a2	collagen, type VIII, alpha 2	1.92539	0	0	-0.180468	1.23186	1.46096
Col19a1	-1.84198	1.23605	1.47741		Col11a2	collagen, type XI, alpha 2	3.09154	0	-1.20079	#N/A	#N/A	#N/A
Col22a1	-2.04992	-0.898599	-0.113194		Col16a1	collagen, type XVI, alpha 1	-2.40363	1.31005	-2.63604	-0.0262898	0.981392	1.32127
Col2a1	-2.15283	-1.63525	-1.4446		Col20a1	collagen, type XX, alpha 1	0	0	-1.39639	#N/A	#N/A	#N/A
Col6a6	-2.16231	-0.024279	0.68285		Col23a1	collagen, type XXIII, alpha 1	2.57336	0	-1.70468	#N/A	#N/A	#N/A
					Col25a1	collagen, type XXV, alpha 1	7.96833	21.9549	17.2563	#N/A	#N/A	#N/A
					Col5a3	collagen, type V, alpha 3	3.90755	0	5.9384	0.916487	2.45779	2.21762
Core matrisome - ECM glycoproteins	D5 Fold	d10 fold	d15 fold		Core matrisome - ECM glycoproteins	Gene Name	5d_tpm	10d_tpm	14d_tpm	D5 Fold	d10 fold	d15 fold
Lama1	5.89996	3.44944	3.33011		Sparc	secreted acidic cysteine rich glycoprotein	-2.0992	-2.78964	-3.94573	-0.616237	0.124449	-0.381798
Spp1	5.48019	4.36804	3.44011		Dpt	dermatopontin	-1.7605	-5.67494	-9.83584	-1.05368	0.901385	1.29504
Lgi3	5.12235	4.79148	0		Mgp	matrix Gla protein	-1.33179	-1.61192	-1.86426	1.49946	0.845224	-0.196469
Tnc	4.00923	5.99326	5.58407		Dspp	dentin sialophosphoprotein	-1.56837	-1.01798	-1.38726	#N/A	#N/A	#N/A
Lamc2	2.99654	1.91932	1.25562		Srpx2	sushi-repeat-containing protein, X-linked 2	-1.09519	-1.64573	-2.38424	1.02876	1.62289	1.26623
Slamf6	2.39195	1.54436	0.999692		Ctgf	connective tissue growth factor	-1.6827	-5.50419	-9.08132	0.893093	0.686245	0.388192
Wisp1	2.32903	3.71978	3.50273		Spp1	secreted phosphoprotein 1	-1.76875	1.19497	-2.54738	5.48019	4.36804	3.44011
Lgi2	2.2699	4.82044	4.70307		Adipoq	adiponectin, C1Q and collagen domain containing	-3.22234	-25.4144	-40.5379	-2.40755	-2.73772	-3.01662
Cthrc1	2.18941	6.23336	5.95229		Spon2	spondin 2, extracellular matrix protein	-1.10959	-4.25099	-3.65554	0.549798	0.165478	-0.109456
Fgl2	2.1406	0.977128	0.393767		Igfbp2	insulin-like growth factor binding protein 2	-5.91637	-1.43275	-1.22134	#N/A	#N/A	#N/A
Coch	2.05183	1.73444	0.0805743		Vwa5a	von Willebrand factor A domain containing 5A	-1.09093	1.14622	1.48127	0.859339	1.02767	0.629527
Emilin1	1.89667	3.69307	3.25415		Mfap5	microfibrillar associated protein 5	-1.70588	-3.45839	-9.57739	-1.94884	0.38432	0.409721
Lama3	1.79439	0.906942	0.37625		Crispld2	cysteine-rich secretory protein LCCL domain containing 2	1.46187	-3.84314	-3.76722	0.106975	0.673956	0.690757
Emilin2	1.77666	1.00031	1.09949		Mfap2	microfibrillar-associated protein 2	2.26322	4.24774	3.31491	-1.07615	2.14879	2.35484
Fn1	1.69882	4.04951	3.63086		Fbln5	fibulin 5	-1.39164	-2.93334	-2.13008	0.204609	0.714212	0.890853
Igfbp4	1.65711	1.83887	1.99423		Postn	periostin, osteoblast specific factor	1.29104	4.81322	4.48857	-0.75083	0.447365	0.508637
Thbs2	1.65559	3.11927	3.05013		Crim1	cysteine rich transmembrane BMP regulator 1 (chordin like)	-1.43653	-1.29257	-2.20158	-0.365311	-0.871349	-0.935795
Spon1	1.59597	2.89937	2.8448		Thbs3	thrombospondin 3	-1.23315	1.00217	1.28906	-1.10904	0.650105	0.800509
Tgfbi	1.59139	1.93093	1.54414		Pcolce2	procollagen C-endopeptidase enhancer 2	-1.11116	-1.14354	-1.79871	-1.36001	-0.406282	-1.20119
Mgp	1.49946	0.845224	-0.196469		Cthrc1	collagen triple helix repeat containing 1	1.93936	3.78008	3.15243	2.18941	6.23336	5.95229
Lamb3	1.44141	0.342653	-0.0302598		Nid2	nidogen 2	-1.24149	1.24216	1.5723	0.323873	0.949013	1.14044
Creld2	1.41596	0.814476	0.660345		Creld2	cysteine-rich with EGF-like domains 2	2.64996	2.64438	2.74759	1.41596	0.814476	0.660345
Thbs1	1.22491	-0.807521	-1.03306		Thbs4	thrombospondin 4	1.80873	3.39322	2.8969	-0.00136825	0.746163	0.592828
Tnfaip6	1.209	0.821994	0.569674		Papln	papilin, proteoglycan-like sulfated glycoprotein	-1.38853	-1.2617	-1.42246	0.450374	-0.169276	-0.029831
Srpx2	1.02876	1.62289	1.26623		Gldn	gliomedin	-2.50042	-5.55845	-22.3944	-1.48483	-2.15549	-1.75608
Ctgf	0.893093	0.686245	0.388192		Tnxb	tenascin XB	-3.49062	-10.0063	-20.6917	-0.533642	-0.187001	-0.704886
Wisp2	0.872121	0.572485	-0.429346		Vit	vitrin	-1.2887	-1.38679	-1.38365	-2.00412	-1.67582	-2.22524
Vwa5a	0.859339	1.02767	0.629527		Thsd4	thrombospondin, type I, domain containing 4	1.54735	-1.22352	1.39933	-0.437517	-0.406841	-0.600474
Vwf	0.817226	1.03247	0.74902		Pxdn	peroxidasin homolog (Drosophila)	2.09638	3.82123	4.22705	0.708118	3.51017	3.54873
Pxdn	0.708118	3.51017	3.54873		Fgl1	fibrinogen-like protein 1	-1.11094	-1.39965	-1.24541	0.553956	-1.06902	-3.31239
Vwa1	0.702156	1.39168	1.31853		Fn1	fibronectin 1	3.06582	2.33381	1.26799	1.69882	4.04951	3.63086
Igfals	0.69839	0.852541	-0.405592		Tgfbi	transforming growth factor, beta induced	5.99462	10.8562	15.1187	1.59139	1.93093	1.54414
Efemp1	0.68342	0.102613	-0.280311		Tnfaip6	tumor necrosis factor alpha induced protein 6	2.48004	1.64007	-1.26313	1.209	0.821994	0.569674
AW551984	0.68331	1.96476	2.00188		Matn2	matrilin 2	-2.10075	-4.51603	-4.40357	-0.126165	1.14141	1.84398
Fbln2	0.68057	3.09277	2.68012		Thbs2	thrombospondin 2	2.93057	5.16871	5.39684	1.65559	3.11927	3.05013
Ltbp2	0.597871	1.35694	0.958002		Igfbp3	insulin-like growth factor binding protein 3	1.97524	2.45261	1.01087	0.302748	0.15035	-0.21402
Ltbp1	0.589785	1.0102	0.821271		Lama2	laminin, alpha 2	-2.4885	-8.70494	-3.53591	-1.26992	-0.848739	-0.687635
Hmcn1	0.571361	1.28813	1.90841		Ltbp1	latent transforming growth factor beta binding protein 1	1.82988	2.95587	3.04448	0.589785	1.0102	0.821271
Fgl1	0.553956	-1.06902	-3.31239		Efemp2	epidermal growth factor-containing fibulin-like extracellular matrix protein 2	1.91989	2.91517	2.89267	-1.04778	-0.294117	-0.337782
Slit2	0.550965	0.241856	0.610155		Pcolce	procollagen C-endopeptidase enhancer protein	-1.16592	1.01075	-1.03142	0.351599	1.39859	1.41256
Spon2	0.549798	0.165478	-0.109456		Vwde	von Willebrand factor D and EGF domains	3.22355	6.186	5.35836	#N/A	#N/A	#N/A
Emid1	0.532302	1.19505	1.50591		Lama4	laminin, alpha 4	-1.99396	-2.59174	-1.56221	0.197172	0.738388	0.574405
Creld1	0.51752	0.557749	0.504494		Fbn1	fibrillin 1	-1.24786	-7.33889	-6.7929	0.473254	1.3061	0.94086
Fbn1	0.473254	1.3061	0.94086		Abi3bp	ABI gene family, member 3 (NESH) binding protein	-1.88304	-8.54187	-6.71936	-0.3223	-0.29415	-0.730245
Papln	0.450374	-0.169276	-0.029831		Igfbp5	insulin-like growth factor binding protein 5	2.46663	3.04144	1.86947	-0.268329	-0.0971226	0.255174
Tsku	0.437365	1.00117	1.02002		Fbn2	fibrillin 2	2.45037	3.00292	2.13796	-0.571605	1.76009	2.56539
Svep1	0.425944	0.0401295	-0.364018		Srpx	sushi-repeat-containing protein	3.0179	-1.08276	1.93991	-0.650029	-0.358513	-0.245905
Rspo4	0.403208	0.264695	0.205046		Gas6	growth arrest specific 6	2.40076	1.30496	1.46006	-0.340606	0.199	0.306625
Cyr61	0.375355	0.287085	-0.275556		Nov	nephroblastoma overexpressed gene	2.19588	1.39106	-1.00979	-0.630742	1.15893	1.24121
Pcolce	0.351599	1.39859	1.41256		Lamc1	laminin, gamma 1	3.16036	3.74681	3.01633	0.0928293	0.106642	0.076031
Ntng1	0.333035	0.46685	0.567345		Matn1	matrilin 1, cartilage matrix protein	-3.65667	-19.1956	-5.1627	#N/A	#N/A	#N/A
Nid2	0.323873	0.949013	1.14044		Fbln1	fibulin 1	1.76081	4.88561	10.4388	-0.22205	-0.334865	0.122113
Igfbp3	0.302748	0.15035	-0.21402		Efemp1	epidermal growth factor-containing fibulin-like extracellular matrix protein 1	1.22852	1.23654	-2.26911	0.68342	0.102613	-0.280311
Mfap1b	0.255849	-0.11532	-0.158134		Lamb1	laminin B1 subunit 1	2.18509	2.85894	2.31314	#N/A	#N/A	#N/A
Fbln5	0.204609	0.714212	0.890853		Ecm2	extracellular matrix protein 2, female organ and adipocyte specific	1.47701	1.03174	1.14253	-1.21142	-0.293195	0.118288
Lama4	0.197172	0.738388	0.574405		Slit2	slit homolog 2 (Drosophila)	1.65726	1.64196	1.14155	0.550965	0.241856	0.610155
Mfap3	0.110725	0.144778	0.0685645		Emilin2	elastin microfibril interfacer 2	1.43431	1.70538	1.57573	1.77666	1.00031	1.09949
Crispld2	0.106975	0.673956	0.690757		Coch	coagulation factor C homolog (Limulus polyphemus)	2.82347	-2.09016	-1.37062	2.05183	1.73444	0.0805743
Kcp	0.102769	1.57139	2.14364		Vwf	Von Willebrand factor homolog	1.68397	1.83912	2.0394	0.817226	1.03247	0.74902
Lamc1	0.0928293	0.106642	0.076031		Ltbp3	latent transforming growth factor beta binding protein 3	-1.10234	-1.00549	-1.13918	-0.63433	0.134415	0.648442
Ecm1	0.079427	0.148038	-0.0743373		Sned1	sushi, nidogen and EGF-like domains 1	2.75056	3.89754	2.9244	-0.124827	-0.498852	-1.09682
Lama5	0.0612924	0.0934959	-0.067919		Thbs1	thrombospondin 1	13.341	9.04215	3.42674	1.22491	-0.807521	-1.03306
Matn4	0.0595107	-0.860186	-0.417584		Spon1	spondin 1, (f-spondin) extracellular matrix protein	-1.08828	1.10049	1.56885	1.59597	2.89937	2.8448
Agrn	0.0523912	0.244116	0.375444		Ntn1	netrin 1	1.58451	1.48335	1.34524	-0.450826	-0.288997	0.323026
Tinagl1	0.00753472	-0.504324	-0.450434		Bmper	BMP-binding endothelial regulator	-2.42375	-2.30915	-1.06324	-0.827466	-0.00249695	0.248418
Nell1	0	7.65321	7.324		Cilp	cartilage intermediate layer protein, nucleotide pyrophosphohydrolase	1.12322	-1.04242	1.1336	-1.70168	-0.337593	0.0138423
Thbs4	-0.00136825	0.746163	0.592828		Wisp1	WNT1 inducible signaling pathway protein 1	1.40169	1.061	-2.27837	2.32903	3.71978	3.50273
Rspo2	-0.0455285	-0.508865	-0.807418		Lgi1	leucine-rich repeat LGI family, member 1	-2.15844	-7.91708	-1.13918	-1.53131	-0.937259	-1.69221
Emilin3	-0.0753544	0.136419	0.0356259		Lamb2	laminin, beta 2	-1.09703	-2.09033	-10.1671	-0.281272	-0.0858324	0.0429219
Sned1	-0.124827	-0.498852	-1.09682		Igfbp7	insulin-like growth factor binding protein 7	-1.55812	0	-1.70877	-0.402957	-0.152262	-0.181408
Matn2	-0.126165	1.14141	1.84398		Fgl2	fibrinogen-like protein 2	4.98465	1.51287	1.58643	2.1406	0.977128	0.393767
Slit3	-0.154242	-0.363803	0.000879797		Emilin3	elastin microfibril interfacer 3	-4.15499	0	-1.13918	-0.0753544	0.136419	0.0356259
Aebp1	-0.170432	1.02829	1.12389		Edil3	EGF-like repeats and discoidin I-like domains 3	5.55806	5.19672	2.23218	-0.985161	0.0517868	0.611828
Rspo1	-0.192077	-0.901691	-0.802024		Otog	otogelin	11.287	7.08175	6.99705	#N/A	#N/A	#N/A
Fbln1	-0.22205	-0.334865	0.122113		Zpld1	zona pellucida like domain containing 1	-2.5387	0	1.4367	#N/A	#N/A	#N/A
Nid1	-0.228468	0.310658	0.283872		Dmbt1	deleted in malignant brain tumors 1	0	-1.97927	-6.8351	#N/A	#N/A	#N/A
Igfbp5	-0.268329	-0.0971226	0.255174		Emilin1	elastin microfibril interfacer 1	11.6313	18.974	10.617	1.89667	3.69307	3.25415
Lamb2	-0.281272	-0.0858324	0.0429219		Ecm1	extracellular matrix protein 1	5.07486	3.80231	2.94074	0.079427	0.148038	-0.0743373
Mfge8	-0.314033	0.214166	0.228188		Mmrn1	multimerin 1	-1.86975	-2.9689	-10.2526	-0.950245	-0.829896	-1.41582
Abi3bp	-0.3223	-0.29415	-0.730245		Tnc	tenascin C	20.9633	25.0393	12.3478	4.00923	5.99326	5.58407
Gas6	-0.340606	0.199	0.306625		Fbln2	fibulin 2	1.4057	0	-1.31029	0.68057	3.09277	2.68012
Smoc2	-0.362387	-0.121449	-0.0613908		Svep1	sushi, von Willebrand factor type A, EGF and pentraxin domain containing 1	2.54733	2.72419	1.31476	0.425944	0.0401295	-0.364018
Crim1	-0.365311	-0.871349	-0.935795		Lamb3	laminin, beta 3	1.97888	2.18936	1.07289	1.44141	0.342653	-0.0302598
Igfbp7	-0.402957	-0.152262	-0.181408		Slit3	slit homolog 3 (Drosophila)	-1.28508	2.62536	1.41303	-0.154242	-0.363803	0.000879797
Mmrn2	-0.405925	-0.290639	-0.43478		Crispld1	cysteine-rich secretory protein LCCL domain containing 1	1.23775	-2.30915	1.25403	-0.851946	-1.5629	-1.00707
Thsd4	-0.437517	-0.406841	-0.600474		Matn4	matrilin 4	1.60228	17.8773	45.2745	0.0595107	-0.860186	-0.417584
Ntn1	-0.450826	-0.288997	0.323026		Cyr61	cysteine rich protein 61	2.3903	4.42631	4.36503	0.375355	0.287085	-0.275556
Tnn	-0.459634	3.24151	3.07915		Vwa1	von Willebrand factor A domain containing 1	-4.15499	-1.31951	-4.55673	0.702156	1.39168	1.31853
Colq	-0.531239	-0.542244	-0.781165		Dmp1	dentin matrix protein 1	8.98517	6.40373	-1.24411	#N/A	#N/A	#N/A
Tnxb	-0.533642	-0.187001	-0.704886		Tsku	tsukushin	1.44405	1.51571	1.31673	0.437365	1.00117	1.02002
Fbn2	-0.571605	1.76009	2.56539		Reln	reelin	-1.29844	-1.64939	2.10677	-1.17624	0.117819	0.289589
Vtn	-0.607695	-0.556365	-0.844307		Lama3	laminin, alpha 3	-1.29973	0	-5.70161	1.79439	0.906942	0.37625
Sparc	-0.616237	0.124449	-0.381798		Aebp1	AE binding protein 1	4.32955	3.73743	1.41693	-0.170432	1.02829	1.12389
Nov	-0.630742	1.15893	1.24121		Tecta	tectorin alpha	7.81138	12.3941	3.38179	#N/A	#N/A	#N/A
Ltbp3	-0.63433	0.134415	0.648442		Lama1	laminin, alpha 1	4.04858	7.69613	10.4922	5.89996	3.44944	3.33011
Srpx	-0.650029	-0.358513	-0.245905		Rspo3	R-spondin 3 homolog (Xenopus laevis)	2.40674	0	1.31673	-1.65395	-1.51428	-0.95639
Ddx26b	-0.654667	-0.398625	-0.51371		Zp1	zona pellucida glycoprotein 1	3.31983	0	0	#N/A	#N/A	#N/A
Npnt	-0.658792	-0.472534	-0.498876		Mfap4	microfibrillar-associated protein 4	1.92539	0	3.51129	#N/A	#N/A	#N/A
Comp	-0.704616	-0.77484	-1.00288		Smoc2	SPARC related modular calcium binding 2	1.92539	0	5.26693	-0.362387	-0.121449	-0.0613908
Lgi4	-0.712599	-0.318777	-0.44404		Zp1	zona pellucida glycoprotein 1	4.36365	0	0	#N/A	#N/A	#N/A
Postn	-0.75083	0.447365	0.508637		Smoc1	SPARC related modular calcium binding 1	0	0	1.75564	-1.08405	-0.0902841	-0.025197
Bmper	-0.827466	-0.00249695	0.248418		Vwa2	von Willebrand factor A domain containing 2	-2.74262	0	-1.5039	-0.909471	-1.16389	-1.00743
Crispld1	-0.851946	-1.5629	-1.00707		Vwa3a	von Willebrand factor A domain containing 3A	0	0	-1.1153	#N/A	#N/A	#N/A
Fras1	-0.855696	-1.26417	-0.486274		Fndc1	fibronectin type III domain containing 1	2.25381	2.02771	0	-1.94557	-0.821415	-0.00180897
Vwa2	-0.909471	-1.16389	-1.00743		Comp	cartilage oligomeric matrix protein	13.006	10.5342	3.86242	-0.704616	-0.77484	-1.00288
Mmrn1	-0.950245	-0.829896	-1.41582		Mfap3	microfibrillar-associated protein 3	15.4032	9.09426	5.9253	0.110725	0.144778	0.0685645
Edil3	-0.985161	0.0517868	0.611828		Mmrn2	multimerin 2	0	0	-1.13918	-0.405925	-0.290639	-0.43478
Efemp2	-1.04778	-0.294117	-0.337782		Agrn	agrin	4.81349	24.2514	8.65533	0.0523912	0.244116	0.375444
Dpt	-1.05368	0.901385	1.29504		Hmcn1	hemicentin 1	0	3.03142	8.77822	0.571361	1.28813	1.90841
Mfap2	-1.07615	2.14879	2.35484		Slit1	slit homolog 1 (Drosophila)	3.85079	3.03142	2.63347	#N/A	#N/A	#N/A
Smoc1	-1.08405	-0.0902841	-0.025197		Igsf10	immunoglobulin superfamily, member 10	46.1998	57.597	65.3978	#N/A	#N/A	#N/A
Thbs3	-1.10904	0.650105	0.800509		Fras1	Fraser syndrome 1 homolog (human)	4.81349	9.09426	8.77822	-0.855696	-1.26417	-0.486274
Lrg1	-1.12773	-1.9007	-2.37796		Fndc7	fibronectin type III domain containing 7	0	0	-1.13918	#N/A	#N/A	#N/A
Egflam	-1.16956	0.286004	0.695634		Vtn	vitronectin	0	0	-1.56996	-0.607695	-0.556365	-0.844307
Reln	-1.17624	0.117819	0.289589		Egflam	EGF-like, fibronectin type III and laminin G domains	1.15661	0	0	-1.16956	0.286004	0.695634
Ecm2	-1.21142	-0.293195	0.118288		Lama5	laminin, alpha 5	1.24107	-1.40037	1.23453	0.0612924	0.0934959	-0.067919
Lama2	-1.26992	-0.848739	-0.687635		Lamc3	laminin gamma 3	3.08991	3.24325	-1.06478	-1.80167	-1.1887	-0.921401
Hmcn2	-1.27384	0.477584	0.618043		Npnt	nephronectin	10.8543	4.8827	1.54823	-0.658792	-0.472534	-0.498876
Pcolce2	-1.36001	-0.406282	-1.20119		Tnn	tenascin N	-6.08651	4.10726	8.44367	-0.459634	3.24151	3.07915
Matn3	-1.40733	-1.25113	-0.0418502
Igfbp6	-1.41902	-0.851869	-0.693008
Ntn4	-1.42653	-1.1975	-1.35019
Gldn	-1.48483	-2.15549	-1.75608
Lgi1	-1.53131	-0.937259	-1.69221
Ibsp	-1.53359	-0.835736	0.363175
Cilp2	-1.59389	-1.47152	-0.385071
Ltbp4	-1.62429	-1.55686	-1.47521
Rspo3	-1.65395	-1.51428	-0.95639
Cilp	-1.70168	-0.337593	0.0138423
Eln	-1.7426	-1.12494	-0.556388
Lamc3	-1.80167	-1.1887	-0.921401
Sparcl1	-1.8561	-0.514544	-0.14615
Fndc1	-1.94557	-0.821415	-0.00180897
Mfap5	-1.94884	0.38432	0.409721
Vit	-2.00412	-1.67582	-2.22524
Adipoq	-2.40755	-2.73772	-3.01662
Ntng2	-2.54515	-2.42797	-1.97645
Nell2	-3.45632	-0.675371	0.0902123
Oit3	-4.73937	1.45874	2.71235
Vwa3b	-5.97959	-6.19677	-6.15555
Tnr	-7.40455	-1.65271	-0.950052
Wisp3	-7.8346	-8.05495	-8.01284
Core matrisome - Proteoglycans	D5 Fold	d10 fold	d15 fold		Core matrisome - Proteoglycans	Gene Name	7d_tpm	10d_tpm	14d_tpm	D5 Fold	d10 fold	d15 fold
Srgn	4.47657	1.88327	1.18642		Lum	lumican	-1.01446	-1.39599	-1.27235	-3.08888	0.437612	-1.44982
Prg4	2.66787	4.25556	2.8815		Dcn	decorin	-1.39202	-1.46839	-1.88534	-0.616533	-0.49635	-0.270415
Vcan	2.41064	1.31075	1.71433		Ogn	osteoglycin	-2.98268	-2.47924	-1.55091	-1.408	-0.646366	0.316547
Spock3	0.469189	4.28495	2.56493		Srgn	serglycin	3.14602	1.7164	1.11509	4.47657	1.88327	1.18642
Bgn	0.357767	2.03377	1.94937		Bgn	biglycan	1.40888	1.35219	1.27278	0.357767	2.03377	1.94937
Hapln3	0.297281	1.91417	2.23387		Kera	keratocan	1.40847	2.71465	2.16608	-3.03125	-2.54991	-0.509239
Hspg2	0.225905	1.67652	1.86288		Vcan	versican	3.82008	5.98495	4.42251	2.41064	1.31075	1.71433
Podn	0.0751384	0.517348	0.845351		Prg2	proteoglycan 2, bone marrow	4.71805	1.05441	-1.12985	#N/A	#N/A	#N/A
Ncan	0	4.99613	5.95252		Hapln3	hyaluronan and proteoglycan link protein 3	1.50531	1.43304	1.48607	0.297281	1.91417	2.23387
Fmod	-0.0993649	0.542978	0.537903		Spock3	sparc/osteonectin, cwcv and kazal-like domains proteoglycan 3	1.52007	-2.68741	-1.97039	0.469189	4.28495	2.56493
Hapln1	-0.345347	-1.13252	-1.52369		Hspg2	perlecan (heparan sulfate proteoglycan 2)	-1.02028	-1.0592	1.02599	0.225905	1.67652	1.86288
Dcn	-0.616533	-0.49635	-0.270415		Ncan	neurocan	8.04902	-1.70465	1.96416	0	4.99613	5.95252
Prelp	-0.707416	-0.523692	-0.535729		Acan	aggrecan	3.20046	-1.0798	1.6047	-0.981071	-0.745749	-0.763079
Acan	-0.981071	-0.745749	-0.763079		Bcan	brevican	16.8495	3.30238	3.20339	-3.6532	-3.14128	-2.30622
Epyc	-1.31917	-1.65705	-1.80849		Optc	opticin	2.07117	4.44753	8.15372	#N/A	#N/A	#N/A
Ogn	-1.408	-0.646366	0.316547		Prg4	proteoglycan 4 (megakaryocyte stimulating factor, articular superficial zone protein)	27.1728	4.3922	1.80873	2.66787	4.25556	2.8815
Aspn	-1.46707	0.486532	0.781295		Prelp	proline arginine-rich end leucine-rich repeat	1.92539	0	1.21139	-0.707416	-0.523692	-0.535729
Esm1	-1.50497	-0.161876	-0.554303		Aspn	asporin	6.73888	0	1.58886	-1.46707	0.486532	0.781295
Chadl	-1.64972	-1.08103	-0.657338		Epyc	epiphycan	-1.12091	1.40461	4.88088	-1.31917	-1.65705	-1.80849
Spock2	-1.82224	-1.28874	-1.39387		Hapln1	hyaluronan and proteoglycan link protein 1	1.44642	0	3.07742	-0.345347	-1.13252	-1.52369
Omd	-1.84742	-2.05963	-1.10853		Omd	osteomodulin	0	5.28264	0.7926	-1.84742	-2.05963	-1.10853
Chad	-2.05562	-2.18787	-2.18146
Kera	-3.03125	-2.54991	-0.509239
Lum	-3.08888	0.437612	-1.44982
Impg2	-3.15498	-2.96124	-2.61543
Bcan	-3.6532	-3.14128	-2.30622
Hapln4	-5.08342	-0.0371311	1.37904
Spock1	-7.09539	-7.31643	-7.27408
Hapln2	-7.16486	-2.39114	-7.345
Matrisome associated - ECM affiliated	D5 Fold	D10 fold	d15 fold		Matrisome associated - ECM affiliated	Gene Name	7d_tpm	10d_tpm	14d_tpm	D5 Fold	D10 fold	d15 fold
Clec4d	8.74192	4.0694	2.3672		Anxa3	annexin A3	1.00129	-1.03695	-1.28076	0.547791	0.484693	0.086489
Clec7a	5.50489	2.77032	2.68758		Lgals4	lectin, galactose binding, soluble 4	1.03274	-1.20168	-1.37731	#N/A	#N/A	#N/A
Sftpc	5.12235	4.99613	0		Anxa4	annexin A4	-1.17805	1.00802	-1.19835	0.610154	0.823723	0.732491
Clec4e	4.97716	1.76796	1.21676		Itln1	intelectin 1 (galactofuranose binding)	2.91459	2.71565	-1.01235	#N/A	#N/A	#N/A
Fcnb	4.4623	2.34709	1.80483		Lgals1	lectin, galactose binding, soluble 1	2.01398	1.65452	1.41936	1.51427	2.14844	2.22394
Clec4b1	3.25647	1.72847	1.13734		Anxa11	annexin A11	1.11681	1.05567	-1.00625	0.391552	0.00471931	-0.0452288
Clec12a	3.20719	2.30611	3.74389		Lgals3	lectin, galactose binding, soluble 3	1.20995	1.33297	-1.01337	-1.99018	0.172155	-4.38699
Clec5a	3.17239	0.923588	0.590232		Anxa5	annexin A5	1.28081	-1.10334	-1.36594	0.512231	0.721997	0.370426
Clec4n	3.16818	1.75946	1.33284		Anxa1	annexin A1	1.37669	1.31571	1.08599	1.97527	0.550932	0.0167074
Clec4a1	3.10728	1.32848	0.749872		Anxa2	annexin A2	1.49923	1.30139	1.221	0.985033	0.399769	0.0783541
Sema6b	2.82152	1.73374	0.910295		Clec3b	C-type lectin domain family 3, member b	-1.15799	-2.51045	-5.9788	-0.19546	0.10051	0.266703
Plxnc1	2.34783	1.31832	1.00873		Anxa7	annexin A7	1.60143	1.79895	1.7207	0.282869	-0.186637	-0.395294
Clec4a3	2.27558	1.32814	0.825231		Clec2d	C-type lectin domain family 2, member d	-1.36355	-2.00602	-1.68899	-0.287936	-0.561864	-0.925405
Lgals9	2.06891	0.903634	0.696457		Anxa6	annexin A6	-1.39685	-1.60685	-1.59418	0.625986	0.713372	0.695579
Muc13	2.055	-4.95576	0.347937		Sftpc	surfactant associated protein C	-1.08069	-2.88791	-2.91175	5.12235	4.99613	0
Anxa1	1.97527	0.550932	0.0167074		Sdc2	syndecan 2	1.21922	-1.09877	-1.27385	-0.858938	0.0510248	0.139521
Clec9a	1.91627	0.711528	0.618107		Muc2	mucin 2	1.52268	2.47376	1.32586	#N/A	#N/A	#N/A
Lgals1	1.51427	2.14844	2.22394		C1qtnf1	C1q and tumor necrosis factor related protein 1	-3.28747	-3.23644	-1.84736	0.263471	0.352739	0.557428
Sdc1	1.47532	0.75165	0.530023		Lman1	lectin, mannose-binding, 1	1.41804	1.99383	1.77067	0.6019	0.893815	0.876905
C1qa	1.44572	1.01243	0.64602		Lgals9	lectin, galactose binding, soluble 9	3.90755	2.35296	1.84436	2.06891	0.903634	0.696457
Plxna3	1.42931	1.10821	1.02498		Sema4f	sema domain, immunoglobulin domain (Ig), TM domain, and short cytoplasmic domain	-1.07283	-1.22288	-1.77993	0.547771	1.68171	1.38531
Clec4g	1.42364	2.40751	2.12704		C1qc	complement component 1, q subcomponent, C chain	2.20822	1.80821	1.41666	1.14865	0.593713	0.372741
Hpx	1.19952	0.740593	1.72082		Muc4	mucin 4	-1.11891	1.06096	-1.0769	#N/A	#N/A	#N/A
C1qc	1.14865	0.593713	0.372741		C1qb	complement component 1, q subcomponent, beta polypeptide	2.61891	1.82574	1.53526	#N/A	#N/A	#N/A
Plxna4	1.09167	0.994391	0.927709		Gpc1	glypican 1	1.24181	-1.24688	-1.51893	-0.0579319	0.19575	-0.00995079
Sema4g	1.0856	1.1044	0.923014		Sdc1	syndecan 1	6.56179	5.83671	3.79252	1.47532	0.75165	0.530023
C1qtnf6	1.08217	2.59061	3.24237		Sema4d	sema domain, immunoglobulin domain (Ig), transmembrane domain (TM) and short cytoplasmic domain, (semaphorin) 4D	1.22943	1.39361	2.32368	0.515149	0.487808	0.177707
Lgals7	1.0536	0.558861	0.197751		Colec12	collectin sub-family member 12	2.03461	2.4565	1.74036	0.206264	0.419416	0.0447481
Cspg5	1.00751	0.405528	-0.118186		Parm1	prostate androgen-regulated mucin-like protein 1	1.62363	2.20013	1.59499	-0.314024	-0.184506	-0.308821
Anxa2	0.985033	0.399769	0.0783541		C1ql2	complement component 1, q subcomponent-like 2	1.56533	2.7109	-1.35012	#N/A	#N/A	#N/A
Sema4a	0.978768	0.443376	0.147111		Sdc4	syndecan 4	2.52364	1.71385	1.10294	0.303144	-0.209408	-0.378443
Sema4b	0.960703	0.546667	0.502252		Sema6a	sema domain, transmembrane domain (TM), and cytoplasmic domain, (semaphorin) 6A	1.31185	2.44217	2.71951	-0.604235	-0.278334	-0.294902
Anxa6	0.625986	0.713372	0.695579		Muc15	mucin 15	2.4229	3.05864	2.29672	-0.688516	-0.897472	-1.10739
Anxa4	0.610154	0.823723	0.732491		Gpc4	glypican 4	3.17861	2.065	3.17912	-1.02268	0.0375675	0.16423
Lman1	0.6019	0.893815	0.876905		C1qa	complement component 1, q subcomponent, alpha polypeptide	8.12017	4.47855	3.02728	1.44572	1.01243	0.64602
Clec2e	0.597687	0.112742	-0.116453		Sema6d	sema domain, transmembrane domain (TM), and cytoplasmic domain, (semaphorin) 6D	1.12065	-1.00885	1.54299	-0.25391	-0.101942	0.0771681
Lman1l	0.573586	-0.122463	-0.384034		Plxna4	plexin A4	1.00778	-1.99576	1.01566	1.09167	0.994391	0.927709
Sema4c	0.569122	0.756245	0.628657		Sema3d	sema domain, immunoglobulin domain (Ig), short basic domain, secreted, (semaphorin) 3D	-1.99232	-1.75752	1.11673	-2.51769	-1.99202	-2.3169
Anxa3	0.547791	0.484693	0.086489		Sftpd	surfactant associated protein D	11.3656	2.6007	1.55257	#N/A	#N/A	#N/A
Sema4f	0.547771	1.68171	1.38531		C1qtnf6	C1q and tumor necrosis factor related protein 6	-1.73125	-1.64939	1.40452	1.08217	2.59061	3.24237
Sema4d	0.515149	0.487808	0.177707		Lgals8	lectin, galactose binding, soluble 8	1.04065	1.28459	-1.0614	0.0213576	-0.297267	-0.465248
Anxa5	0.512231	0.721997	0.370426		Clec11a	C-type lectin domain family 11, member a	1.53122	5.37063	6.3694	0.0122615	0.668412	1.09276
Sema3f	0.473254	0.322477	0.32438		Sema5a	sema domain, seven thrombospondin repeats (type 1 and type 1-like), transmembrane domain (TM) and short cytoplasmic domain, (semaphorin) 5A	1.10532	2.02095	3.15658	-0.669756	-0.929066	-0.643353
Sema3g	0.402059	-0.413395	-0.227252		Muc16	mucin 16	3.66258	5.02535	2.02807	#N/A	#N/A	#N/A
Anxa11	0.391552	0.00471931	-0.0452288		Sema3e	sema domain, immunoglobulin domain (Ig), short basic domain, secreted, (semaphorin) 3E	2.88809	2.18936	2.45059	-1.02344	-1.41066	-1.19499
Sema7a	0.390241	0.12475	-0.156917		Plxnb2	plexin B2	2.18223	3.03142	3.07128	#N/A	#N/A	#N/A
Sdc4	0.303144	-0.209408	-0.378443		Muc5b	mucin 5, subtype B, tracheobronchial	4.77059	3.01107	11.381	#N/A	#N/A	#N/A
Anxa7	0.282869	-0.186637	-0.395294		Clec3a	C-type lectin domain family 3, member a	-1.90437	-3.62866	-2.5062	-1.84775	-2.03216	-1.9853
C1qtnf1	0.263471	0.352739	0.557428		Clec9a	C-type lectin domain family 9, member a	1.56179	0	-1.57559	1.91627	0.711528	0.618107
C1qtnf3	0.251903	1.92422	2.27139		C1qtnf3	C1q and tumor necrosis factor related protein 3	-5.19374	0	-5.69591	0.251903	1.92422	2.27139
Colec12	0.206264	0.419416	0.0447481		Plxdc2	plexin domain containing 2	-6.23249	0	-1.70877	-0.598523	-0.338855	-0.575399
C1ql1	0.18833	-0.29219	-0.0663101		Lgals12	lectin, galactose binding, soluble 12	1.92402	3.06607	2.23719	-2.43809	-1.94125	-2.55605
Plxnd1	0.153535	0.320468	0.306861		Cspg5	chondroitin sulfate proteoglycan 5	-2.59687	-1.64939	-1.89864	1.00751	0.405528	-0.118186
Lgals8	0.0213576	-0.297267	-0.465248		Plxnb3	plexin B3	2.36879	1.5214	2.02811	-1.47063	-1.89805	-1.44376
Clec11a	0.0122615	0.668412	1.09276		Plxnd1	plexin D1	4.93382	4.92606	4.91032	0.153535	0.320468	0.306861
Sema3a	-0.000847897	0.018789	-0.144336		Frem1	Fras1 related extracellular matrix protein 1	1.48626	-1.42947	2.70099	-0.886198	-0.766865	-0.0733
Plxna2	-0.00194932	-0.23766	-0.36538		Cspg4	chondroitin sulfate proteoglycan 4	3.63487	2.59836	4.42673	-0.474179	-0.600604	-0.815853
Plxnb1	-0.0351074	-0.273692	-0.319935		Clec2l	C-type lectin domain family, member L	2.27003	1.79374	1.29855	#N/A	#N/A	#N/A
Gpc1	-0.0579319	0.19575	-0.00995079		Plxnc1	plexin C1	3.85079	6.06284	1.75564	2.34783	1.31832	1.00873
C1qtnf9	-0.111219	-2.93526	-2.42869		Sema5b	sema domain, seven thrombospondin repeats (type 1 and type 1-like), transmembrane domain (TM) and short cytoplasmic domain, (semaphorin) 5B	0	3.70272	0	-1.64621	-0.649092	0.0943643
C1qtnf7	-0.119971	0.091455	0.0991686		Clec4g	C-type lectin domain family 4, member g	4.81349	0	-1.13918	1.42364	2.40751	2.12704
Sema3c	-0.136263	-0.574849	-0.65515		Frem2	Fras1 related extracellular matrix protein 2	32.2176	70.2412	25.9142	-1.06457	-0.911603	-0.632839
Anxa8	-0.140042	-0.734769	-1.23668		Sema3f	sema domain, immunoglobulin domain (Ig), short basic domain, secreted, (semaphorin) 3F	2.56719	1.01047	2.04825	0.473254	0.322477	0.32438
Clec1a	-0.194123	-0.847353	-1.12329		Sema4b	sema domain, immunoglobulin domain (Ig), transmembrane domain (TM) and short cytoplasmic domain, (semaphorin) 4B	5.77618	3.03142	-1.13918	0.960703	0.546667	0.502252
Clec3b	-0.19546	0.10051	0.266703		Sema3a	sema domain, immunoglobulin domain (Ig), short basic domain, secreted, (semaphorin) 3A	2.2495	2.02095	4.0965	-0.000847897	0.018789	-0.144336
Sdc3	-0.198972	0.246847	0.344218		Plxna2	plexin A2	3.35981	4.54713	3.28306	-0.00194932	-0.23766	-0.36538
Sema6d	-0.25391	-0.101942	0.0771681		Plxnb1	plexin B1	1.44405	3.03142	4.82802	-0.0351074	-0.273692	-0.319935
Clec2d	-0.287936	-0.561864	-0.925405		Sdc3	syndecan 3	5.16006	12.1257	9.65605	-0.198972	0.246847	0.344218
Parm1	-0.314024	-0.184506	-0.308821		Anxa9	annexin A9	1.20948	0	1.03729	-0.317112	0.252077	-0.292876
Anxa9	-0.317112	0.252077	-0.292876		Clec4e	C-type lectin domain family 4, member e	4.55473	1.11267	2.89981	4.97716	1.76796	1.21676
C1qtnf4	-0.333835	-0.768867	-1.06633		Sema7a	sema domain, immunoglobulin domain (Ig), and GPI membrane anchor, (semaphorin) 7A	1.06314	-1.47564	0	0.390241	0.12475	-0.156917
Emcn	-0.337747	0.0965986	-0.338196		Frem3	Fras1 related extracellular matrix protein 3	1.09688	1.73565	-1.32644	#N/A	#N/A	#N/A
Sema6c	-0.438642	0.648784	1.03188		Hpx	hemopexin	2.91005	0	0	1.19952	0.740593	1.72082
Cspg4	-0.474179	-0.600604	-0.815853		Sema4a	sema domain, immunoglobulin domain (Ig), transmembrane domain (TM) and short cytoplasmic domain, (semaphorin) 4A	1.14102	0	1.04042	0.978768	0.443376	0.147111
Clec14a	-0.490938	-0.150956	-0.138267		Plxna1	plexin A1	1.0539	-1.80798	2.2423	#N/A	#N/A	#N/A
Gpc3	-0.532964	0.552854	1.16204		Sema4c	sema domain, immunoglobulin domain (Ig), transmembrane domain (TM) and short cytoplasmic domain, (semaphorin) 4C	-1.14335	1.37704	0	0.569122	0.756245	0.628657
Plxdc2	-0.598523	-0.338855	-0.575399		Sema4g	sema domain, immunoglobulin domain (Ig), transmembrane domain (TM) and short cytoplasmic domain, (semaphorin) 4G	0	0	-1.28499	1.0856	1.1044	0.923014
Sema6a	-0.604235	-0.278334	-0.294902		Sema3c	sema domain, immunoglobulin domain (Ig), short basic domain, secreted, (semaphorin) 3C	-3.57415	0	-3.91973	-0.136263	-0.574849	-0.65515
C1qtnf2	-0.624318	0.132529	1.02919
Sema5a	-0.669756	-0.929066	-0.643353
Muc15	-0.688516	-0.897472	-1.10739
Plxdc1	-0.735321	-0.364666	-0.14333
Sdc2	-0.858938	0.0510248	0.139521
Frem1	-0.886198	-0.766865	-0.0733
Gpc6	-1.0178	0.998425	0.905172
Gpc4	-1.02268	0.0375675	0.16423
Sema3e	-1.02344	-1.41066	-1.19499
Frem2	-1.06457	-0.911603	-0.632839
Muc1	-1.17105	0.0705653	-0.138147
Sema3b	-1.20411	-0.295786	0.185134
Plxnb3	-1.47063	-1.89805	-1.44376
Sema5b	-1.64621	-0.649092	0.0943643
Clec3a	-1.84775	-2.03216	-1.9853
Grem1	-1.96266	-0.816342	-0.335461
Lgals3	-1.99018	0.172155	-4.38699
Lgals12	-2.43809	-1.94125	-2.55605
Sema3d	-2.51769	-1.99202	-2.3169
Anxa13	-4.09531	-2.92449	-3.44798
Matrisome associated - secreted factors	D5 Fold	D10 fold	d15 fold		Matrisome associated - secreted factors	Gene Name	7d_tpm	10d_tpm	14d_tpm	D5 Fold	D10 fold	d15 fold
Il24	13.2855	9.20982	7.78893		S100a11	S100 calcium binding protein A11 (calgizzarin)	-1.09695	-1.31408	-1.47739	#N/A	#N/A	#N/A
Fgf23	10.3204	8.98371	6.94082		S100a2	S100 calcium binding protein A2	-1.85942	-4.20094	-3.56825	#N/A	#N/A	#N/A
Il1b	10.2562	5.59692	3.2054		S100a10	S100 calcium binding protein A10 (calpactin)	-1.5782	-1.51068	-1.33869	#N/A	#N/A	#N/A
Cxcl13	9.49287	7.81935	7.52187		S100a4	S100 calcium binding protein A4	-3.37717	-61.4437	-2.83321	#N/A	#N/A	#N/A
Il1f6	8.40885	7.65321	5.26205		S100a16	S100 calcium binding protein A16	-1.18218	1.15824	1.19803	#N/A	#N/A	#N/A
Cxcl2	8.36684	3.63746	0.988571		Vwc2l	von Willebrand factor C domain-containing protein 2-like	1.47615	1.48844	1.61791	#N/A	#N/A	#N/A
Ccl4	7.47229	2.02447	-1.44543		S100a13	S100 calcium binding protein A13	1.35795	2.38655	1.12199	#N/A	#N/A	#N/A
Fasl	7.25875	0	0		Fstl1	follistatin-like 1	2.28753	3.99629	4.90766	0.633118	2.02116	2.13546
Shh	6.79556	6.02133	8.90294		Fgfbp1	fibroblast growth factor binding protein 1	1.16323	1.44872	-1.1752	0.599119	-0.216631	-0.59439
Ccl5	6.79317	4.79148	0		Ccl28	chemokine (C-C motif) ligand 28	-4.18944	-5.05571	-8.72956	#N/A	#N/A	#N/A
Cxcl5	6.54471	3.52925	1.99657		Areg	amphiregulin	1.78649	1.83301	1.974	#N/A	#N/A	#N/A
Osm	6.19576	2.59684	1.17387		Cxcl10	chemokine (C-X-C motif) ligand 10	-1.97697	-19.4628	-1.64131	#N/A	#N/A	#N/A
Ccl3	5.89225	0.972421	-1.31055		Mdk	midkine	5.72058	8.67968	8.13562	-0.151535	1.77621	2.26393
Il11	4.32383	3.52453	2.39894		Cxcl11	chemokine (C-X-C motif) ligand 11	1.2092	-5.97486	-4.0677	#N/A	#N/A	#N/A
Il6	4.16436	2.24902	2.28436		Fgf7	fibroblast growth factor 7	1.99376	2.12005	1.85064	0.525089	-0.177298	-0.726107
Il1rn	4.10611	1.41701	0.293164		Crlf1	cytokine receptor-like factor 1	1.15524	1.6976	3.28973	0.729342	1.76587	1.34418
Ccl7	3.81144	3.00108	2.47221		Ccl5	chemokine (C-C motif) ligand 5	-1.55812	-6.92744	-1.19614	6.79317	4.79148	0
Clcf1	3.41726	0.78039	0.461547		Angptl2	angiopoietin-like 2	2.91069	1.90073	1.30105	-0.18258	1.0785	1.43859
Tnfsf14	3.3603	2.66131	2.75949		Pdgfa	platelet derived growth factor, alpha	-1.21387	1.12714	1.0868	0.13724	0.102201	0.0724712
Cxcl1	3.31305	0.90766	-0.0402734		Sfrp1	secreted frizzled-related protein 1	4.22253	2.70684	2.74423	0.722359	0.336222	0.10669
Hbegf	3.25733	1.14803	0.367637		Hbegf	heparin-binding EGF-like growth factor	-2.35438	-4.47865	-2.72935	3.25733	1.14803	0.367637
Lif	2.99911	2.36748	1.97009		Sfrp2	secreted frizzled-related protein 2	7.77868	4.22663	3.90761	0.561485	2.48826	2.78808
Il1a	2.89674	1.61234	0.772876		Ntf3	neurotrophin 3	1.69269	1.37479	2.58769	-0.495373	-0.337393	-0.228702
Epgn	2.72938	0.183204	0.0398765		Il1b	interleukin 1 beta	1.58213	2.09447	1.40732	10.2562	5.59692	3.2054
Gdf15	2.64722	0.817272	-5.2547		Angptl7	angiopoietin-like 7	0.549485	0.519656	0.200416	-2.74296	-2.93457	-2.73017
Ltb	2.56745	1.35083	1.08239		Figf	c-fos induced growth factor	3.04533	6.06537	4.96043	-0.883756	-0.952627	-0.352836
Fam132b	2.56511	1.56477	1.2994		Egfl6	EGF-like-domain, multiple 6	1.09522	3.23052	4.57367	-2.92594	-2.45633	0.487808
Pf4	2.36693	1.04579	0.371792		Cxcl12	chemokine (C-X-C motif) ligand 12	-1.35839	-3.08012	-1.03412	-0.0610969	-0.69505	-1.009
Ngf	2.27836	0.411458	-0.25876		Bmp7	bone morphogenetic protein 7	1.73227	2.10378	2.02388	-0.188097	-0.243018	-0.283012
Il1f9	2.23896	1.62838	0.432244		Ccl24	chemokine (C-C motif) ligand 24	19.2871	7.07332	2.14579	-0.752878	-0.339704	-0.298546
Ccl6	2.07332	0.428893	-0.444576		Bmp2	bone morphogenetic protein 2	2.57313	2.00735	1.01342	0.816311	0.248029	0.0388838
Sfrp4	1.82475	1.96108	0.77914		Ctf1	cardiotrophin 1	1.23653	4.0419	2.63347	-0.513969	-1.06497	-1.16219
Lefty1	1.73927	1.42893	1.17874		Angptl1	angiopoietin-like 1	-3.11624	-1.48445	1.95072	-2.03437	-0.212254	0.139592
Tnf	1.69413	0.214263	0.0849591		Fst	follistatin	-2.80462	-2.22668	-1.39809	-0.0919268	-0.868793	-0.957813
Inhba	1.6073	0.104184	-0.261614		Crlf3	cytokine receptor-like factor 3	3.62427	2.49646	2.10471	0.688782	0.237648	0.106715
Ccl12	1.4281	0.30024	-0.225012		Tgfb1	transforming growth factor, beta 1	9.44767	8.33641	4.18666	#N/A	#N/A	#N/A
Tgfb3	1.37829	2.32	2.43464		Sfrp4	secreted frizzled-related protein 4	1.92539	1.89464	-1.13918	1.82475	1.96108	0.77914
Fam132a	1.13177	0.475656	-0.0909431		Fgf2	fibroblast growth factor 2	3.79182	3.03142	3.62102	-0.185948	-0.832608	-1.02608
Wnt4	1.08788	0.908916	0.680884		Wnt5b	wingless-related MMTV integration site 5B	4.86063	9.43967	5.71703	#N/A	#N/A	#N/A
Crnn	1.02436	0.487052	1.68489		Il17b	interleukin 17B	-2.77	1.13678	-3.03782	#N/A	#N/A	#N/A
Gdnf	0.959453	0.653859	0.430563		Tgfb2	transforming growth factor, beta 2	3.56198	4.54713	1.66786	-1.12296	0.37056	0.65964
Wnt2	0.937869	1.41343	0.492235		Angpt1	angiopoietin 1	2.11793	6.66913	5.4425	-0.734012	-0.0907622	-0.218327
Tnfsf8	0.846087	0.533611	0.461335		Ereg	epiregulin	3.52989	3.03142	3.8039	0.661907	0.838647	-0.0217851
Angptl6	0.819754	0.281512	0.017719		Tnfsf10	tumor necrosis factor (ligand) superfamily, member 10	1.68622	2.34064	-1.21664	#N/A	#N/A	#N/A
Bmp2	0.816311	0.248029	0.0388838		Vegfc	vascular endothelial growth factor C	2.16607	0.757855	0.219456	#N/A	#N/A	#N/A
Tgfa	0.769913	-0.208003	-0.937915		Wnt5a	wingless-related MMTV integration site 5A	5.5919	6.06284	9.23971	0.385025	1.61367	1.58298
Angpt2	0.767075	0.477678	0.584034		Hgfac	hepatocyte growth factor activator	0	6.06284	5.26693	-0.388593	-0.259117	0.00208876
Tnfsf11	0.764894	0.317288	-0.0295968		Vwc2	von Willebrand factor C domain containing 2	0	0	-1.13918	#N/A	#N/A	#N/A
Ccl2	0.76398	-0.893639	-1.99904		Mst1	macrophage stimulating 1 (hepatocyte growth factor-like)	17.2126	8.52704	5.80248	-3.82395	-4.02706	-3.98837
Angptl4	0.74481	0.280997	-0.261352		Pdgfd	platelet-derived growth factor, D polypeptide	1.43923	3.03142	2.41401	-0.856065	0.237417	0.616337
Il1f8	0.733215	0.799483	-0.280653		Hcfc2	host cell factor C2	2.30782	5.32823	5.01113	0.616398	0.381708	0.179182
Crlf1	0.729342	1.76587	1.34418		Chrdl1	chordin-like 1	-2.0775	0	-6.8351	0.402308	-0.202257	-0.48154
Sfrp1	0.722359	0.336222	0.10669		Megf6	multiple EGF-like-domains 6	4.67733	1.29918	2.79398	-0.134418	0.43713	1.40153
Crlf3	0.688782	0.237648	0.106715		Fgf12	fibroblast growth factor 12	4.89807	1.26838	1.46916	0.278188	0.150816	0.842714
Vegfa	0.674734	-0.49251	-0.658023		Fgf18	fibroblast growth factor 18	0	0	-1.13918	-1.71781	-0.930647	-1.17533
Ereg	0.661907	0.838647	-0.0217851		Il16	interleukin 16	5.77618	1.01047	-1.70877	0.466101	0.00460607	0.464402
Fstl1	0.633118	2.02116	2.13546		Wif1	Wnt inhibitory factor 1	0	4.54713	7.9004	-0.513353	-1.18112	-1.40078
Hcfc2	0.616398	0.381708	0.179182		Ngf	nerve growth factor	0	0	12.43	2.27836	0.411458	-0.25876
Pdgfc	0.60696	1.96826	2.17534		Fgf14	fibroblast growth factor 14	1.92539	3.03142	0	#N/A	#N/A	#N/A
Fgfbp1	0.599119	-0.216631	-0.59439		Il34	interleukin 34	1.92539	3.03142	3.51129	0.117061	-0.287771	-0.529898
Sfrp2	0.561485	2.48826	2.78808		Fgf3	fibroblast growth factor 3	0	0	-1.13918	#N/A	#N/A	#N/A
Dhh	0.550875	-0.519921	-2.15347		Cbln2	cerebellin 2 precursor protein	2.56719	2.02095	3.8039	#N/A	#N/A	#N/A
Fgf7	0.525089	-0.177298	-0.726107		Wnt3	wingless-related MMTV integration site 3	4.81349	0	-1.13918	-0.683059	-0.407134	-0.551212
Hcfc1	0.515143	0.342263	0.332886		Wnt11	wingless-related MMTV integration site 11	-1.03875	0	-1.13918	-1.07604	-0.498284	-0.362777
Fgf5	0.504961	2.00206	1.82536		Wnt10a	wingless related MMTV integration site 10a	1.97088	0	-1.44676	#N/A	#N/A	#N/A
Ccl19	0.472159	-0.483674	-0.820284		Megf11	multiple EGF-like-domains 11	25.0494	18.1885	10.5339	0.206056	2.18712	1.54174
Il16	0.466101	0.00460607	0.464402		Nrg1	neuregulin 1	2.88809	0	2.63347	#N/A	#N/A	#N/A
Wnt2b	0.440483	2.61798	3.02251		Inhbb	inhibin beta-B	3.85079	0	-1.13918	-0.225993	-0.448949	-1.24848
Ntf5	0.413542	-0.699758	-1.69336		Wfikkn2	WAP, follistatin/kazal, immunoglobulin, kunitz and netrin domain containing 2	2.74369	0	4.38911	-8.9178	-3.11686	-2.15549
Chrdl1	0.402308	-0.202257	-0.48154		Pdgfc	platelet-derived growth factor, C polypeptide	7.70158	3.03142	19.3121	0.60696	1.96826	2.17534
Wnt5a	0.385025	1.61367	1.58298		Fgf10	fibroblast growth factor 10	11.5524	12.1257	13.1673	#N/A	#N/A	#N/A
Tnfsf15	0.380623	0.0413618	-6.59216		Fgfbp3	fibroblast growth factor binding protein 3	0	0	2.71491	-0.776901	-0.792346	-0.175646
Ccbe1	0.379282	1.21824	1.44129		Cxcl14	chemokine (C-X-C motif) ligand 14	12.3033	24.2514	13.457	0.297834	0.411954	0.48874
Ptn	0.343919	2.66042	2.84092		Bmp5	bone morphogenetic protein 5	-3.15602	1.99548	1.15568	-0.585051	-0.722832	-0.653174
Tnfsf13	0.302158	-0.233184	-0.598678		Wnt7a	wingless-related MMTV integration site 7A	1.70007	0	0	-5.80496	-1.23373	-0.721126
Cxcl14	0.297834	0.411954	0.48874		Fgf13	fibroblast growth factor 13	0	0	-1.46634	-1.53543	-0.514765	-0.292453
Igf1	0.29608	0.205094	0.578166		Fgf8	fibroblast growth factor 8	1.17262	18.4623	13.9001	#N/A	#N/A	#N/A
Fgf12	0.278188	0.150816	0.842714		Fgf9	fibroblast growth factor 9	-1.07248	0	1.70042	-3.23431	-3.70362	-3.0491
Fgf22	0.270792	0.658818	-0.142527		Gdf5	growth differentiation factor 5	0	3.66203	2.12086	-0.259304	-1.33866	-0.43439
Csf1	0.266181	-0.132894	-0.0845948		Hcfc1	host cell factor C1	1.2239	-2.0758	1.2555	0.515143	0.342263	0.332886
Wnt16	0.226293	0.181151	0.377166		Hgf	hepatocyte growth factor	-1.80243	0	-1.9767	-0.0386693	0.217999	-0.553512
Cntf	0.222686	-0.0680355	-0.0922724		Hrnr	hornerin	7.90718	7.27868	0	-0.489687	0.732538	-0.0954778
Megf11	0.206056	2.18712	1.54174		Il10	interleukin 10	0	0	-1.01555	#N/A	#N/A	#N/A
Tnfsf13b	0.166798	0.0268167	-0.23055		Il11	interleukin 11	21.7347	5.6562	-1.83162	4.32383	3.52453	2.39894
Il7	0.158838	0.344343	0.530314		Tnfsf12	tumor necrosis factor (ligand) superfamily, member 12	6.6002	0	7.79359	#N/A	#N/A	#N/A
Pdgfa	0.13724	0.102201	0.0724712		Lep	leptin	5.2586	22.7682	4.26154	-4.49916	-4.06084	-3.32353
Fgf21	0.125743	-0.323744	-0.203034		Megf8	multiple EGF-like-domains 8	0.494241	0	-4.43787	0.123306	0.661539	0.922937
Ifne	0.125743	2.67665	3.50795		Megf9	multiple EGF-like-domains 9	1.19244	0	0	-0.0922502	-0.40777	-0.524596
Megf8	0.123306	0.661539	0.922937		S100a1	S100 calcium binding protein A1	6.28464	0	0	#N/A	#N/A	#N/A
Il34	0.117061	-0.287771	-0.529898		S100b	S100 protein, beta polypeptide, neural	0	0	1.81924	#N/A	#N/A	#N/A
Nrtn	0.063479	0.523397	0.579591		Scube2	signal peptide, CUB domain, EGF-like 2	-3.52454	0	-3.86532	-0.0789095	3.45425	3.45211
Cxcl9	0.0147093	-0.249754	0.182991		Scube3	signal peptide, CUB domain, EGF-like 3	2.66909	1.68093	0	-0.776495	0.355855	1.12163
Tchhl1	0	0	0		Shh	sonic hedgehog	0	17.3778	8.42741	6.79556	6.02133	8.90294
Angpt4	-0.00236485	-0.22366	-2.47244		Tgfb3	transforming growth factor, beta 3	5.5517	17.4817	3.79669	1.37829	2.32	2.43464
Hgf	-0.0386693	0.217999	-0.553512
Nrg4	-0.0466985	-0.854928	-1.20694
Cxcl12	-0.0610969	-0.69505	-1.009
Scube2	-0.0789095	3.45425	3.45211
Kitl	-0.0873883	-0.694121	-0.850009
Fst	-0.0919268	-0.868793	-0.957813
Megf9	-0.0922502	-0.40777	-0.524596
Il1f5	-0.0960398	0.0769579	-0.278521
Pik3ip1	-0.112368	0.0152762	0.0913545
Eda	-0.128025	0.331455	0.51763
Megf6	-0.134418	0.43713	1.40153
Fgf11	-0.148013	0.630564	1.01397
Mdk	-0.151535	1.77621	2.26393
Cx3cl1	-0.173215	0.00149733	-0.221382
Angptl2	-0.18258	1.0785	1.43859
Fgf2	-0.185948	-0.832608	-1.02608
Bmp7	-0.188097	-0.243018	-0.283012
Inhbb	-0.225993	-0.448949	-1.24848
Egfl7	-0.232968	-0.338351	-0.471278
Wnt7b	-0.2362	-0.295401	-0.671054
Gdf5	-0.259304	-1.33866	-0.43439
Fstl3	-0.278751	-0.196182	-0.663412
Wfikkn1	-0.294918	-0.0531668	0.49242
Ccl22	-0.304021	0.241562	0.241251
Egfl8	-0.354755	-0.261594	-0.225761
Pdgfb	-0.36835	-0.132003	-0.227098
Hgfac	-0.388593	-0.259117	0.00208876
Il15	-0.397966	-0.209999	-0.670037
Flt3l	-0.409025	-0.121511	0.0293498
Ccl11	-0.433563	0.12645	0.0559816
Vegfb	-0.45676	-0.783253	-0.426367
Wnt6	-0.459194	-0.729894	-0.418136
Hrnr	-0.489687	0.732538	-0.0954778
Ntf3	-0.495373	-0.337393	-0.228702
Wif1	-0.513353	-1.18112	-1.40078
Ctf1	-0.513969	-1.06497	-1.16219
Fgf1	-0.540168	-1.58961	-0.422073
Btc	-0.56594	-0.394869	-1.5932
Bmp5	-0.585051	-0.722832	-0.653174
Hhip	-0.60606	-0.637029	-0.0284181
Il23a	-0.651442	-2.14225	-1.1441
Wnt3	-0.683059	-0.407134	-0.551212
Bmp3	-0.707485	-0.790611	-1.07963
Angpt1	-0.734012	-0.0907622	-0.218327
Ccl24	-0.752878	-0.339704	-0.298546
Wnt9a	-0.774861	0.586691	1.05643
Scube3	-0.776495	0.355855	1.12163
Fgfbp3	-0.776901	-0.792346	-0.175646
Fgf16	-0.840596	0.23839	-0.605946
Il18	-0.854614	-0.538854	-0.842869
Pdgfd	-0.856065	0.237417	0.616337
Figf	-0.883756	-0.952627	-0.352836
Artn	-0.896333	-1.06819	-2.17277
Inha	-1.04189	-0.203853	0.252567
Ism1	-1.04228	-1.49197	-1.44407
Csf3	-1.07382	-7.56471	-7.52212
Wnt11	-1.07604	-0.498284	-0.362777
Pgf	-1.10137	-0.81037	-0.439266
Chrd	-1.10611	0.0262471	0.224333
Tgfb2	-1.12296	0.37056	0.65964
Igf2	-1.38906	0.978512	1.42693
Sfrp5	-1.48694	-1.83275	-2.69674
Nrg2	-1.49026	-2.05666	-2.07879
Il17d	-1.51377	-1.80783	-1.27125
Fgf13	-1.53543	-0.514765	-0.292453
Bdnf	-1.5432	-0.785422	-0.433012
Egf	-1.5483	-1.59744	-1.79881
Bmp4	-1.65293	-1.74936	-0.95608
Fgf18	-1.71781	-0.930647	-1.17533
Gdf1	-1.78624	-1.80557	-1.57543
Flg	-1.80536	-1.18556	-2.42076
Scube1	-1.8122	-2.0899	-2.07365
Frzb	-2.0091	-2.4219	-2.12463
Angptl1	-2.03437	-0.212254	0.139592
Tchh	-2.2771	1.09168	-1.11035
Angptl7	-2.74296	-2.93457	-2.73017
Egfl6	-2.92594	-2.45633	0.487808
Fgf9	-3.23431	-3.70362	-3.0491
Mst1	-3.82395	-4.02706	-3.98837
Lep	-4.49916	-4.06084	-3.32353
Bmp8a	-5.08342	-5.29489	0.00734147
Mstn	-5.09201	-3.83272	-3.50932
Wnt7a	-5.80496	-1.23373	-0.721126
Chrdl2	-6.28212	-1.24575	-6.46114
Rptn	-7.05115	-2.47557	-0.285259
Wfikkn2	-8.9178	-3.11686	-2.15549
Matrisome associated - regulators	D5 Fold	D10 fold	d15 fold		Matrisome associated - regulators	Gene Name	7d_tpm	10d_tpm	14d_tpm	D5 Fold	D10 fold	d15 fold
Adamdec1	10.1697	9.84683	8.62281		Cstb	cystatin B	1.07506	1.4692	1.00869	1.90142	0.854925	0.345296
Tgm4	7.26048	6.86066	0		Serpinf1	serine (or cysteine) peptidase inhibitor, clade F, member 1	-2.78345	-4.75526	-4.47224	-0.748519	0.465945	0.431308
Ctse	6.63637	2.74055	1.03168		Cst3	cystatin C	-1.55966	-2.55447	-2.62651	-2.42861	1.00149	-1.09399
Mmp13	6.54077	7.22953	6.1082		Ctsh	cathepsin H	-2.27399	-4.97972	-8.4028	1.28346	0.891447	0.4262
Slpi	6.43664	2.99798	2.49665		Ctsb	cathepsin B	2.25991	2.22138	2.15615	1.53201	0.949286	0.646093
Mmp3	5.84144	4.03898	2.36779		Serpinb5	serine (or cysteine) peptidase inhibitor, clade B, member 5	1.70351	1.68714	1.3876	0.0585074	-0.103535	-0.50086
Astl	5.12235	0	7.62646		Adam10	a disintegrin and metallopeptidase domain 10	1.31906	1.59667	1.35399	#N/A	#N/A	#N/A
Mmp9	4.86926	4.8571	3.55368		Ctss	cathepsin S	-1.13864	-2.69697	-4.0618	3.47477	1.95114	1.36743
Serpinb9	4.58022	3.50848	2.21157		Serpinh1	serine (or cysteine) peptidase inhibitor, clade H, member 1	-1.0705	1.16578	-1.47087	1.12085	2.15296	2.12108
Serpinb3a	4.57869	2.62014	4.71419		Serpine2	serine (or cysteine) peptidase inhibitor, clade E, member 2	1.26447	1.52868	1.53965	-0.233281	-0.176817	-0.138655
Mmp25	4.20377	2.42252	2.3263		Ctsk	cathepsin K	2.9449	11.1144	7.14925	2.08793	1.86553	1.53571
Tgm3	4.11607	2.81638	2.4032		Ctsg	cathepsin G	-1.08314	-2.48618	-9.65884	#N/A	#N/A	#N/A
Serpine1	3.96291	3.06447	1.63177		Tgm3	transglutaminase 3, E polypeptide	18.2307	21.9976	9.73527	4.11607	2.81638	2.4032
Ctss	3.47477	1.95114	1.36743		Htra1	HtrA serine peptidase 1	-1.14421	-1.97188	-2.57105	0.843639	1.35353	1.44795
Cela1	3.0292	3.11405	4.33658		Tgm6	transglutaminase 6	12.3267	16.2373	6.75477	#N/A	#N/A	#N/A
Adam8	3.02129	0.725978	0.310517		F10	coagulation factor X	-1.88246	-2.35009	-1.58882	#N/A	#N/A	#N/A
Timp1	3.01588	2.18109	1.18129		Ctsc	cathepsin C	2.63835	2.48507	2.31755	1.37732	0.750196	0.769128
Hyal1	2.97658	1.23056	0.284339		Cst6	cystatin E/M	1.05938	-1.24014	-1.23422	-0.838288	-1.26874	-1.53403
Tll2	2.9371	3.0788	2.57928		Ctsd	cathepsin D	1.85773	1.7622	1.81218	-2.17862	0.349202	-1.52929
Ctsz	2.59016	1.77782	1.20225		Timp1	tissue inhibitor of metalloproteinase 1	7.56777	4.36115	1.2886	3.01588	2.18109	1.18129
Serpina3a	2.3946	1.90161	-0.0243462		P4ha1	procollagen-proline, 2-oxoglutarate 4-dioxygenase (proline 4-hydroxylase), alpha 1 polypeptide	1.10239	2.10384	1.87756	0.38597	0.342593	0.263341
Mmp19	2.13263	2.69889	2.67181		Plau	plasminogen activator, urokinase	1.85322	-1.05455	-1.79659	1.51101	0.919517	0.518646
Ctsk	2.08793	1.86553	1.53571		P4ha2	procollagen-proline, 2-oxoglutarate 4-dioxygenase (proline 4-hydroxylase), alpha II polypeptide	-1.24025	-1.14249	-1.23361	0.175716	1.19266	1.06317
Mmp8	2.0159	0.262274	-0.291339		Serpini1	serine (or cysteine) peptidase inhibitor, clade I, member 1	-1.20935	-1.14114	-1.12168	-1.64042	-1.18003	-0.879574
P4ha3	1.95803	4.02723	4.22165		Mmp2	matrix metallopeptidase 2	6.45687	7.39435	4.60345	1.16891	1.44499	1.28298
Cstb	1.90142	0.854925	0.345296		Ctsz	cathepsin Z	3.37686	3.02704	2.66603	2.59016	1.77782	1.20225
Adamts8	1.87763	0.423837	0.0700132		Adam17	a disintegrin and metallopeptidase domain 17	1.52127	1.8819	1.75696	1.03493	0.305953	0.246506
Serpina9	1.83109	0.675817	0.566786		Ctso	cathepsin O	-1.13342	-2.07701	-1.5621	0.229822	-0.0274908	-0.105794
Adam19	1.73875	1.68152	1.40367		Lepre1	leprecan 1	1.89922	2.77678	2.16571	0.390716	1.35536	1.58604
A2m	1.67831	1.88812	1.71609		Sulf2	sulfatase 2	3.31118	3.02847	1.80461	#N/A	#N/A	#N/A
Serpinb1a	1.67253	0.924811	0.487666		Fam20c	family with sequence similarity 20, member c	-1.73104	1.27228	-1.61365	#N/A	#N/A	#N/A
Serpina3n	1.57446	1.30546	0.779523		Ctsa	cathepsin A	2.5916	3.12027	3.43391	0.459692	0.523525	0.164241
Mmp12	1.56254	3.65479	3.03672		Serpinb10	serine (or cysteine) peptidase inhibitor, clade B (ovalbumin), member 10	7.41835	3.41065	2.12813	#N/A	#N/A	#N/A
Ctsb	1.53201	0.949286	0.646093		Itih5	inter-alpha (globulin) inhibitor H5	-2.3695	-6.7724	-3.8979	-1.11296	-0.191658	0.416314
Plau	1.51101	0.919517	0.518646		Loxl1	lysyl oxidase-like 1	1.34369	1.46978	1.11723	0.0147295	0.909812	0.780783
Tgm2	1.4534	1.17424	0.691496		Mmp14	matrix metallopeptidase 14 (membrane-inserted)	9.38738	8.85591	6.68713	0.79664	1.8676	2.06128
Ctsc	1.37732	0.750196	0.769128		Timp3	tissue inhibitor of metalloproteinase 3	-2.38927	-1.24063	-1.1495	-1.89532	-2.08083	-1.99302
Ctsh	1.28346	0.891447	0.4262		Plod1	procollagen-lysine, 2-oxoglutarate 5-dioxygenase 1	2.83303	3.46764	3.7985	0.541691	0.856617	0.854712
Plat	1.23894	2.39867	1.70713		Mmp3	matrix metallopeptidase 3	5.29841	2.1679	1.24457	5.84144	4.03898	2.36779
Hyal2	1.217	0.849376	0.6681		F13a1	coagulation factor XIII, A1 subunit	6.74503	13.0456	20.5673	-0.544017	-0.72638	-0.900687
Plod3	1.18342	1.41207	1.37651		Plod2	procollagen lysine, 2-oxoglutarate 5-dioxygenase 2	1.177	-1.37149	2.57203	0.13482	1.00104	0.576001
Ctsl	1.17435	0.734273	0.154146		Egln1	EGL nine homolog 1 (C. elegans)	3.11967	3.21423	2.9668	0.344428	0.166883	0.00437511
Mmp2	1.16891	1.44499	1.28298		A2m	alpha-2-macroglobulin	2.53597	2.09991	-1.16473	1.67831	1.88812	1.71609
Pappa2	1.15011	-0.542286	-0.229353		Serping1	serine (or cysteine) peptidase inhibitor, clade G, member 1	1.44646	4.55472	3.07751	0.134386	0.420166	0.216531
Adamts4	1.135	2.21956	1.9728		Ogfod1	2-oxoglutarate and iron-dependent oxygenase domain containing 1	1.89777	2.54563	2.15063	#N/A	#N/A	#N/A
Serpinh1	1.12085	2.15296	2.12108		Pcsk5	proprotein convertase subtilisin/kexin type 5	2.18094	2.76239	-1.43765	0.139115	1.86964	1.6523
Adam12	1.03608	2.67742	2.81914		Ogfod2	2-oxoglutarate and iron-dependent oxygenase domain containing 2	-1.93986	2.43488	-8.50969	0.265483	-0.0780788	0.0977717
Adam17	1.03493	0.305953	0.246506		Mmp19	matrix metallopeptidase 19	5.96568	4.13772	3.77489	2.13263	2.69889	2.67181
Hyal3	1.03421	0.131683	-0.228853		Pamr1	peptidase domain containing associated with muscle regeneration 1	4.53616	4.78032	5.89593	0.614027	2.04411	2.43881
Loxl3	1.00344	1.28113	1.51749		Masp2	mannan-binding lectin serine peptidase 2	4.10831	3.71349	2.83976	-0.766062	1.30018	-6.0707
Tgm1	0.96051	0.439678	-0.1161		Serpinf2	serine (or cysteine) peptidase inhibitor, clade F, member 2	1.83543	-1.36664	-2.54125	#N/A	#N/A	#N/A
Tgm5	0.950279	0.356398	-0.273864		Ngly1	N-glycanase 1	2.90219	2.27357	2.76075	-0.147734	-0.0917099	-0.119881
Serpinc1	0.904452	0.897362	0.709522		Loxl2	lysyl oxidase-like 2	2.52165	2.90065	3.01407	-0.00807667	1.25926	1.40637
Htra1	0.843639	1.35353	1.44795		Kazald1	Kazal-type serine peptidase inhibitor domain 1	105.821	119.387	52.6958	-0.299228	-0.225658	-0.62293
Mmp14	0.79664	1.8676	2.06128		Adam9	a disintegrin and metallopeptidase domain 9 (meltrin gamma)	3.36382	2.63481	2.04752	0.70929	0.902093	0.82053
Mmp17	0.789558	1.3688	1.34828		Mmp8	matrix metallopeptidase 8	37.8245	8.91818	2.41047	2.0159	0.262274	-0.291339
Egln2	0.742588	0.403443	0.476525		Mmp28	matrix metallopeptidase 28 (epilysin)	1.92539	1.81885	1.05339	-0.518093	-1.06992	-1.35795
Adam9	0.70929	0.902093	0.82053		Adamts12	a disintegrin-like and metallopeptidase (reprolysin type) with thrombospondin type 1 motif, 12	-1.55812	-1.48445	-10.2526	-0.64531	0.696432	0.642175
Masp1	0.696419	-0.744121	-1.6745		Timp2	tissue inhibitor of metalloproteinase 2	7.35167	6.34551	7.76885	-0.126122	0.518106	0.777946
Adamts9	0.686063	1.44624	1.45166		Lox	lysyl oxidase	14.529	11.5194	1.58008	-0.514034	0.820251	0.51269
Pamr1	0.614027	2.04411	2.43881		Serpinb8	serine (or cysteine) peptidase inhibitor, clade B, member 8	10.547	13.1444	8.51936	-0.0632684	0.107317	-0.634317
Htra4	0.566964	-0.329271	-1.48677		Pzp	pregnancy zone protein	-1.29844	-1.64939	1.05339	#N/A	#N/A	#N/A
Plod1	0.541691	0.856617	0.854712		Mmp16	matrix metallopeptidase 16	1.74859	2.14127	2.48022	#N/A	#N/A	#N/A
Bmp1	0.478413	1.60742	1.68008		Bmp1	bone morphogenetic protein 1	2.00927	2.27327	1.44815	0.478413	1.60742	1.68008
Serpinb6a	0.463231	-0.0283087	-0.716556		Adamts5	a disintegrin-like and metallopeptidase (reprolysin type) with thrombospondin type 1 motif, 5 (aggrecanase-2)	-2.59687	-1.64939	-5.69591	-0.809048	0.31431	-0.344343
Ctsa	0.459692	0.523525	0.164241		Adamts3	a disintegrin-like and metallopeptidase (reprolysin type) with thrombospondin type 1 motif, 3	1.78247	1.20694	-1.12542	-0.288368	0.863547	0.496544
Adamts6	0.456275	1.58104	1.32477		Sulf1	sulfatase 1	12.447	10.4511	4.977	0.321921	0.706421	0.405431
Mmp11	0.410755	4.16329	4.50666		Timp4	tissue inhibitor of metalloproteinase 4	5.29483	3.03142	1.75564	-1.58144	-1.92791	-1.31552
Lepre1	0.390716	1.35536	1.58604		Leprel1	leprecan-like 1	-1.55812	2.02095	-1.13918	-0.0136529	-0.753895	-0.807816
P4ha1	0.38597	0.342593	0.263341		Adam28	a disintegrin and metallopeptidase domain 28	7.23705	3.54888	1.2896	0.223047	1.38011	1.46056
Egln1	0.344428	0.166883	0.00437511		Tgm2	transglutaminase 2, C polypeptide	5.09588	0	2.48716	1.4534	1.17424	0.691496
Adamts16	0.342985	3.11485	3.12835		F13b	coagulation factor XIII, beta subunit	2.34148	6.32231	4.37126	#N/A	#N/A	#N/A
Sulf1	0.321921	0.706421	0.405431		Mmp13	matrix metallopeptidase 13	34.3165	23.5877	8.08037	6.54077	7.22953	6.1082
Egln3	0.320187	0.0726986	-0.128863		Serpina9	serine (or cysteine) peptidase inhibitor, clade A (alpha-1 antiproteinase, antitrypsin), member 9	1.91066	-7.18402	0	1.83109	0.675817	0.566786
Ogfod2	0.265483	-0.0780788	0.0977717		Cd109	CD109 antigen	1.44405	4.59071	2.06617	#N/A	#N/A	#N/A
St14	0.250256	-0.299032	-0.618857		Hyal3	hyaluronoglucosaminidase 3	1.92539	0	0	1.03421	0.131683	-0.228853
Hpse	0.247051	0.276004	-0.245269		Hpse	heparanase	3.85079	0	0	0.247051	0.276004	-0.245269
Adam15	0.230512	0.202413	0.0812431		Adamts2	a disintegrin-like and metallopeptidase (reprolysin type) with thrombospondin type 1 motif, 2	-1.03875	0	-1.13918	-0.165135	1.17556	1.48607
Ctso	0.229822	-0.0274908	-0.105794		Adamts1	a disintegrin-like and metallopeptidase (reprolysin type) with thrombospondin type 1 motif, 1	13.7714	5.30499	4.38911	-0.630573	-0.198423	0.0631134
Adam28	0.223047	1.38011	1.46056		Mep1b	meprin 1 beta	-1.03875	0	0	#N/A	#N/A	#N/A
Mmp21	0.206056	-0.341707	-5.09201		P4ha3	procollagen-proline, 2-oxoglutarate 4-dioxygenase (proline 4-hydroxylase), alpha polypeptide III	4.86211	9.18613	1.77338	1.95803	4.02723	4.22165
Kng2	0.192755	-0.90639	-1.71245		Tll2	tolloid-like 2	3.85079	3.03142	2.63347	2.9371	3.0788	2.57928
P4ha2	0.175716	1.19266	1.06317		Plat	plasminogen activator, tissue	7.05978	2.02095	1.46304	1.23894	2.39867	1.70713
Pcsk5	0.139115	1.86964	1.6523		Adamts7	a disintegrin-like and metallopeptidase (reprolysin type) with thrombospondin type 1 motif, 7	1.92539	0	-2.27837	0.1175	1.82695	2.17227
Plod2	0.13482	1.00104	0.576001		Loxl3	lysyl oxidase-like 3	1.92539	3.03142	-1.13918	1.00344	1.28113	1.51749
Serping1	0.134386	0.420166	0.216531		Serpine1	serine (or cysteine) peptidase inhibitor, clade E, member 1	11.5524	3.03142	3.51129	3.96291	3.06447	1.63177
Serpinb2	0.131768	-0.179612	-0.914796		Mmp9	matrix metallopeptidase 9	66.162	17.5	20.5058	4.86926	4.8571	3.55368
Adamts7	0.1175	1.82695	2.17227		Adamtsl2	ADAMTS-like 2	2.88809	12.1257	13.1673	-4.91629	-5.13319	1.54174
Serpinb5	0.0585074	-0.103535	-0.50086		Mmp17	matrix metallopeptidase 17	1.92539	3.03142	1.75564	0.789558	1.3688	1.34828
Adam23	0.0571311	2.29472	2.88991		Plod3	procollagen-lysine, 2-oxoglutarate 5-dioxygenase 3	4.81349	6.06284	7.9004	1.18342	1.41207	1.37651
Loxl1	0.0147295	0.909812	0.780783		St14	suppression of tumorigenicity 14 (colon carcinoma)	10.5849	4.54713	4.8368	0.250256	-0.299032	-0.618857
Loxl2	-0.00807667	1.25926	1.40637		Mmp10	matrix metallopeptidase 10	81.7876	33.4053	3.79468	#N/A	#N/A	#N/A
Leprel1	-0.0136529	-0.753895	-0.807816		Astl	astacin-like metalloendopeptidase (M12 family)	32.6707	5.05237	2.04825	5.12235	0	7.62646
Leprel2	-0.0253903	1.23614	1.6608		Adam15	a disintegrin and metallopeptidase domain 15 (metargidin)	0	4.01499	0	0.230512	0.202413	0.0812431
Serpinb8	-0.0632684	0.107317	-0.634317		Tgm1	transglutaminase 1, K polypeptide	2.51227	3.95542	3.43617	0.96051	0.439678	-0.1161
Timp2	-0.126122	0.518106	0.777946		Tgm5	transglutaminase 5	1.11448	16.962	4.91176	0.950279	0.356398	-0.273864
Ctsw	-0.136077	-1.22337	-0.246099		Adam8	a disintegrin and metallopeptidase domain 8	9.23998	18.871	4.471	3.02129	0.725978	0.310517
Ngly1	-0.147734	-0.0917099	-0.119881		Adamts16	a disintegrin-like and metallopeptidase (reprolysin type) with thrombospondin type 1 motif, 16	-2.11425	0	1.29384	0.342985	3.11485	3.12835
Adamts2	-0.165135	1.17556	1.48607		Adamts17	a disintegrin-like and metallopeptidase (reprolysin type) with thrombospondin type 1 motif, 17	0	4.17861	0	-0.875593	0.648701	1.91332
Ctsf	-0.217923	-0.280476	-0.66621		Adamts18	a disintegrin-like and metallopeptidase (reprolysin type) with thrombospondin type 1 motif, 18	-2.71427	1.16012	-2.97671	-0.314842	1.03896	2.47924
Serpine2	-0.233281	-0.176817	-0.138655		Adamts4	a disintegrin-like and metallopeptidase (reprolysin type) with thrombospondin type 1 motif, 4	-1.15122	2.73525	-3.7876	1.135	2.21956	1.9728
Adamts3	-0.288368	0.863547	0.496544		Tgm7	transglutaminase 7	7.62734	0	-1.15027	#N/A	#N/A	#N/A
Adamtsl4	-0.297729	-0.350753	0.0650155		Cela3b	chymotrypsin-like elastase family, member 3B	1.18909	3.74432	-1.51195	#N/A	#N/A	#N/A
Kazald1	-0.299228	-0.225658	-0.62293		Cpn2	carboxypeptidase N, polypeptide 2	1.92592	0	1.05368	-1.66705	-0.883247	-1.17051
Adamts18	-0.314842	1.03896	2.47924		Ctsf	cathepsin F	0	0	-1.00778	-0.217923	-0.280476	-0.66621
Itih4	-0.315409	-0.492155	-1.03829		F7	coagulation factor VII	0	0	1.09347	#N/A	#N/A	#N/A
Mmp15	-0.335455	-0.315758	-0.265869		Fam20a	family with sequence similarity 20, member a	-1.00634	6.25811	-1.10364	#N/A	#N/A	#N/A
Hyal4	-0.4056	0.0488866	-0.238471		Hyal1	hyaluronoglucosaminidase 1	-1.278	6.15979	4.63766	2.97658	1.23056	0.284339
Adam1b	-0.461397	0.323564	-1.38409		Hyal2	hyaluronoglucosaminidase 2	-1.39848	1.12583	-1.02246	1.217	0.849376	0.6681
Agt	-0.476005	-0.580049	-0.899322		Hyal4	hyaluronoglucosaminidase 4	-1.13154	16.697	47.7056	-0.4056	0.0488866	-0.238471
Lox	-0.514034	0.820251	0.51269		Leprel2	leprecan-like 2	2.52476	2.65005	3.06955	-0.0253903	1.23614	1.6608
Mmp28	-0.518093	-1.06992	-1.35795		Masp1	mannan-binding lectin serine peptidase 1	-1.11973	2.81219	-3.68397	0.696419	-0.744121	-1.6745
F13a1	-0.544017	-0.72638	-0.900687		Mmp11	matrix metallopeptidase 11	-1.43155	0	2.54783	0.410755	4.16329	4.50666
Mmp27	-0.560802	-0.784414	0.575555		Mmp12	matrix metallopeptidase 12	266.702	7.58451	1.64721	1.56254	3.65479	3.03672
Mmp23	-0.572738	1.76589	2.17397		Mmp24	matrix metallopeptidase 24	0	1.23883	1.0762	#N/A	#N/A	#N/A
Pappa	-0.605831	0.558471	0.679689		Pcsk6	proprotein convertase subtilisin/kexin type 6	2.09563	3.26645	3.82175	-0.618569	-0.509953	-0.688206
Pcsk6	-0.618569	-0.509953	-0.688206
Adamts1	-0.630573	-0.198423	0.0631134
Adamts12	-0.64531	0.696432	0.642175
Htra3	-0.653646	-0.165698	-0.461112
Tll1	-0.684064	-0.391766	-0.420198
Serpinf1	-0.748519	0.465945	0.431308
Masp2	-0.766062	1.30018	-6.0707
Adamts19	-0.781545	3.45932	4.82565
Serpinb12	-0.782067	-0.15088	0.0100815
Adam22	-0.803483	-0.332934	0.295405
Adamts5	-0.809048	0.31431	-0.344343
Cst6	-0.838288	-1.26874	-1.53403
Adamts17	-0.875593	0.648701	1.91332
Adam11	-0.964417	-0.83109	-0.735627
P4htm	-1.10887	-1.07201	-0.602499
Itih5	-1.11296	-0.191658	0.416314
Adamtsl1	-1.19487	-0.54264	0.647369
Serpinb7	-1.32765	-1.24394	-1.3749
F2	-1.35043	-0.418805	-0.000352065
Serpina12	-1.43939	-0.866084	-1.50221
Loxl4	-1.50041	-1.59166	-1.74425
Adamtsl3	-1.53424	-0.956087	-0.619174
Serpina1c	-1.54634	-1.67385	-1.72861
Timp4	-1.58144	-1.92791	-1.31552
Prss12	-1.59971	-1.16496	-1.044
Serpini1	-1.64042	-1.18003	-0.879574
Cpn2	-1.66705	-0.883247	-1.17051
Serpinb13	-1.74763	-1.62092	-1.70151
Timp3	-1.89532	-2.08083	-1.99302
Adamts14	-2.14986	-0.0948239	0.161171
Ctsd	-2.17862	0.349202	-1.52929
Serpinb11	-2.35133	-1.35334	-2.22862
Cst3	-2.42861	1.00149	-1.09399
Ky	-3.53051	-2.44691	-2.25855
Adamtsl2	-4.91629	-5.13319	1.54174

## Sheet: 2. GAG Stewart vs Gawriluk
Preparation of Linkage region
Gene symbol	Gene name	Axolotl d5 FC	Axolotl d10 FC	Axolotl d14 FC	Acomys D5	Acomys D10	Acomys D15
B3gat3	3-beta-glucoronosyltransferase 3	2.68	1.52	1.76	0.1	0.18	0.08
B4galt2	Beta-1,4-galactosyltransferase 2	1.12	2.87	1.48	1.52	1.83	1.81
B4galt7	Beta-1,4-galactosyltransferase 7	4.69	5.3	4.19	0.22	0.54	0.41
Glycosaminoglycan chain polimerisation
Gene symbol	Gene name	d5 FC	d10 FC	d14 FC	Acomys D5	Acomys D10	Acomys D15
Chpf	Chondroitin polymerizing factor	3.09	4.58	2.92	-0.04	0.95	1.1
Chsy1	Chondroitin sulfate synthase 1	8.6	14.9	8.15	1.13	1.62	1.67
Chsy3	Chondroitin sulfate synthase 3	1.23	1.75	3.17	0.43	1.5	1.35
Ext1	Exostosin glycosyltransferase 1	2.92	3.08	1.9	0.82	0.65	0.53
Ext2	Exostosin glycosyltransferase 2	2.63	2.34	5.37	0.78	1.08	1
Extl2	Exostosin like glycosyltransferase 2	2.22	3.03	2.83	-0.08	0.12	0.3
Extl3	Exostosin like glycosyltransferase 3	6.52	6.31	5.9	0.31	0.15	0.17
Has1	Hyaluronan synthase 1	1.26	-1.26	-2.18	1.91	-1.09	-0.02
Has2	Hyaluronan synthase 2	6.13	7.58	3.71	2.28	1.6	1.59
Glycsaminoglycan chain modification
Gene symbol	Gene name	d5 FC	d10 FC	d14 FC	Acomys D5	Acomys D10	Acomys D15
Hs2st1	Heparan sulfate 2-O-sulfotransferase 1	-1.2	-1.08	-1.29	0.44	0.68	0.85
Chst3	Carbohydrate sulfotransferase 3	0	0	0	0.97	1.12	0.98
Ndst1	N-deacetylase and N-sulfotransferase 1	-1.14	1.85	1.07	0.53	0.83	0.88
Chst15	Carbohydrate sulfotransferase 15	1.22	0	1.12	-0.61	-0.72	-0.79
Chst14	Carbohydrate sulfotransferase 14	1.53	1.23	1.24	0.85	1.3	1.42
Chst12	Carbohydrate sulfotransferase 12	1.88	1.58	1.4	0.84	0.55	0.52
Ndst2	N-deacetylase and N-sulfotransferase 2	-1.85	0	1.48	0.31	0.4	0.49
Sumf1	Sulfatase modifying factor 1	1.18	1.62	1.58	0	0.18	0.08
Hs3st1	Heparan sulfate 3-O-sulfotransferase 1	2.51	1.13	-1.14	0.87	0.3	-0.19
Hs6st1	Heparan sulfate-glucosamine 6-sulfotransferase 1	2.99	-1.5	-1.03	0.52	0.23	0.02
Glce	Glucuronic acid epimerase	2.45	1.94	1.26	0.17	0.1	0.15
Sumf2	Sulfatase modifying factor 2	1.64	2.43	2.46	-0.41	-0.22	-0.43
Chst11	Carbohydrate sulfotransferase 11	2.41	1.52	4.39	1.1	0.51	0.45
Sulf1	Sulfatase 1	12.45	10.45	4.98	0.32	0.71	0.41
Chst2	Carbohydrate sulfotransferase 2	9.05	12.6	5.13	1.21	1.83	2.37
Hs3st3b1	Heparan sulfate-glucosamine 3-sulfotransferase 3B1	6.26	17.26	7.88	0.05	-0.54	-0.94
Glycosaminoglycan chain degradation
Gene symbol	Gene name	d5 FC	d10 FC	d14 FC	Acomys D5	Acomys D10	Acomys D15
Hexb	Hexosaminidase subunit beta	1.48	1.72	1.37	0.01	0.3	0.12
Hexa	Hexosaminidase subunit alpha	-1.03	-1	1.2	0.39	0.73	0.6
Hyal3	Hyaluronidase 3	1.93	0	0	1.03	0.13	-0.23
Hyal2	Hyaluronidase 2	-1.4	1.13	-1.02	1.22	0.85	0.67
Naglu	N-Acetyl-Alpha-Glucosaminidase	5.39	7.88	7.06	-0.03	0.23	0.28
Hyal1	Hyaluronidase 1	-1.28	6.16	4.64	2.98	1.23	0.28
Gusb	Glucoronidase beta	2.05	2.32	2.96	1.46	1.05	1.04
Naga	Alpha-N-Acetylgalactosaminidase	1.98	1.93	2.67	1.08	0.67	0.6
Galns	Galactosamine (N-acetyl)-6-sulfatase	1.71	3.03	2.46	1.78	1.29	1.25
Arsk	Arylsulfatse family member K	-1.54	0	2.37	-0.66	-0.88	-1.16
Arsb	Arylsulfatase A	1.91	1.92	2.26	0.65	1.42	1.38
Idua	Alpha-L-iduronidase	2.11	2.37	1.97	-0.51	-0.05	0.13
Sgsh	N-Sulfoglucosamine Sulfohydrolase	-2.08	1.52	1.16	0.12	0.07	0.23
Hpse	Heparanase	3.85	0	0	0.25	0.28	-0.25
